# Supplementary material for: CNVrd, a Read-Depth Algorithm for Assigning Copy-Number at the FCGR Locus: Population-Specific Tagging of Copy Number Variation at FCGR3B
Source: PubMed Central journal article supplement (PMC3640002; doi:10.1371/journal.pone.0063219), 2013-04-30

NA07048

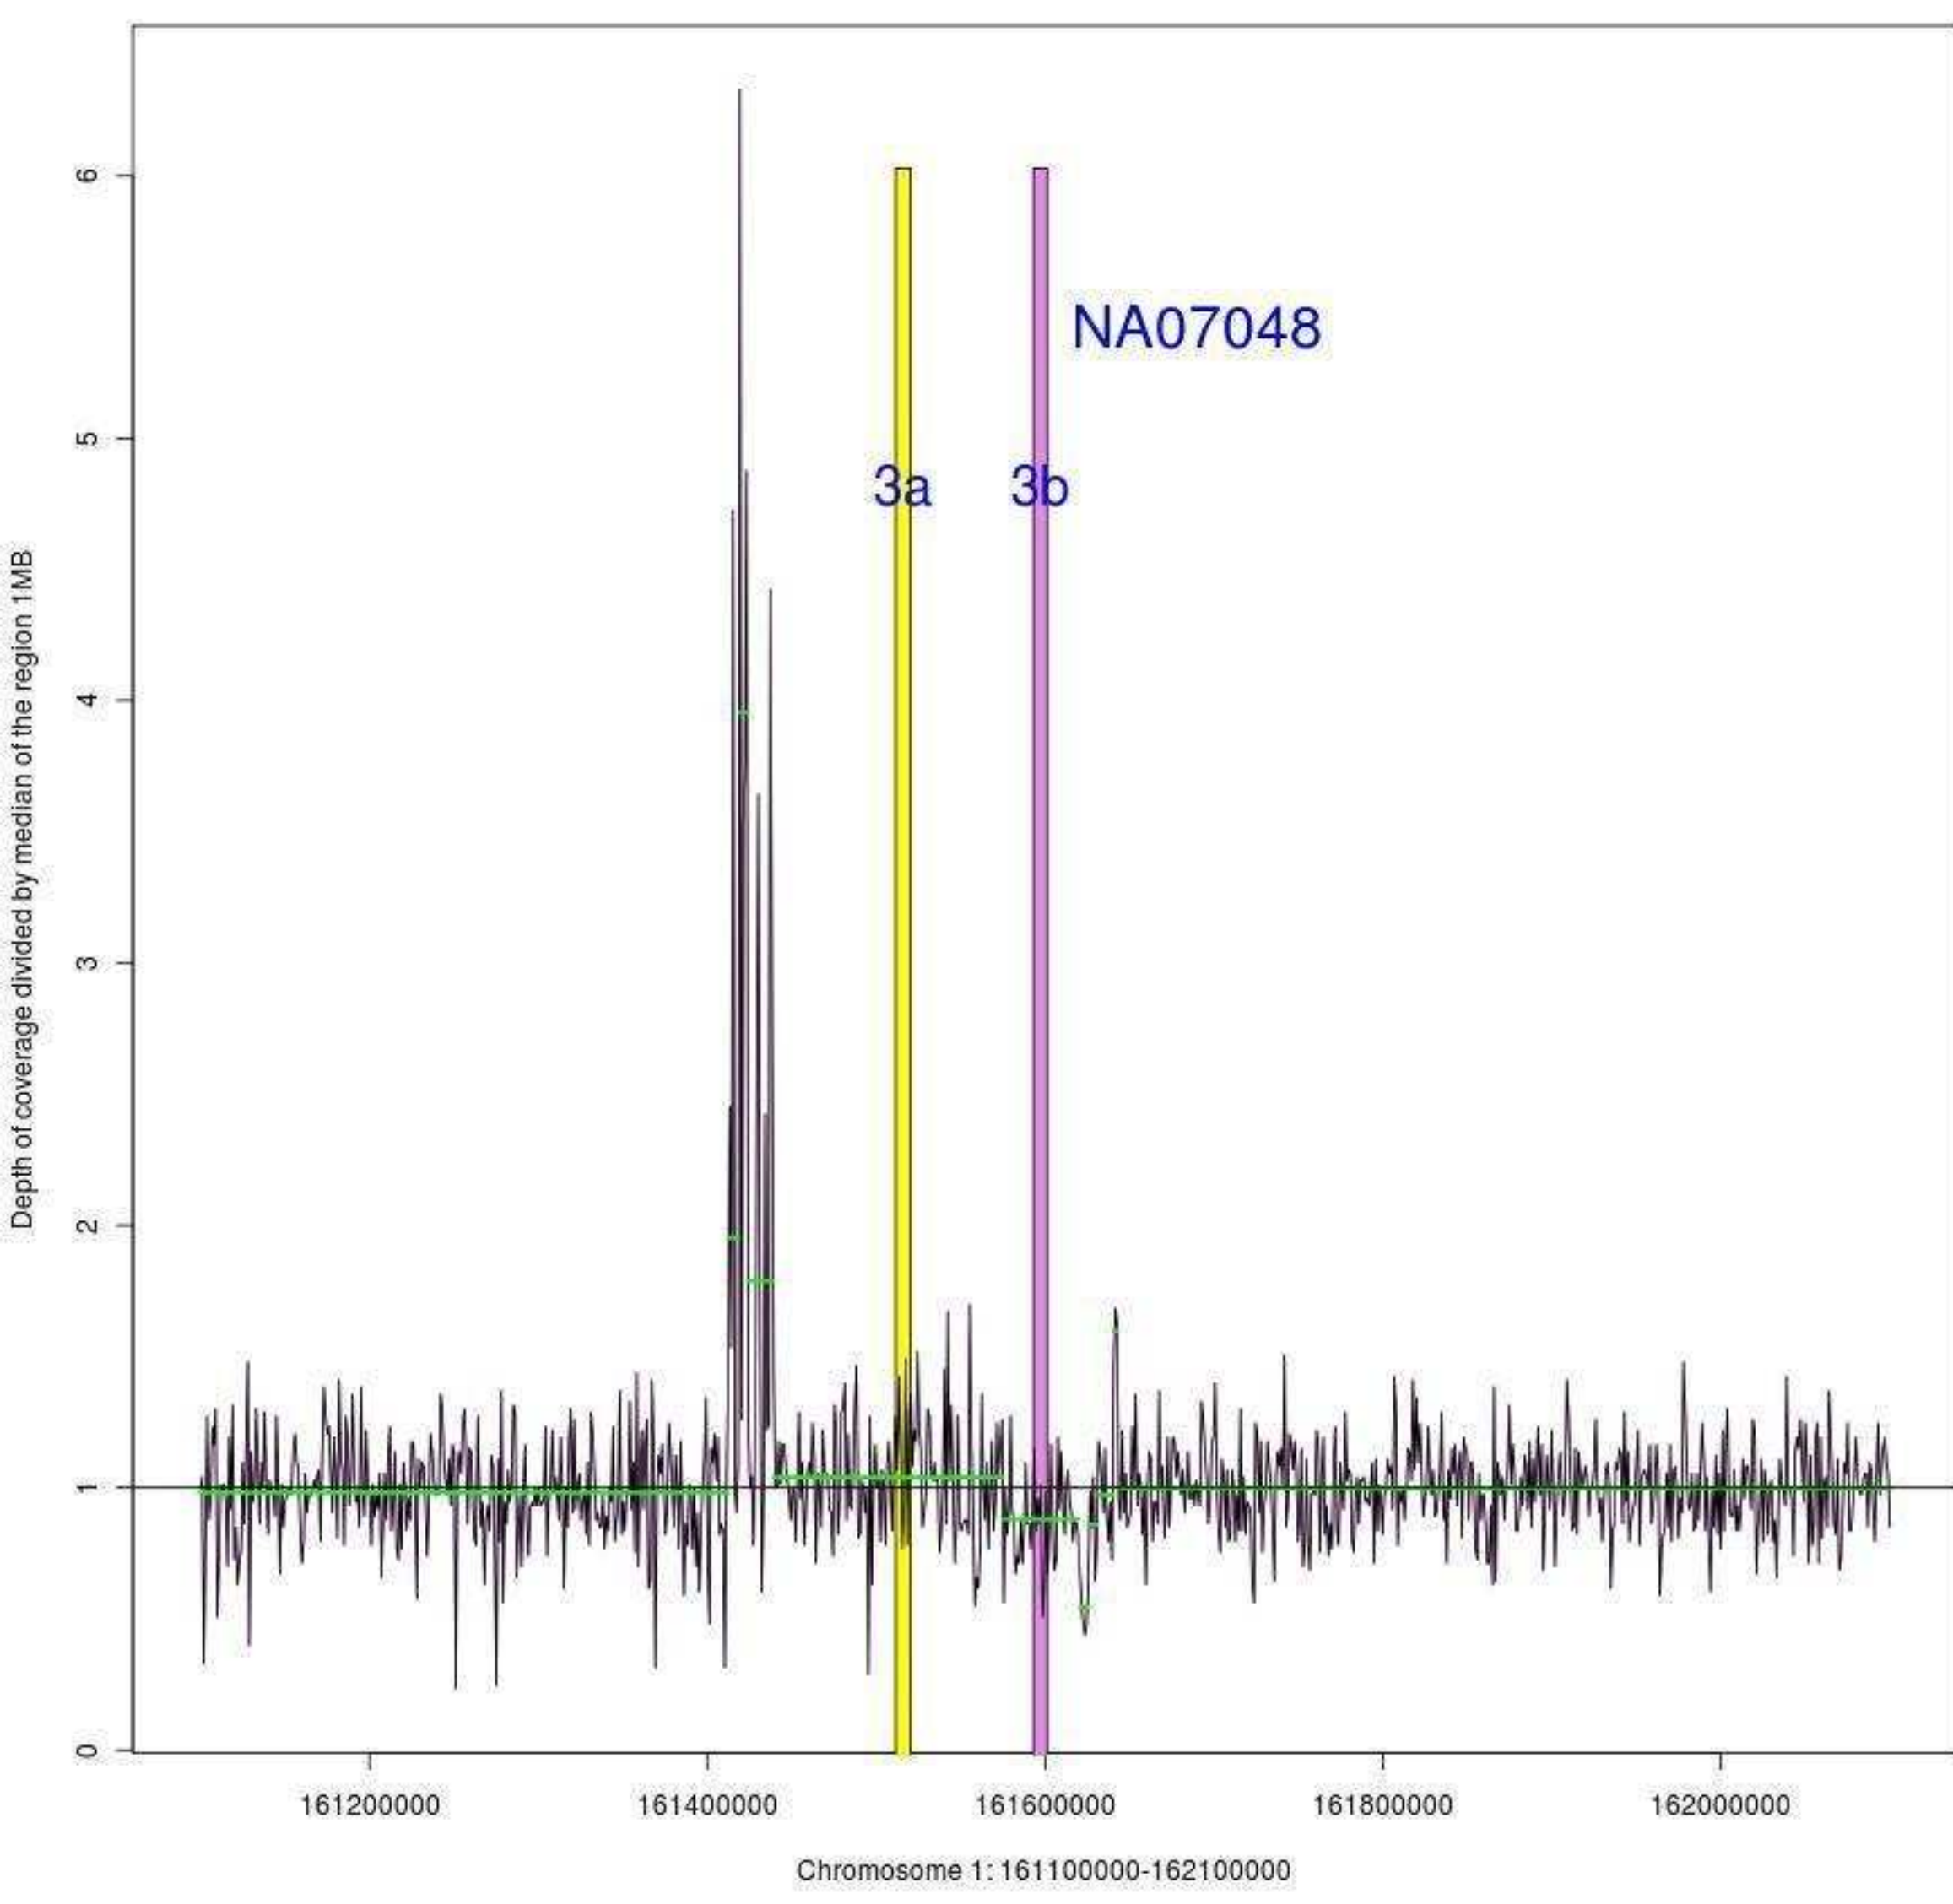

NA07048

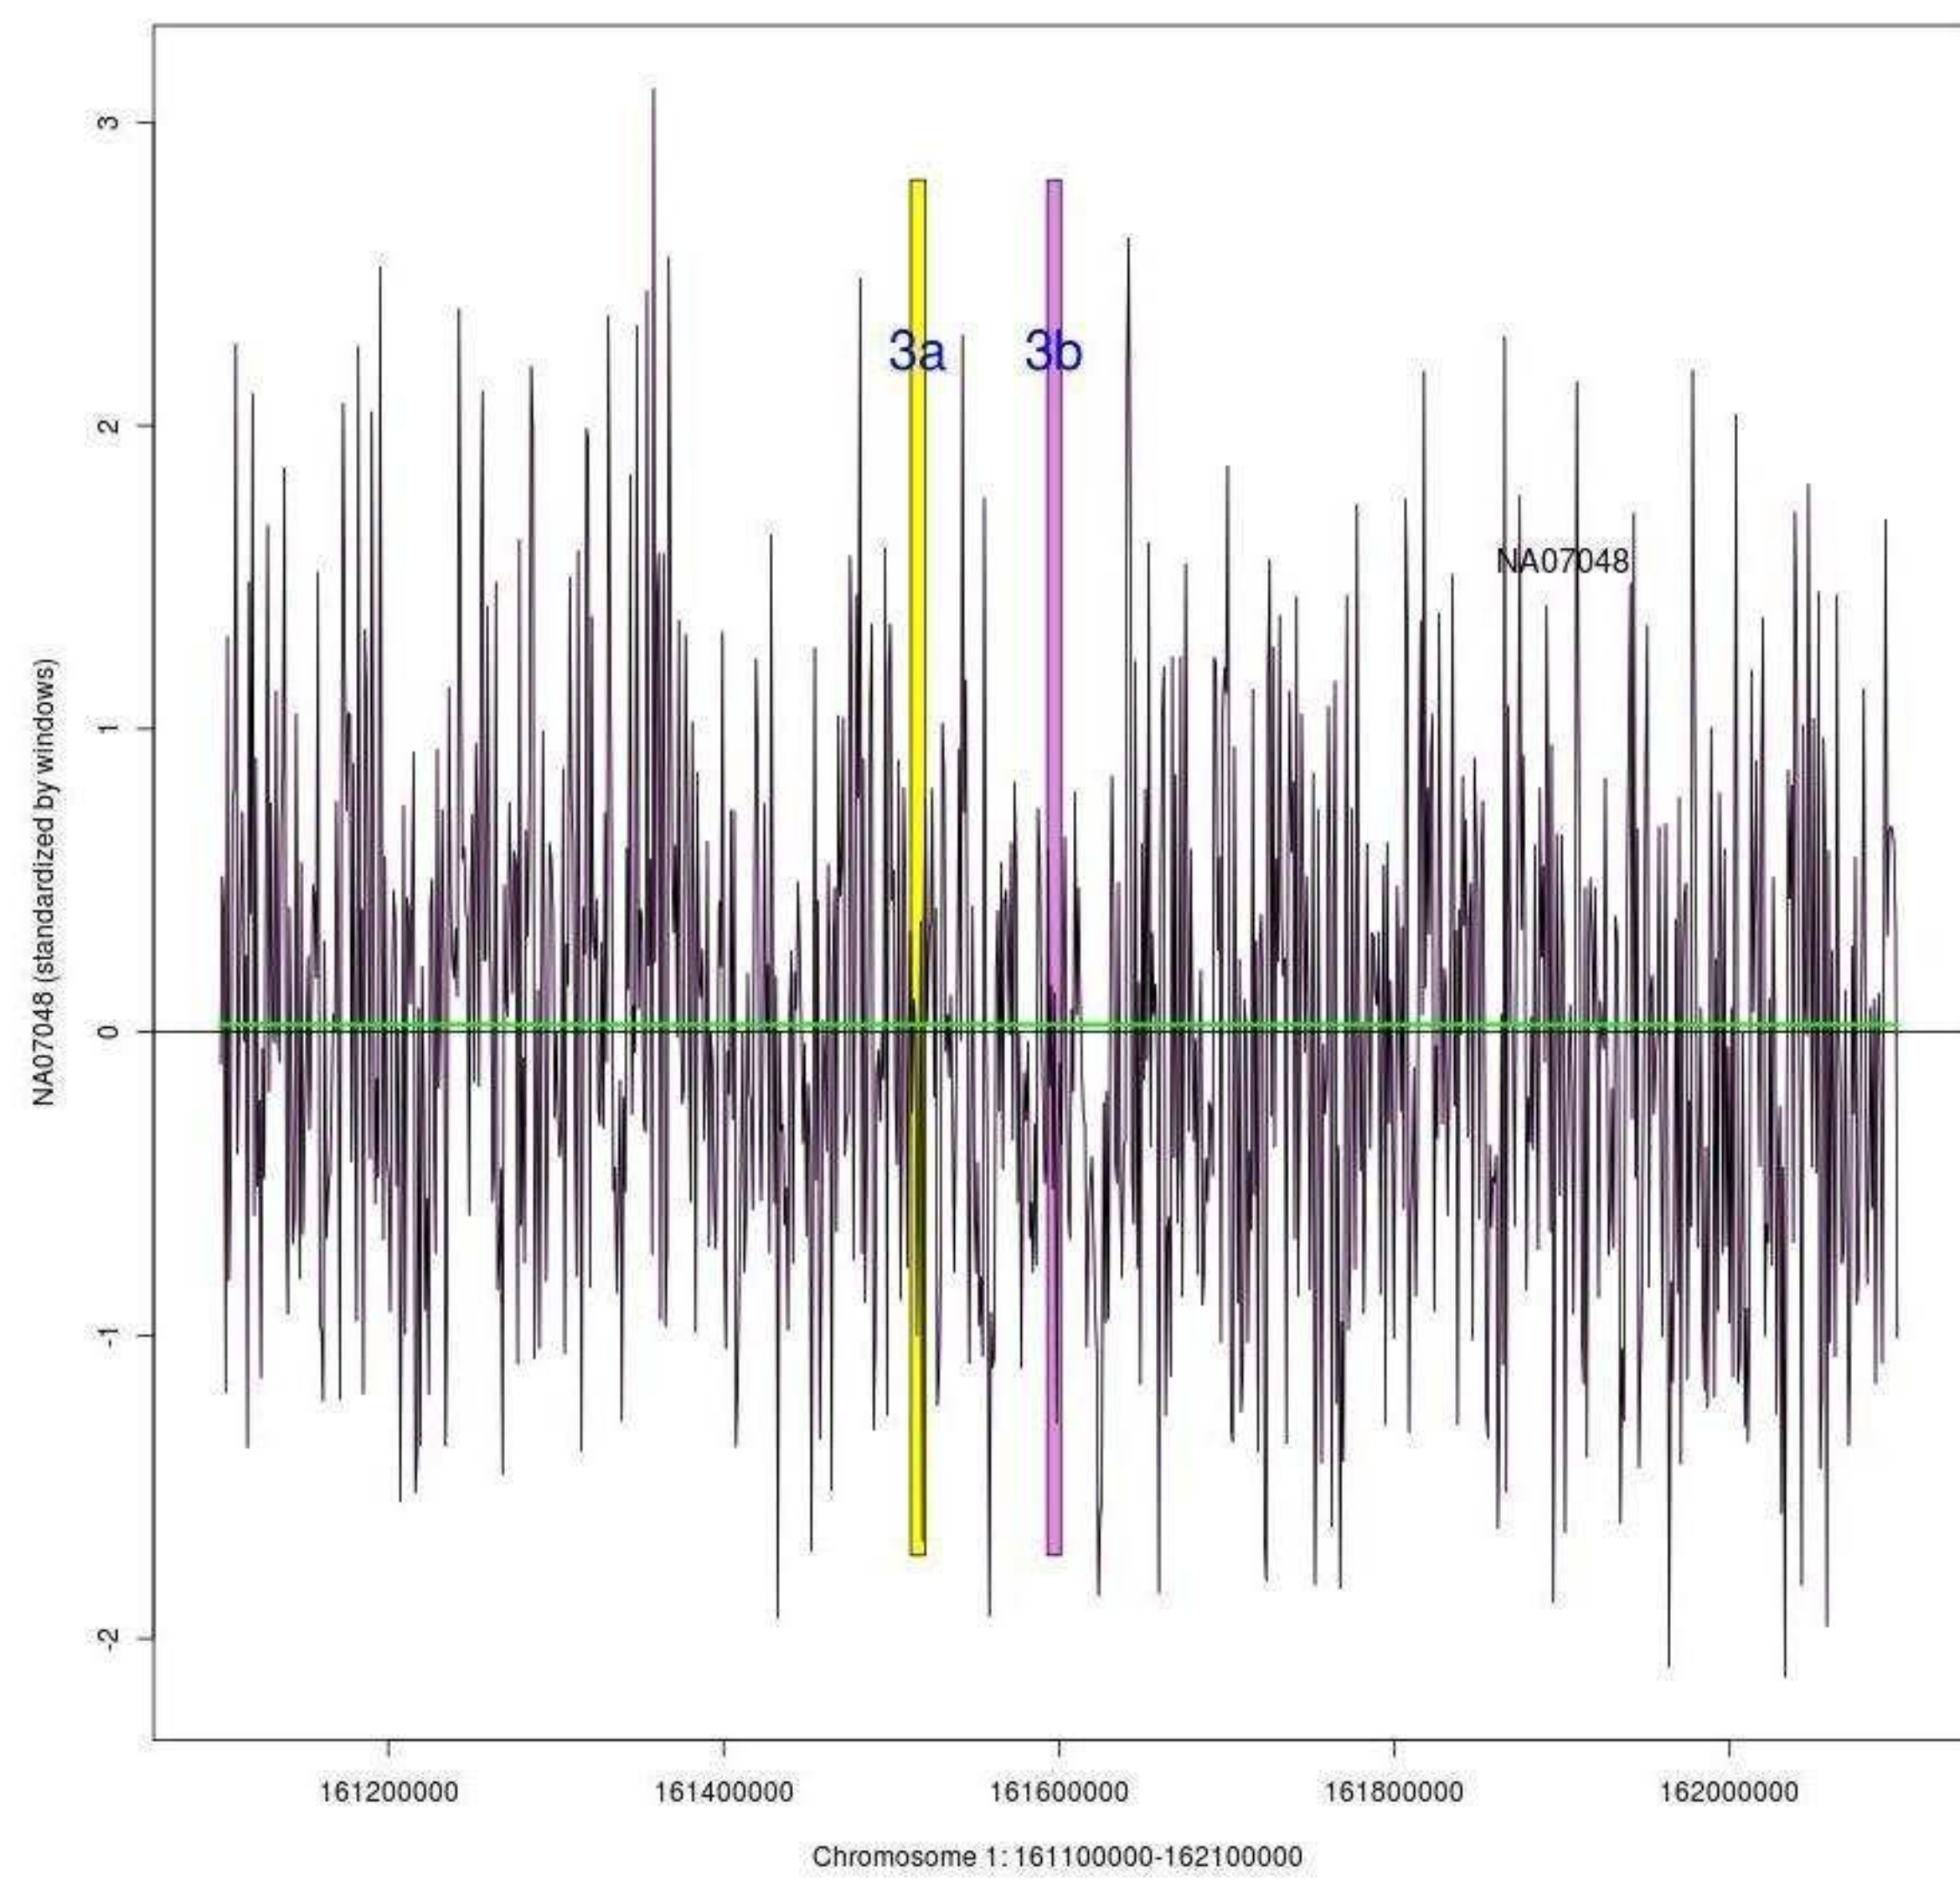

NA07056

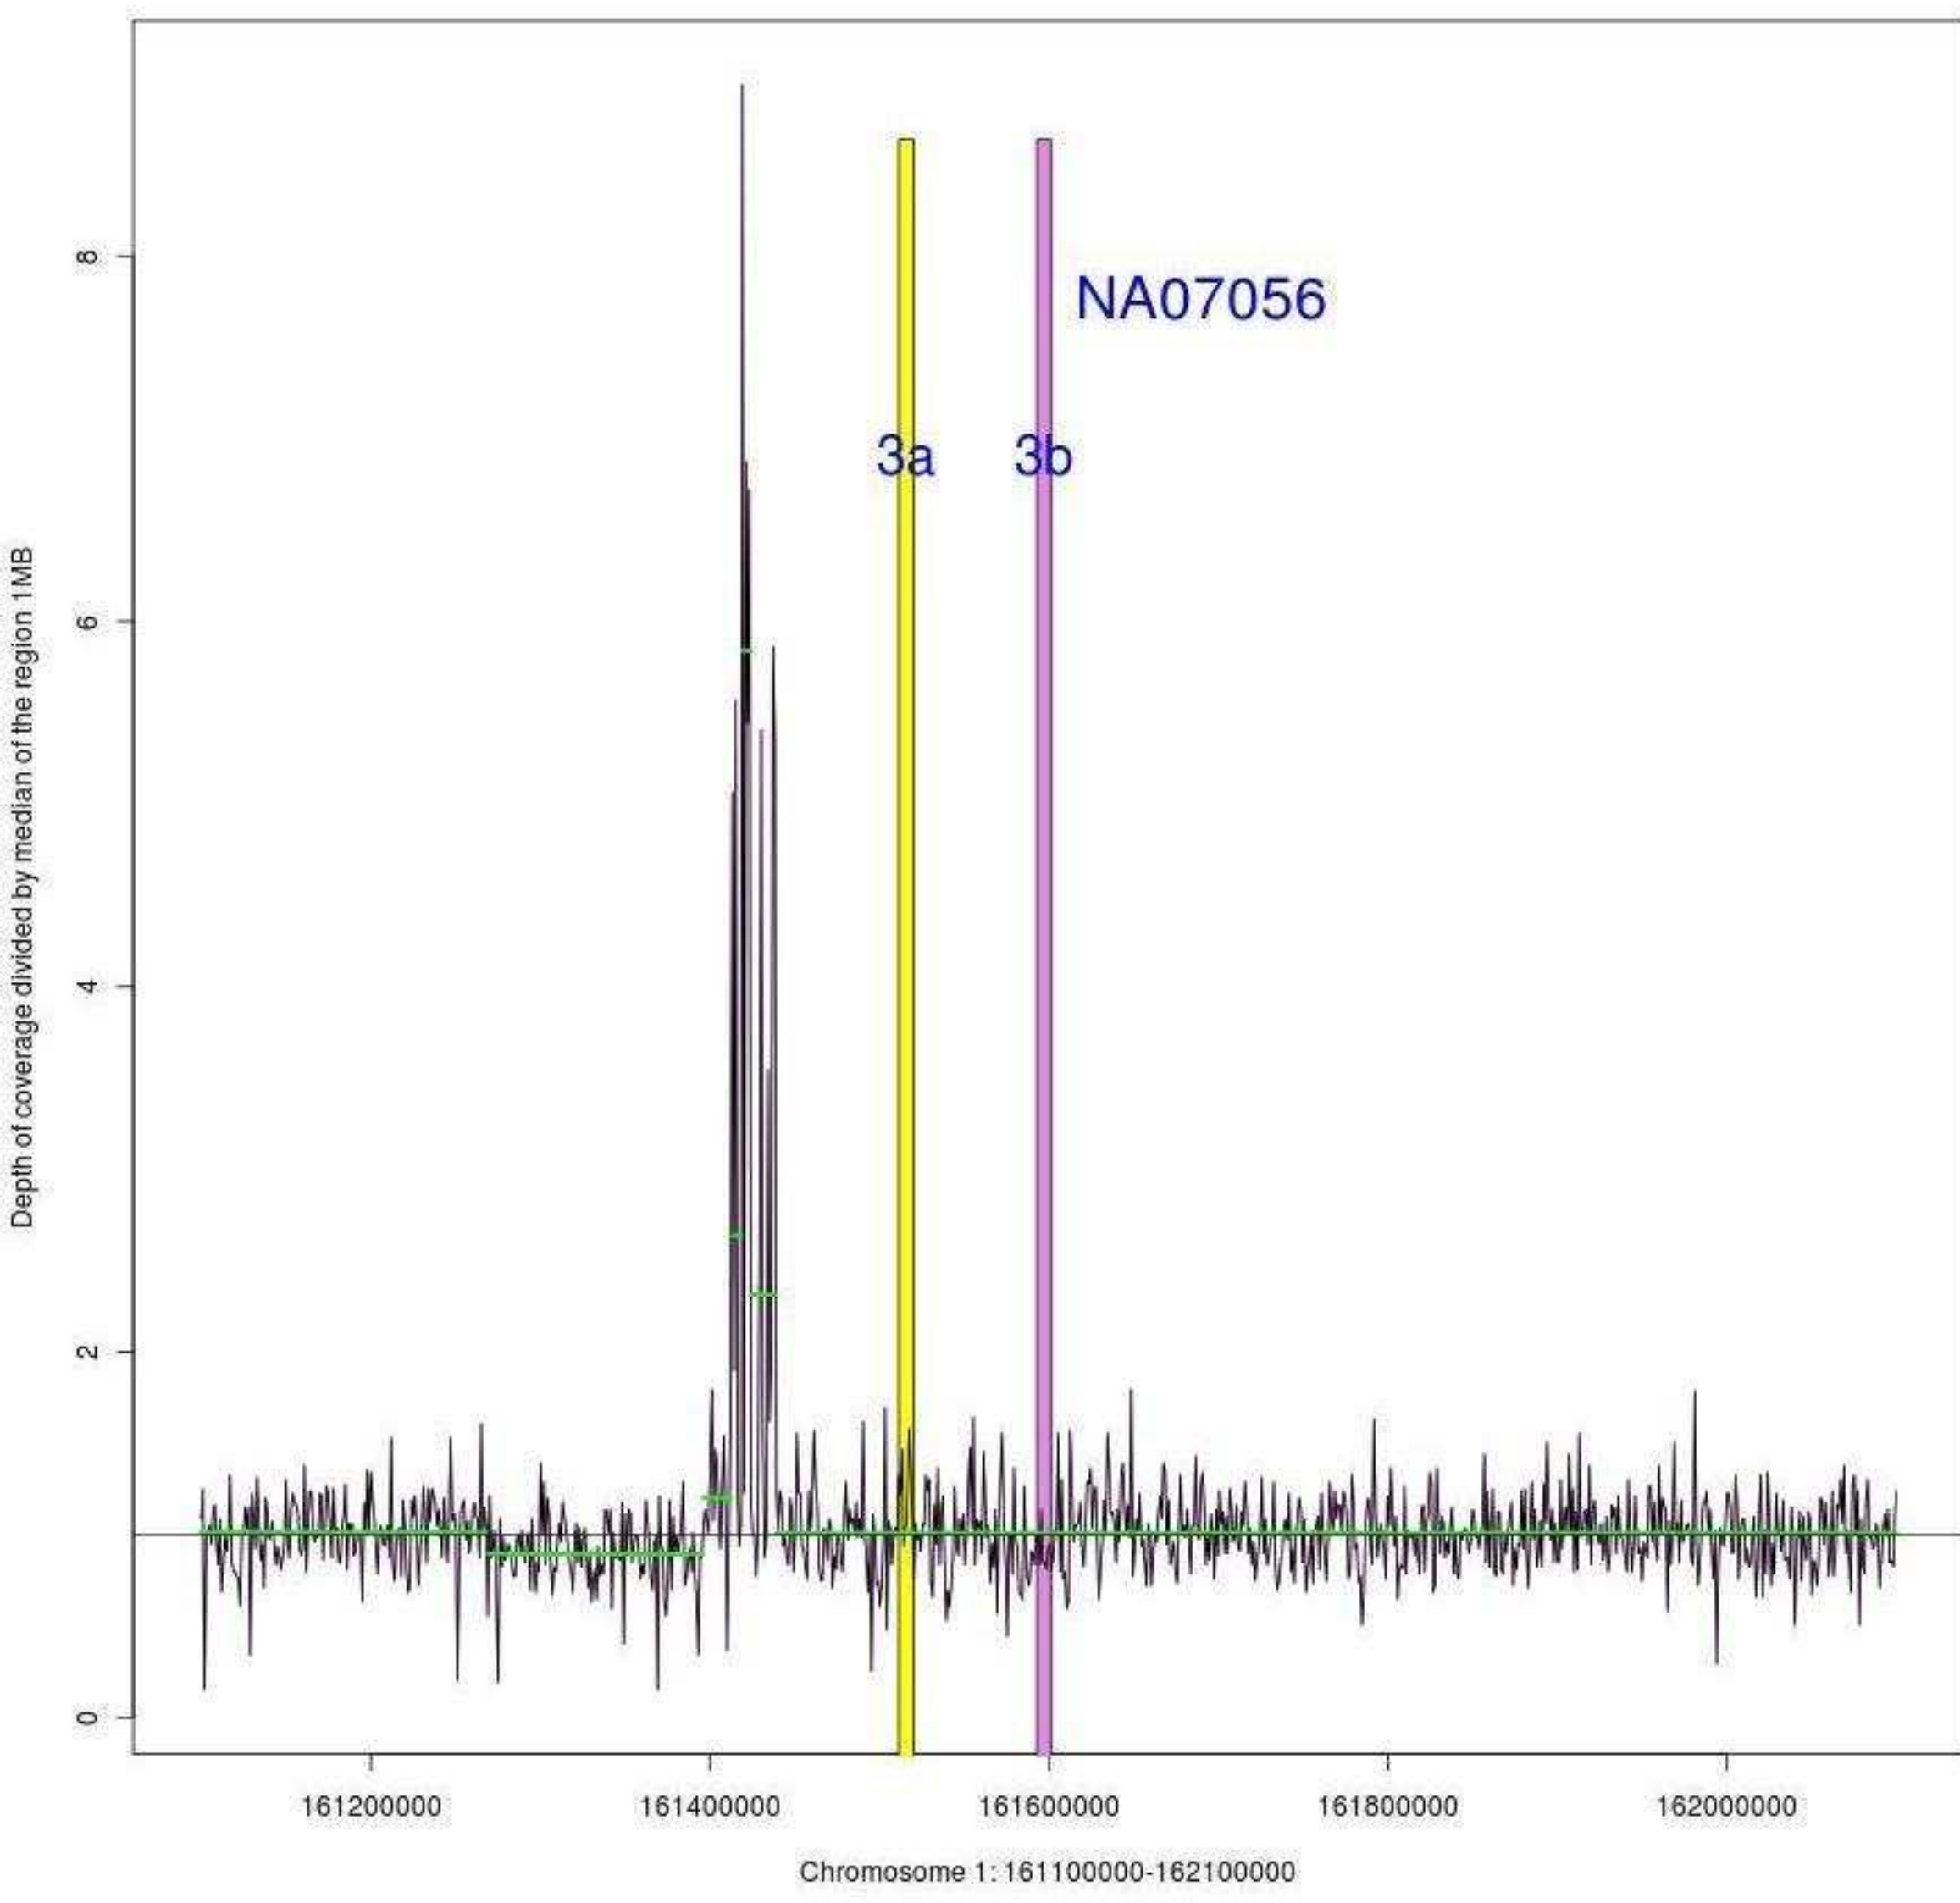

NA07056

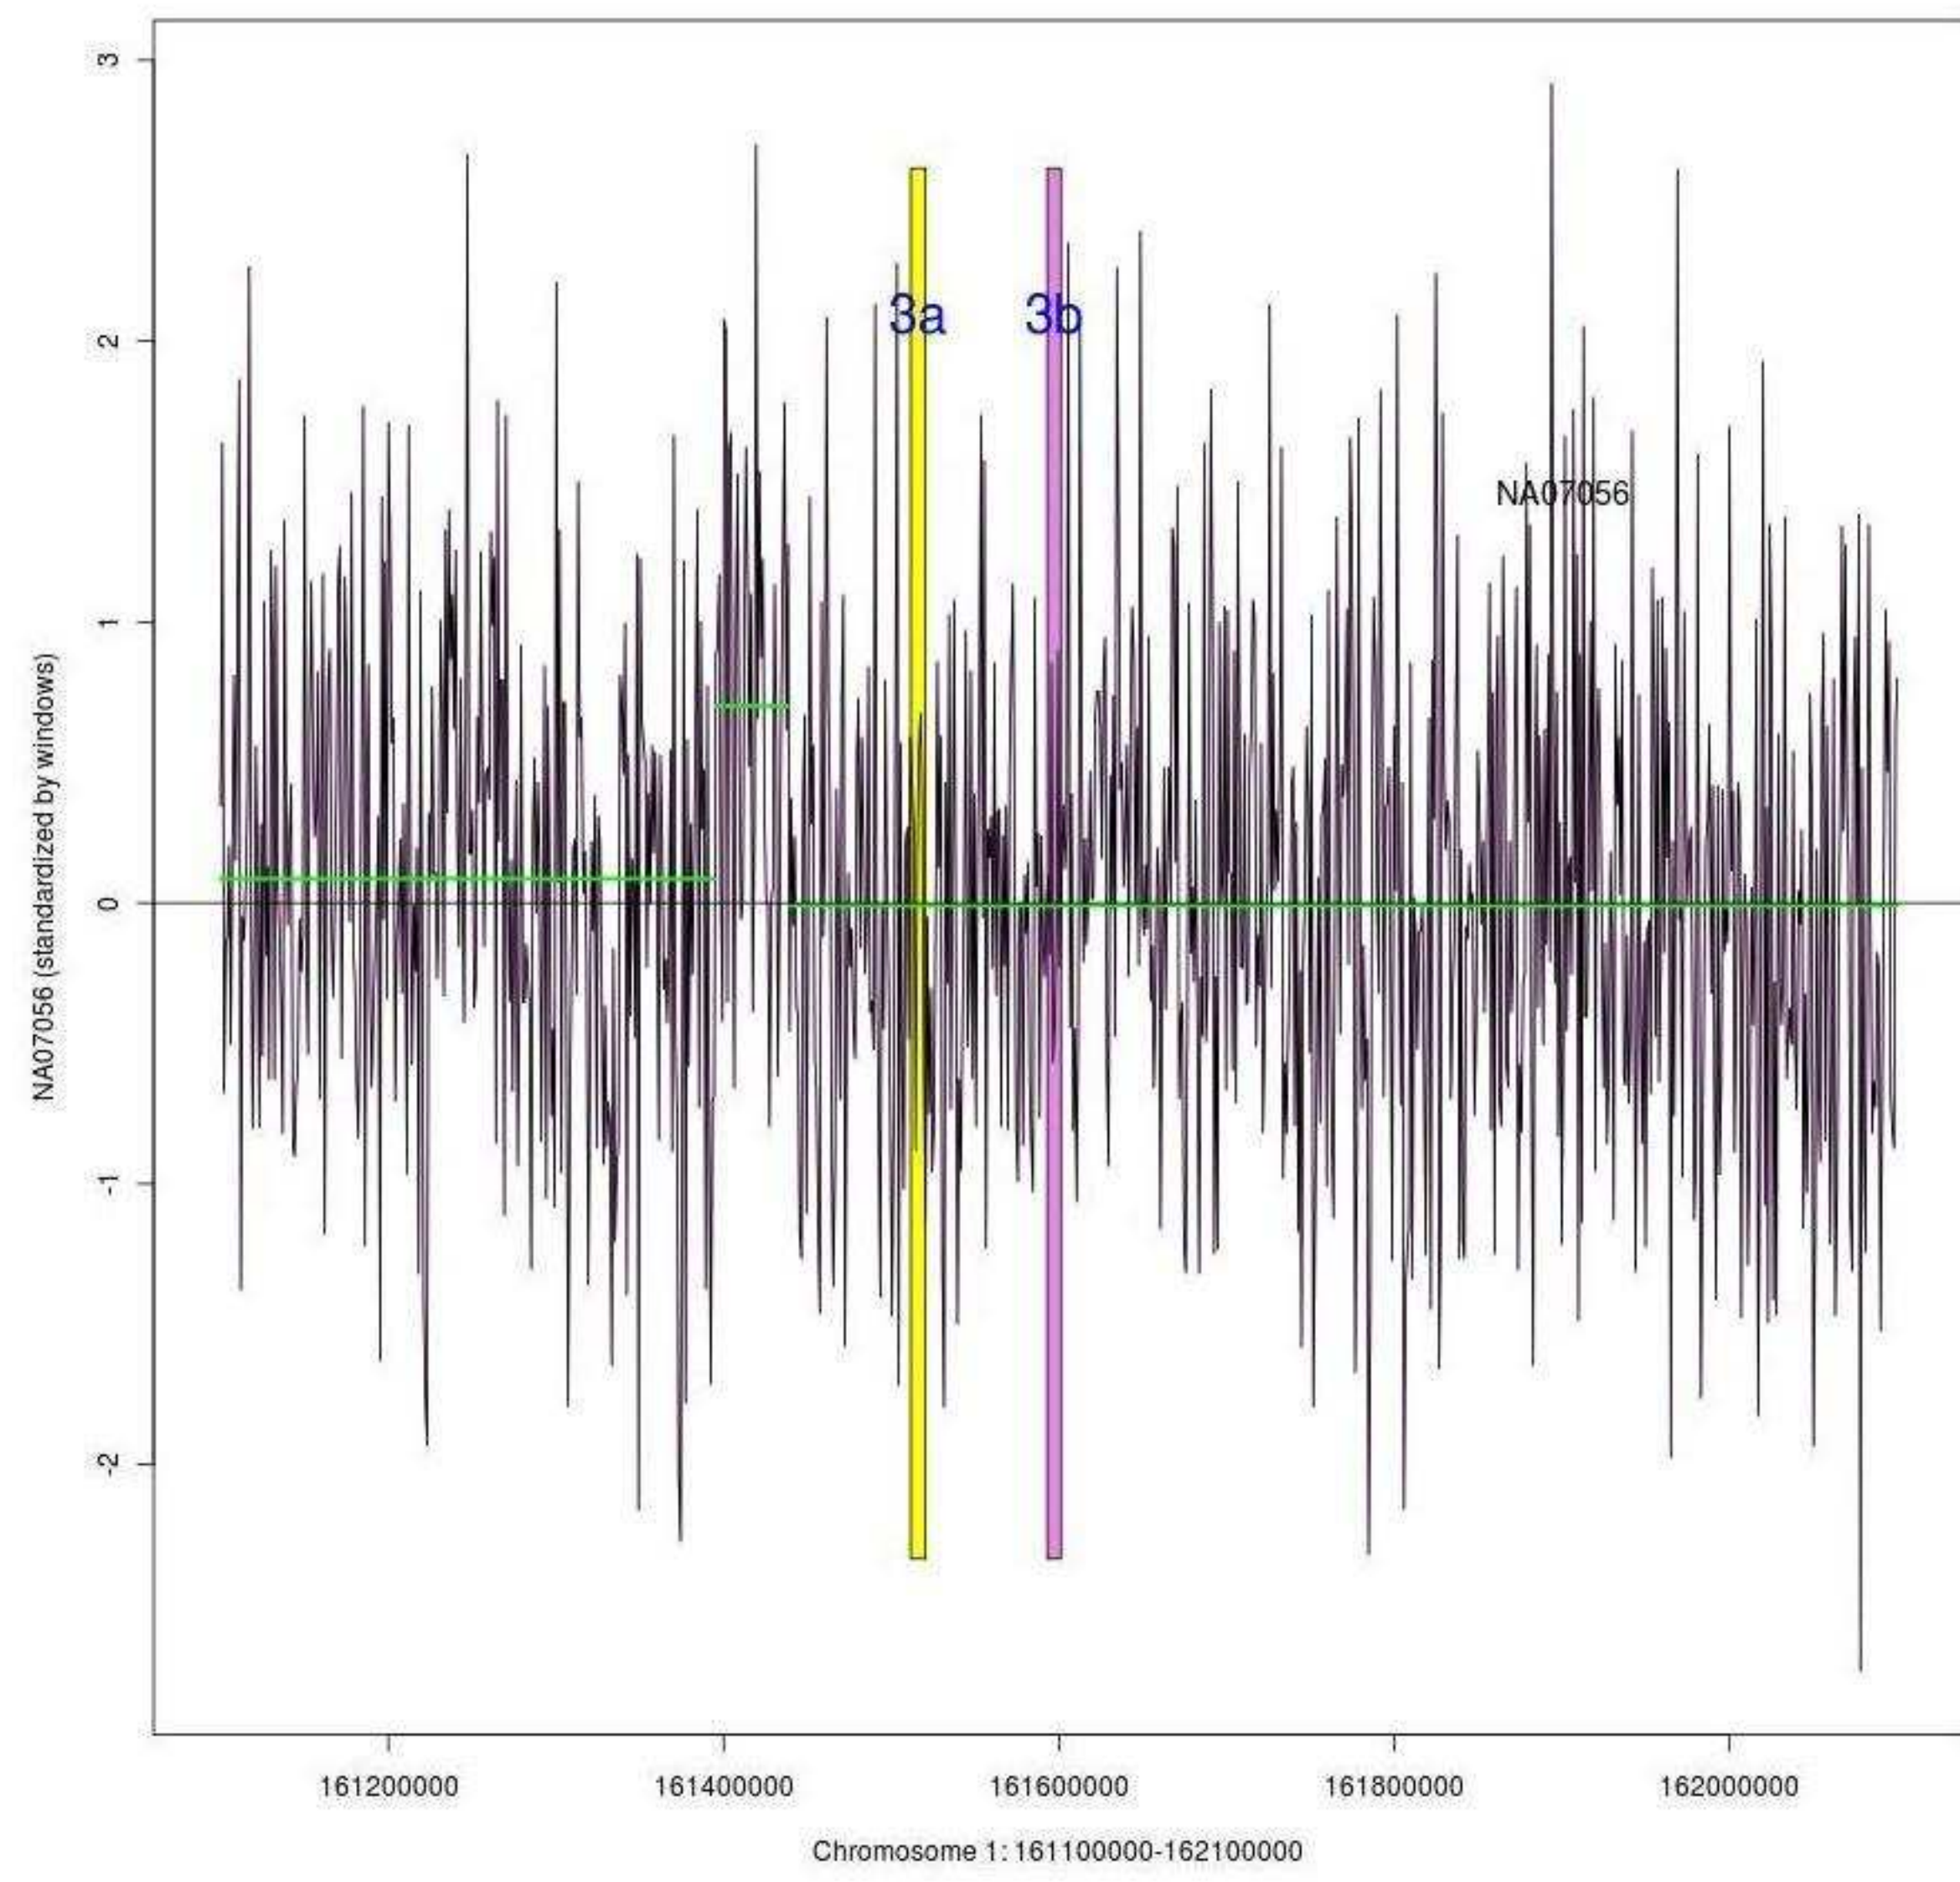

NA10851

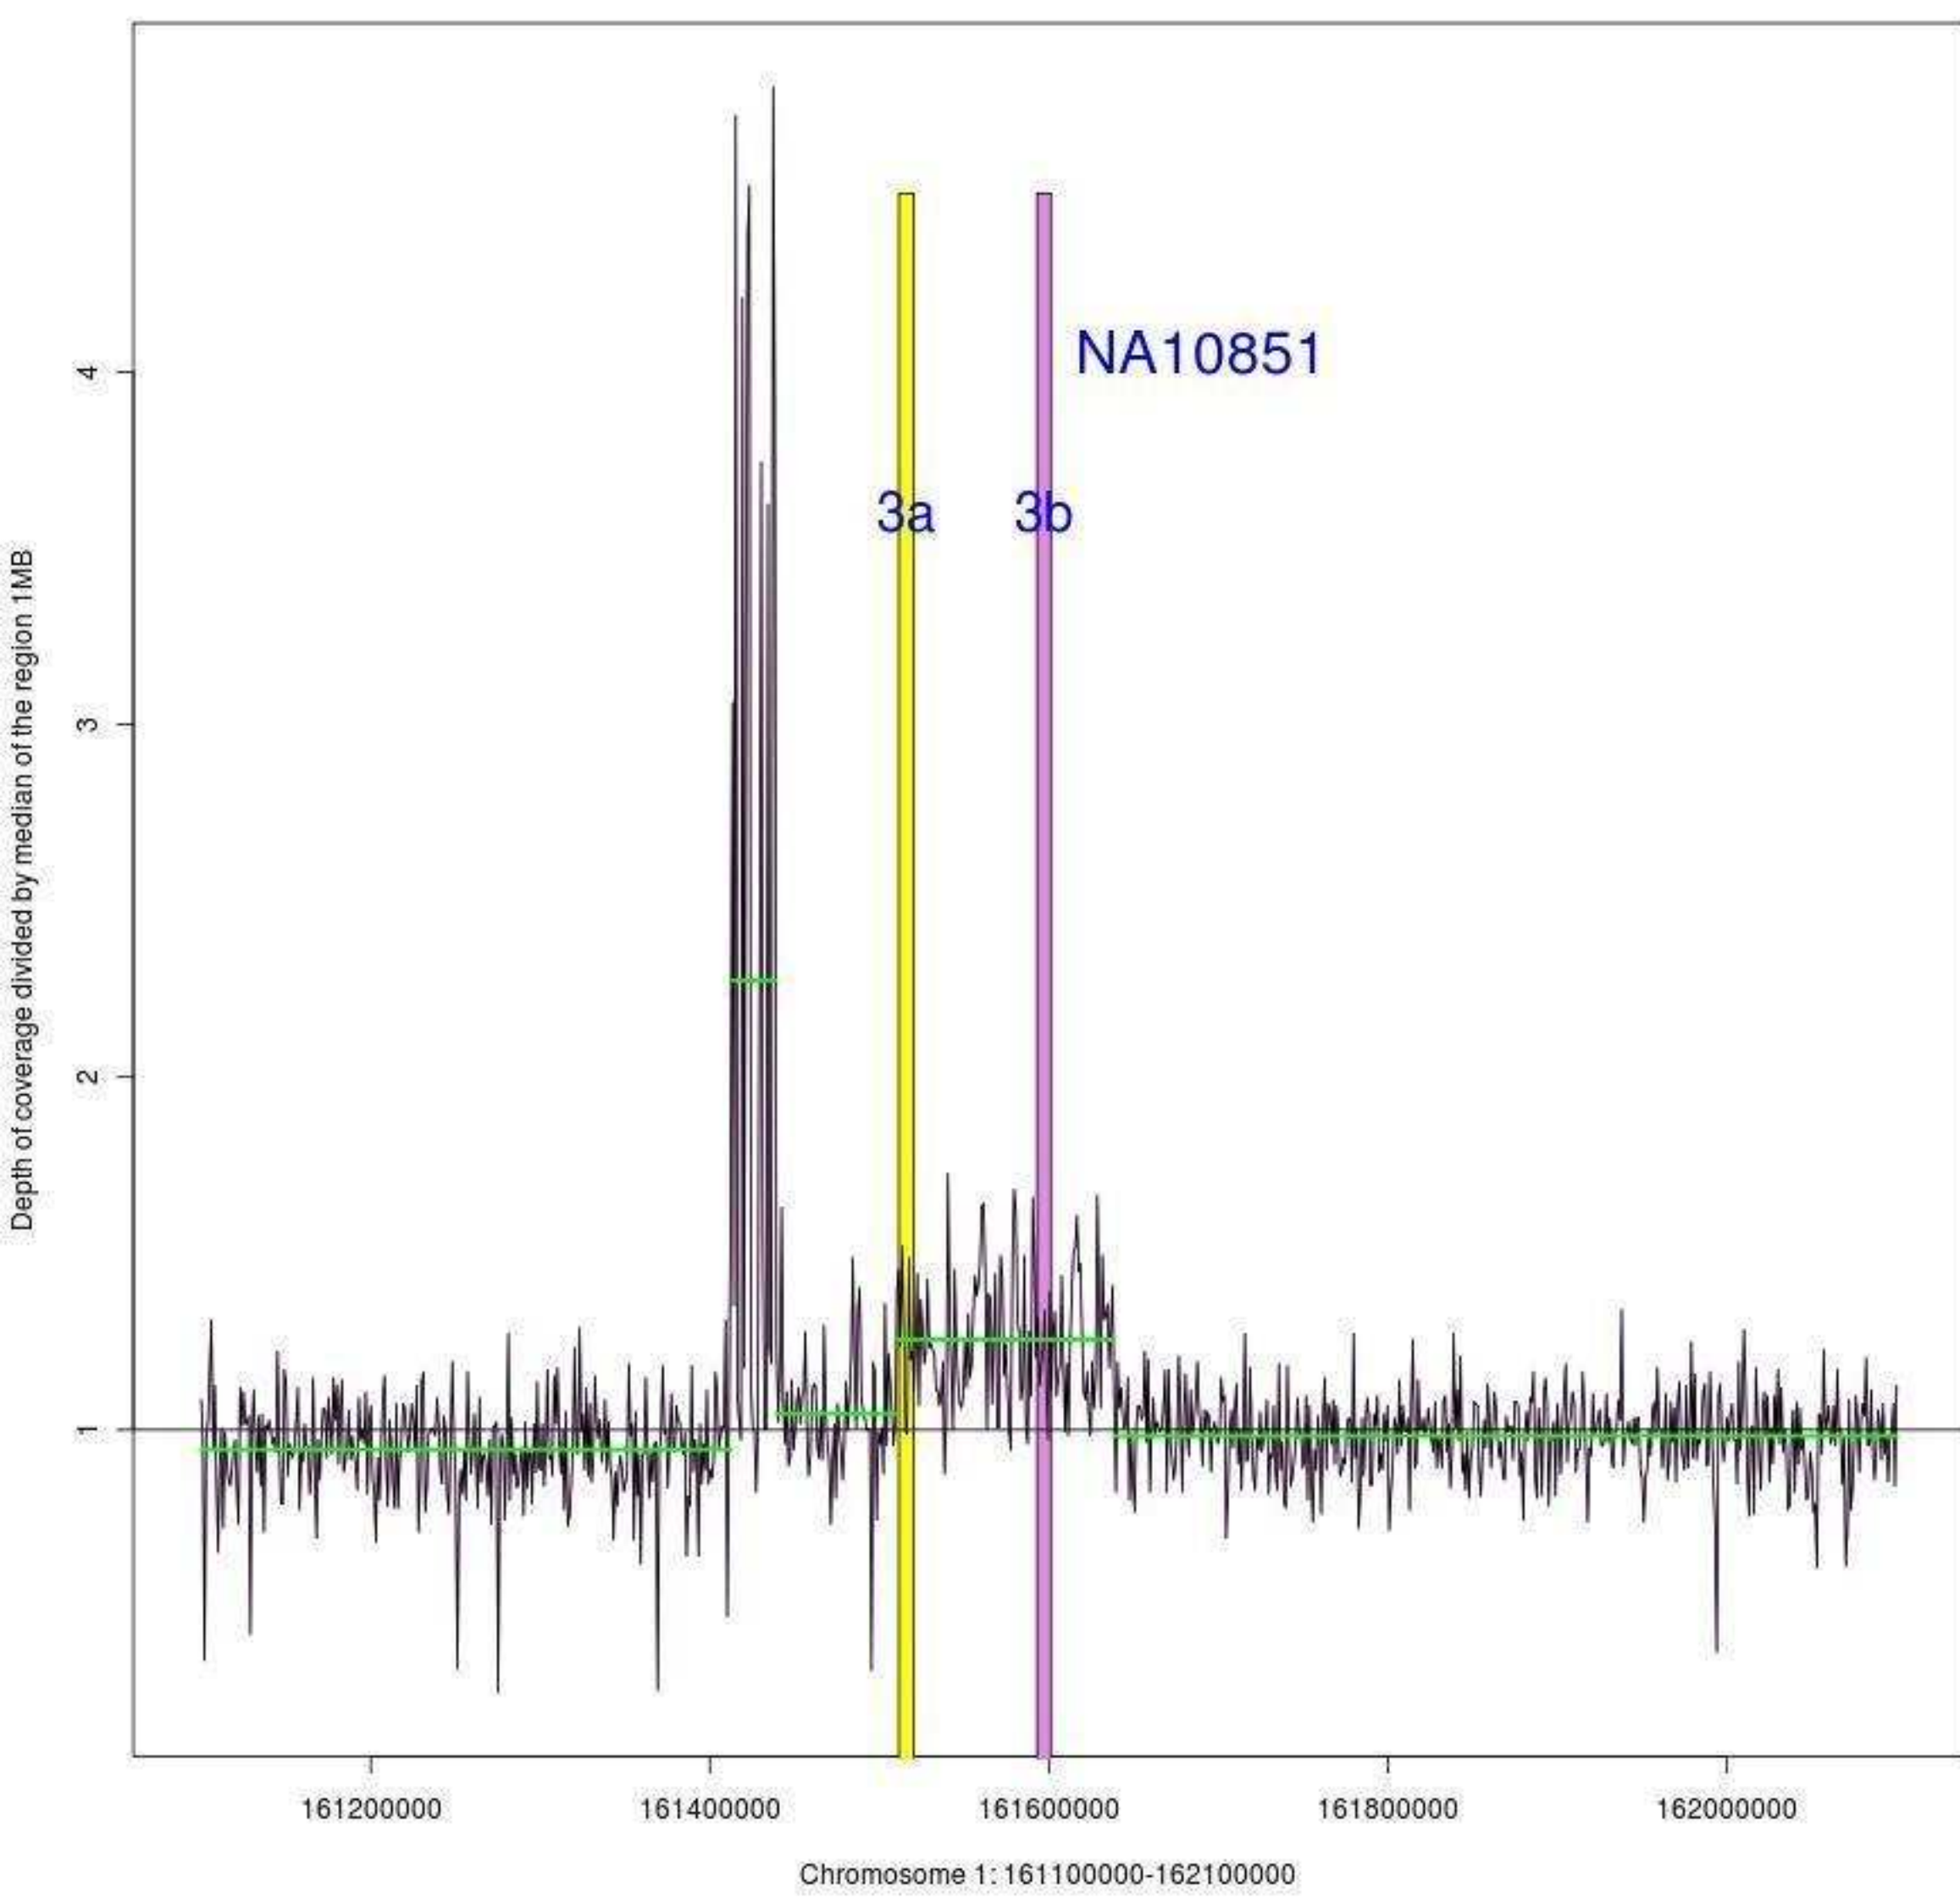

NA10851

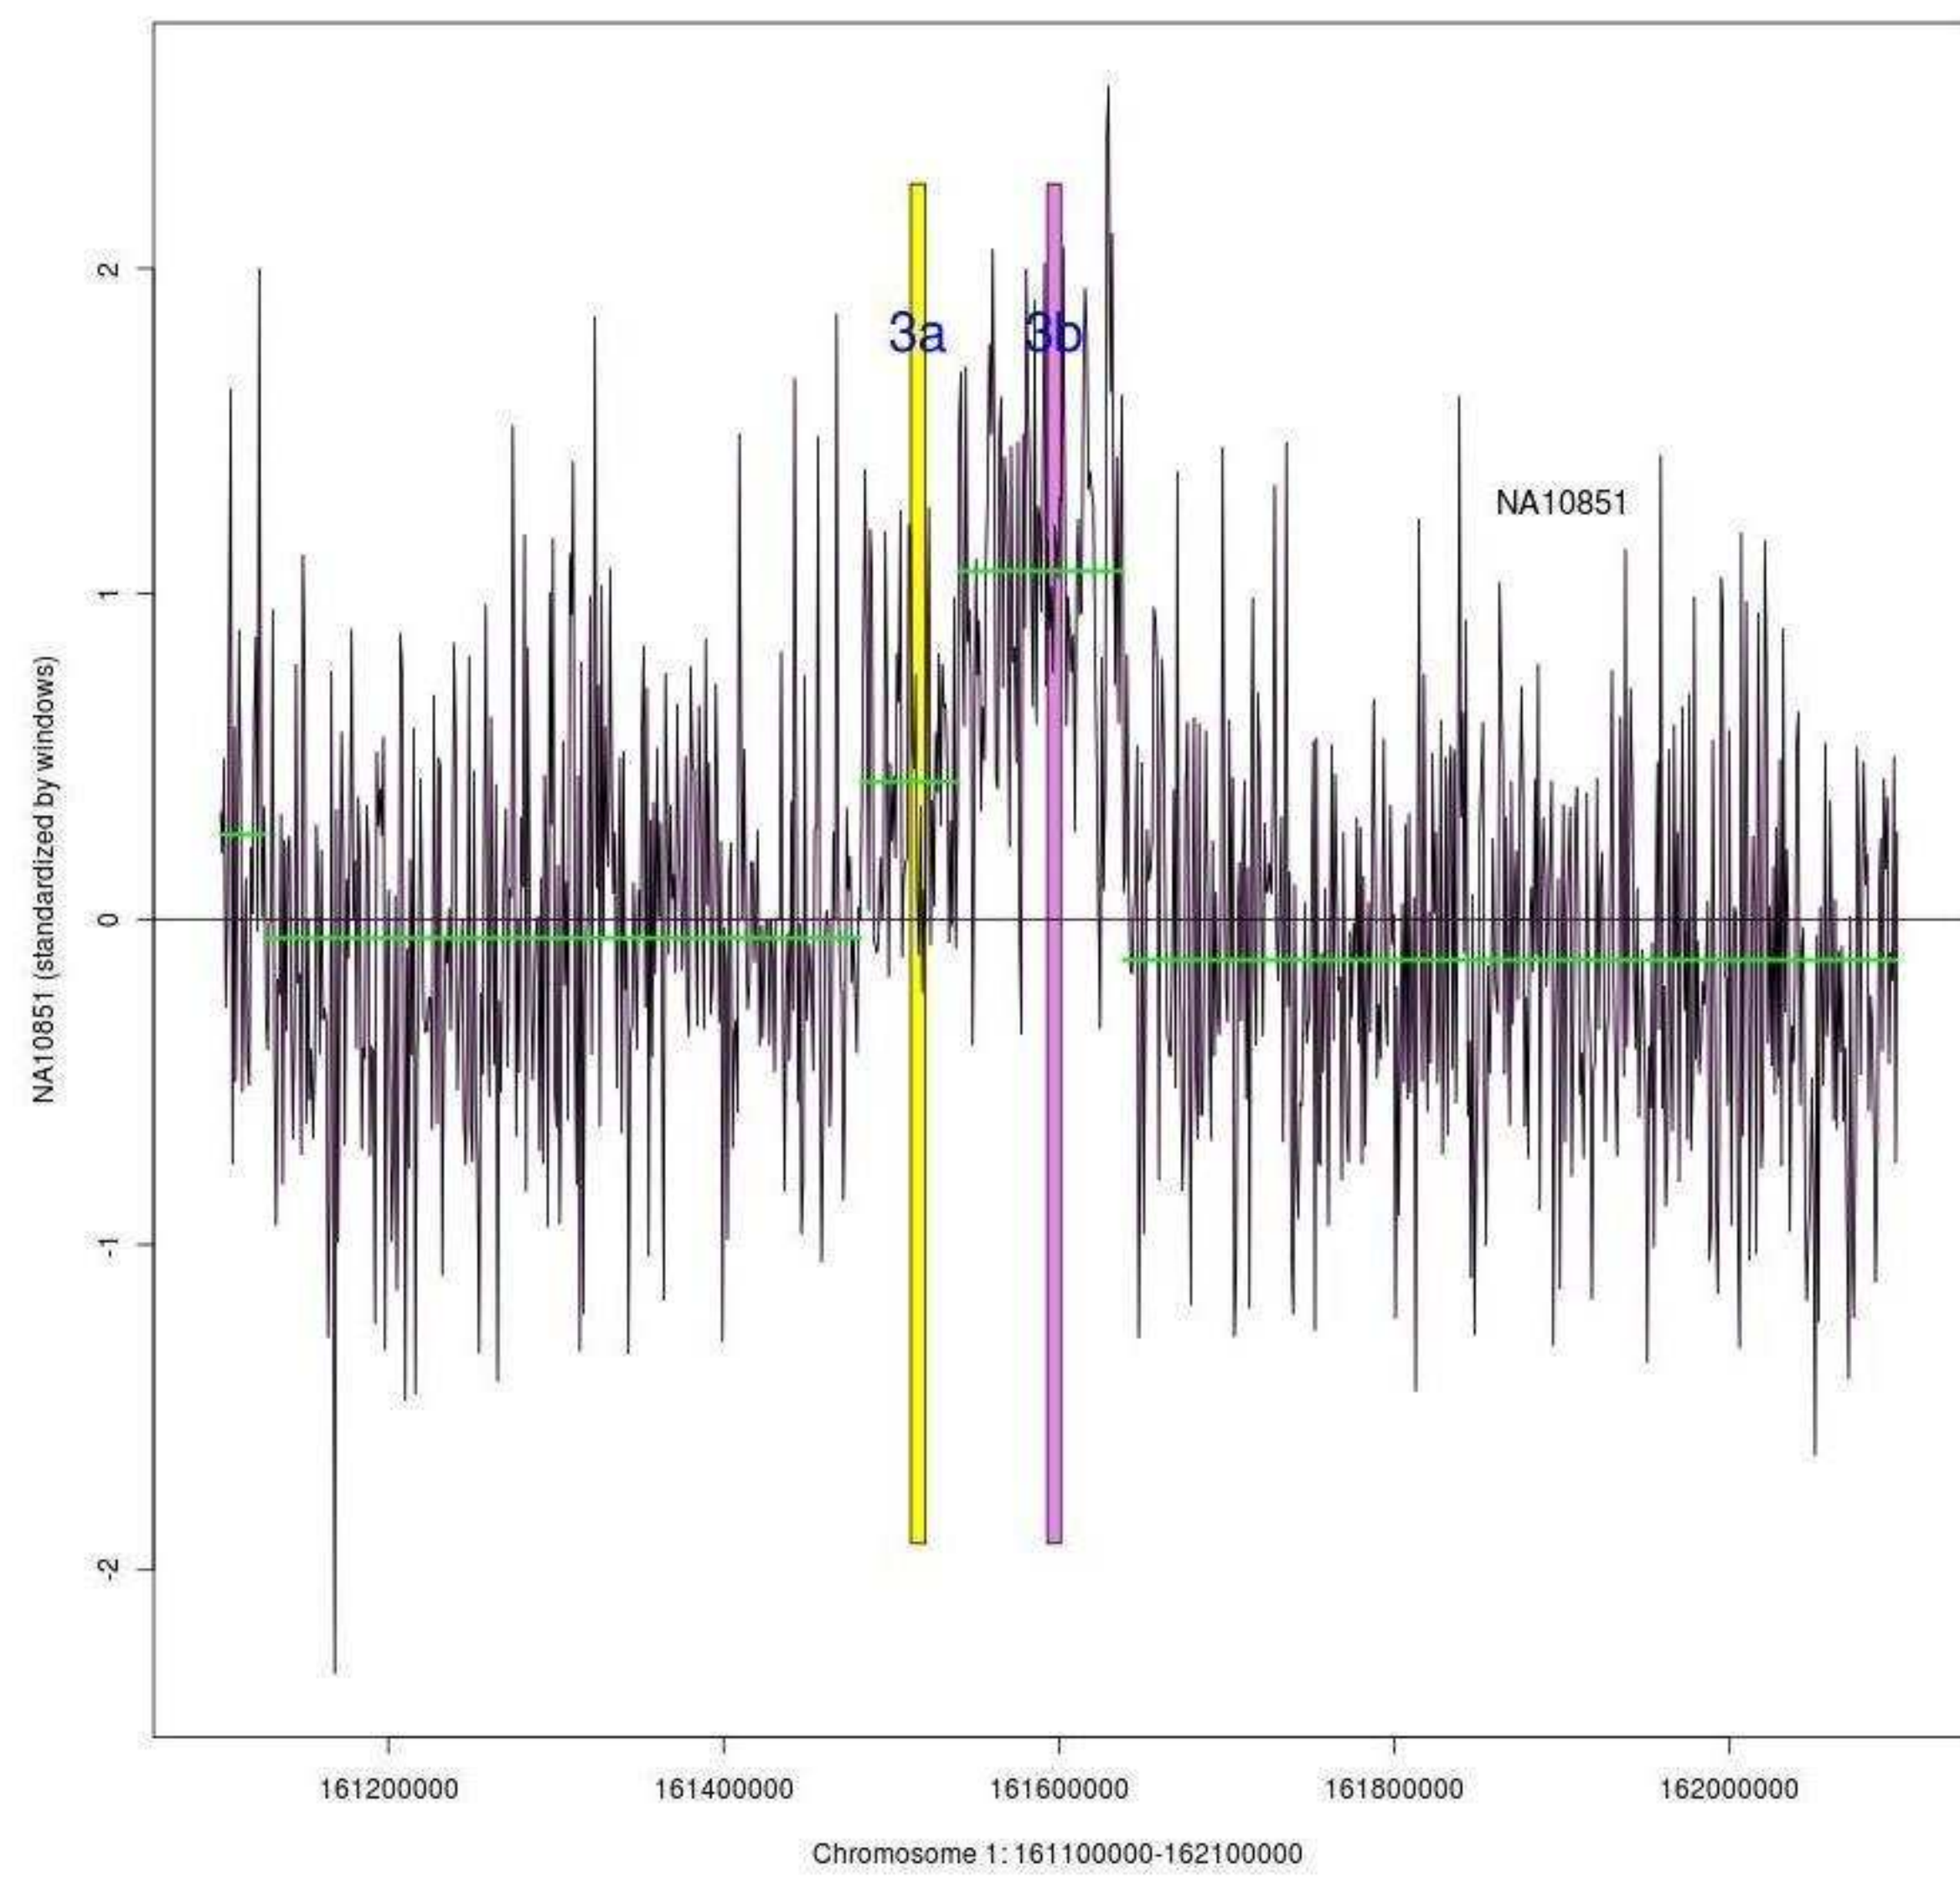



NA11993

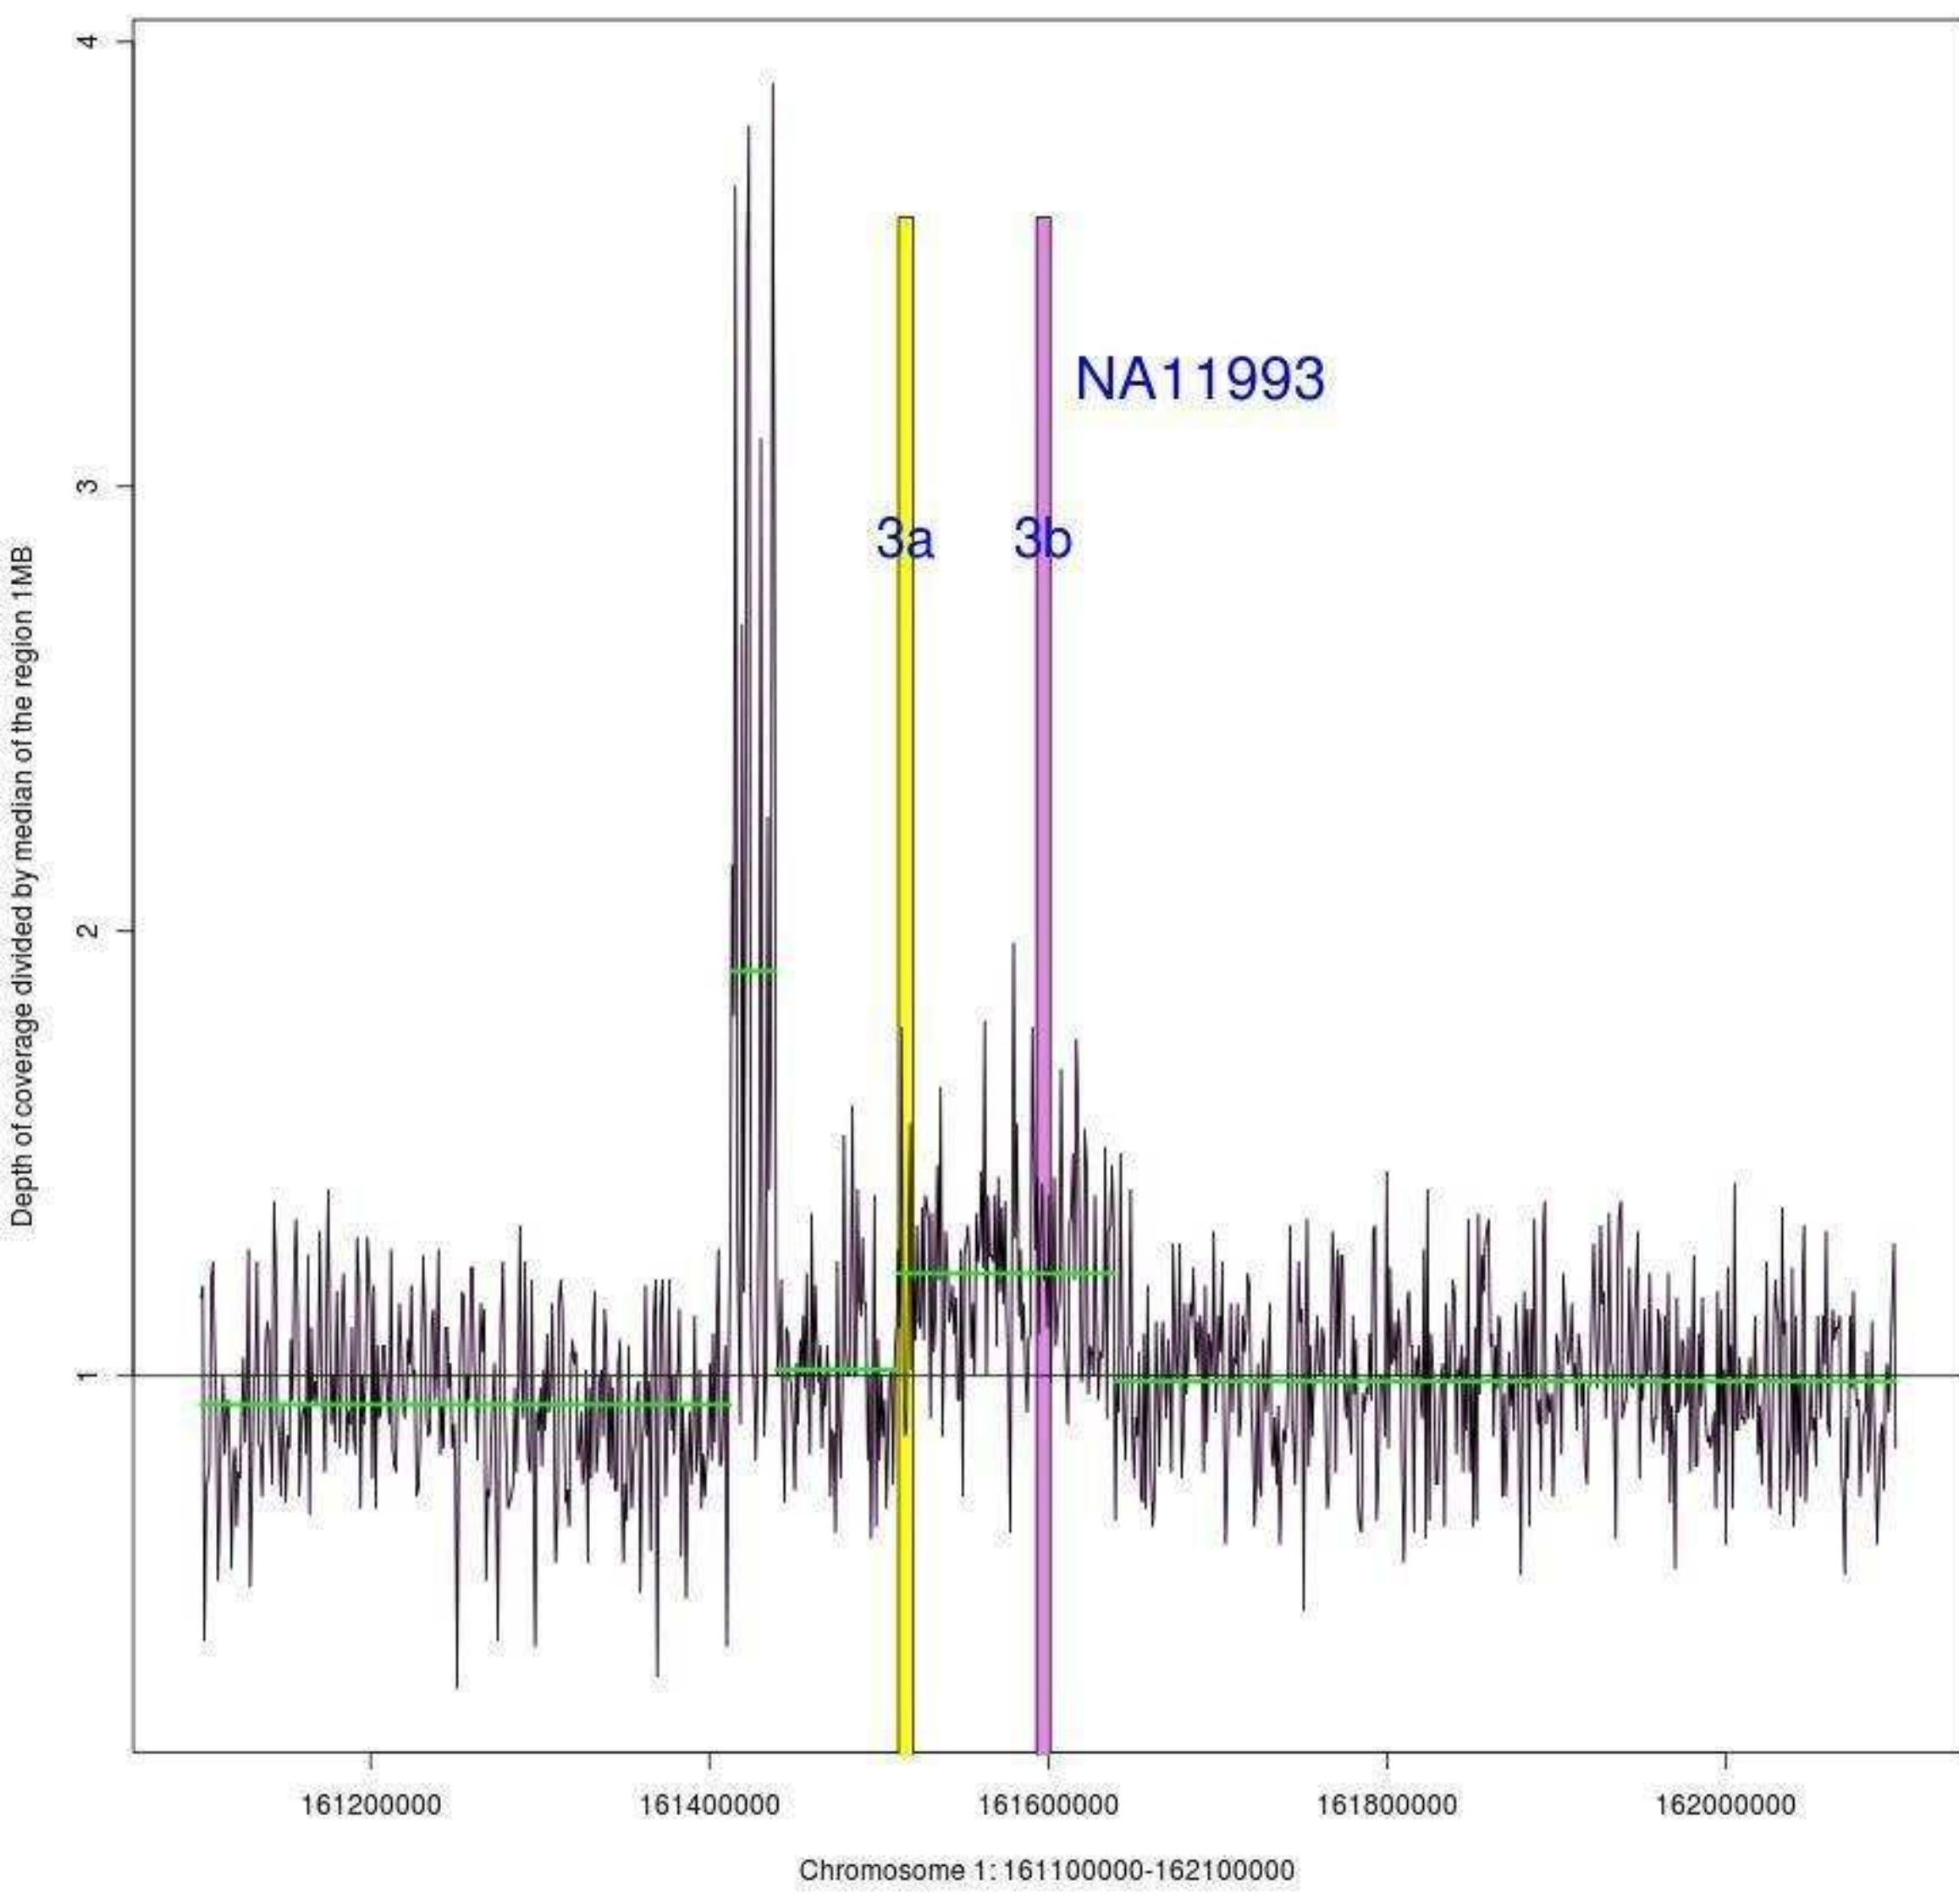

NA11993

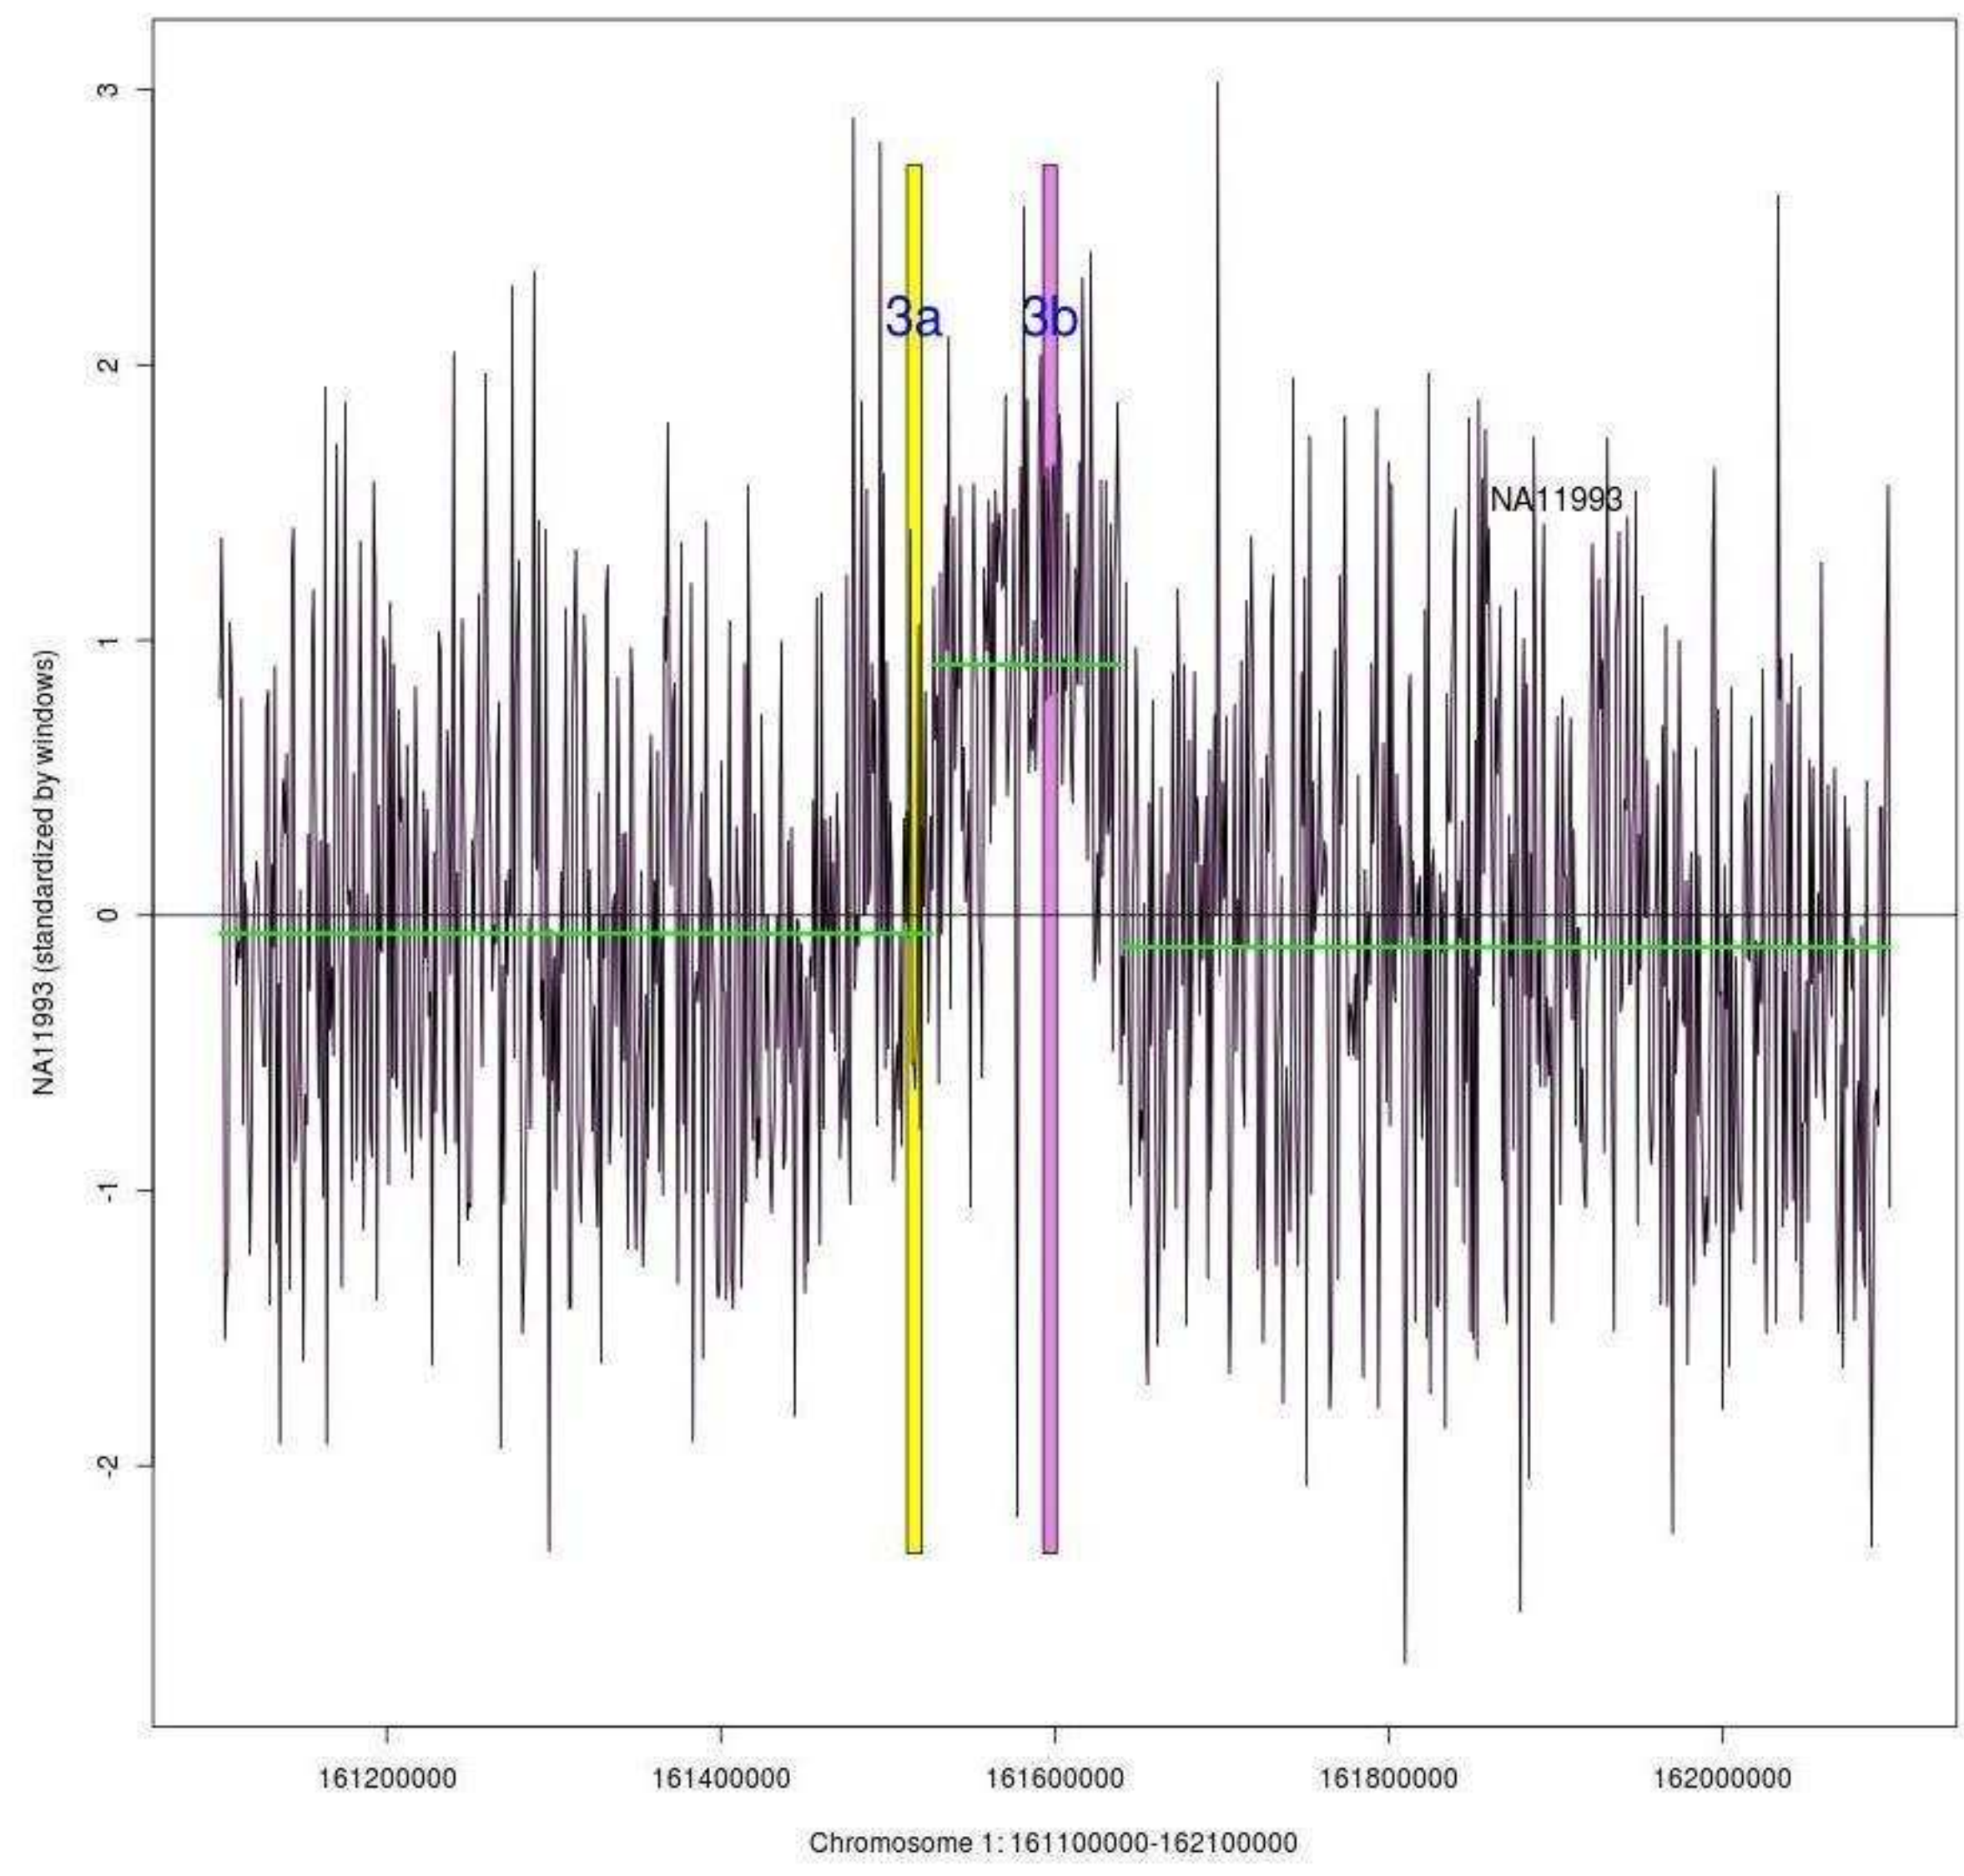

NA12003

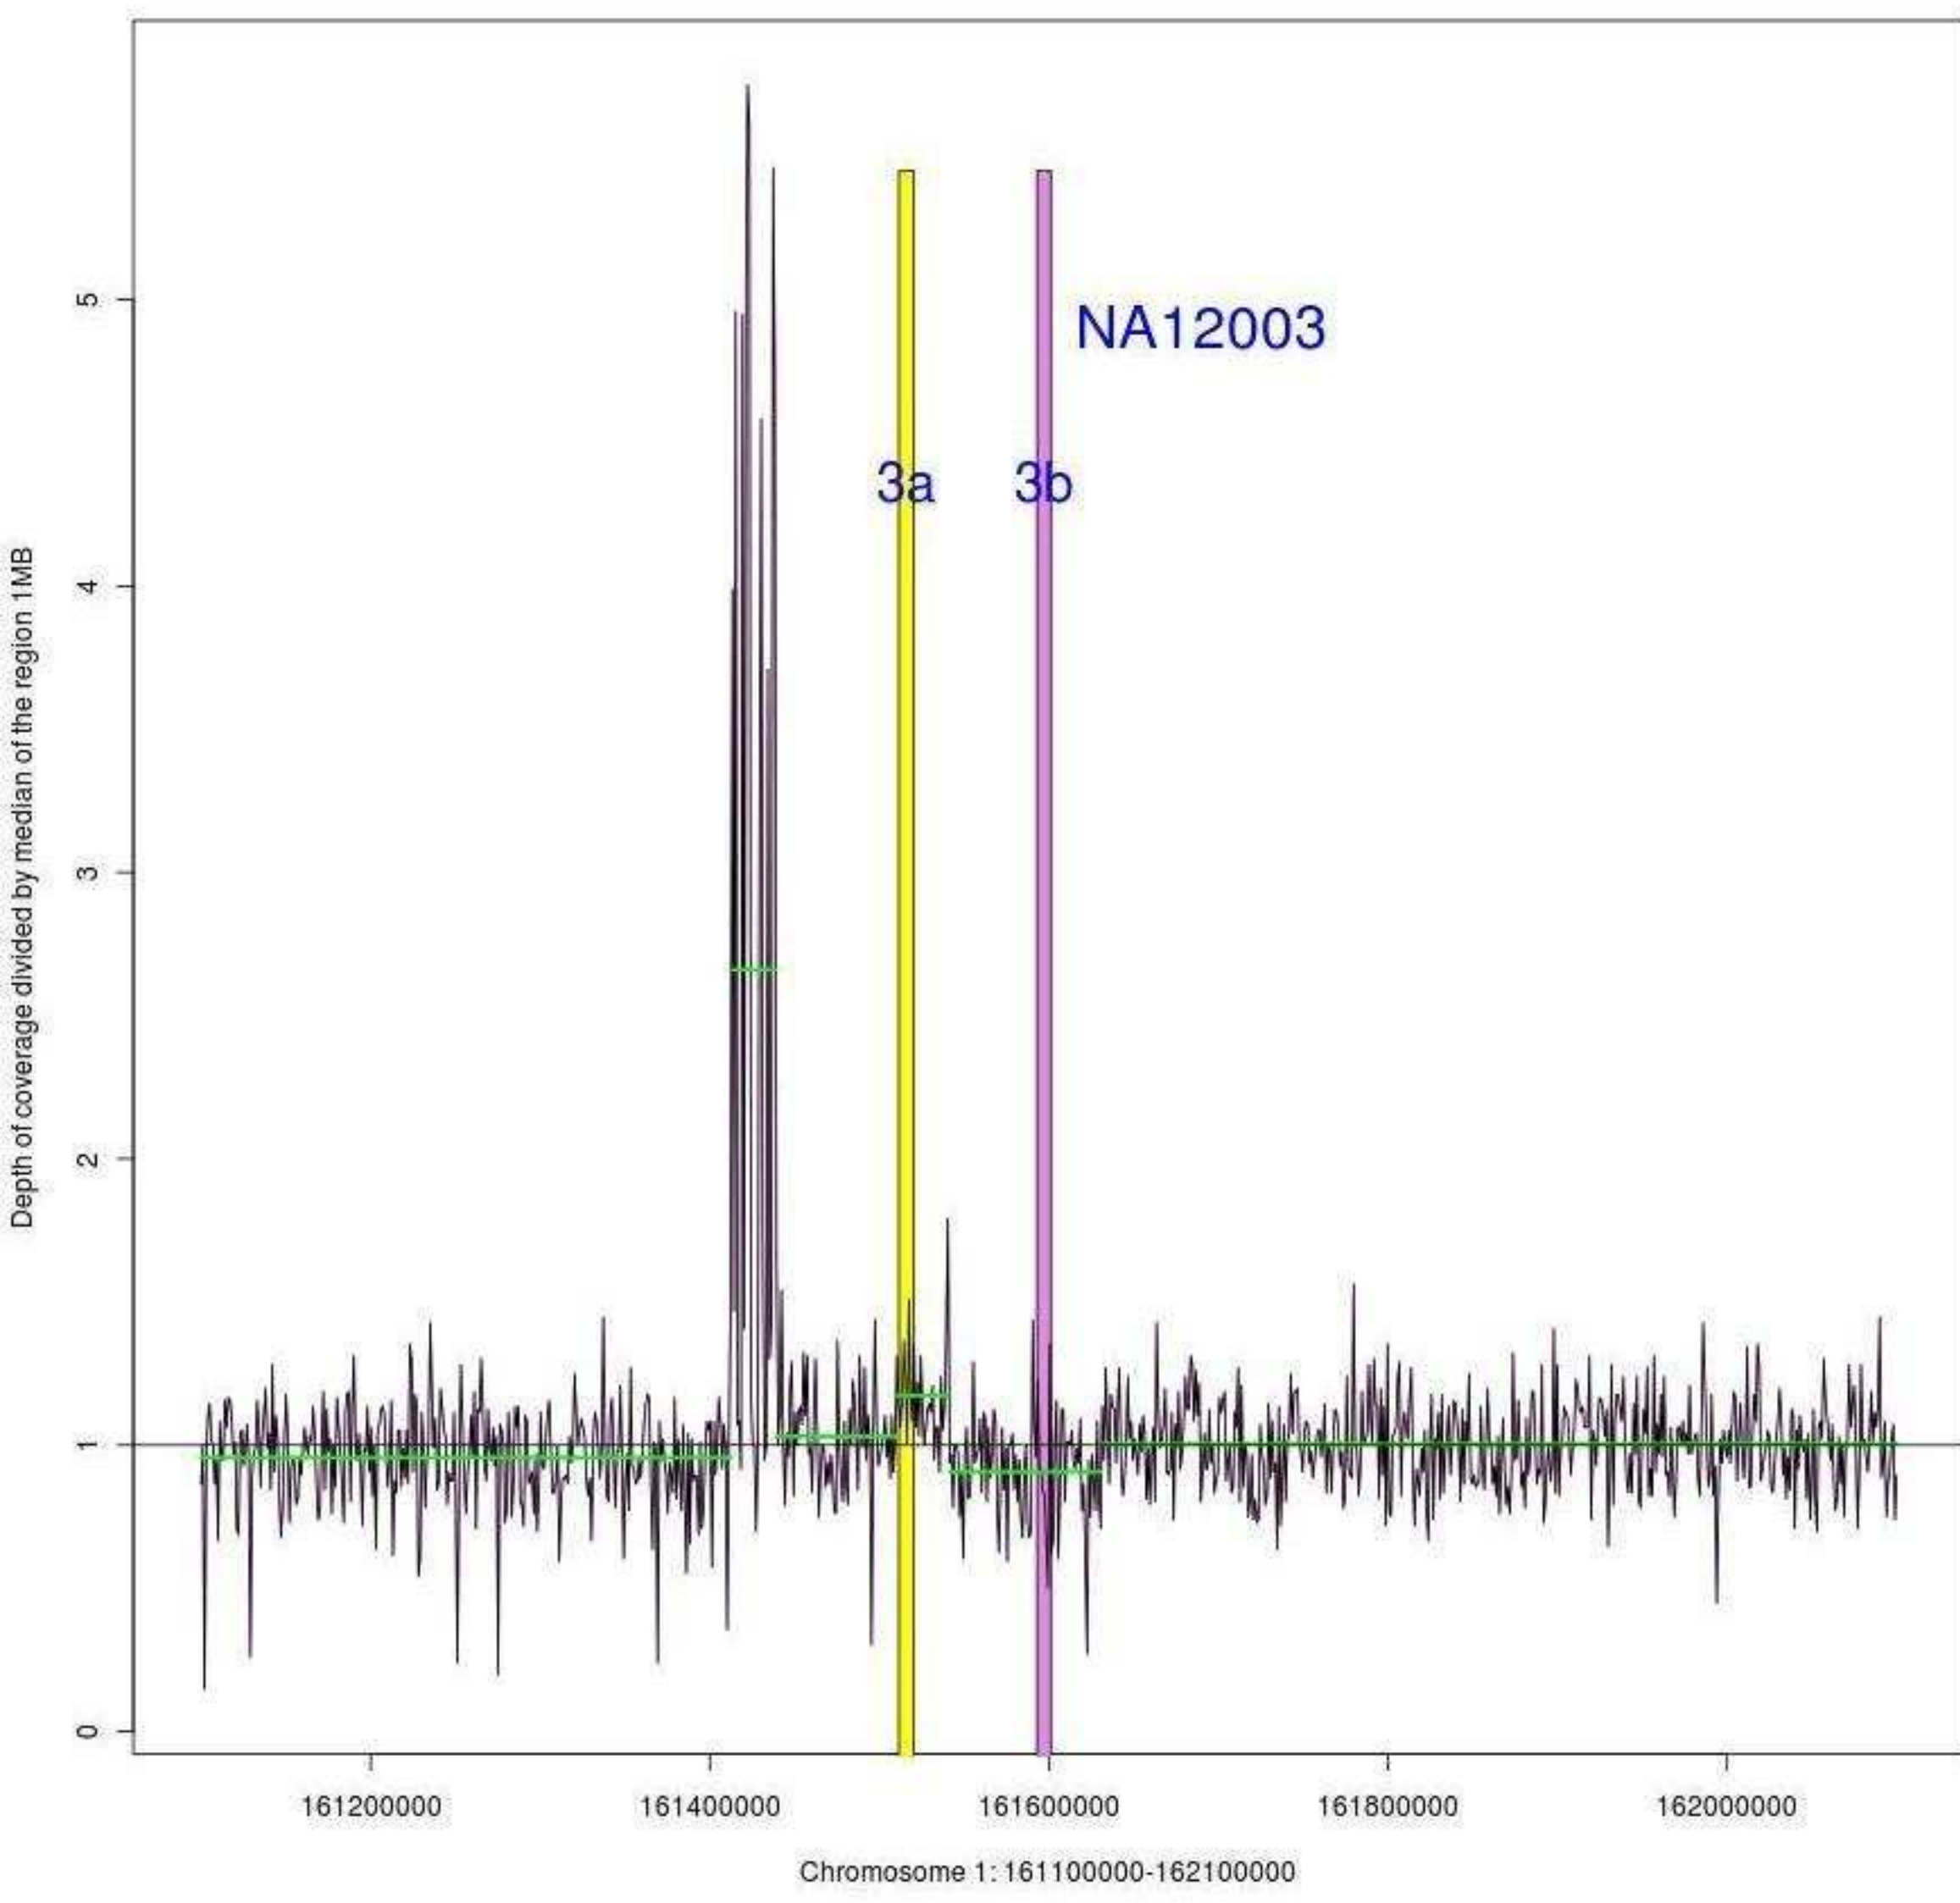

NA12003

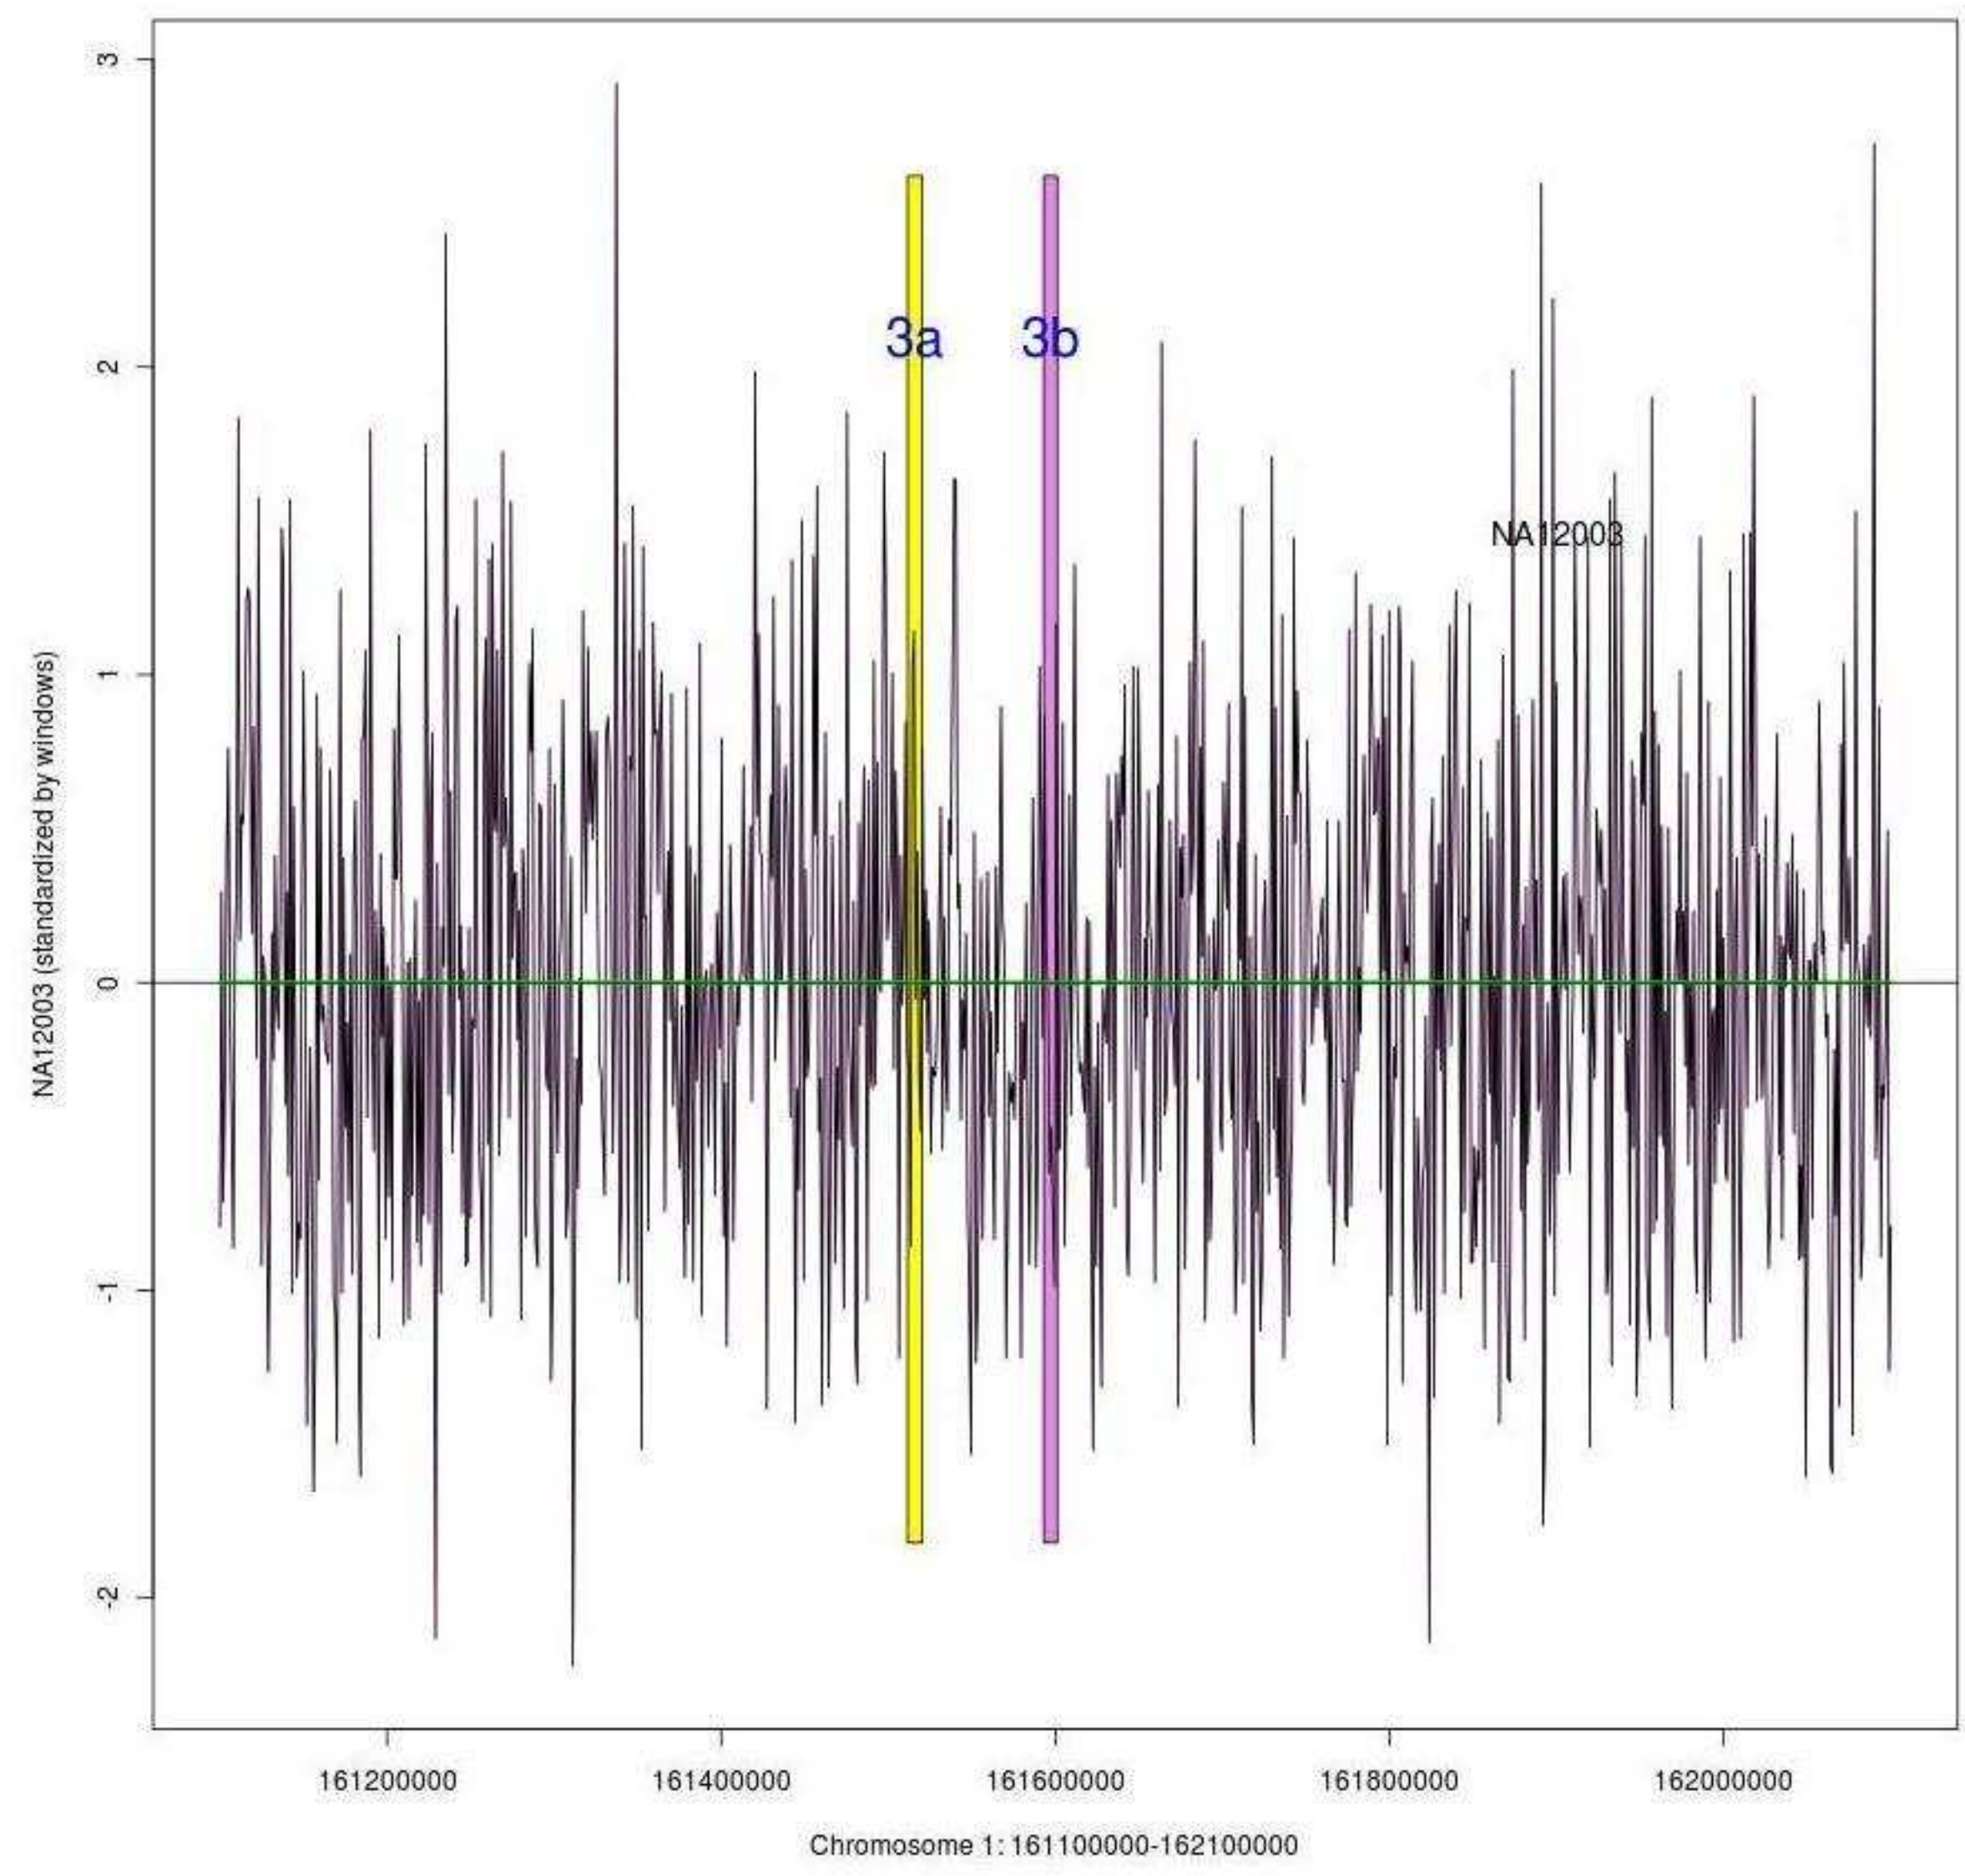

NA12004

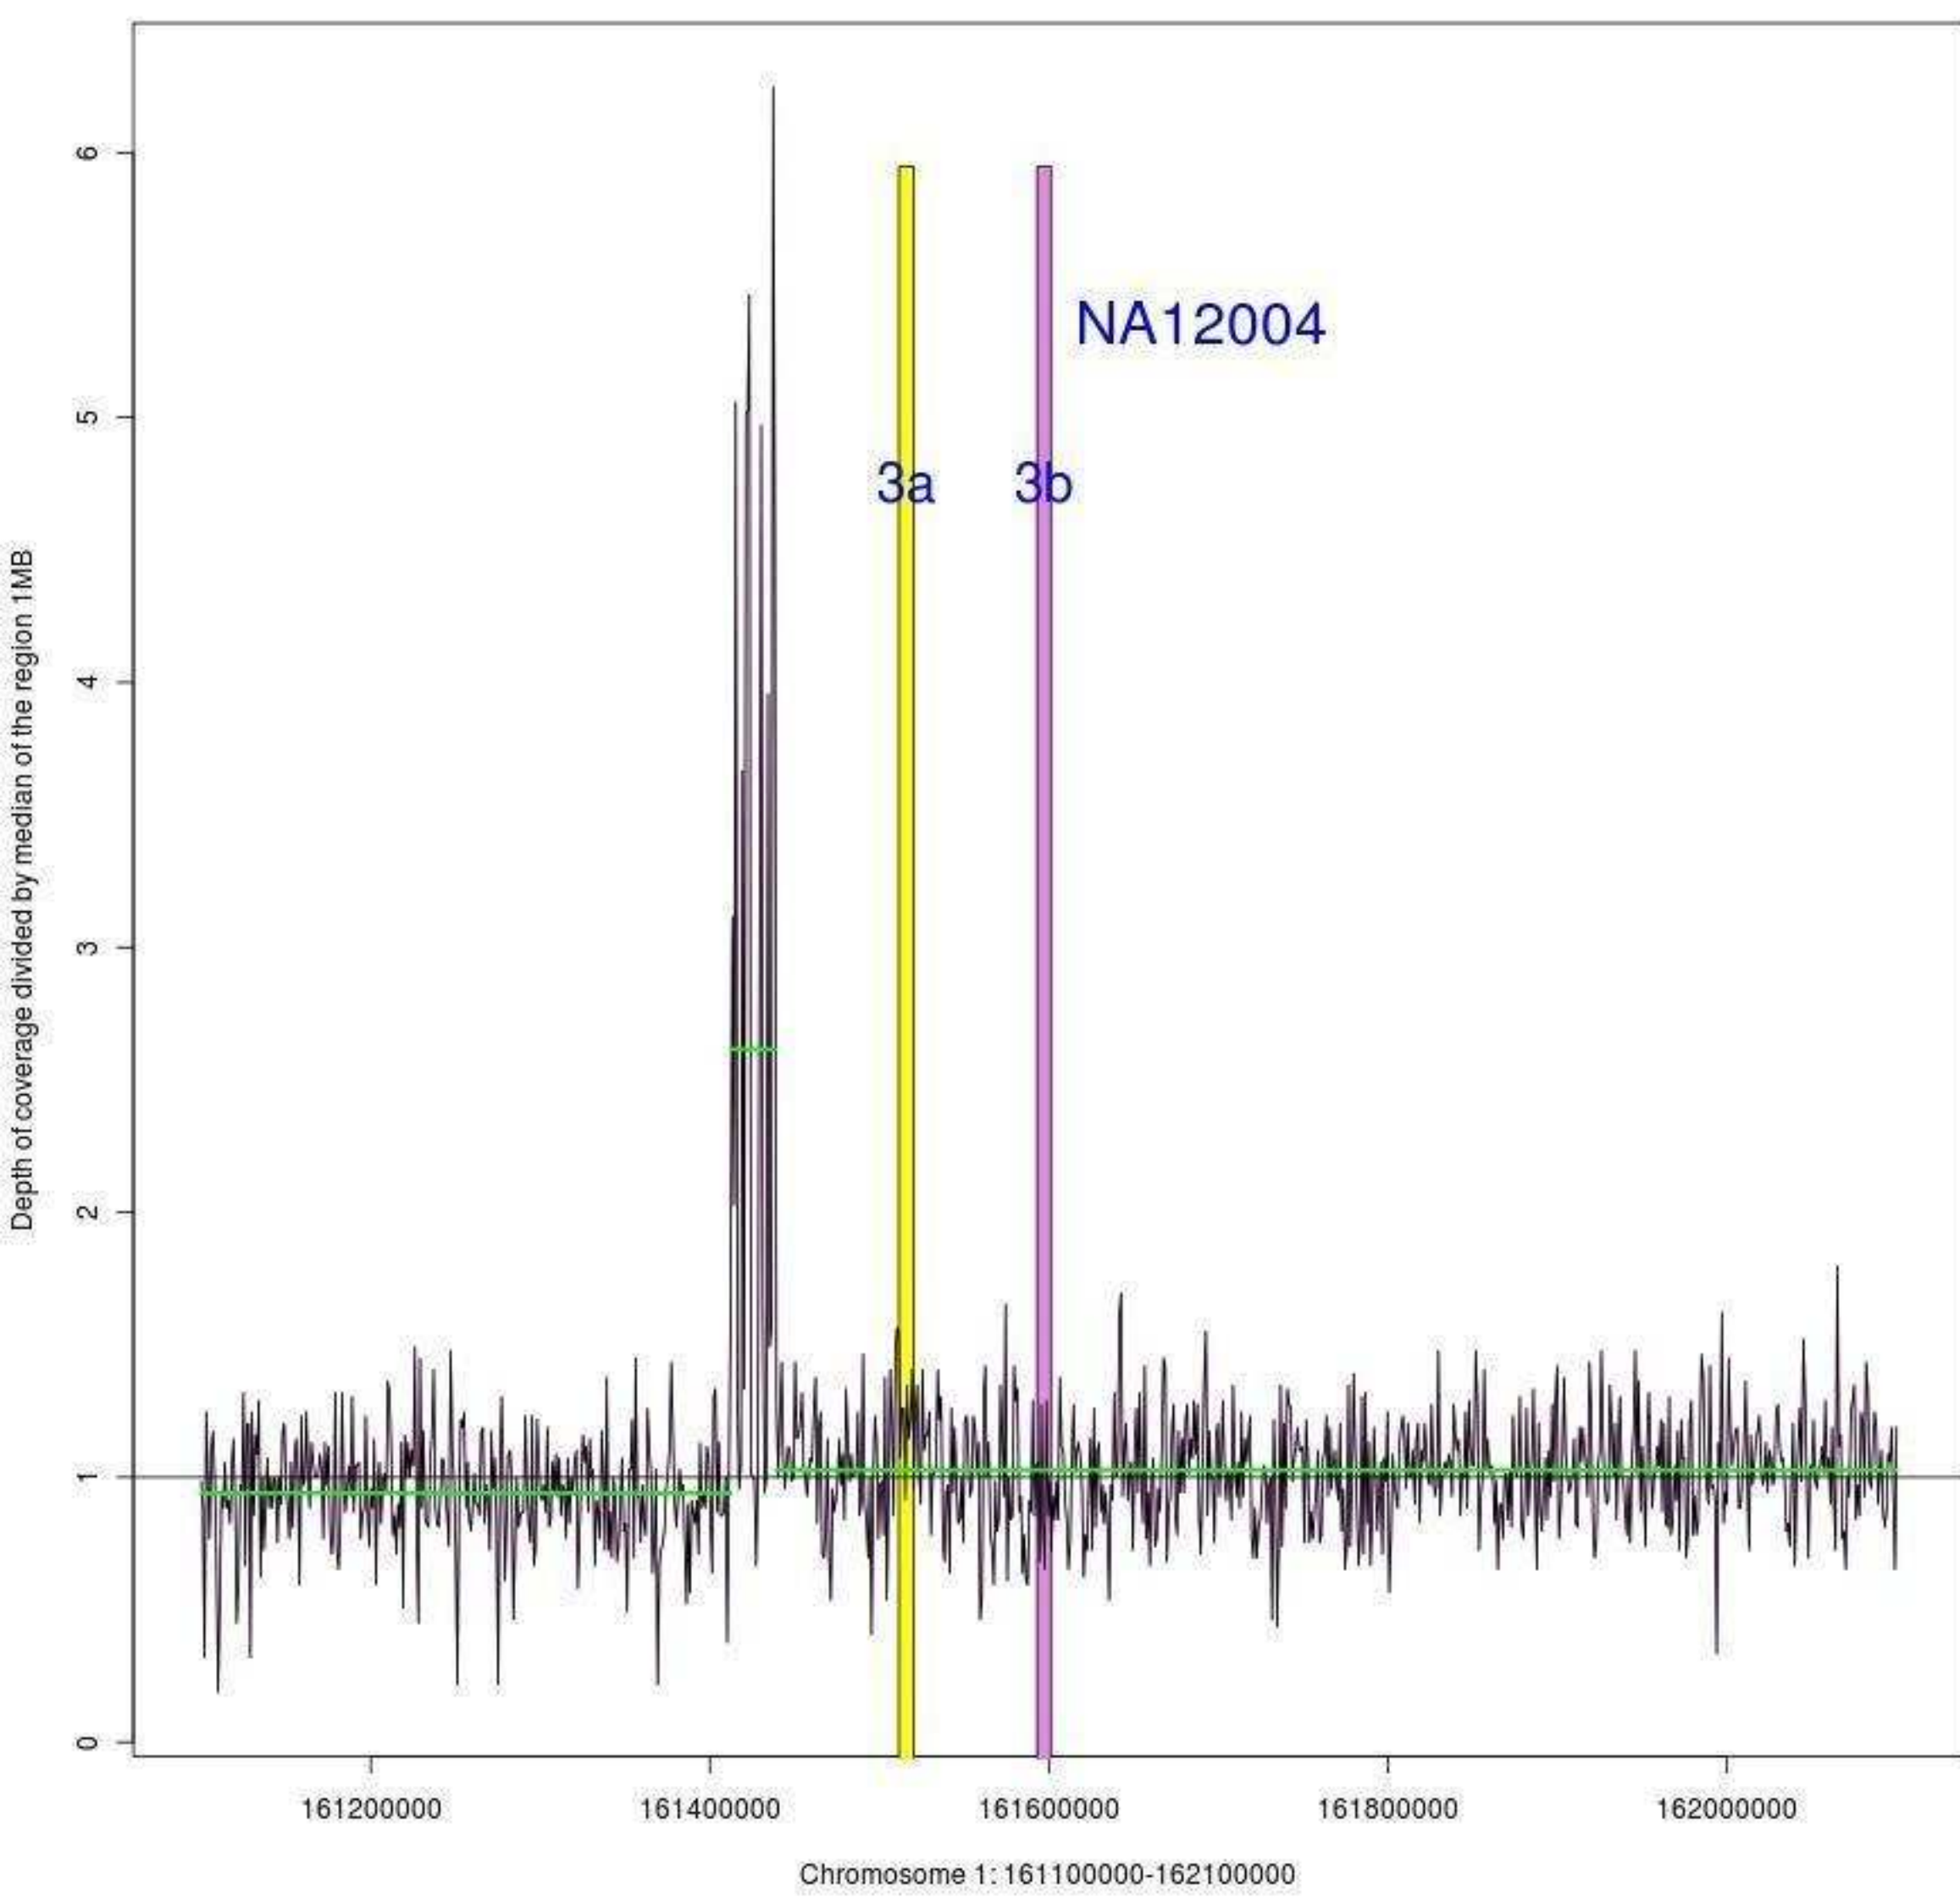

NA12004

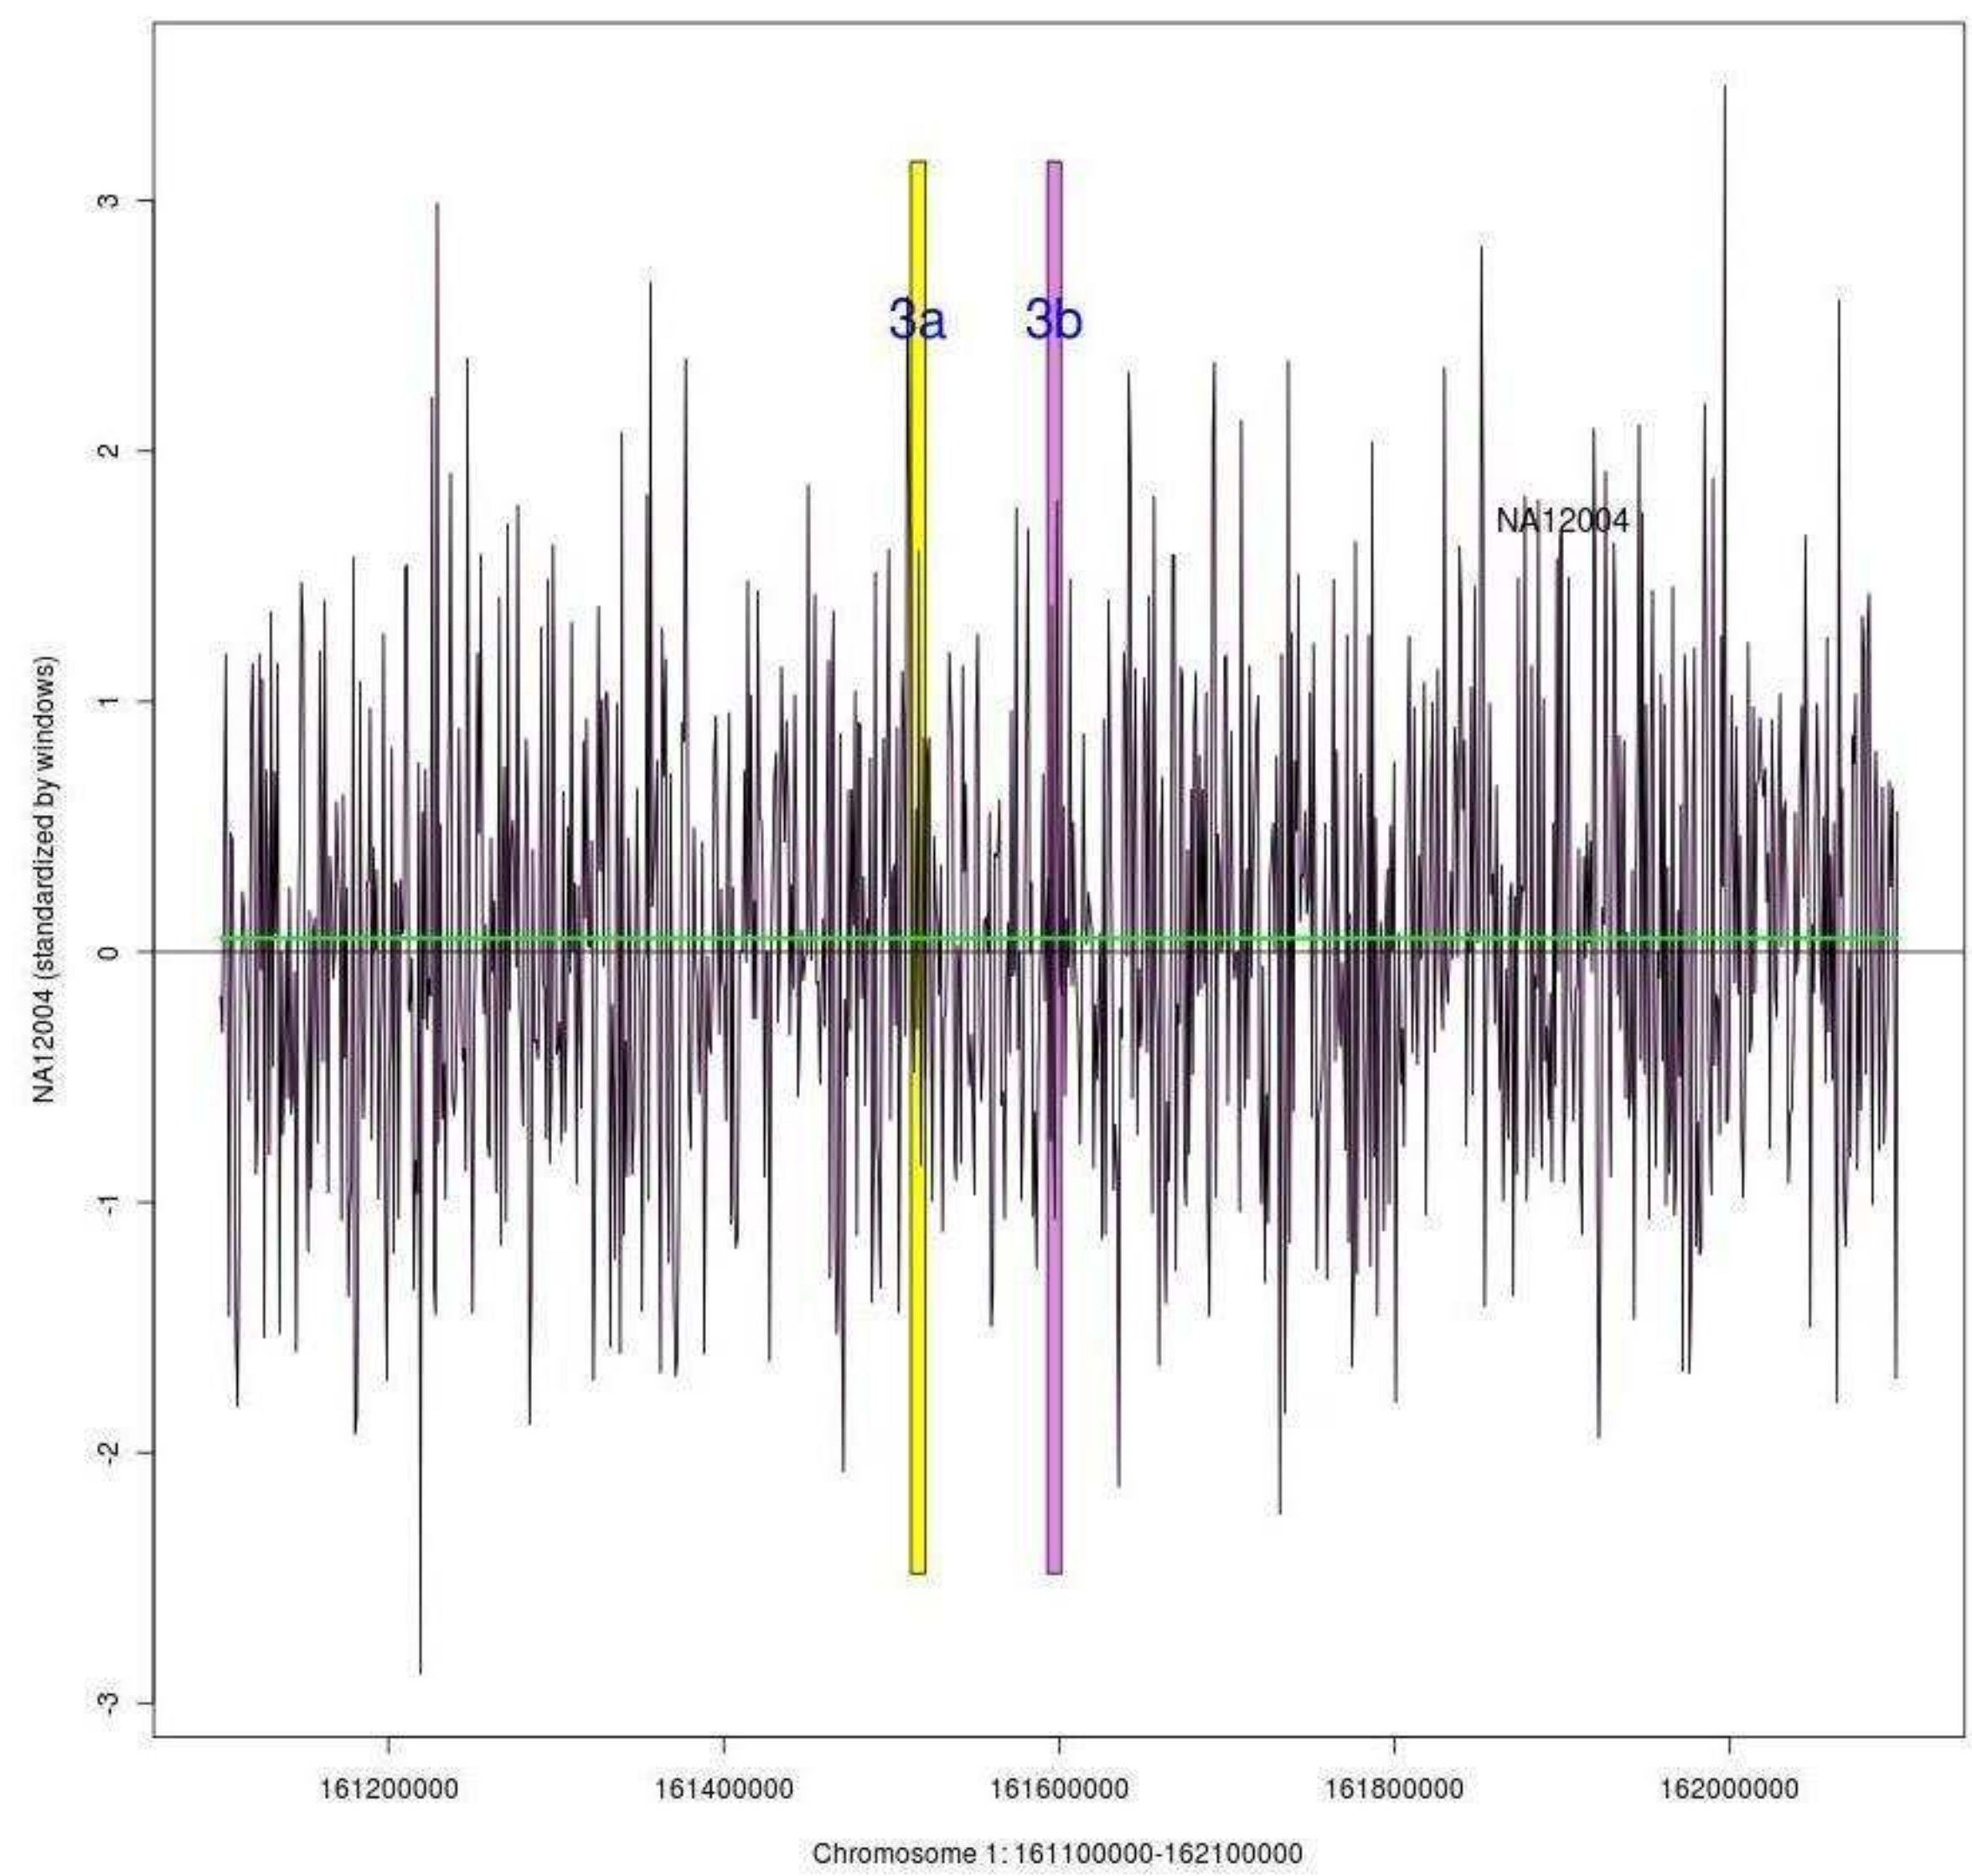



NA12717

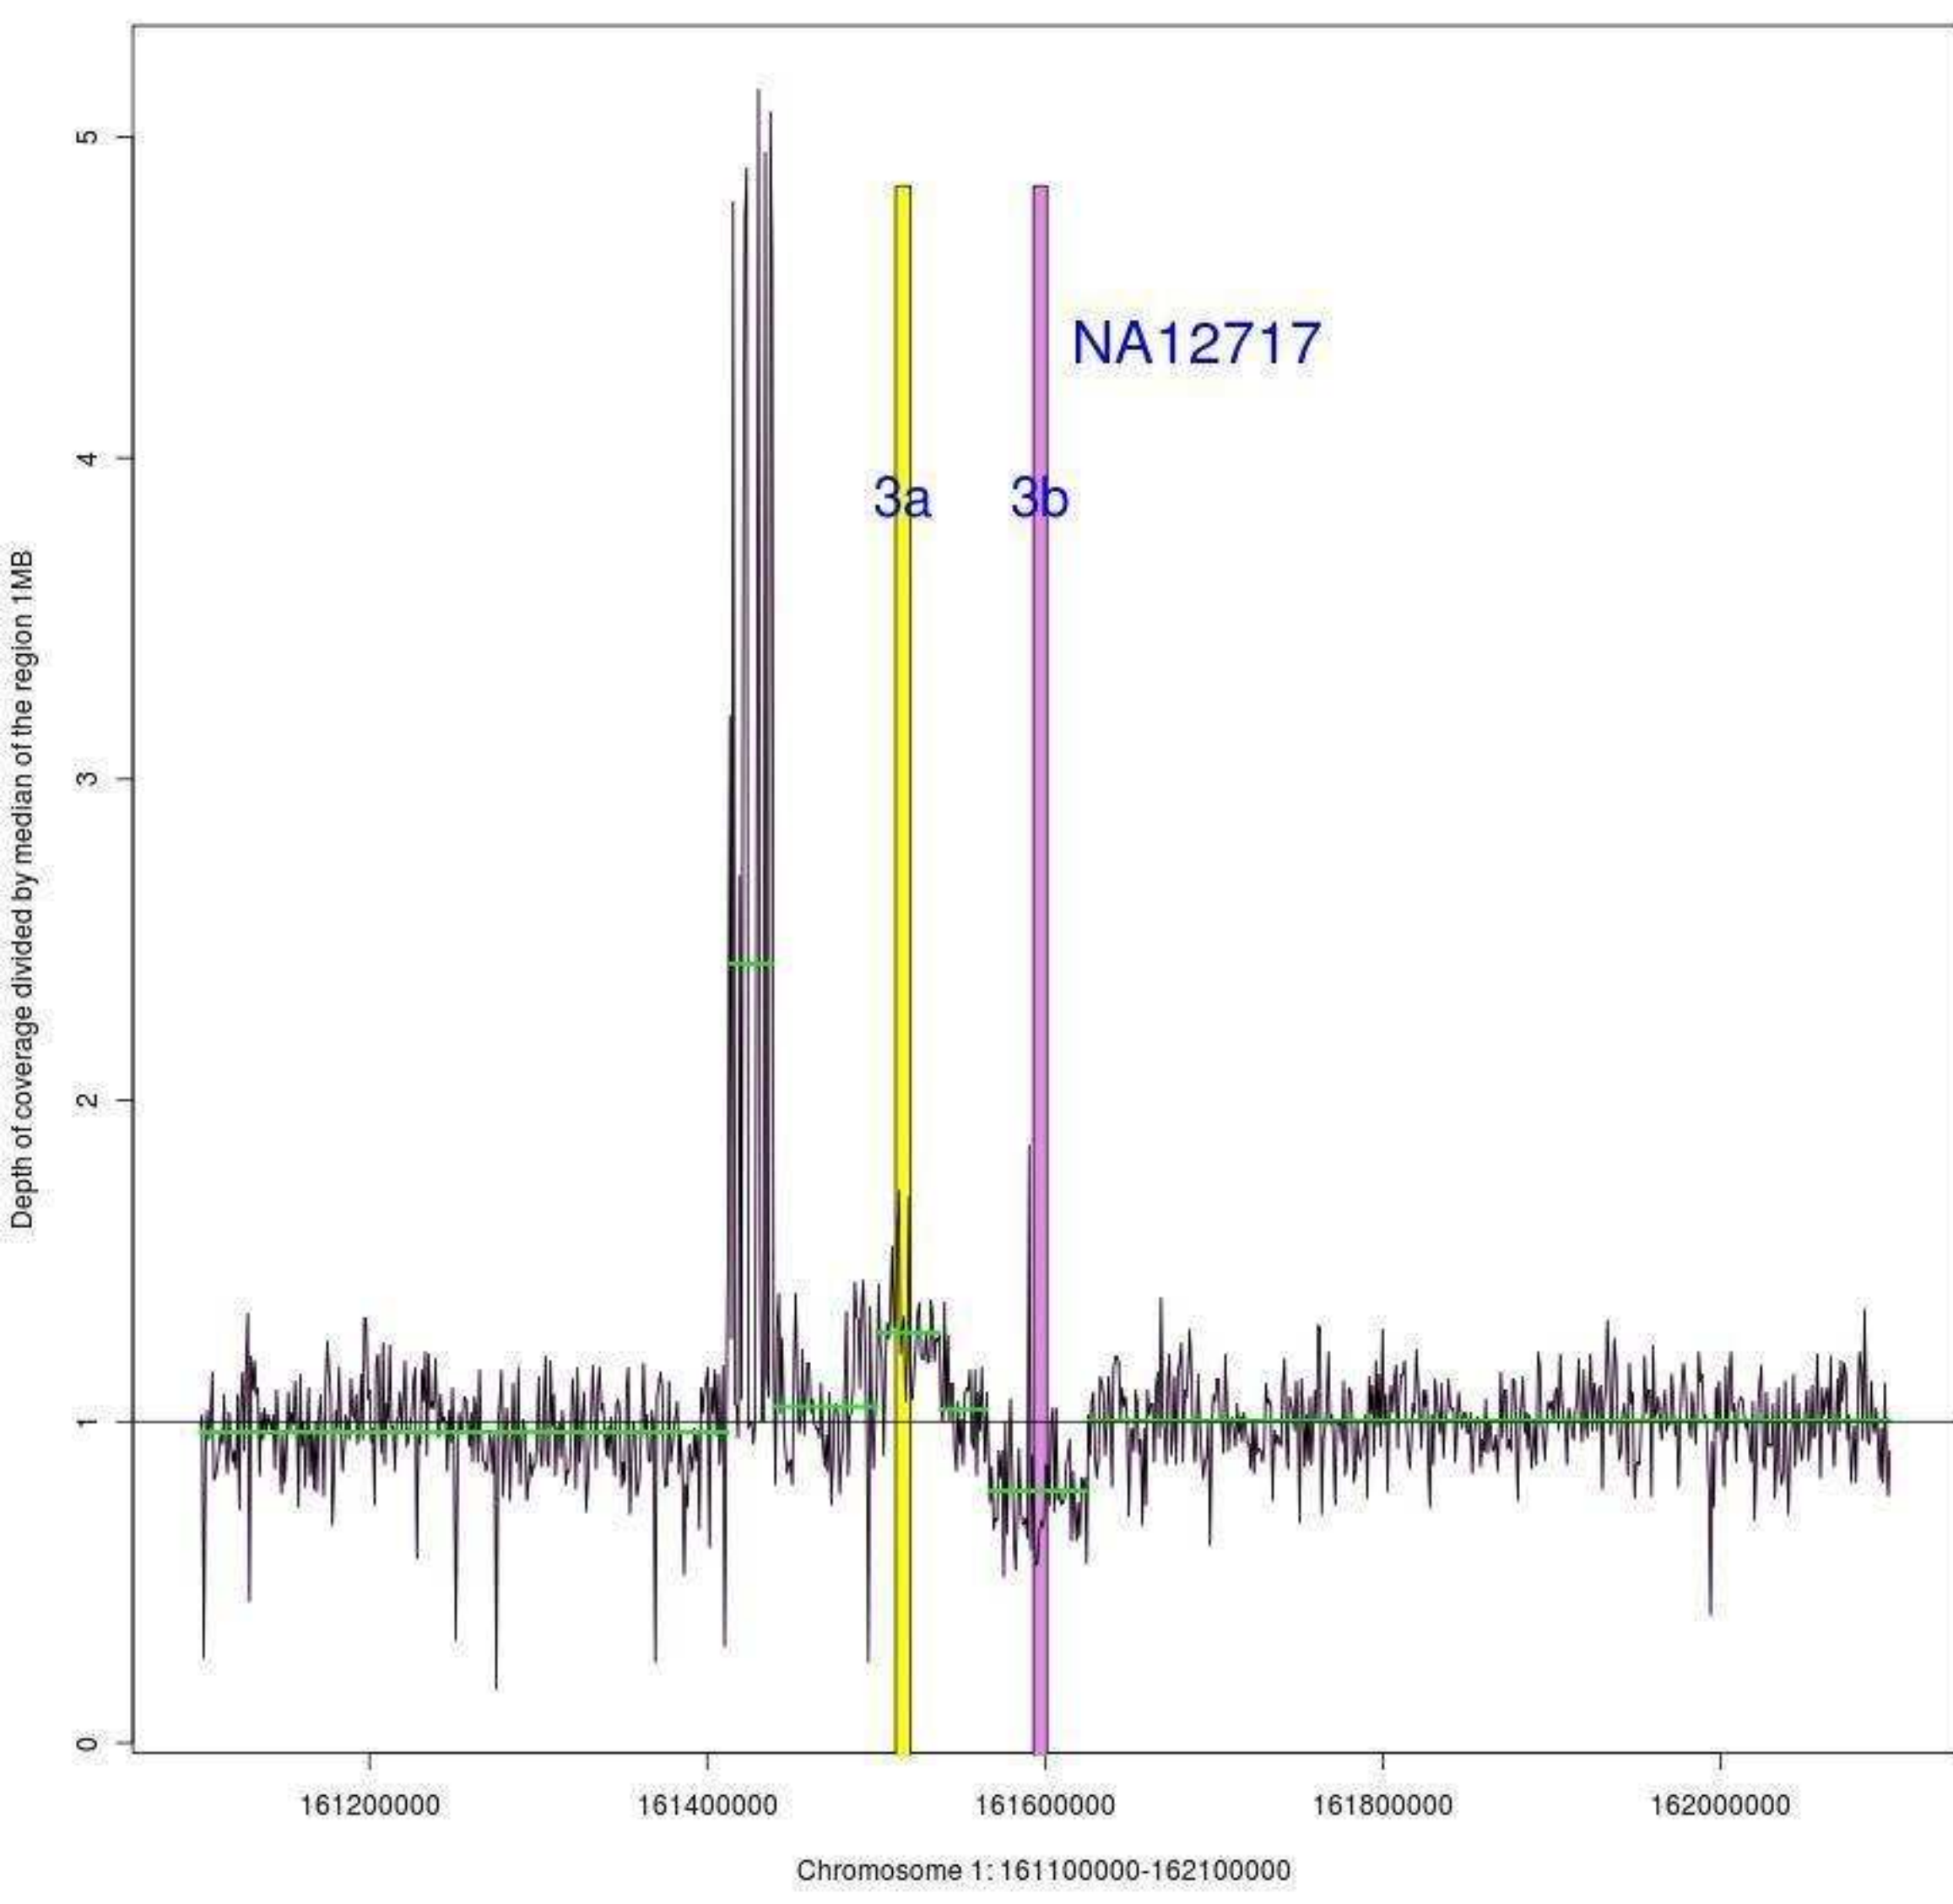

NA12717

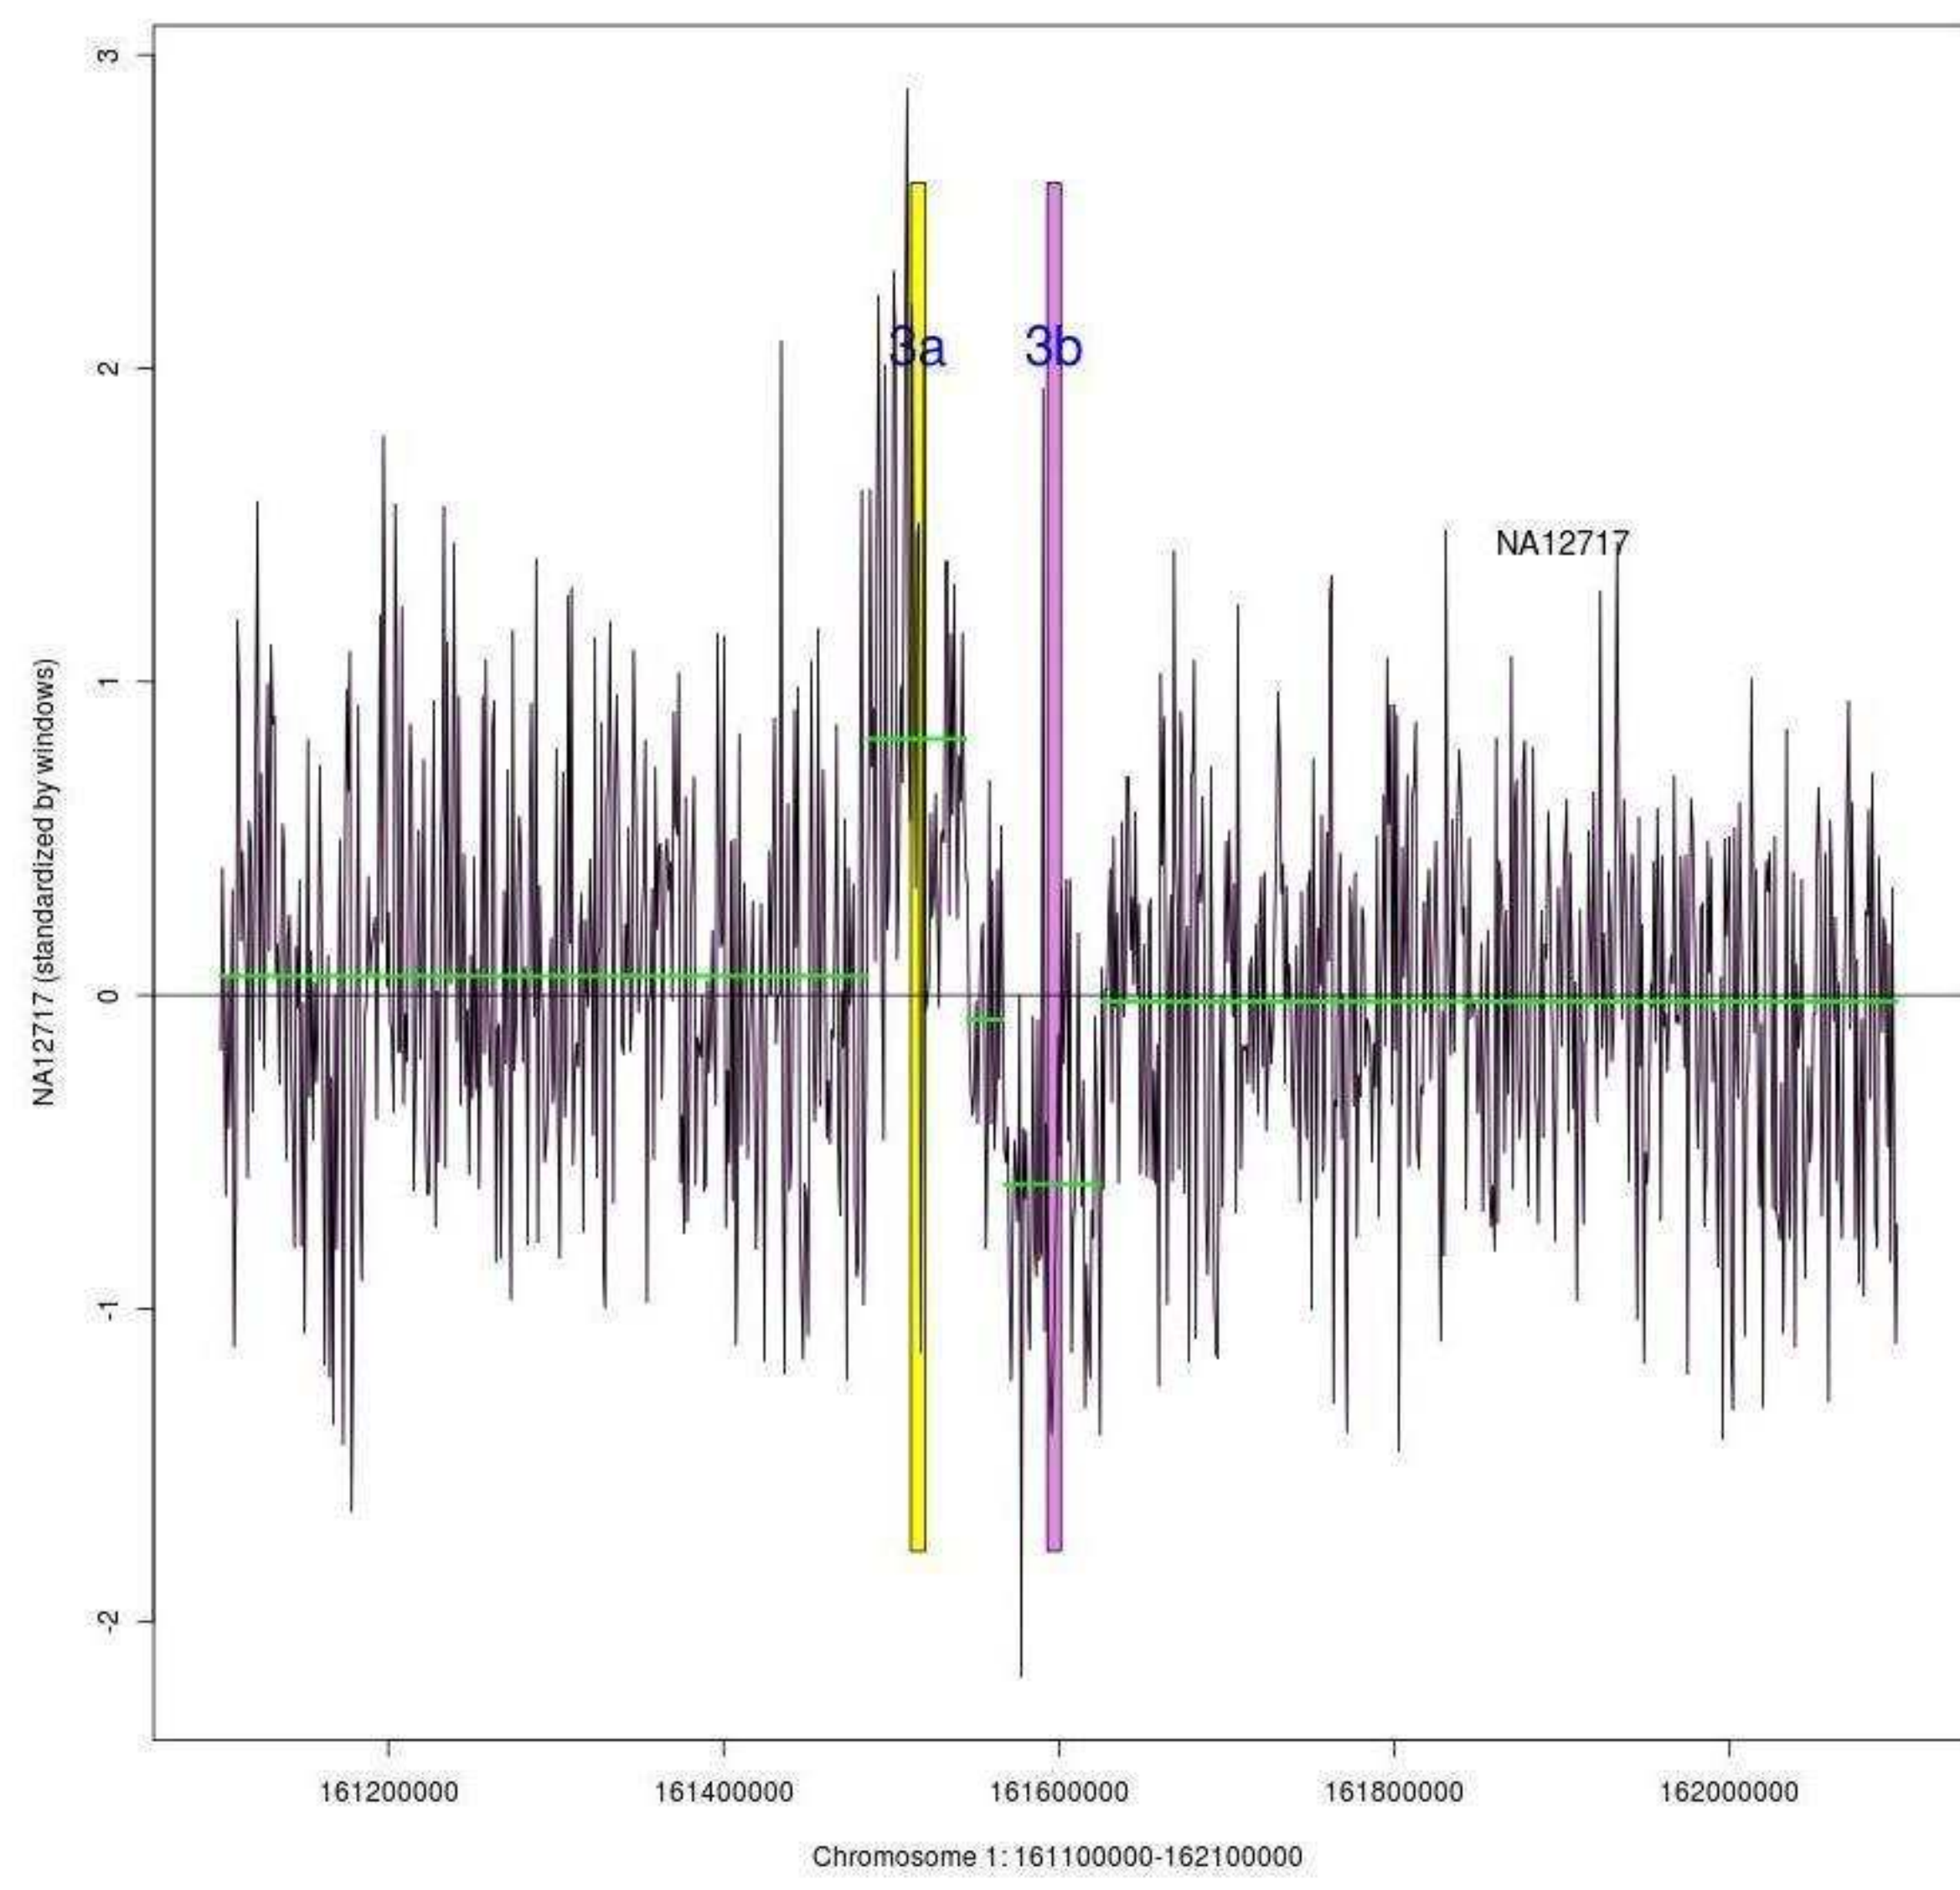

NA12750

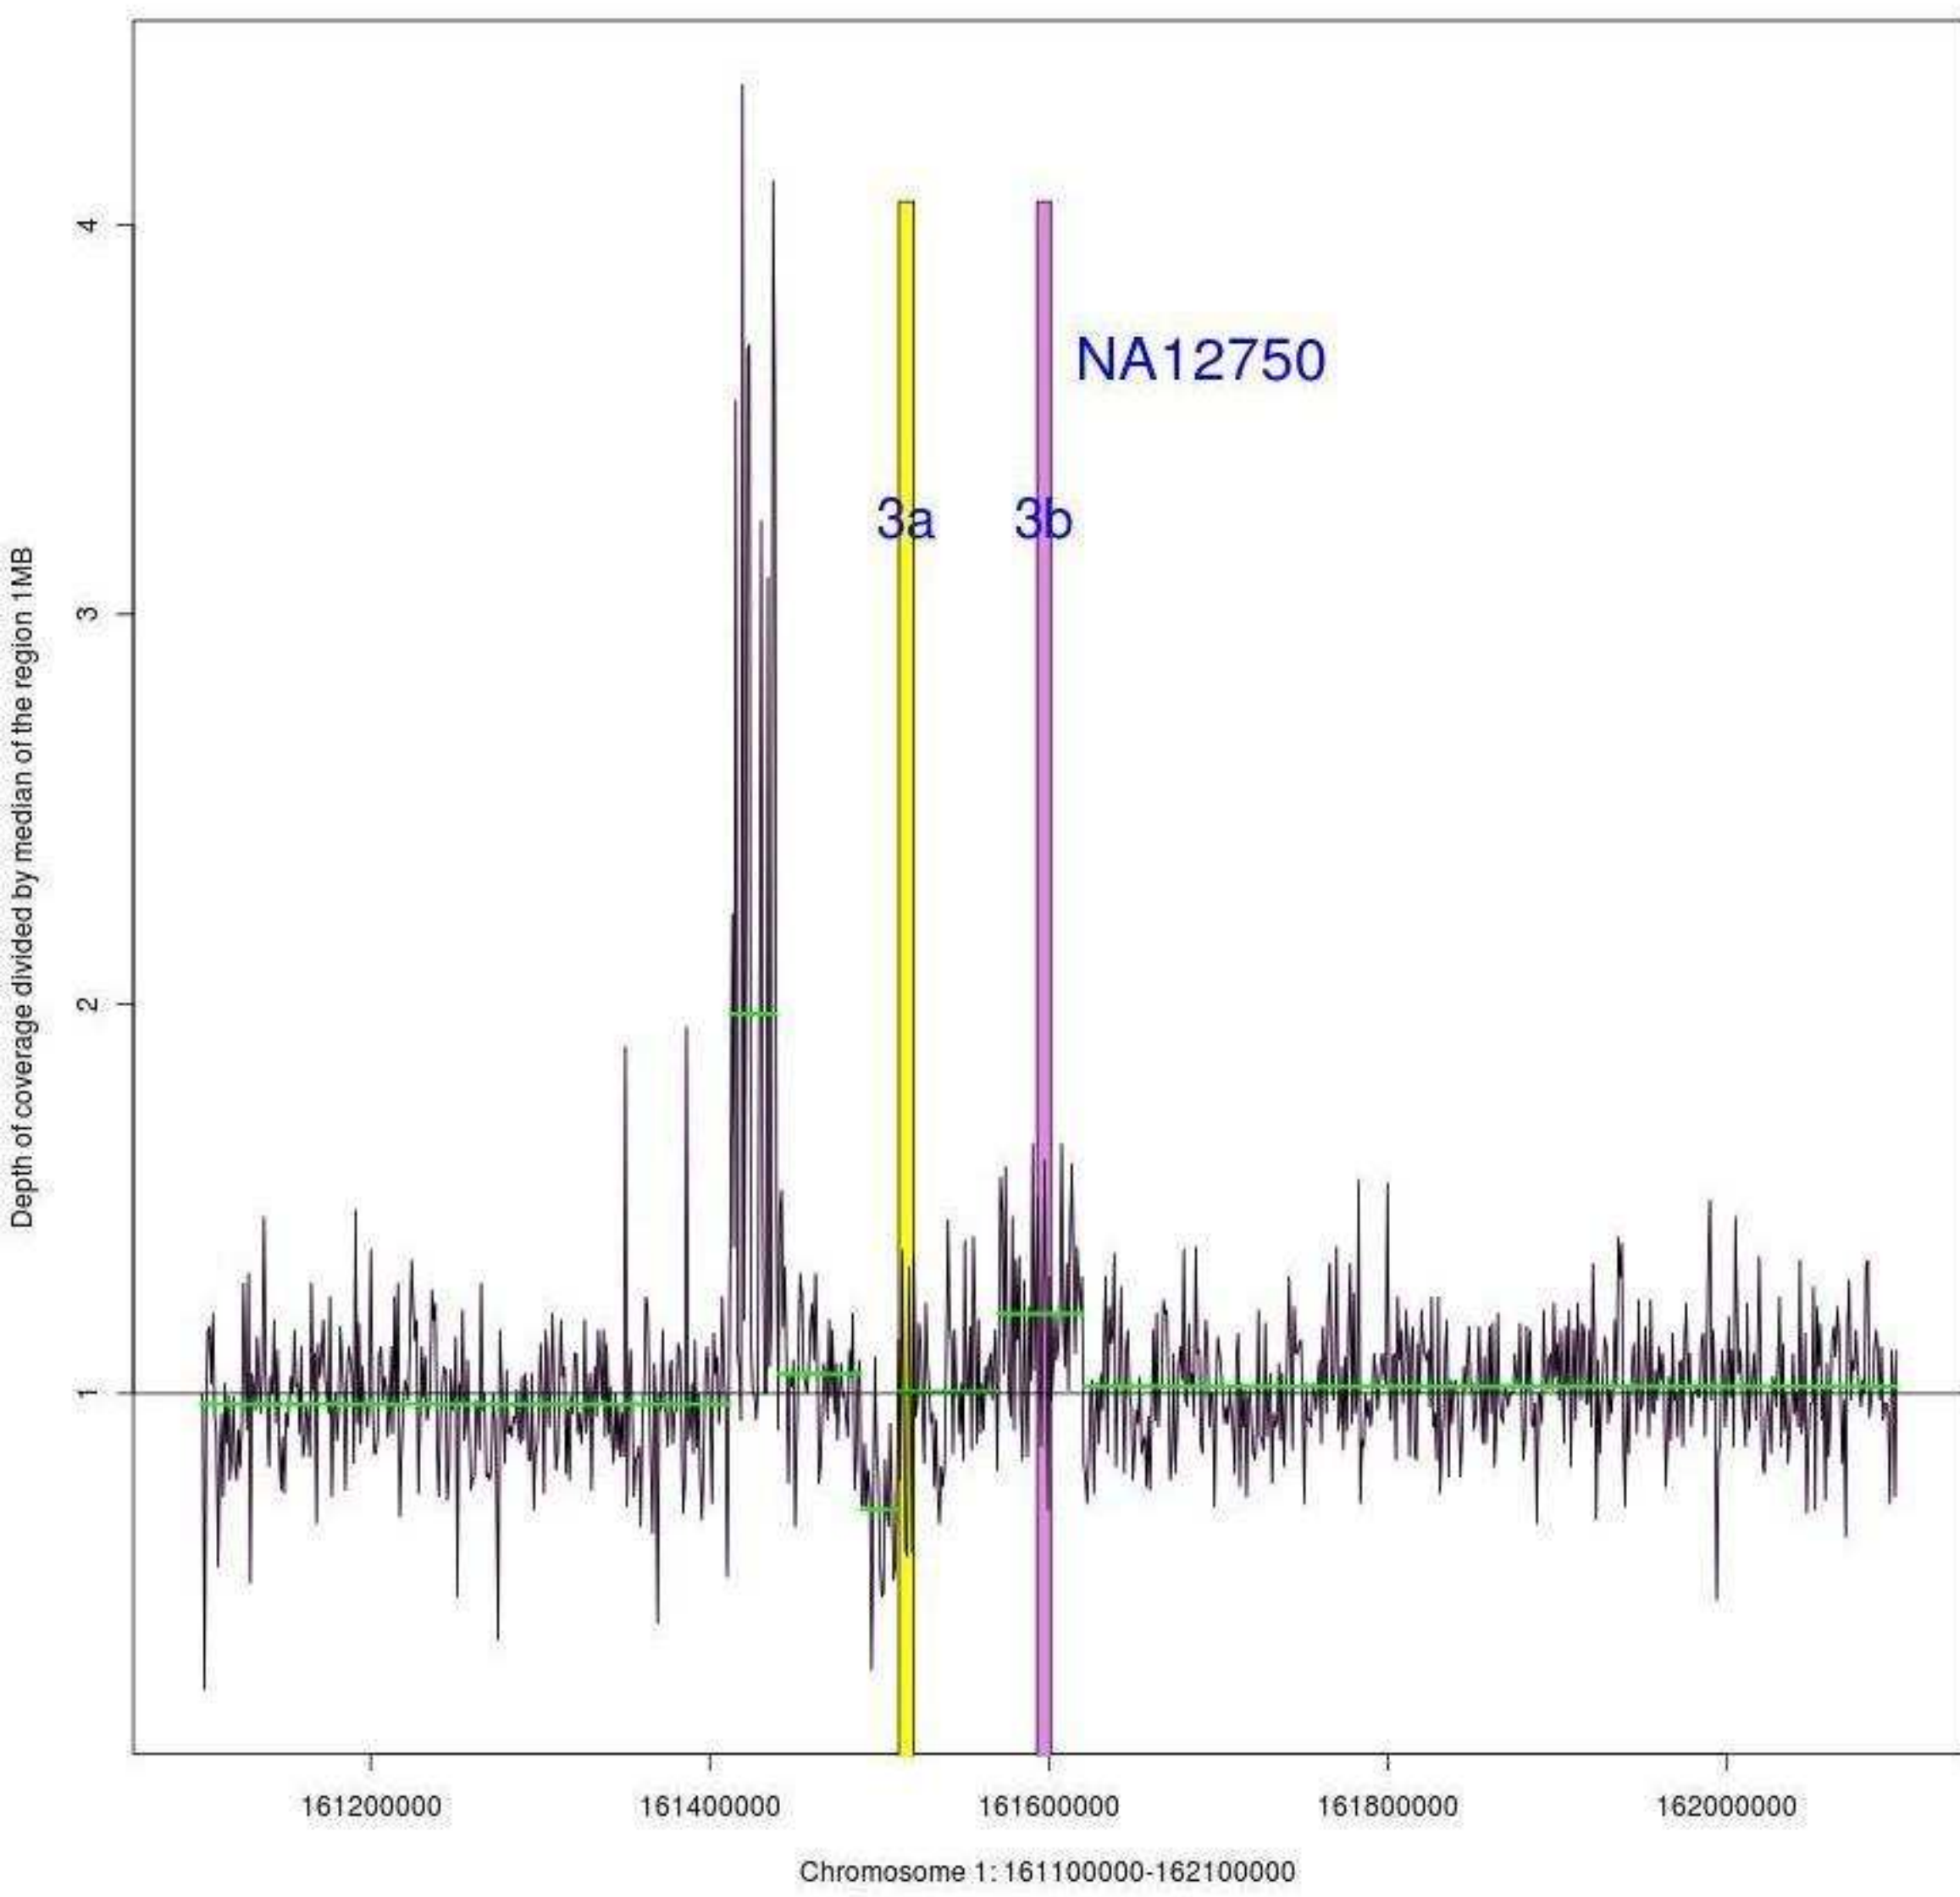

NA12750

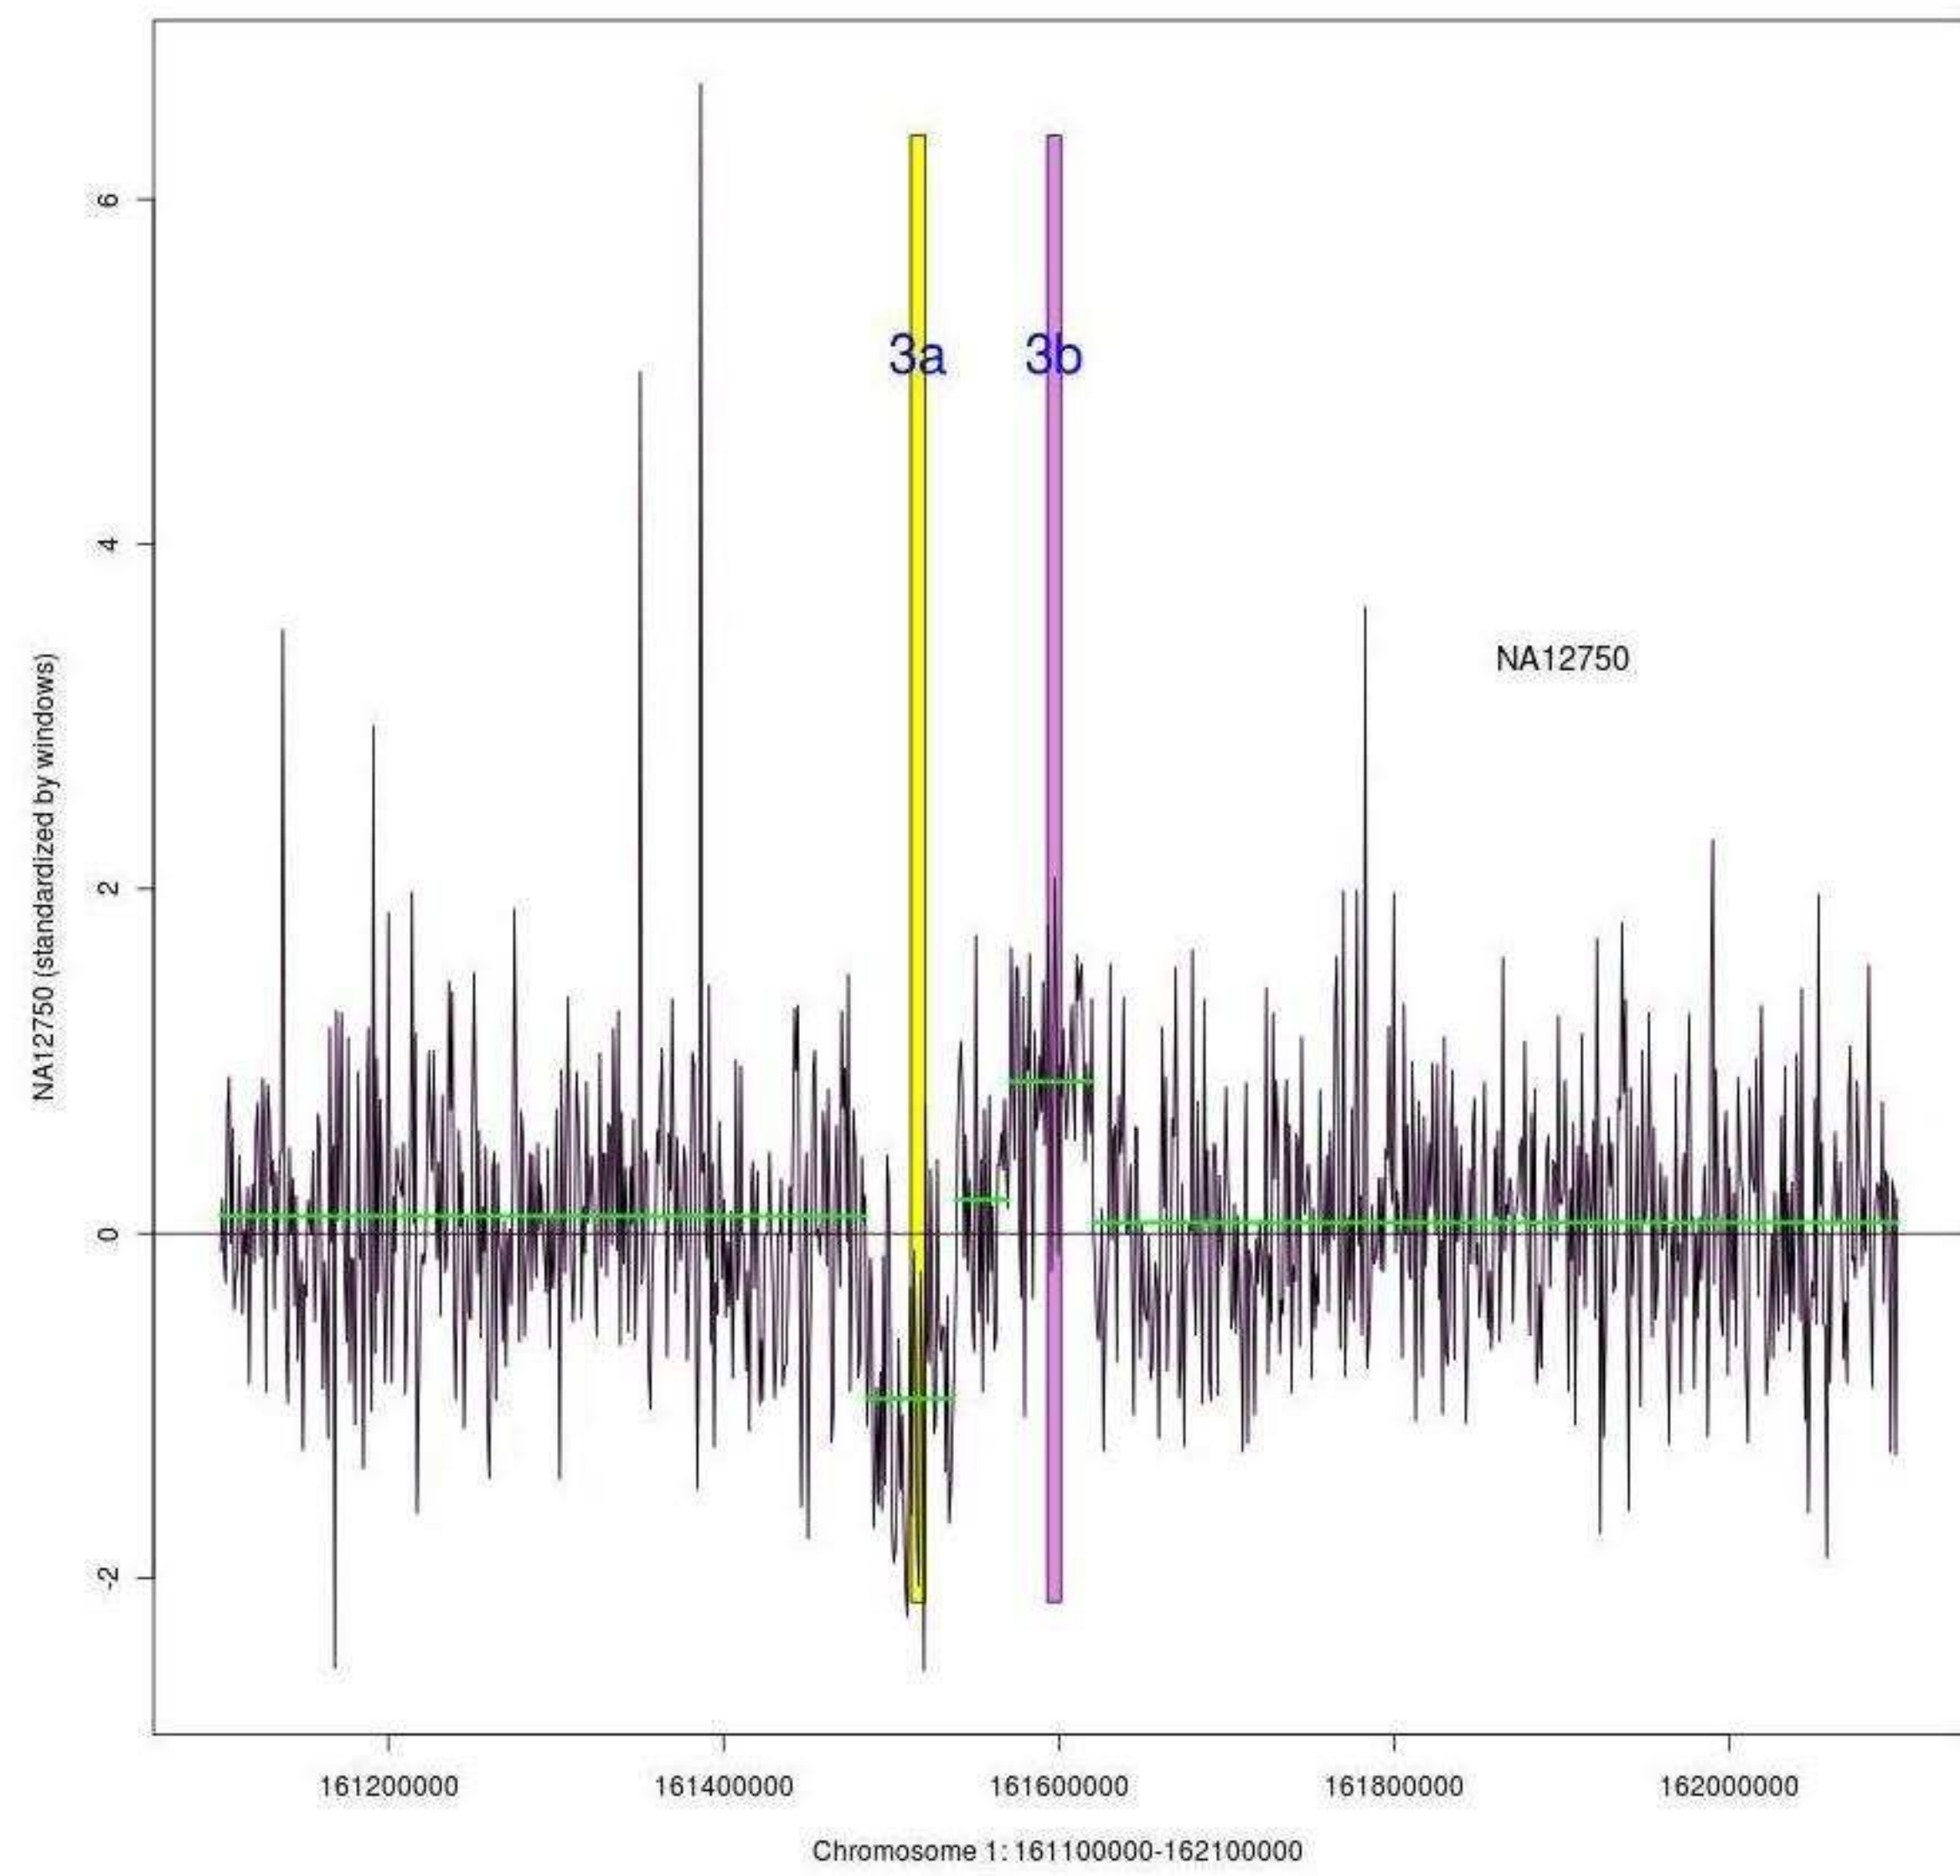

NA12761

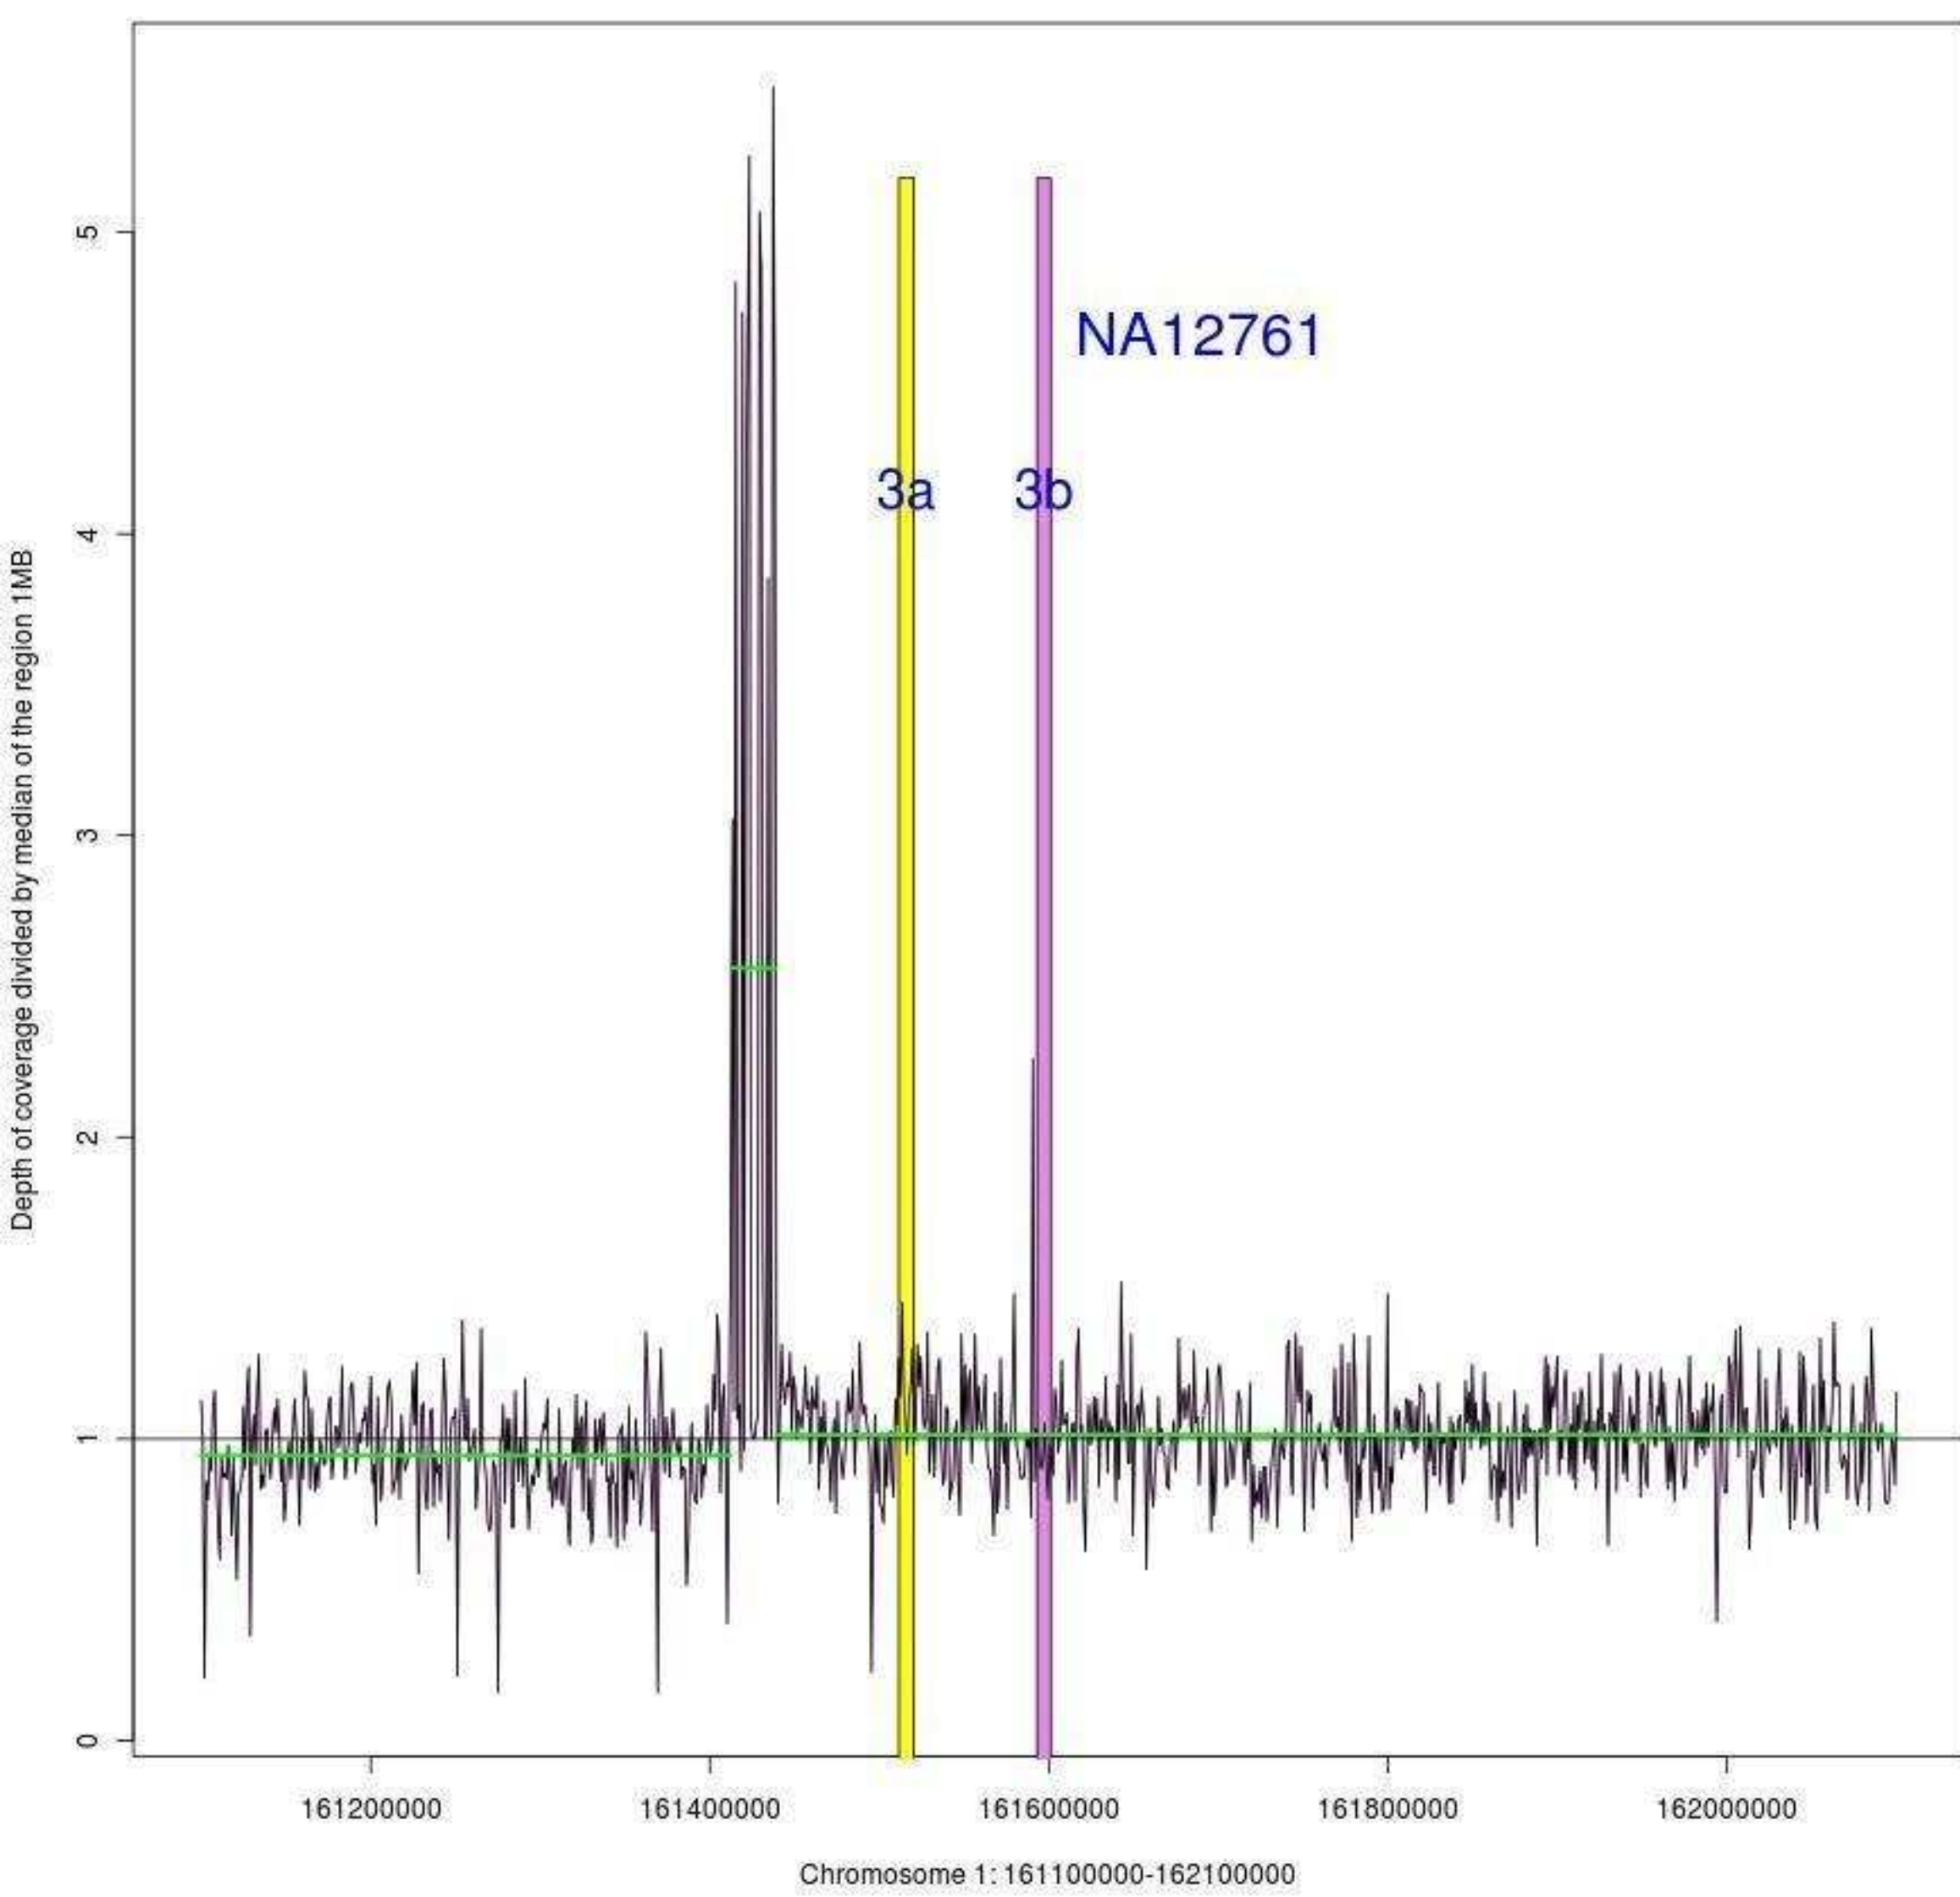

NA12761

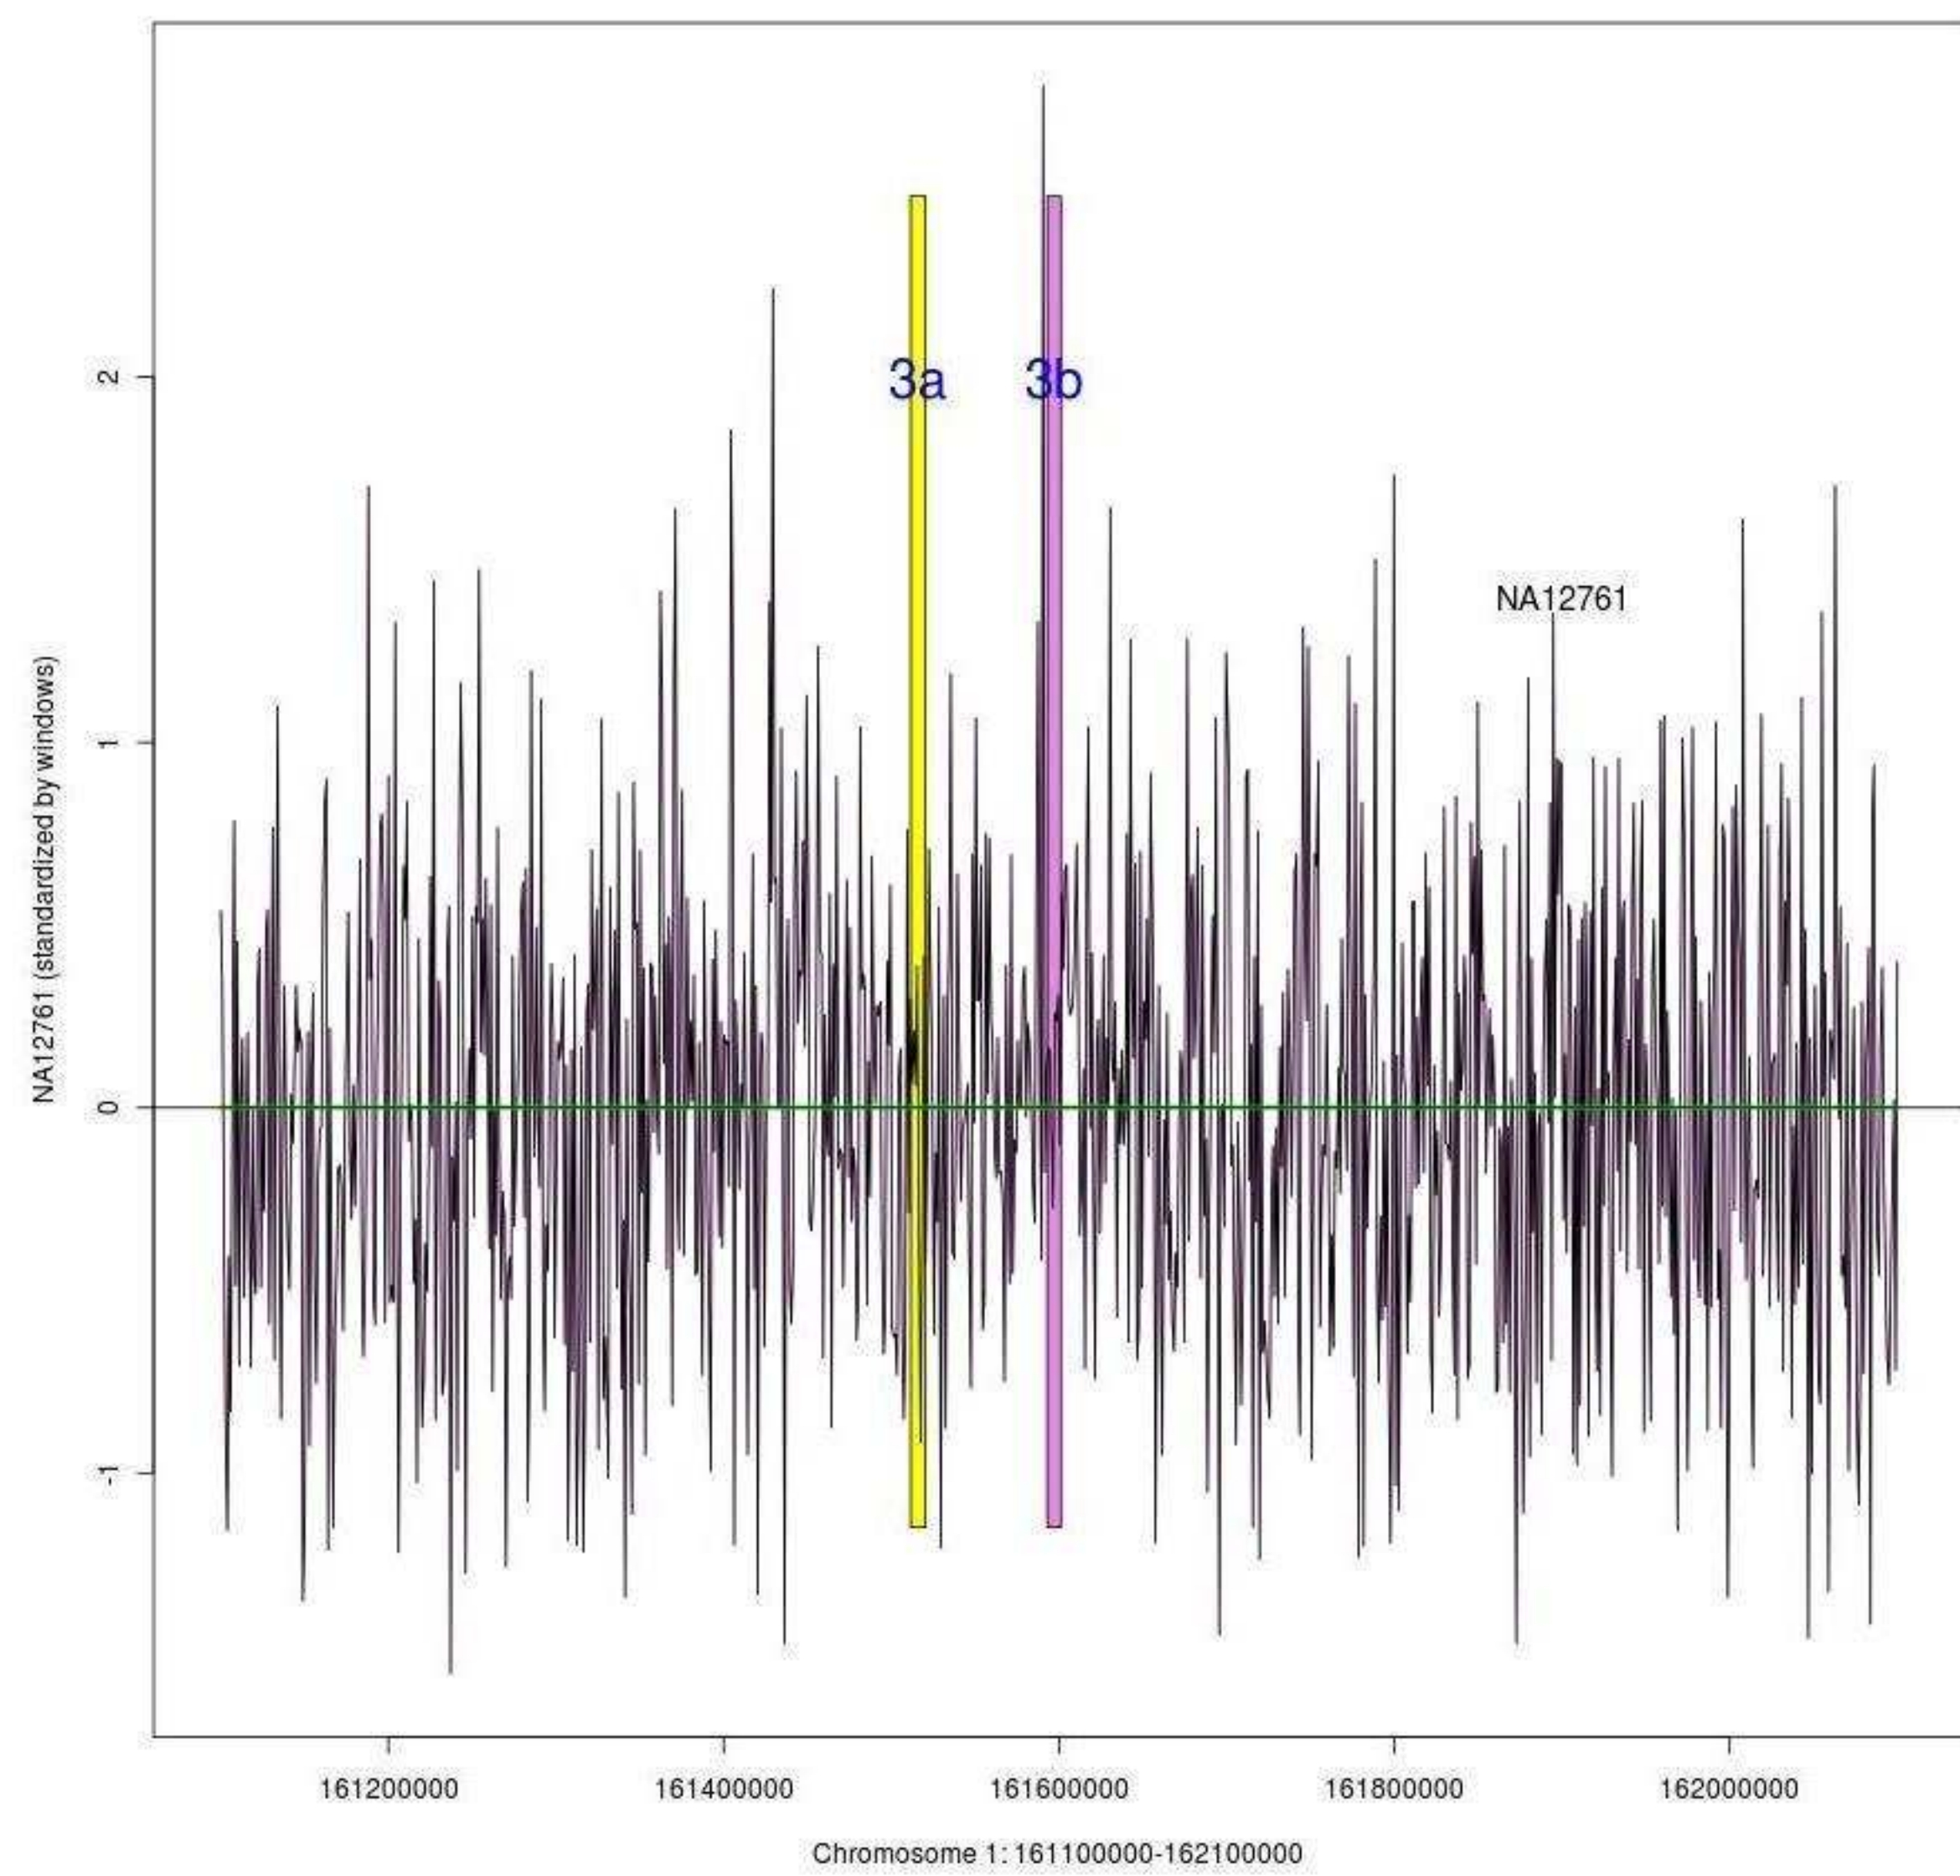



NA18504

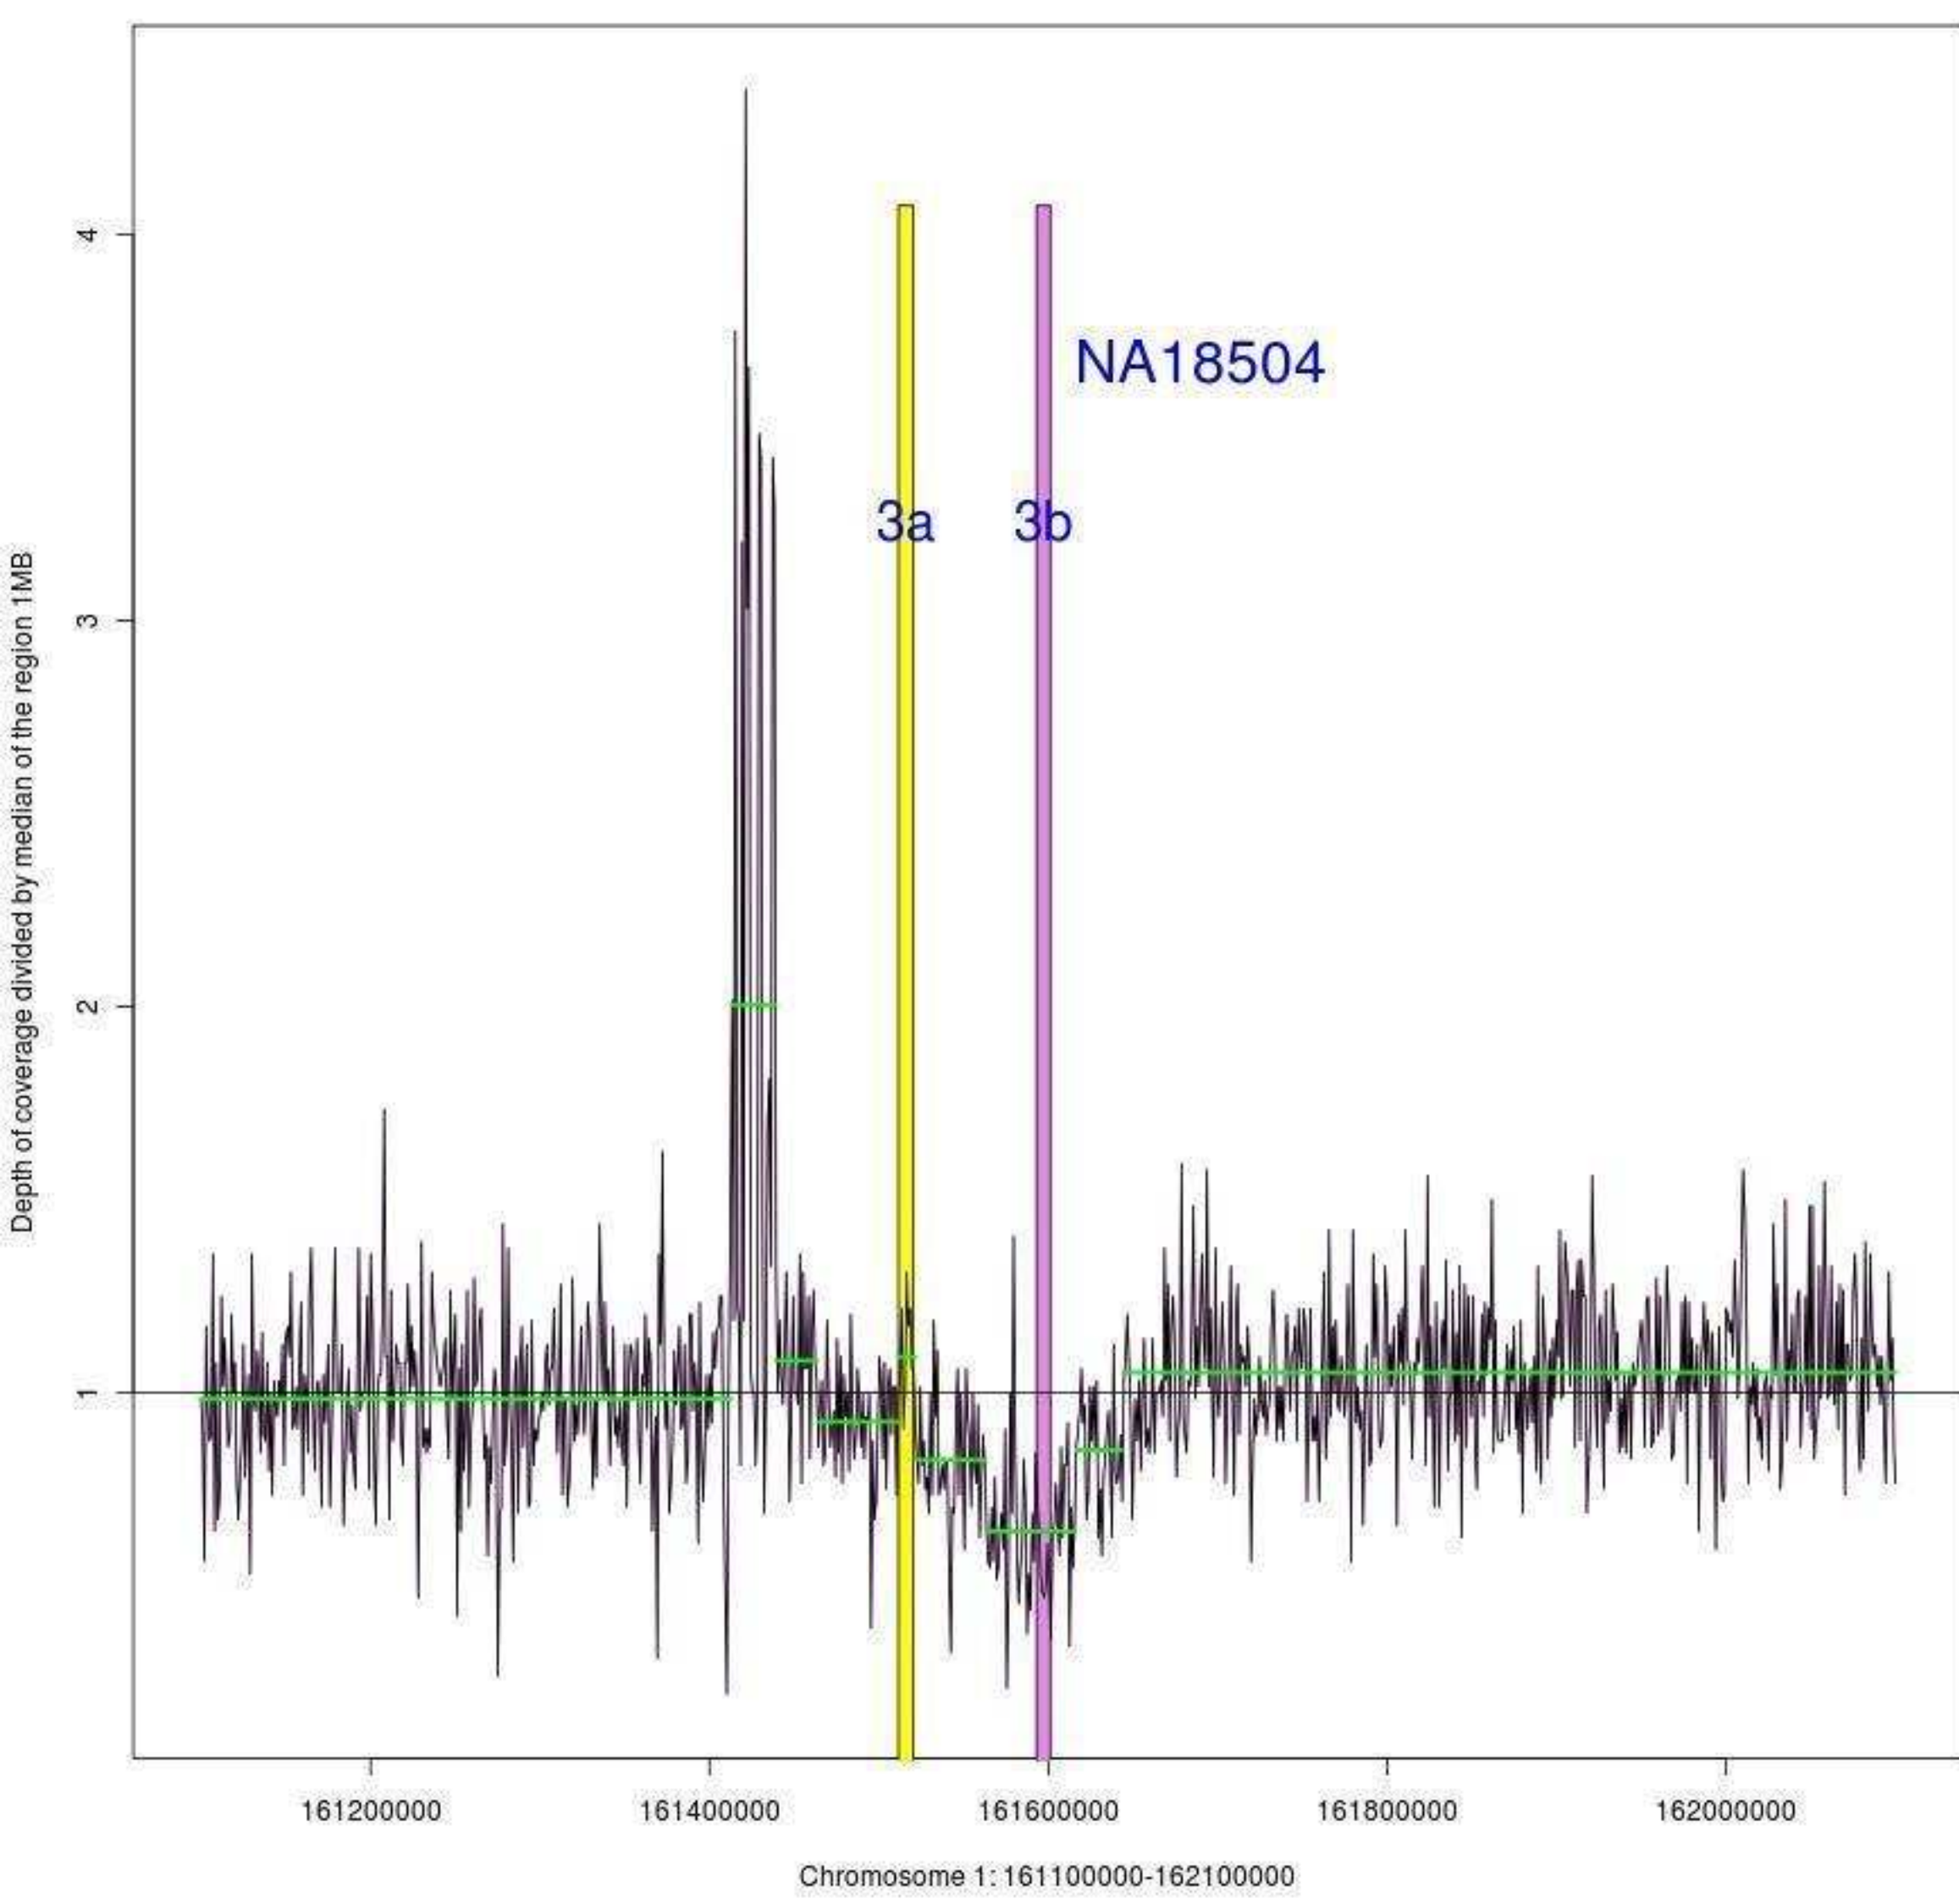

NA18504

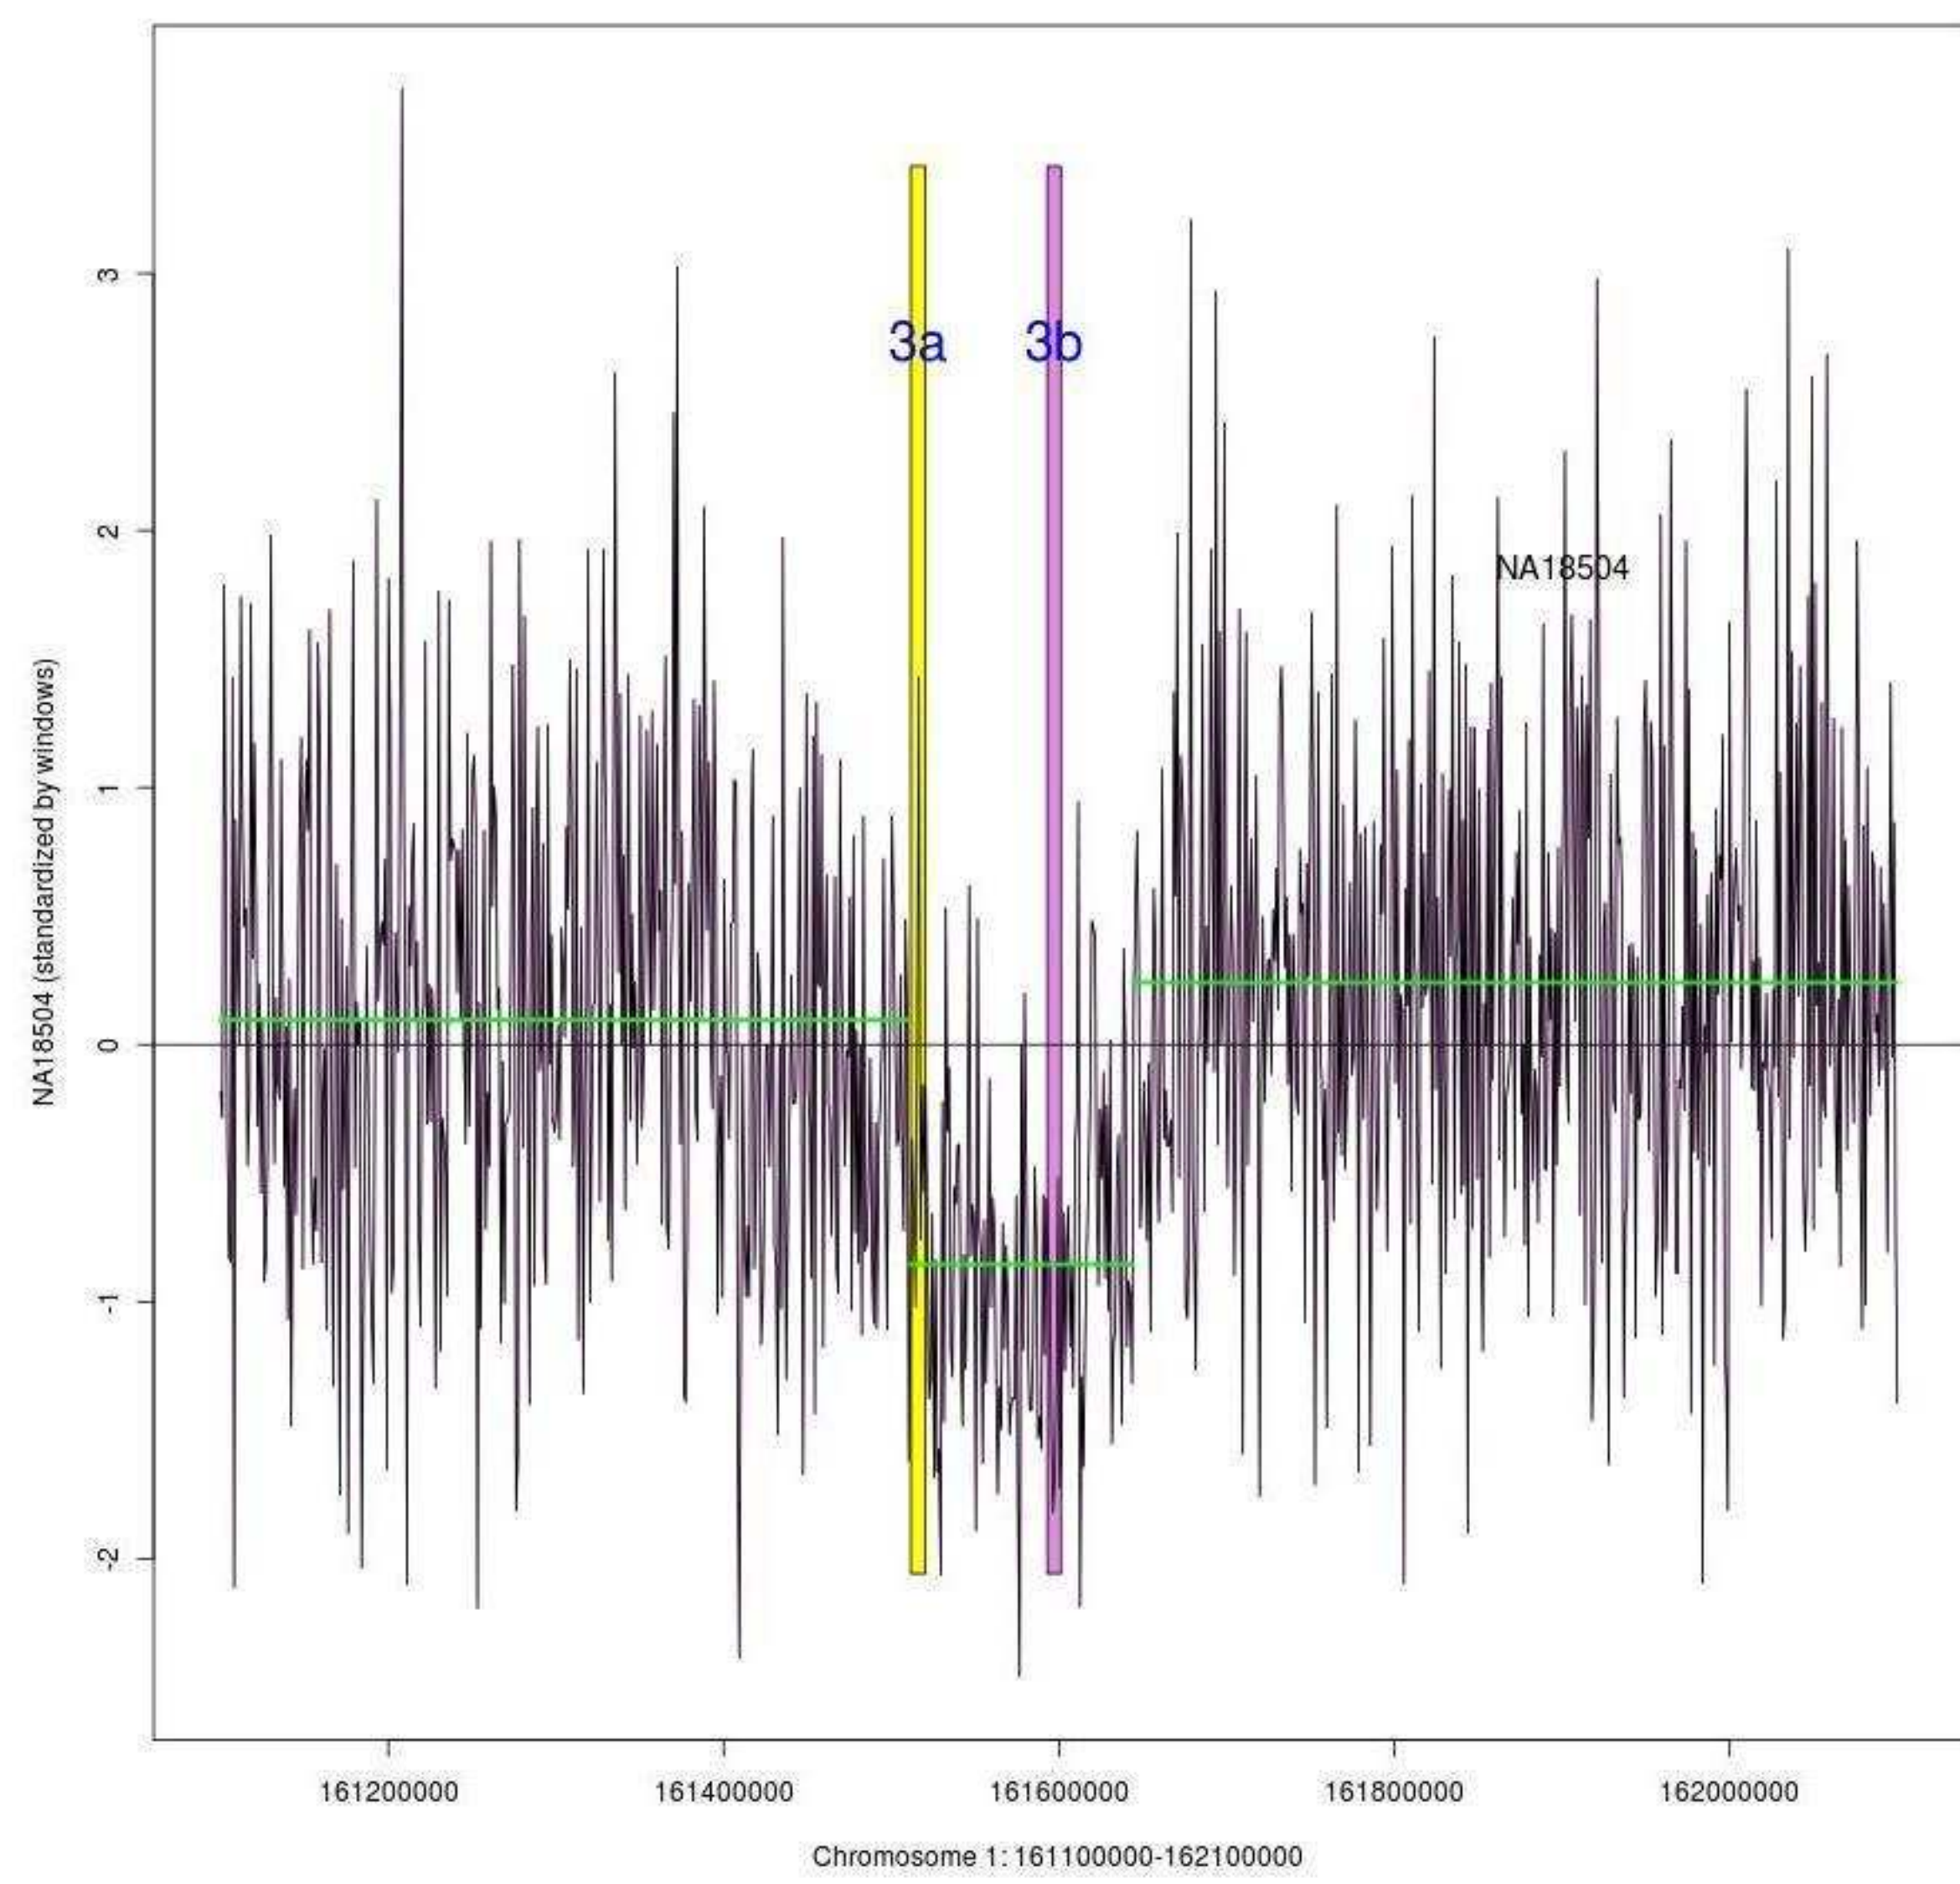

NA18537

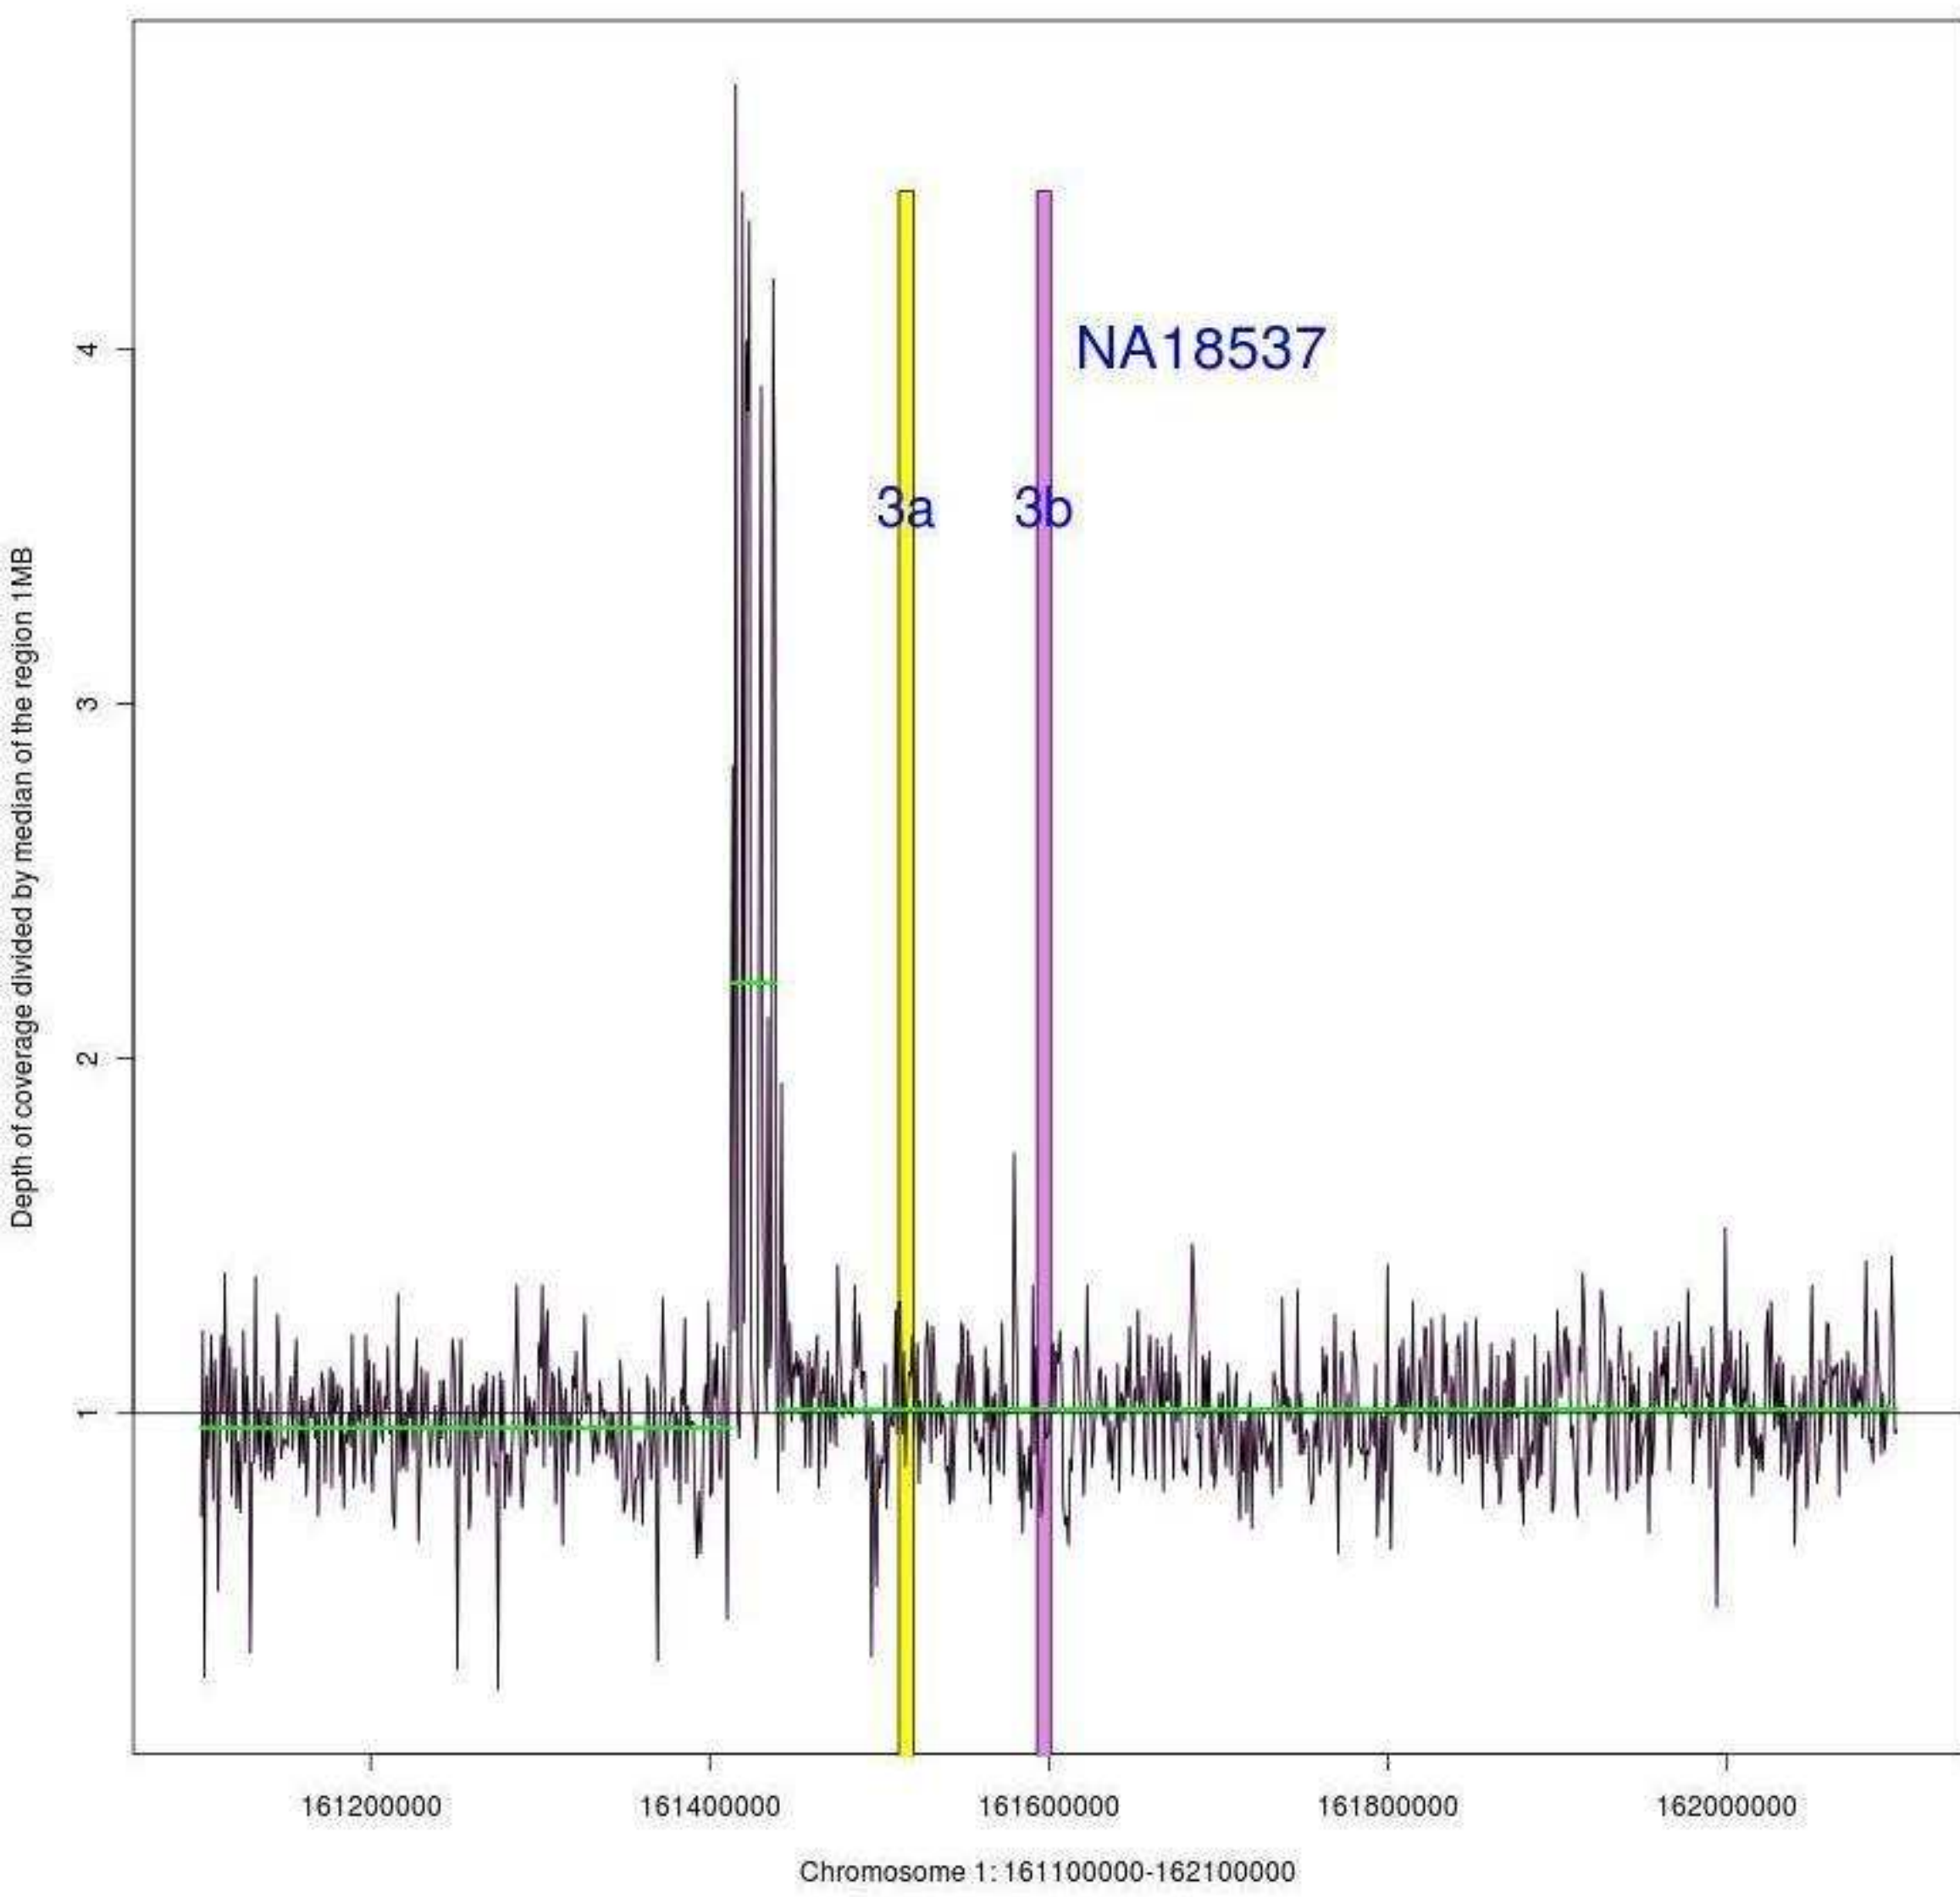

NA18537

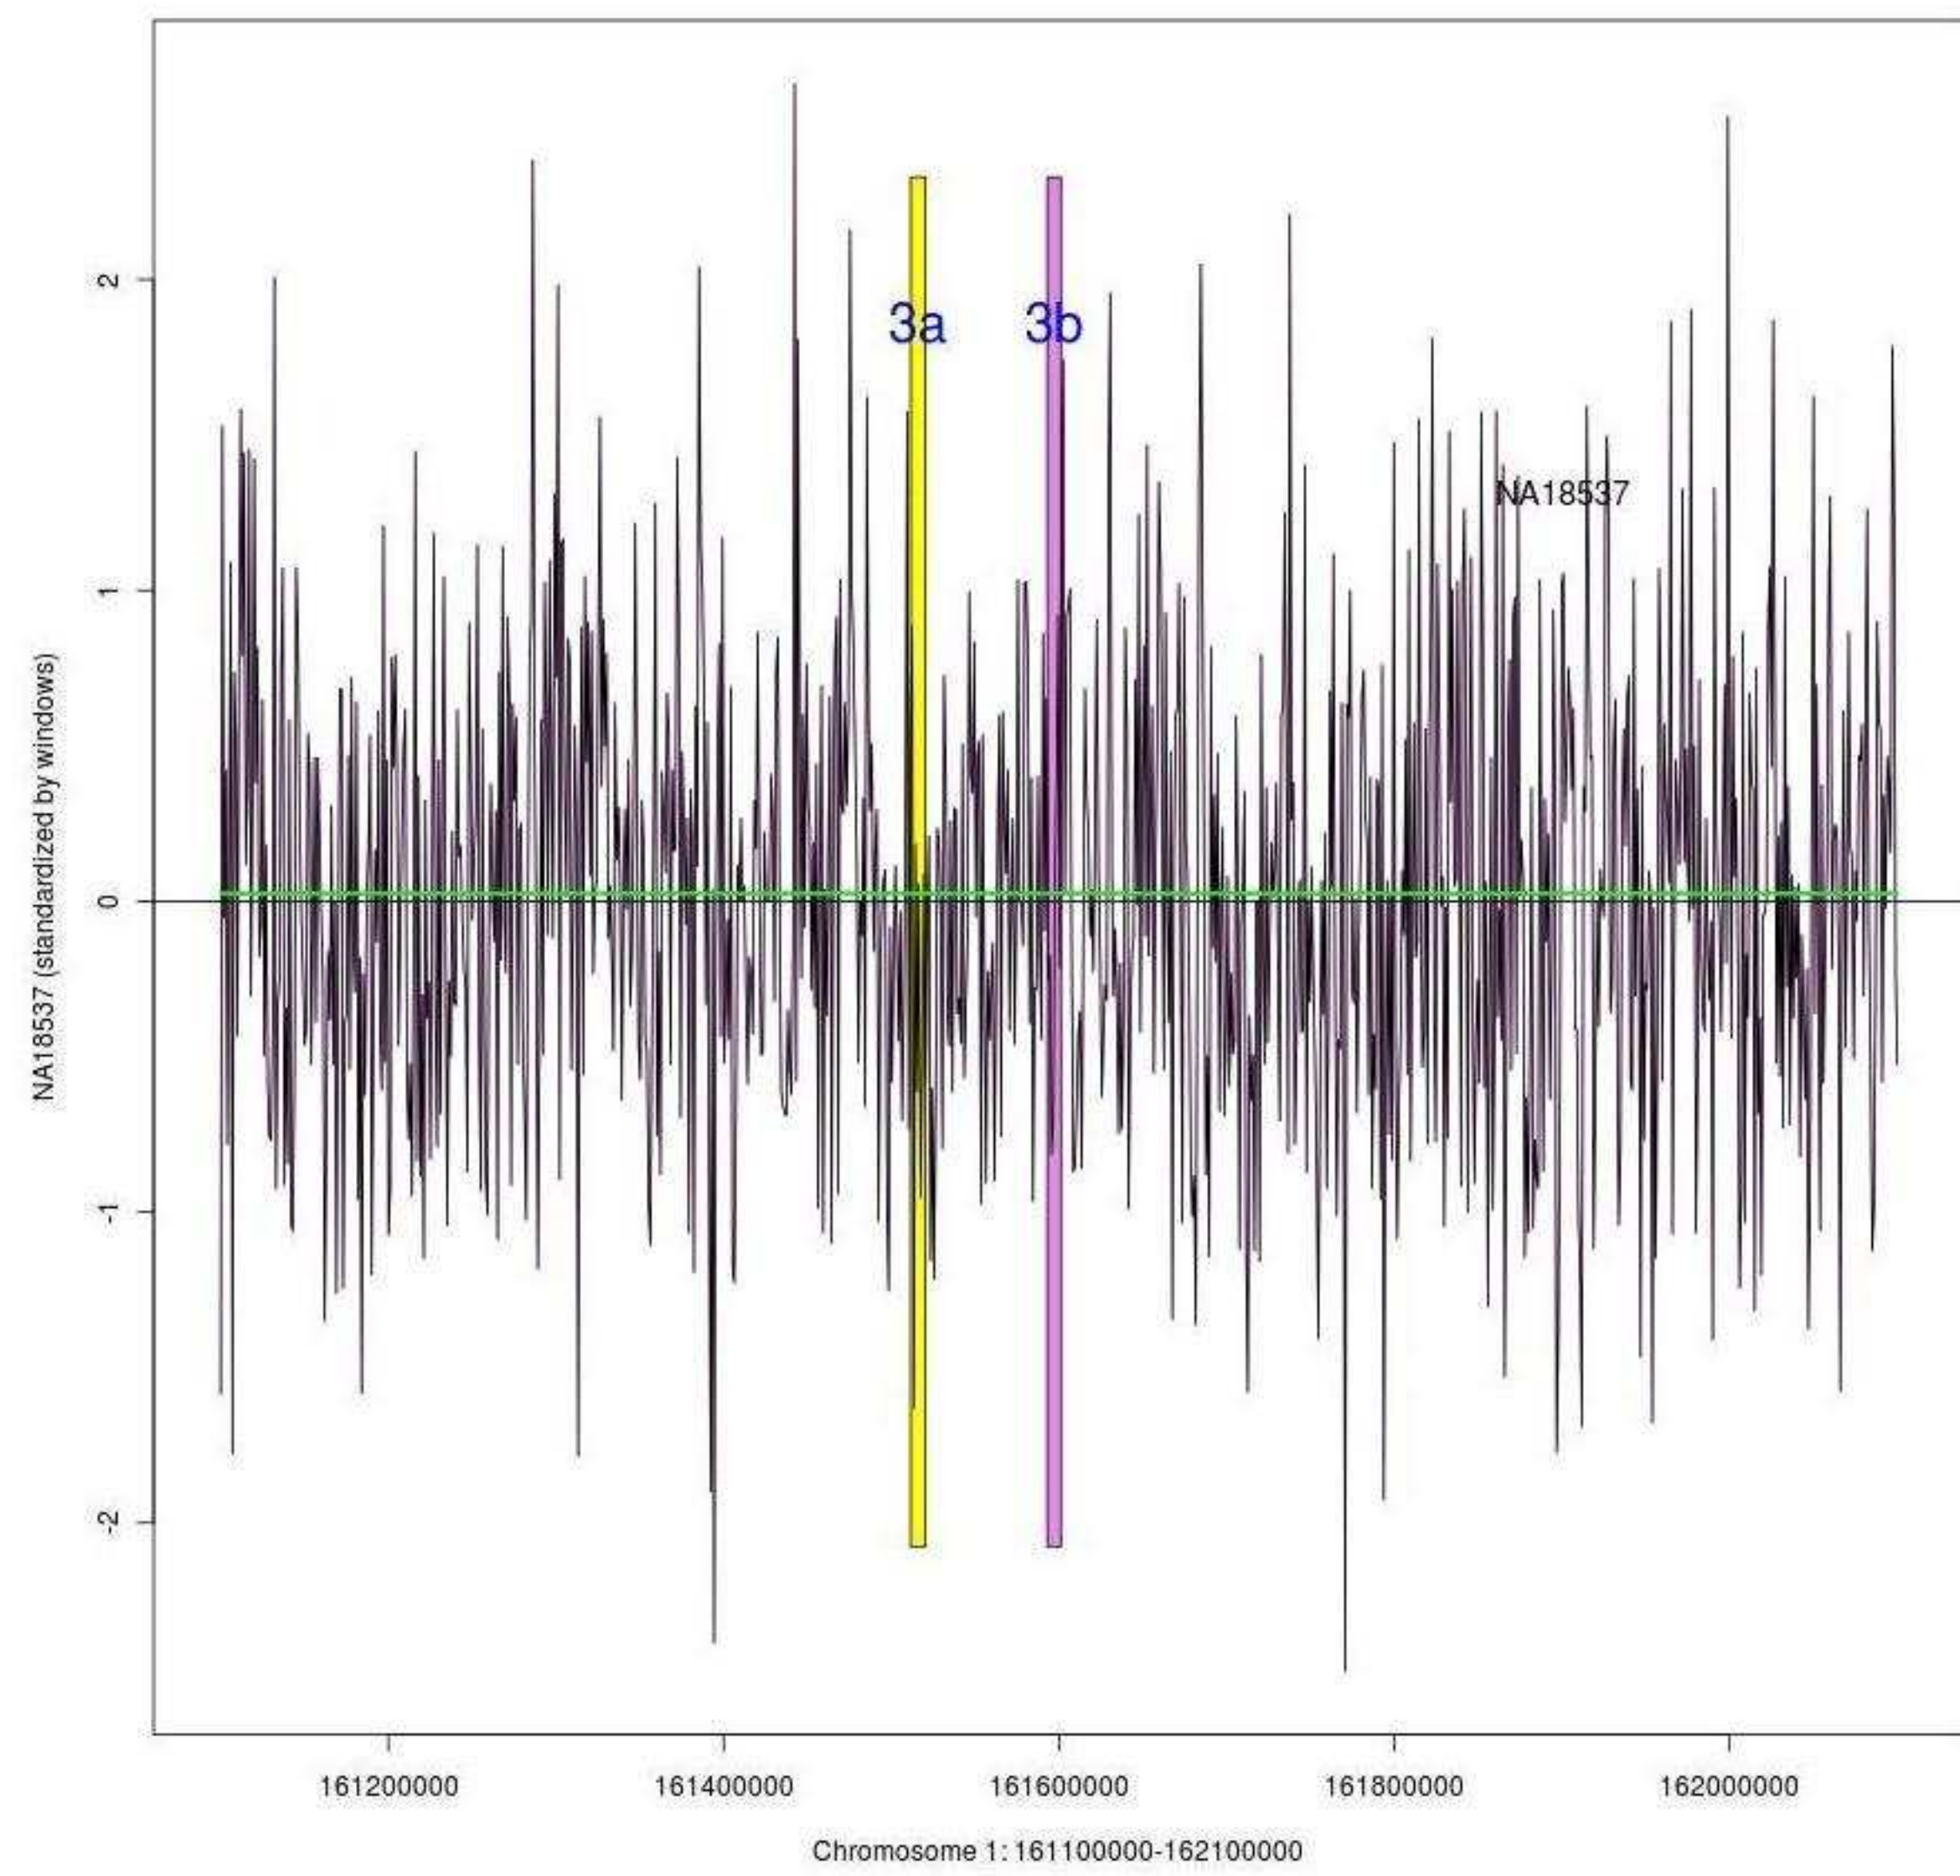

NA18545

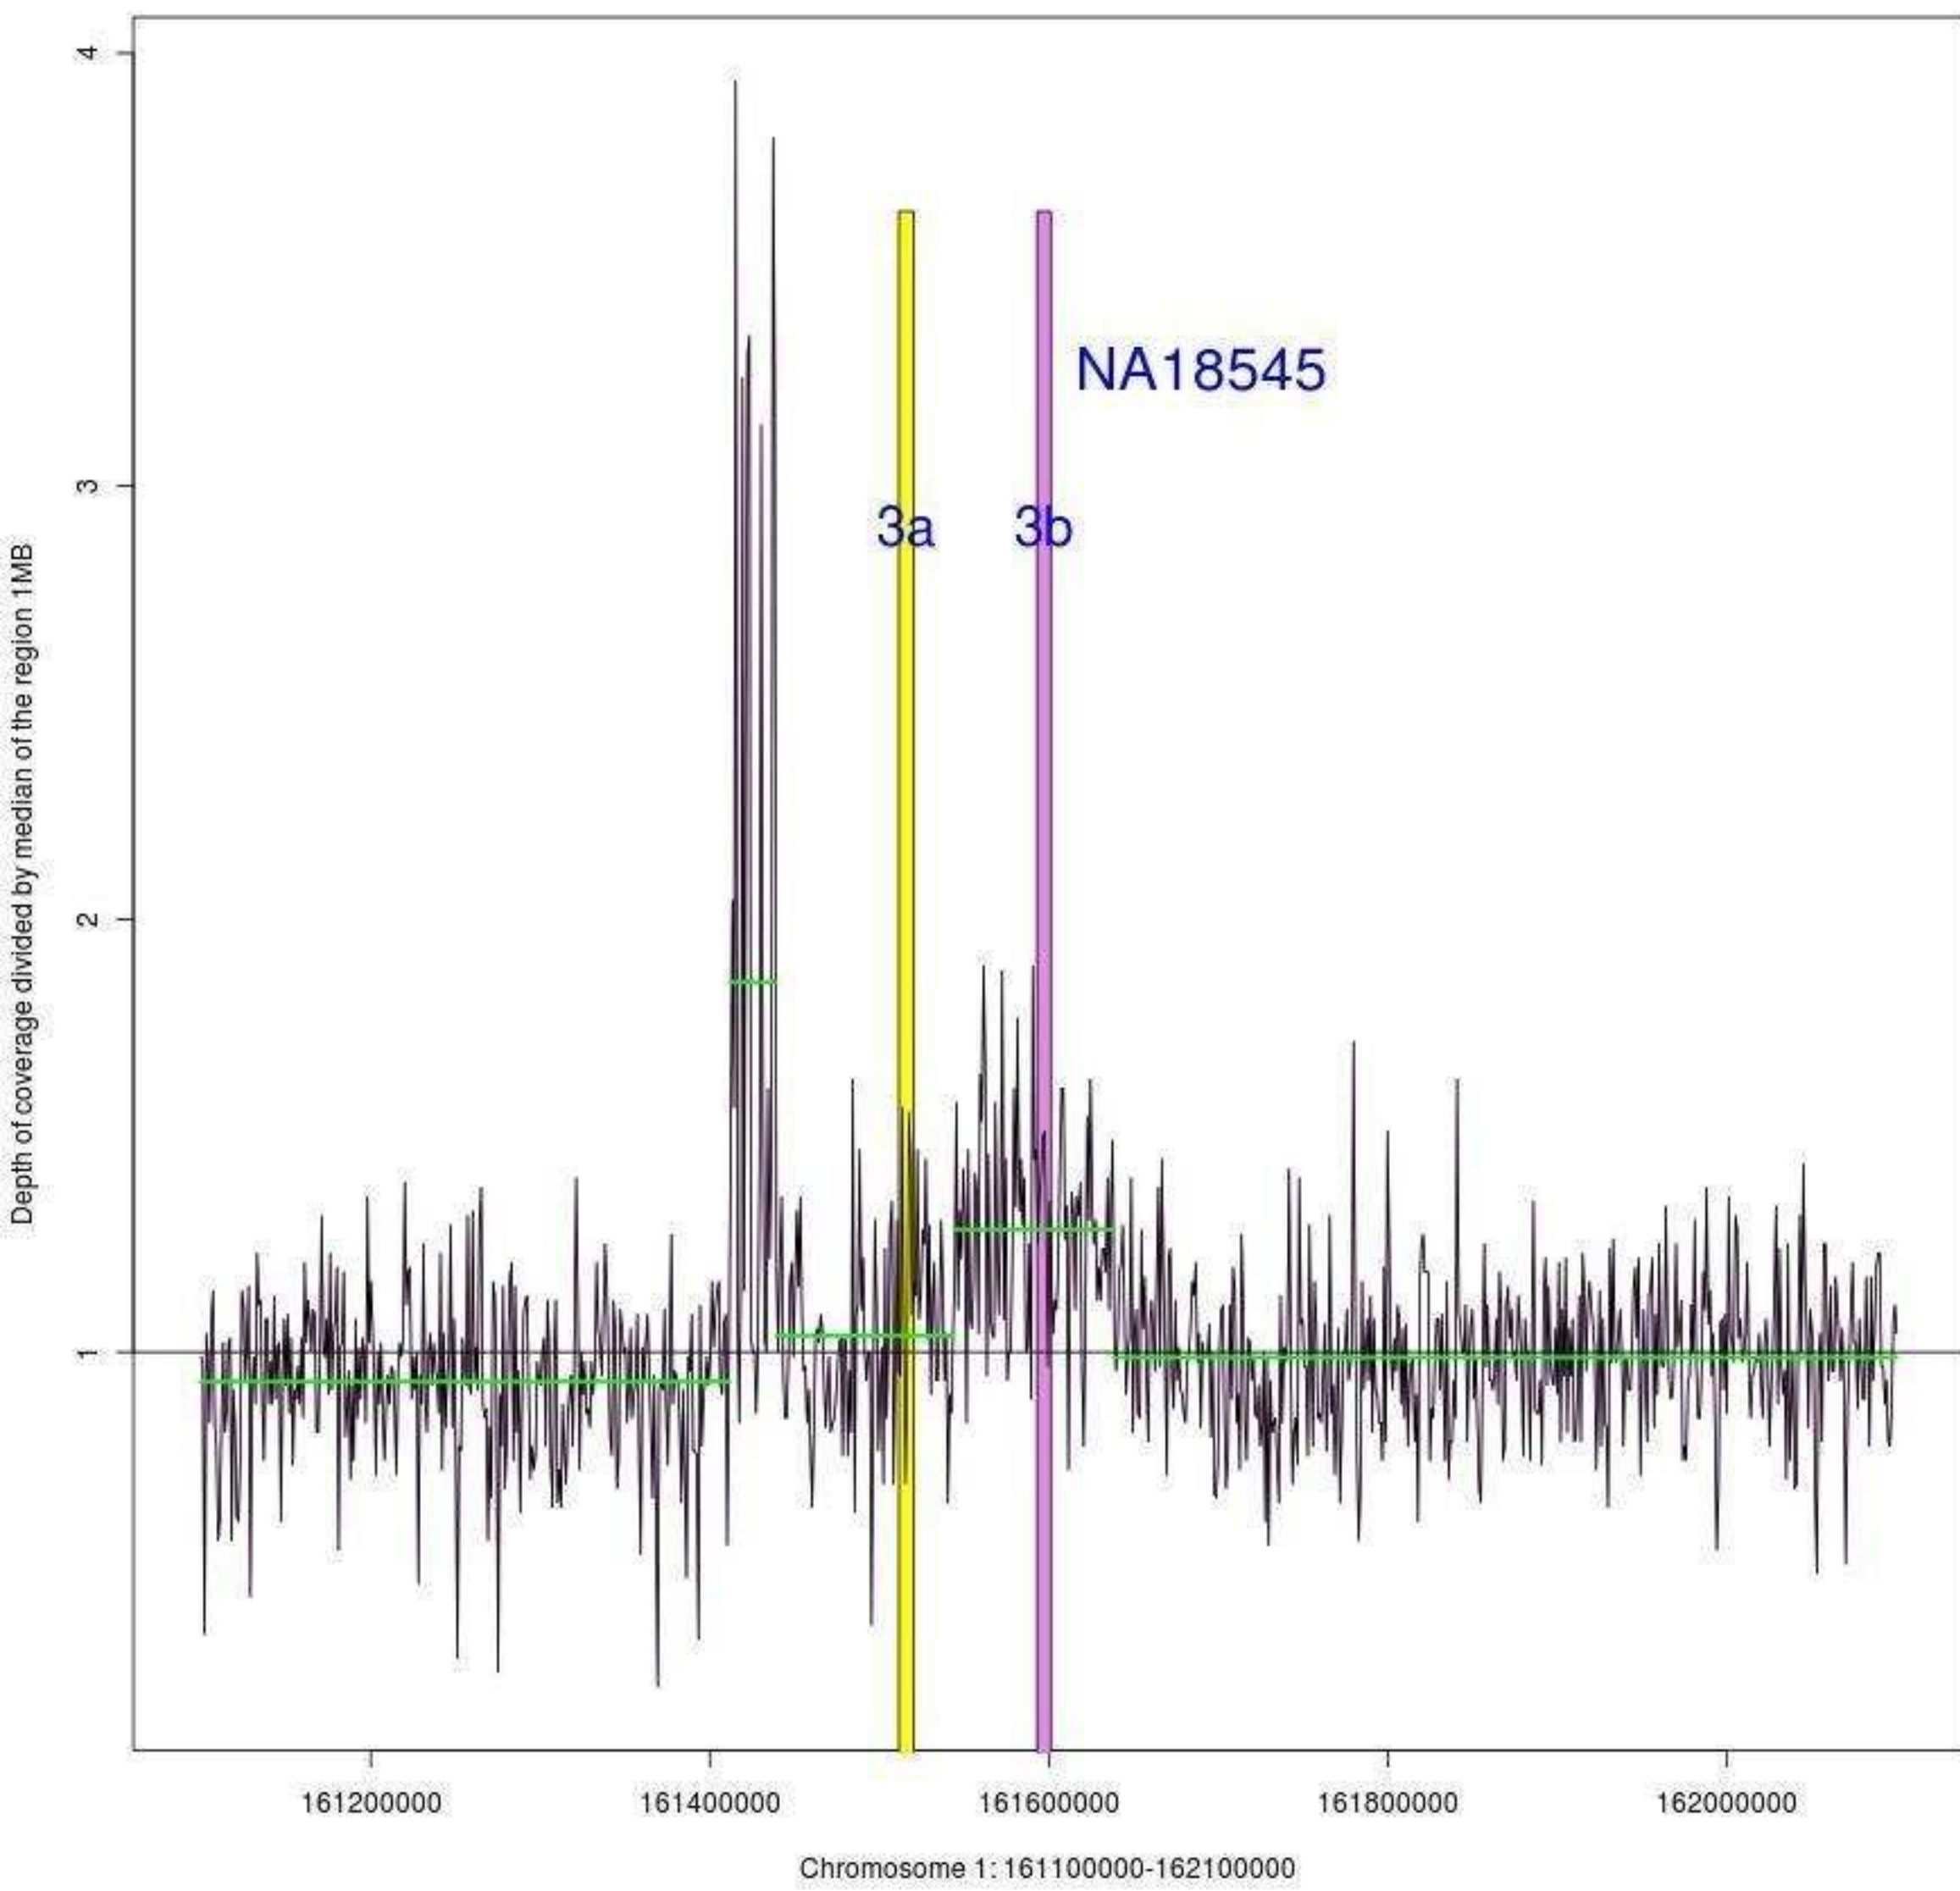

NA18545

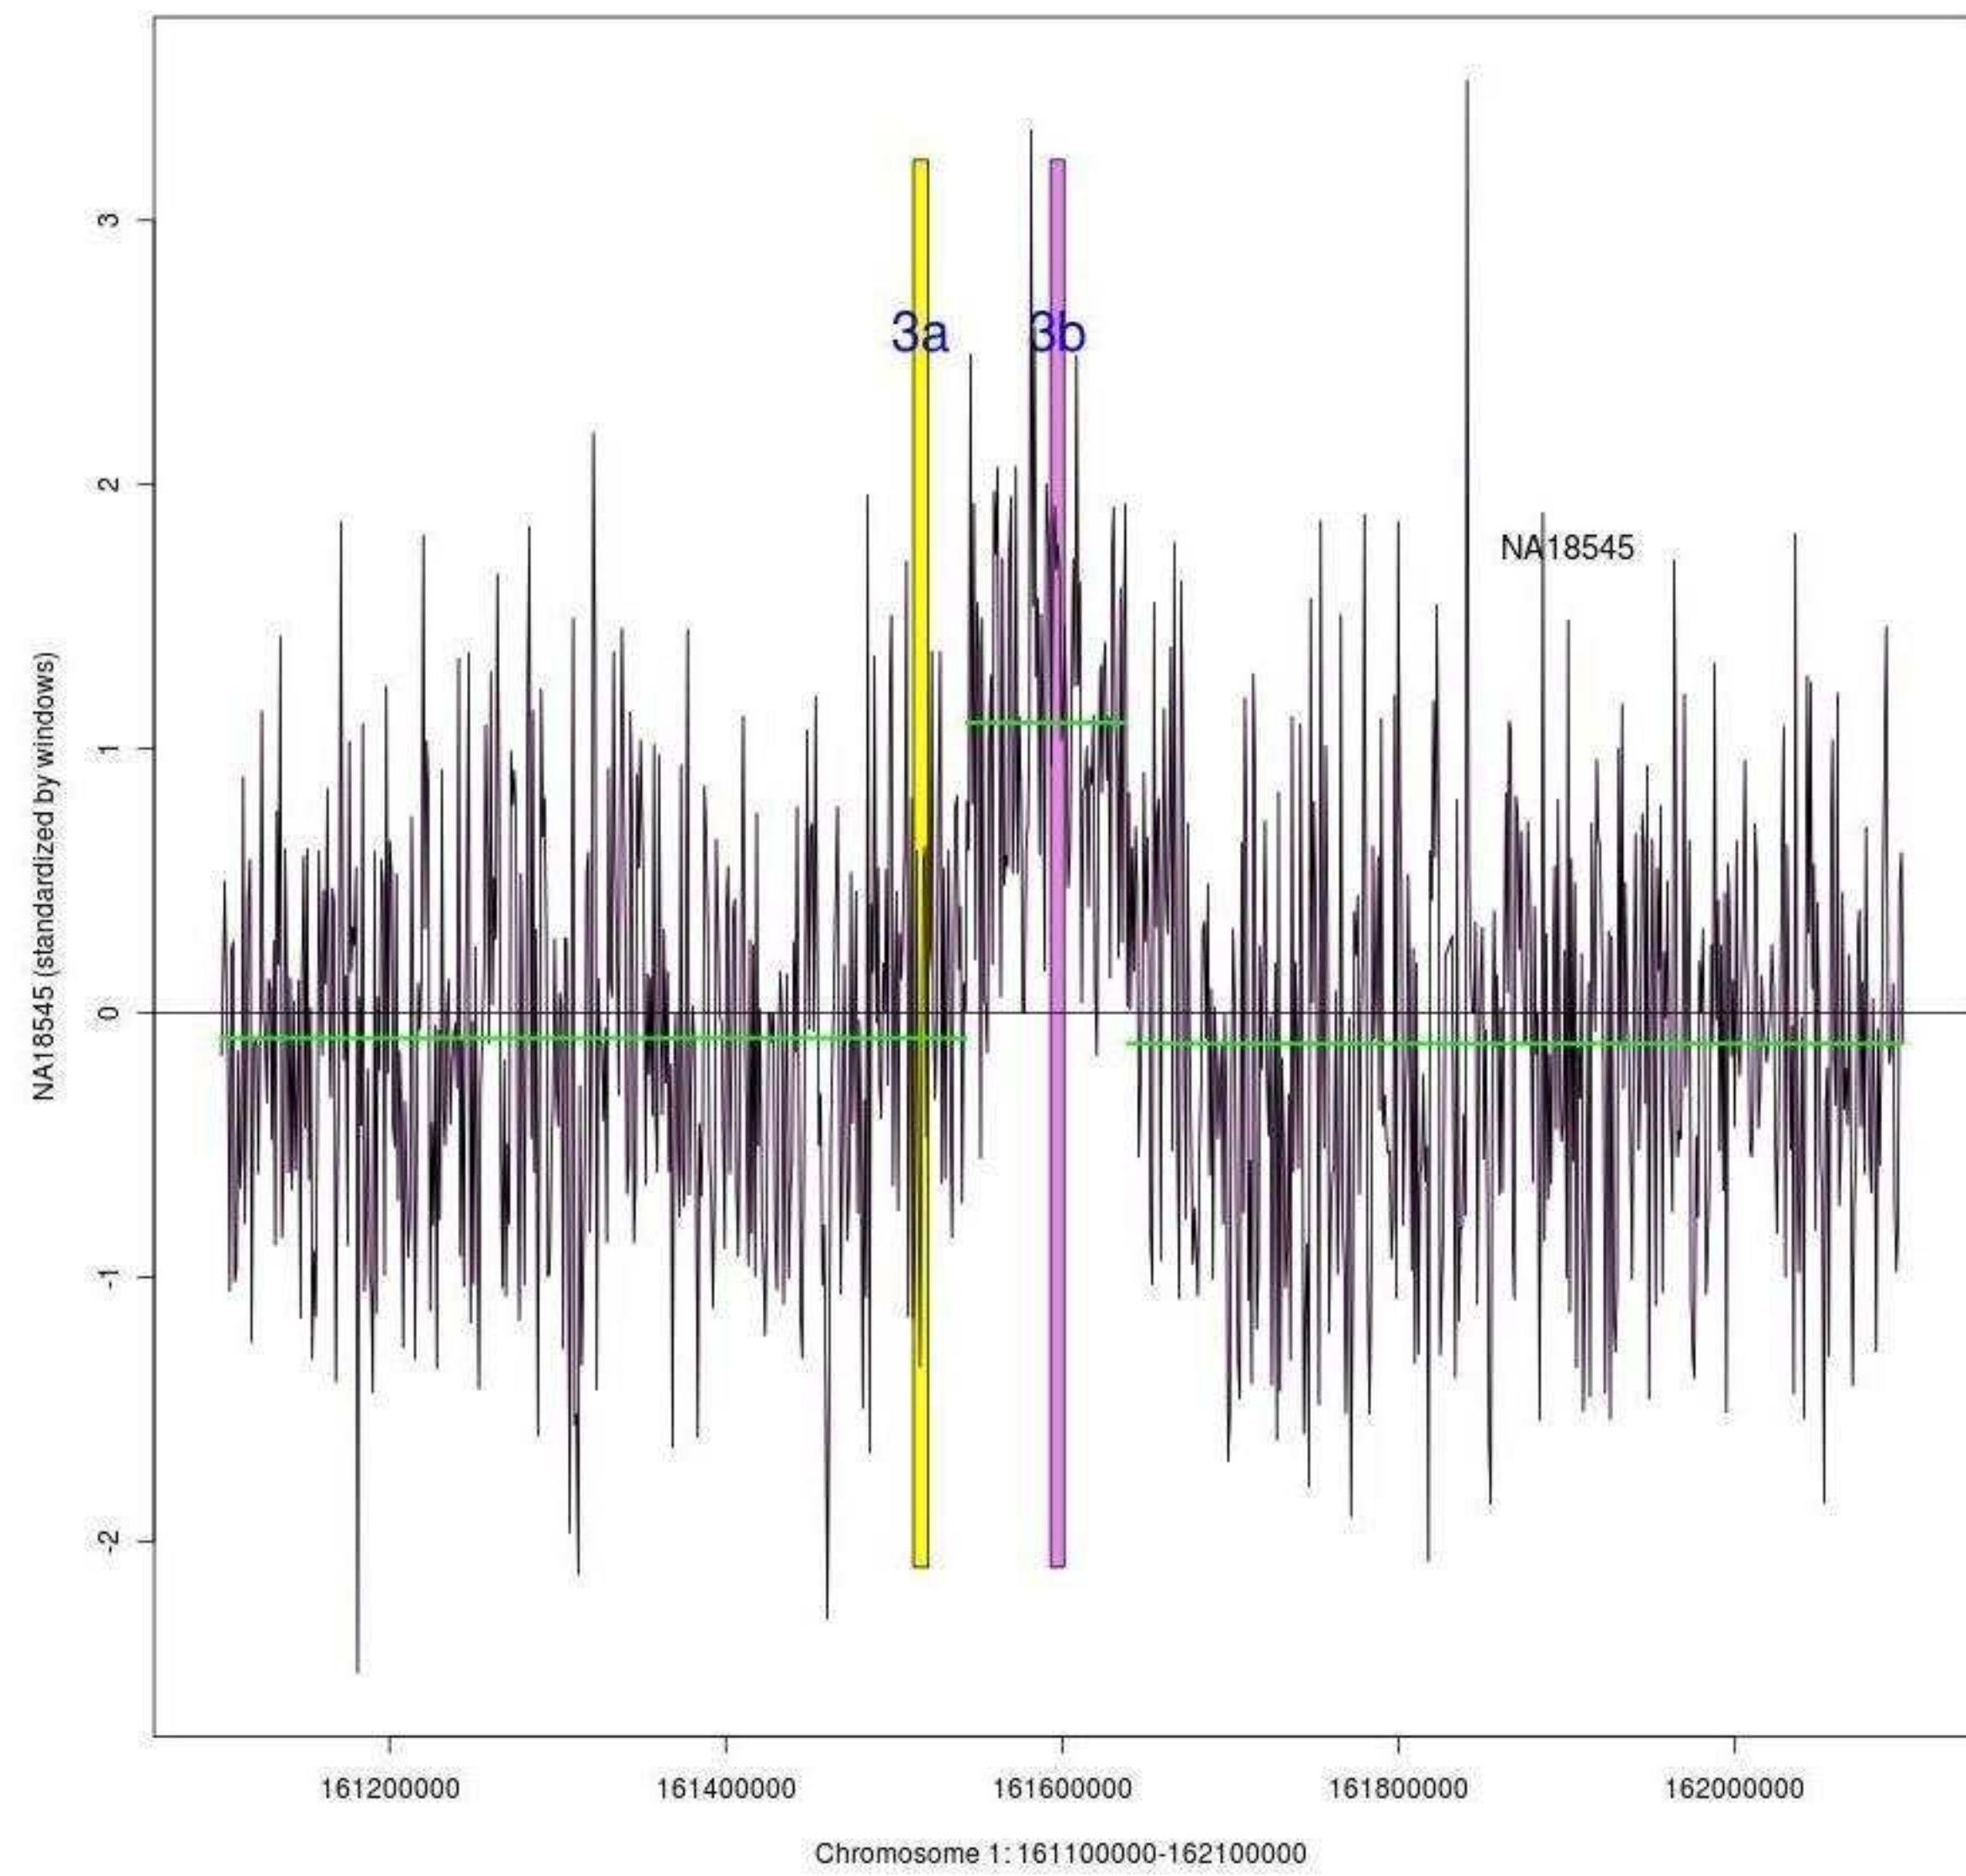



NA18547

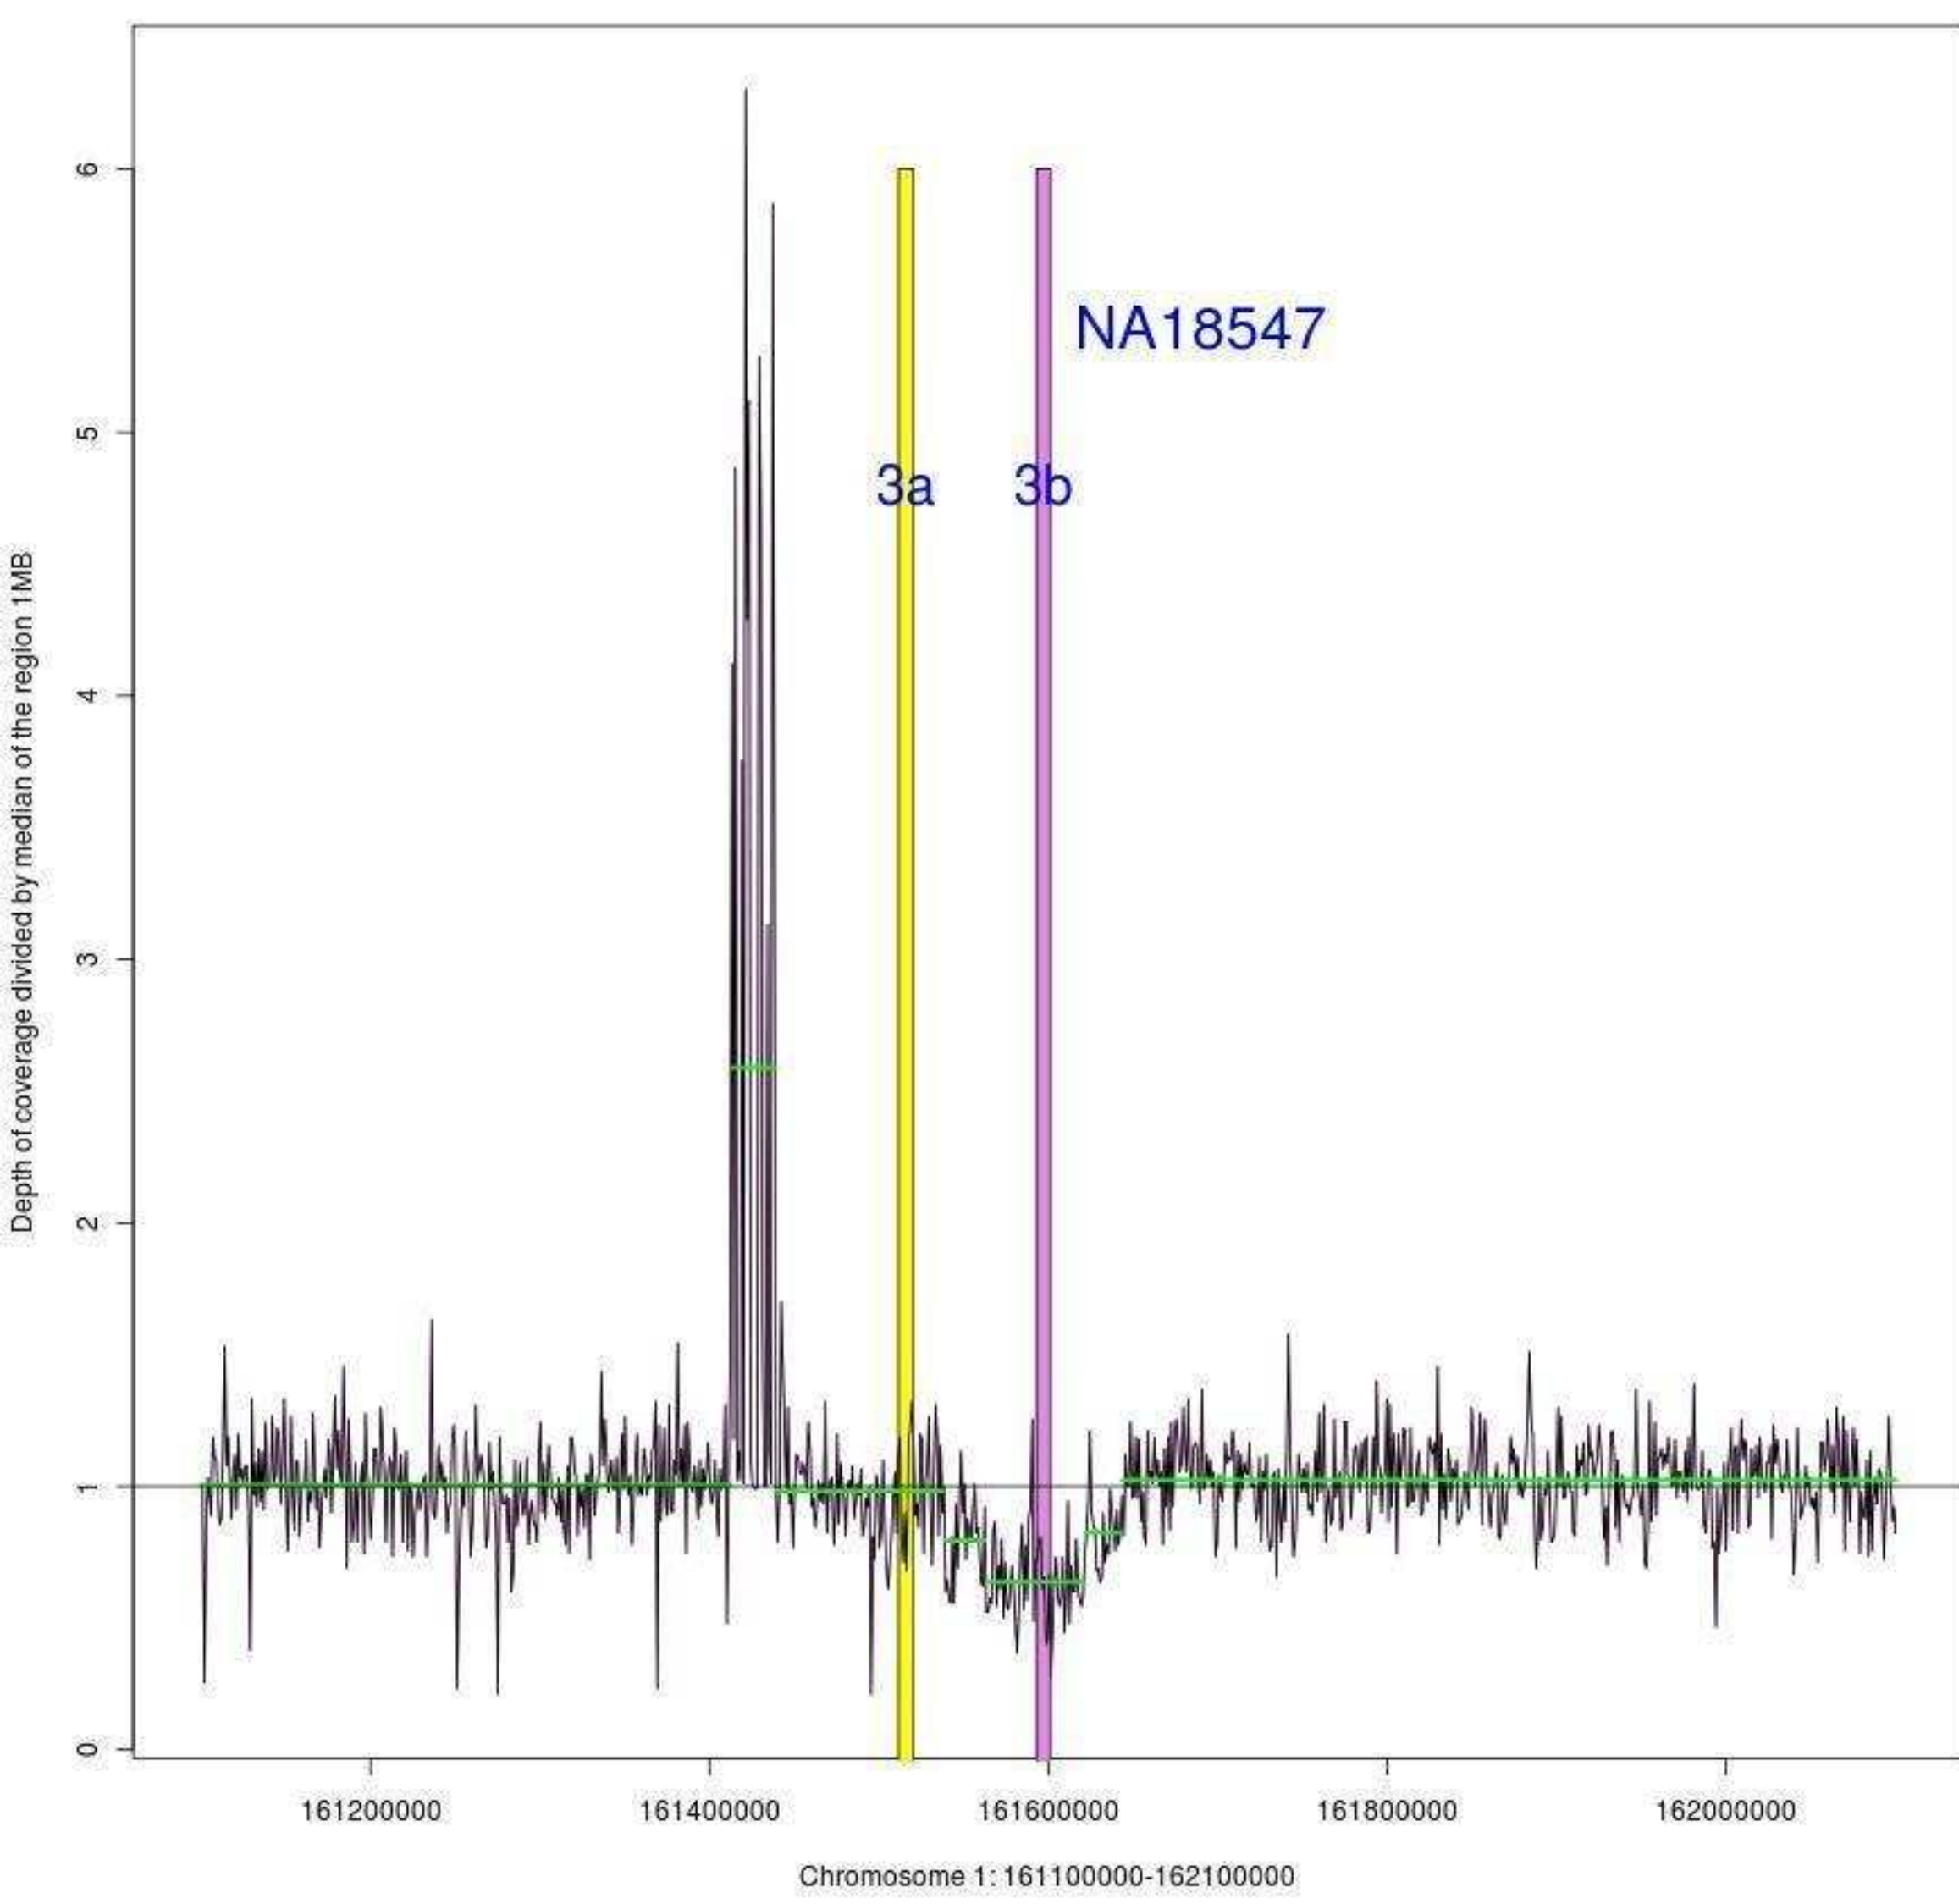

NA18547

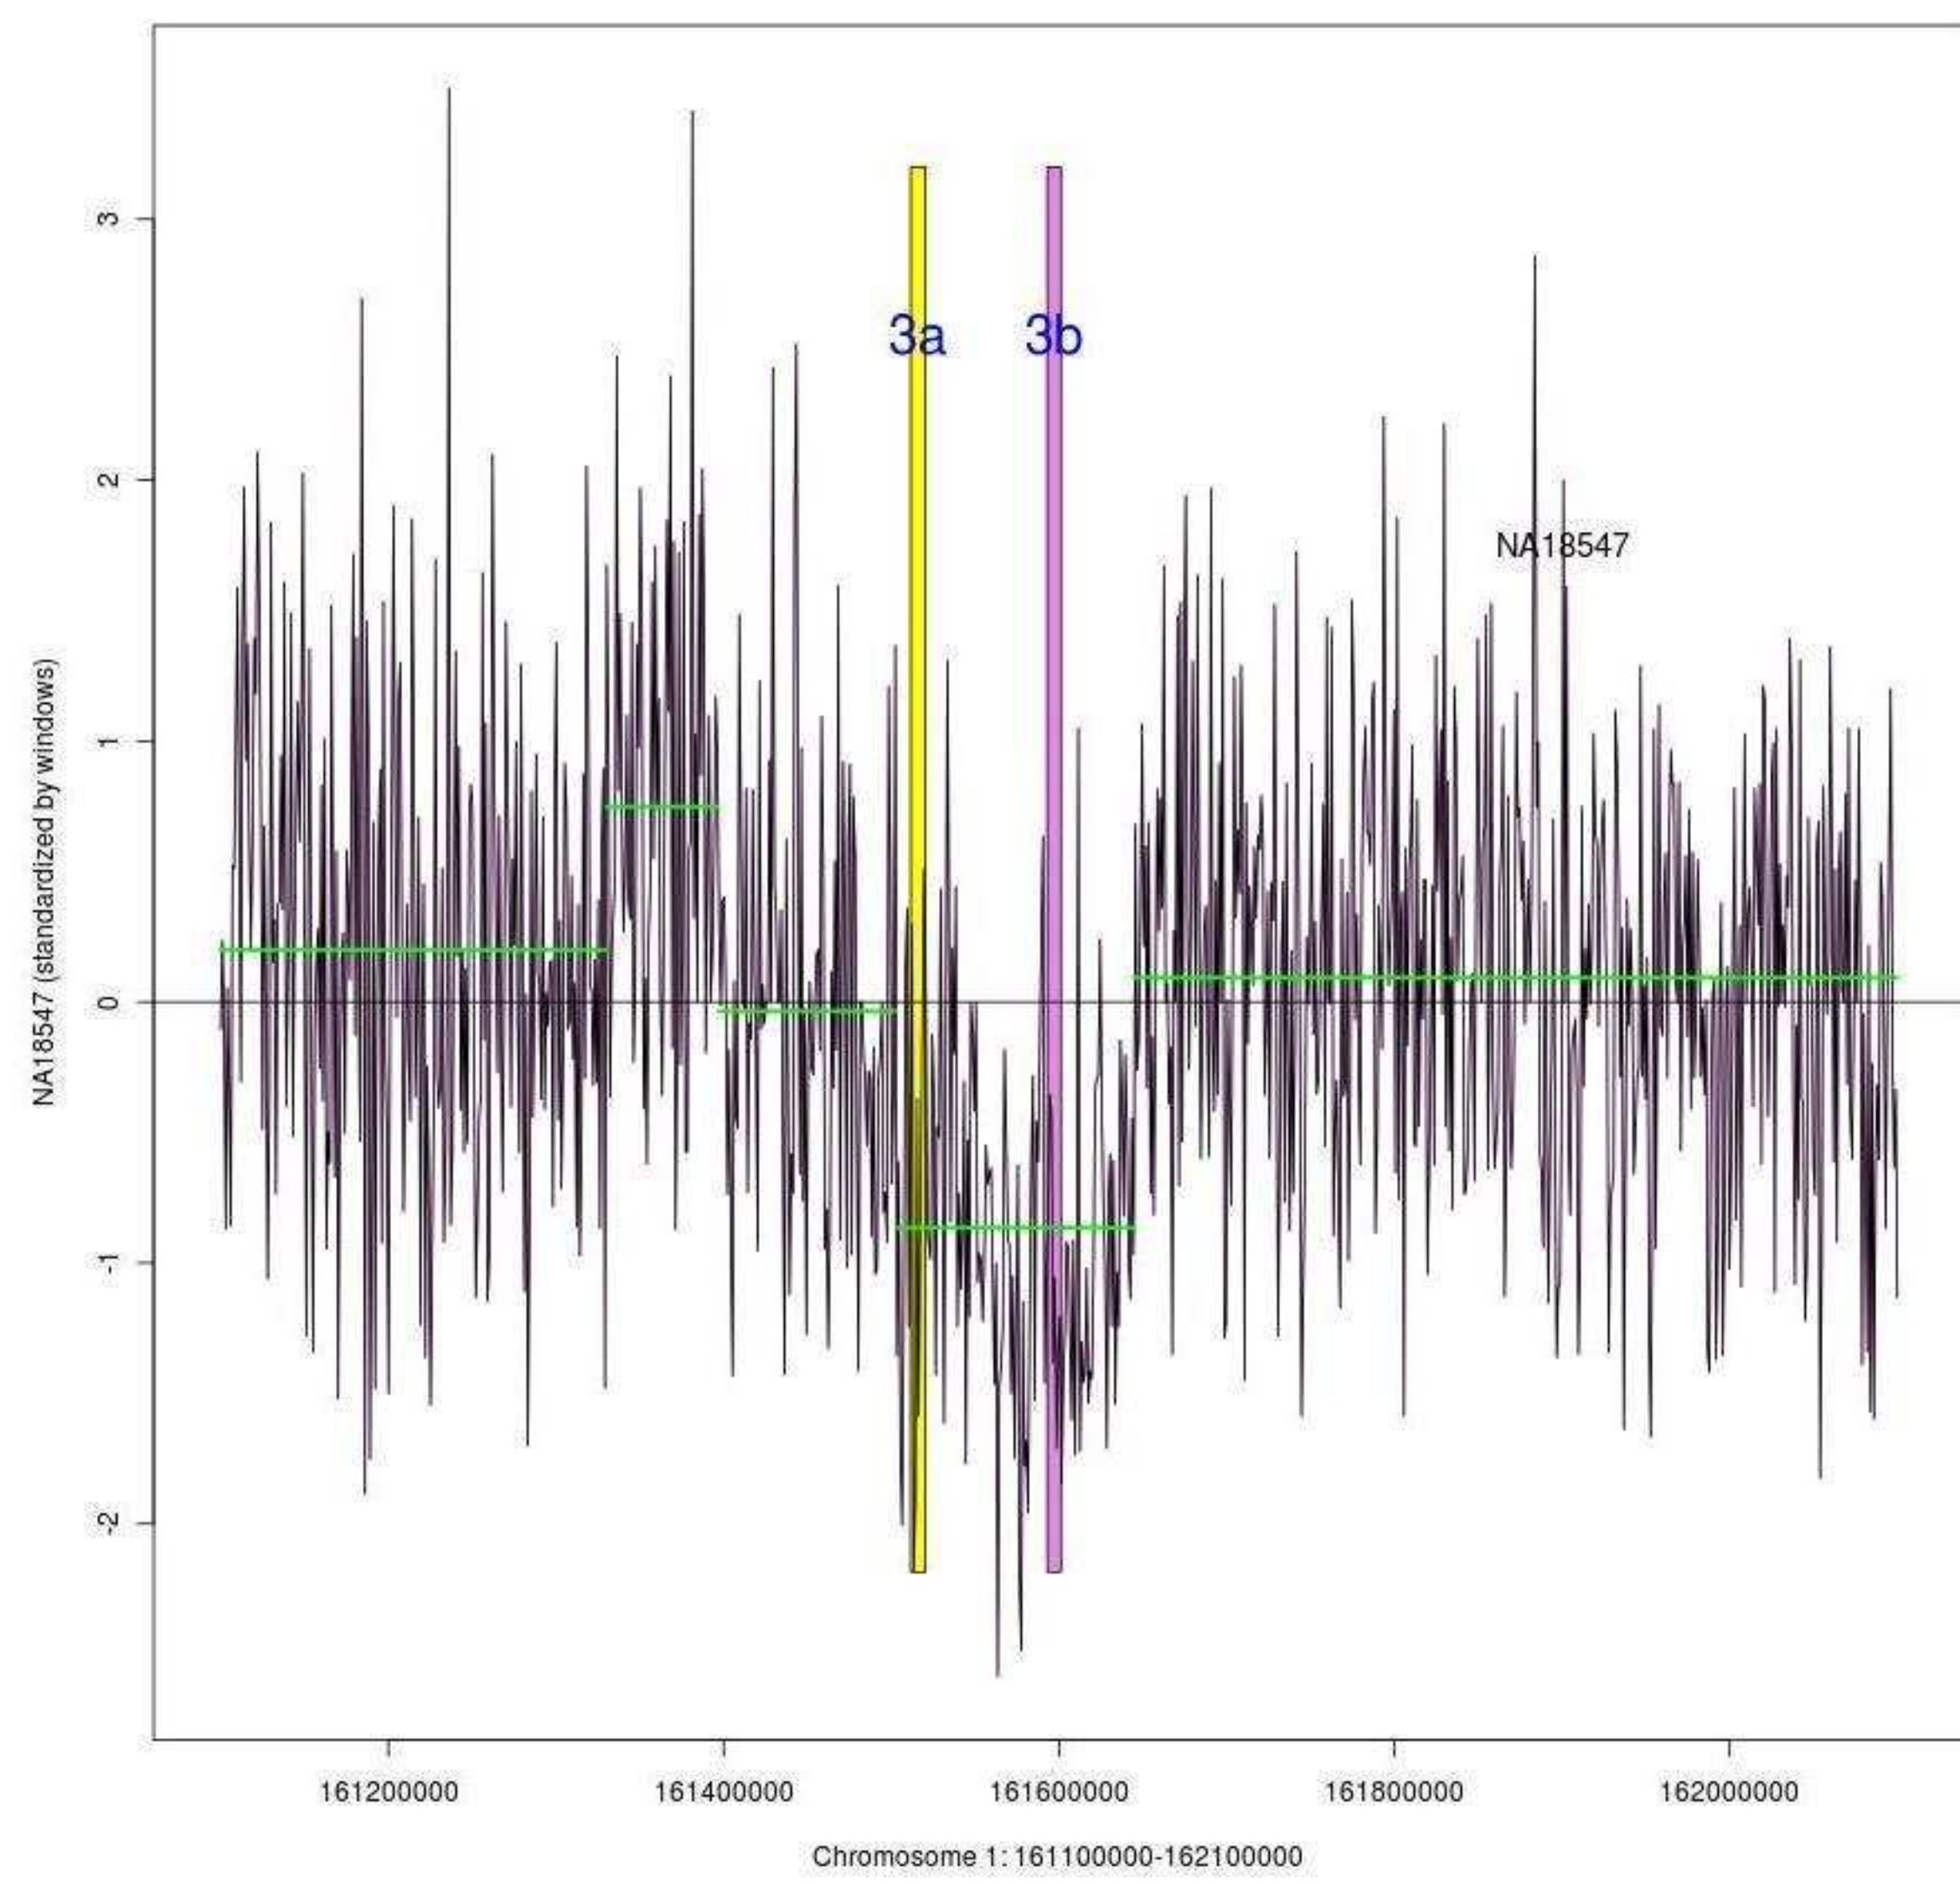

NA18552

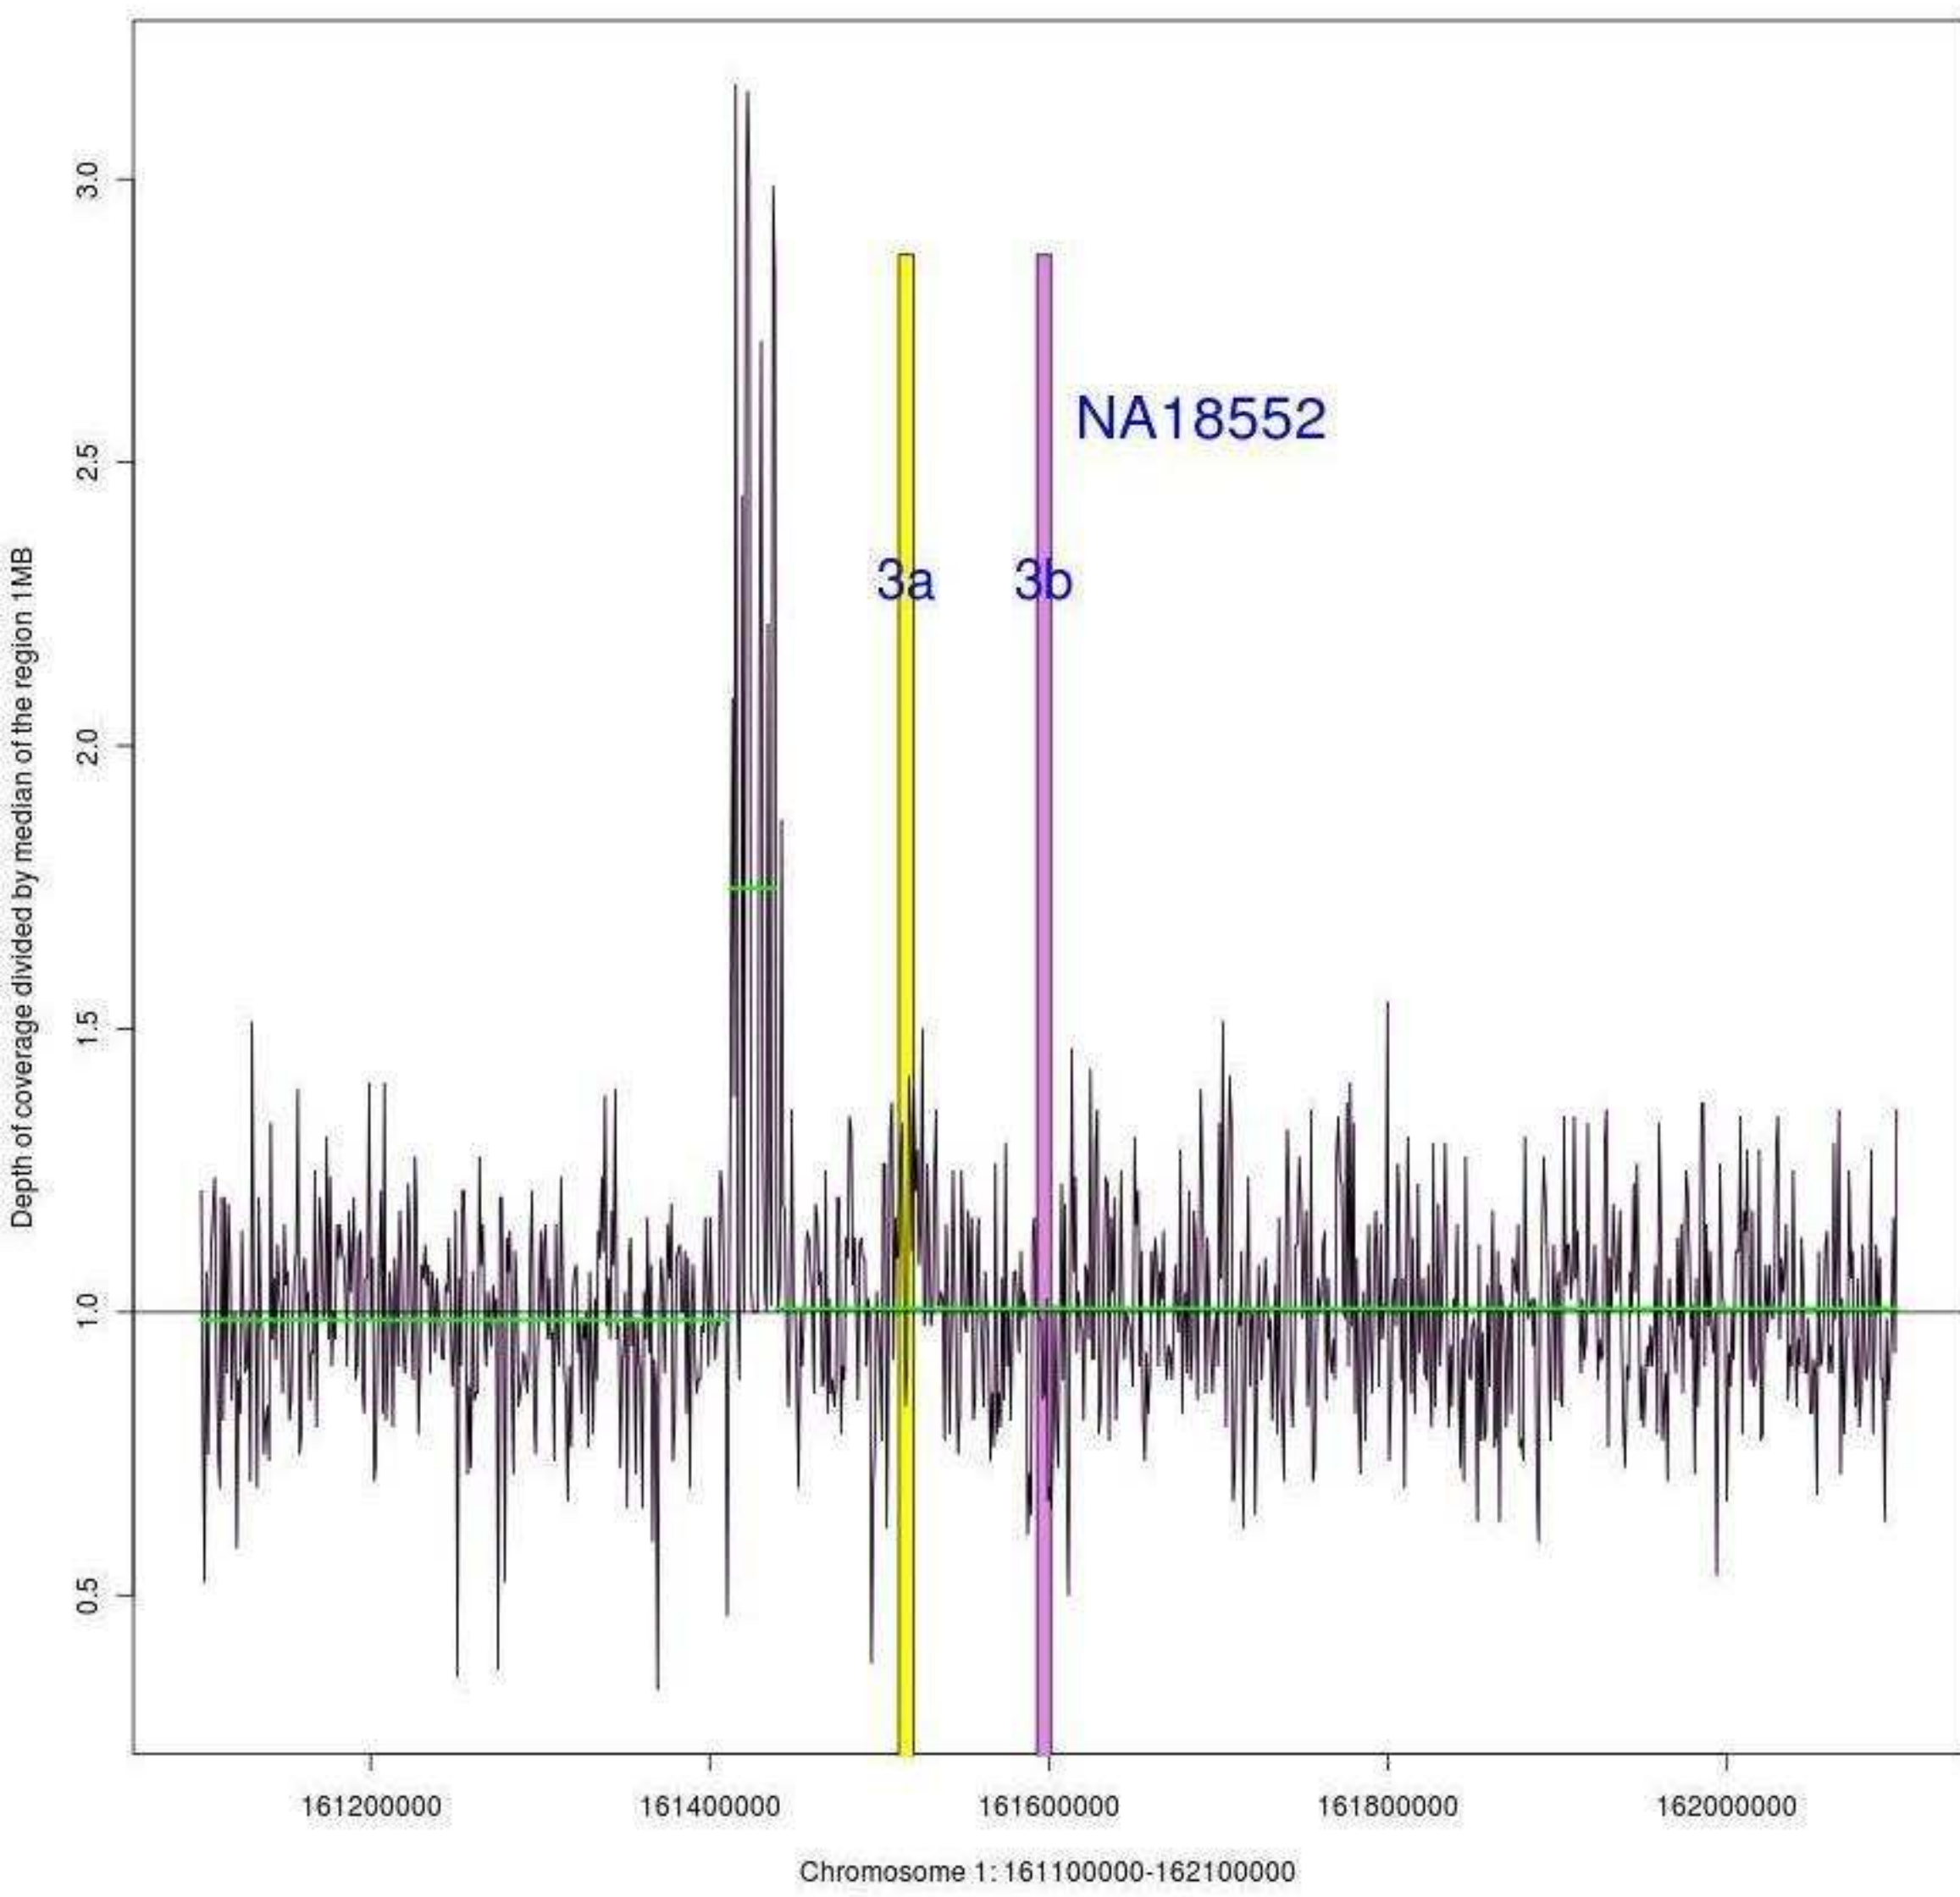

NA18552

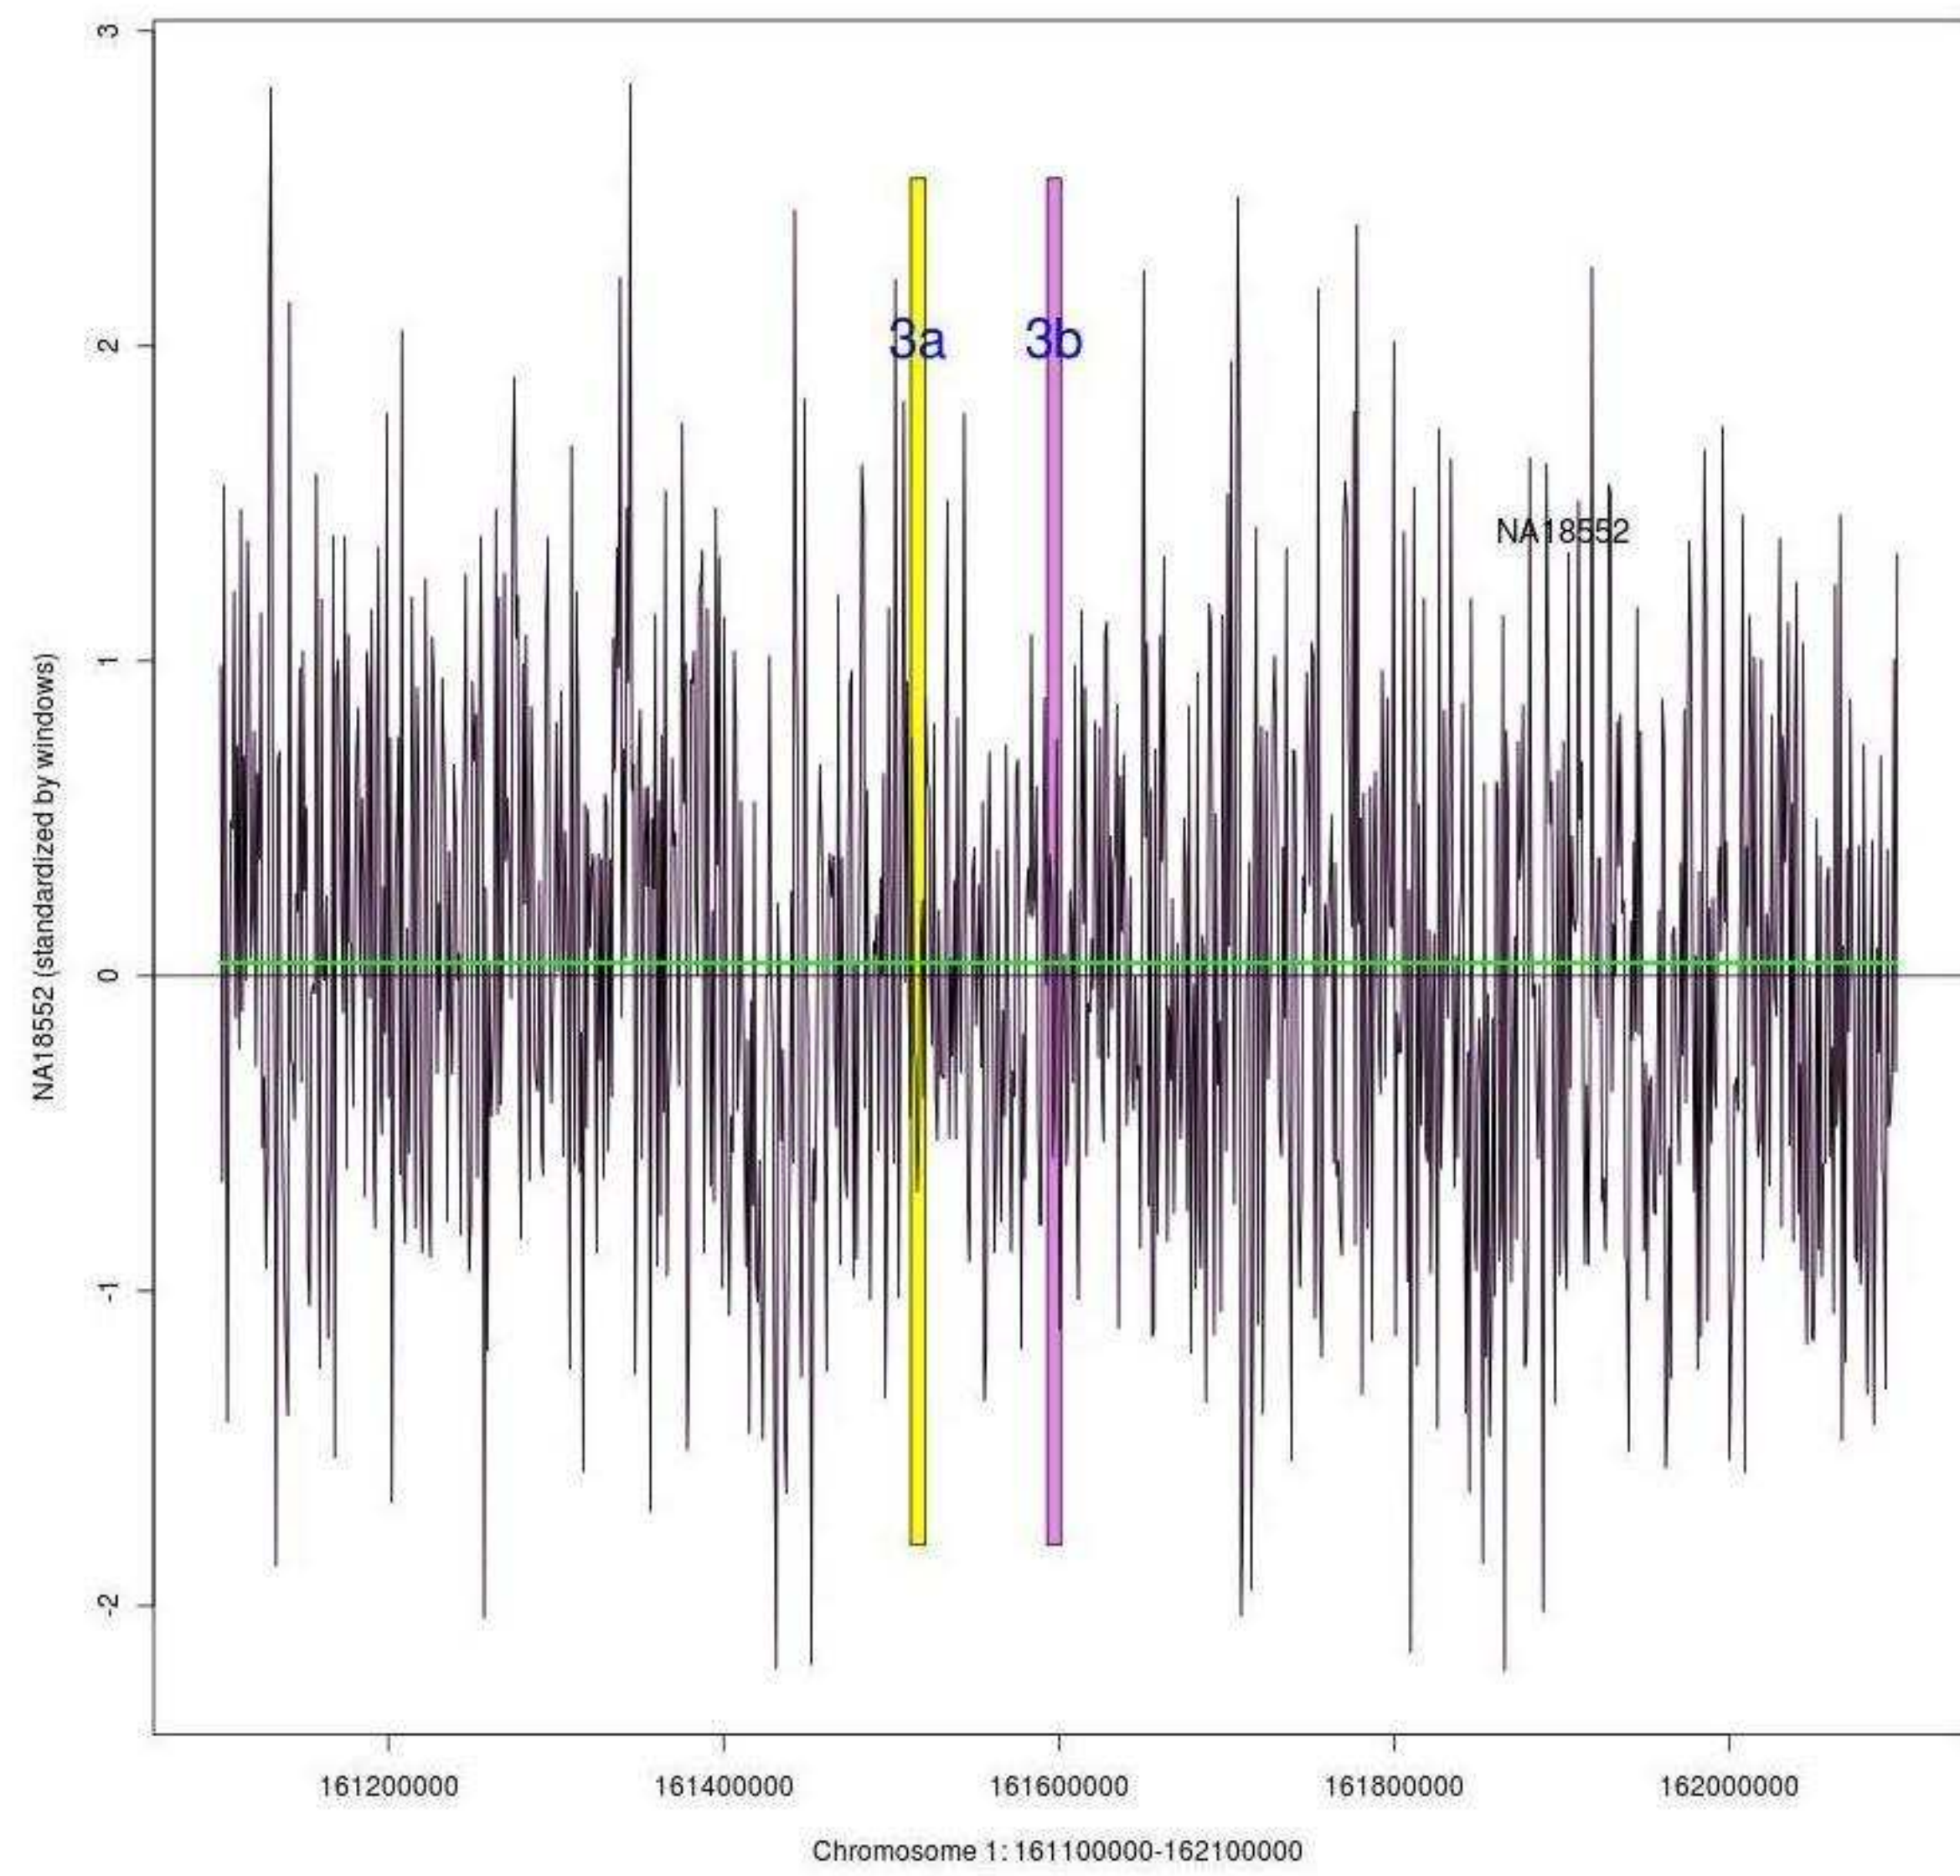

NA18555

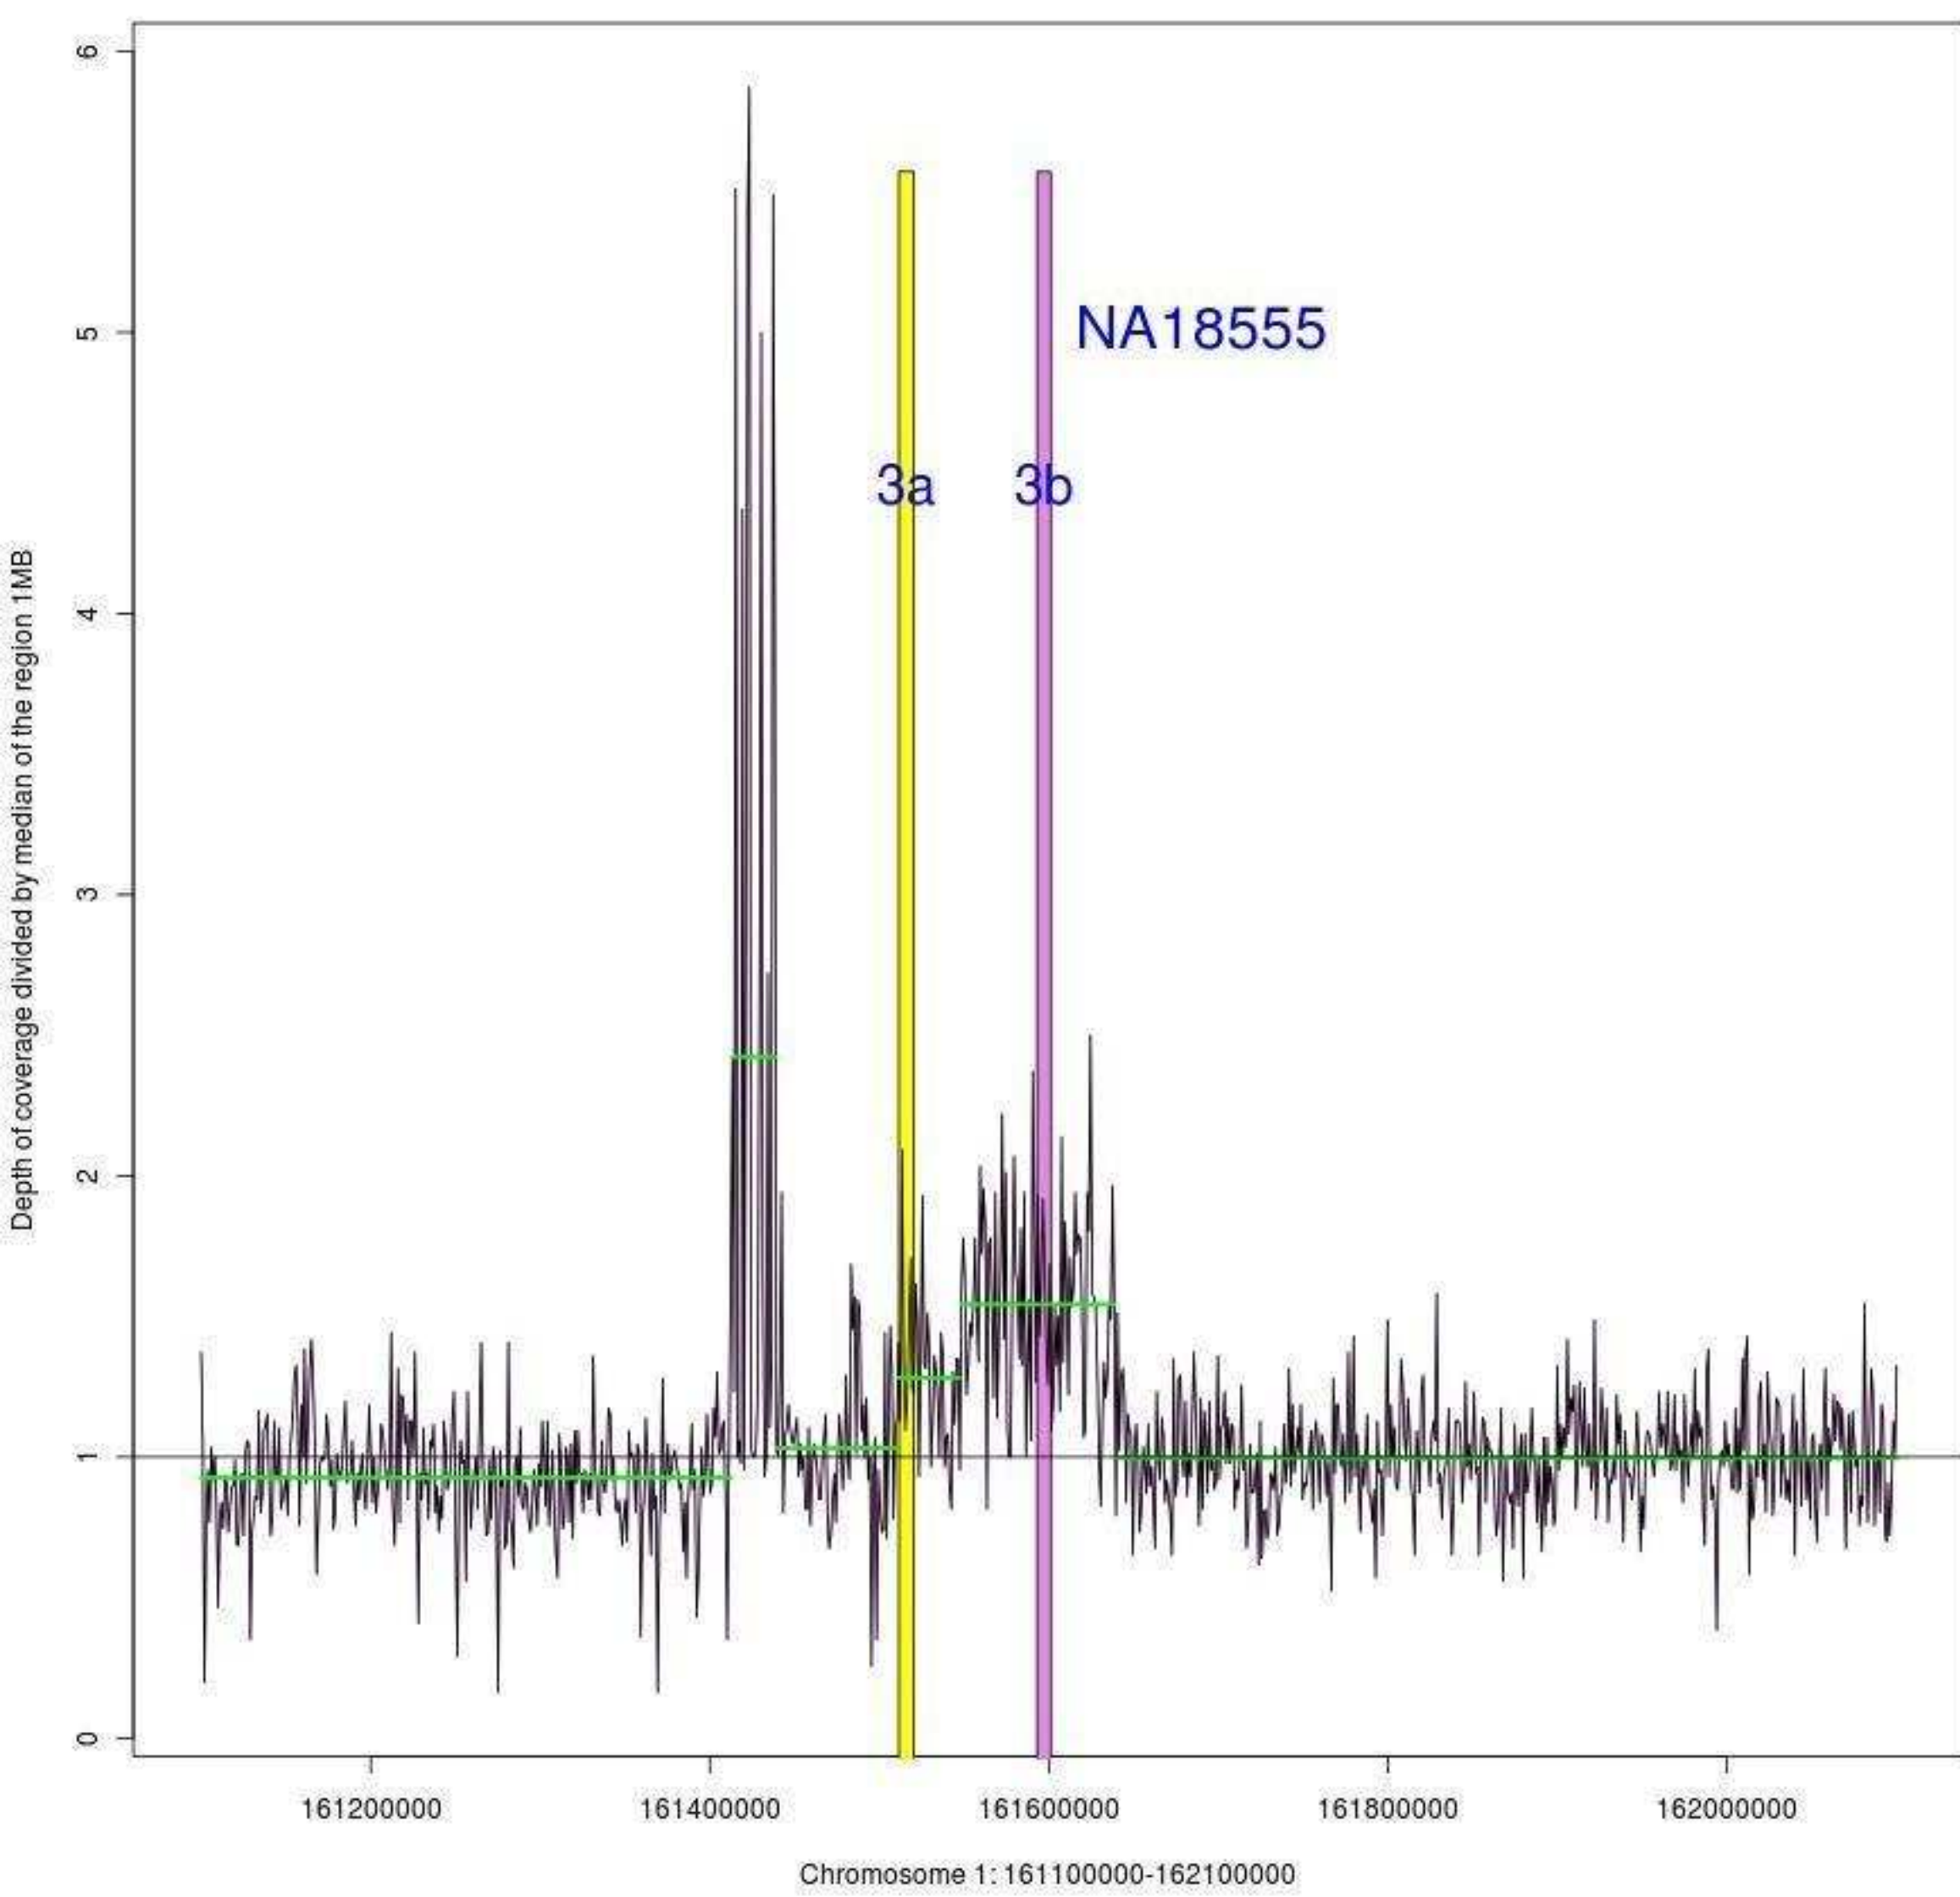

NA18555

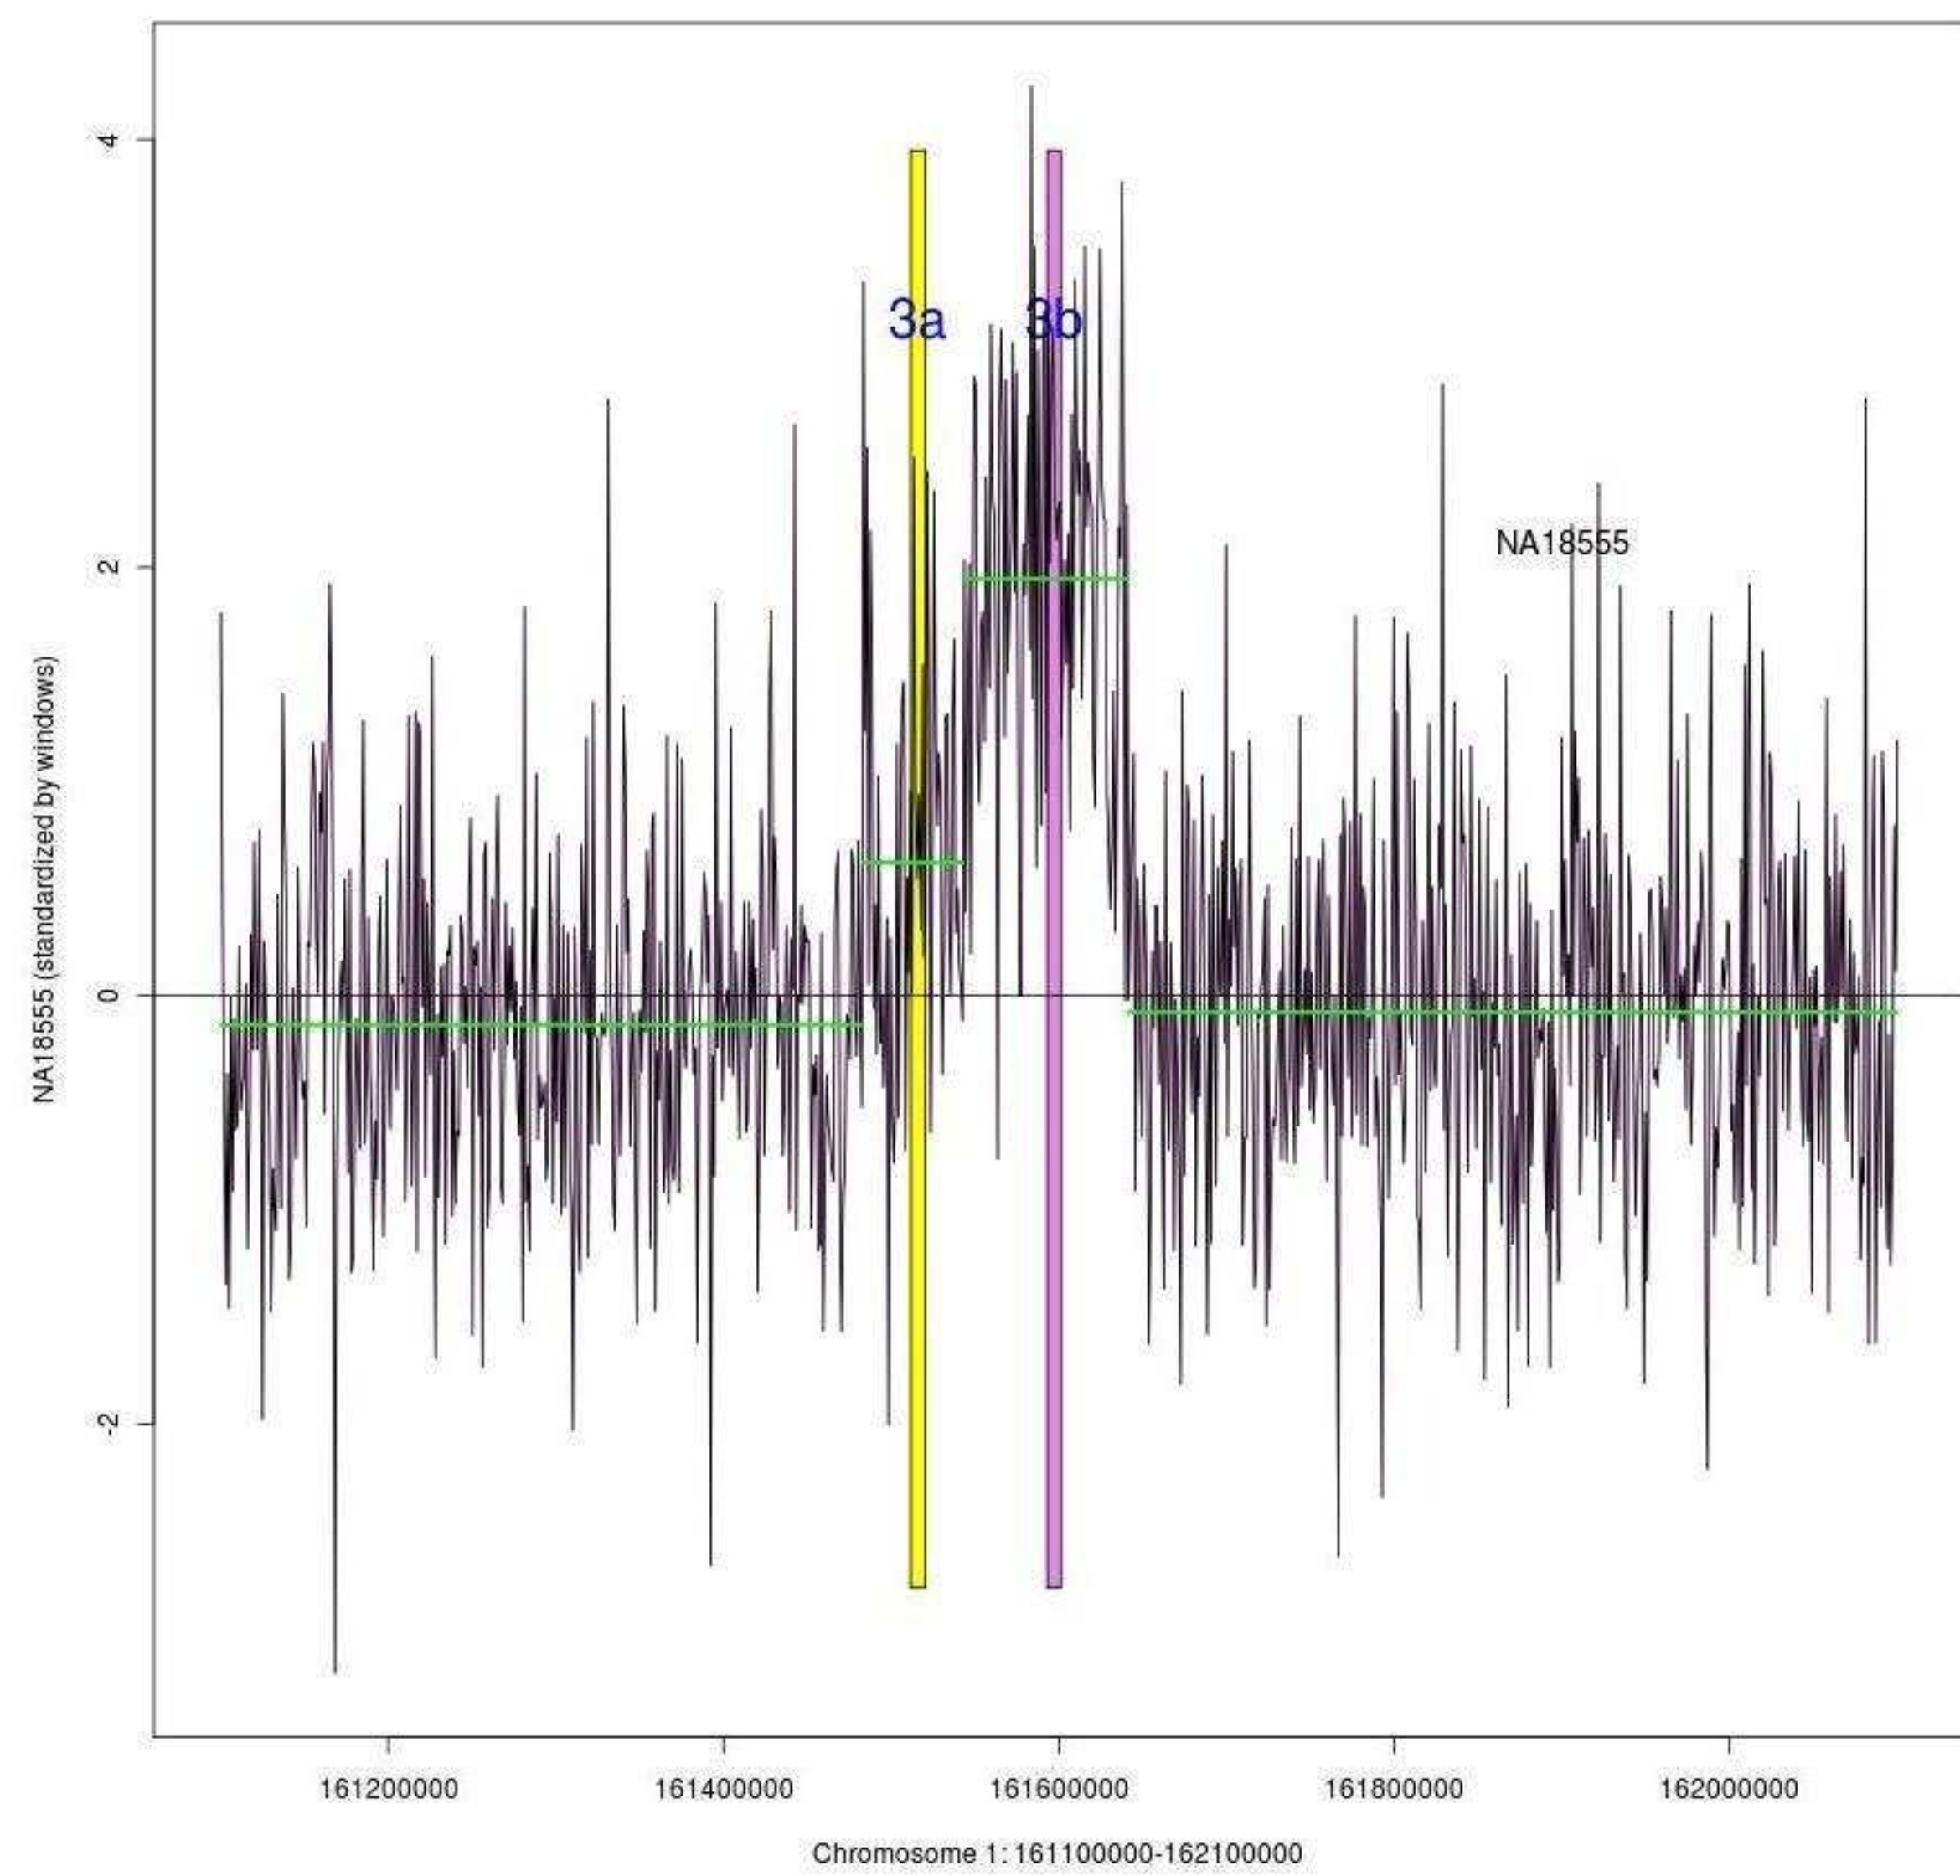



NA18558

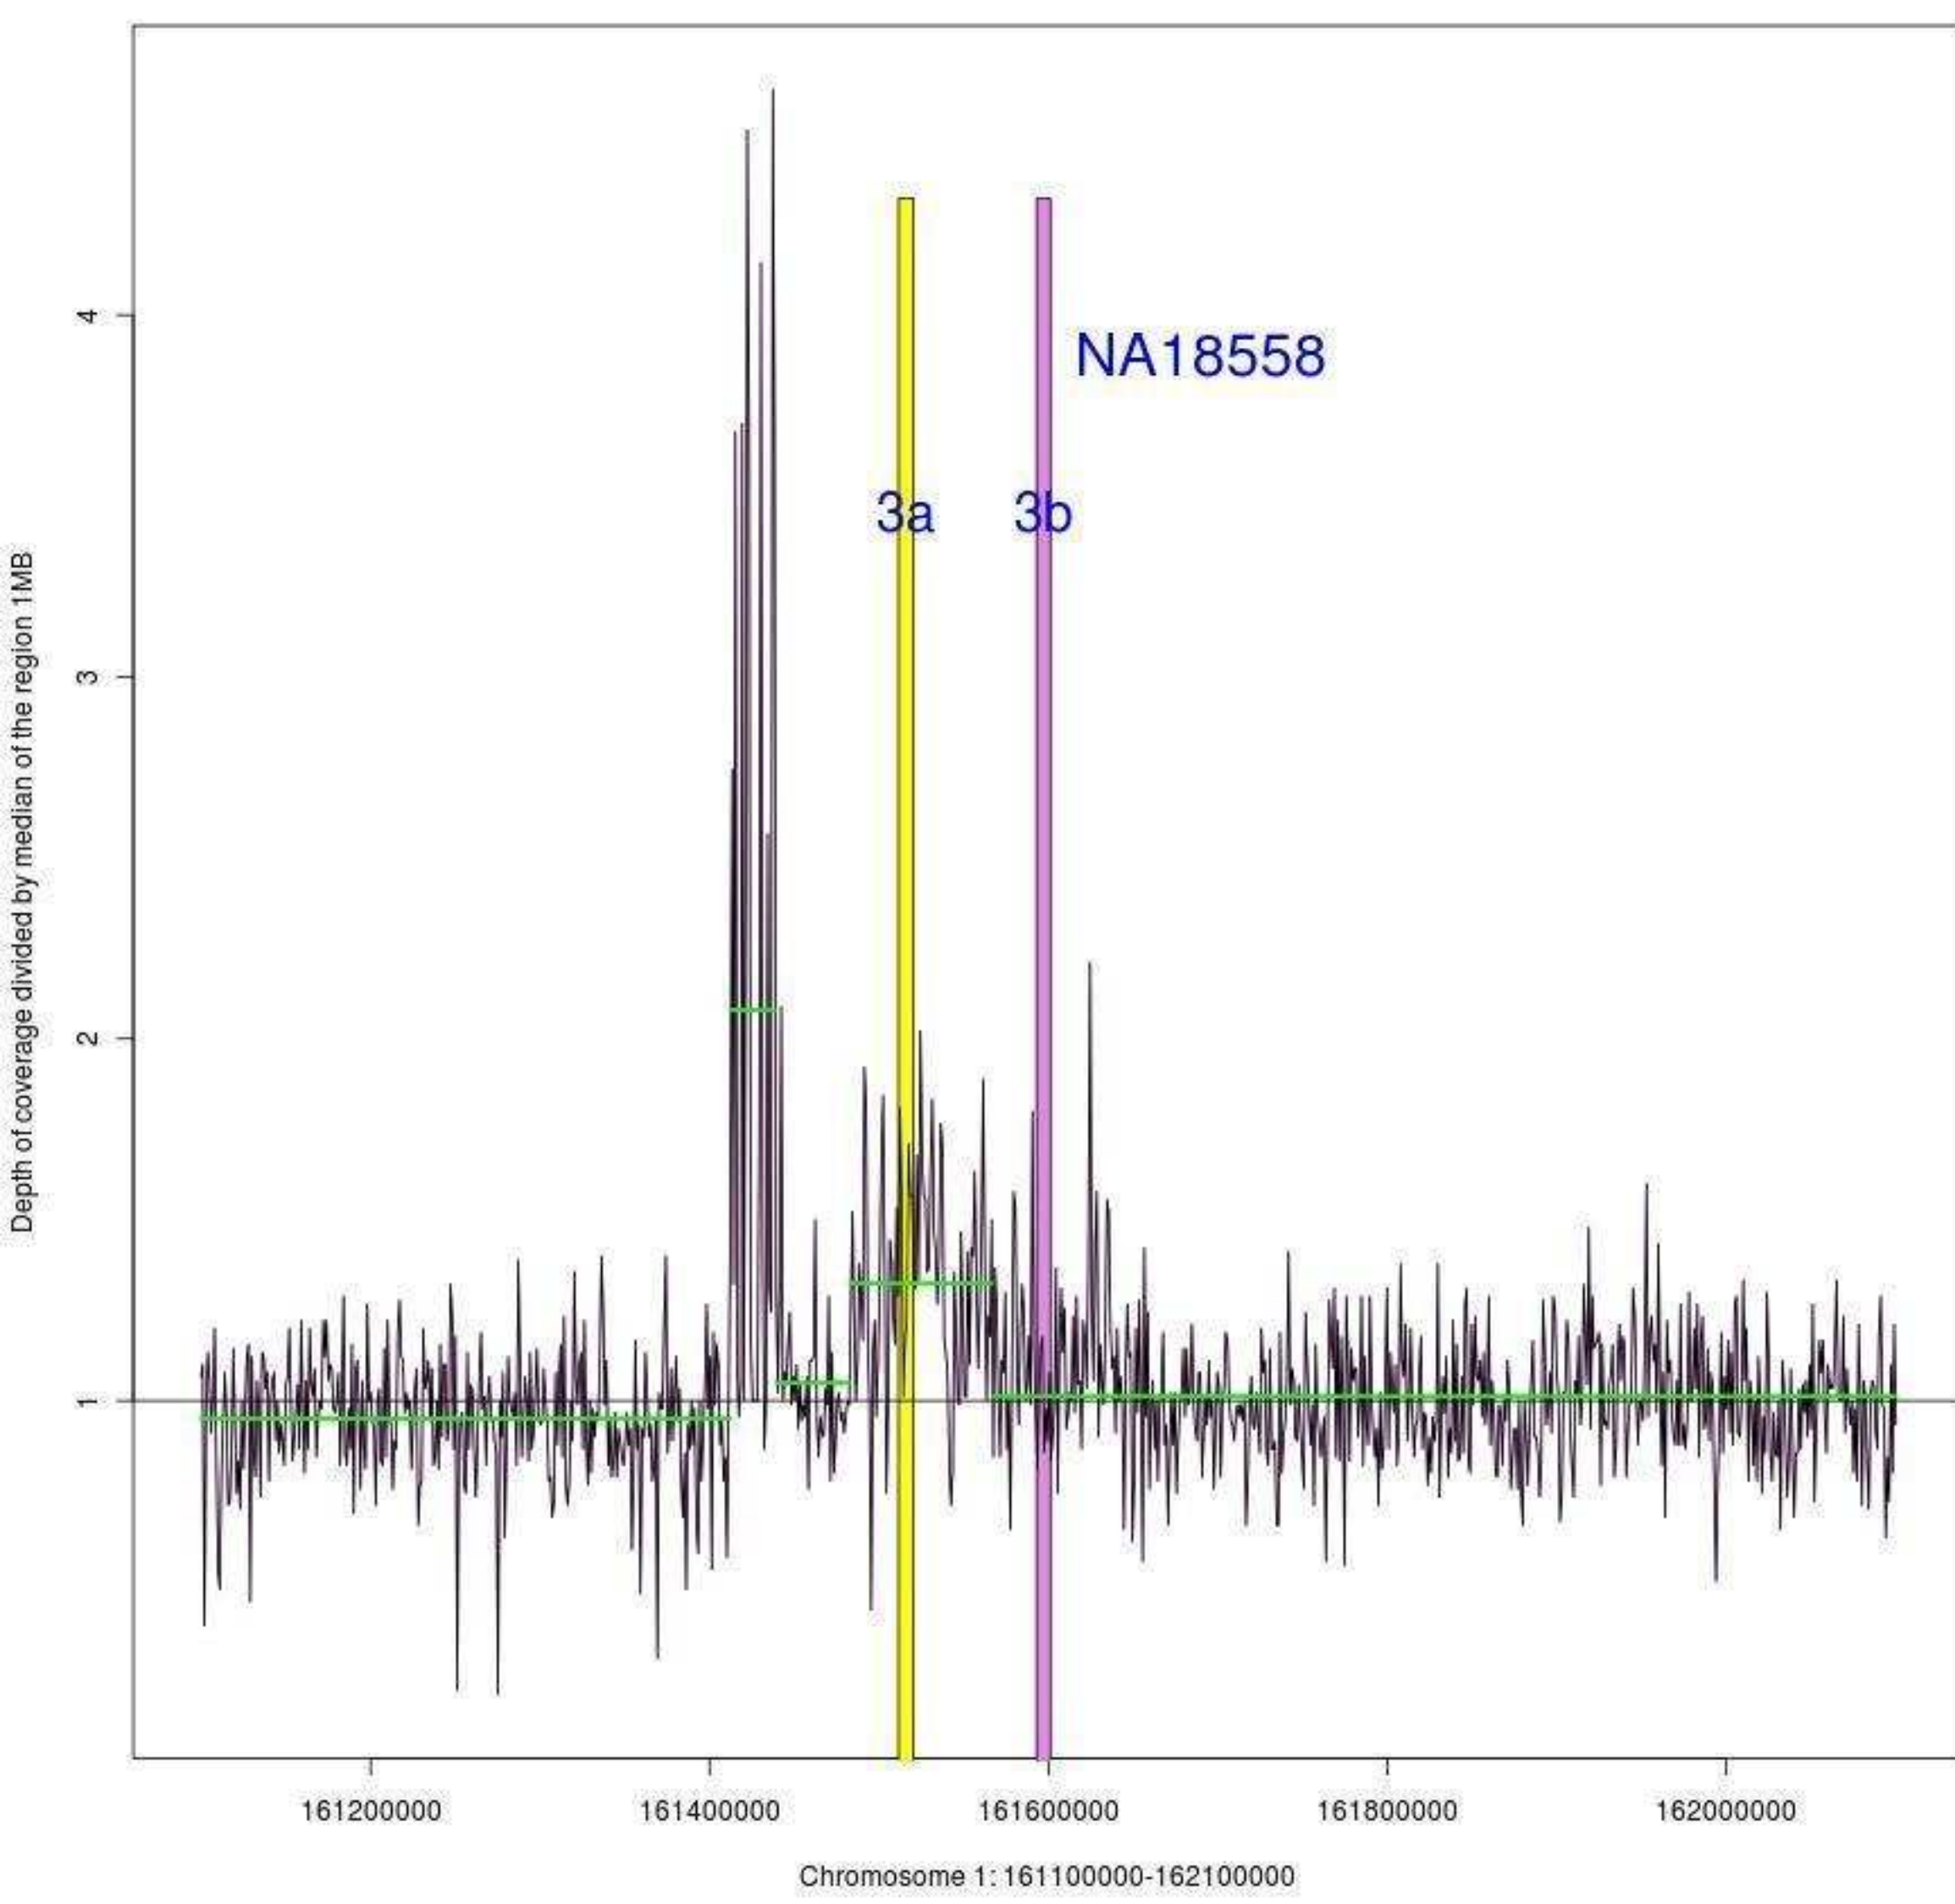

NA18558

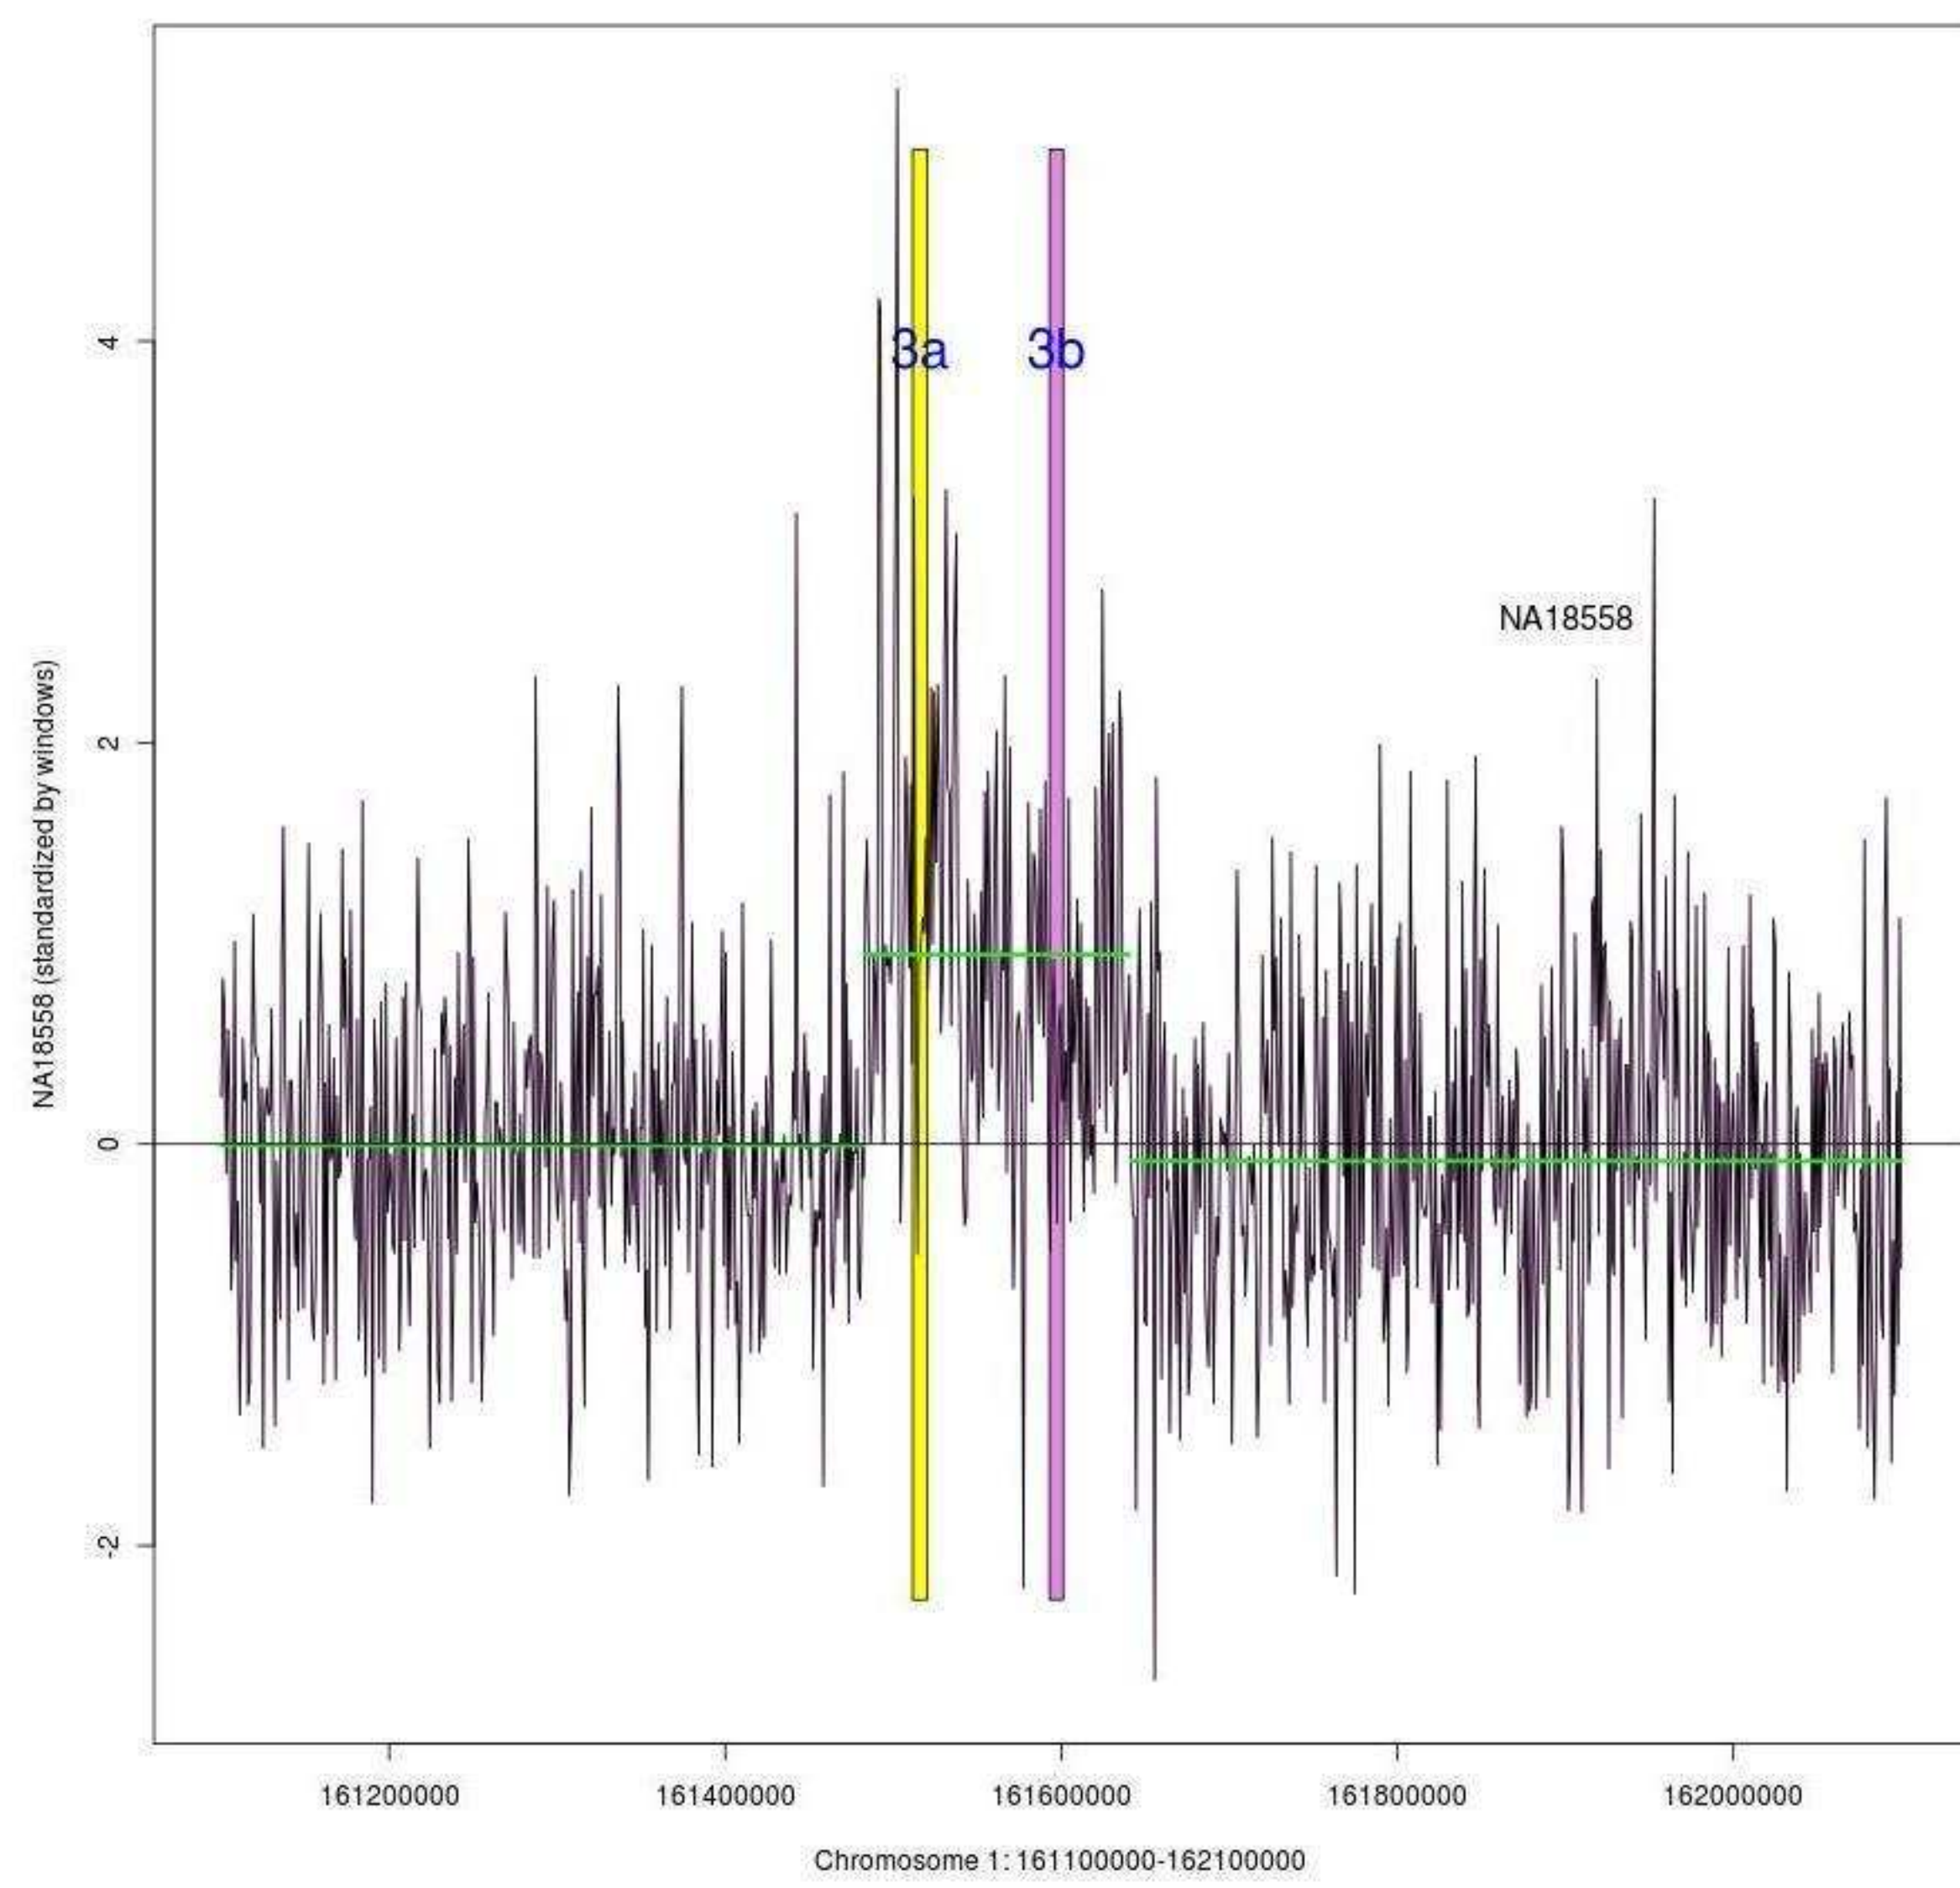

NA18570

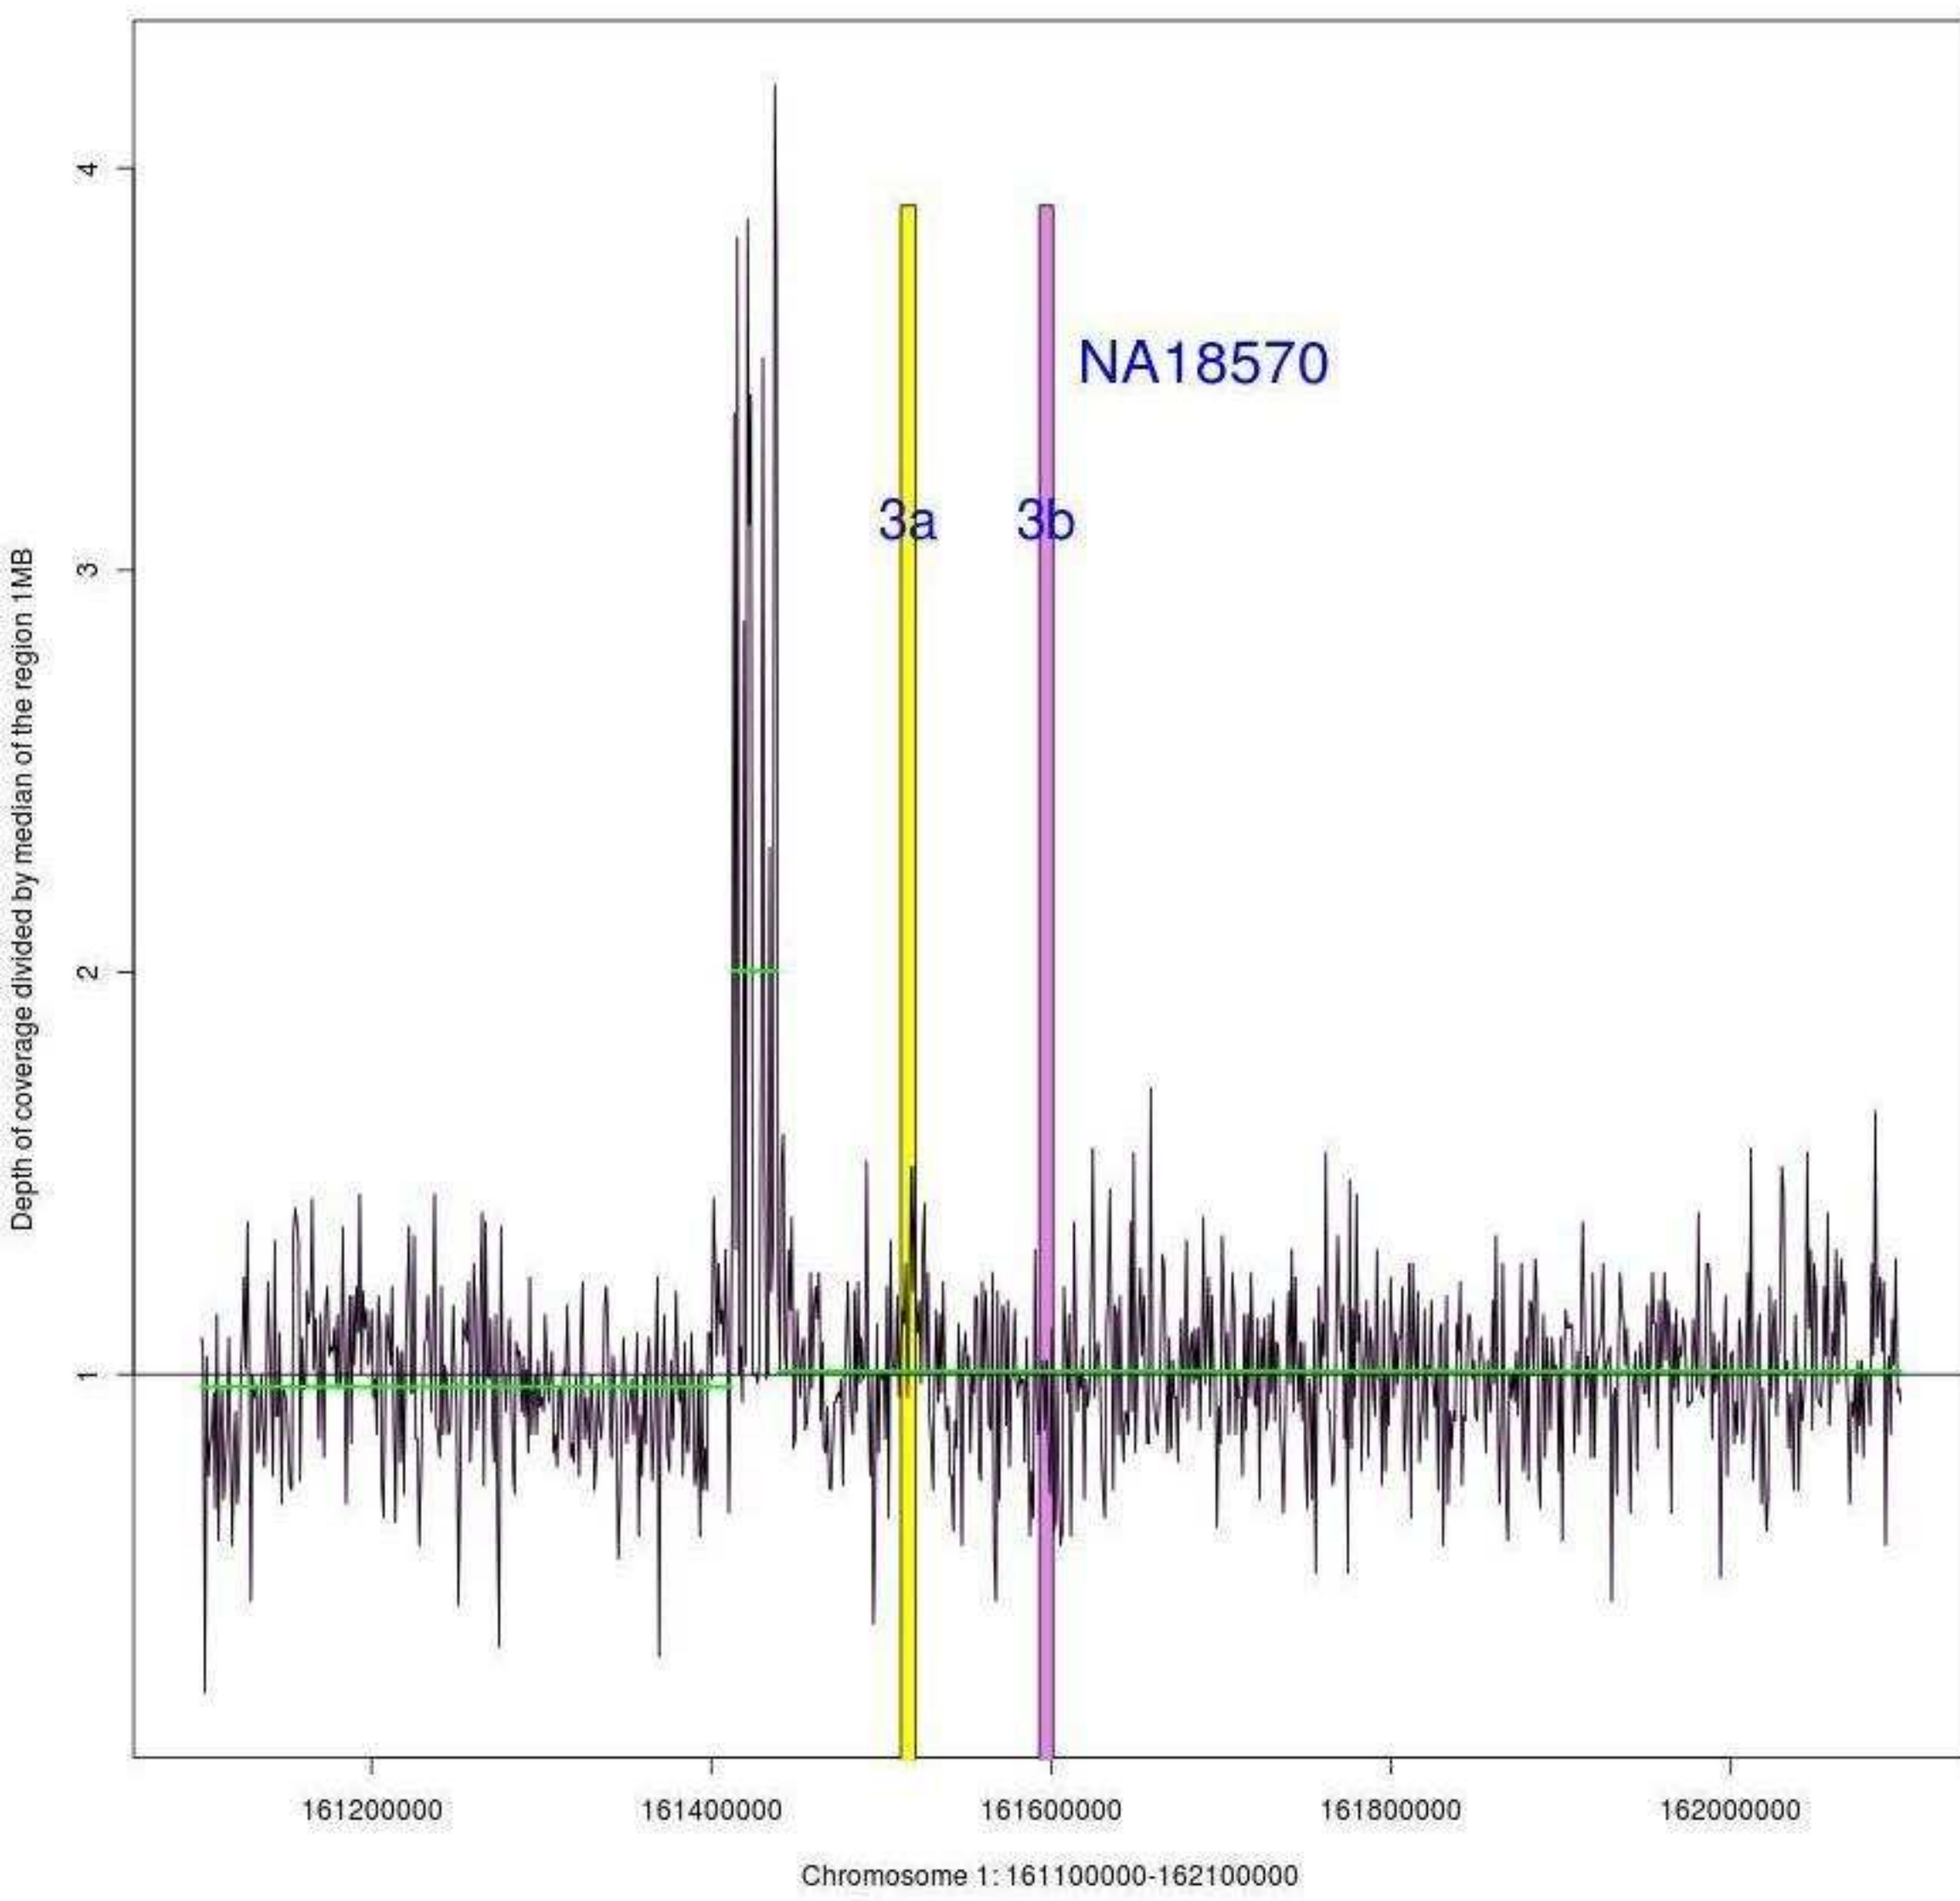

NA18570

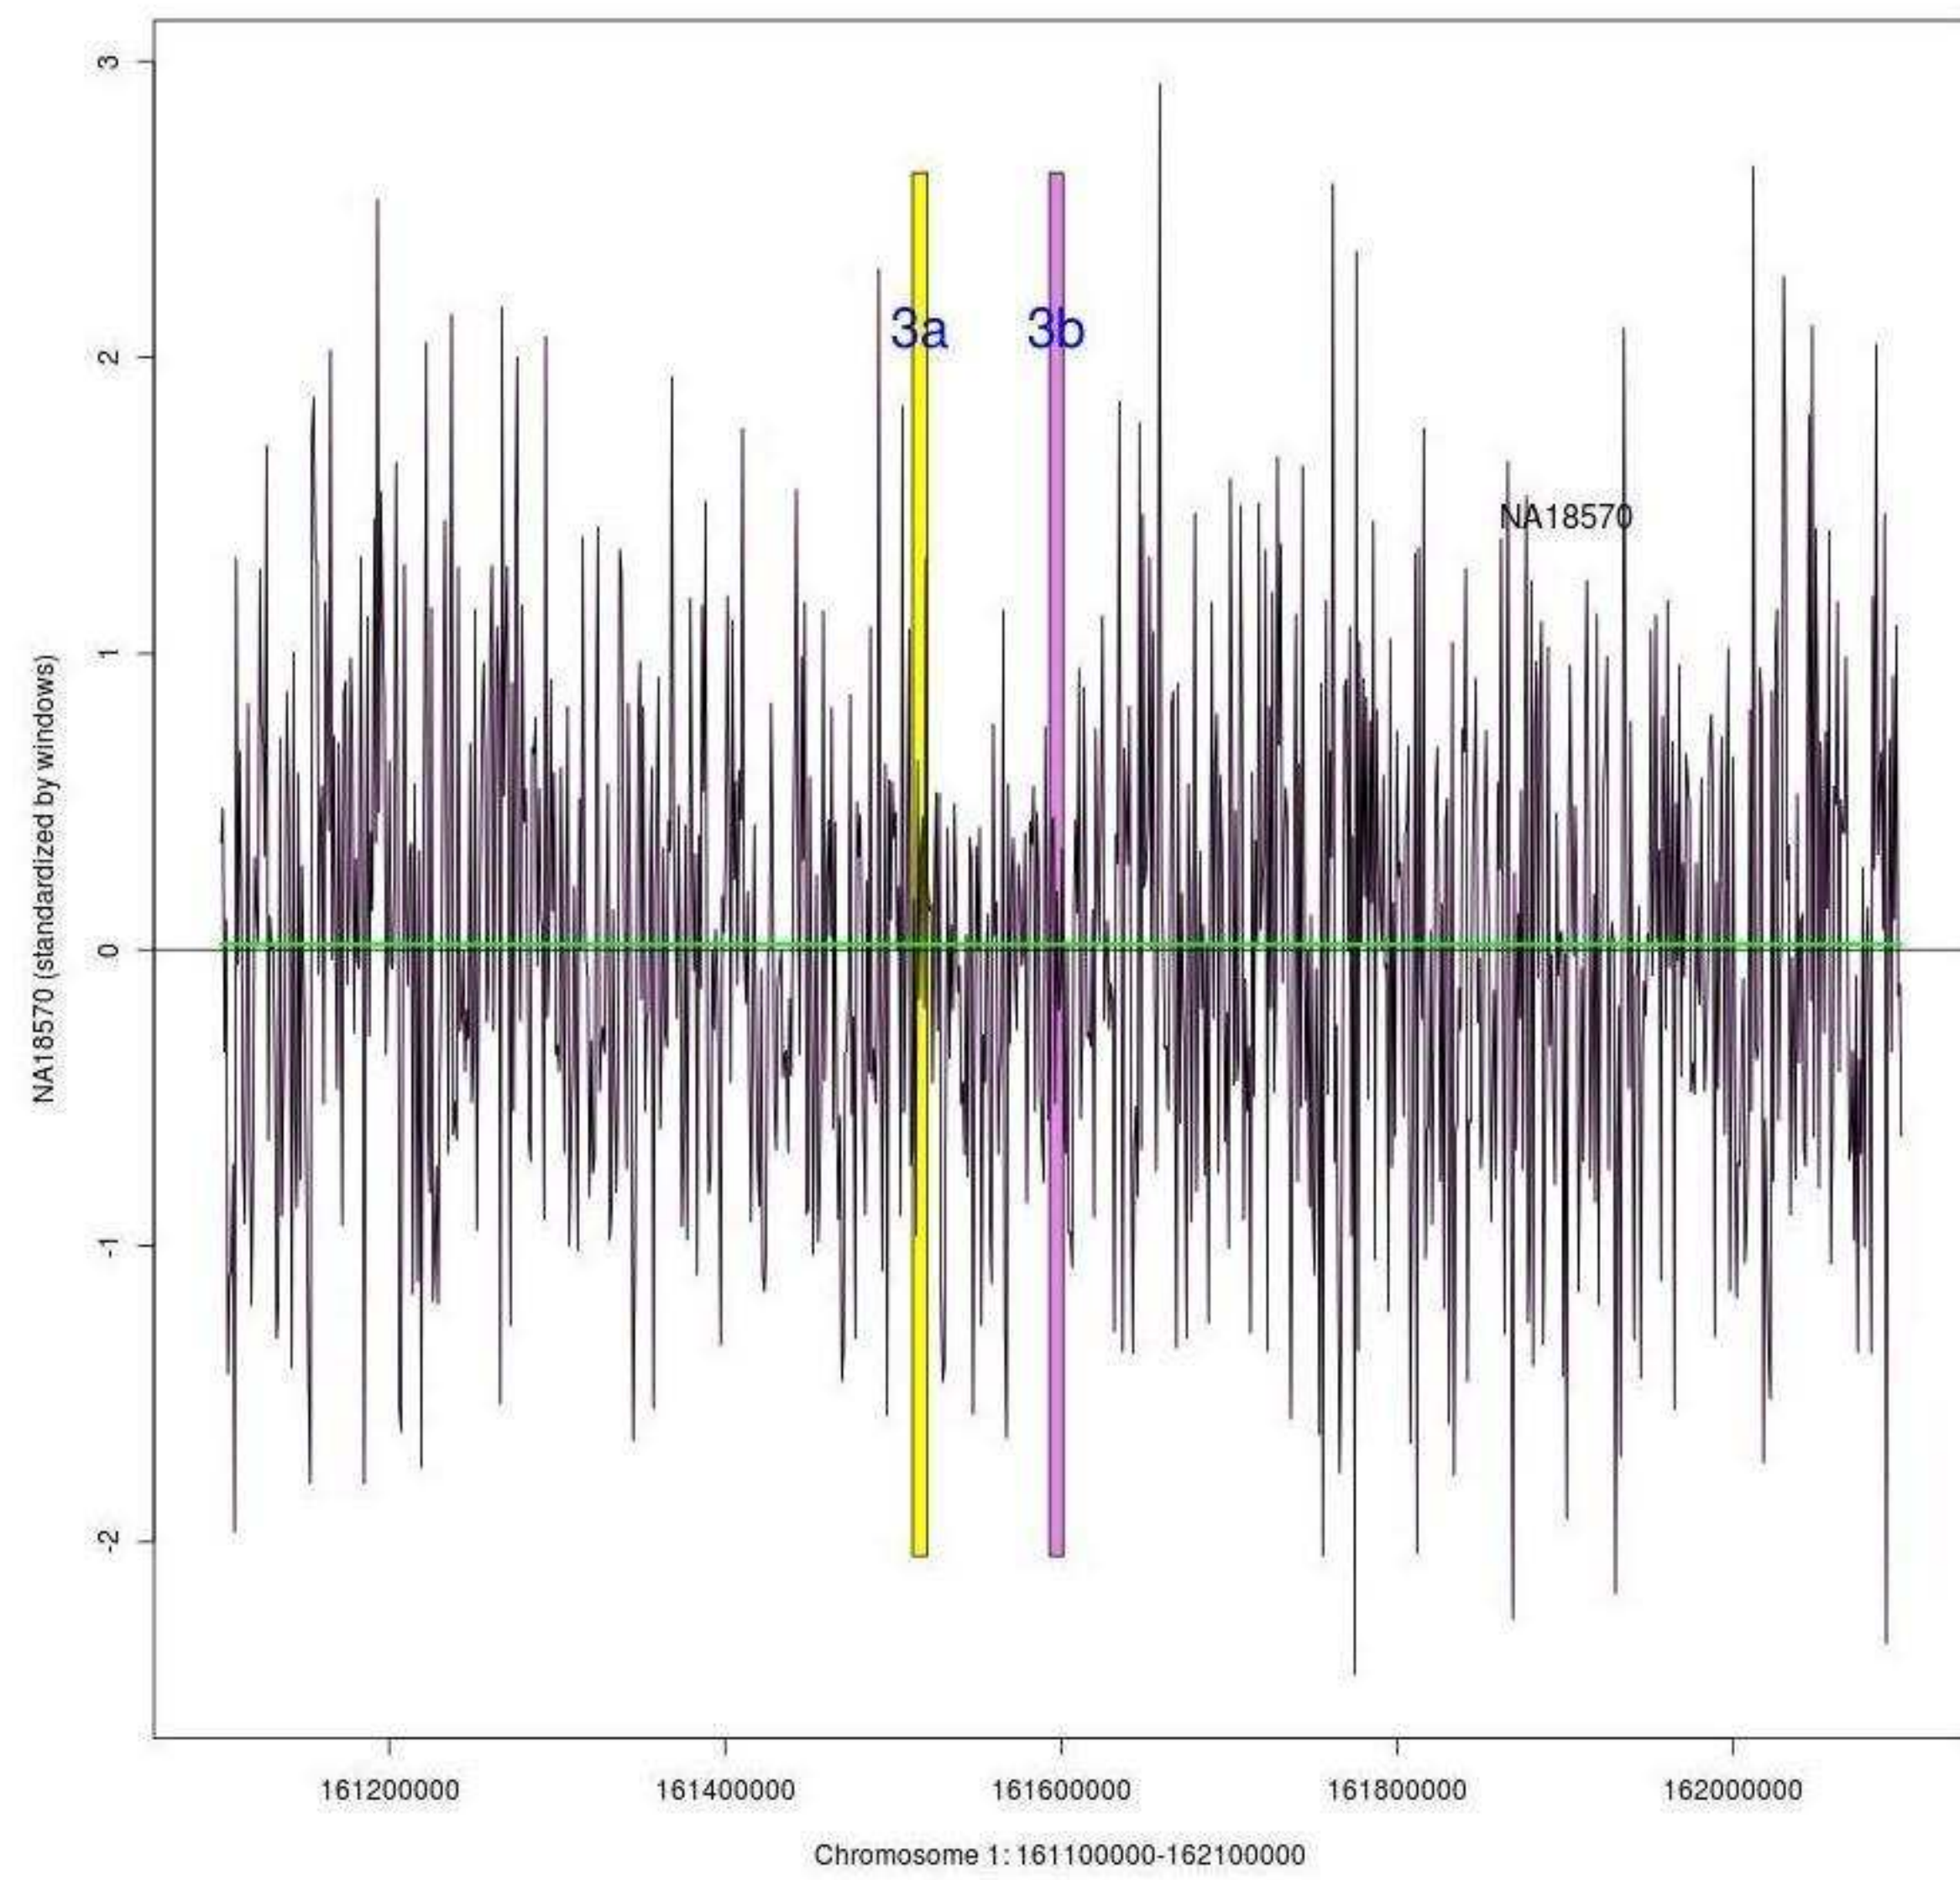

NA18571

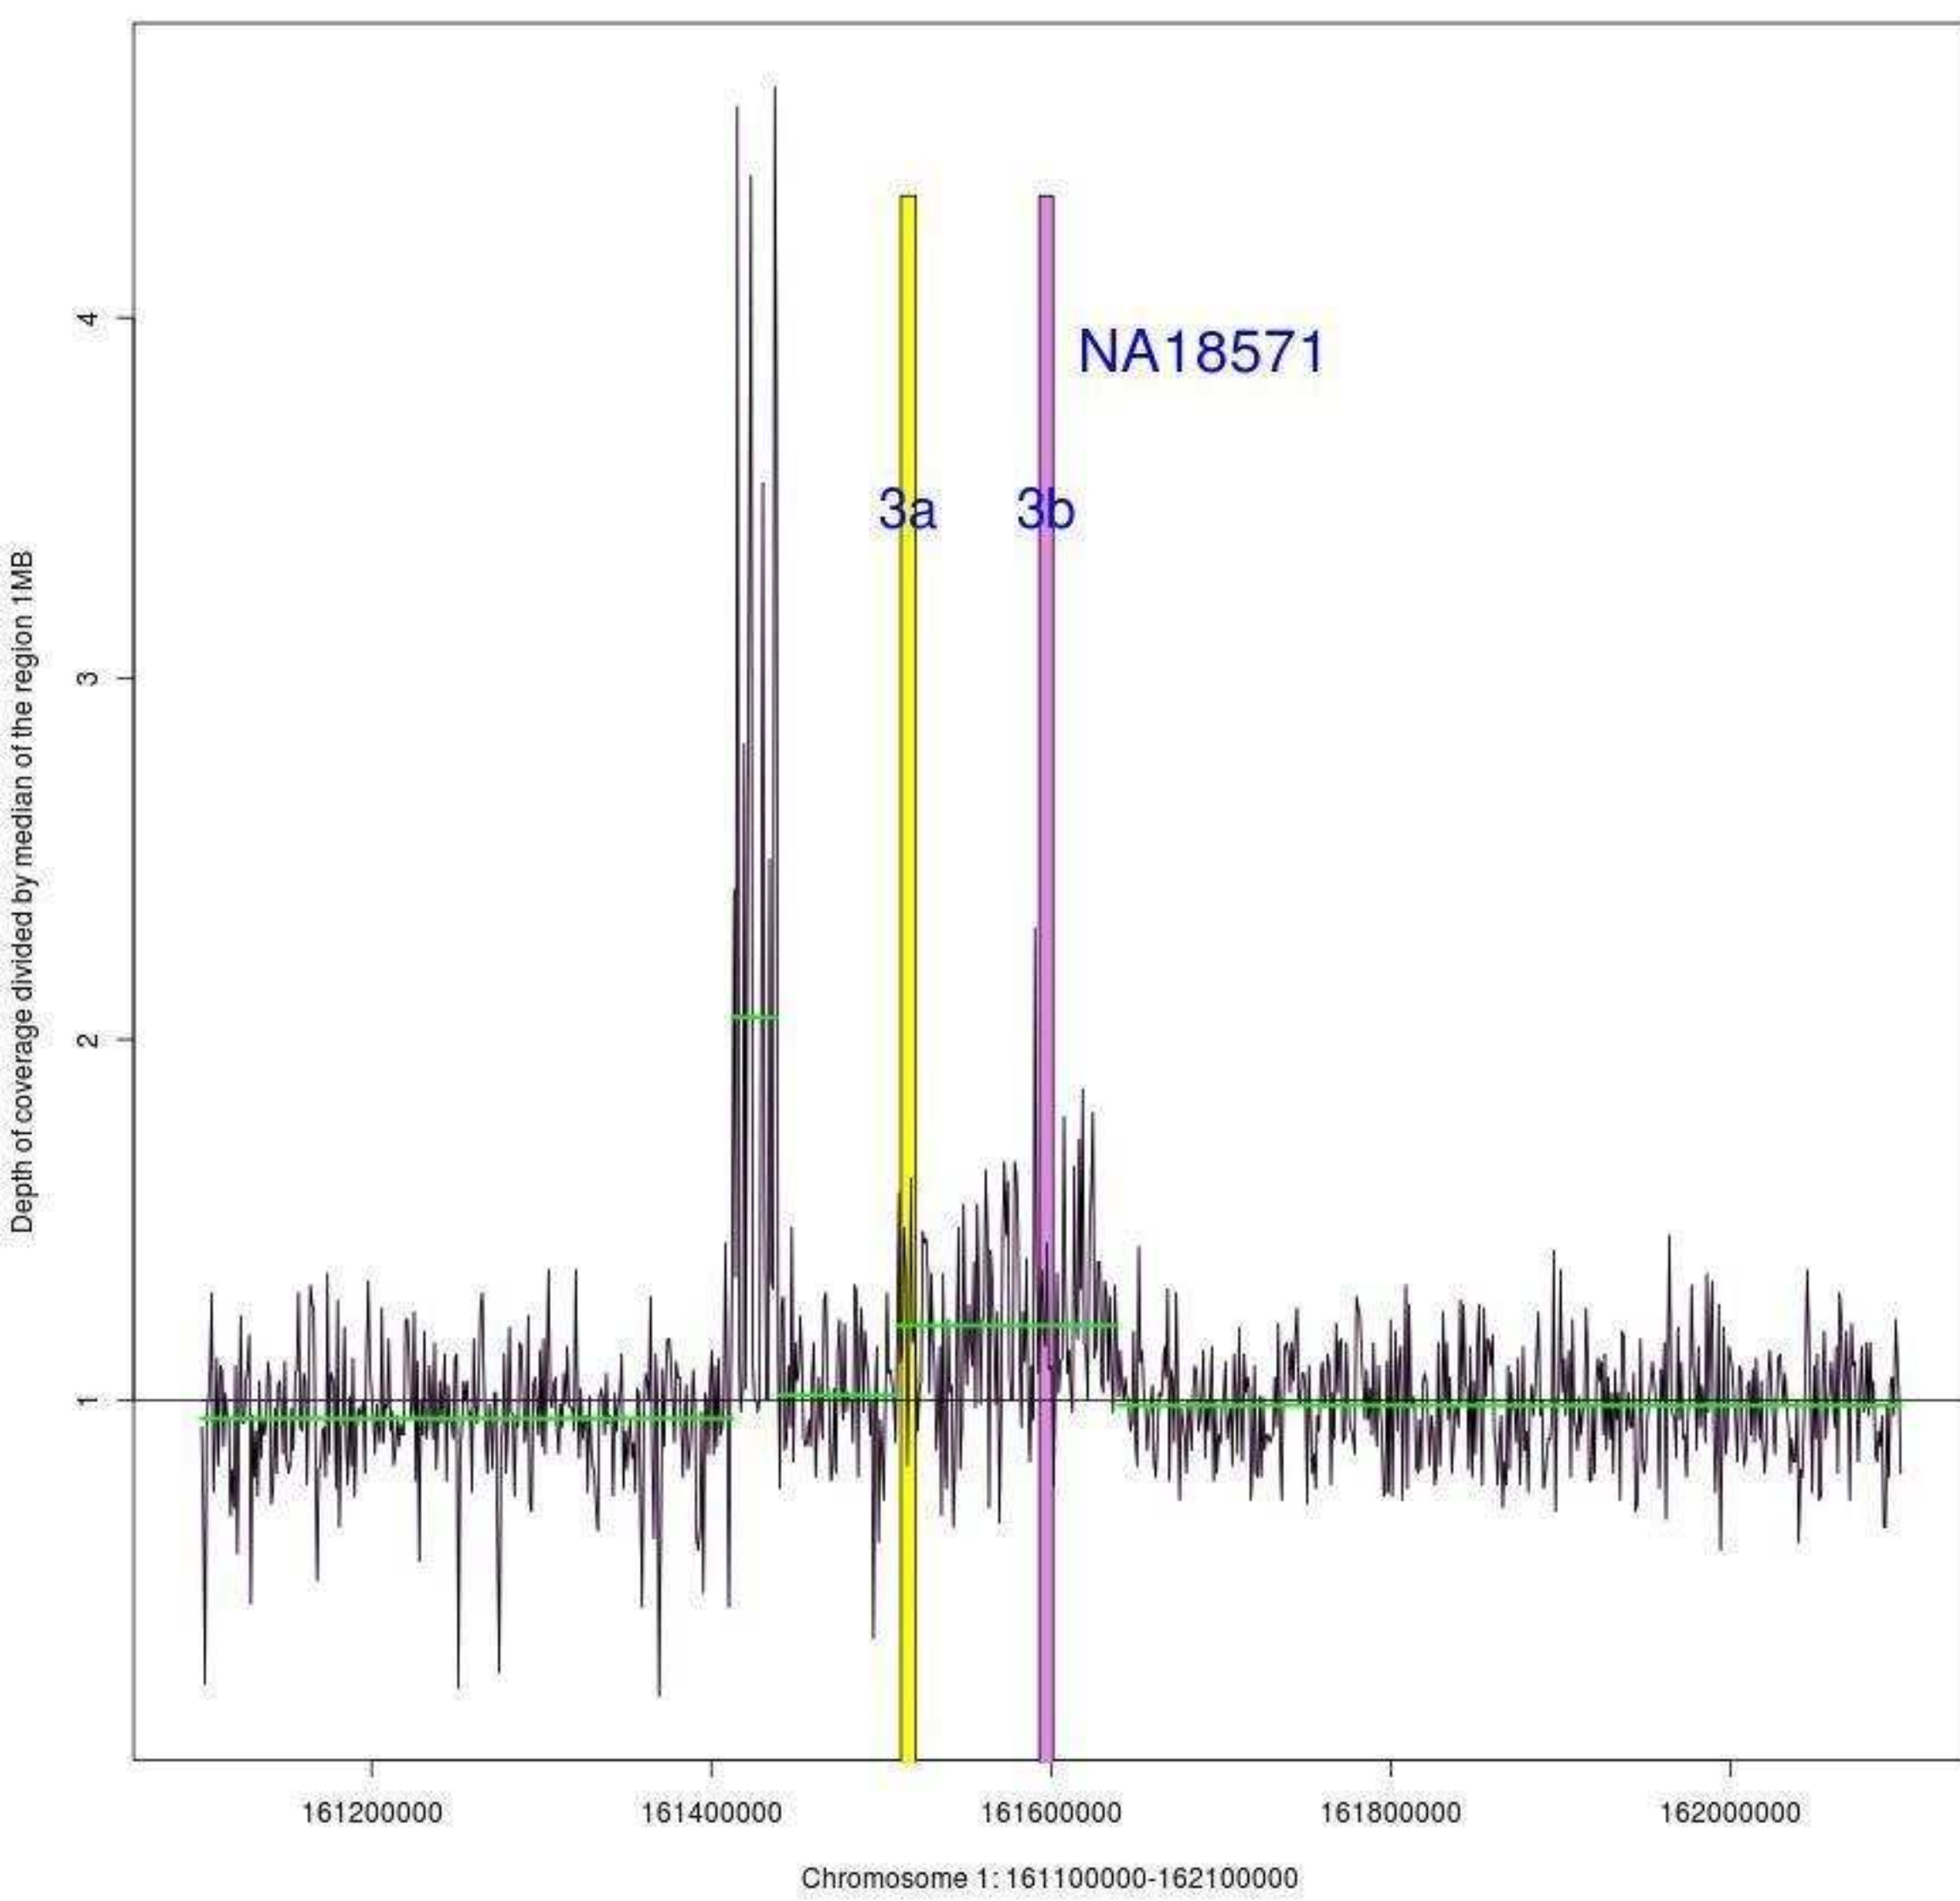

NA18571

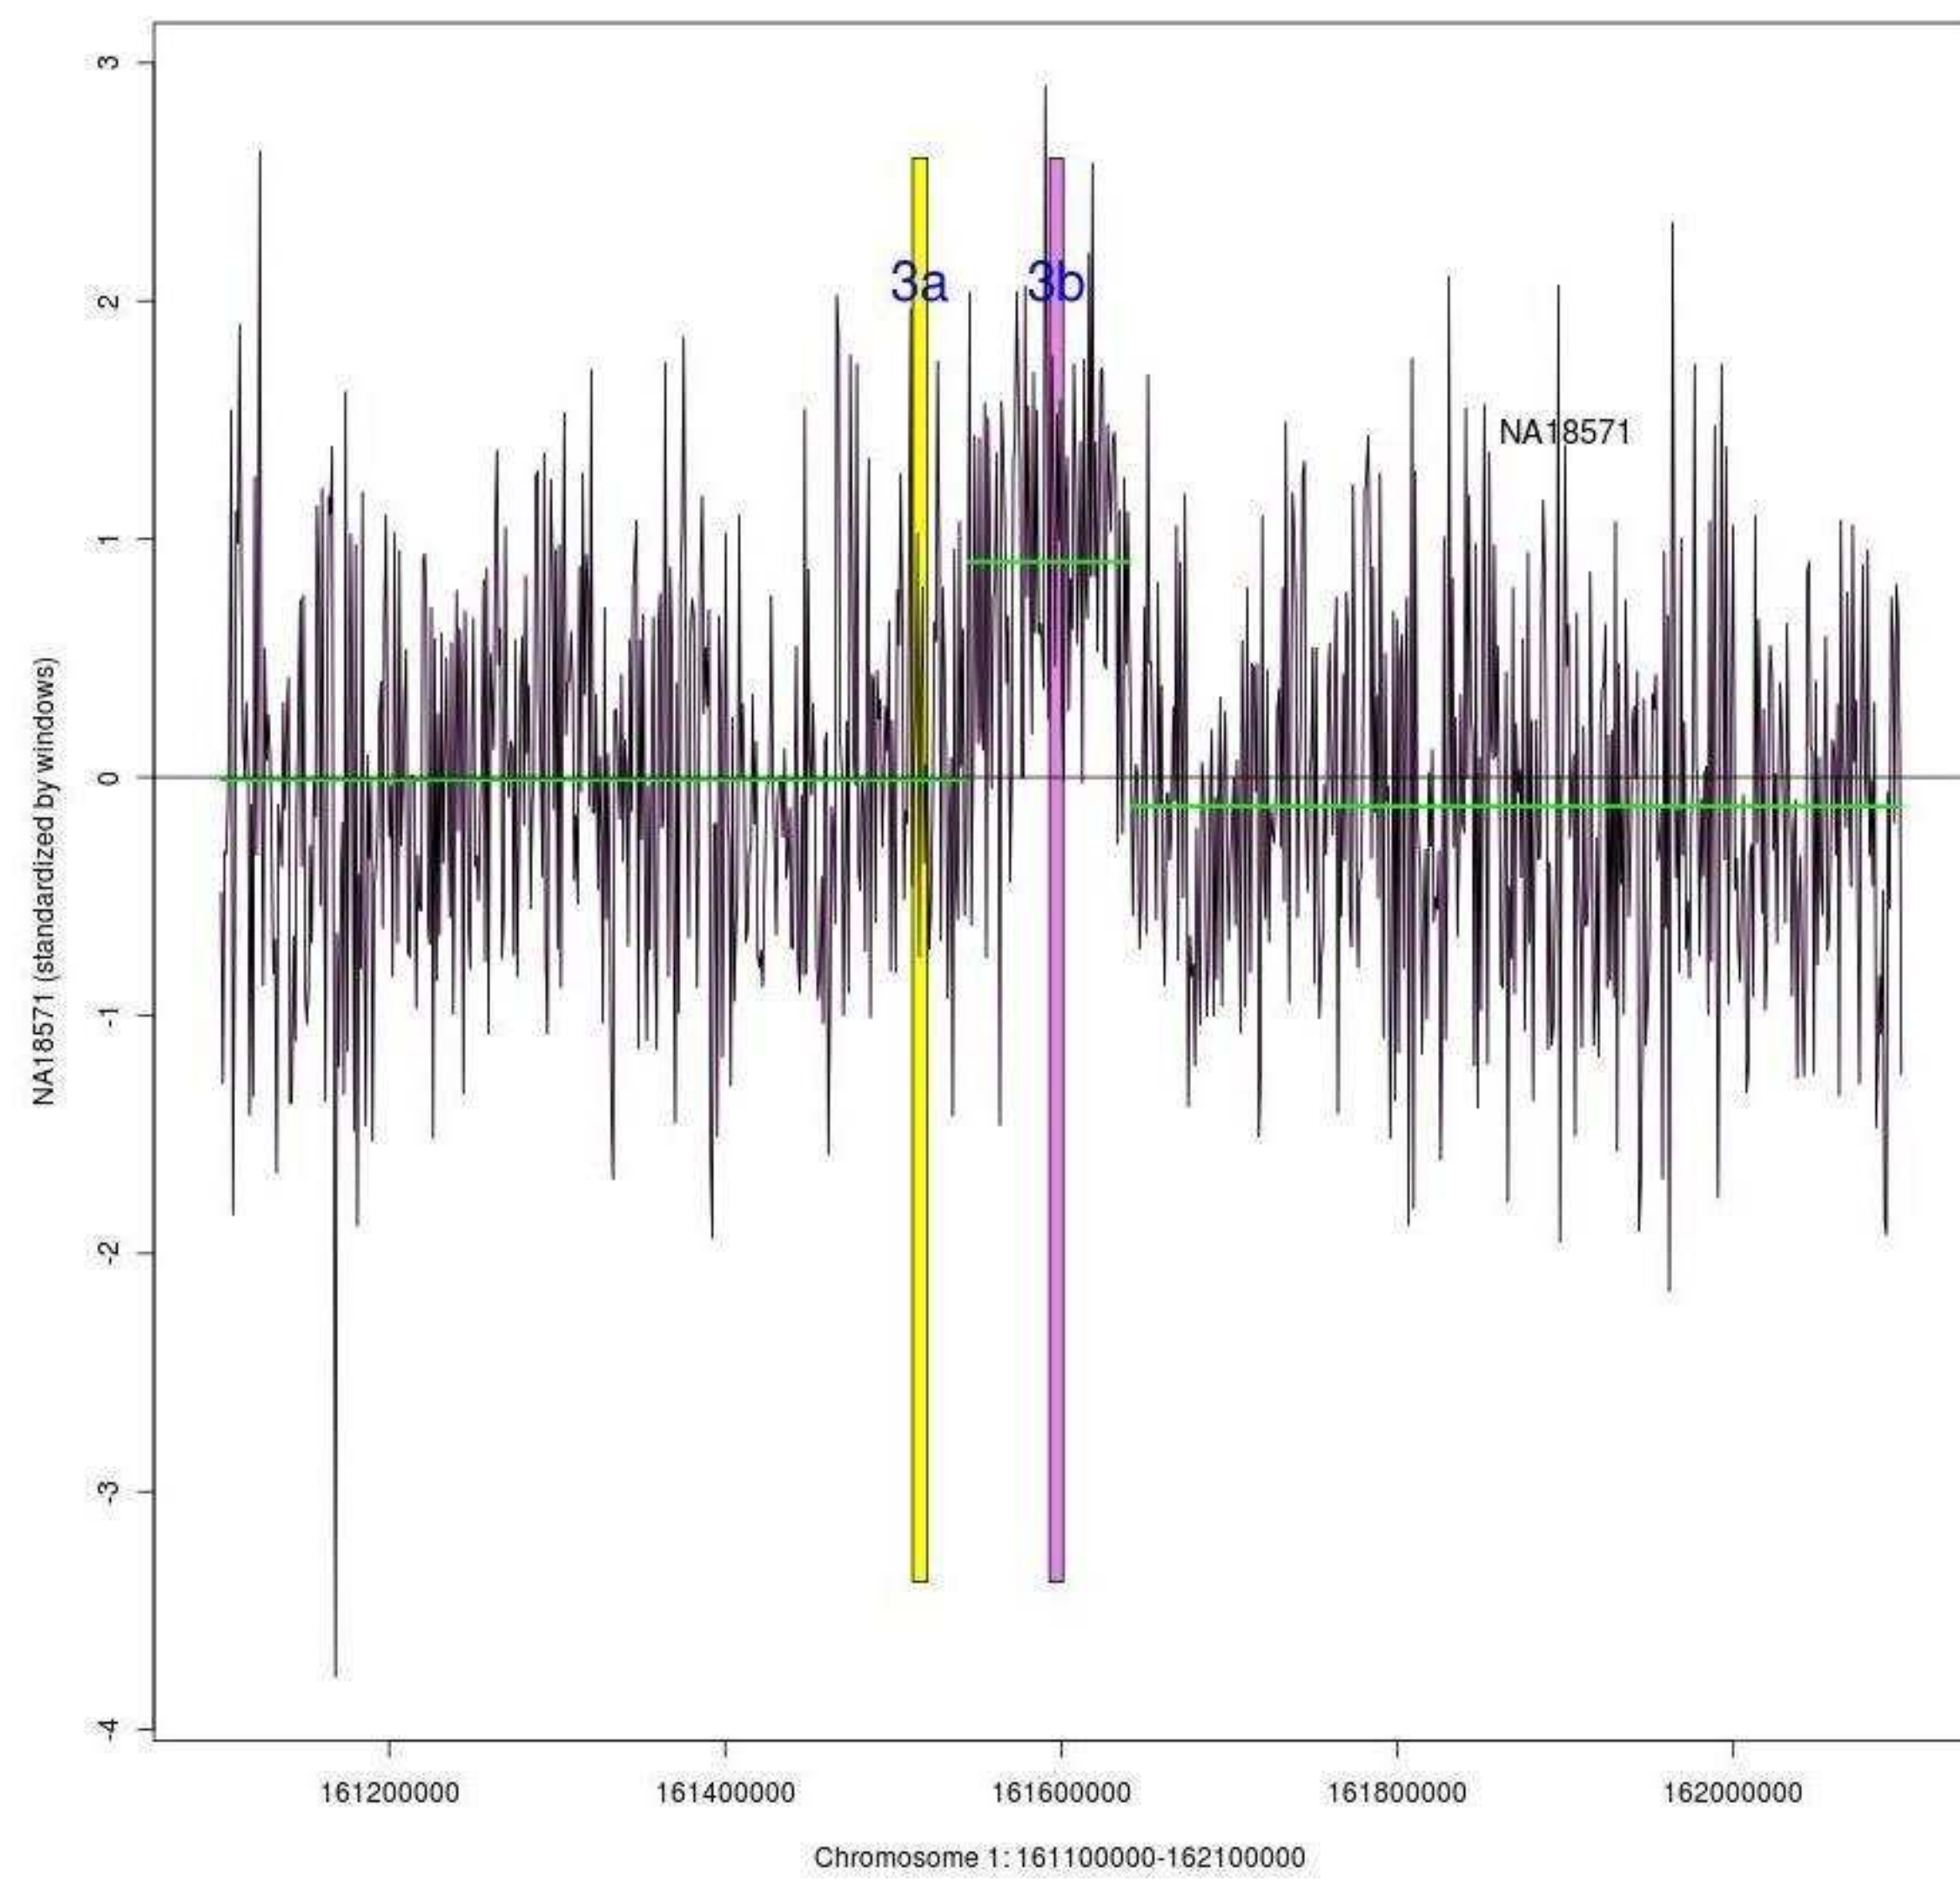



NA18573

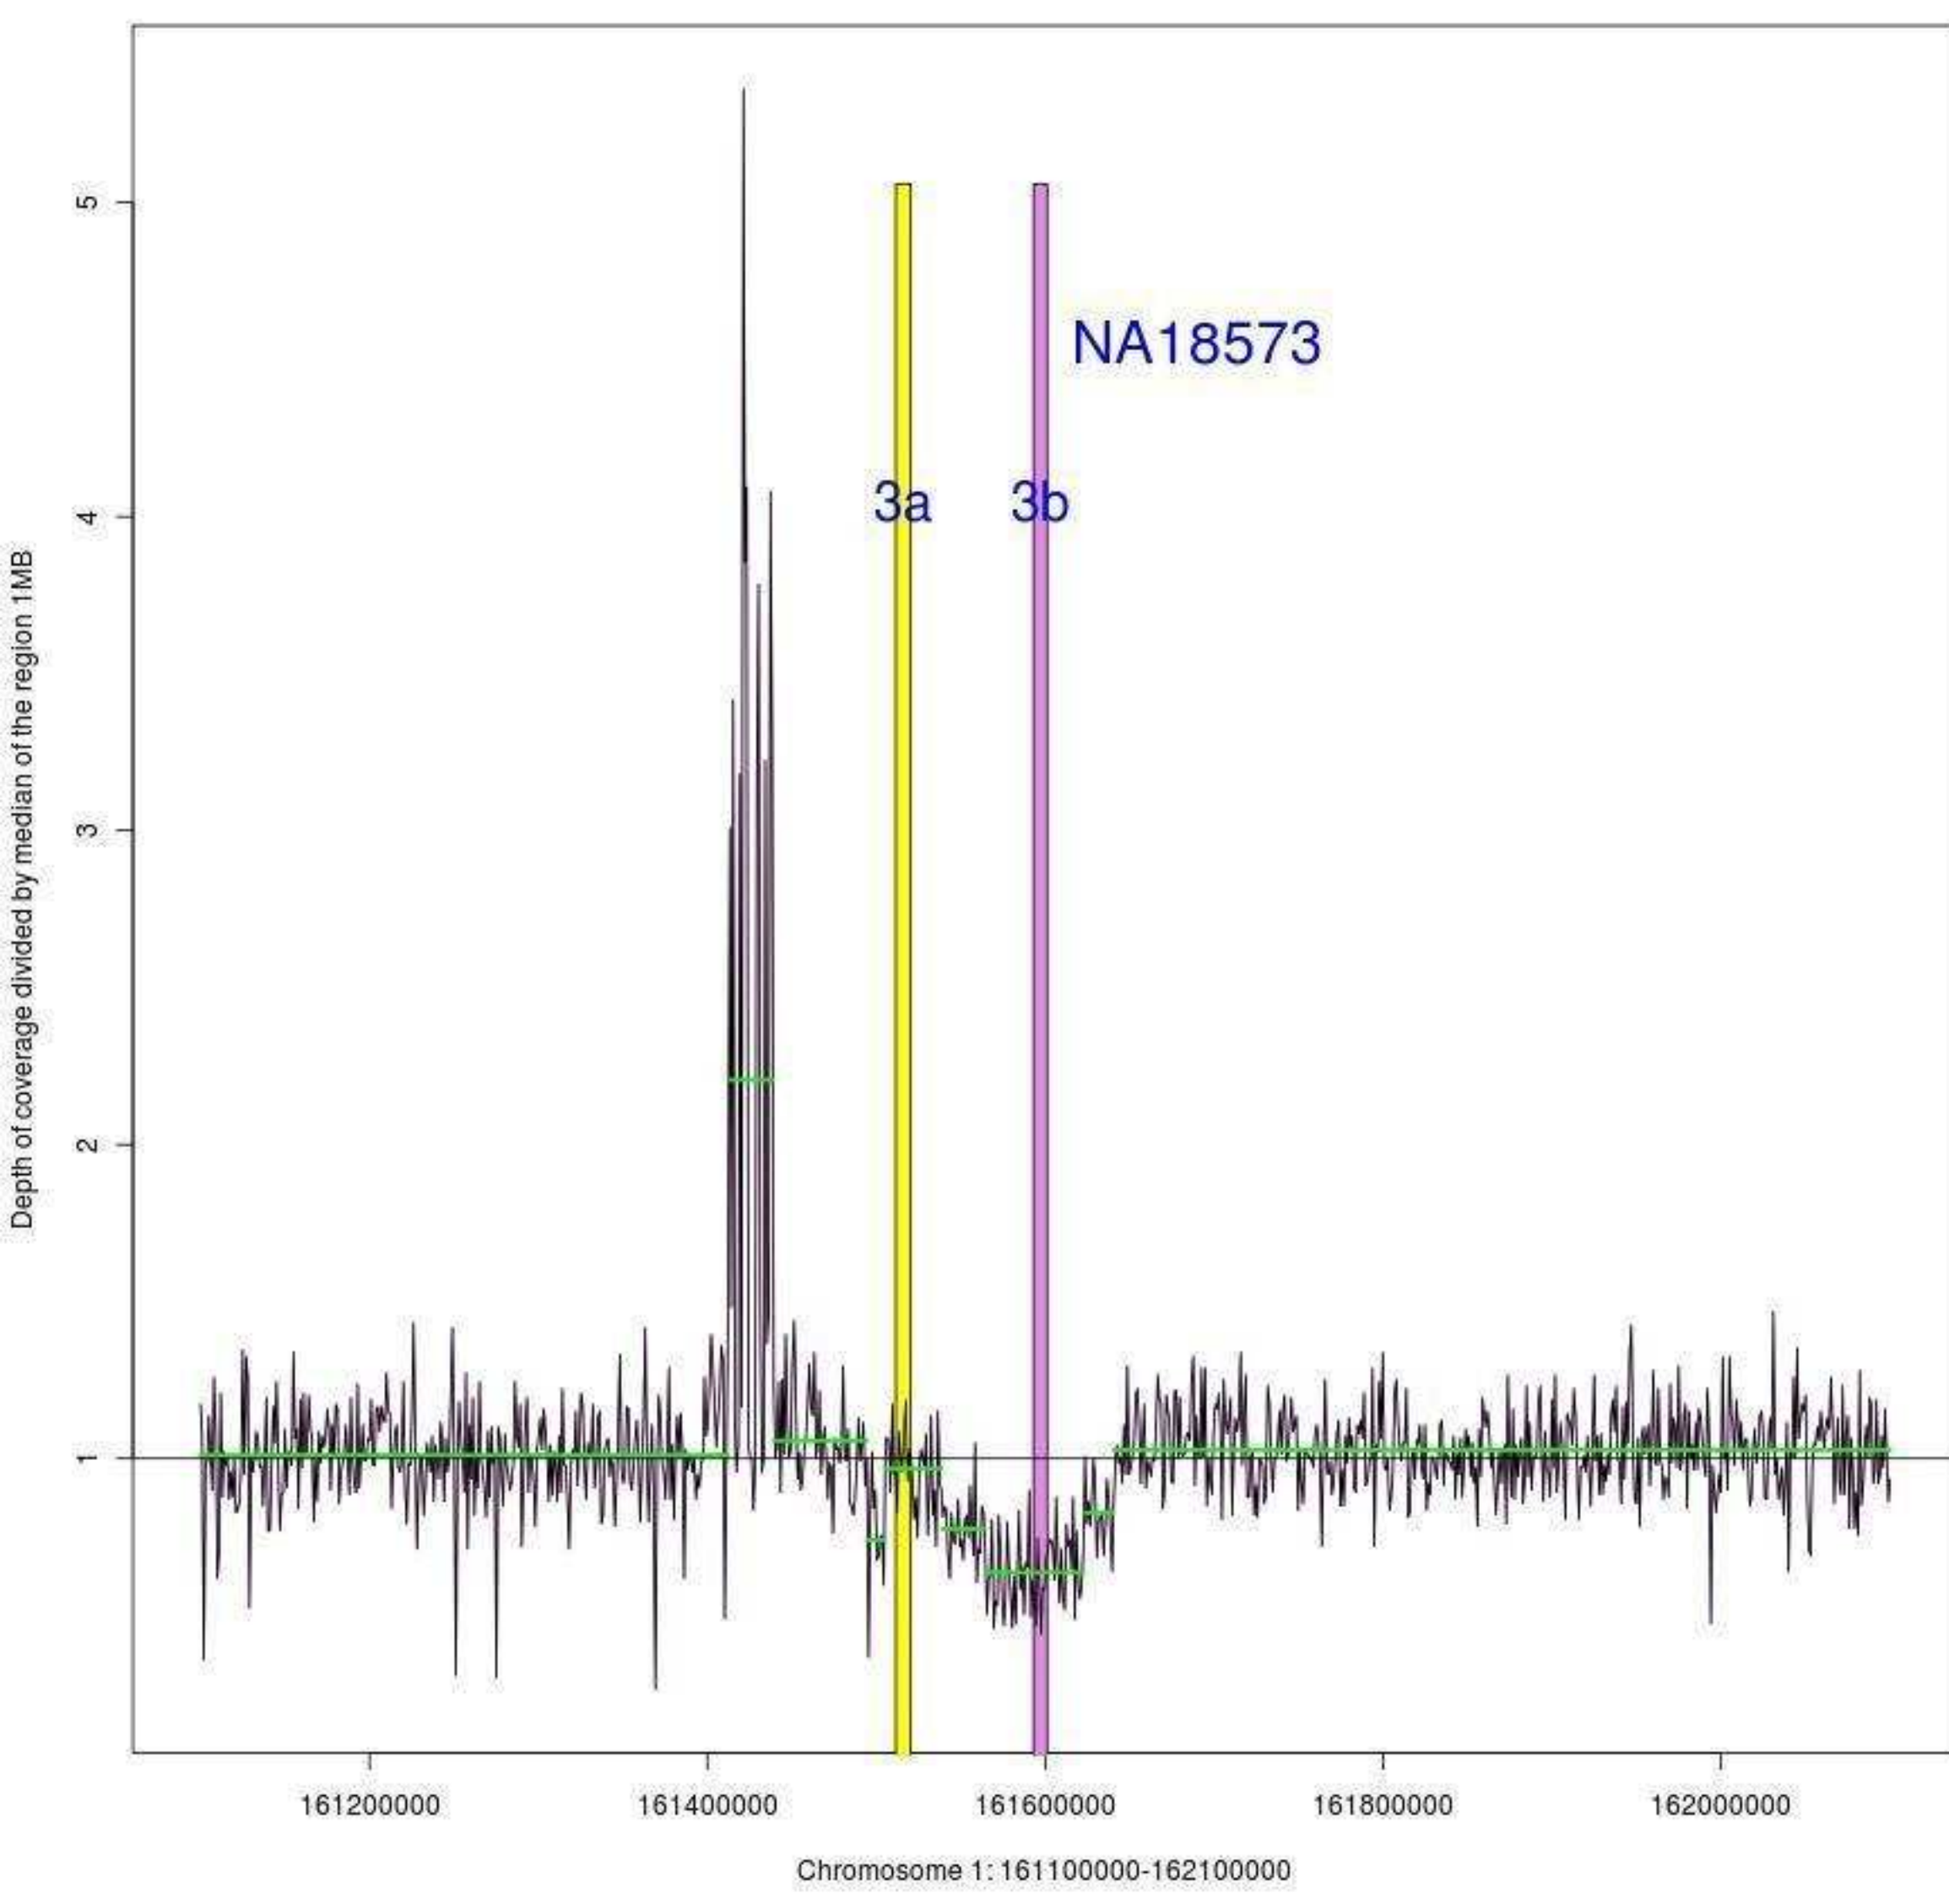

NA18573

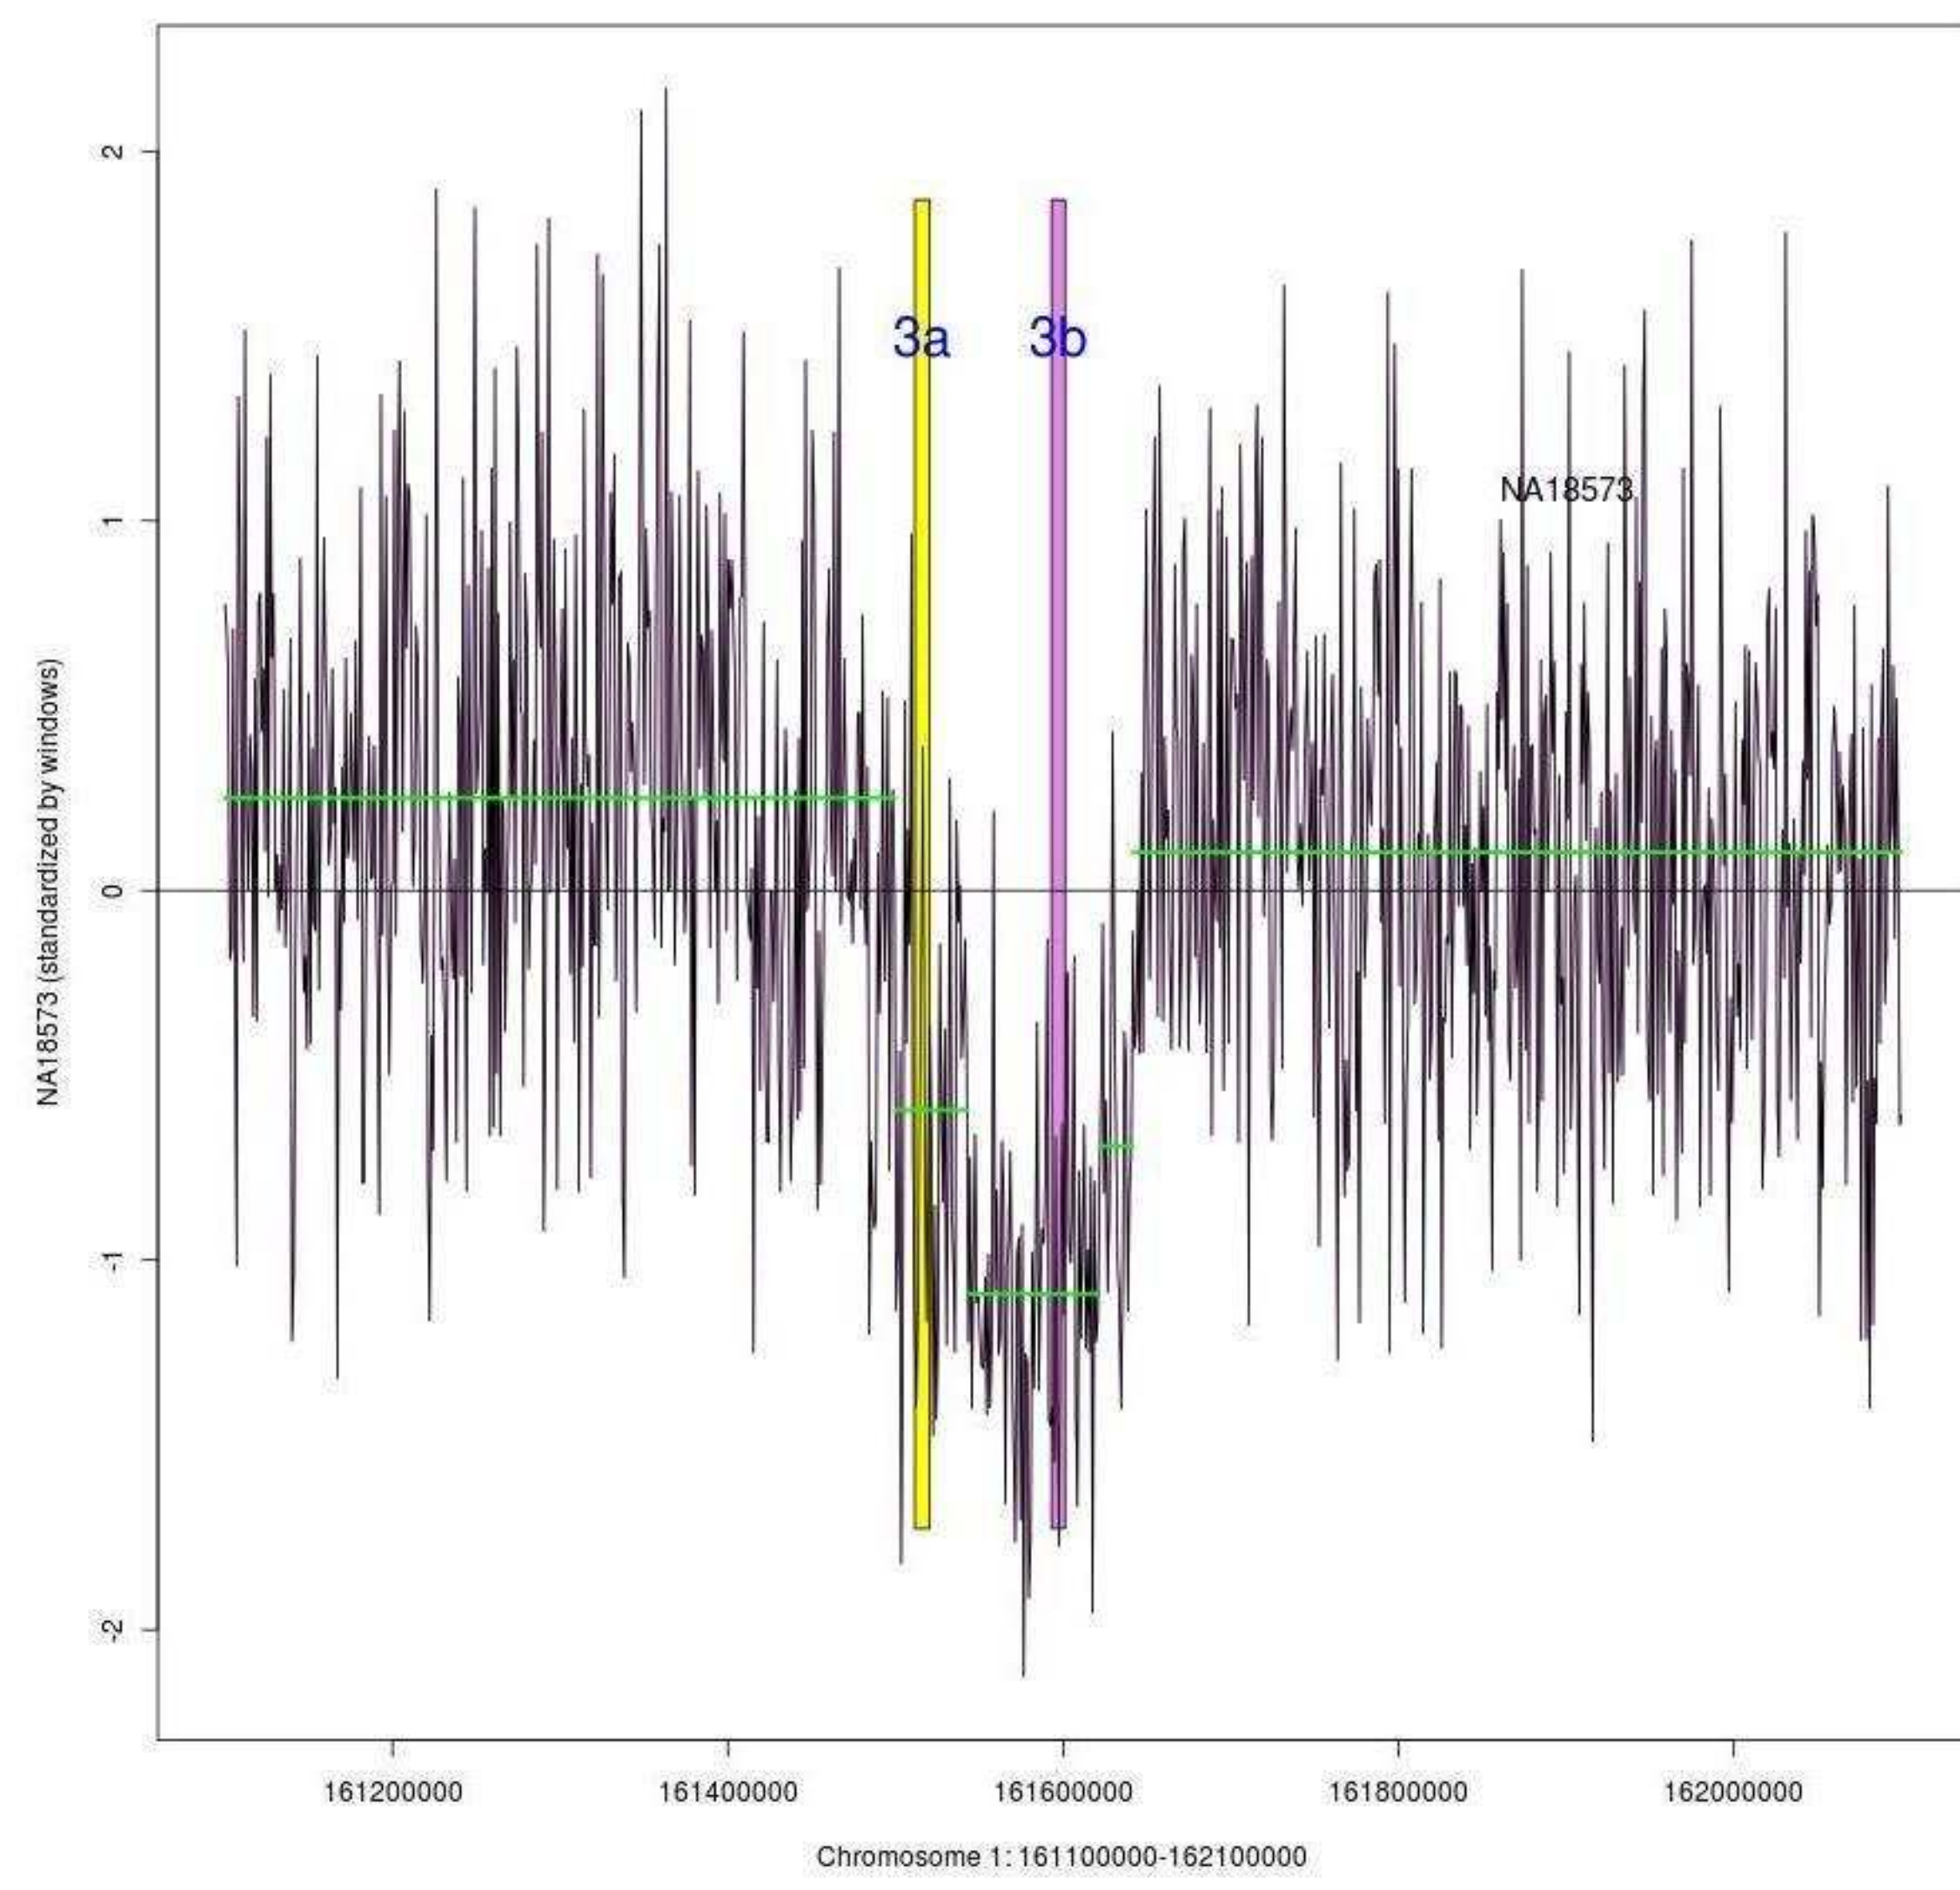

NA18577

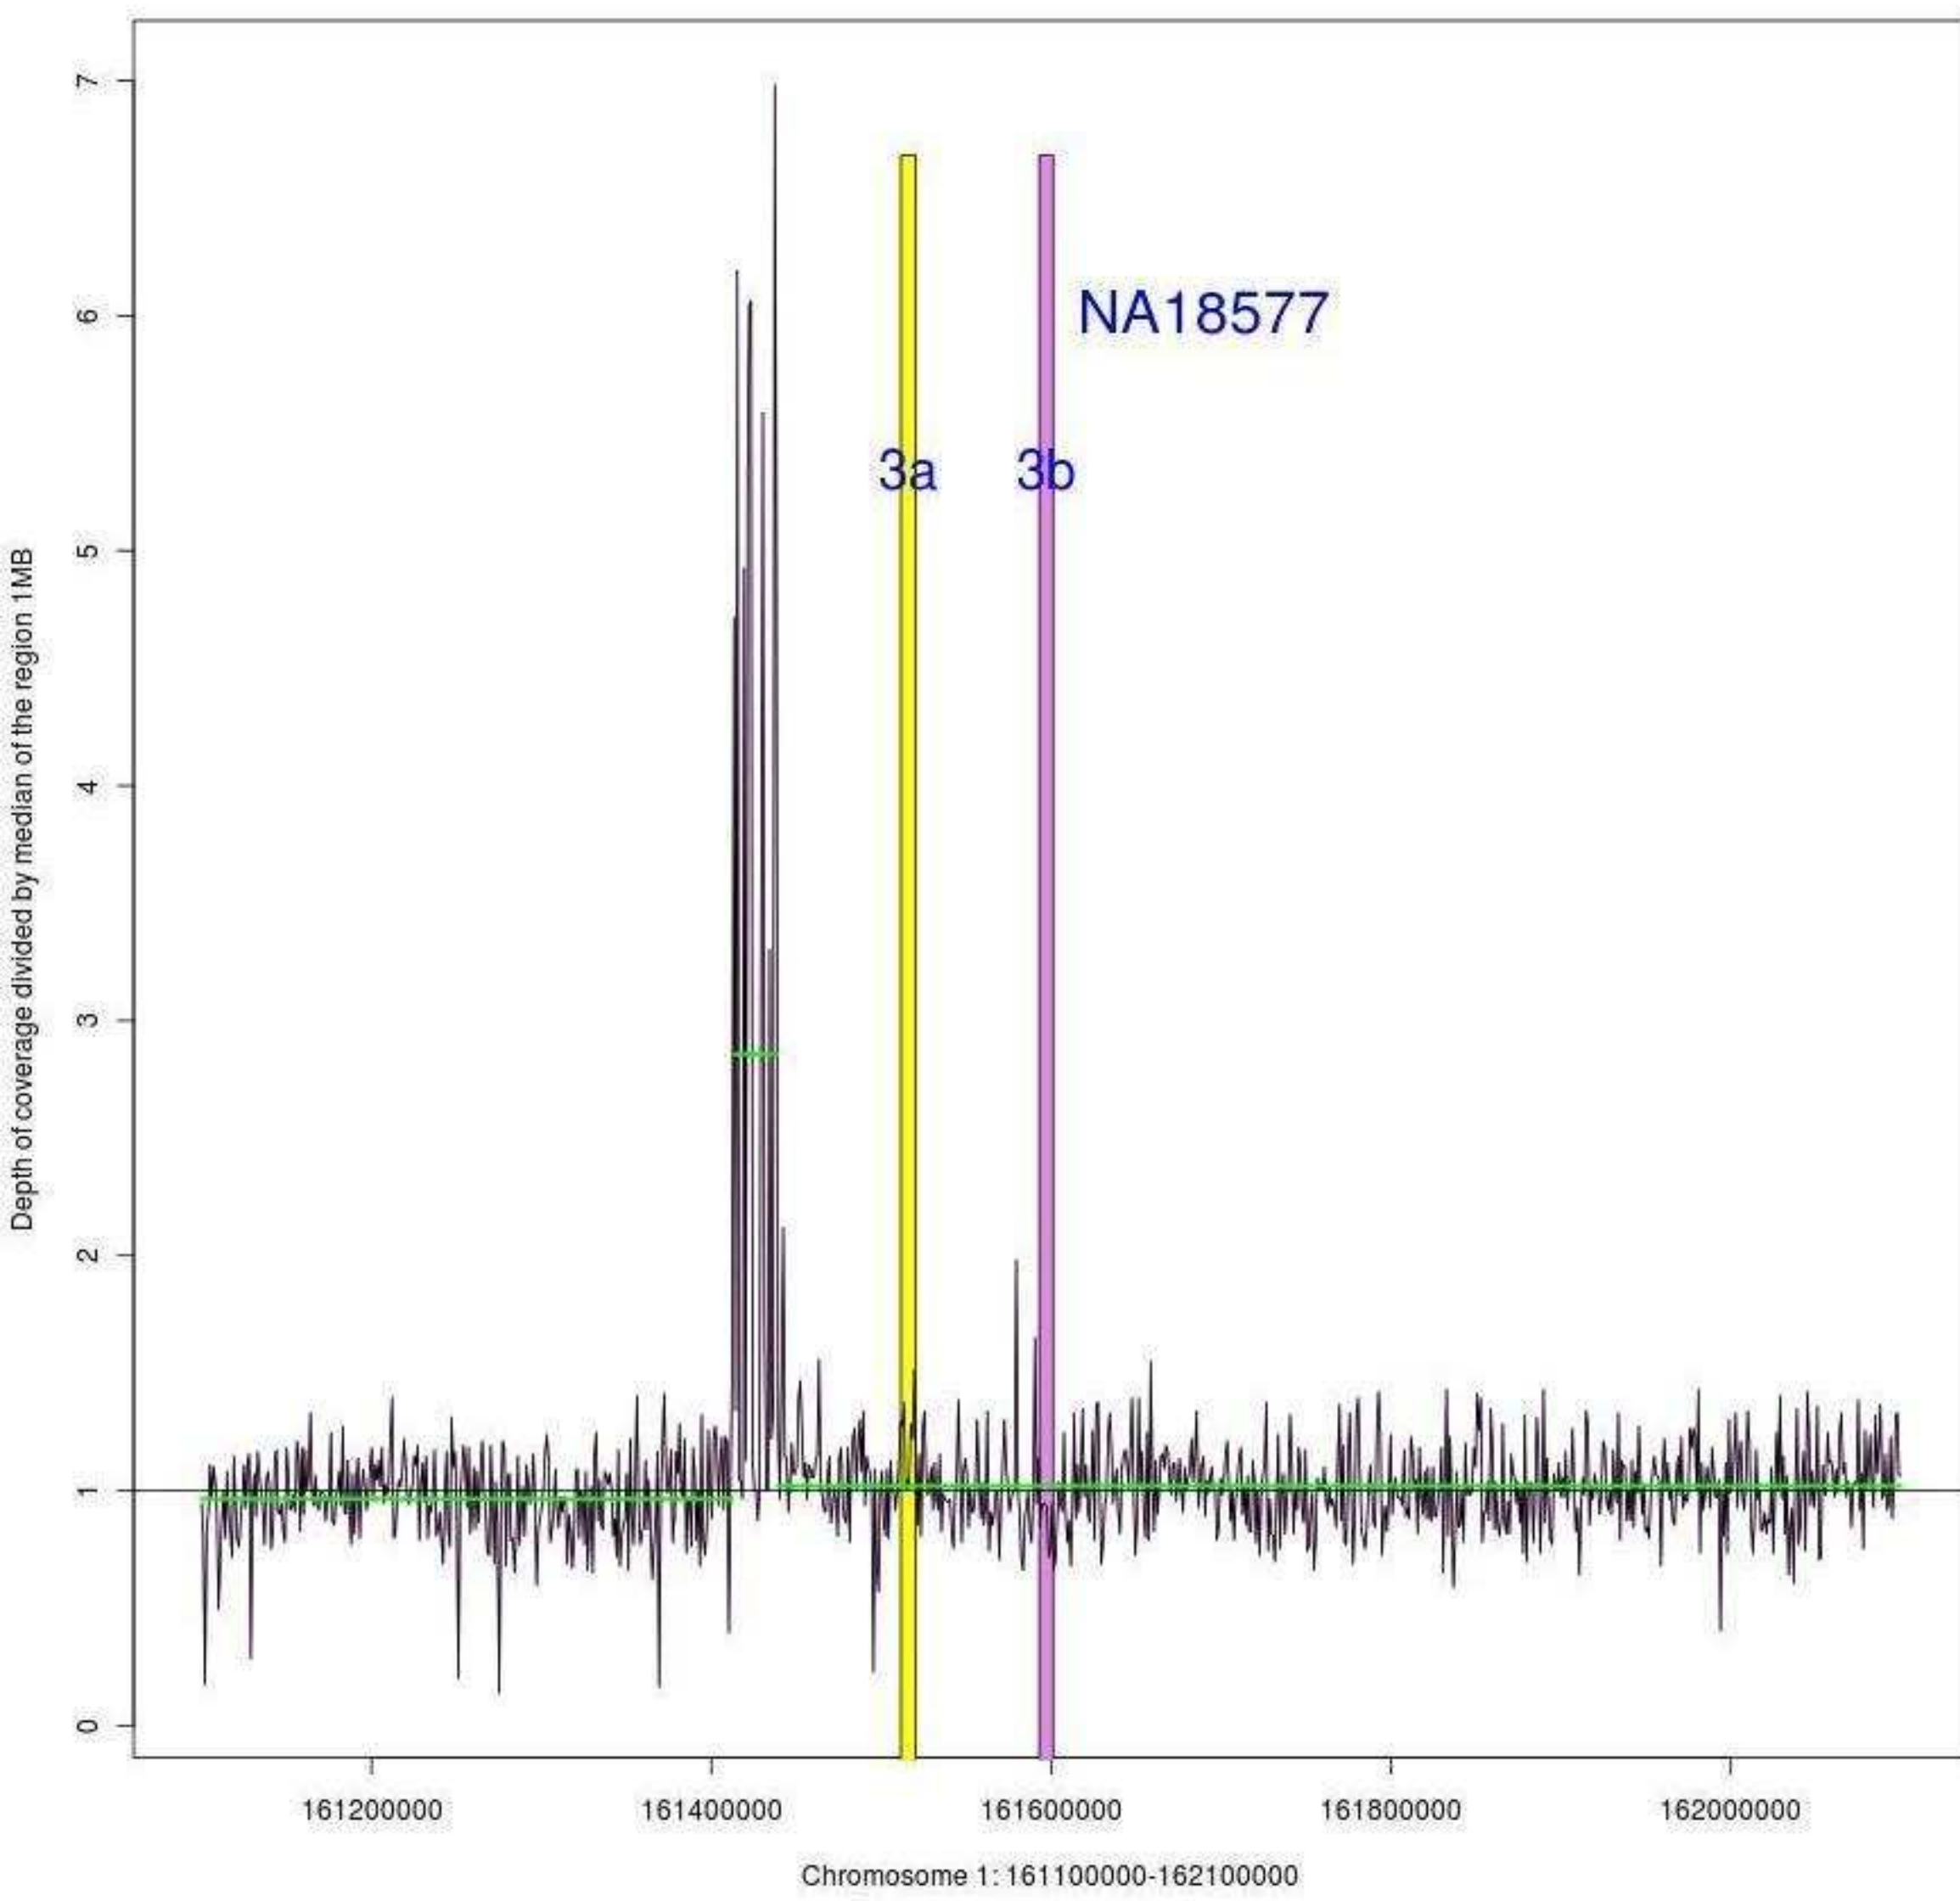

NA18577

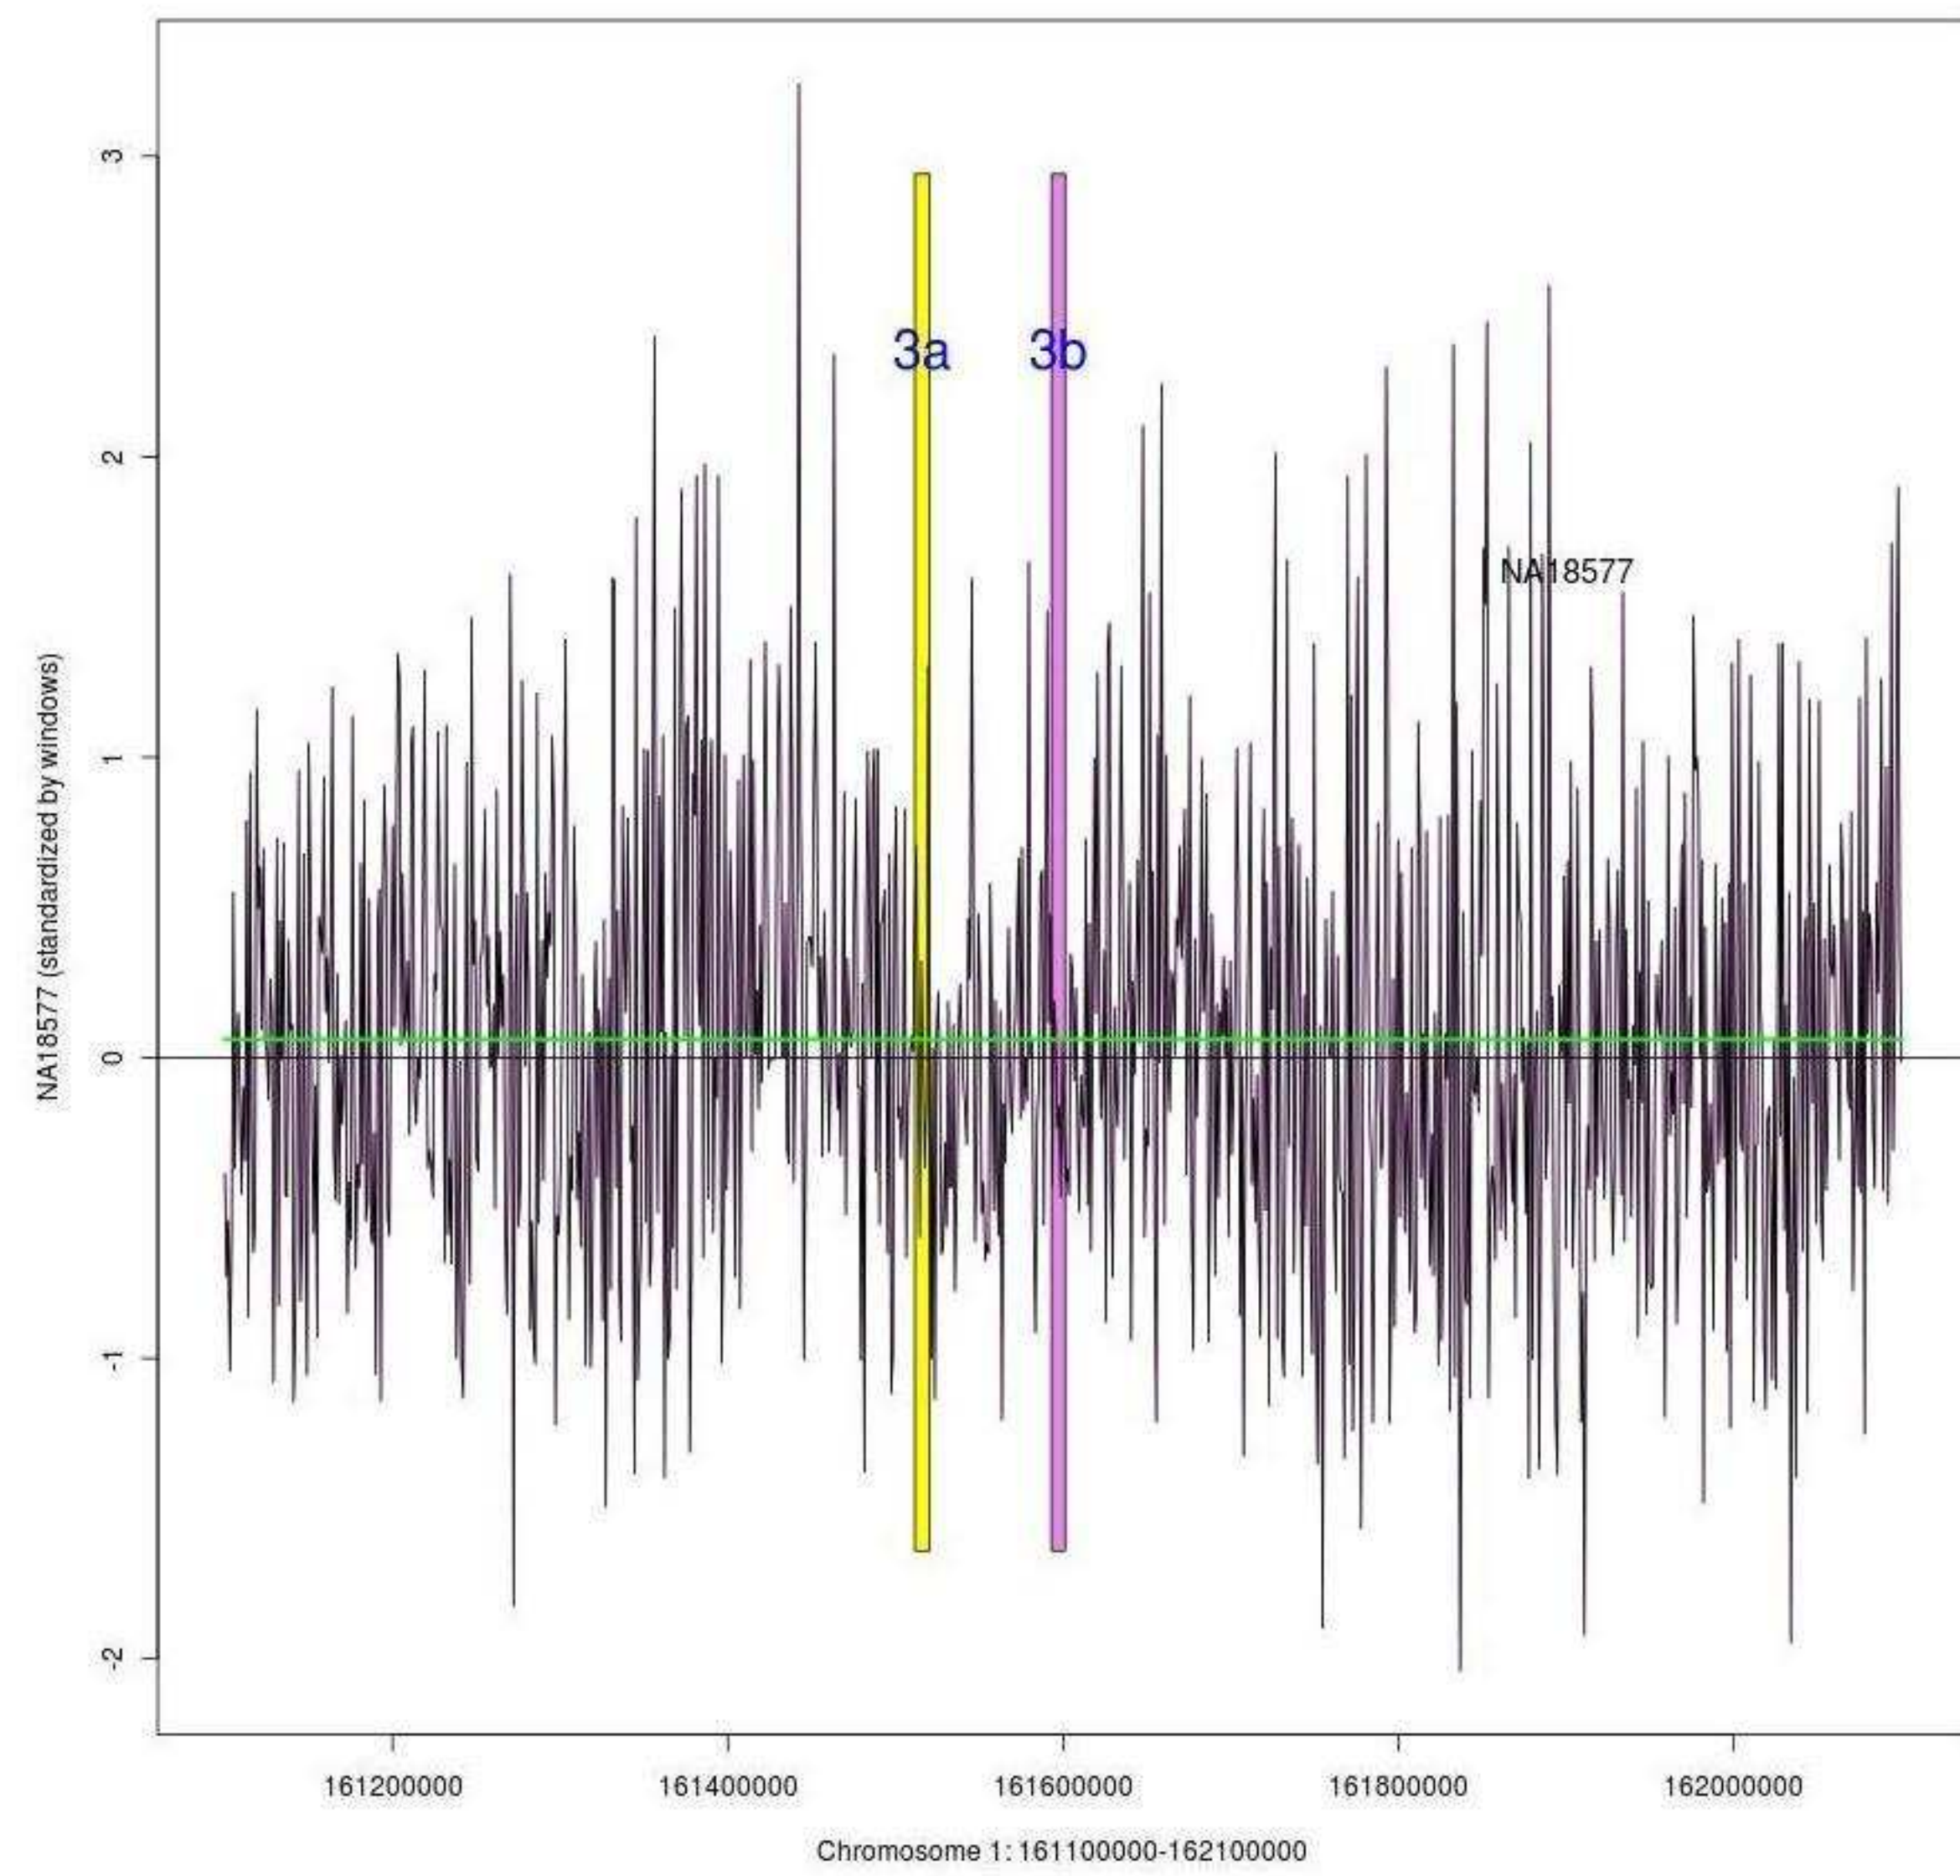

NA18579

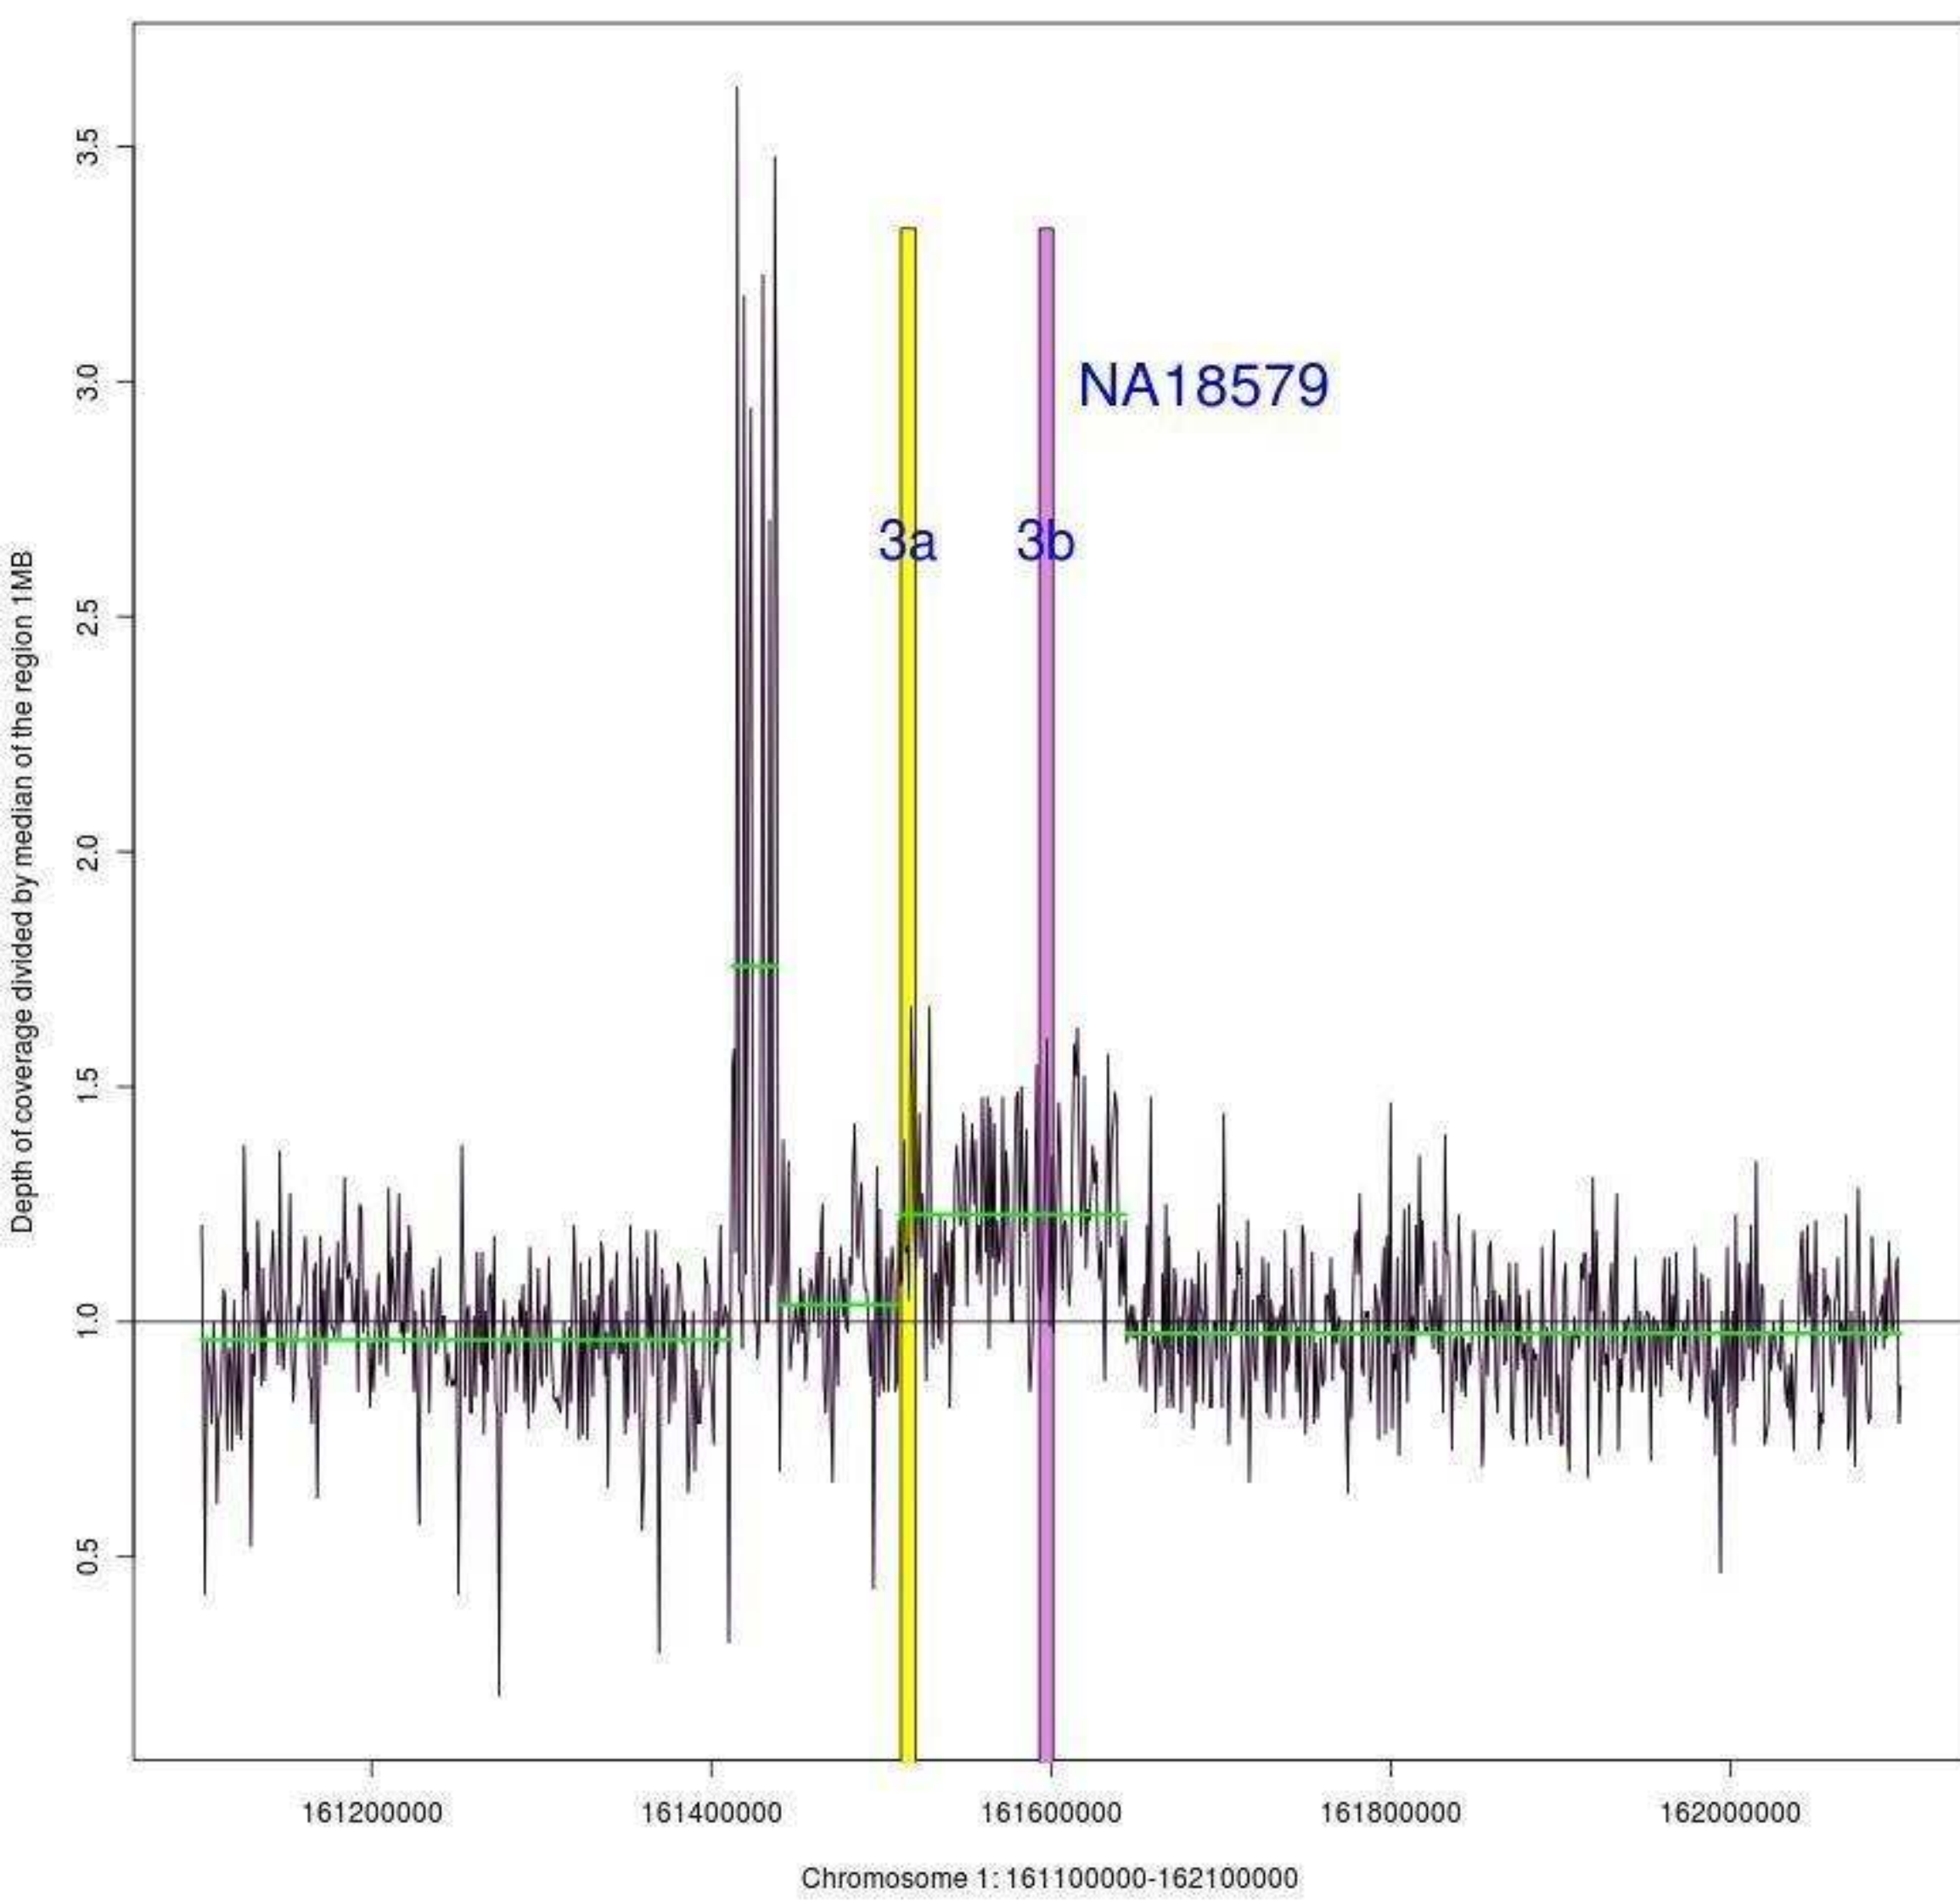

NA18579

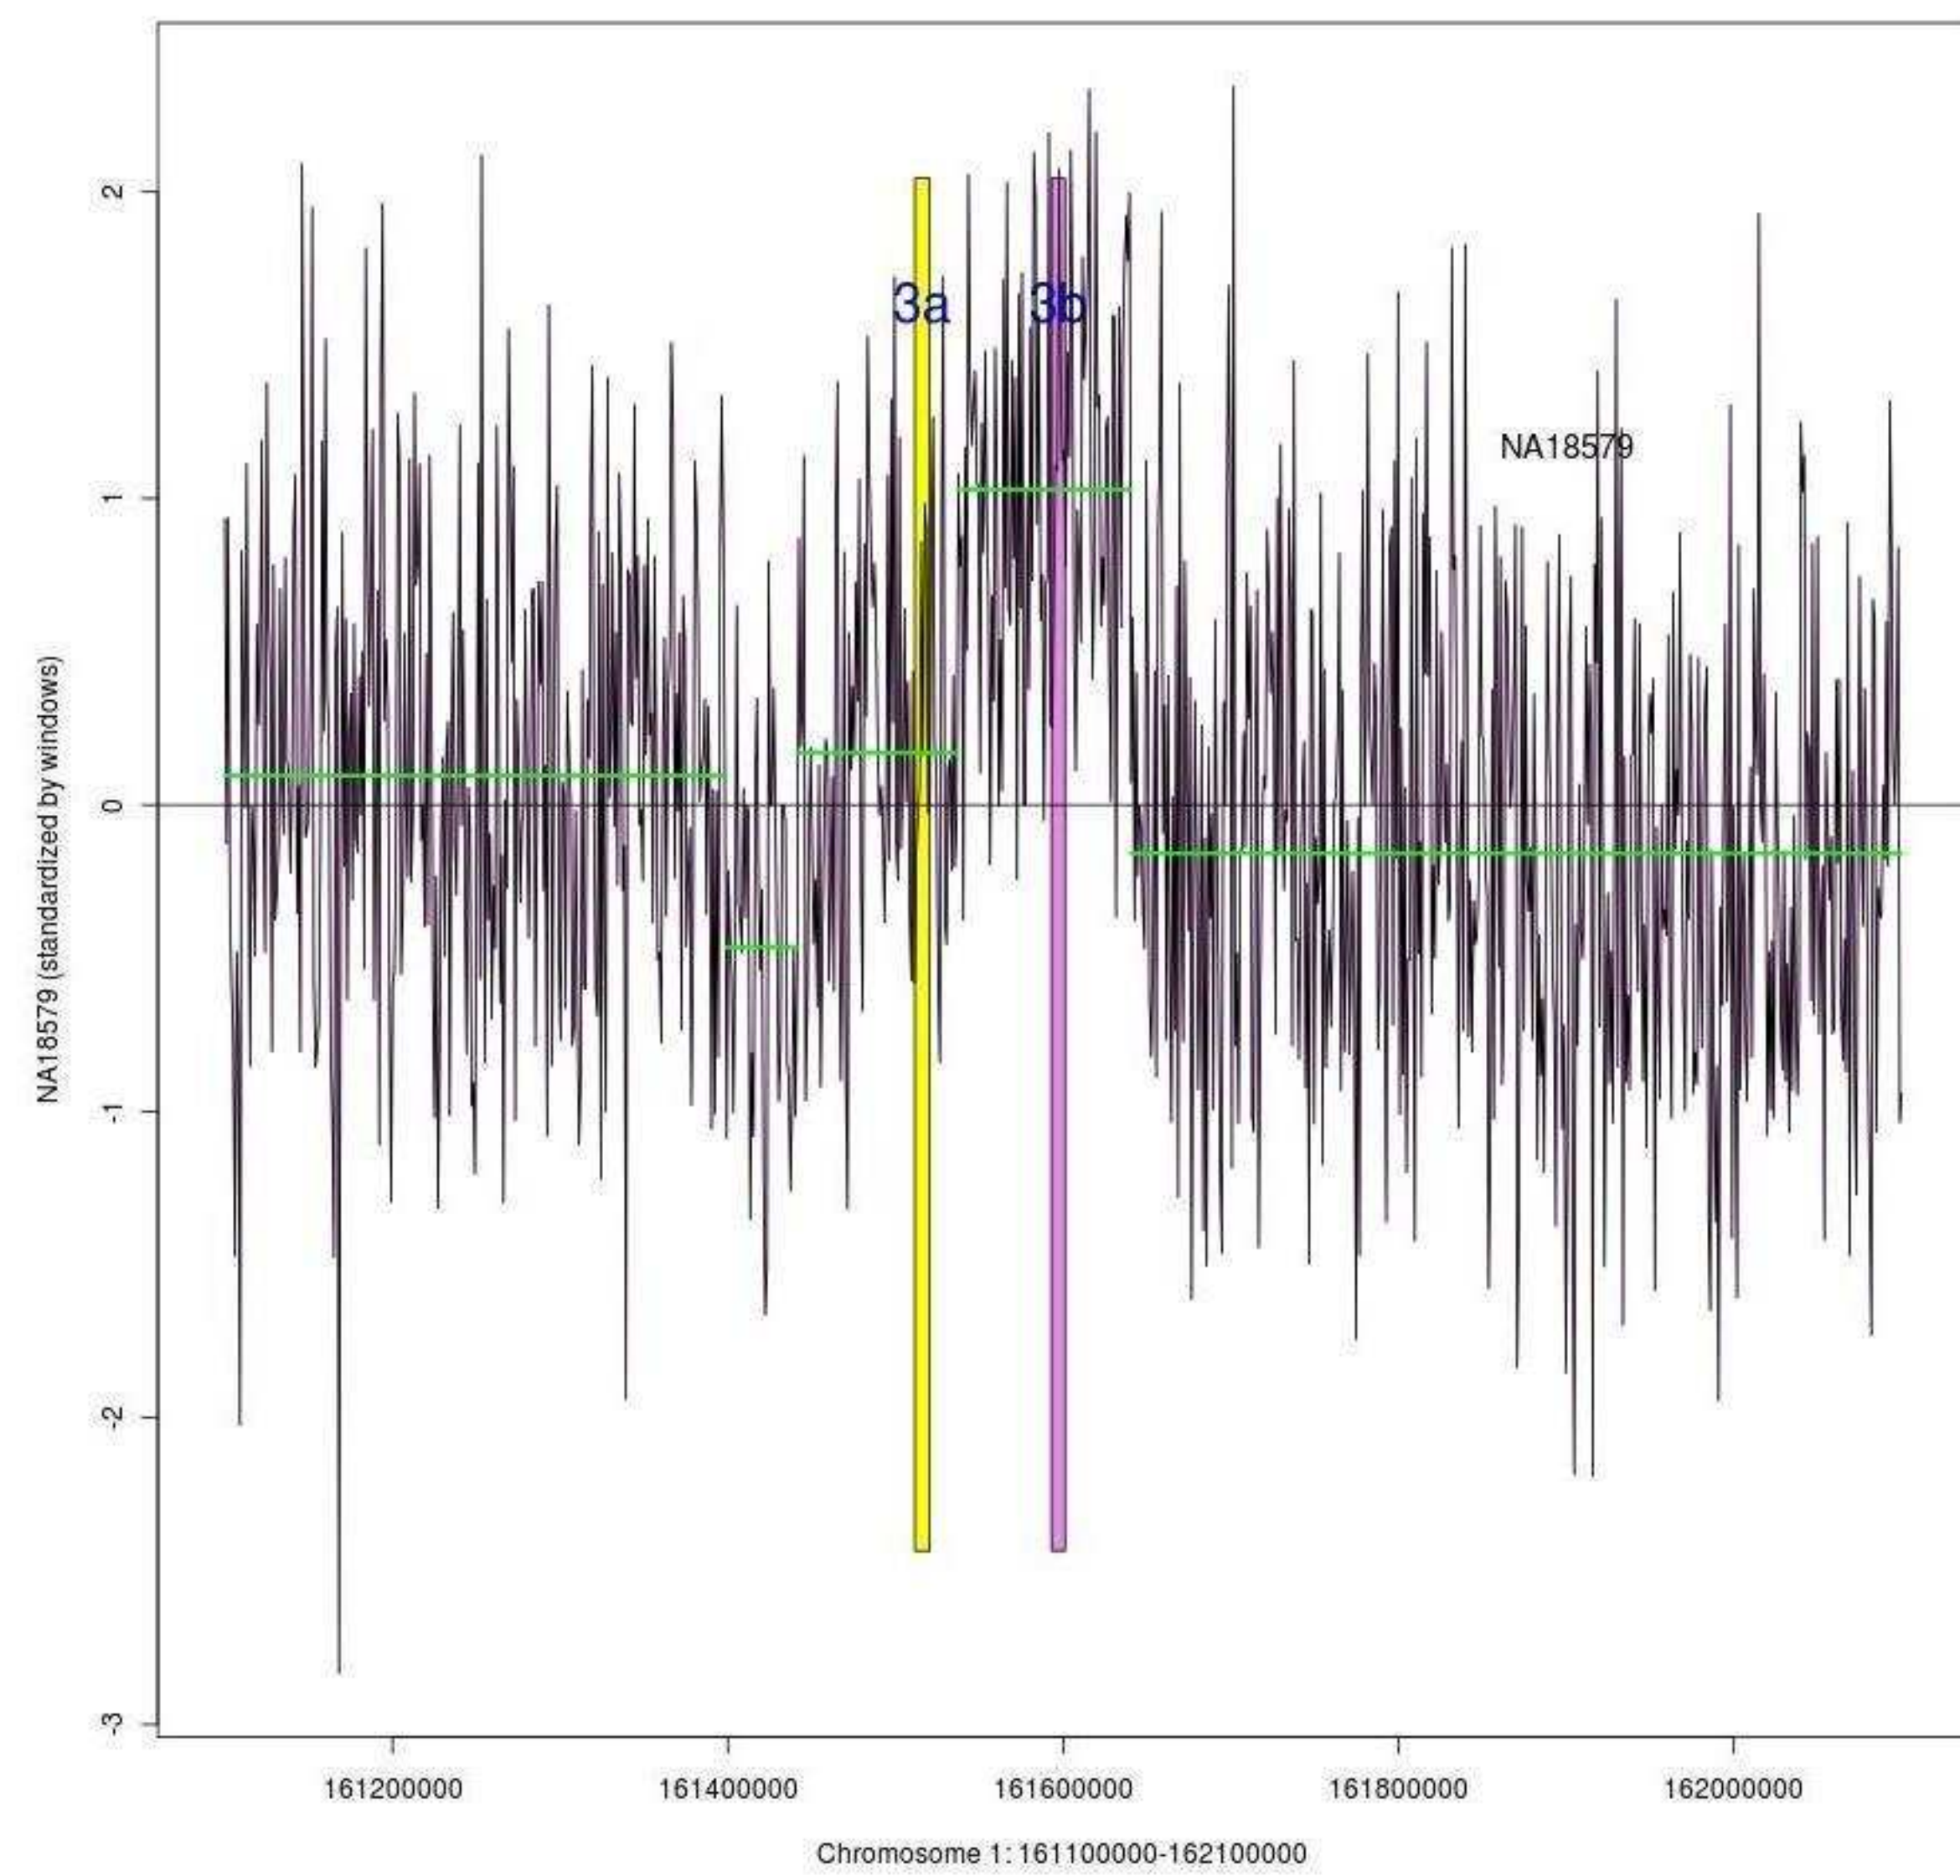



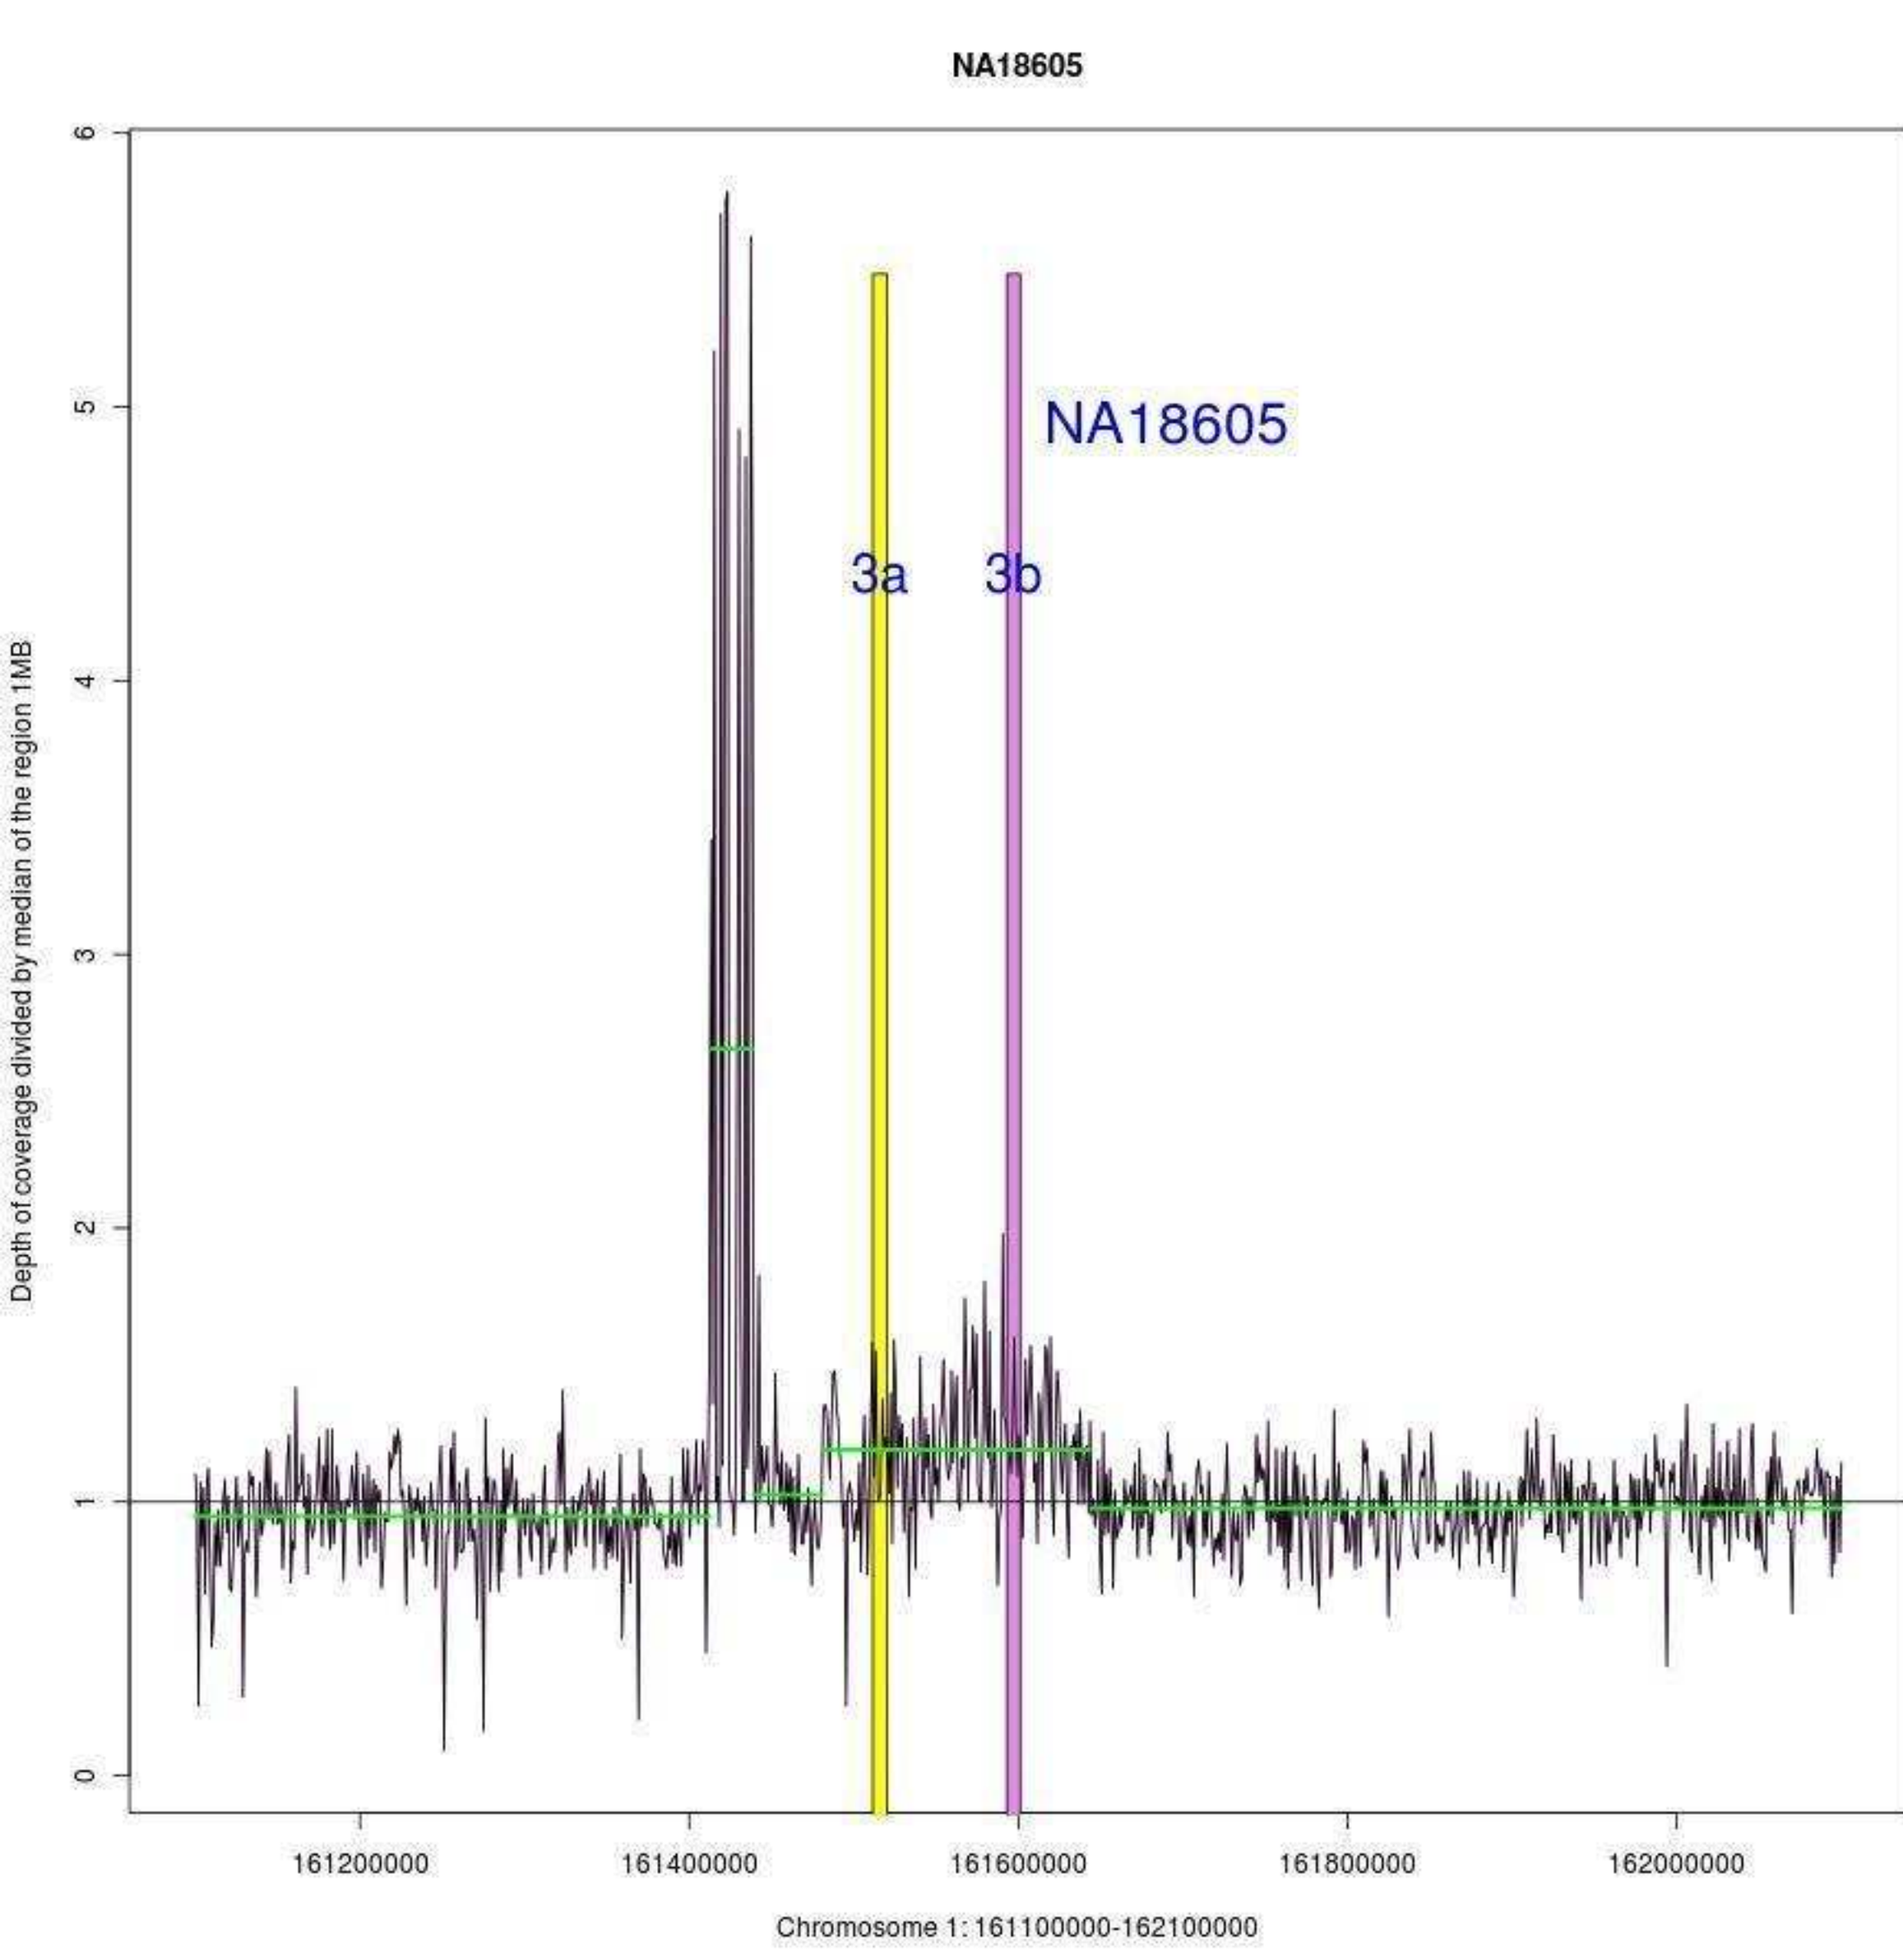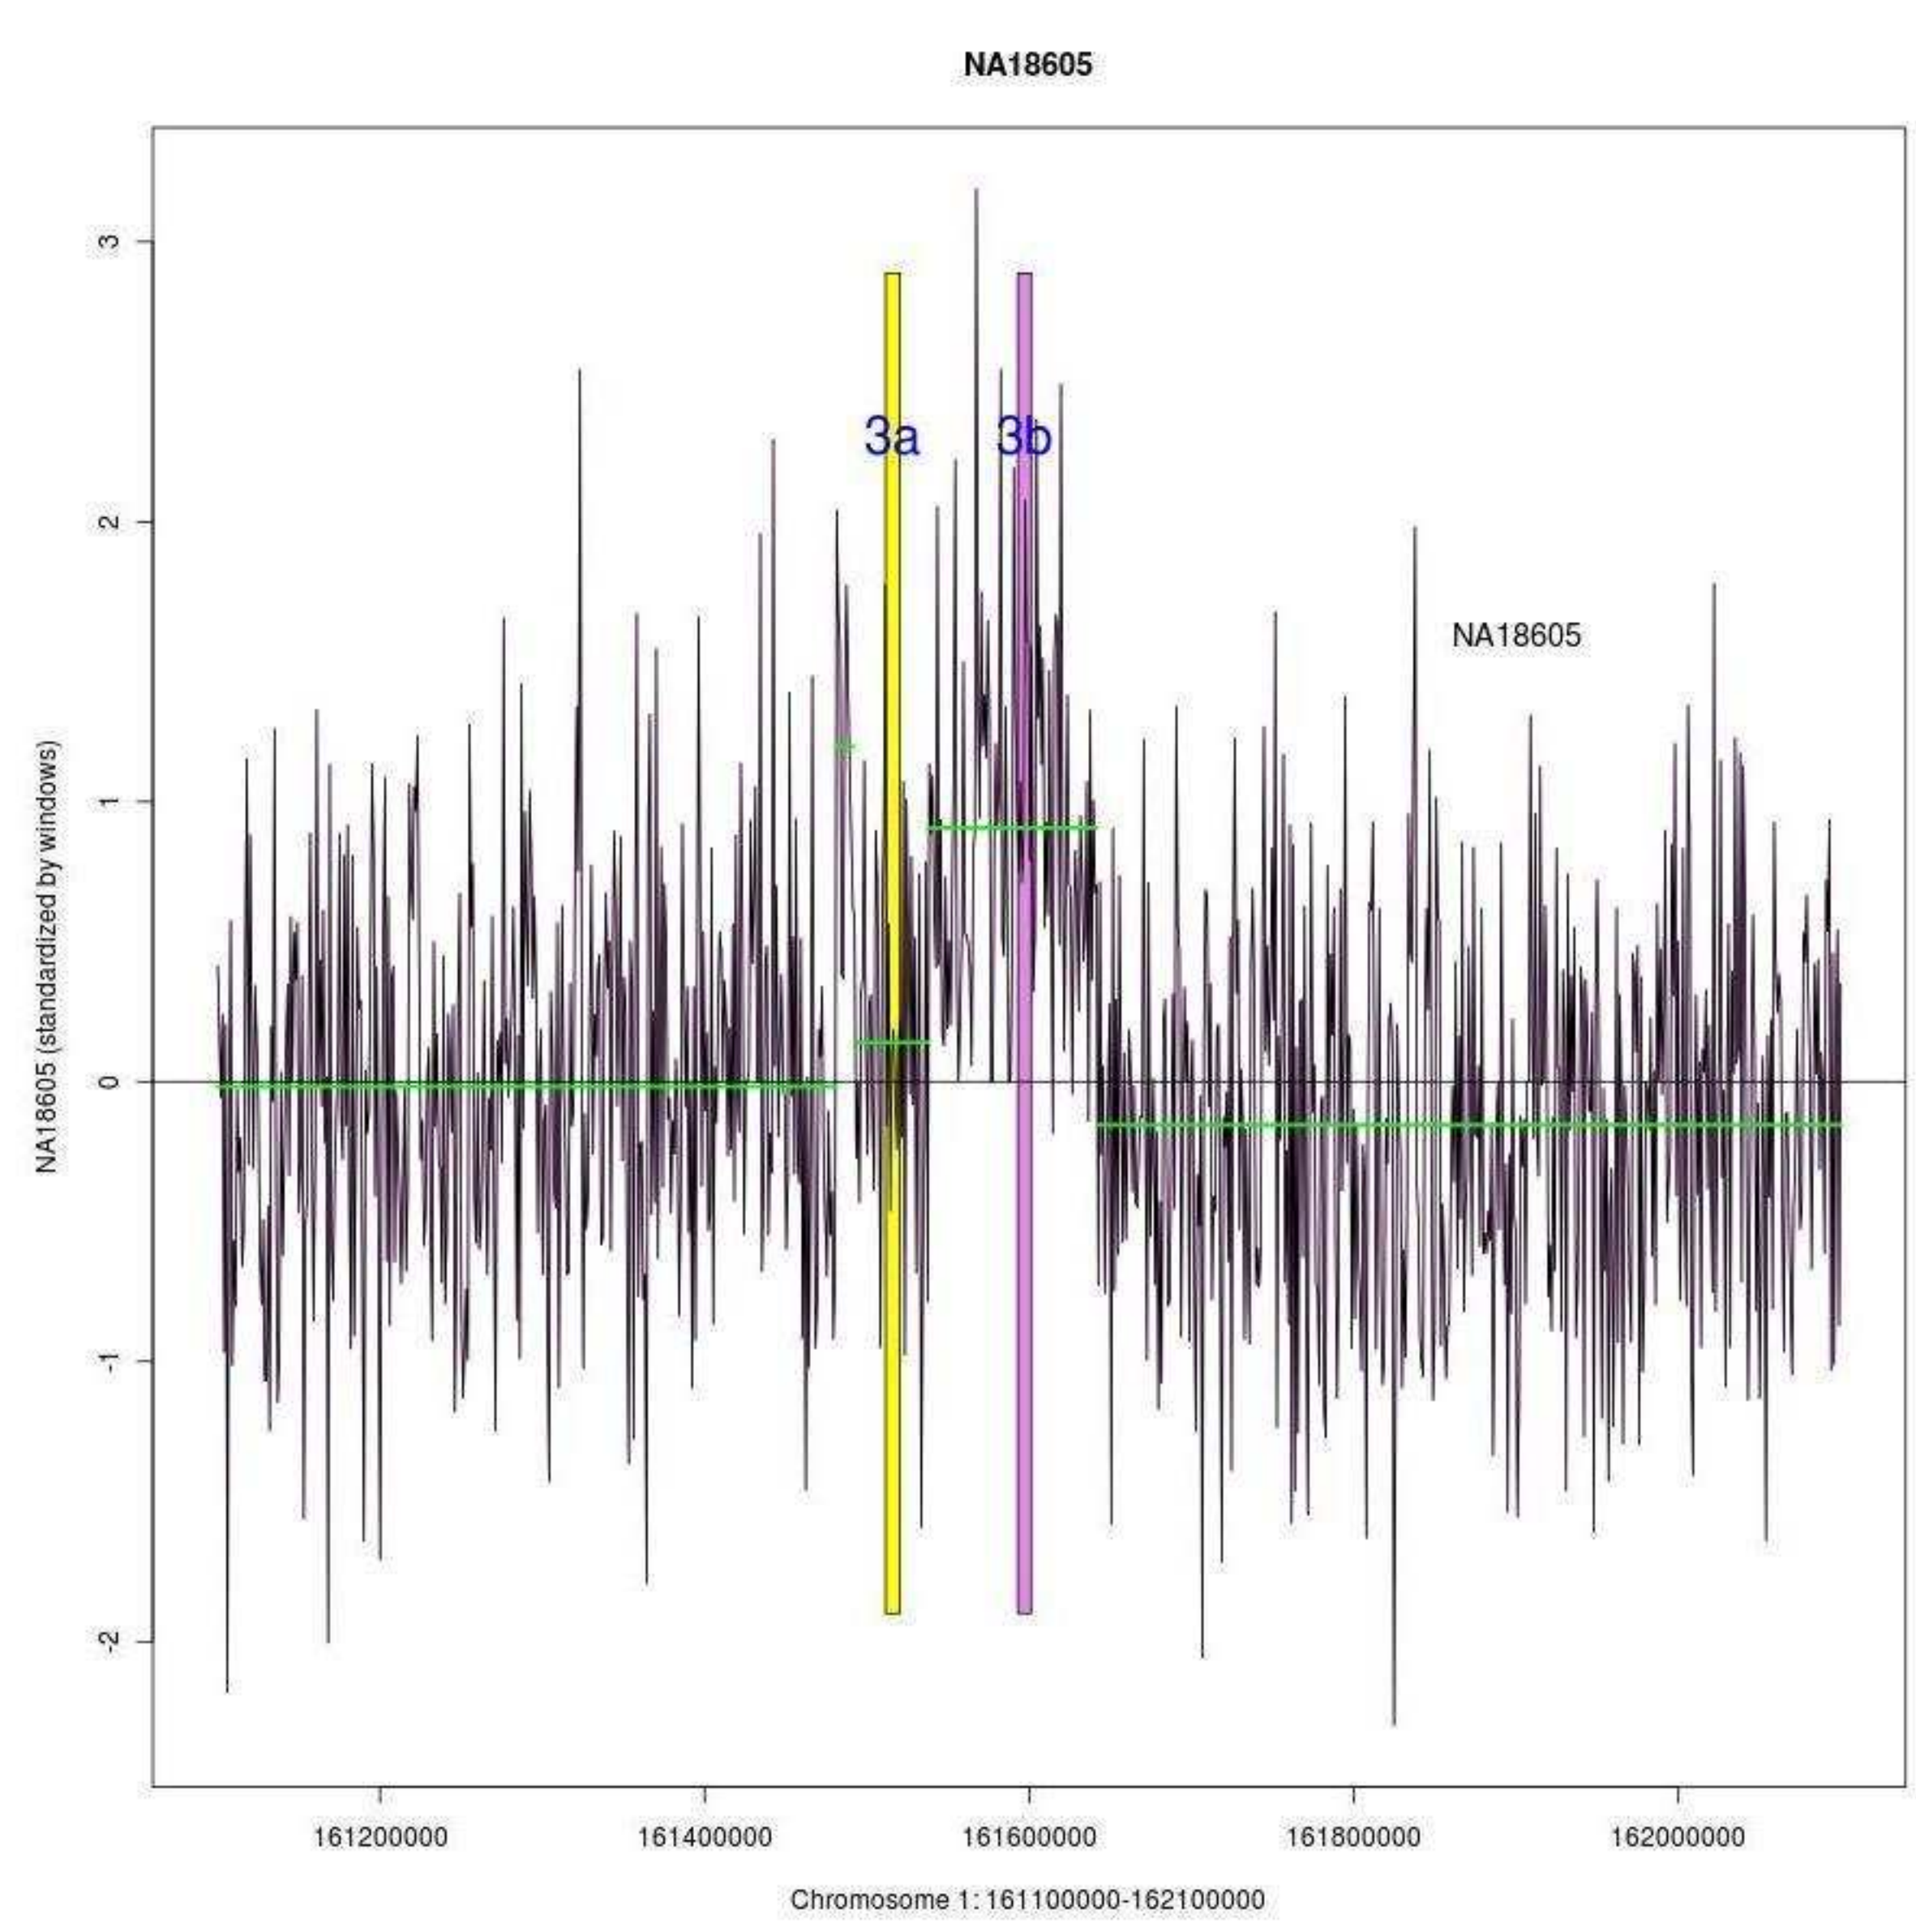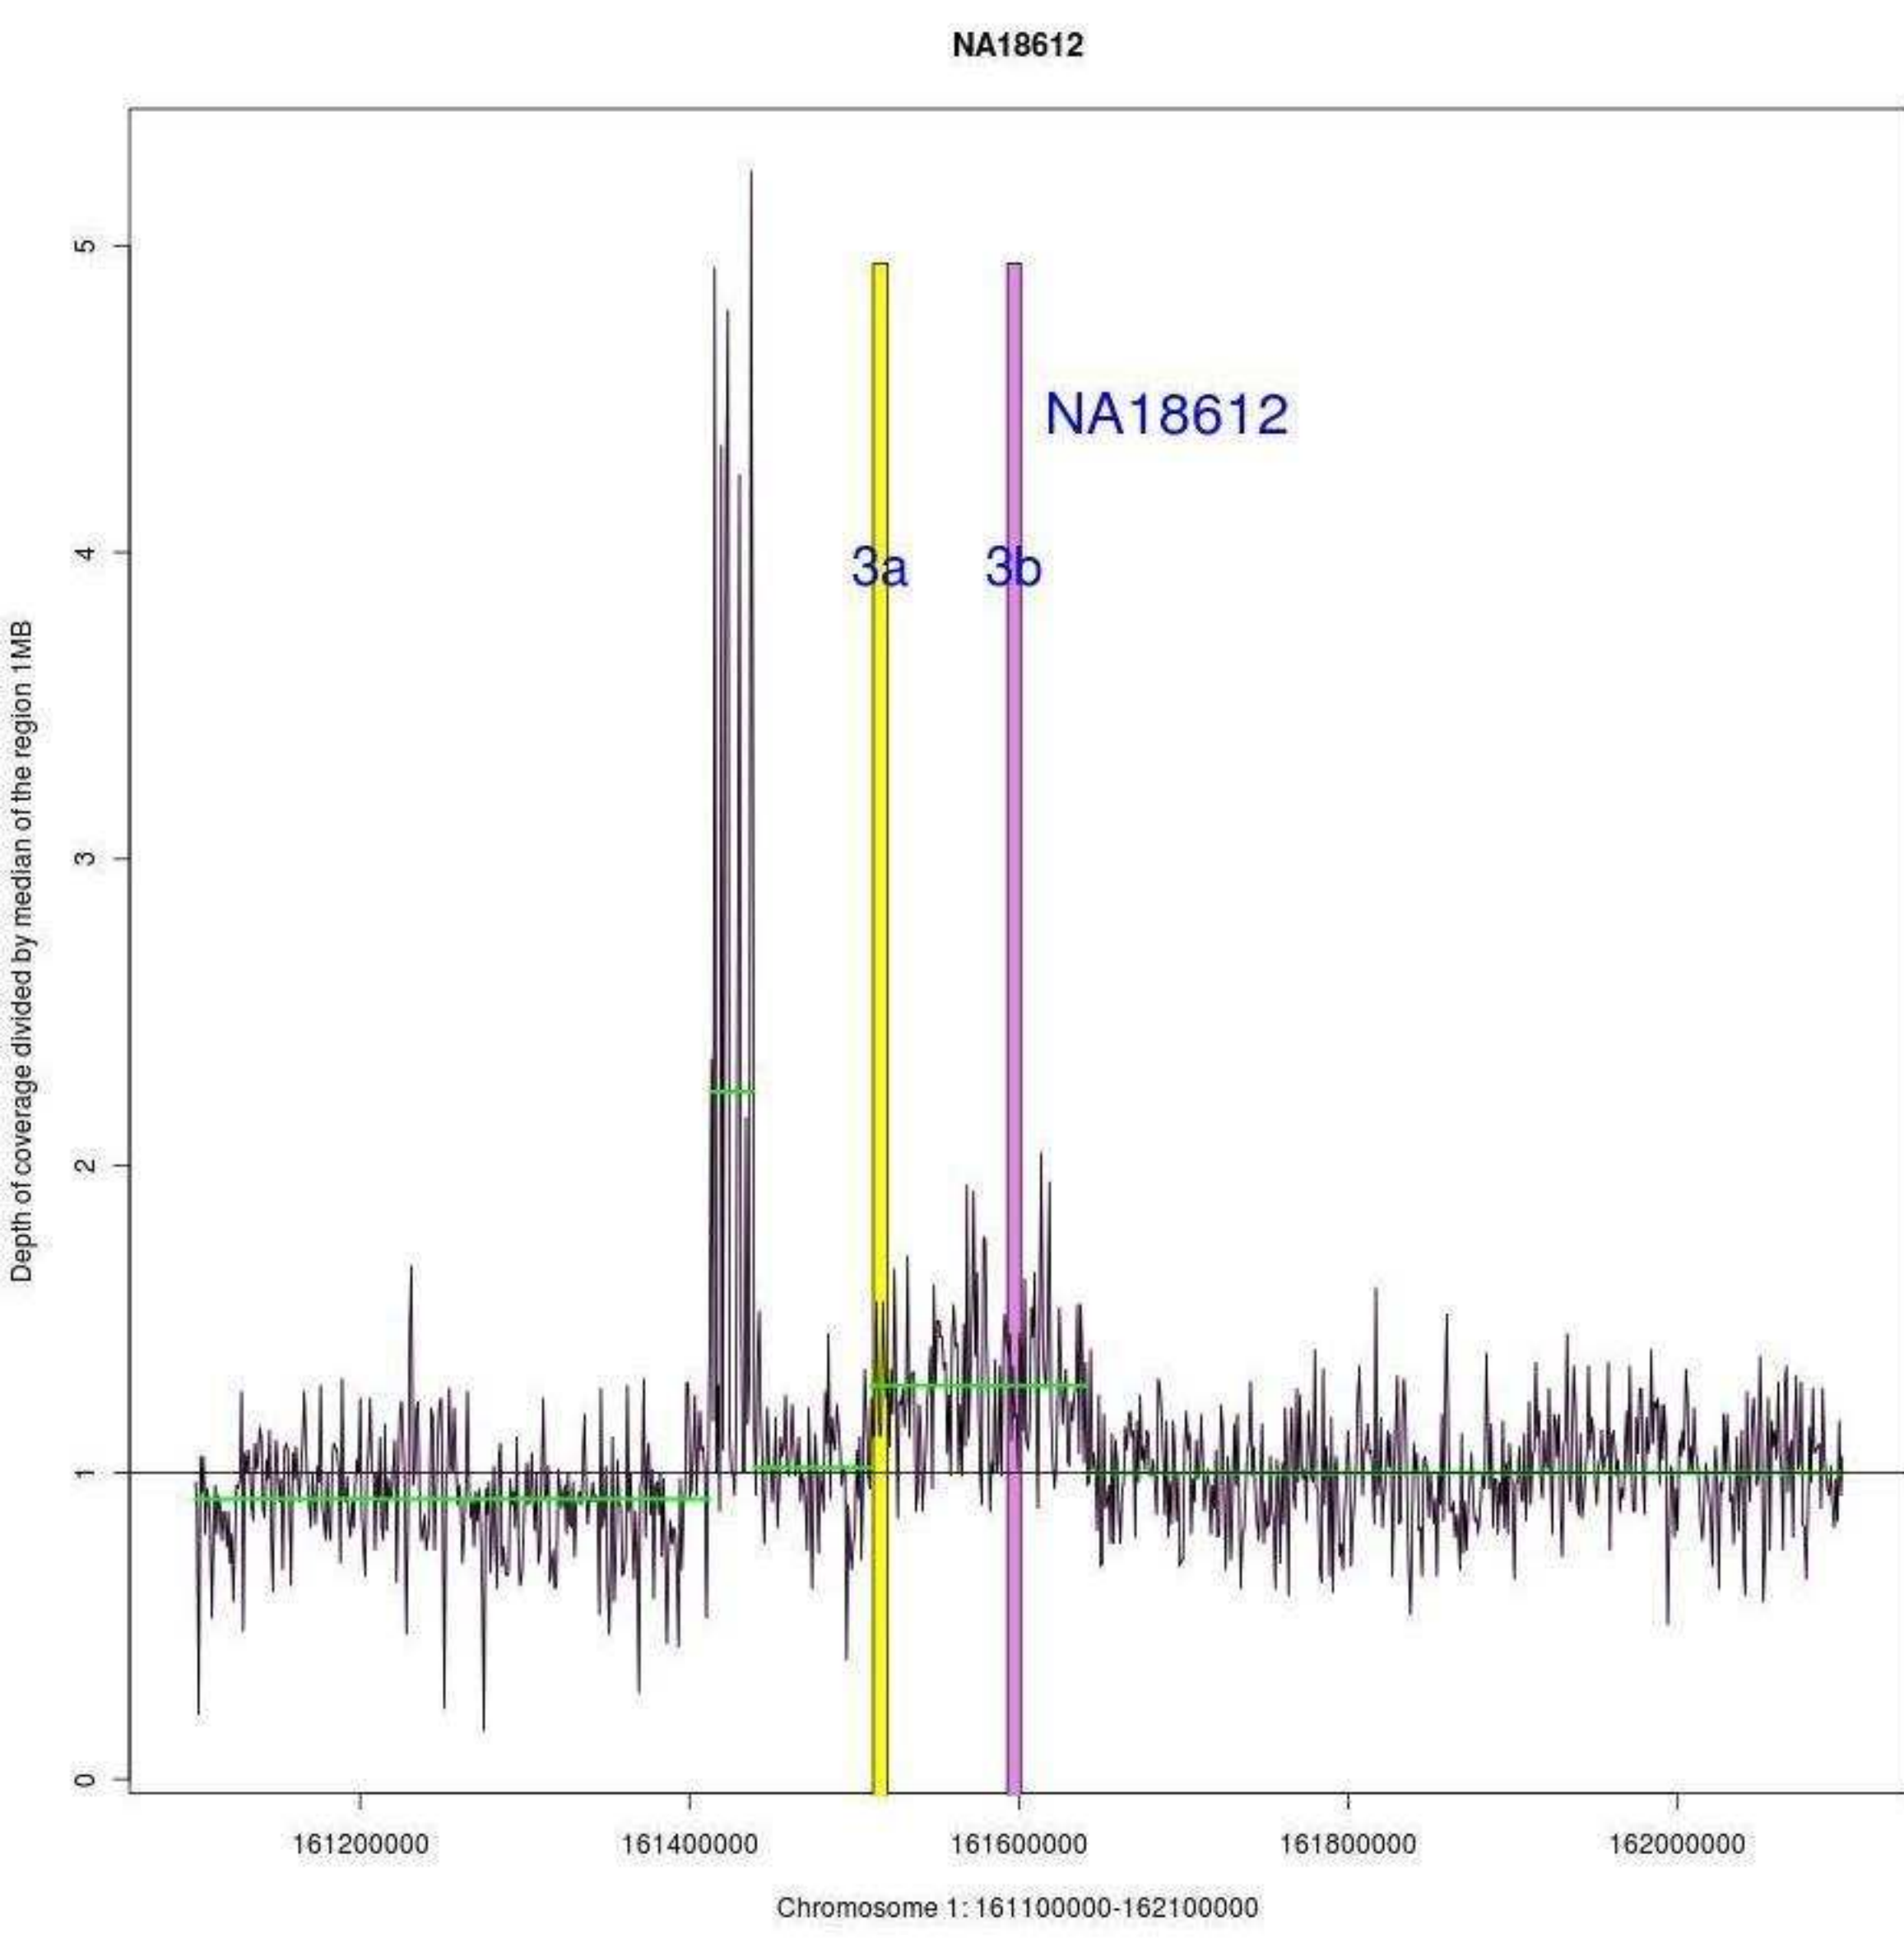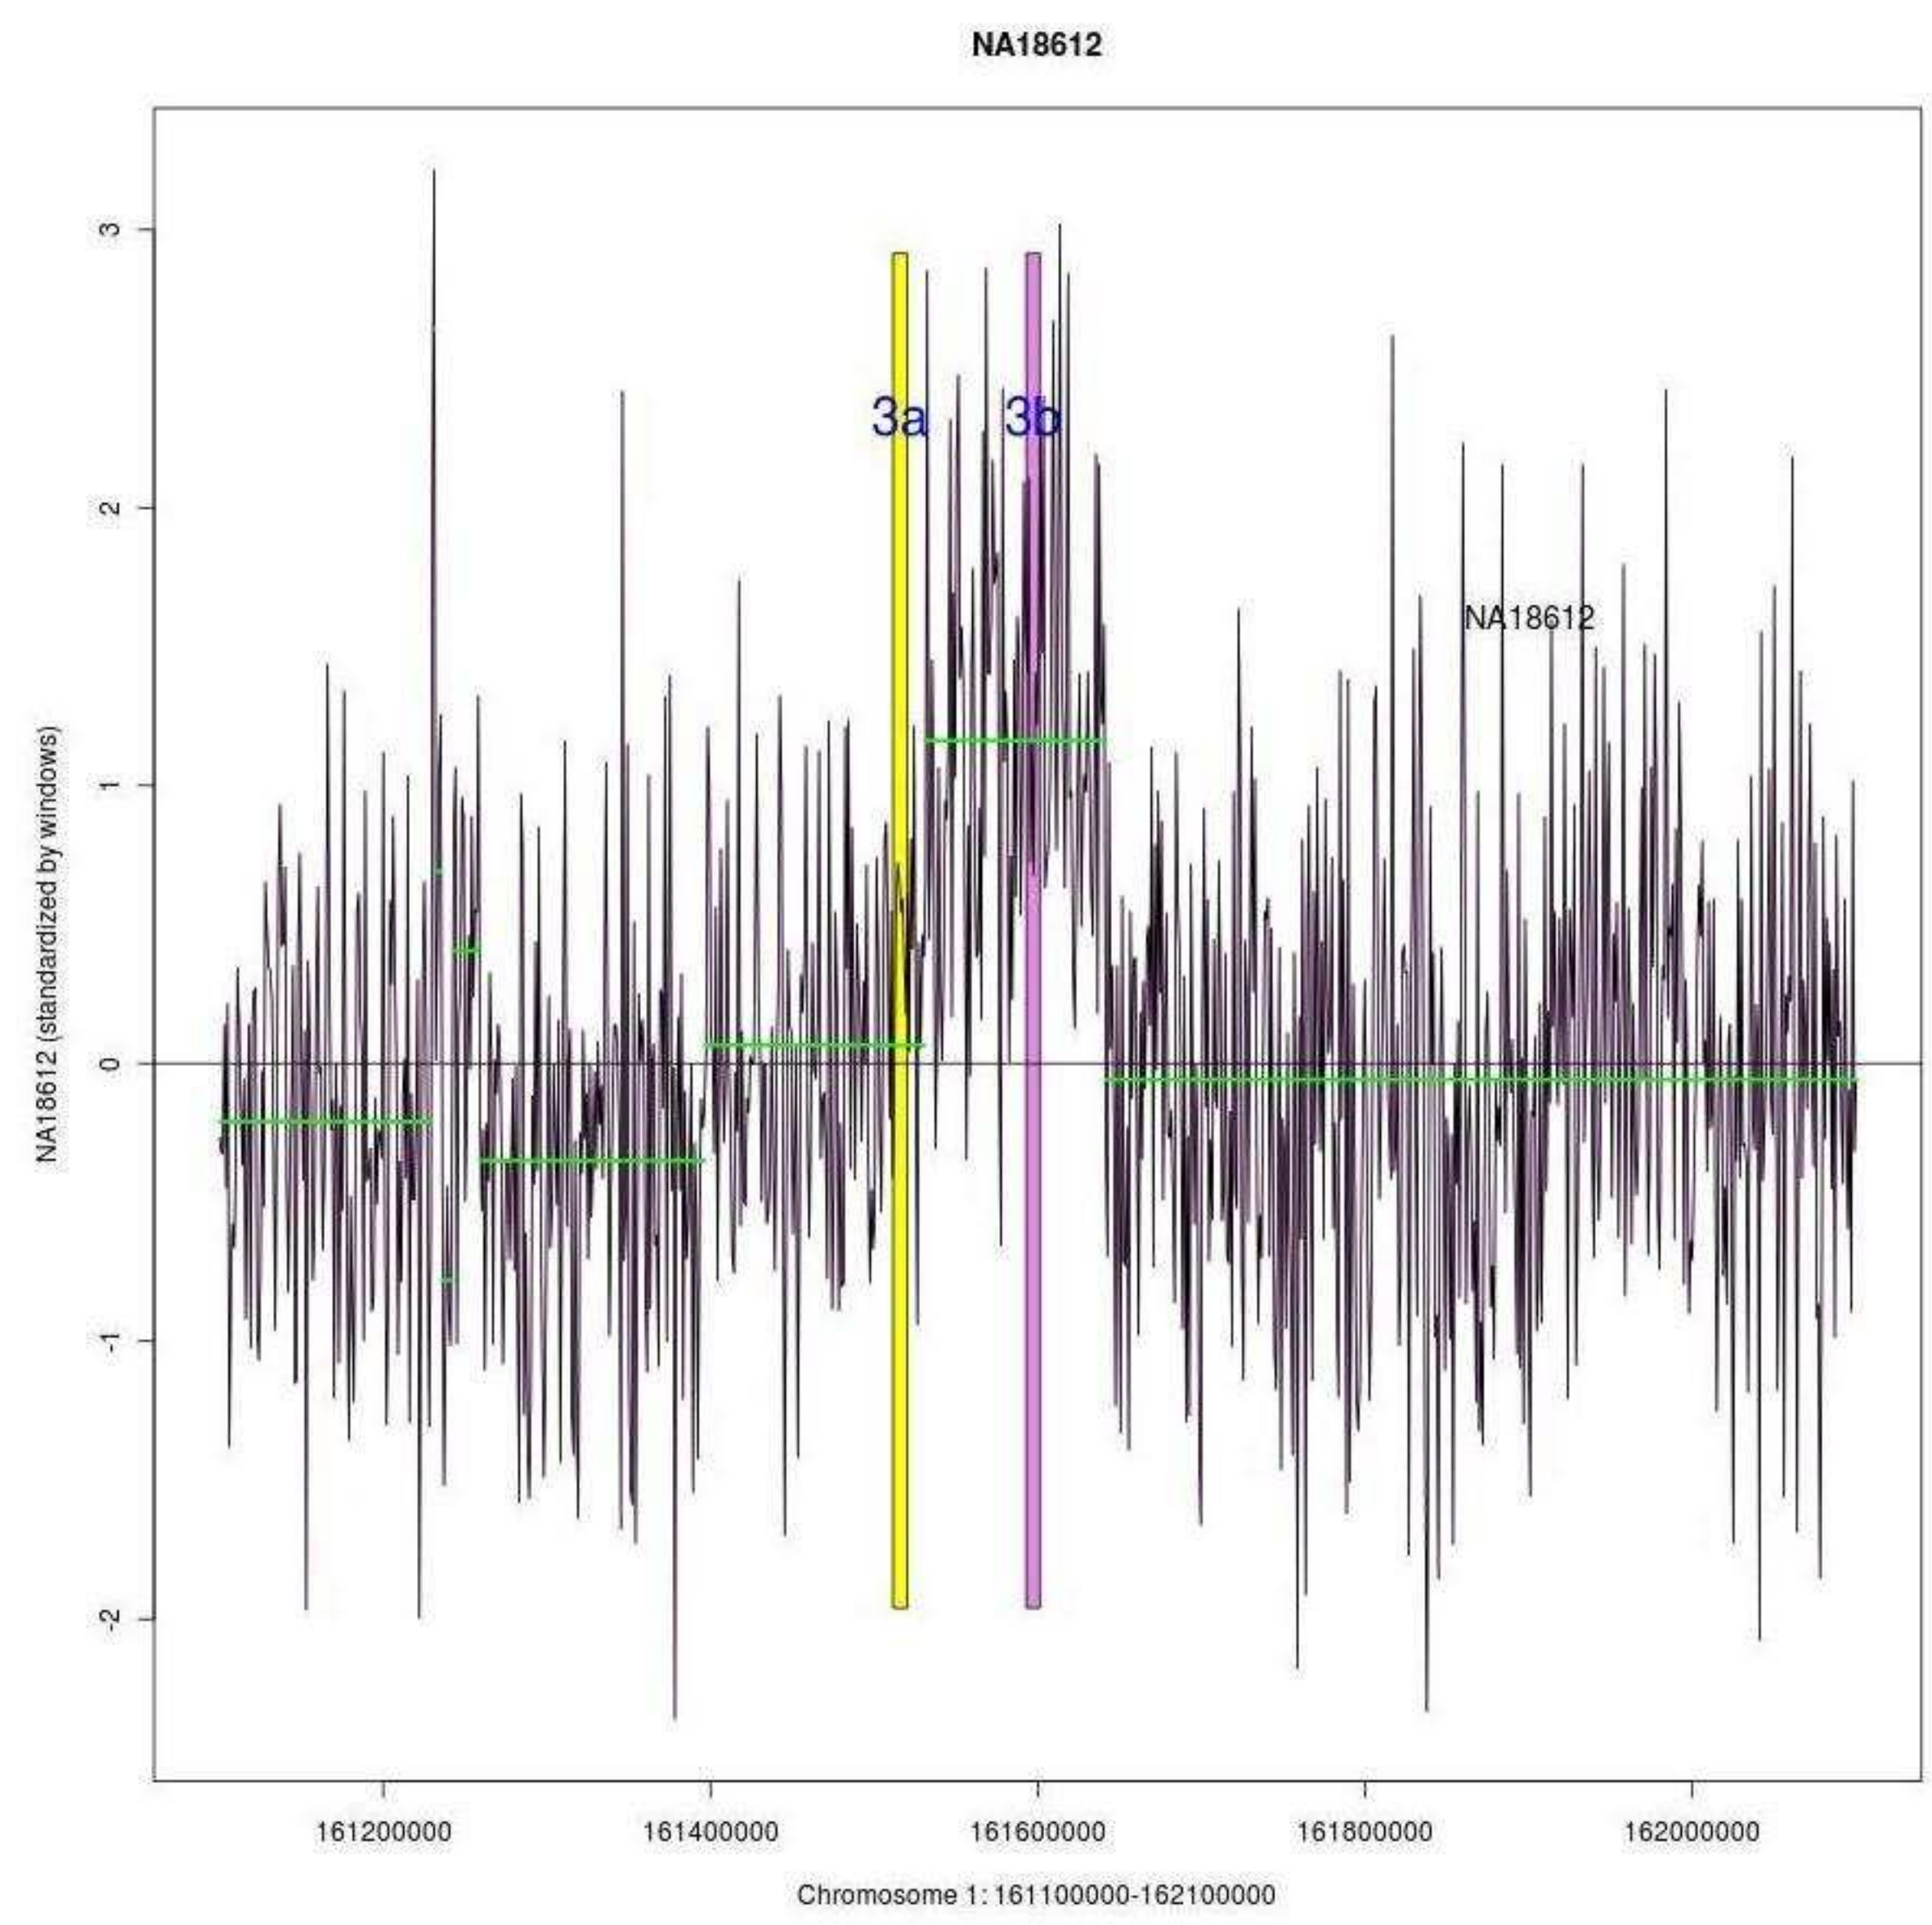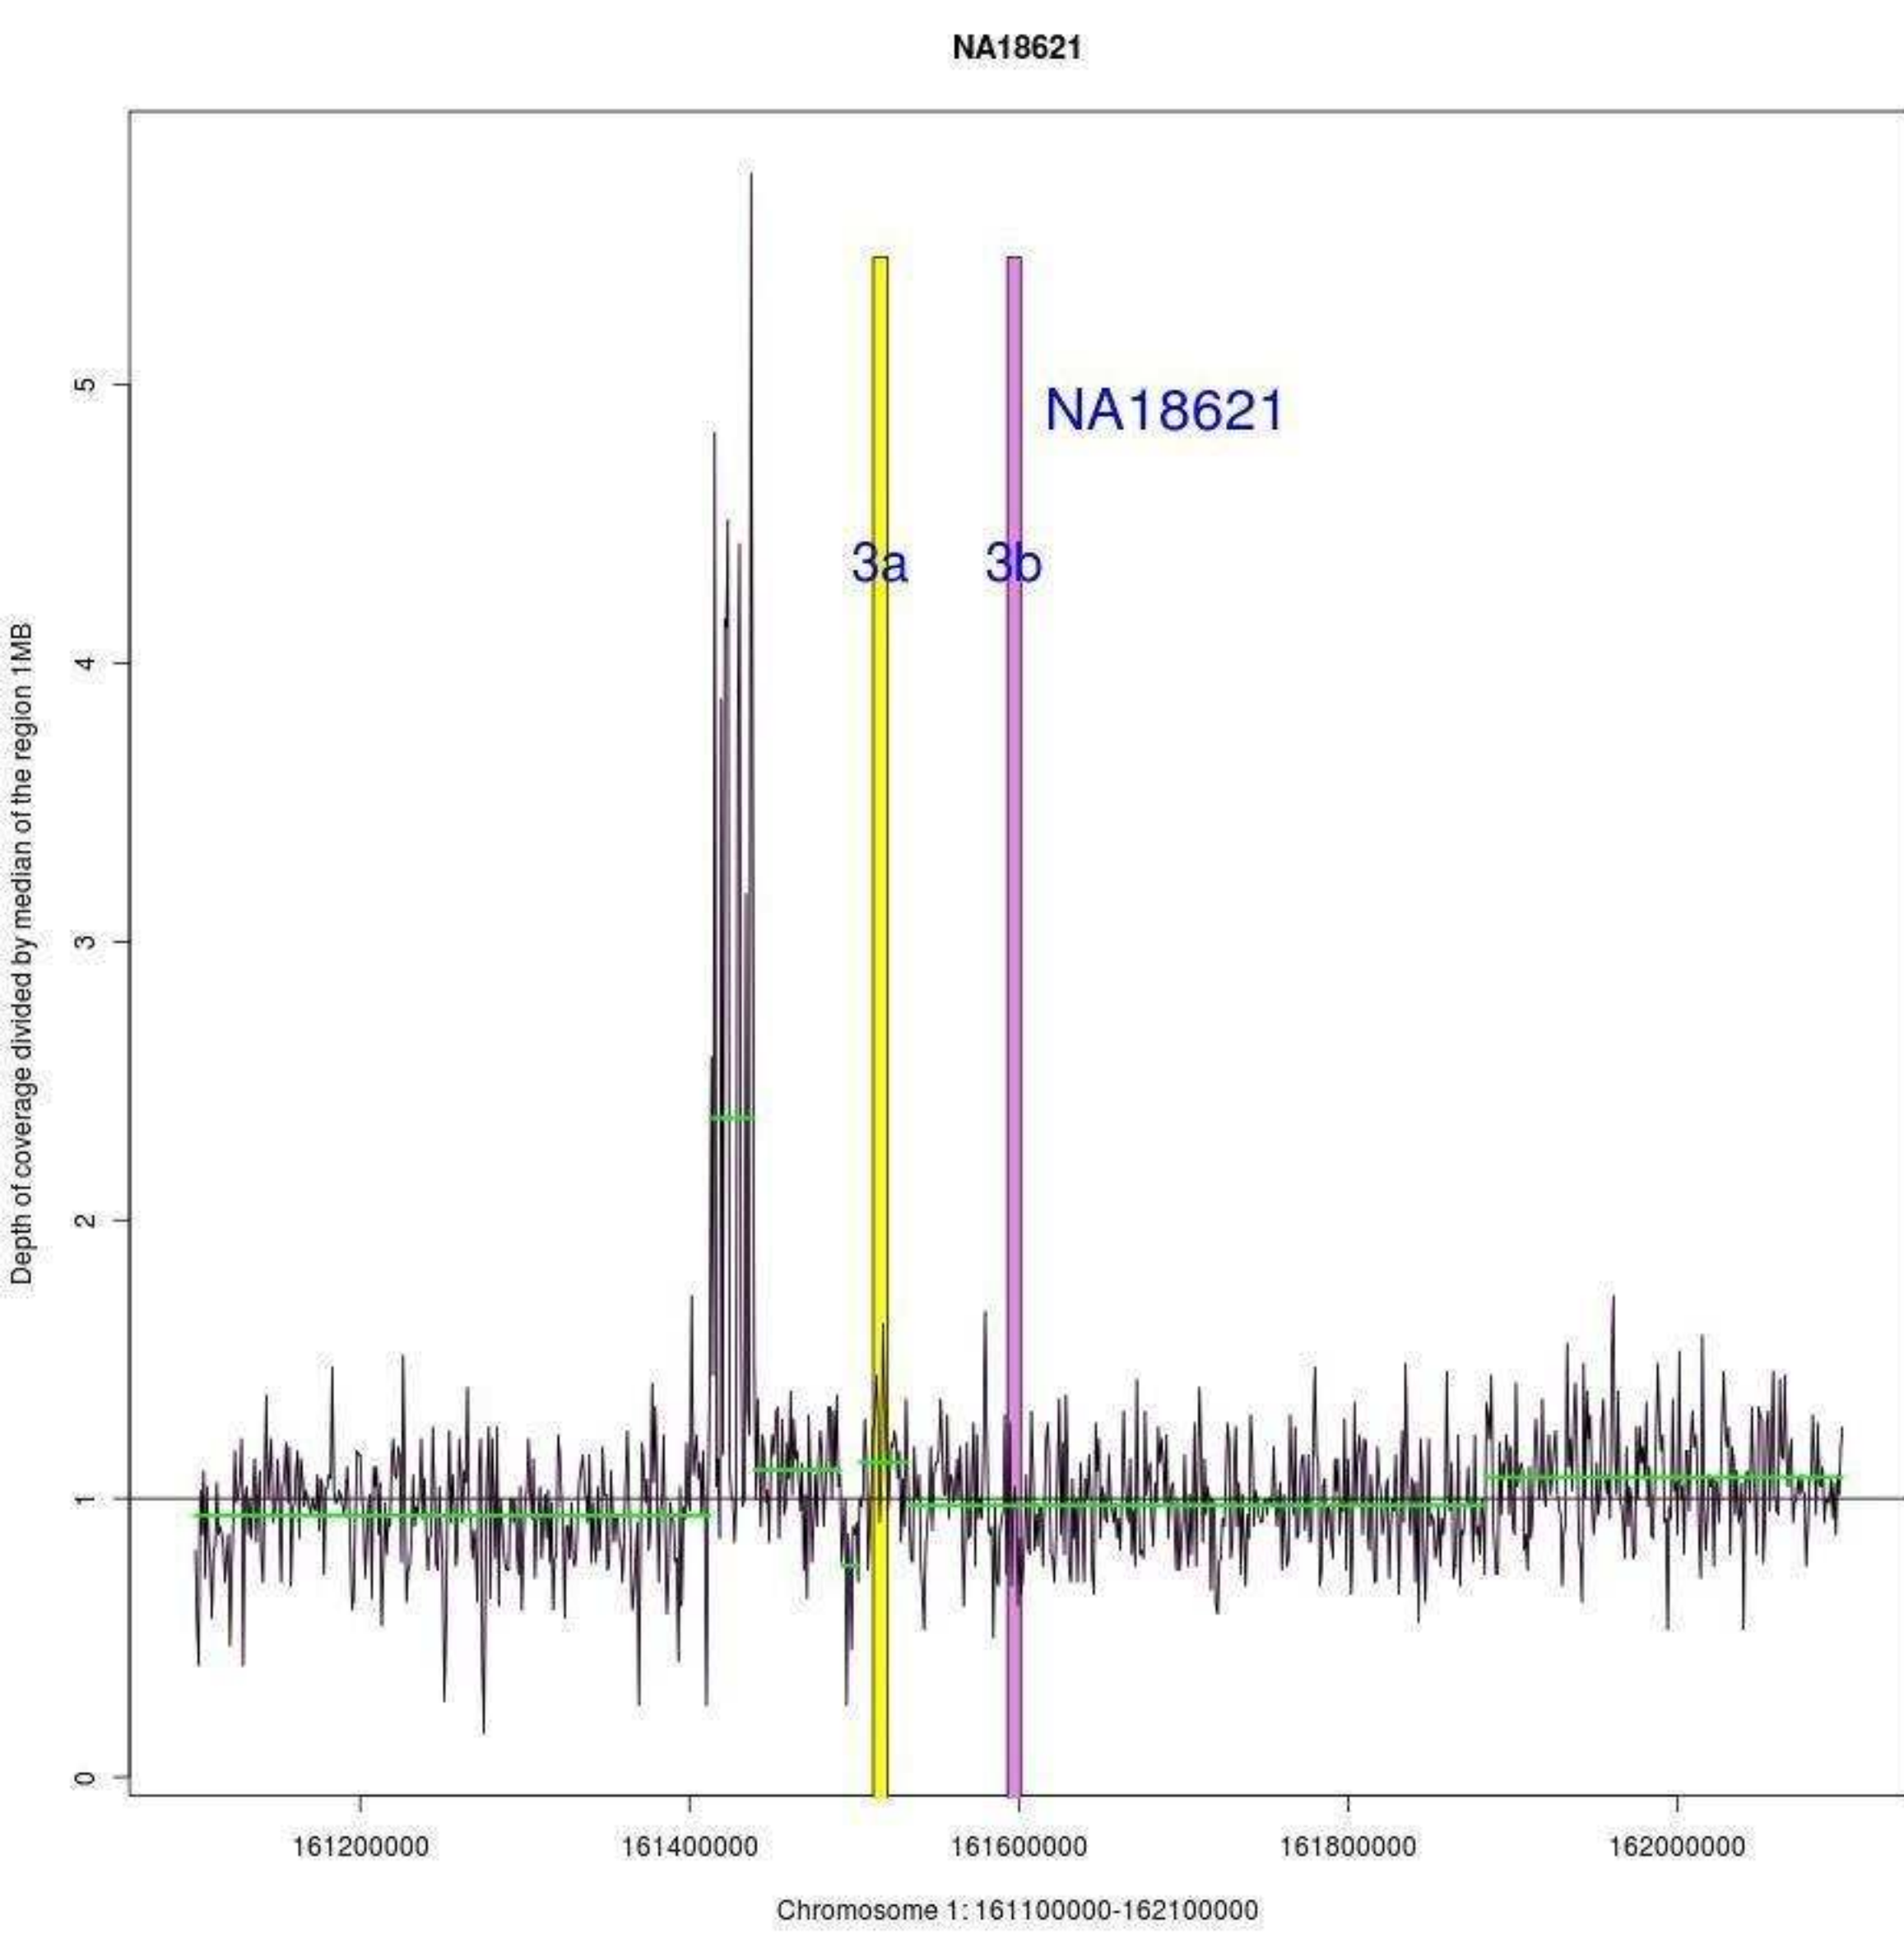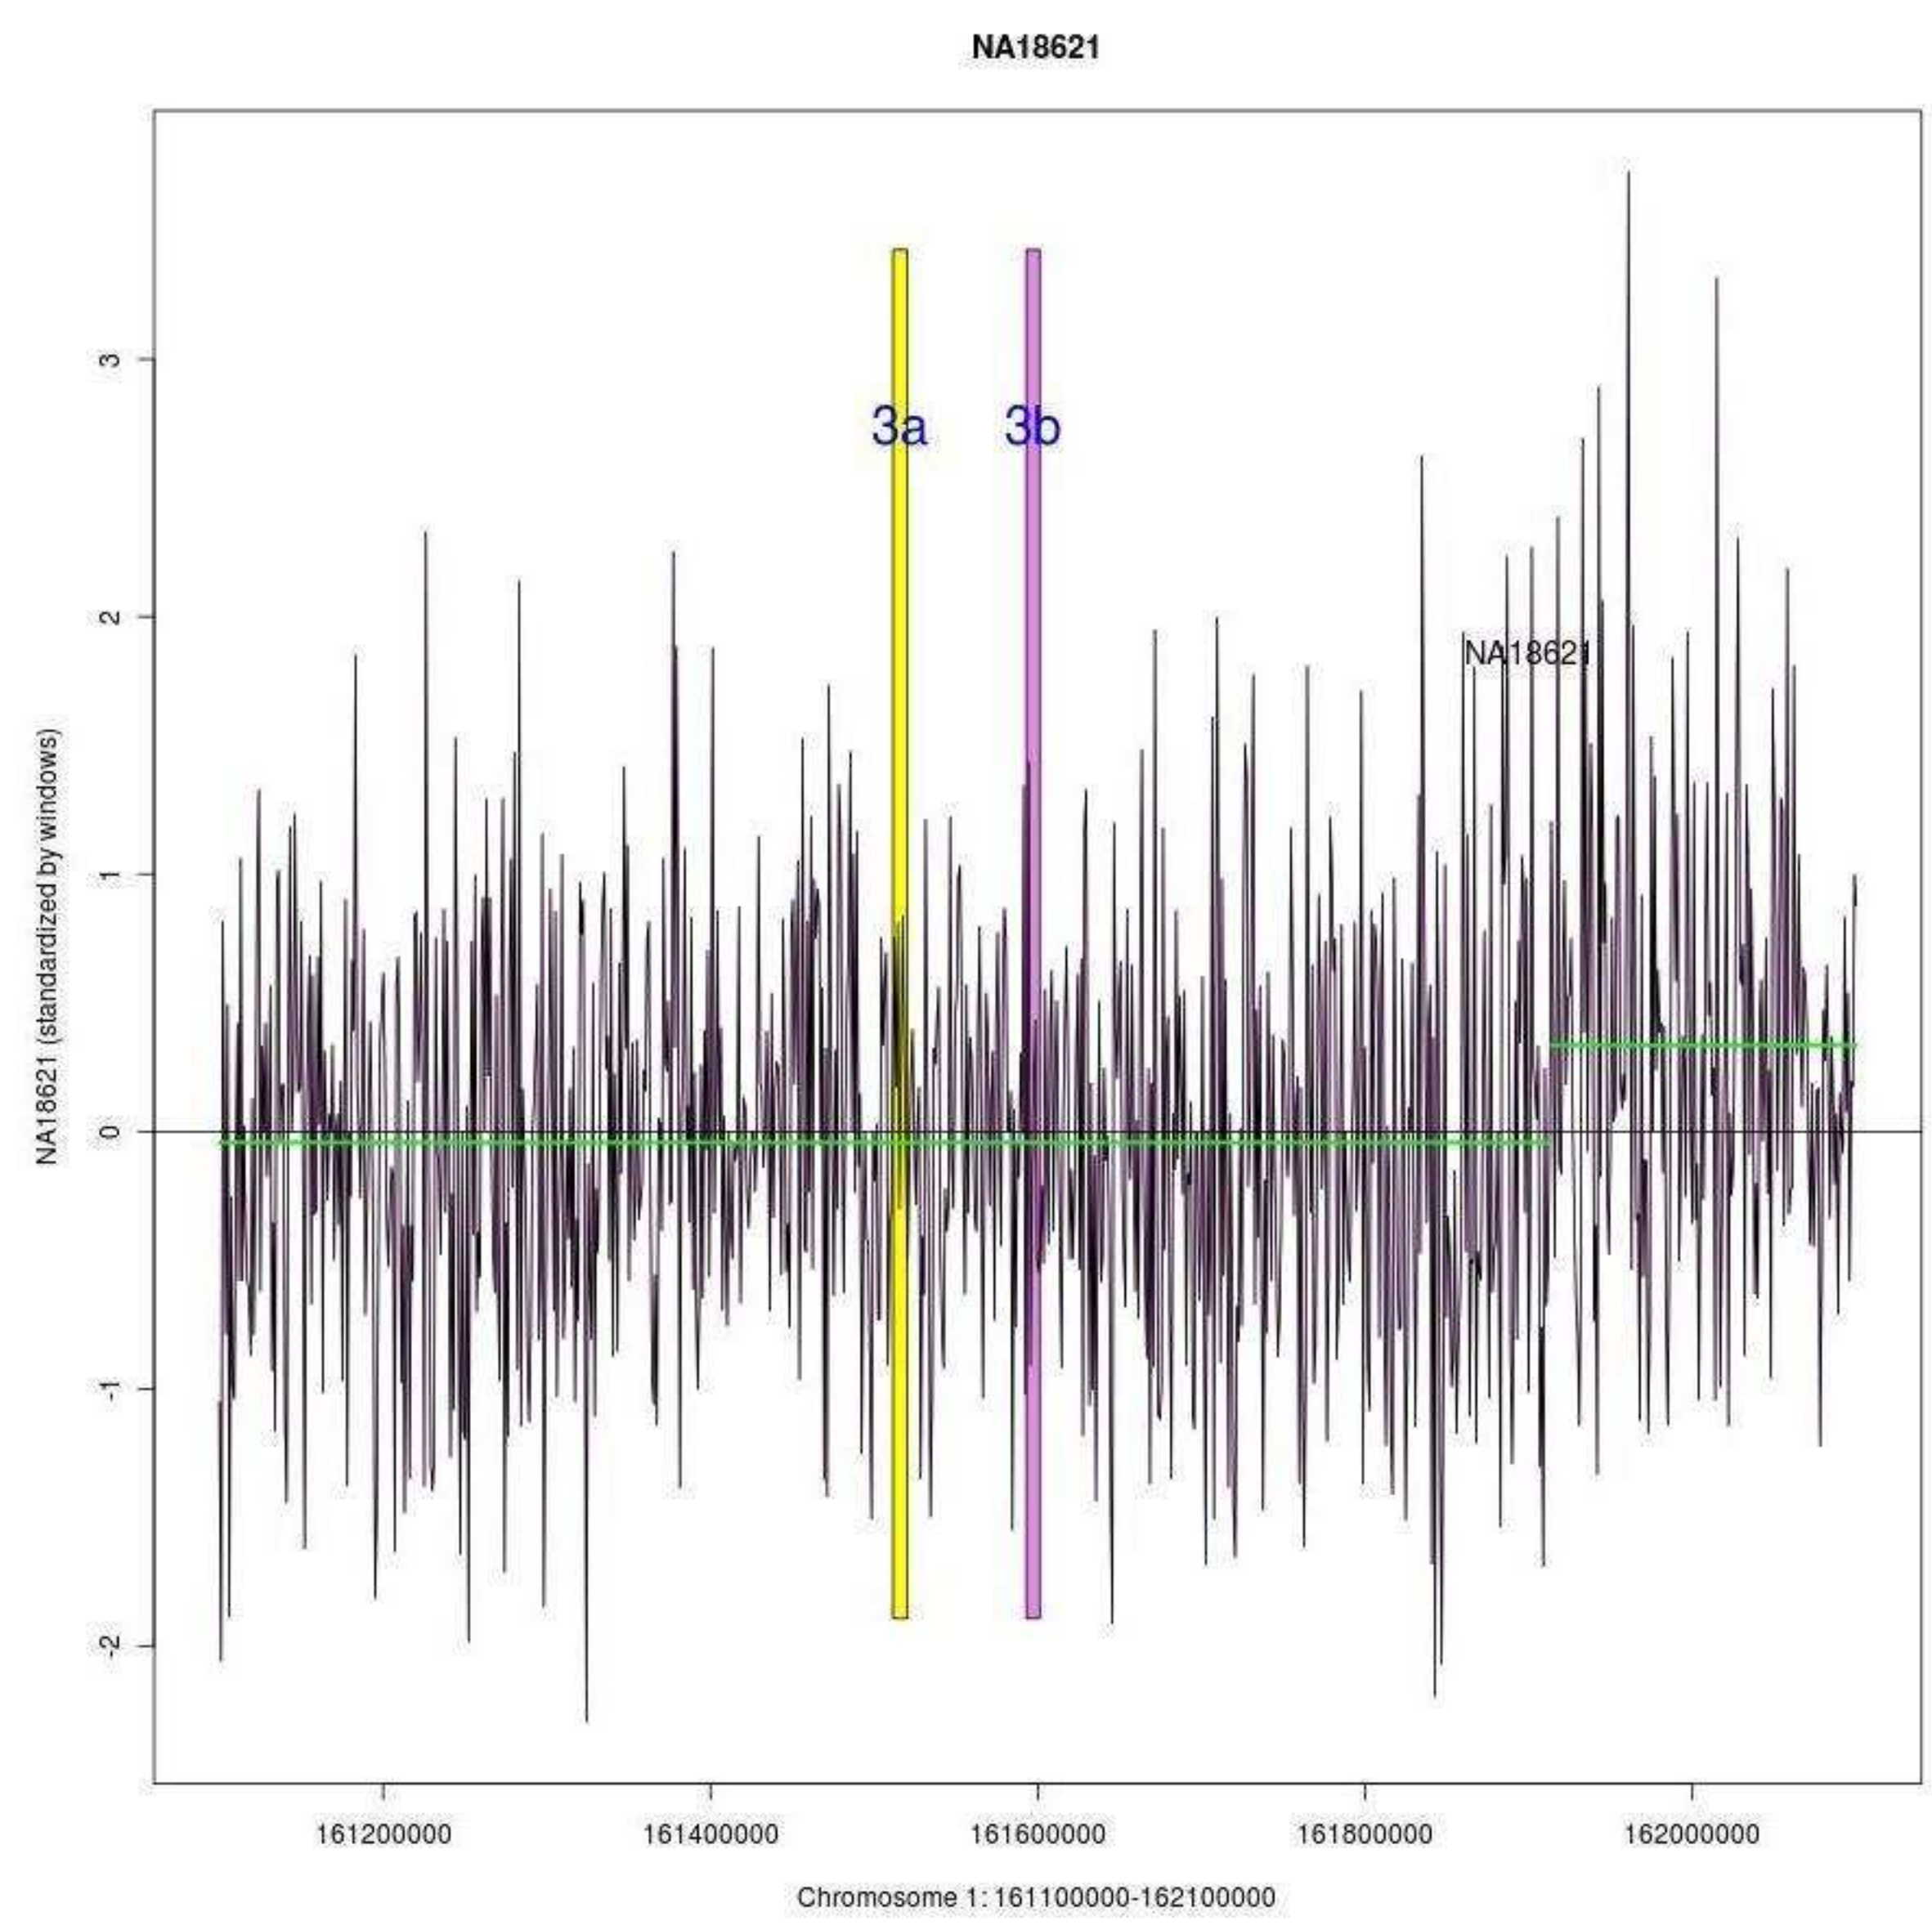



NA18633

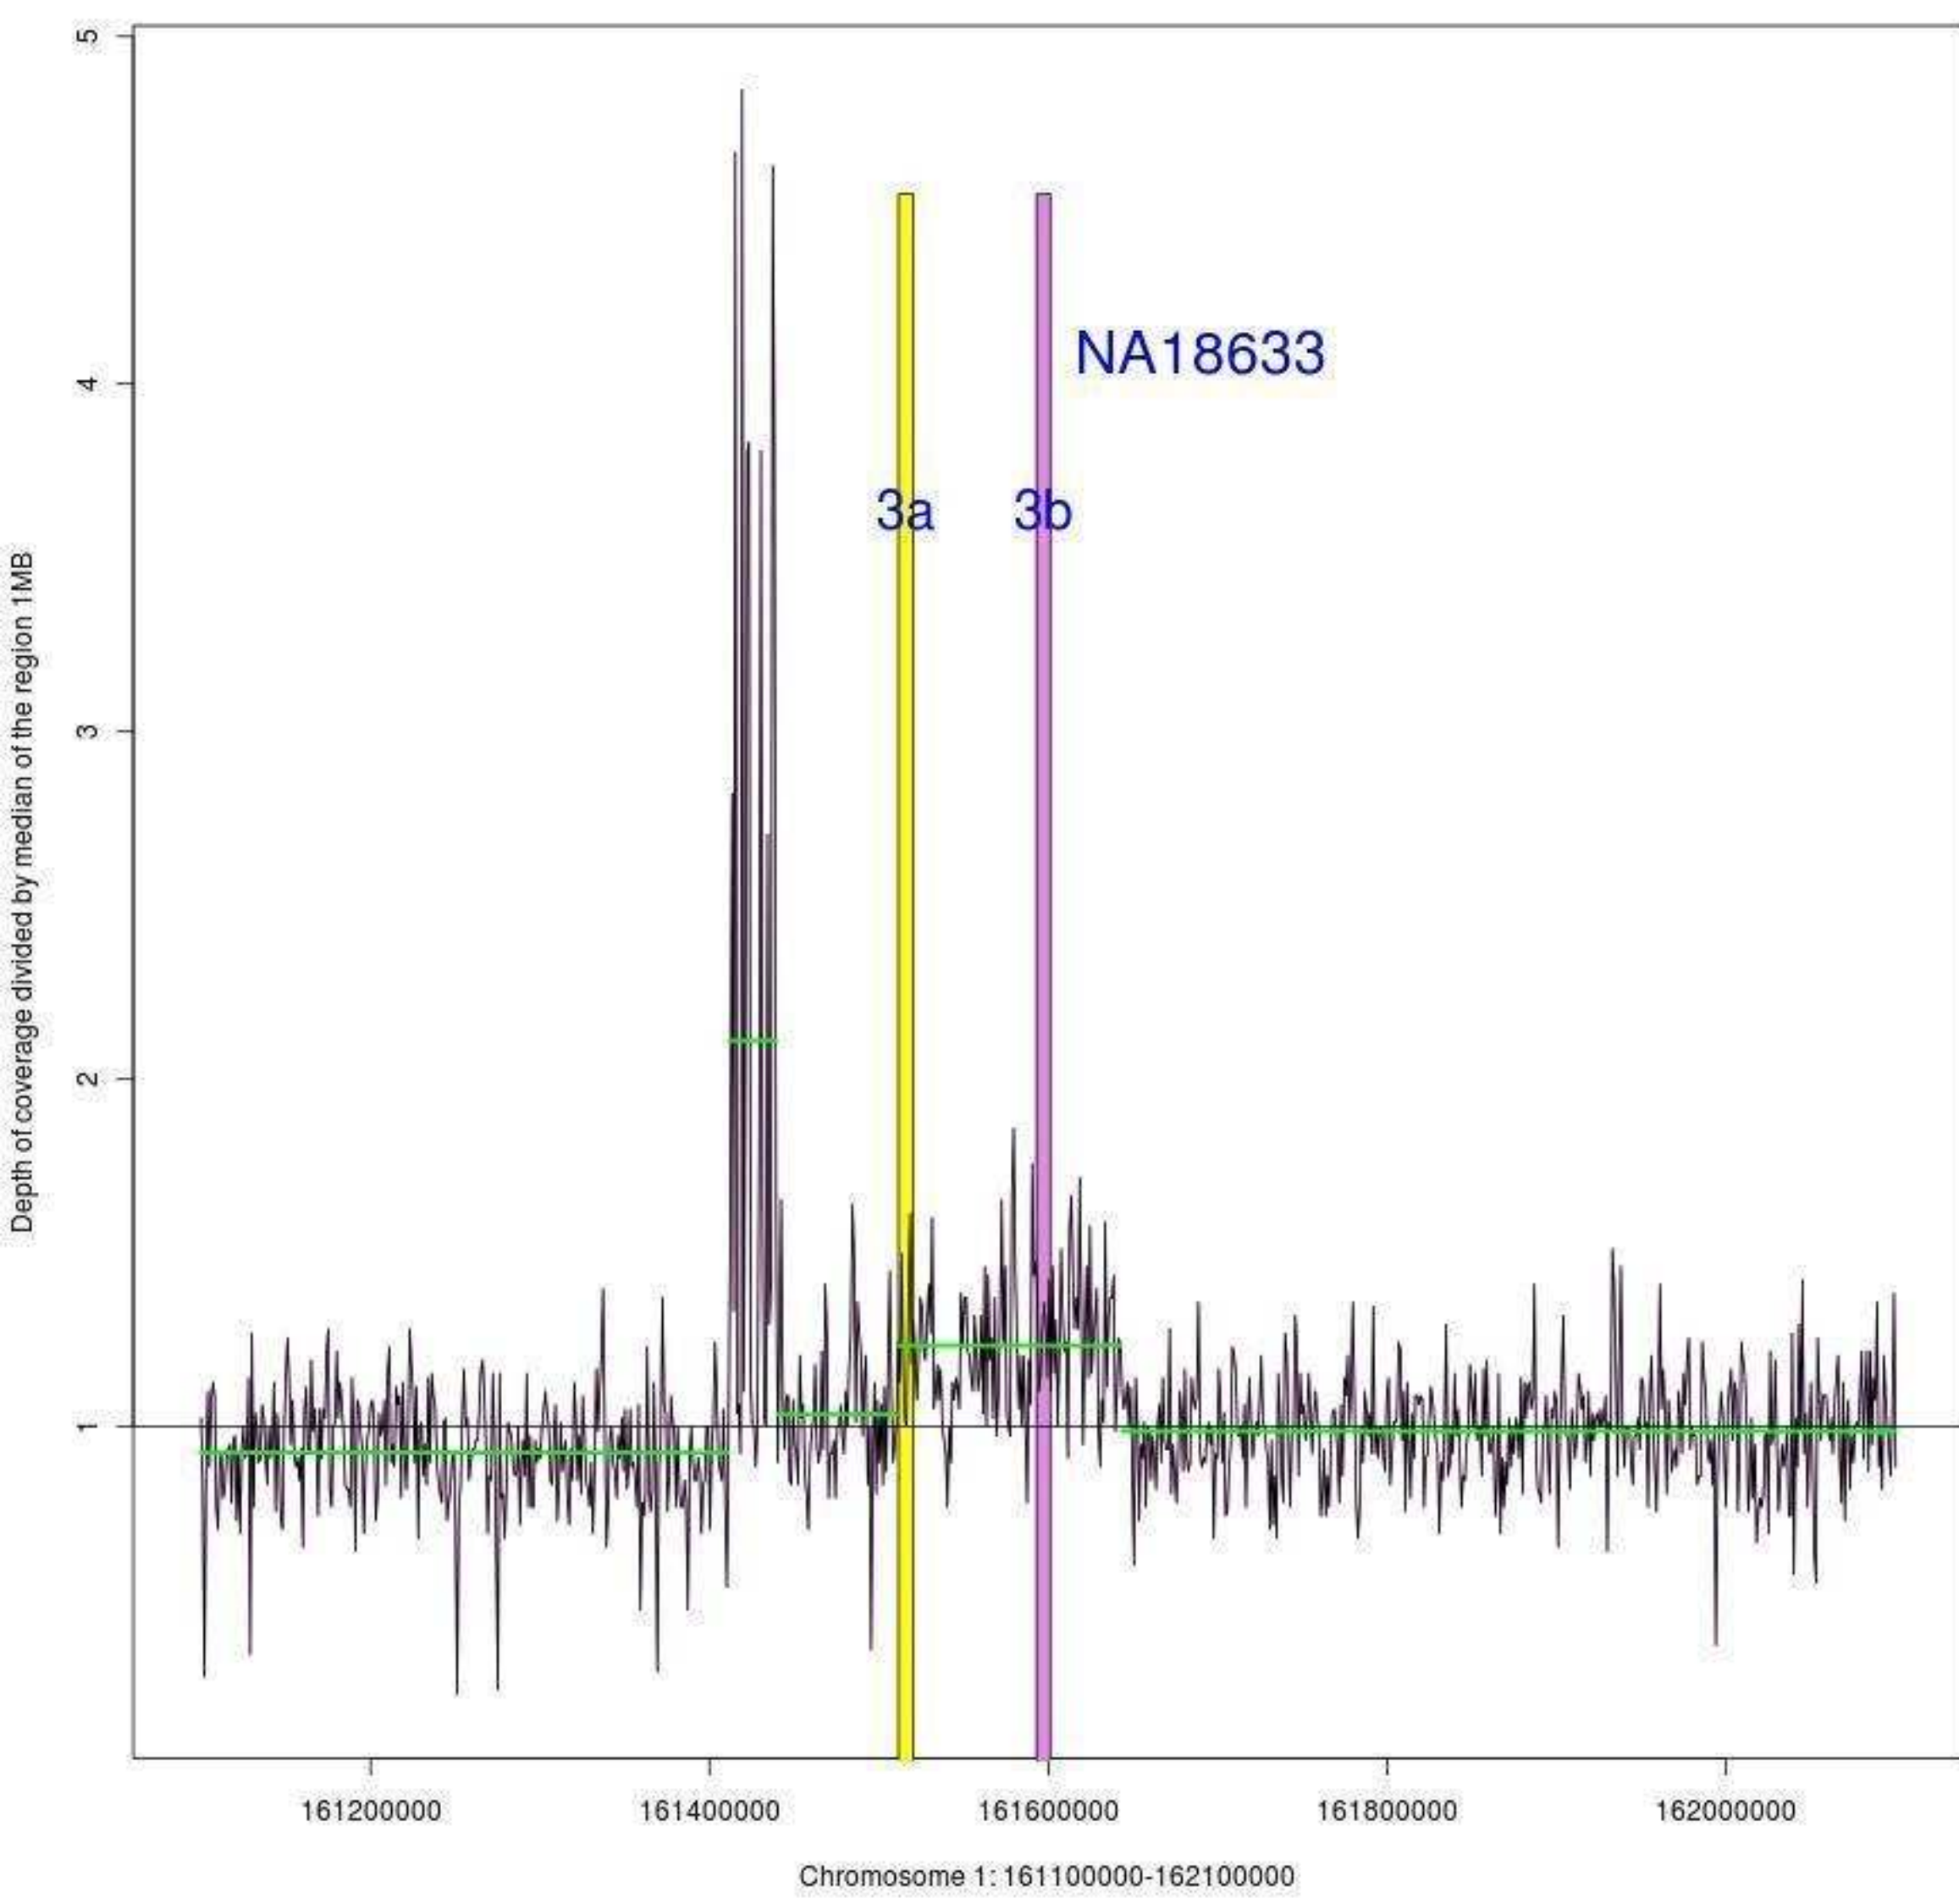

NA18633

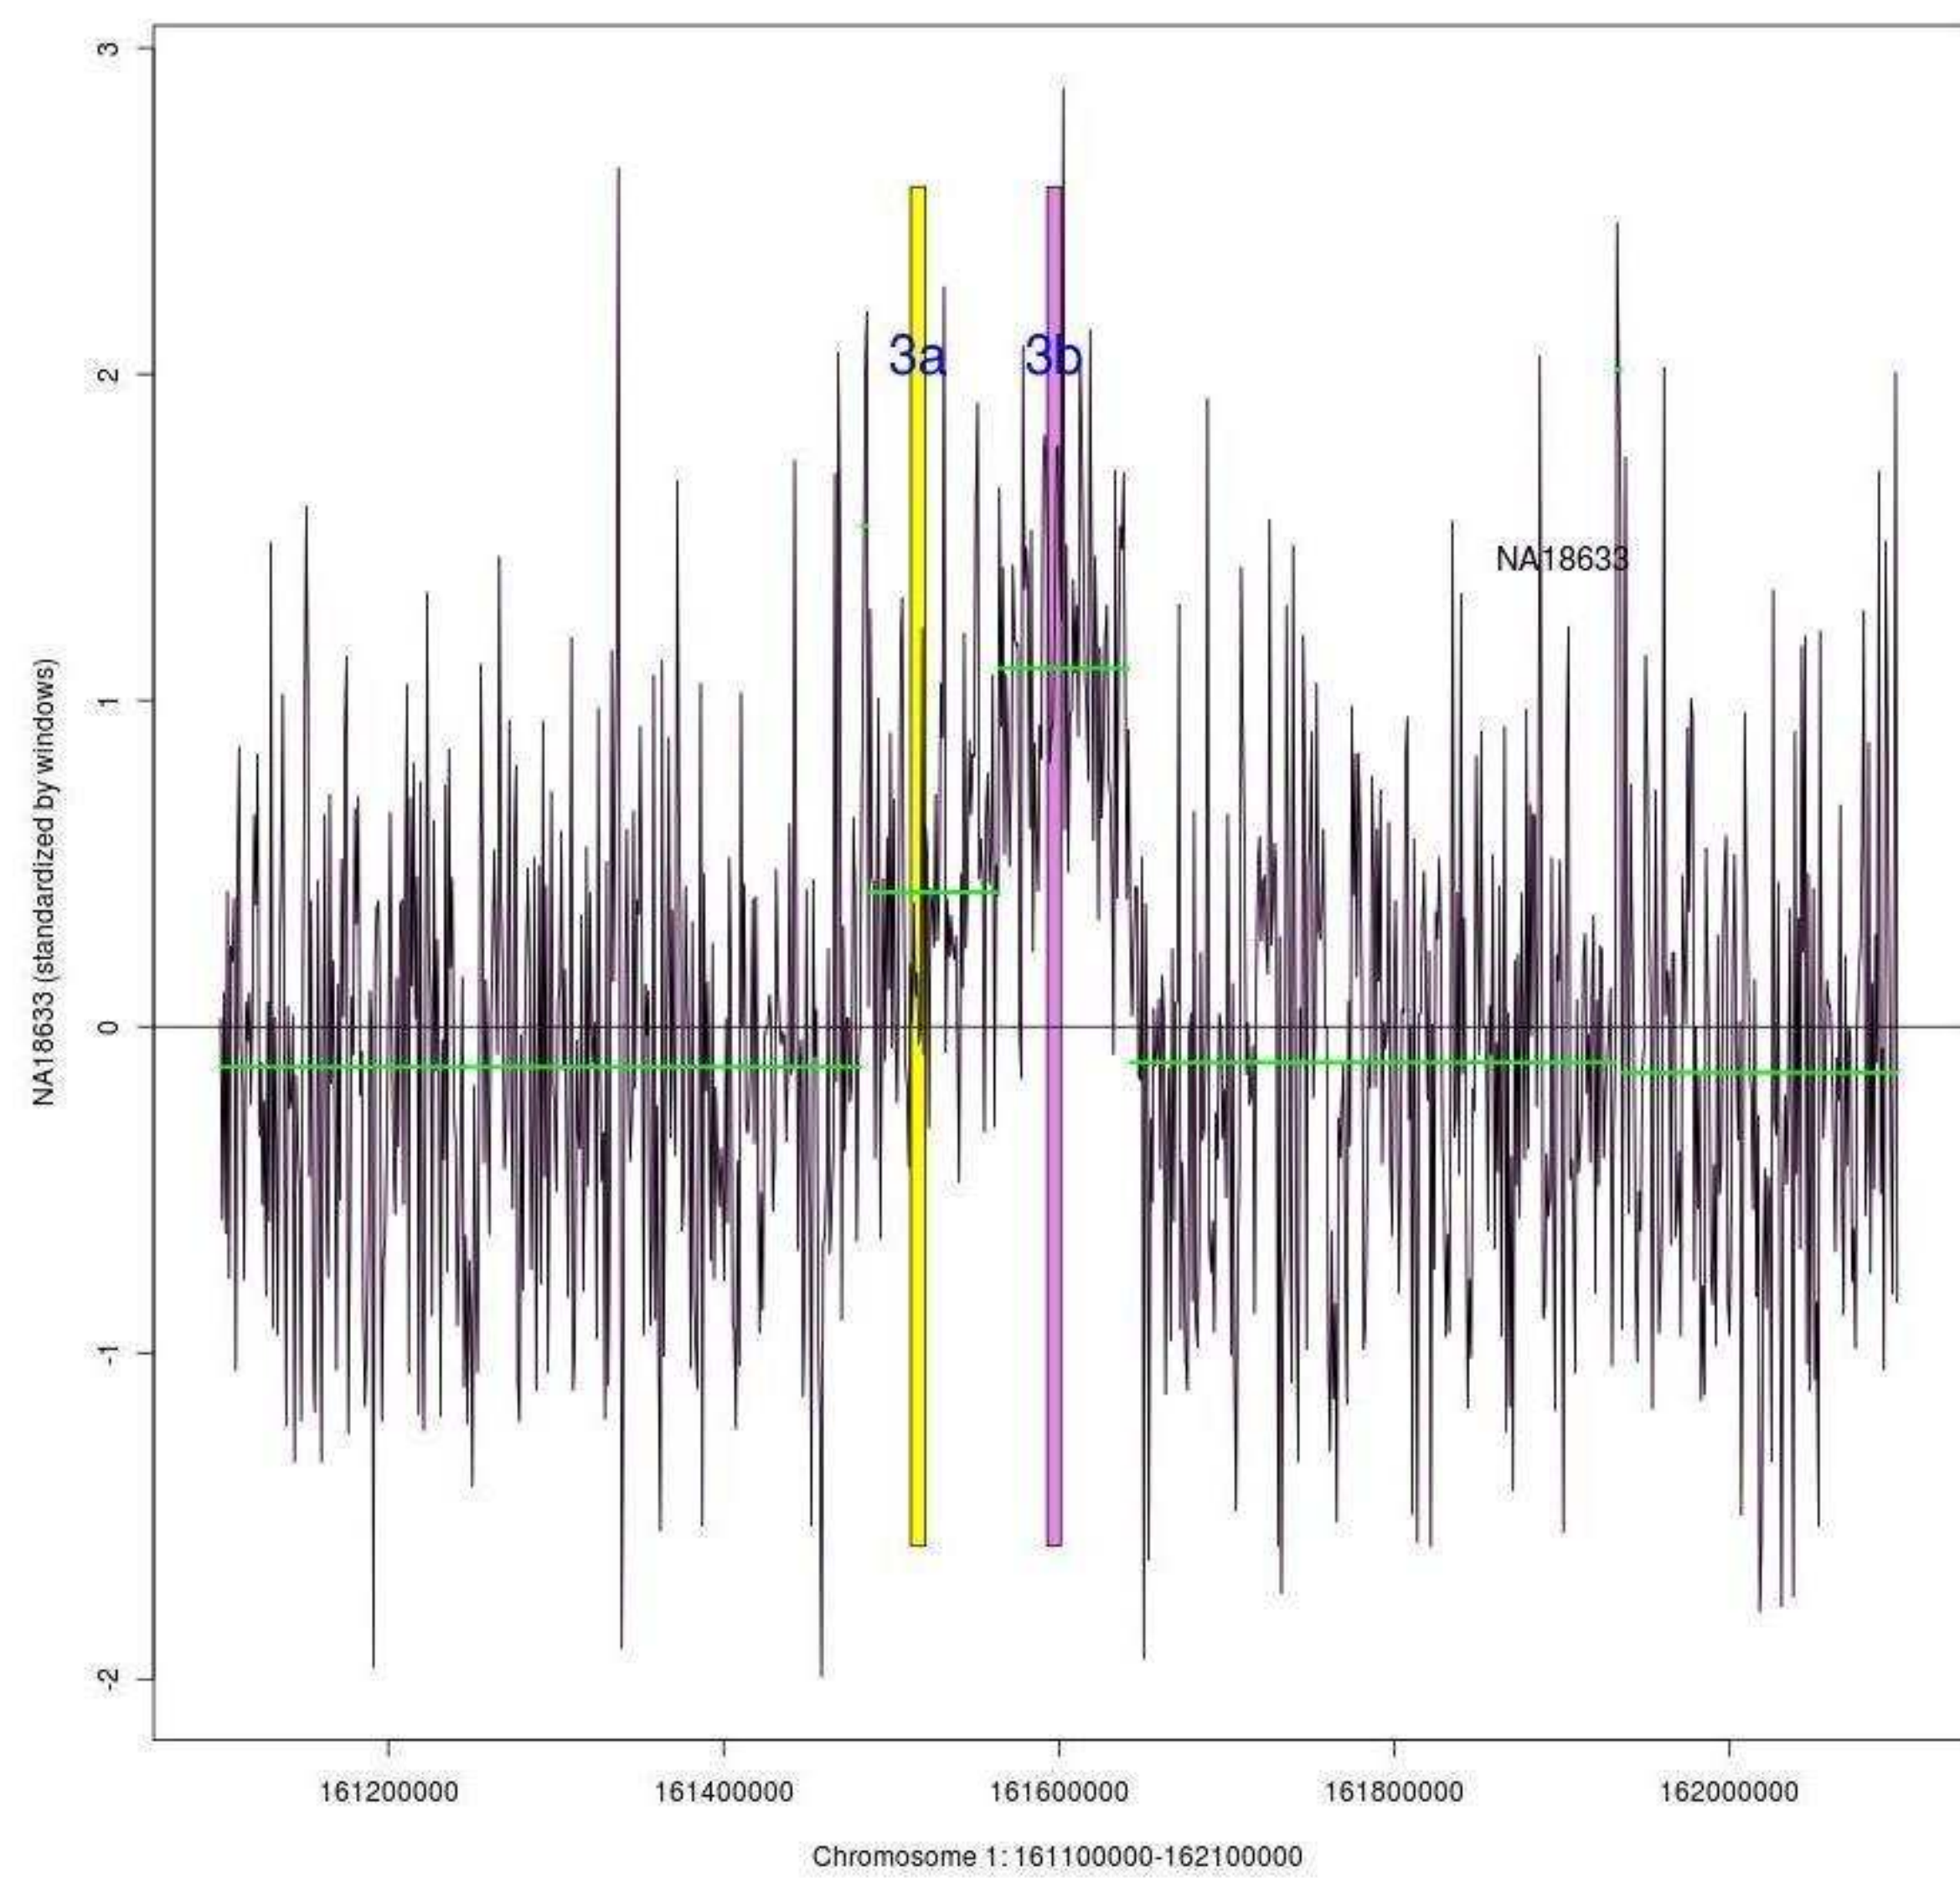

NA18636

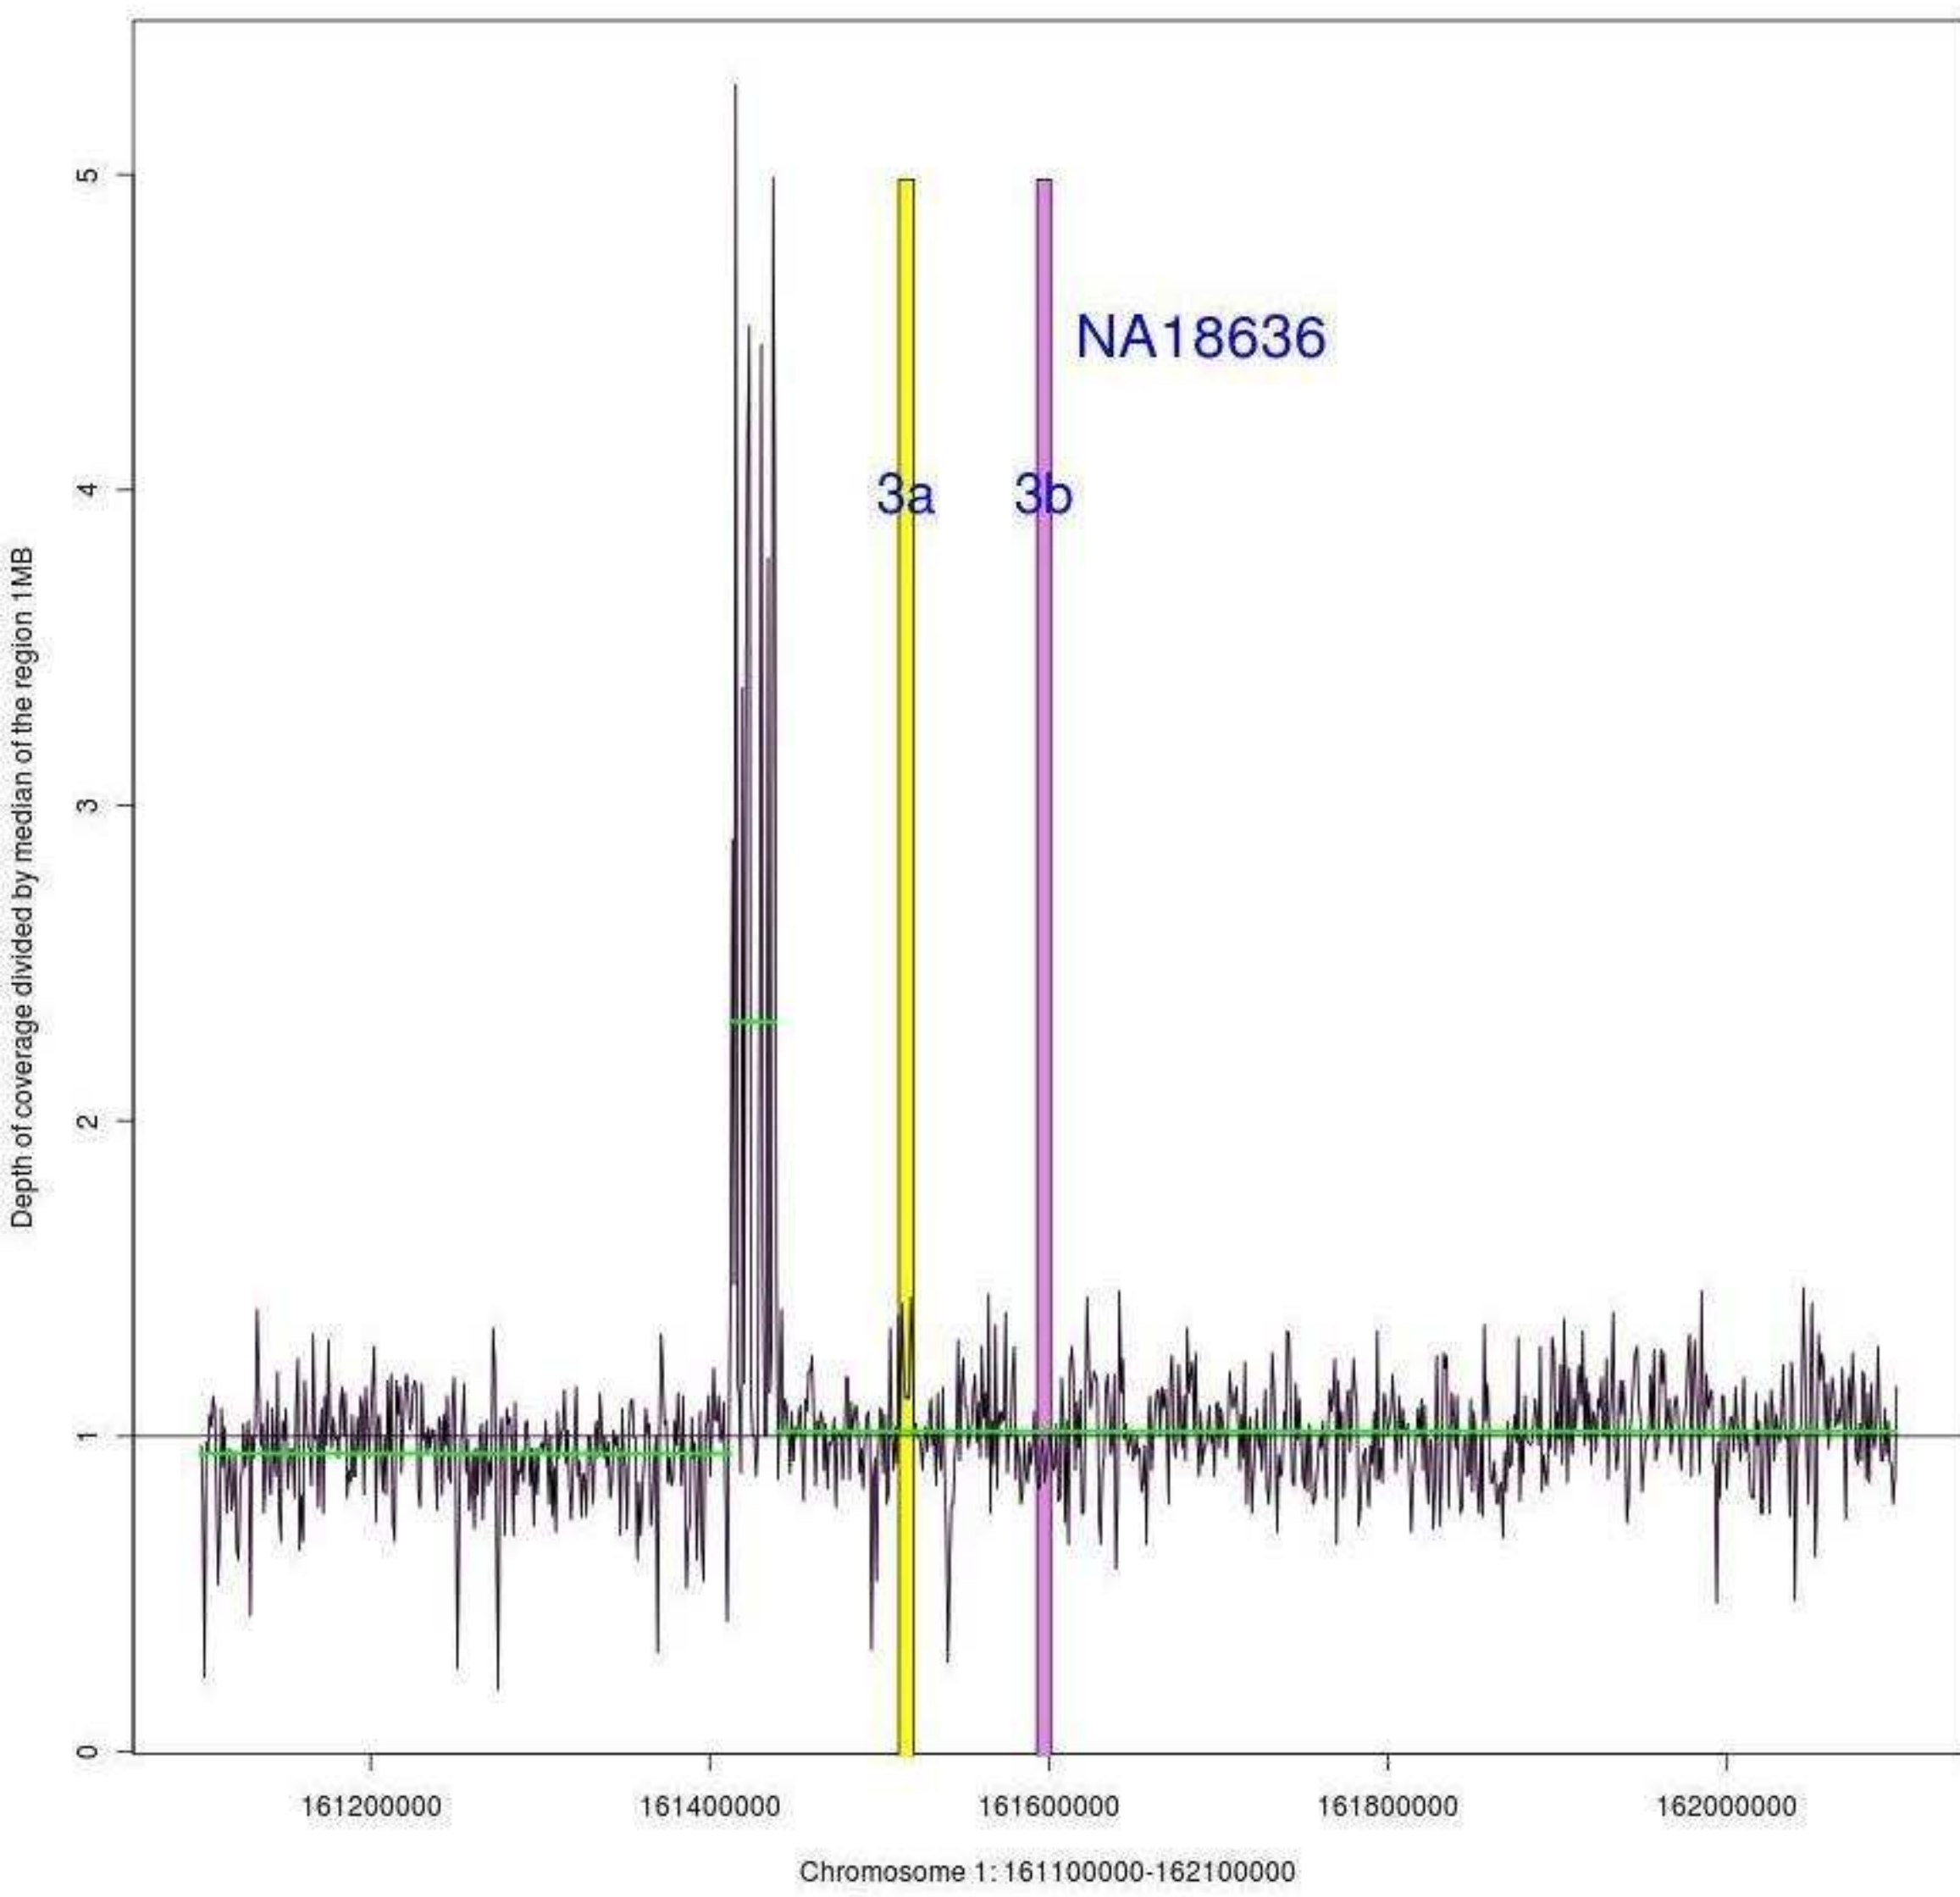

NA18636

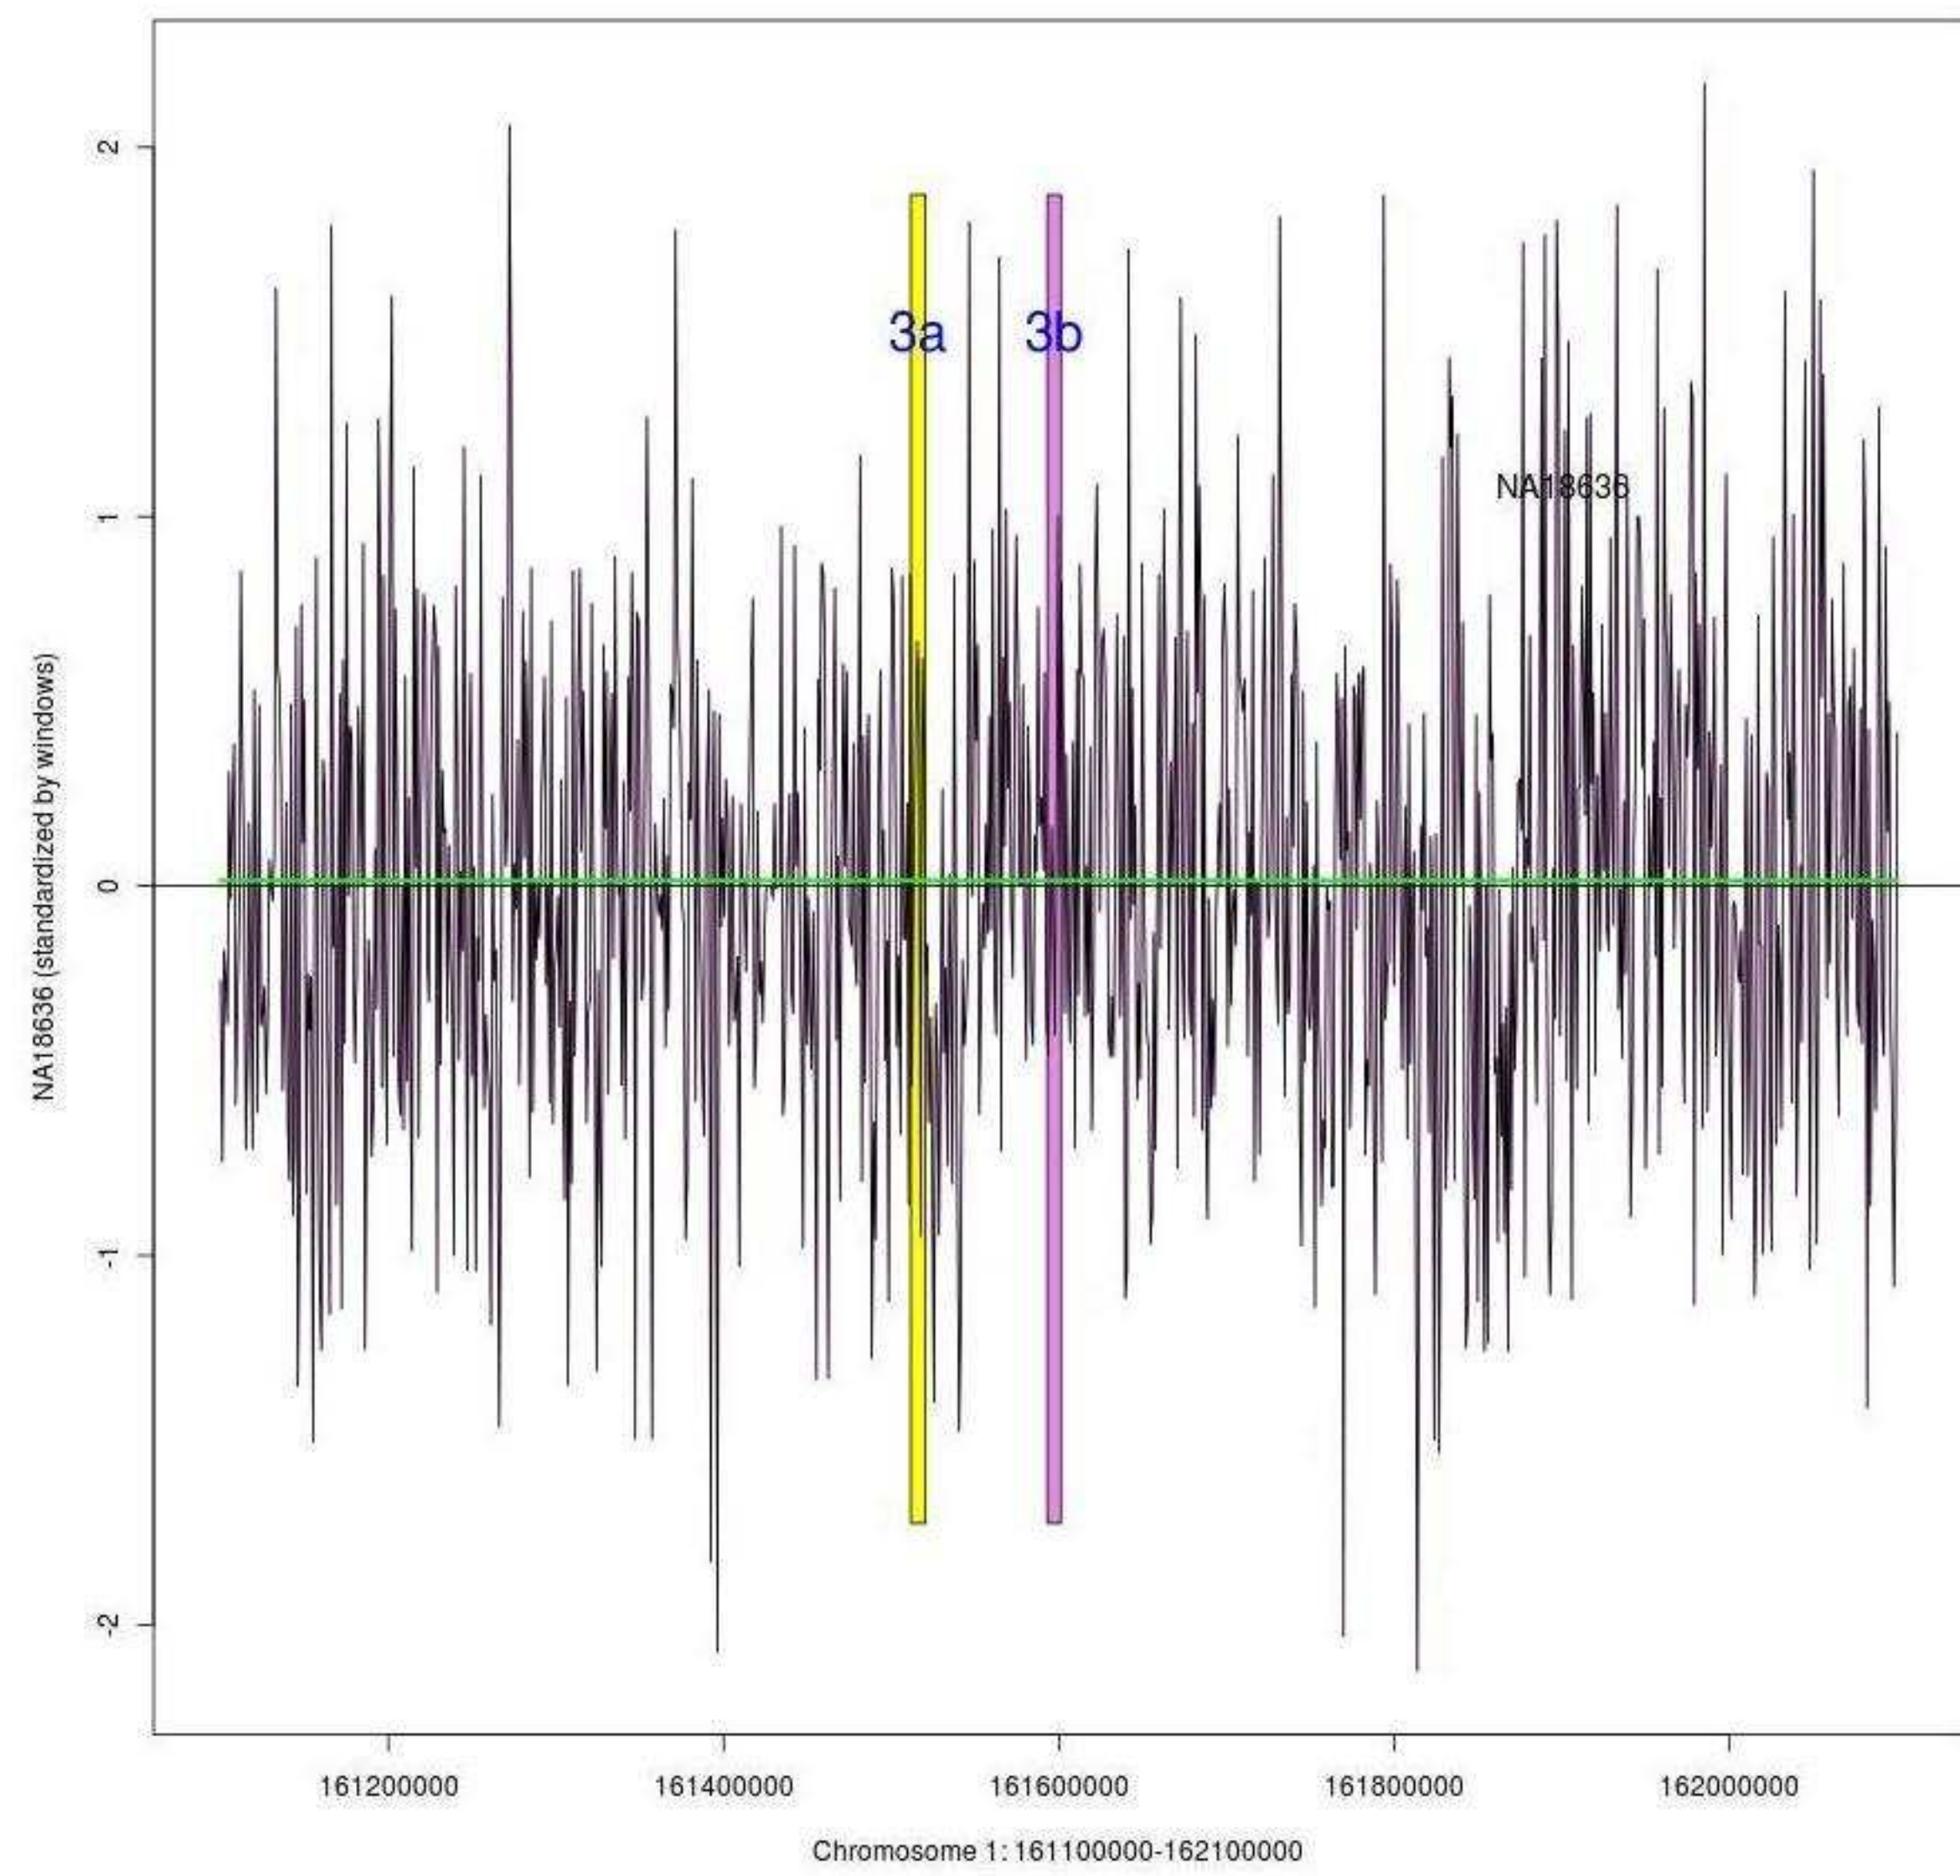

NA18637

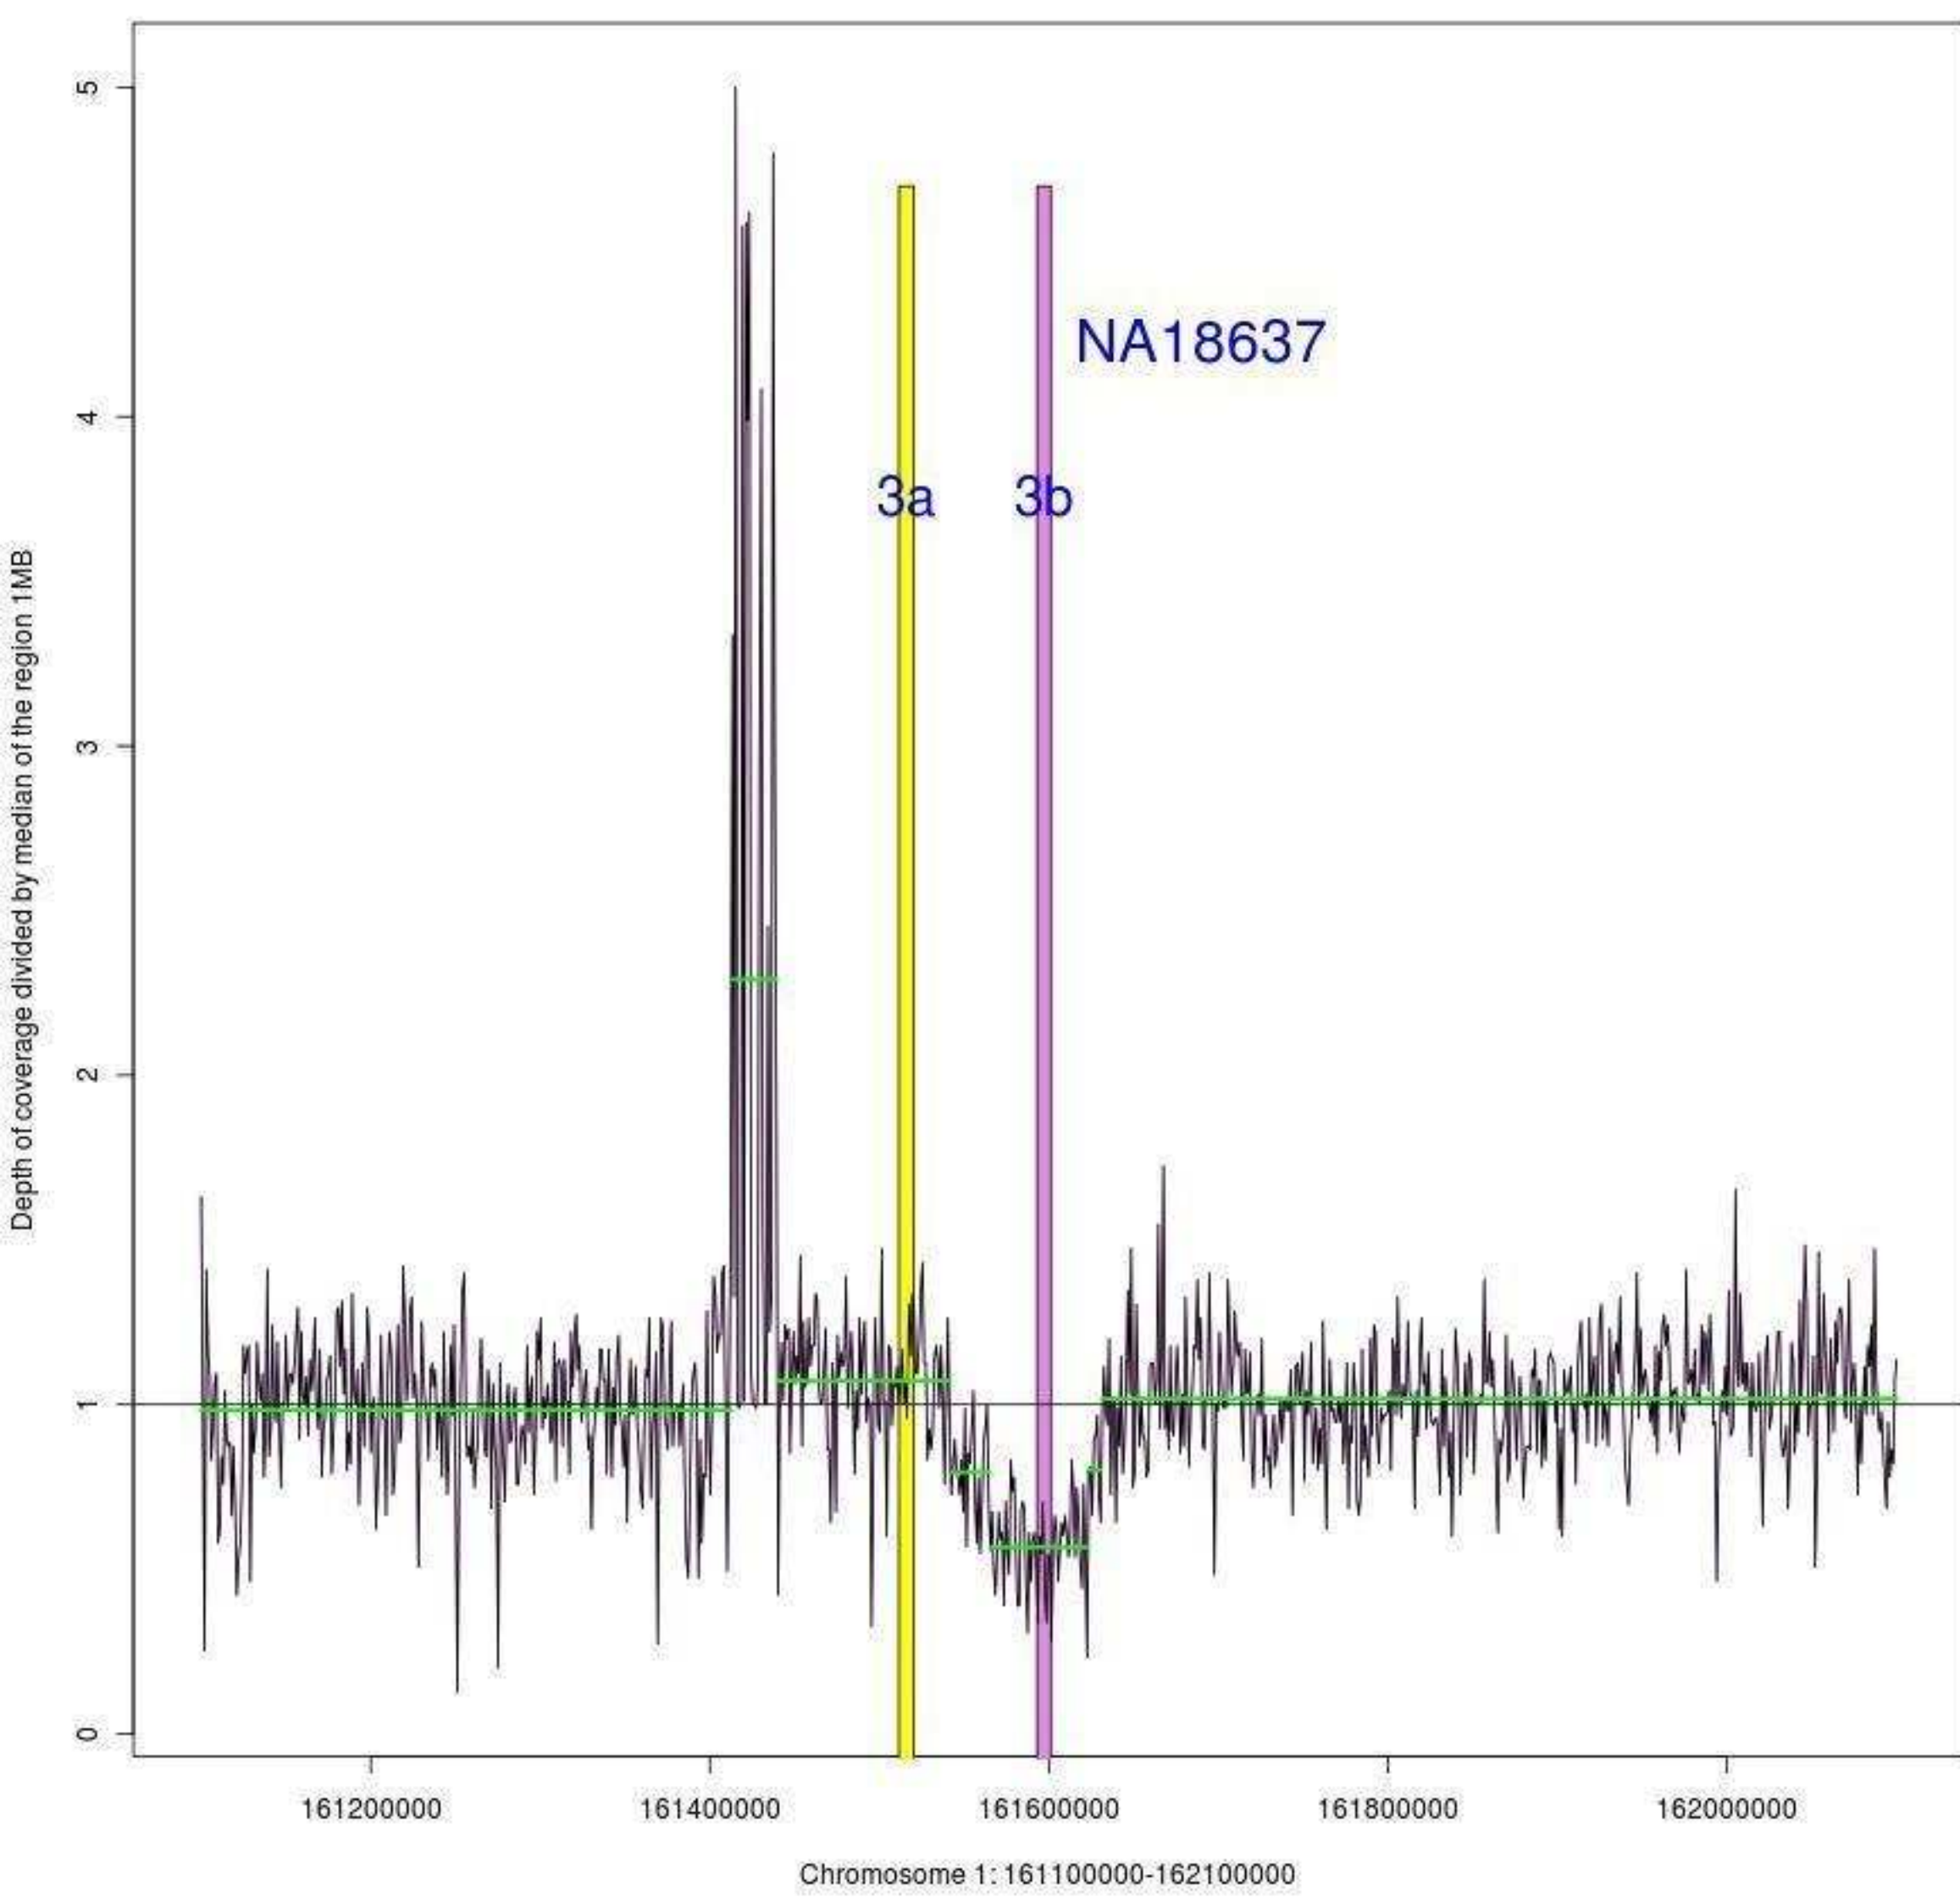

NA18637

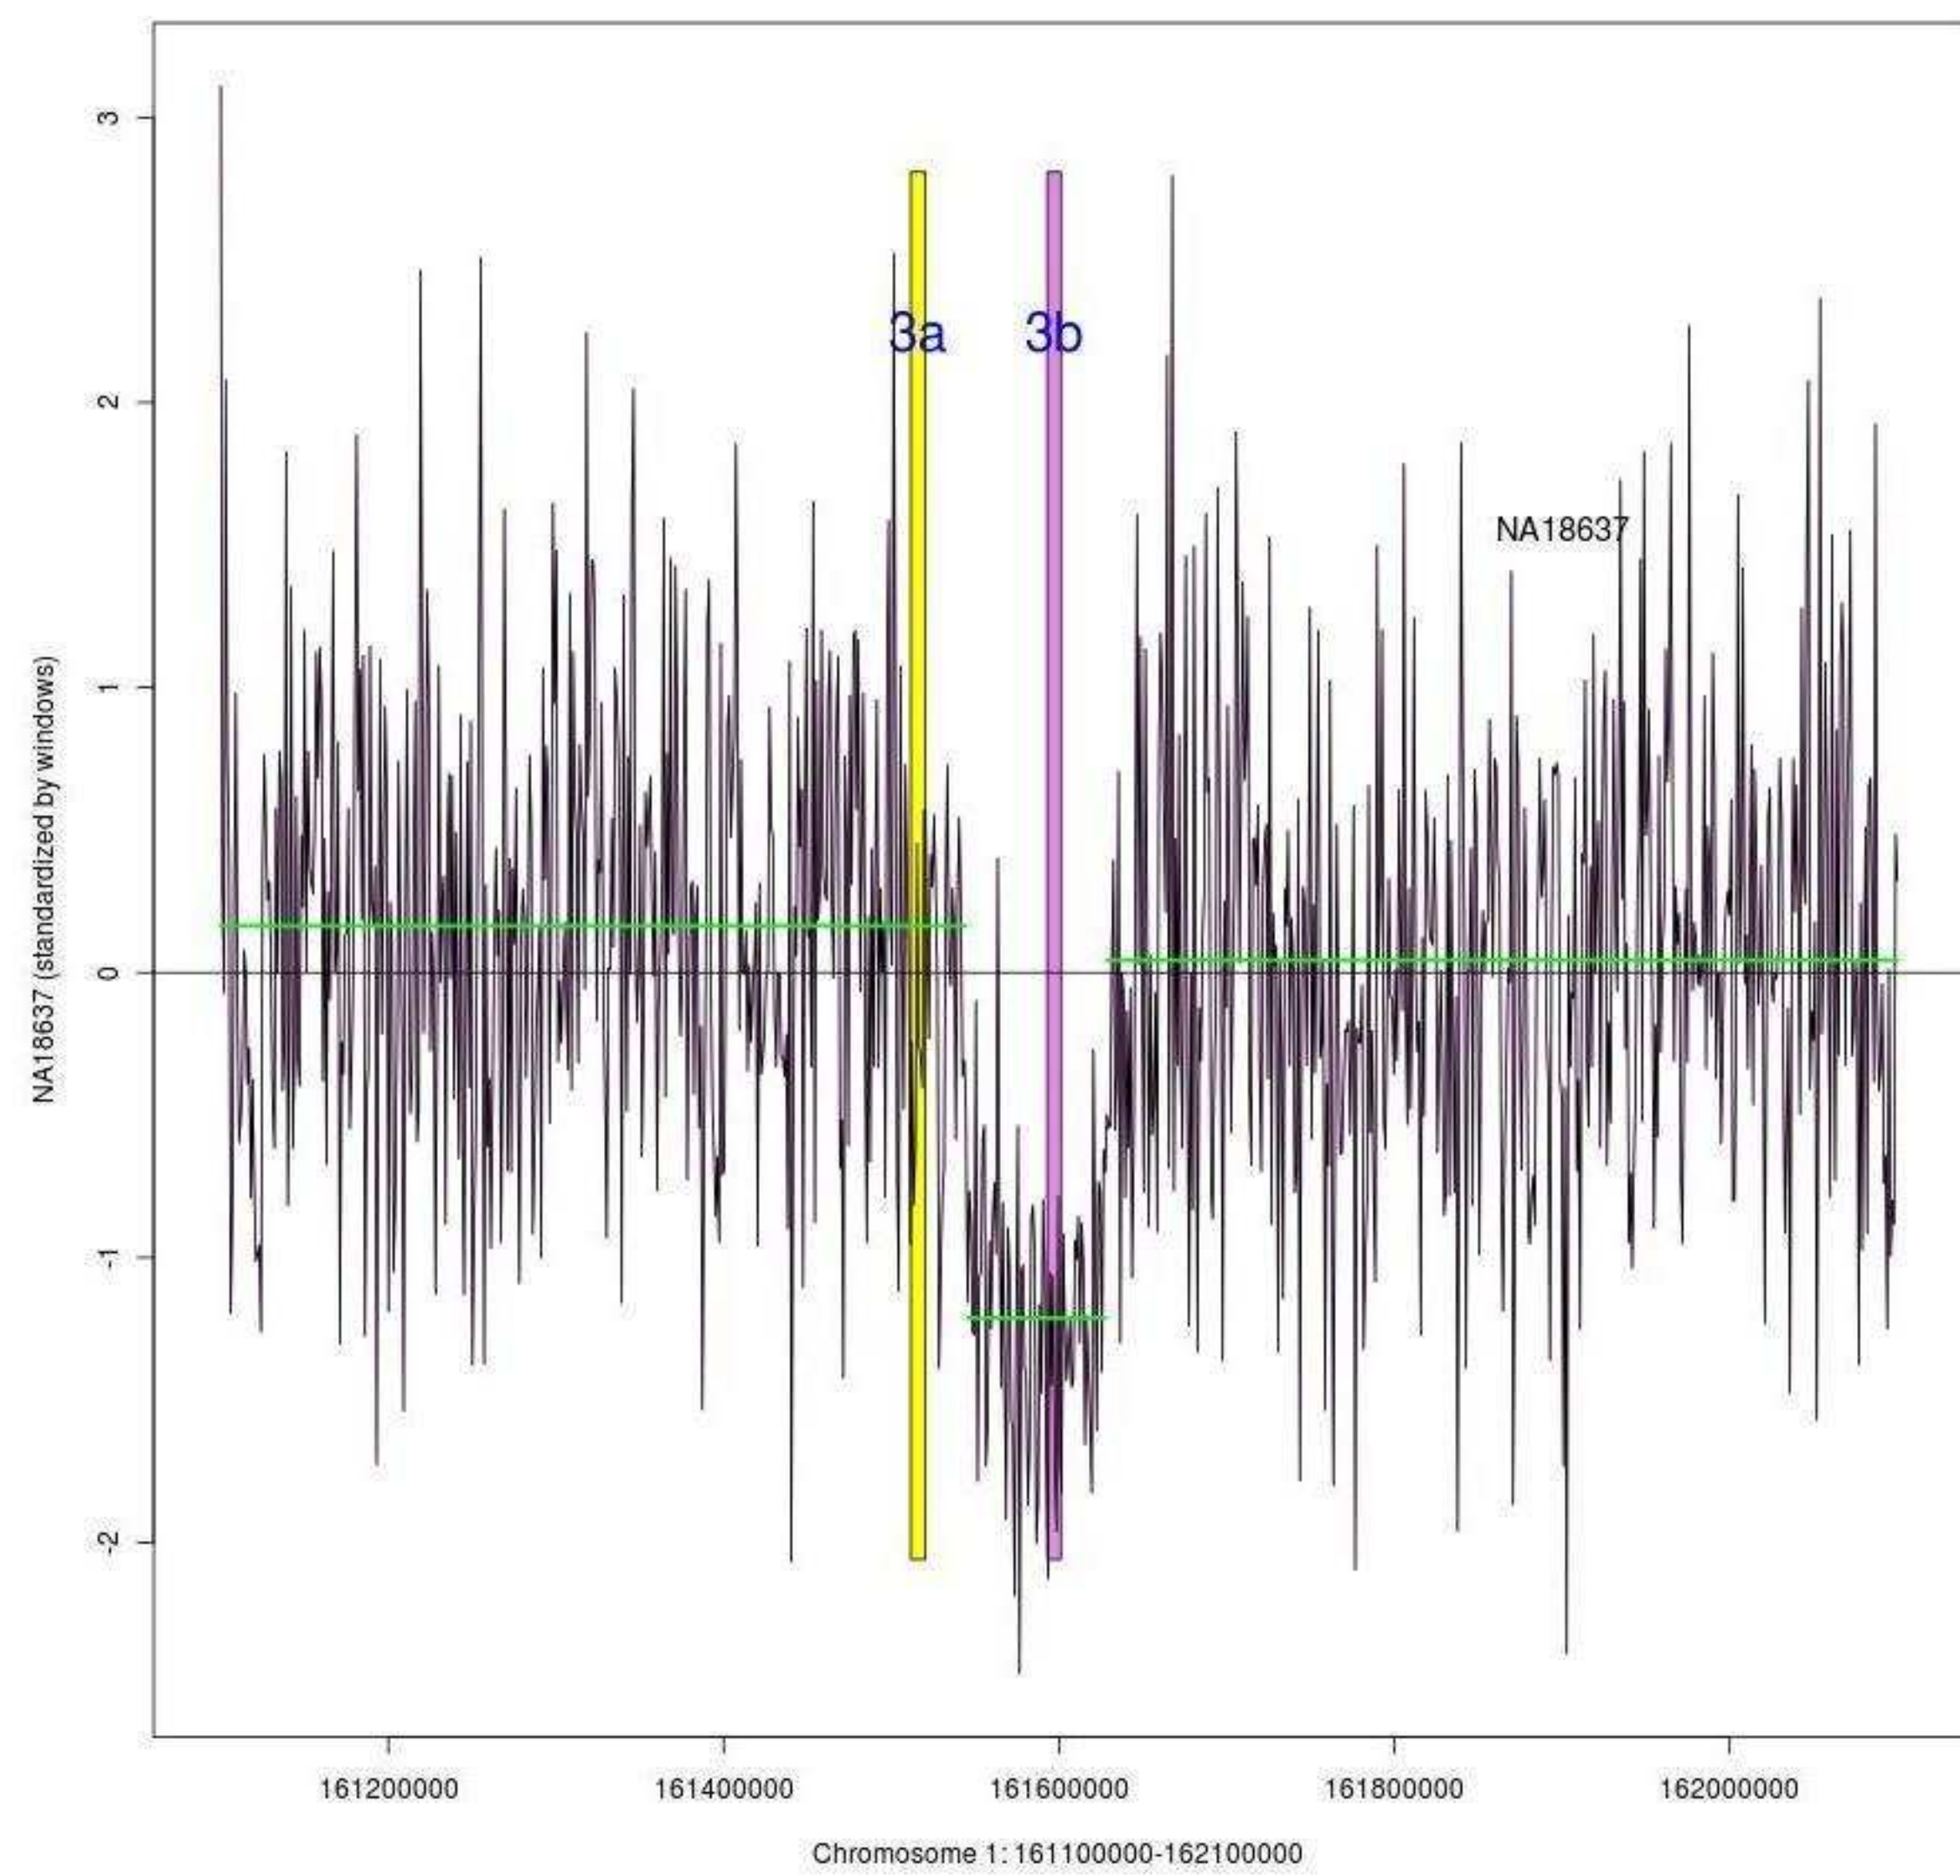



NA18853

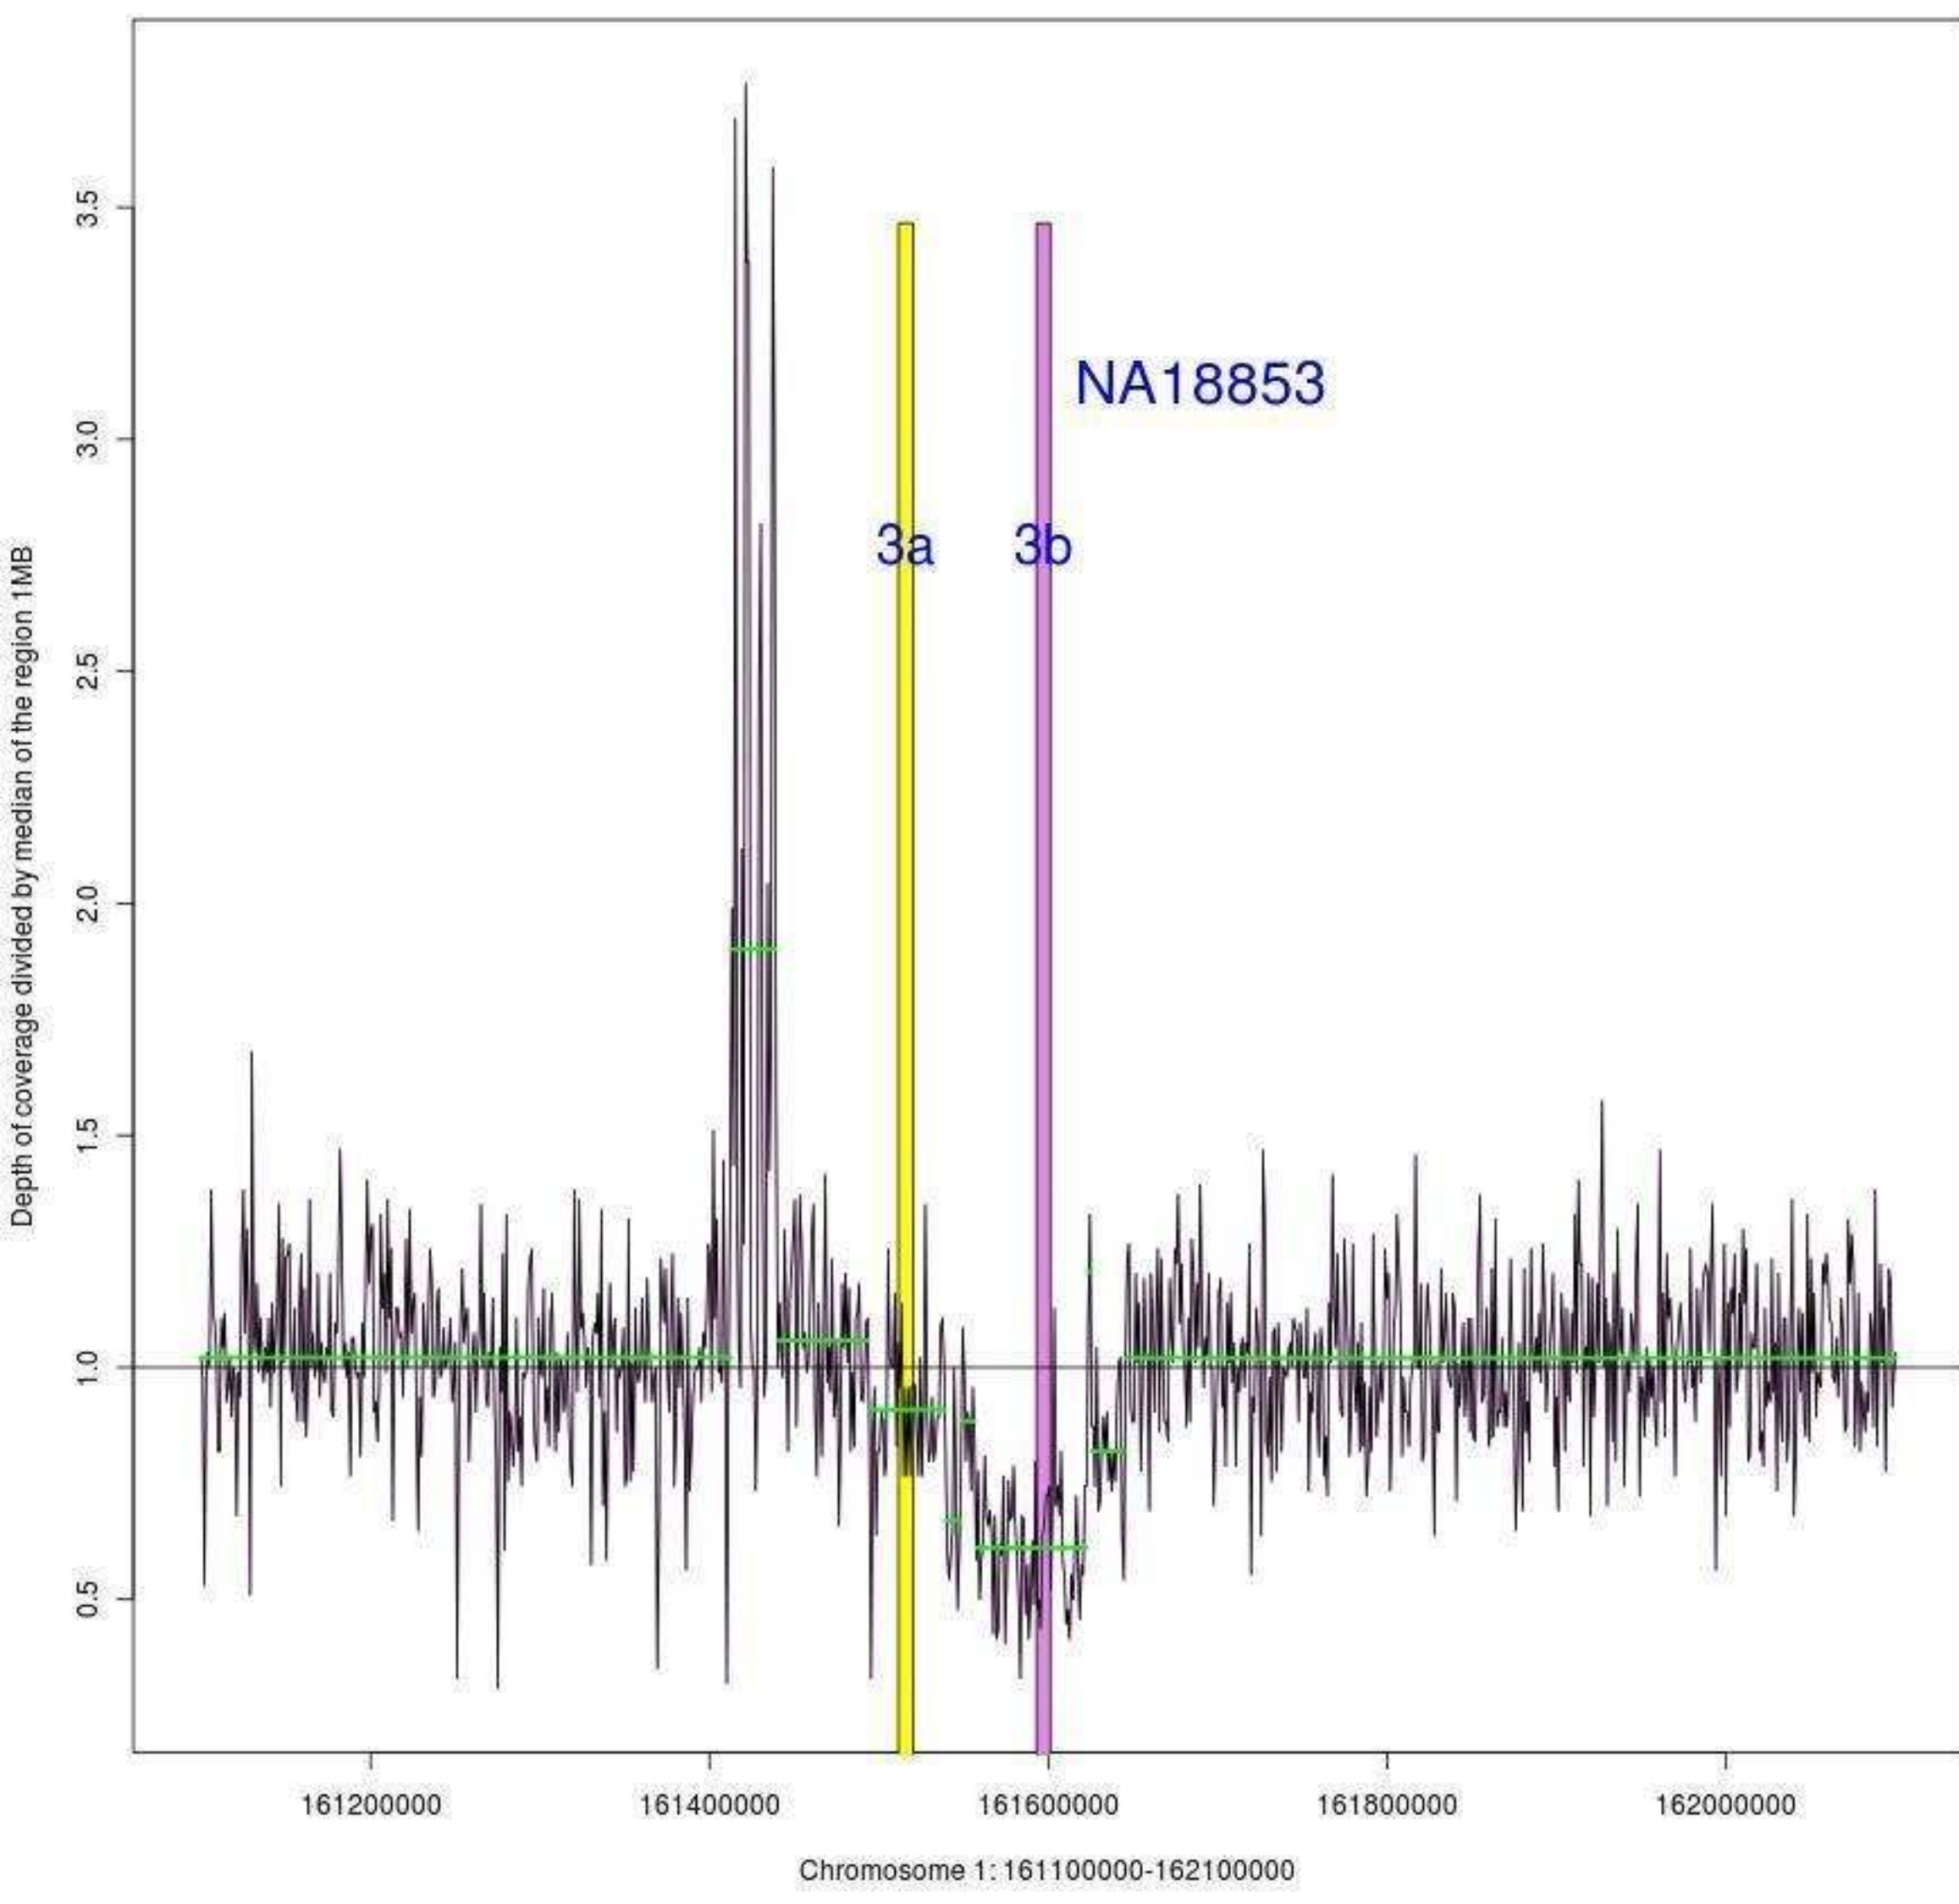

NA18853

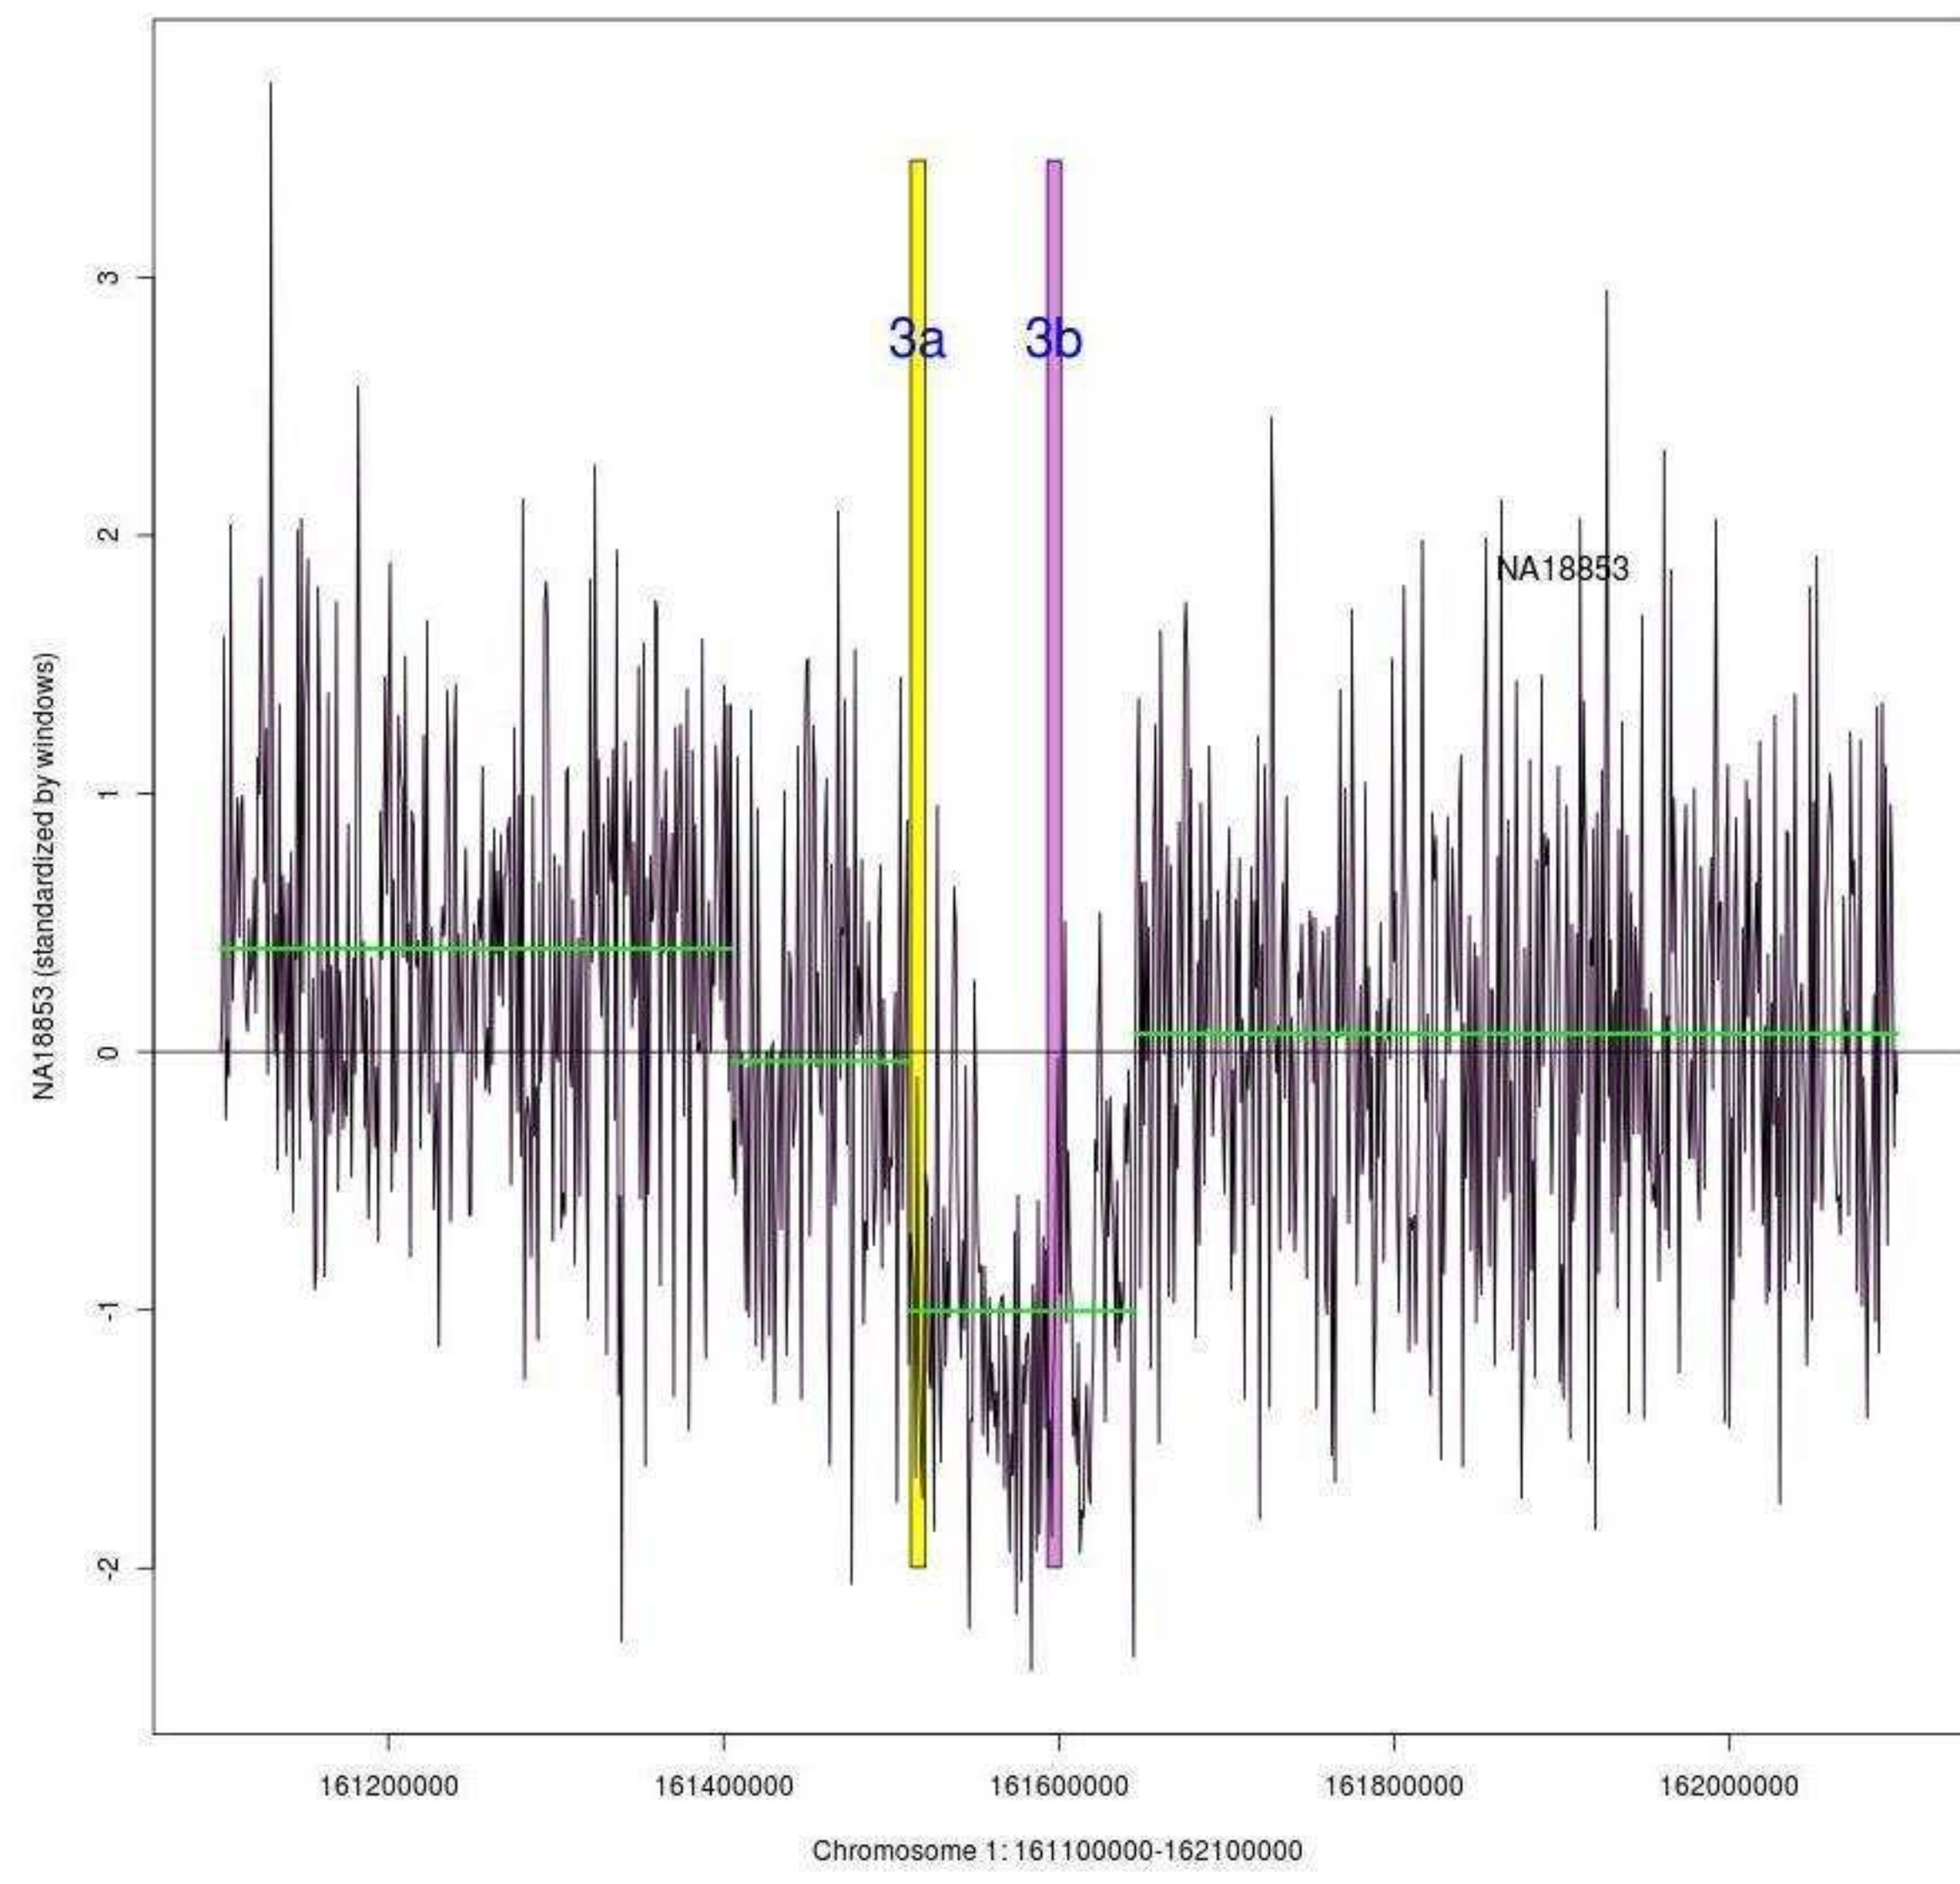

NA18858

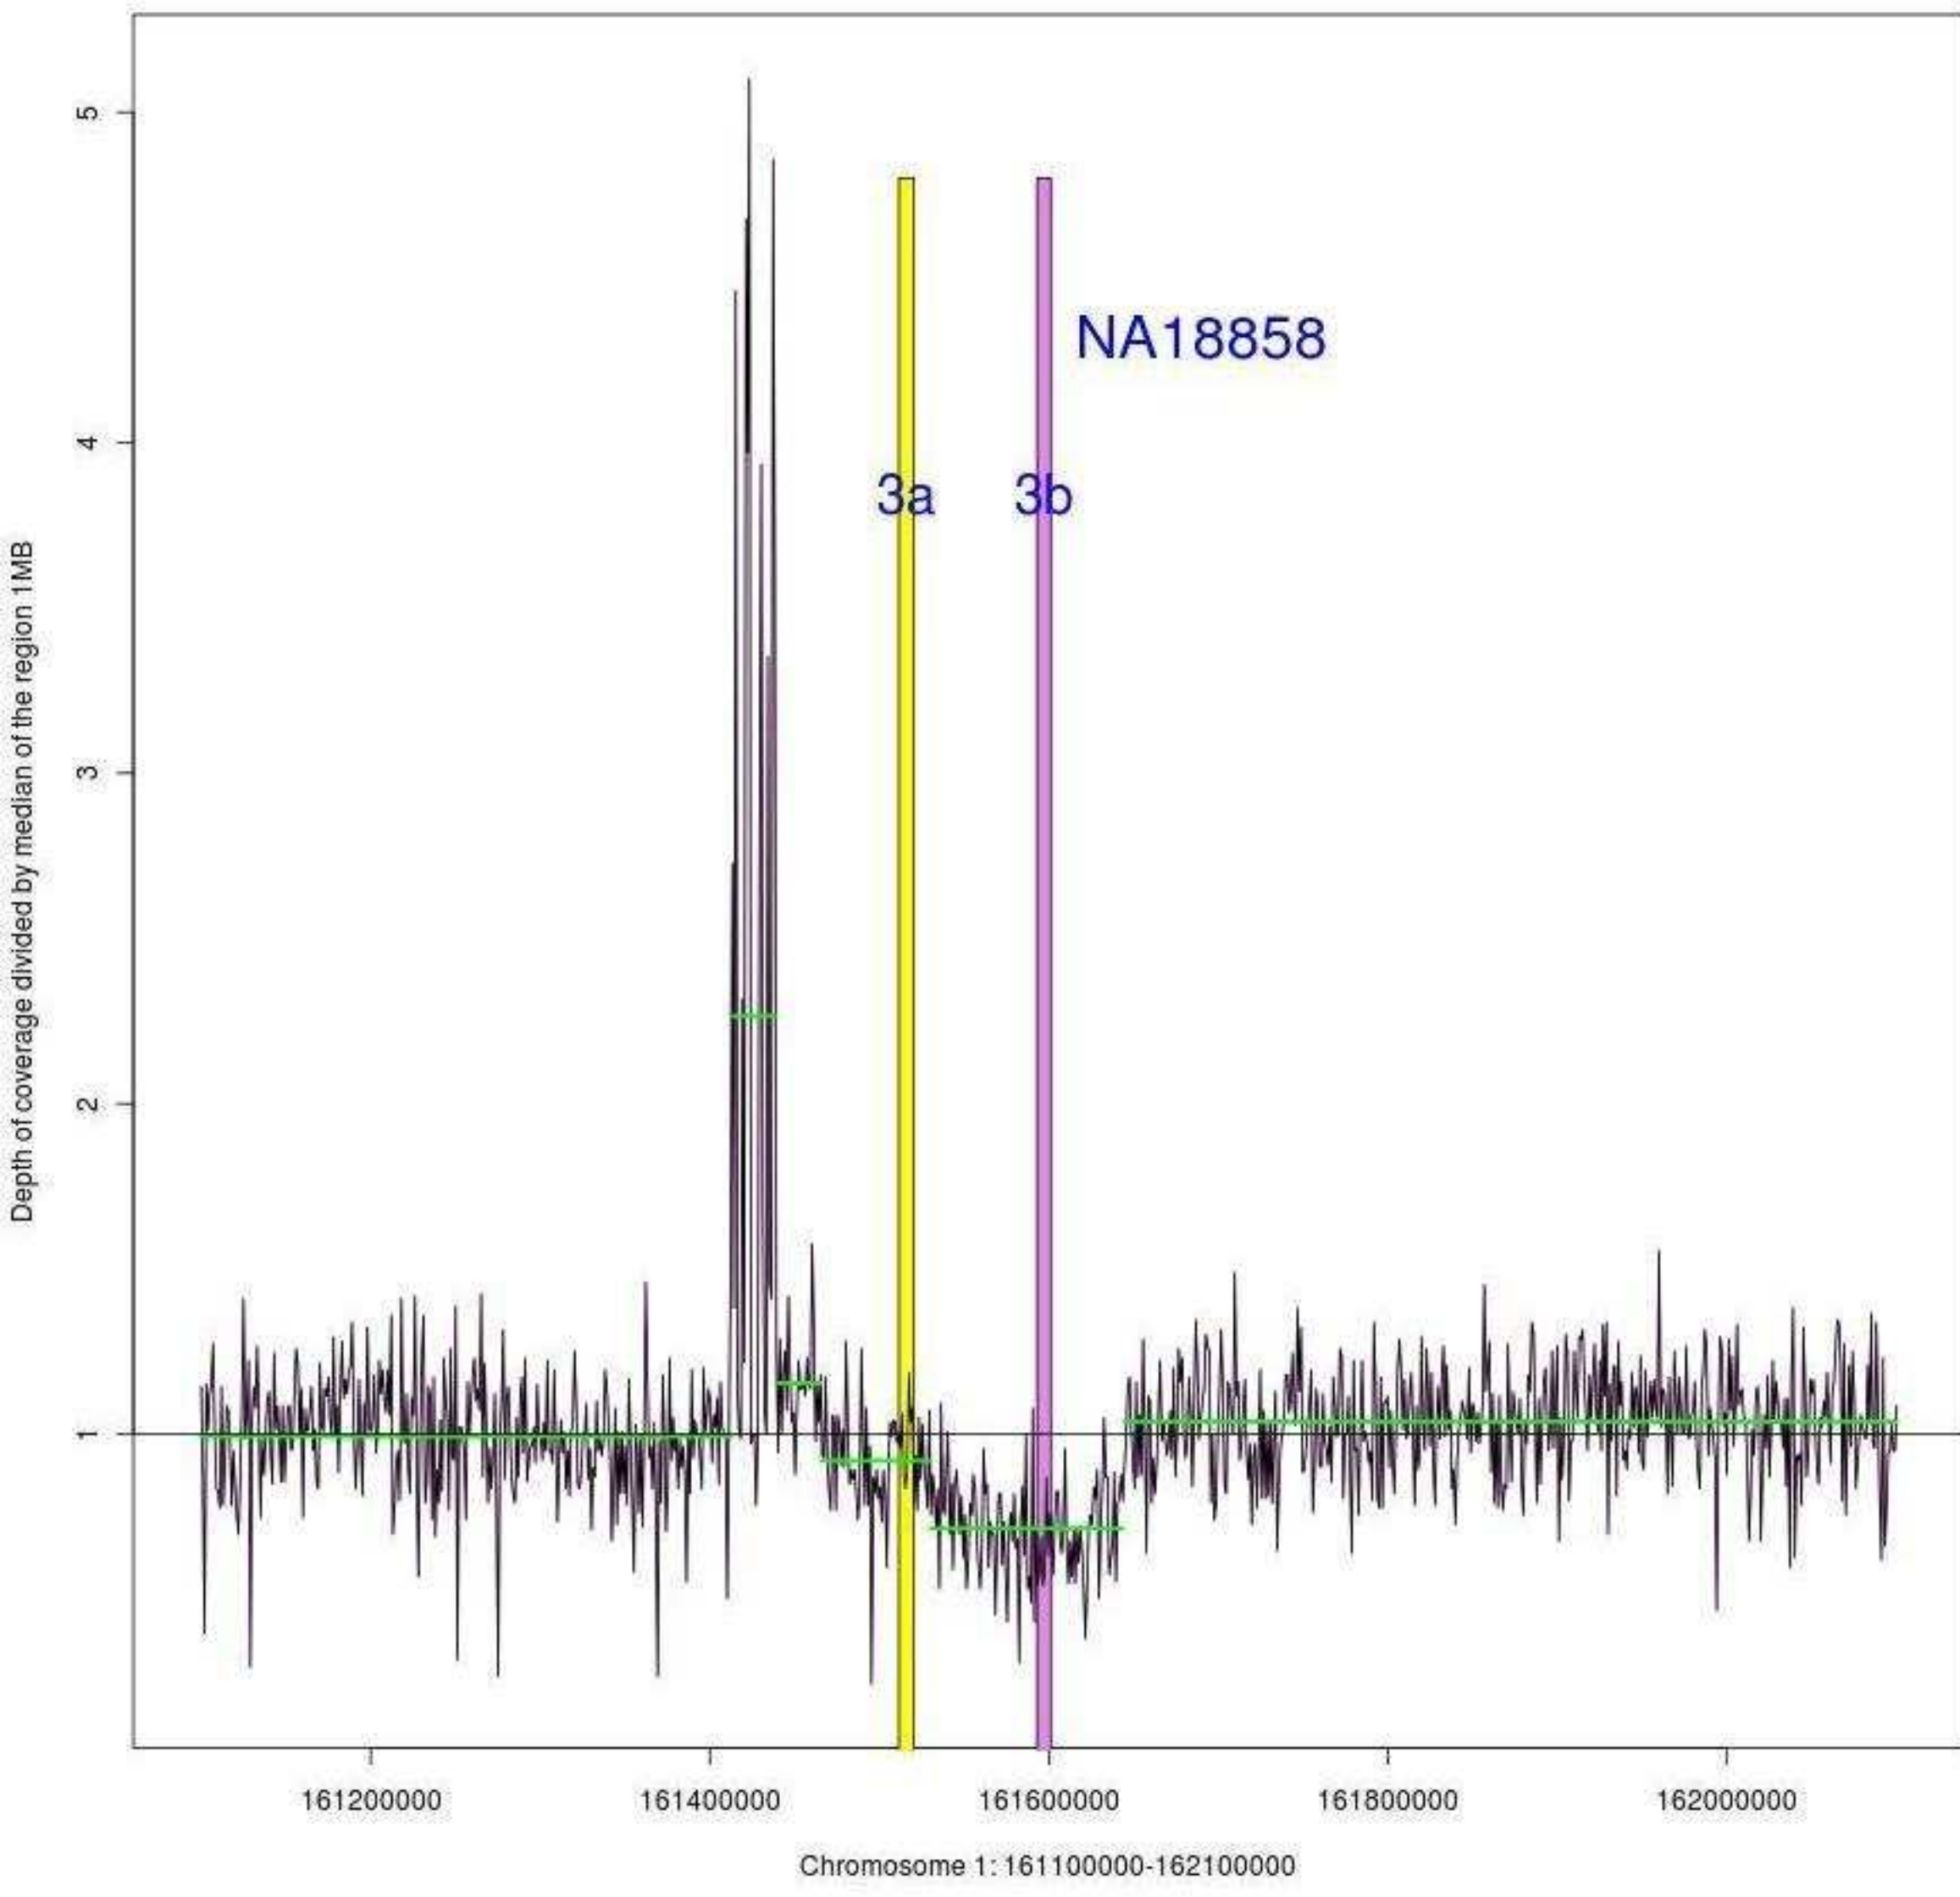

NA18858

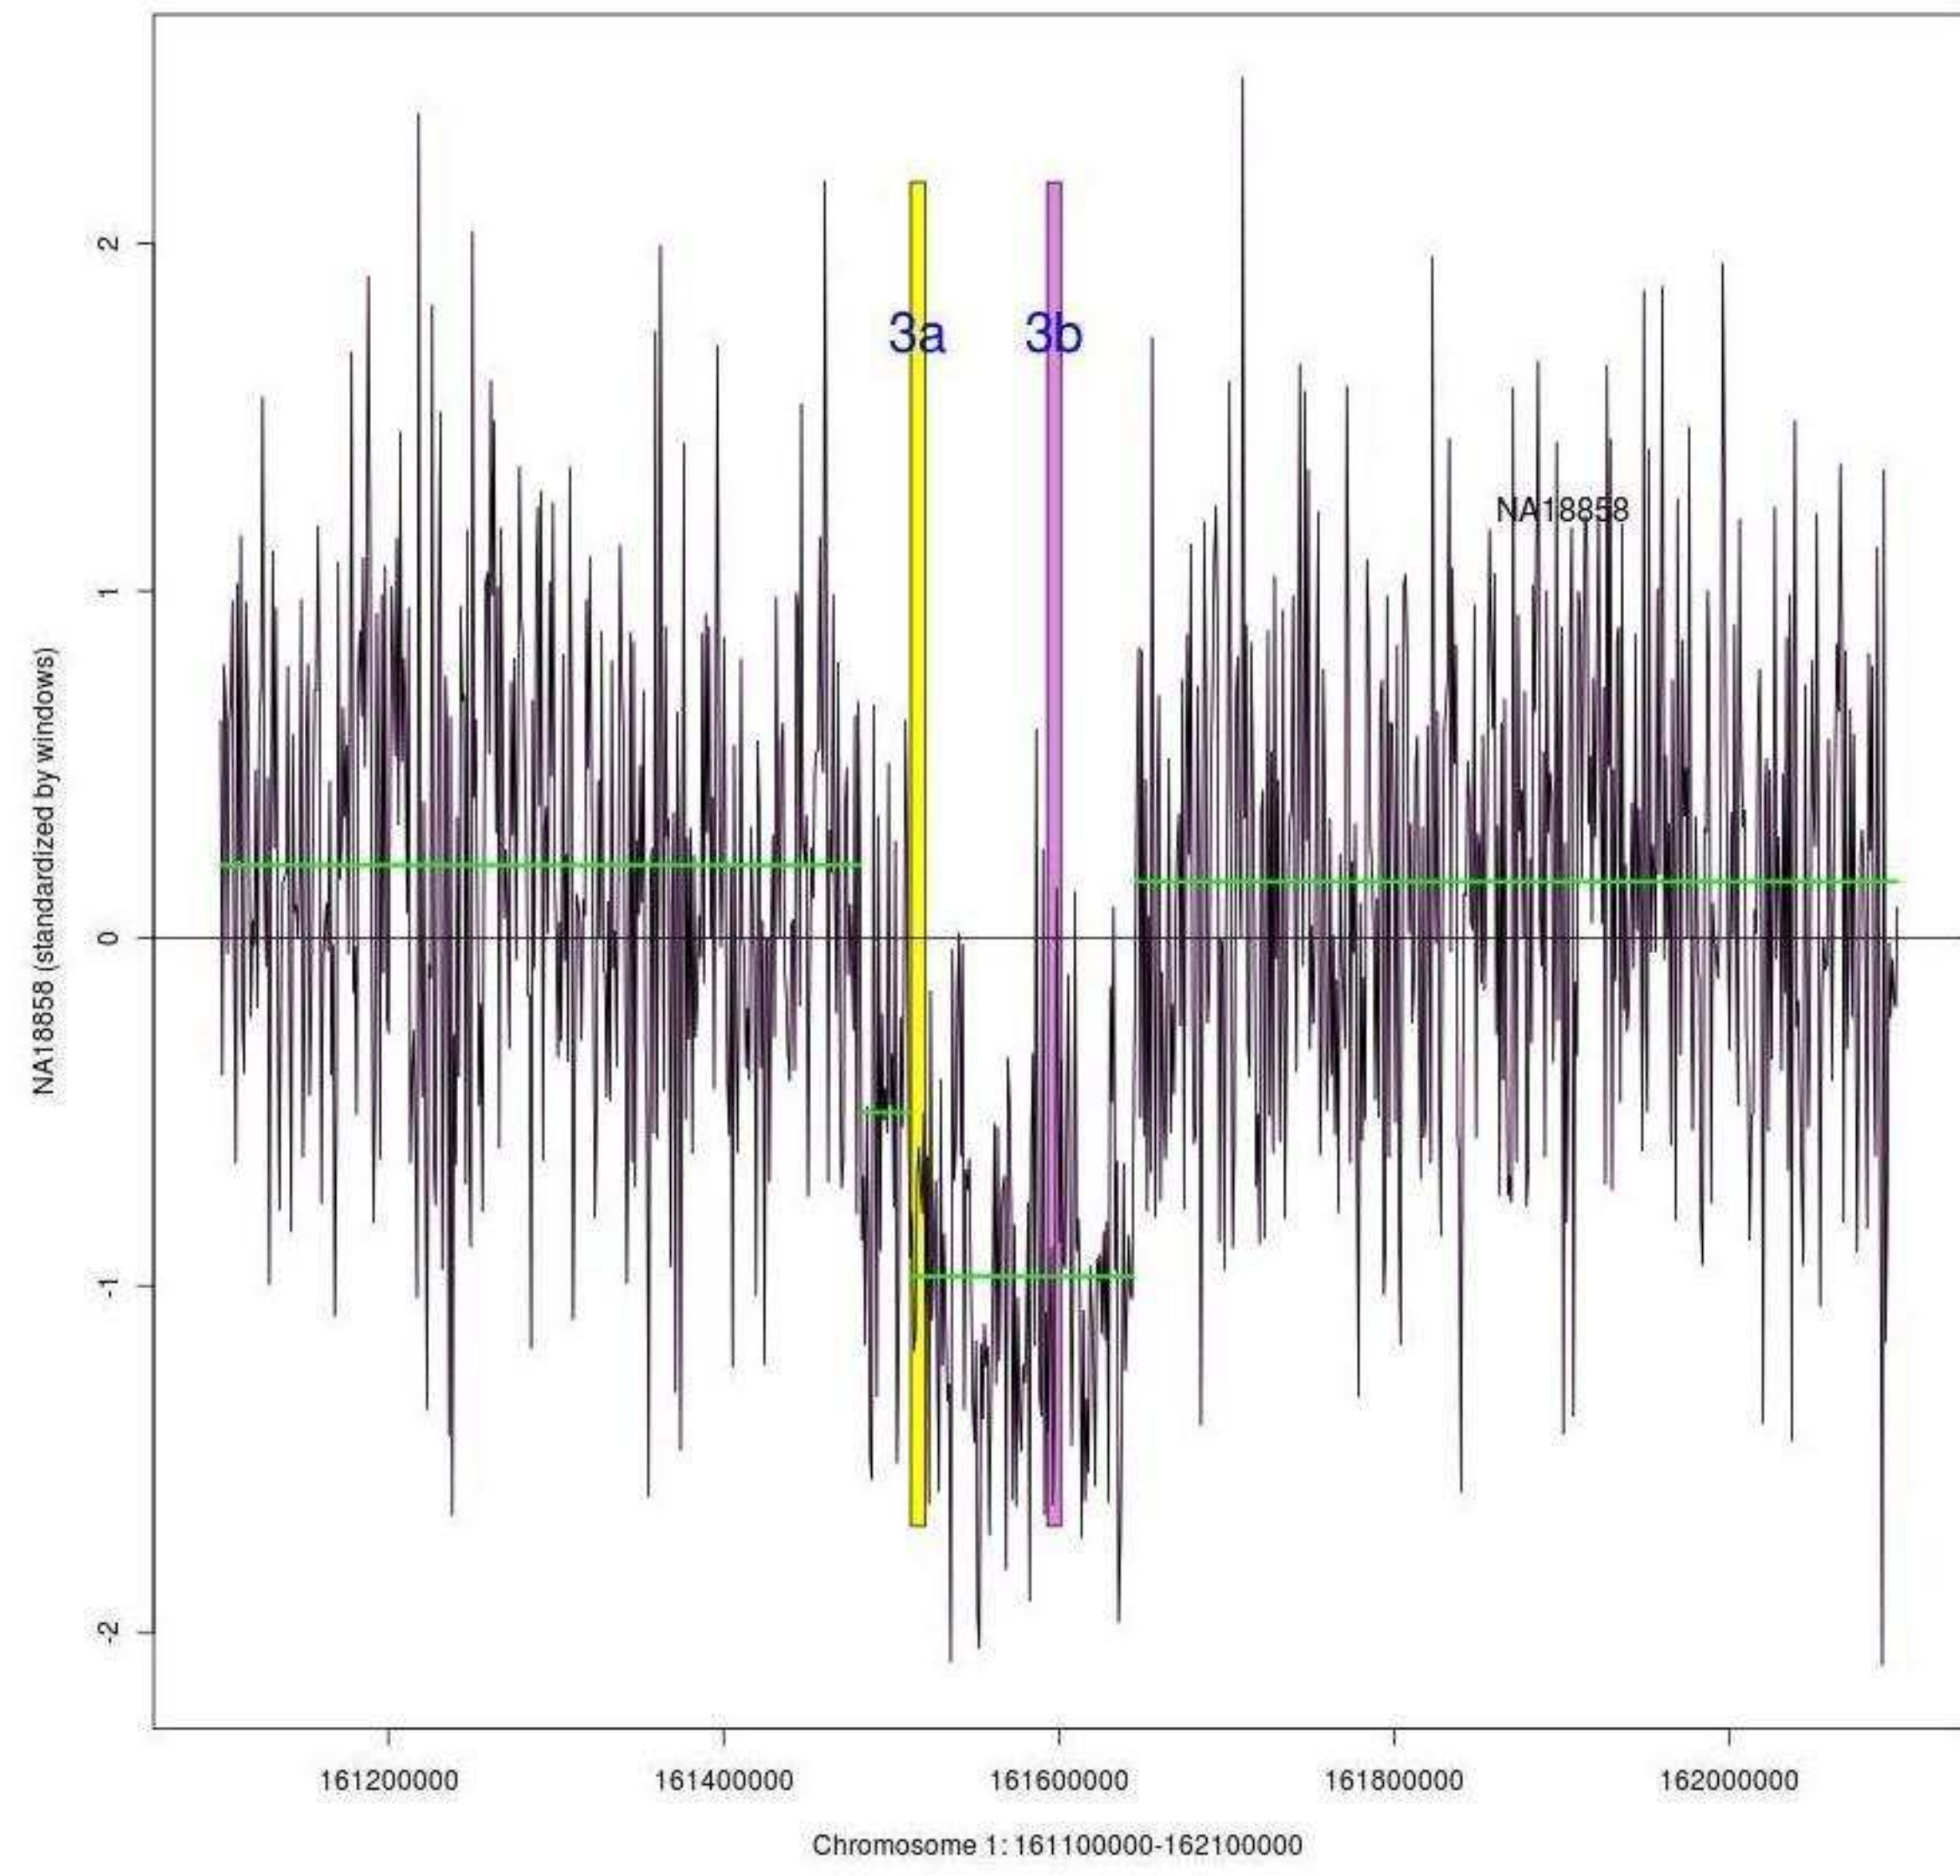

NA18861

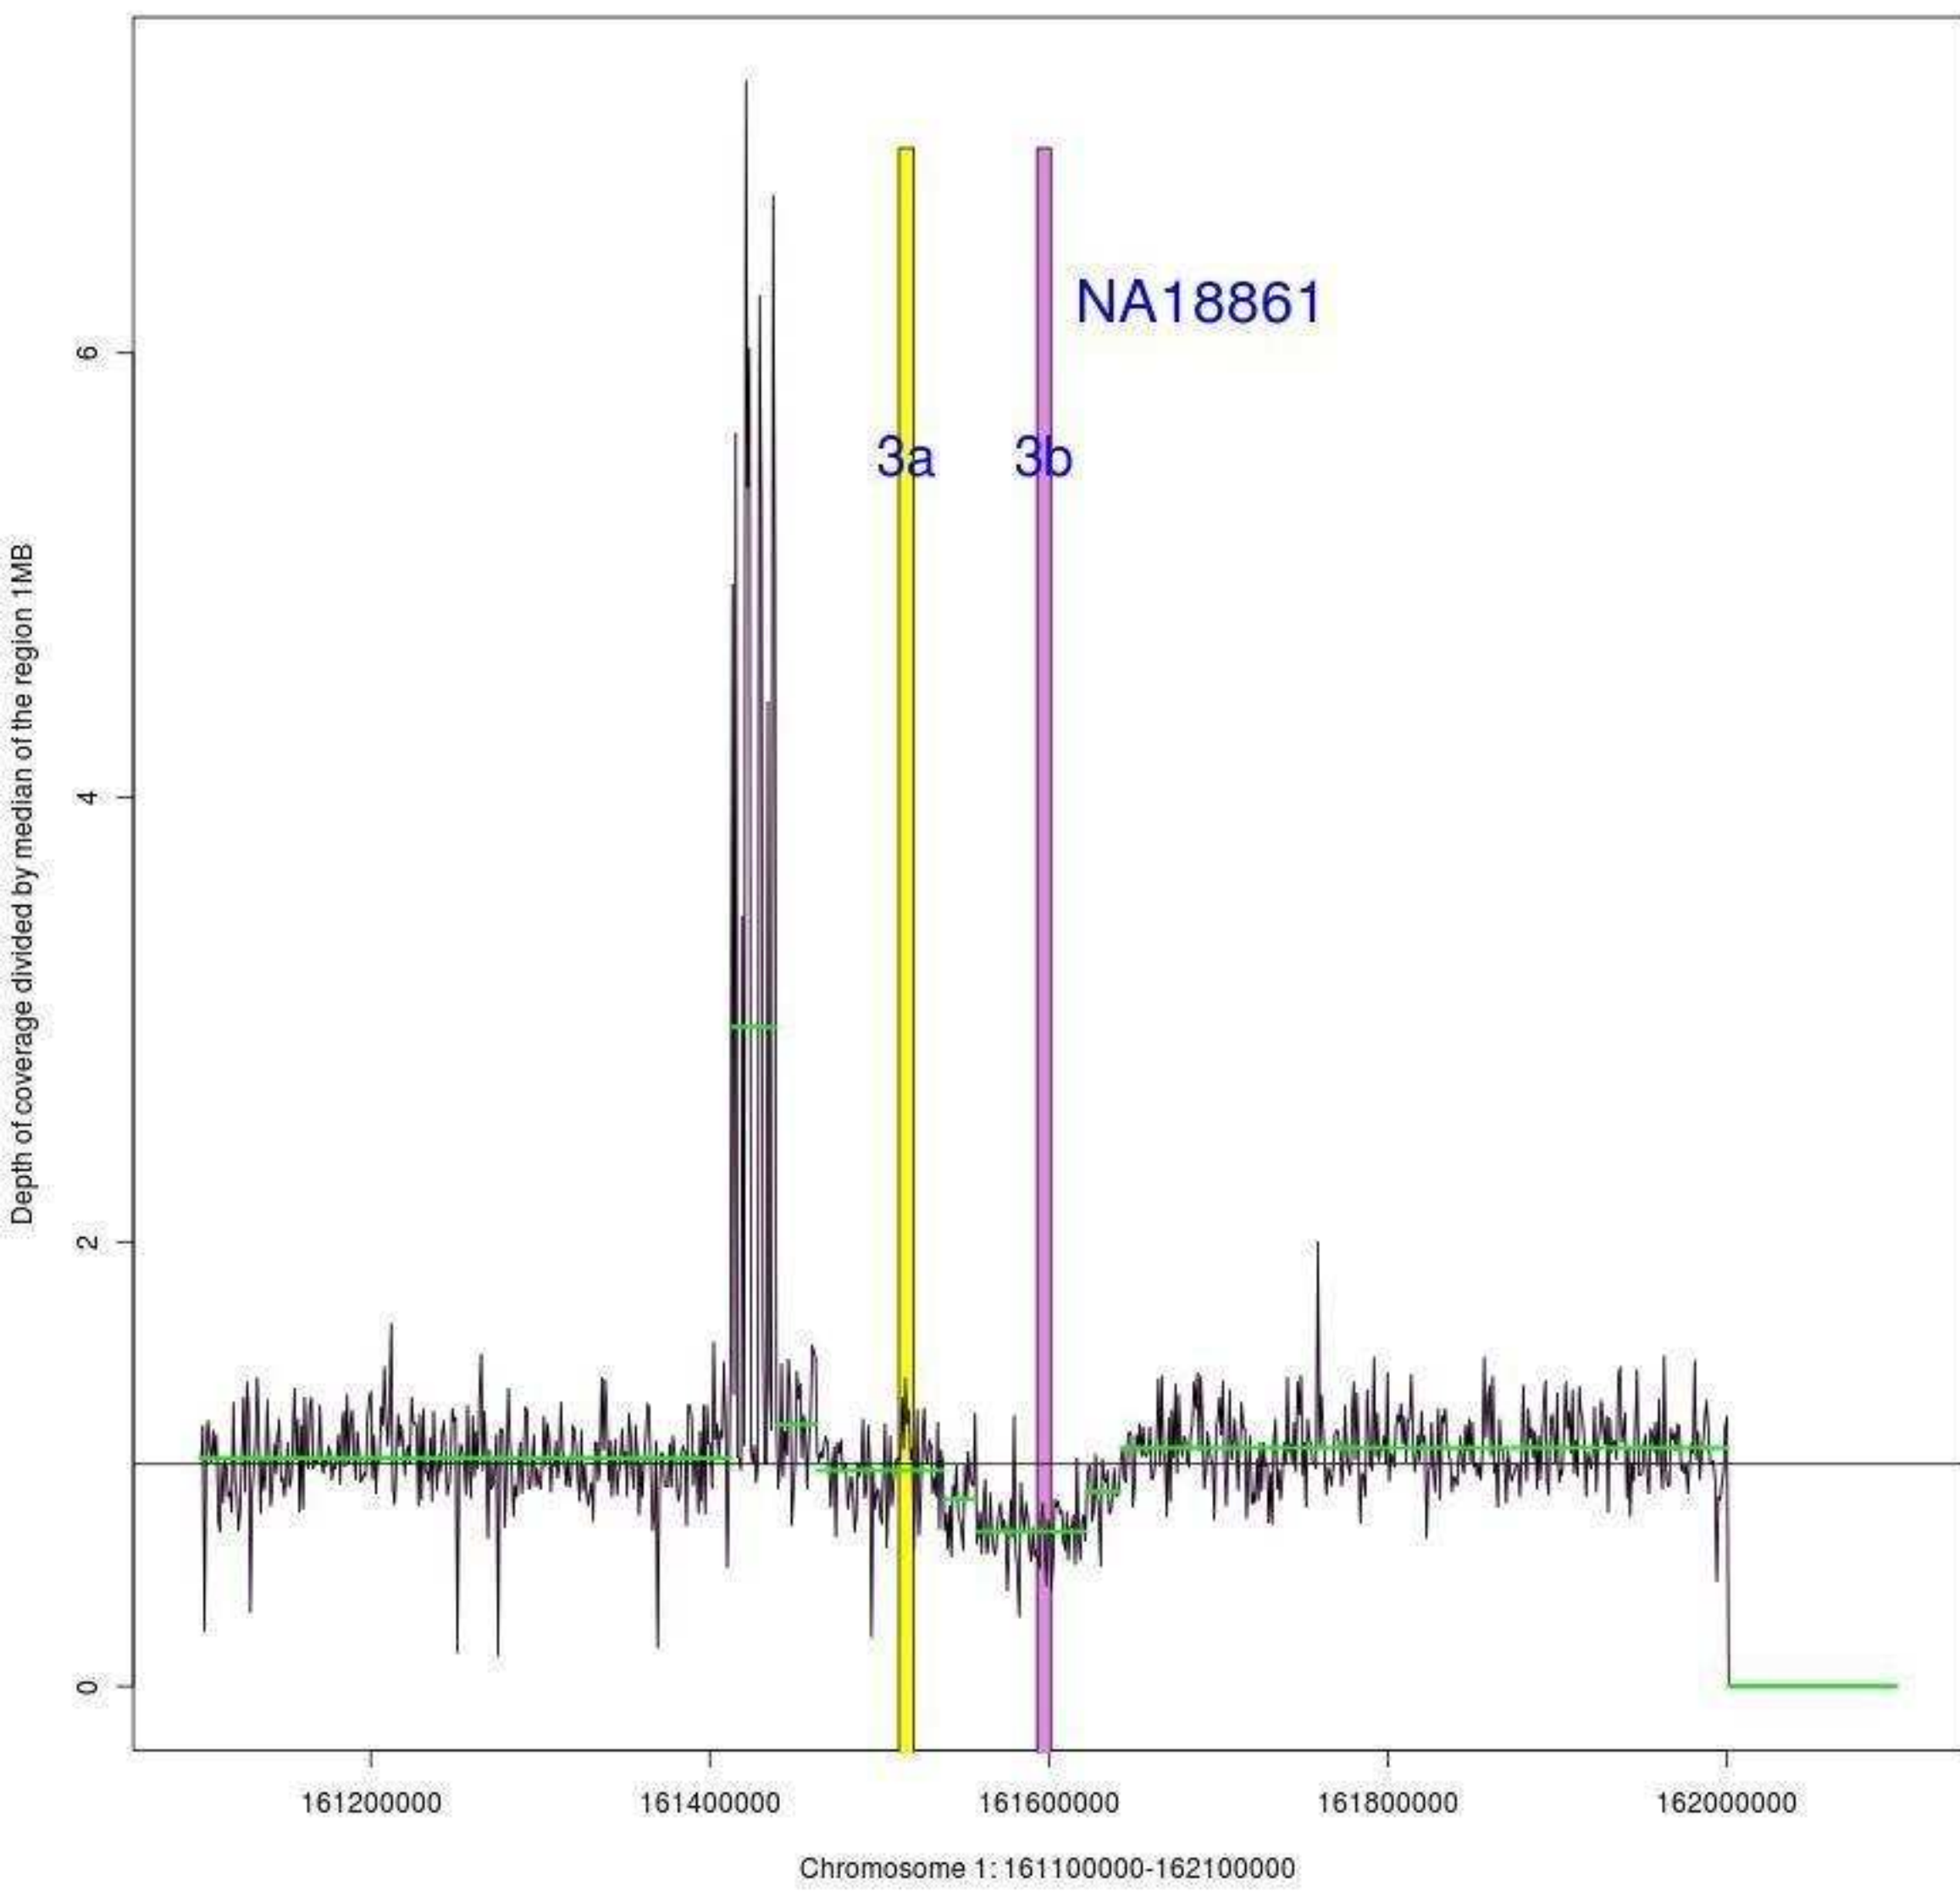

NA18861

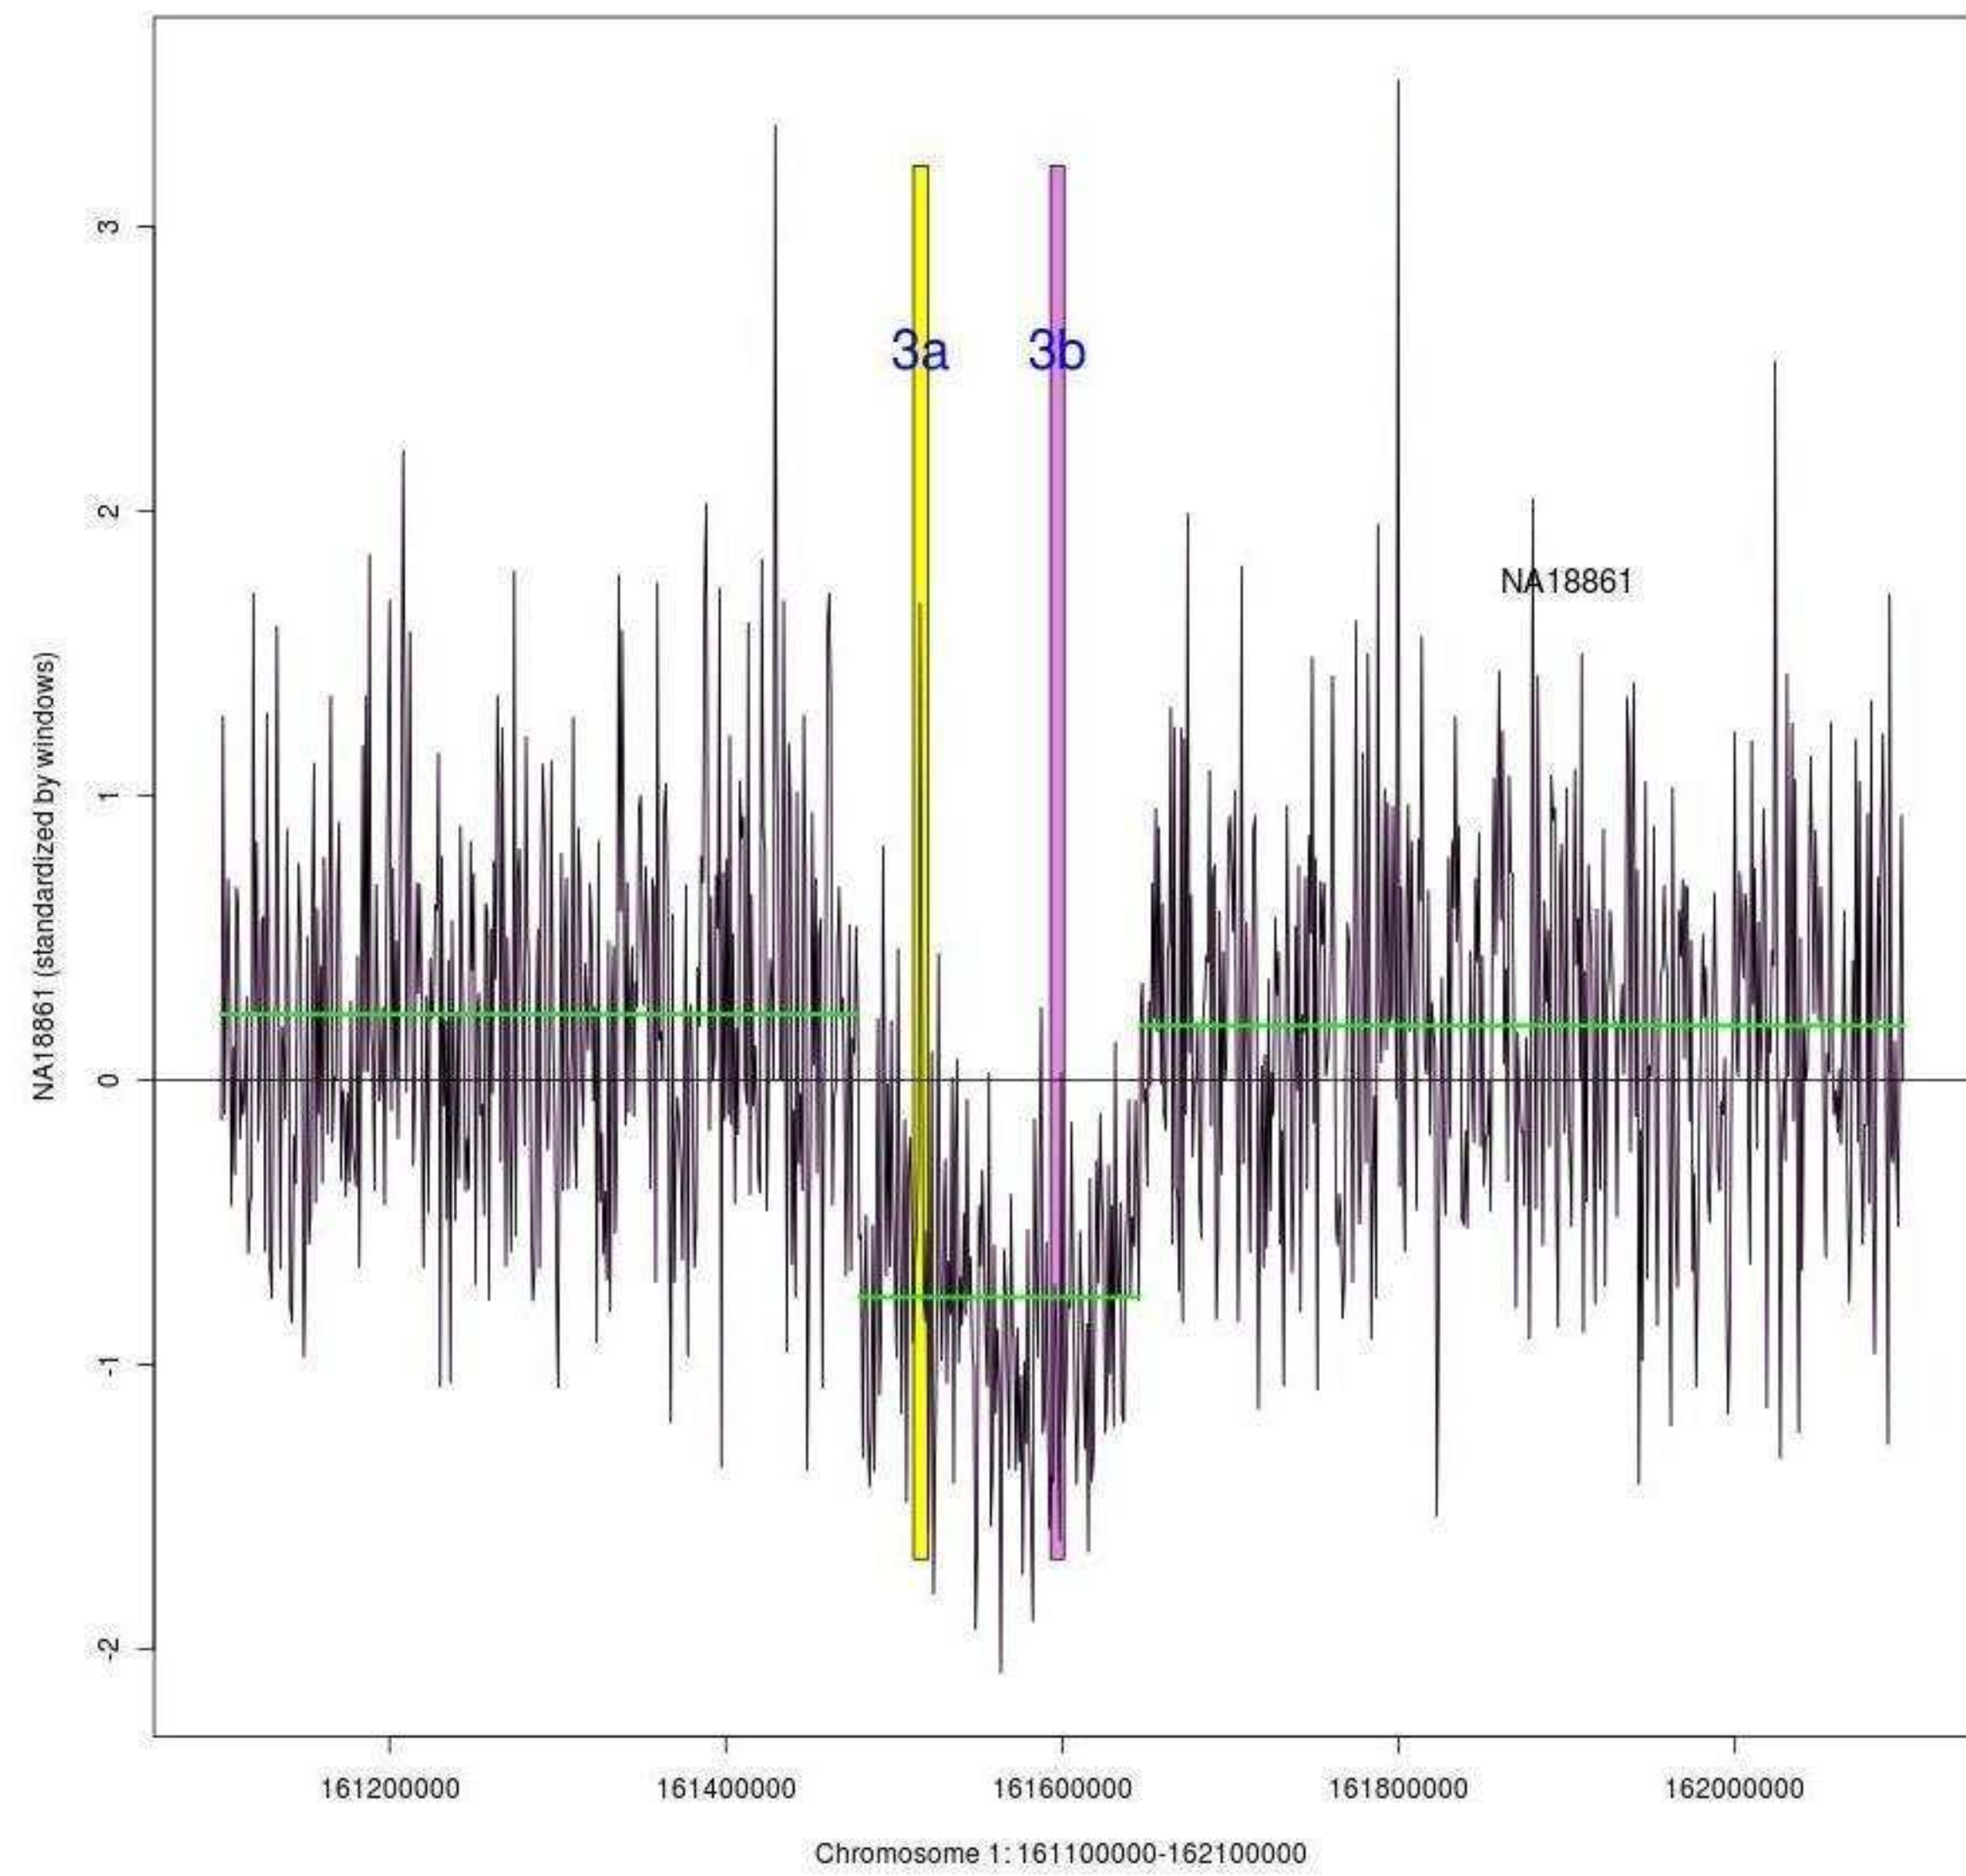



NA18870

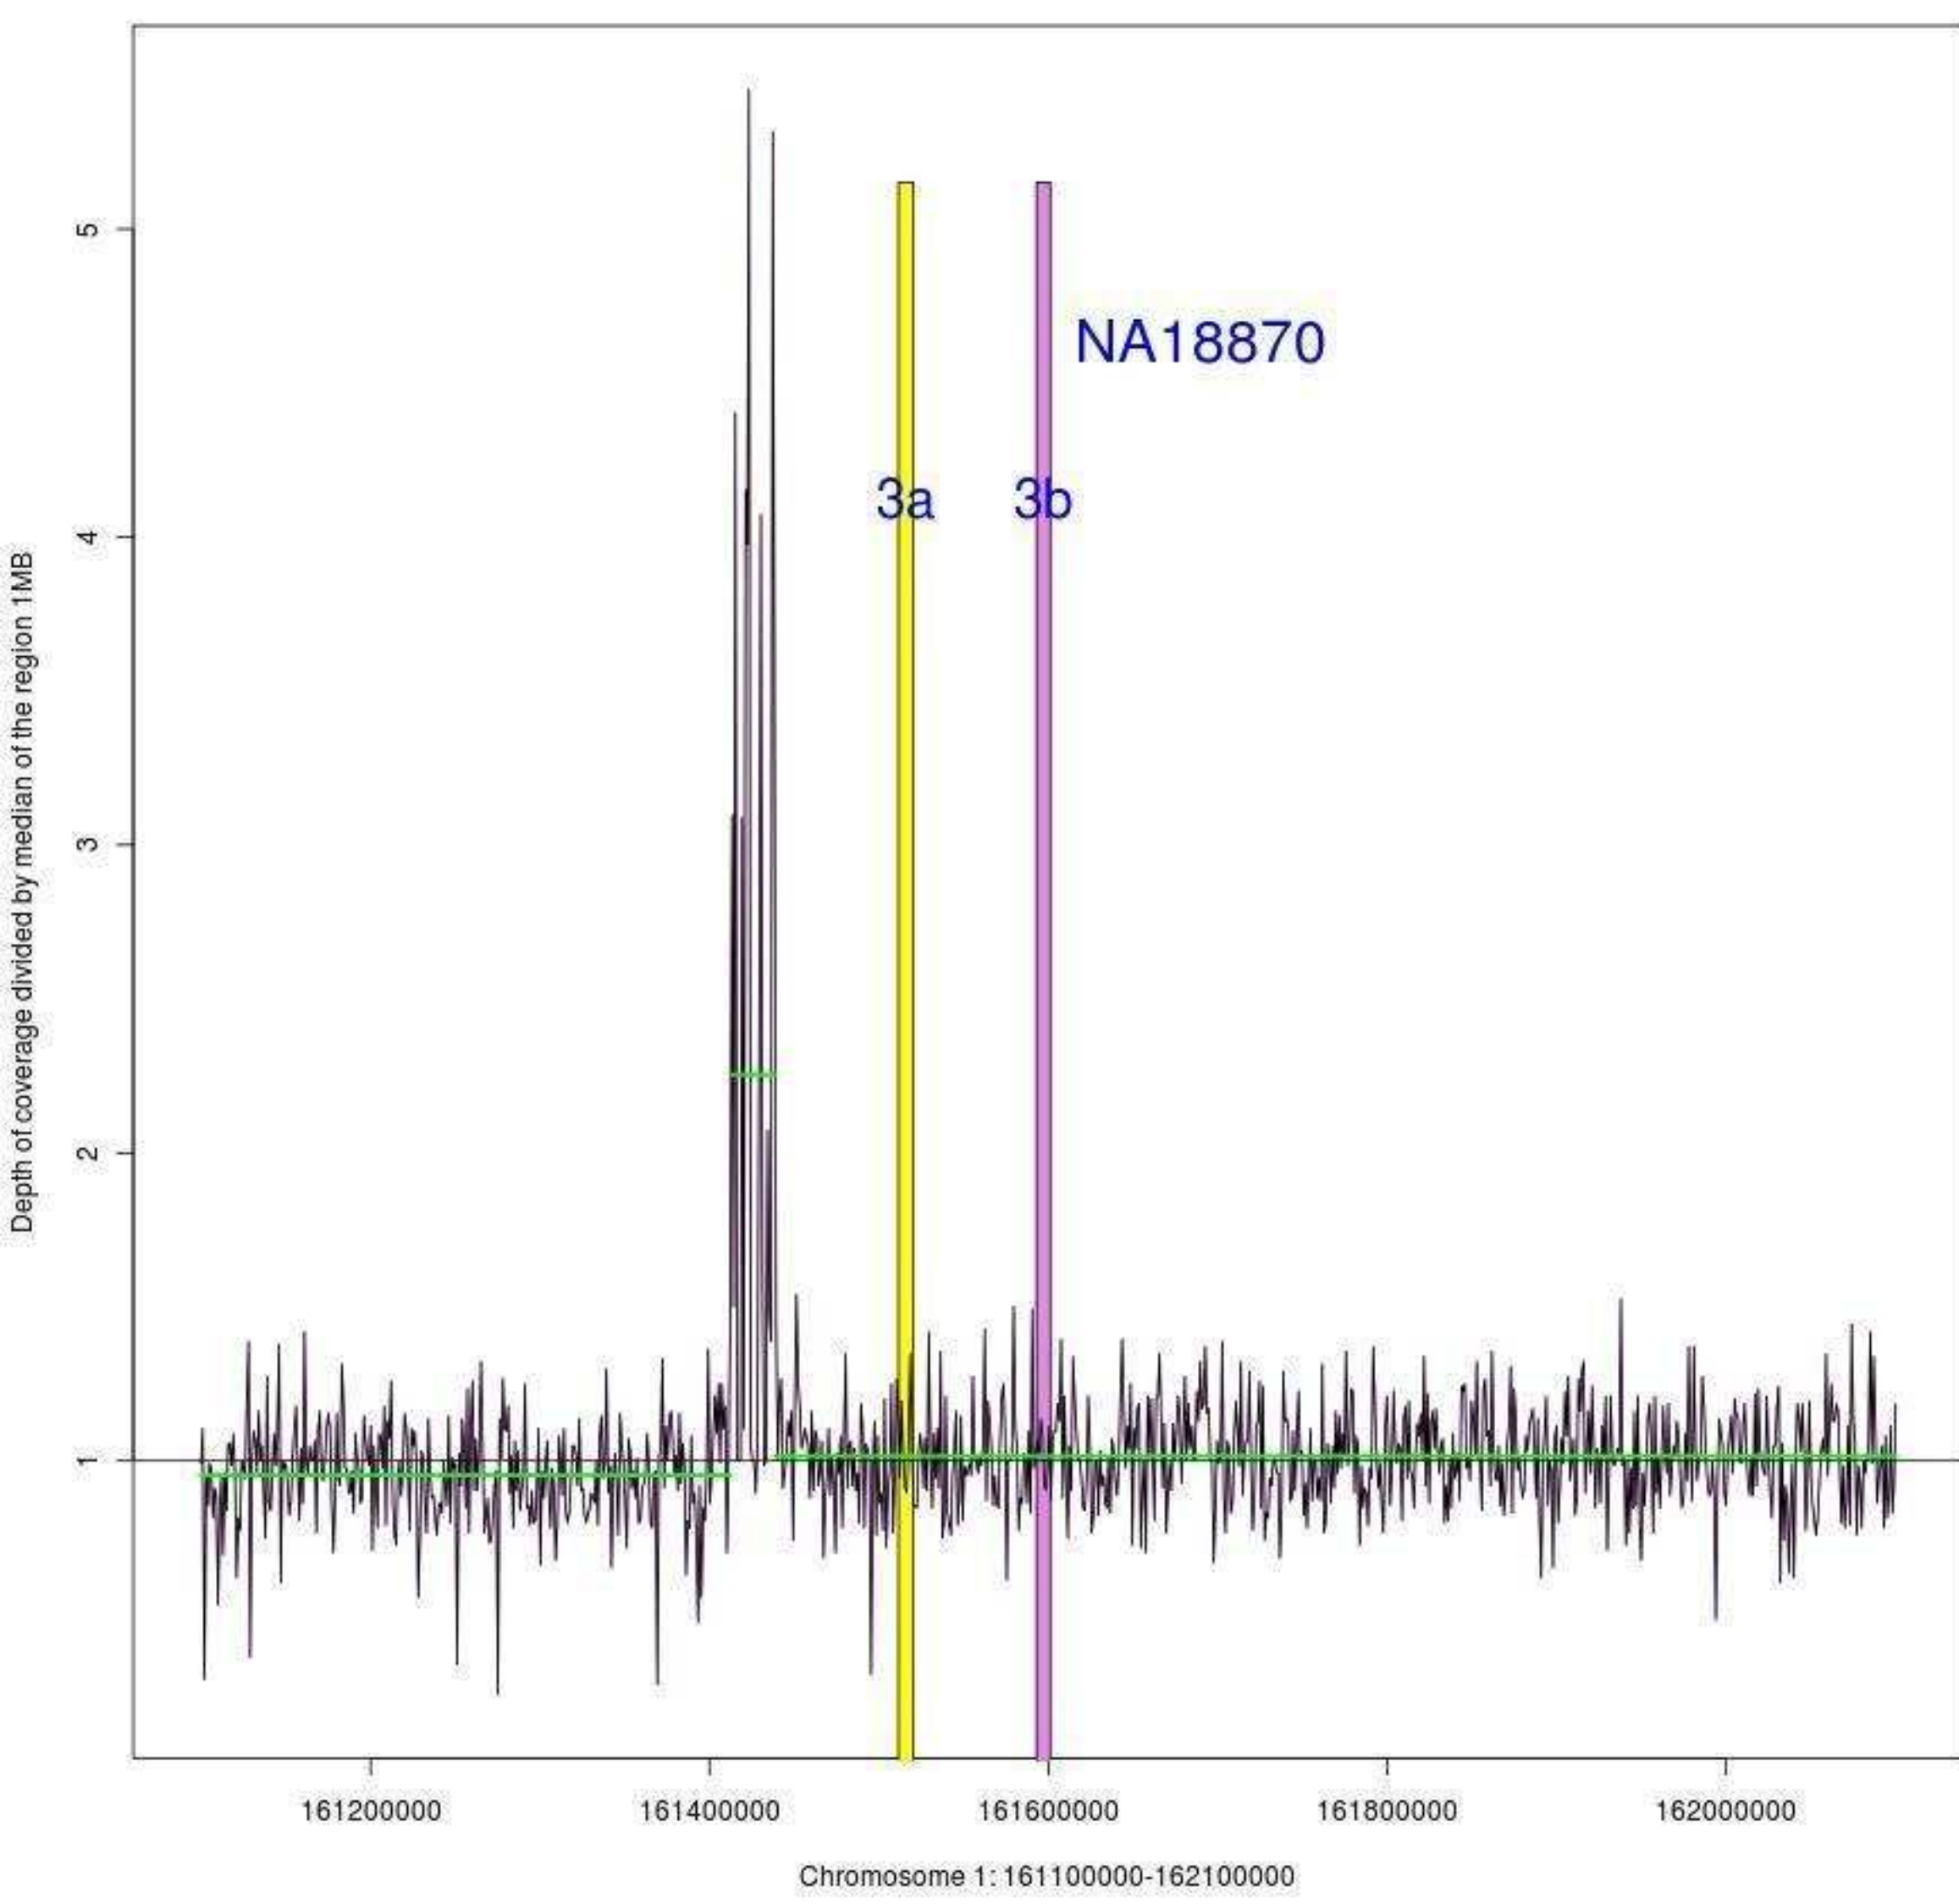

NA18870

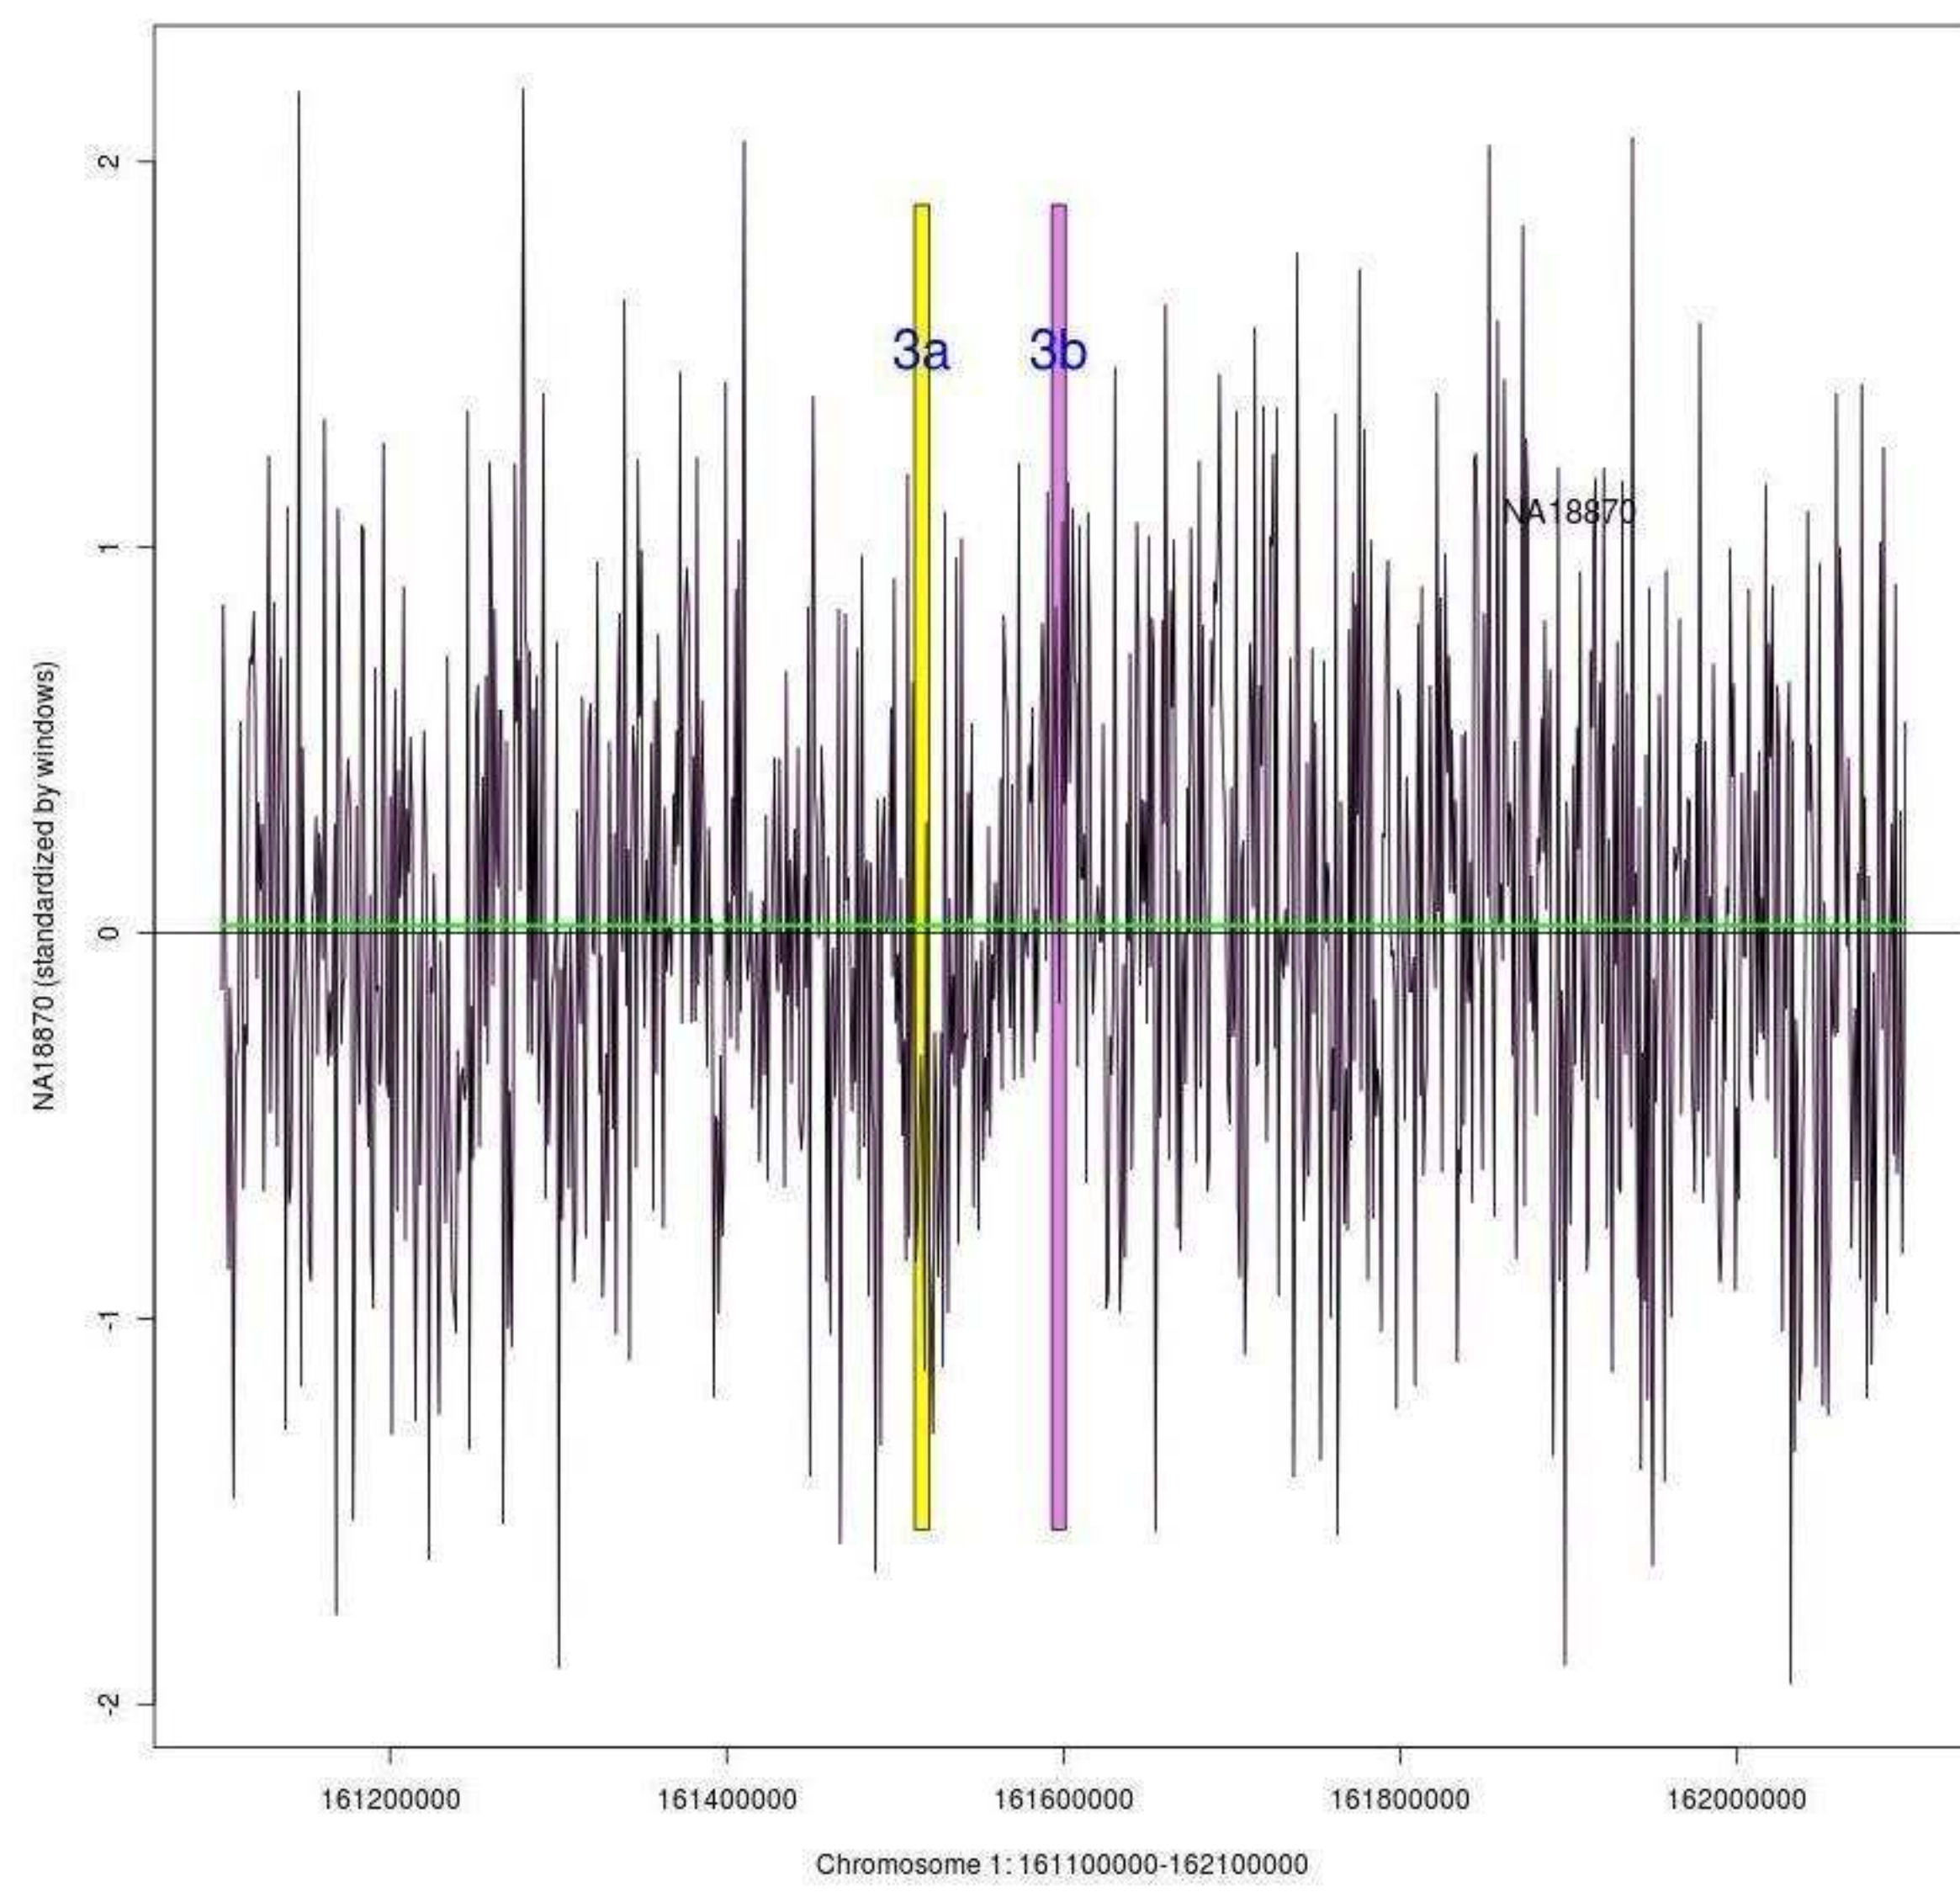

NA18912

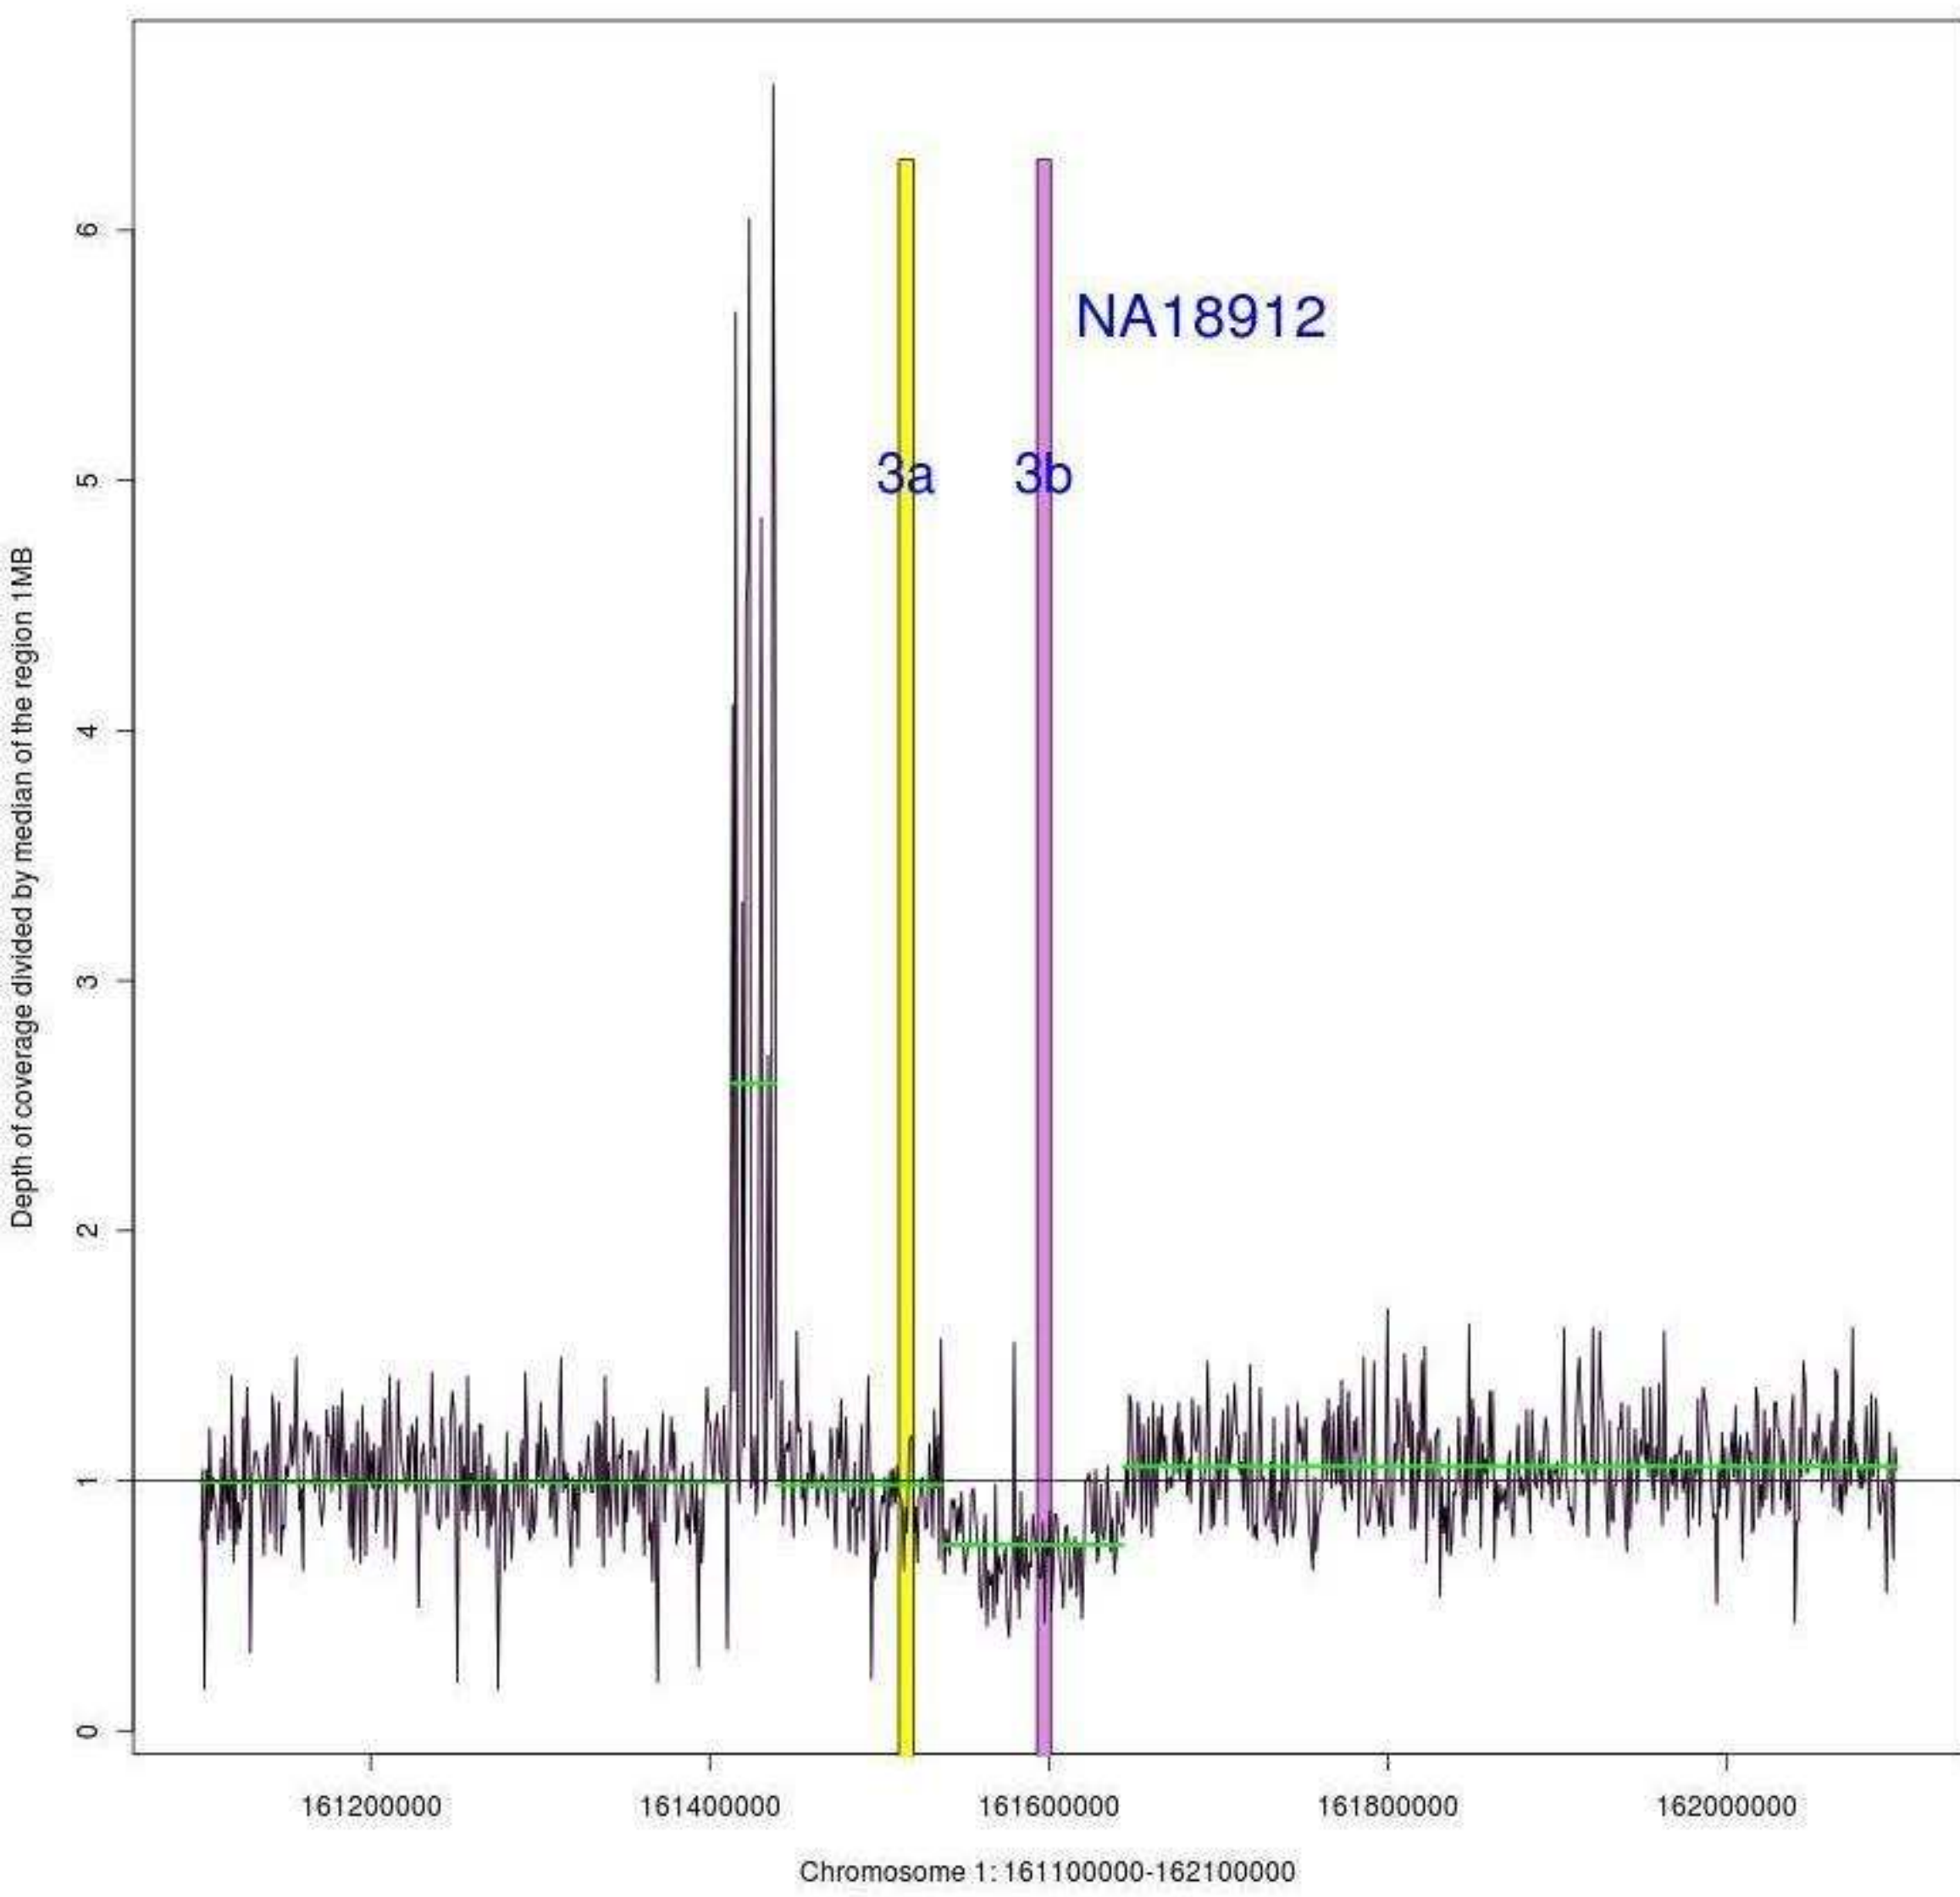

NA18912

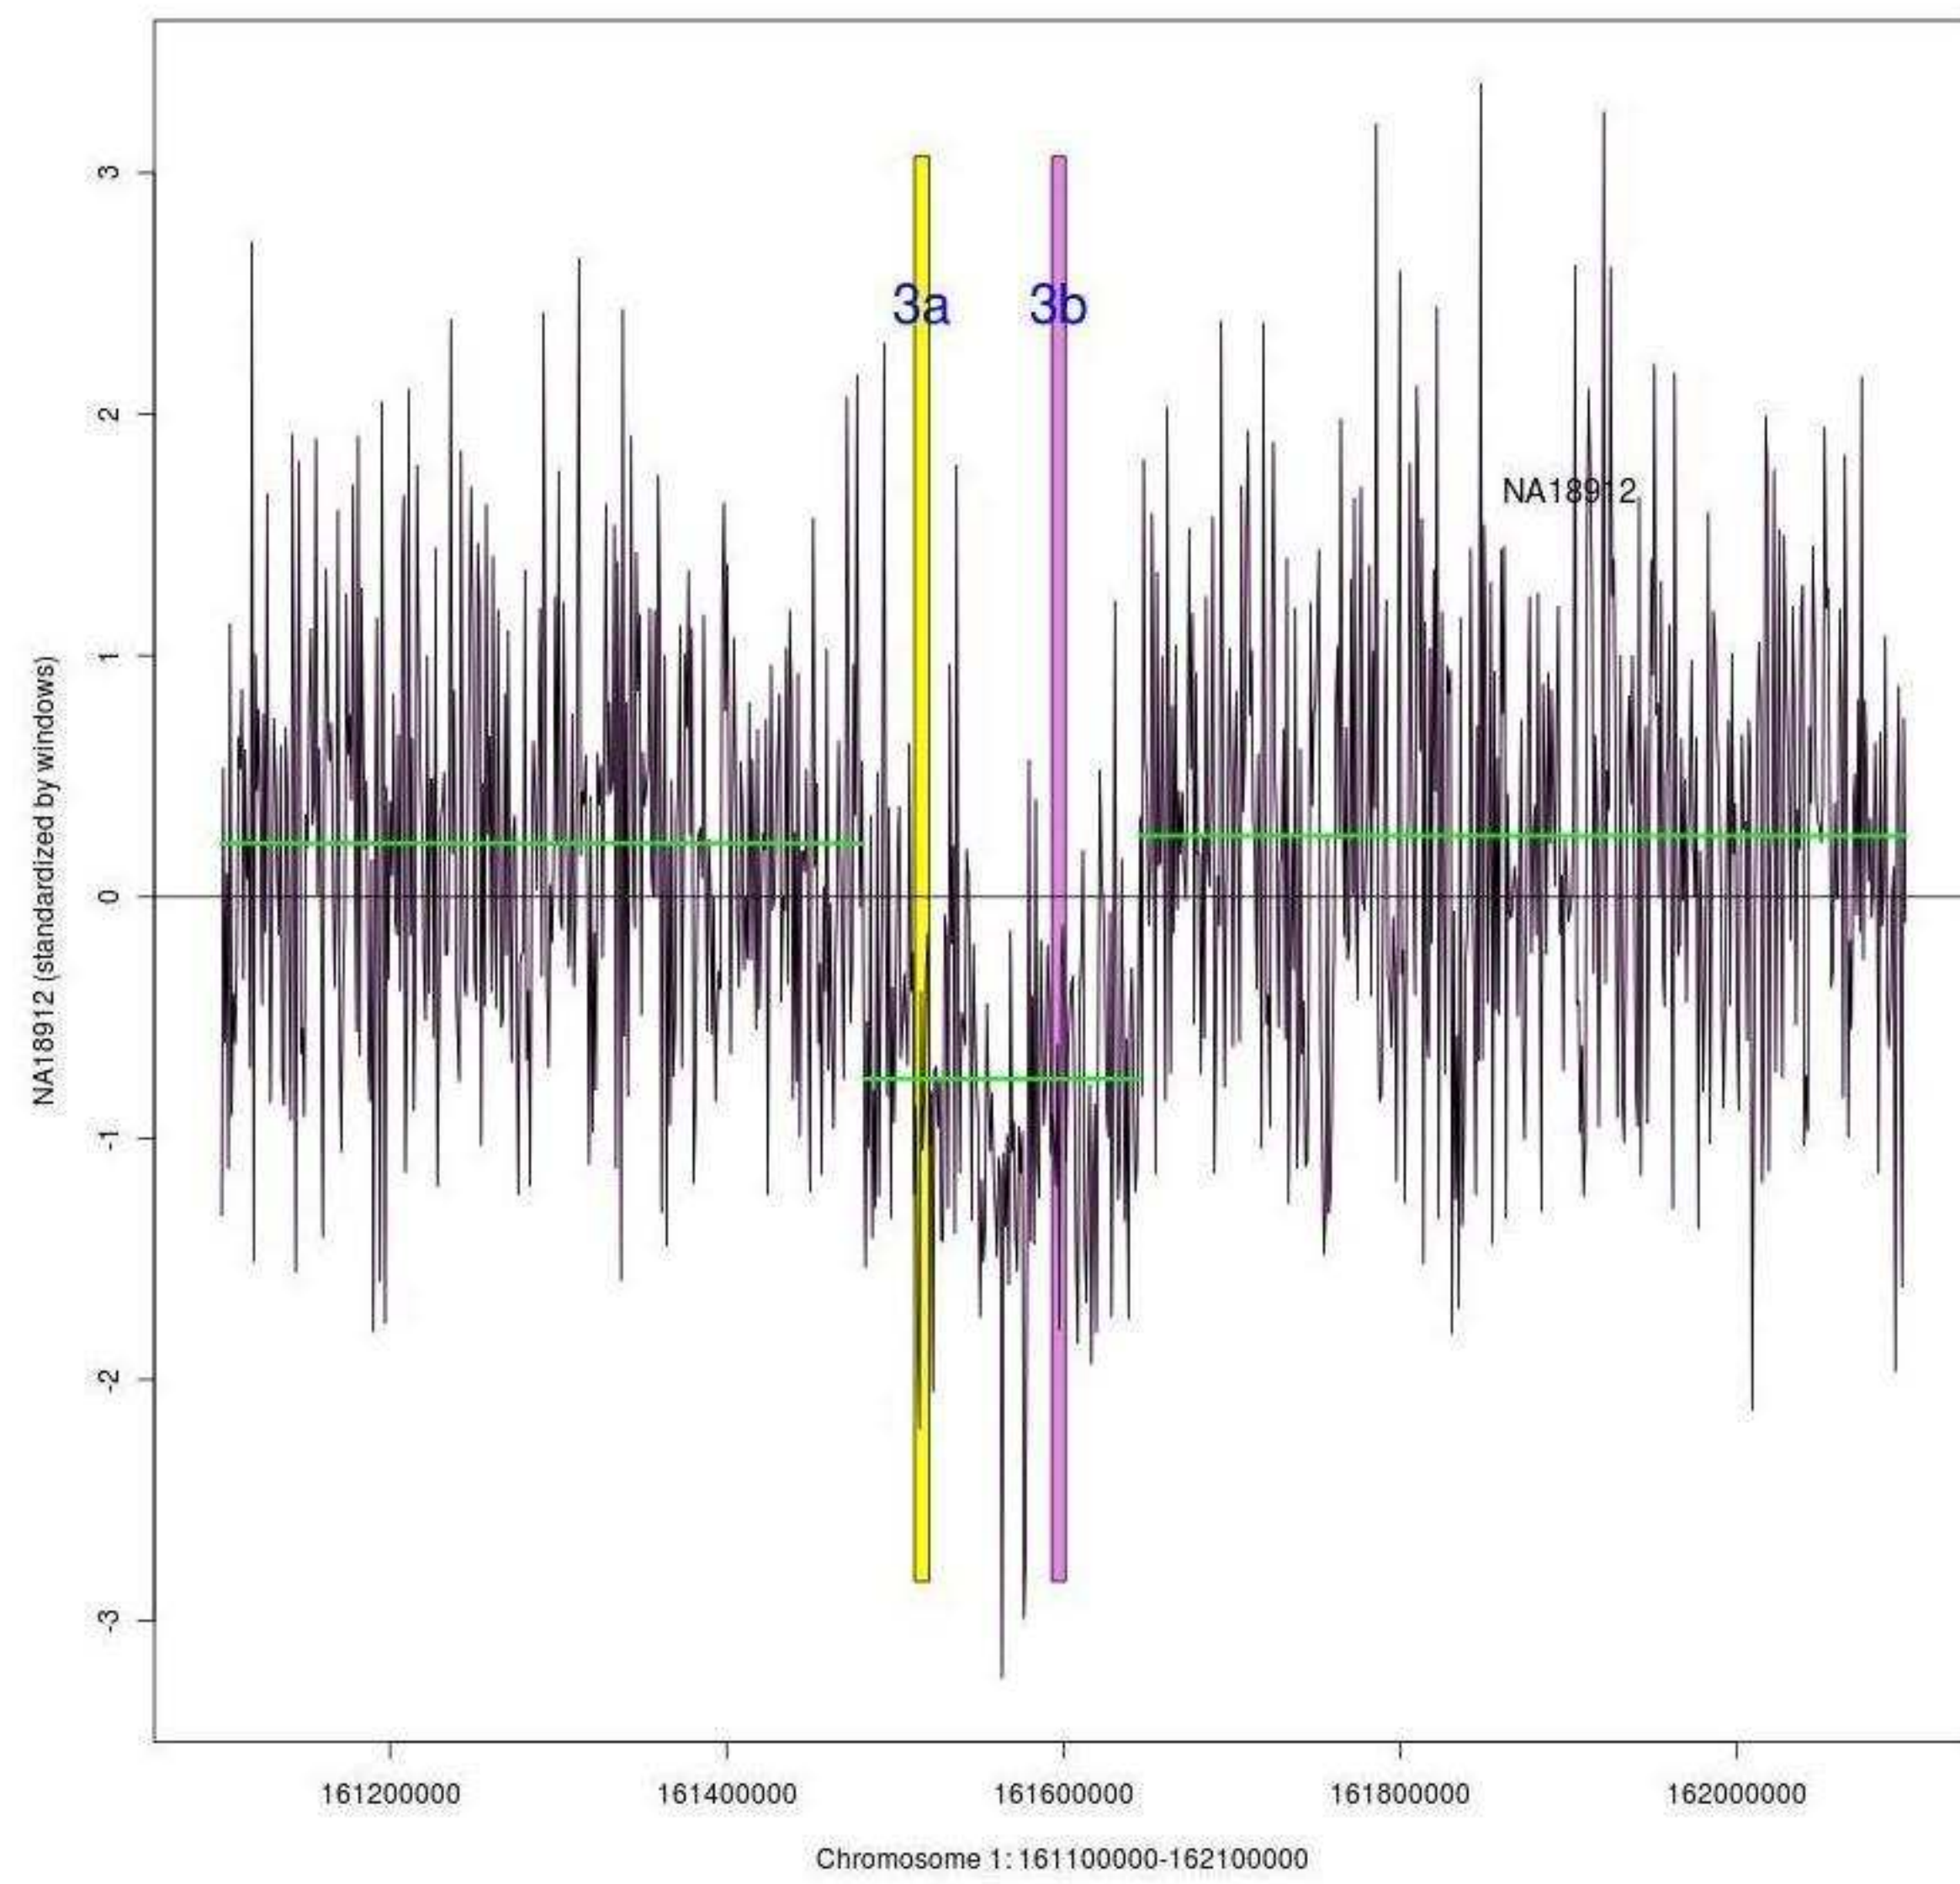

NA18940

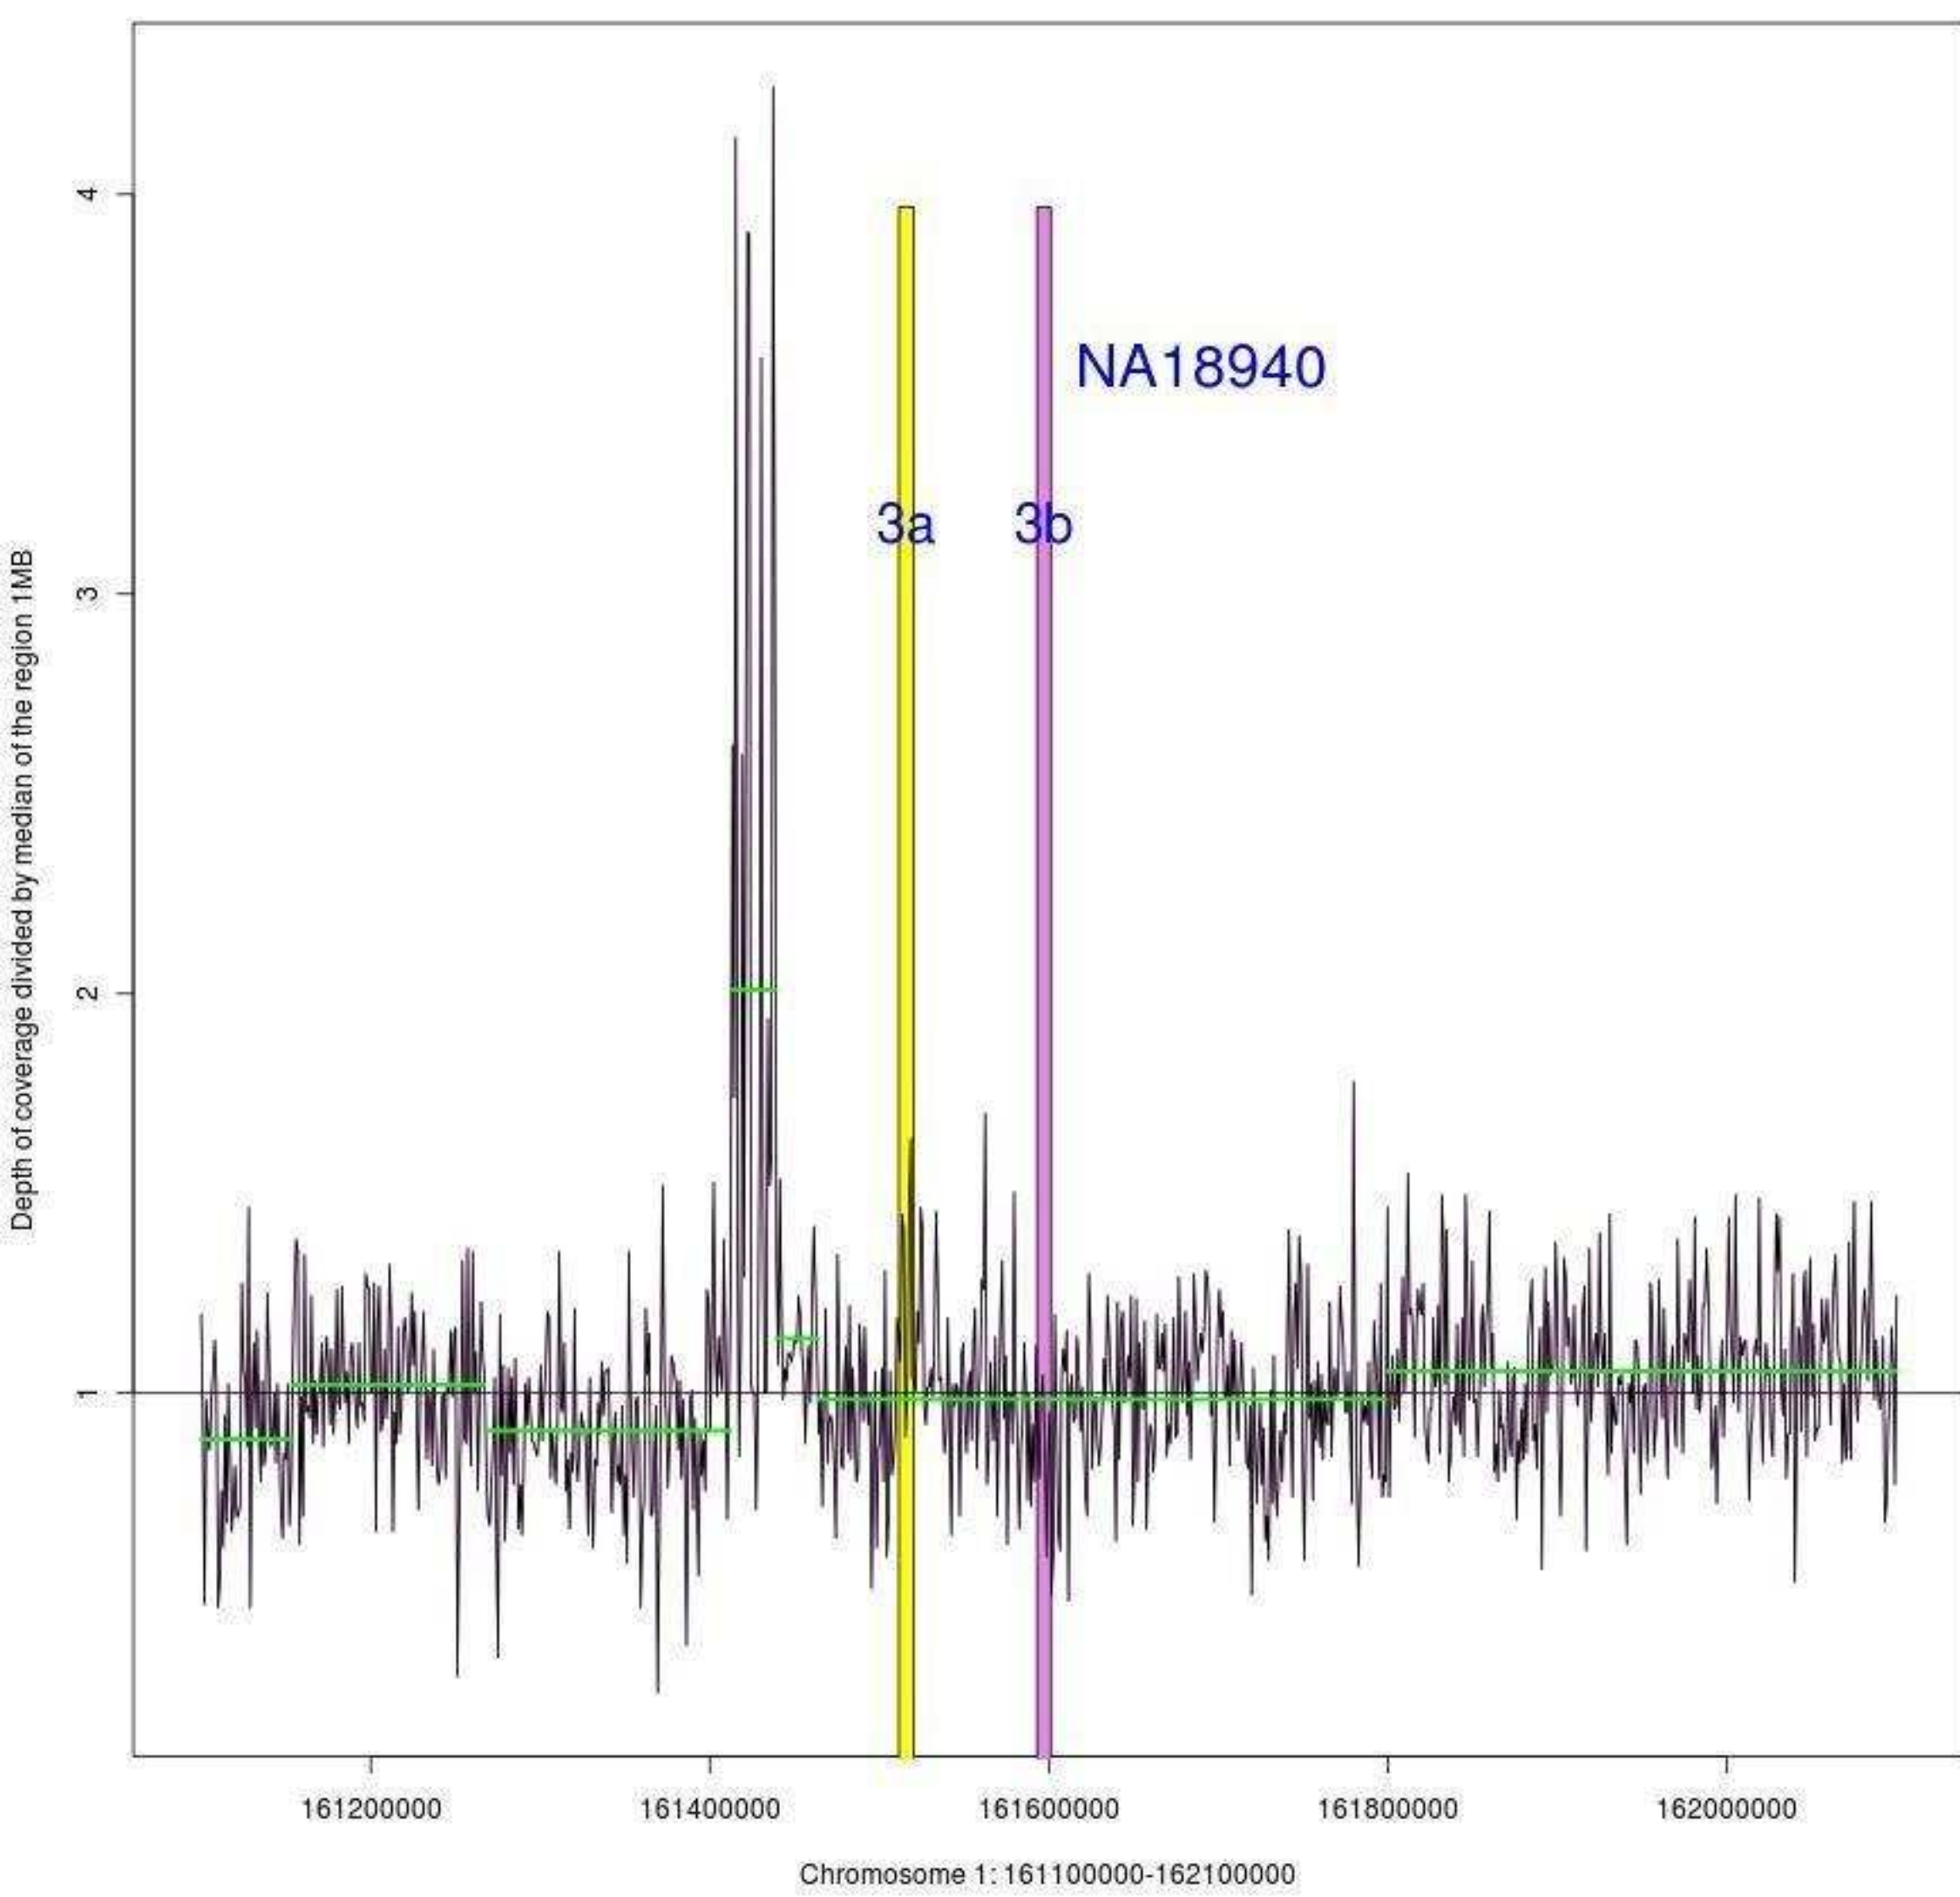

NA18940

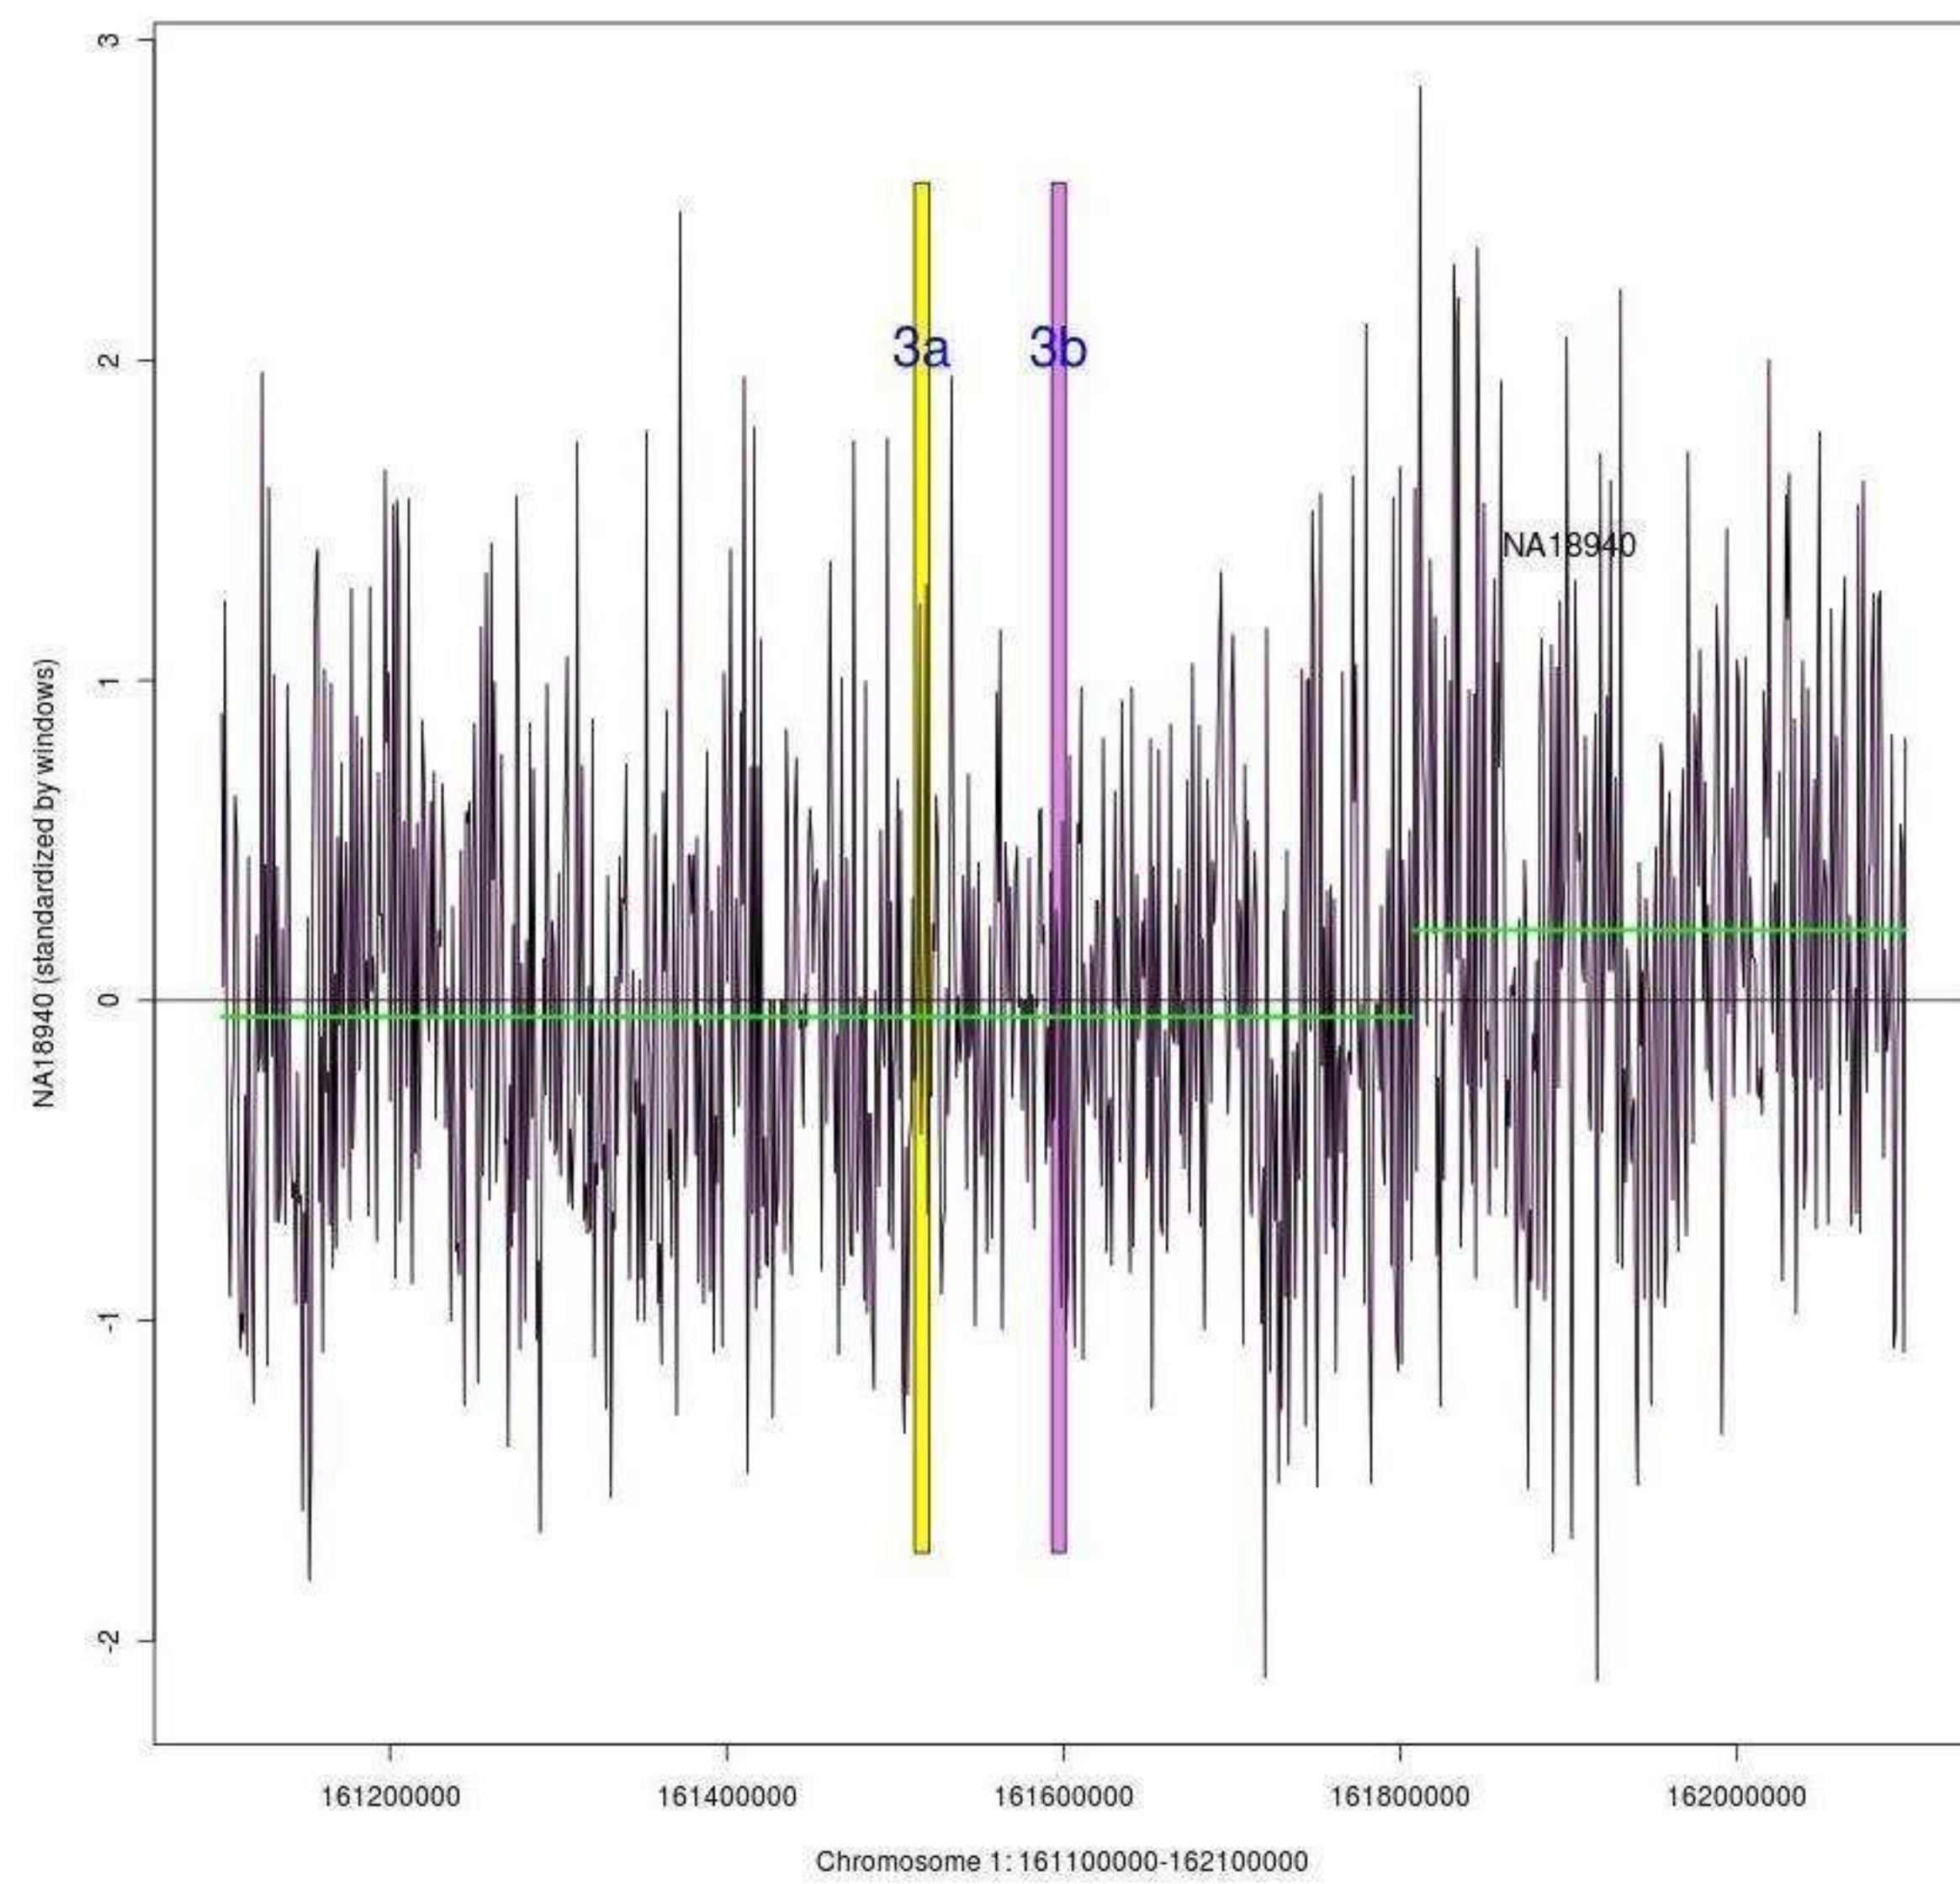



NA18949

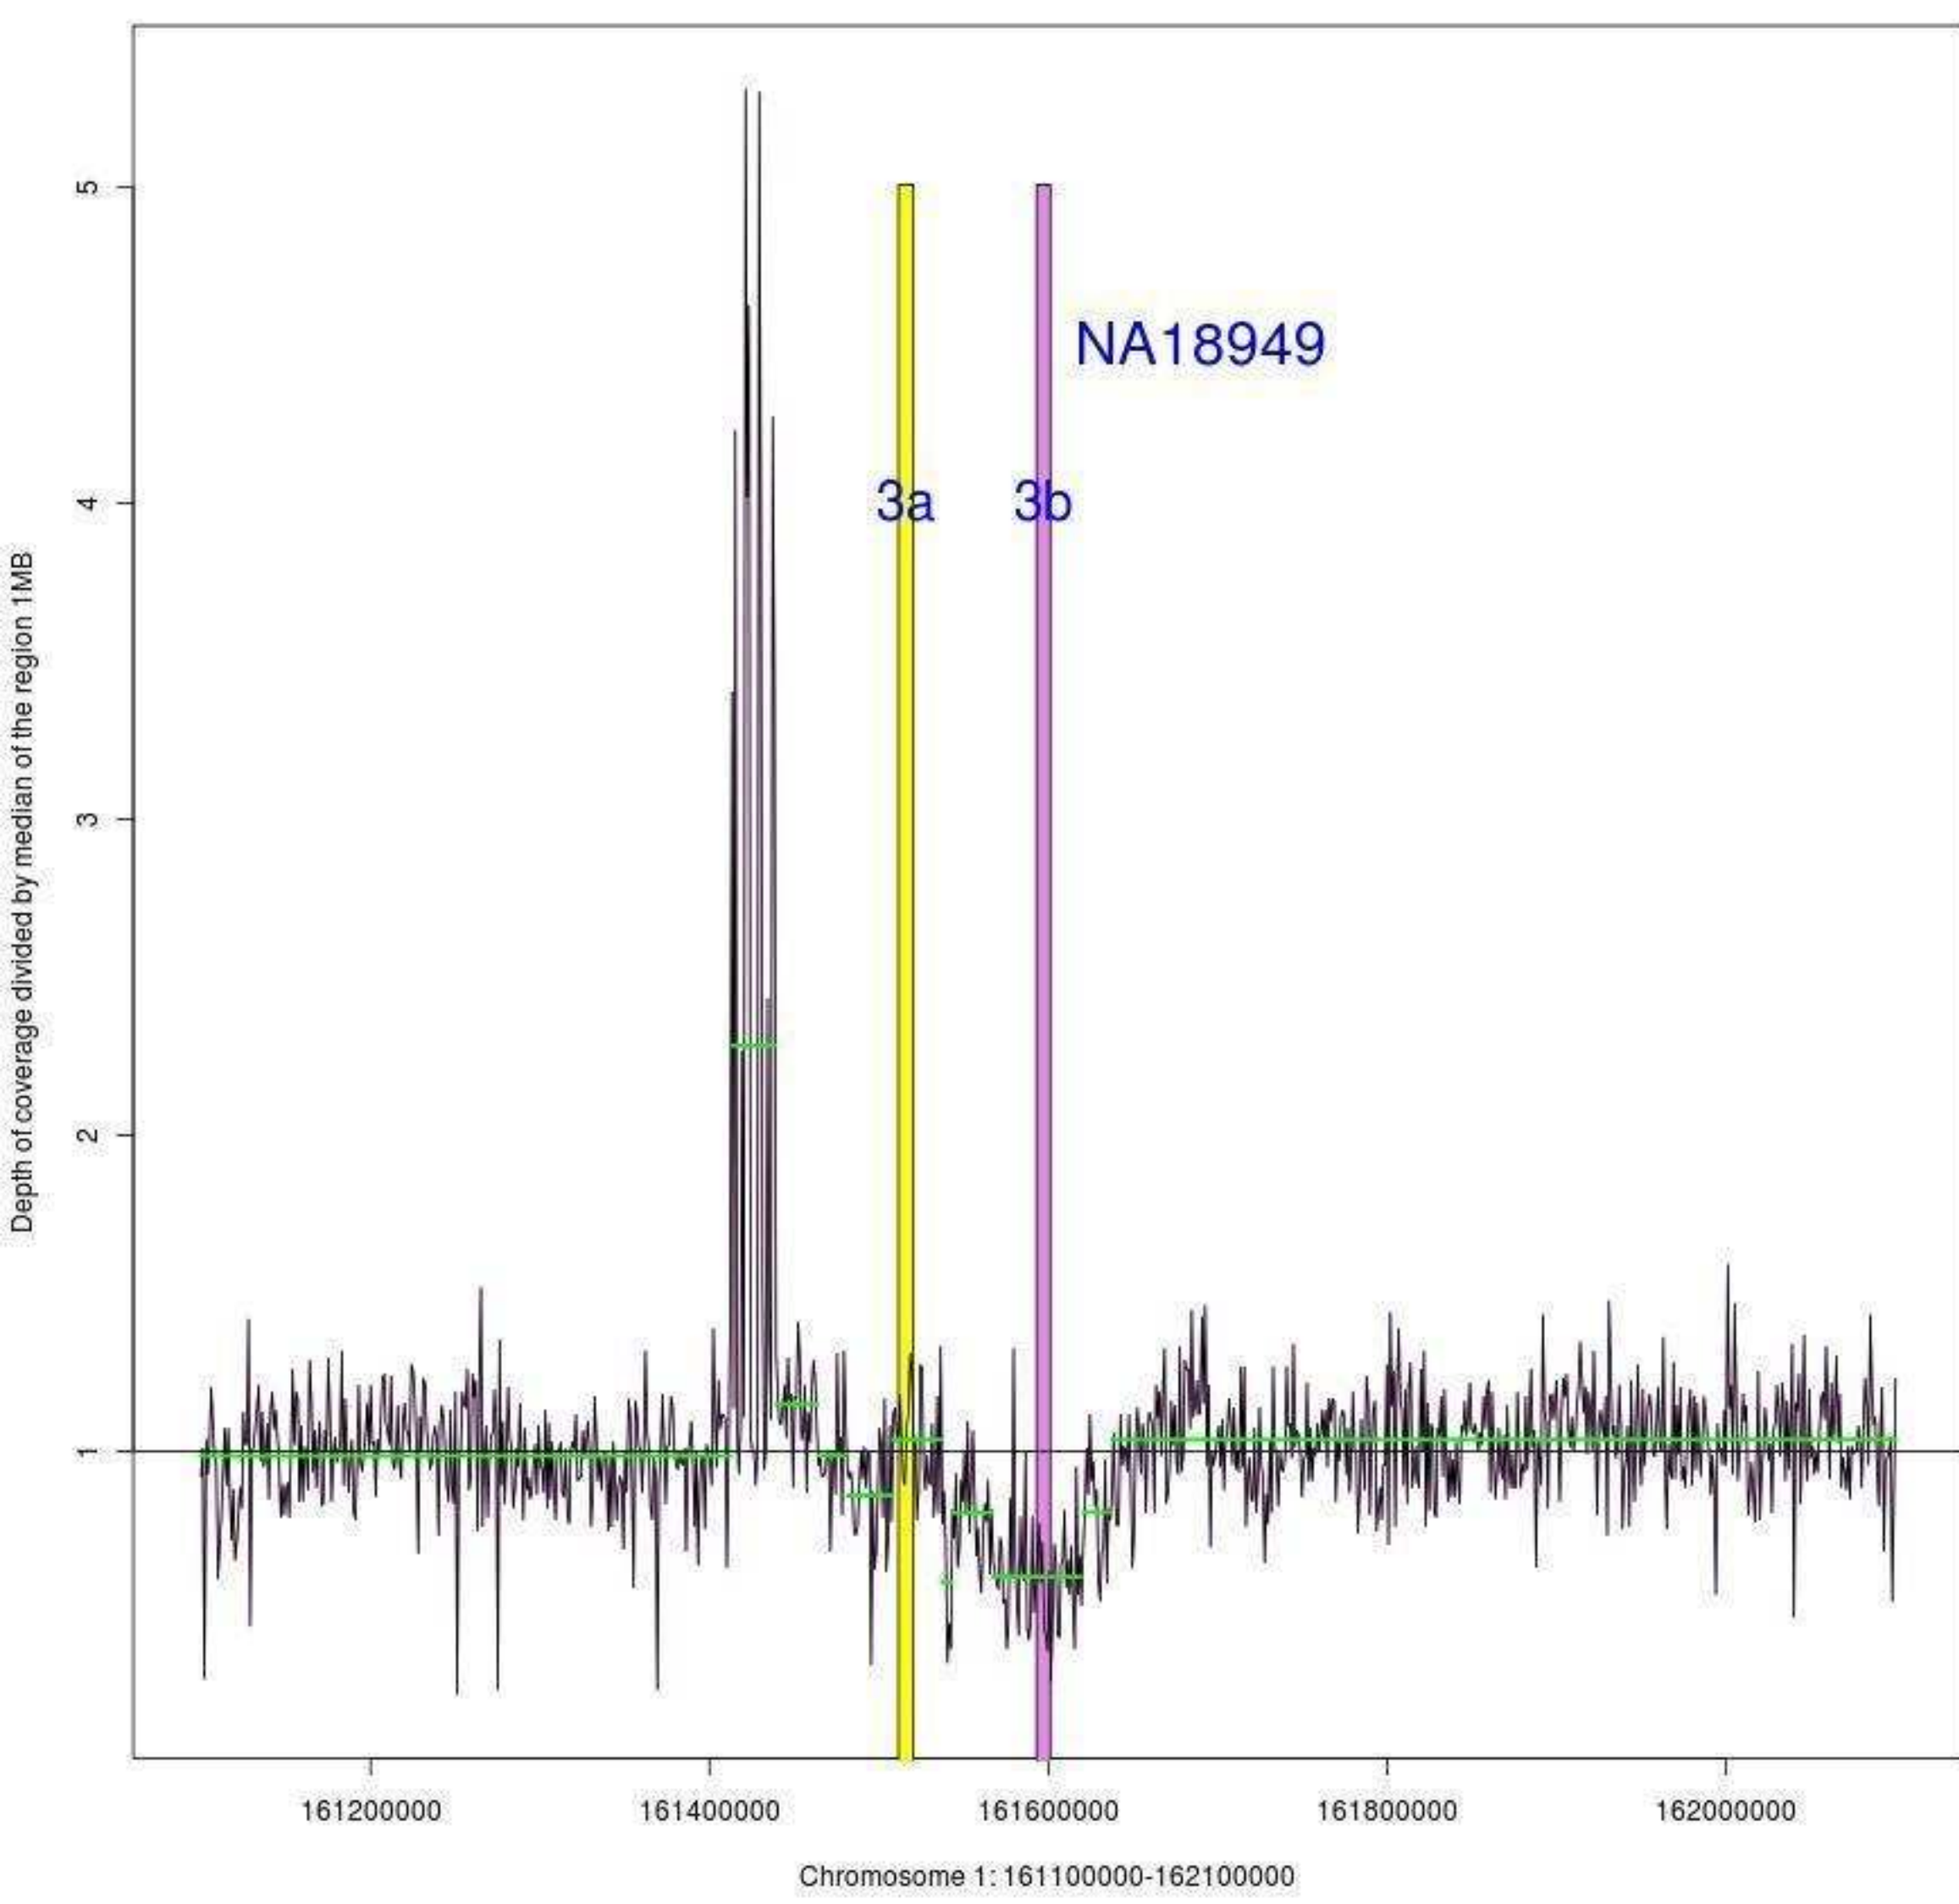

NA18949

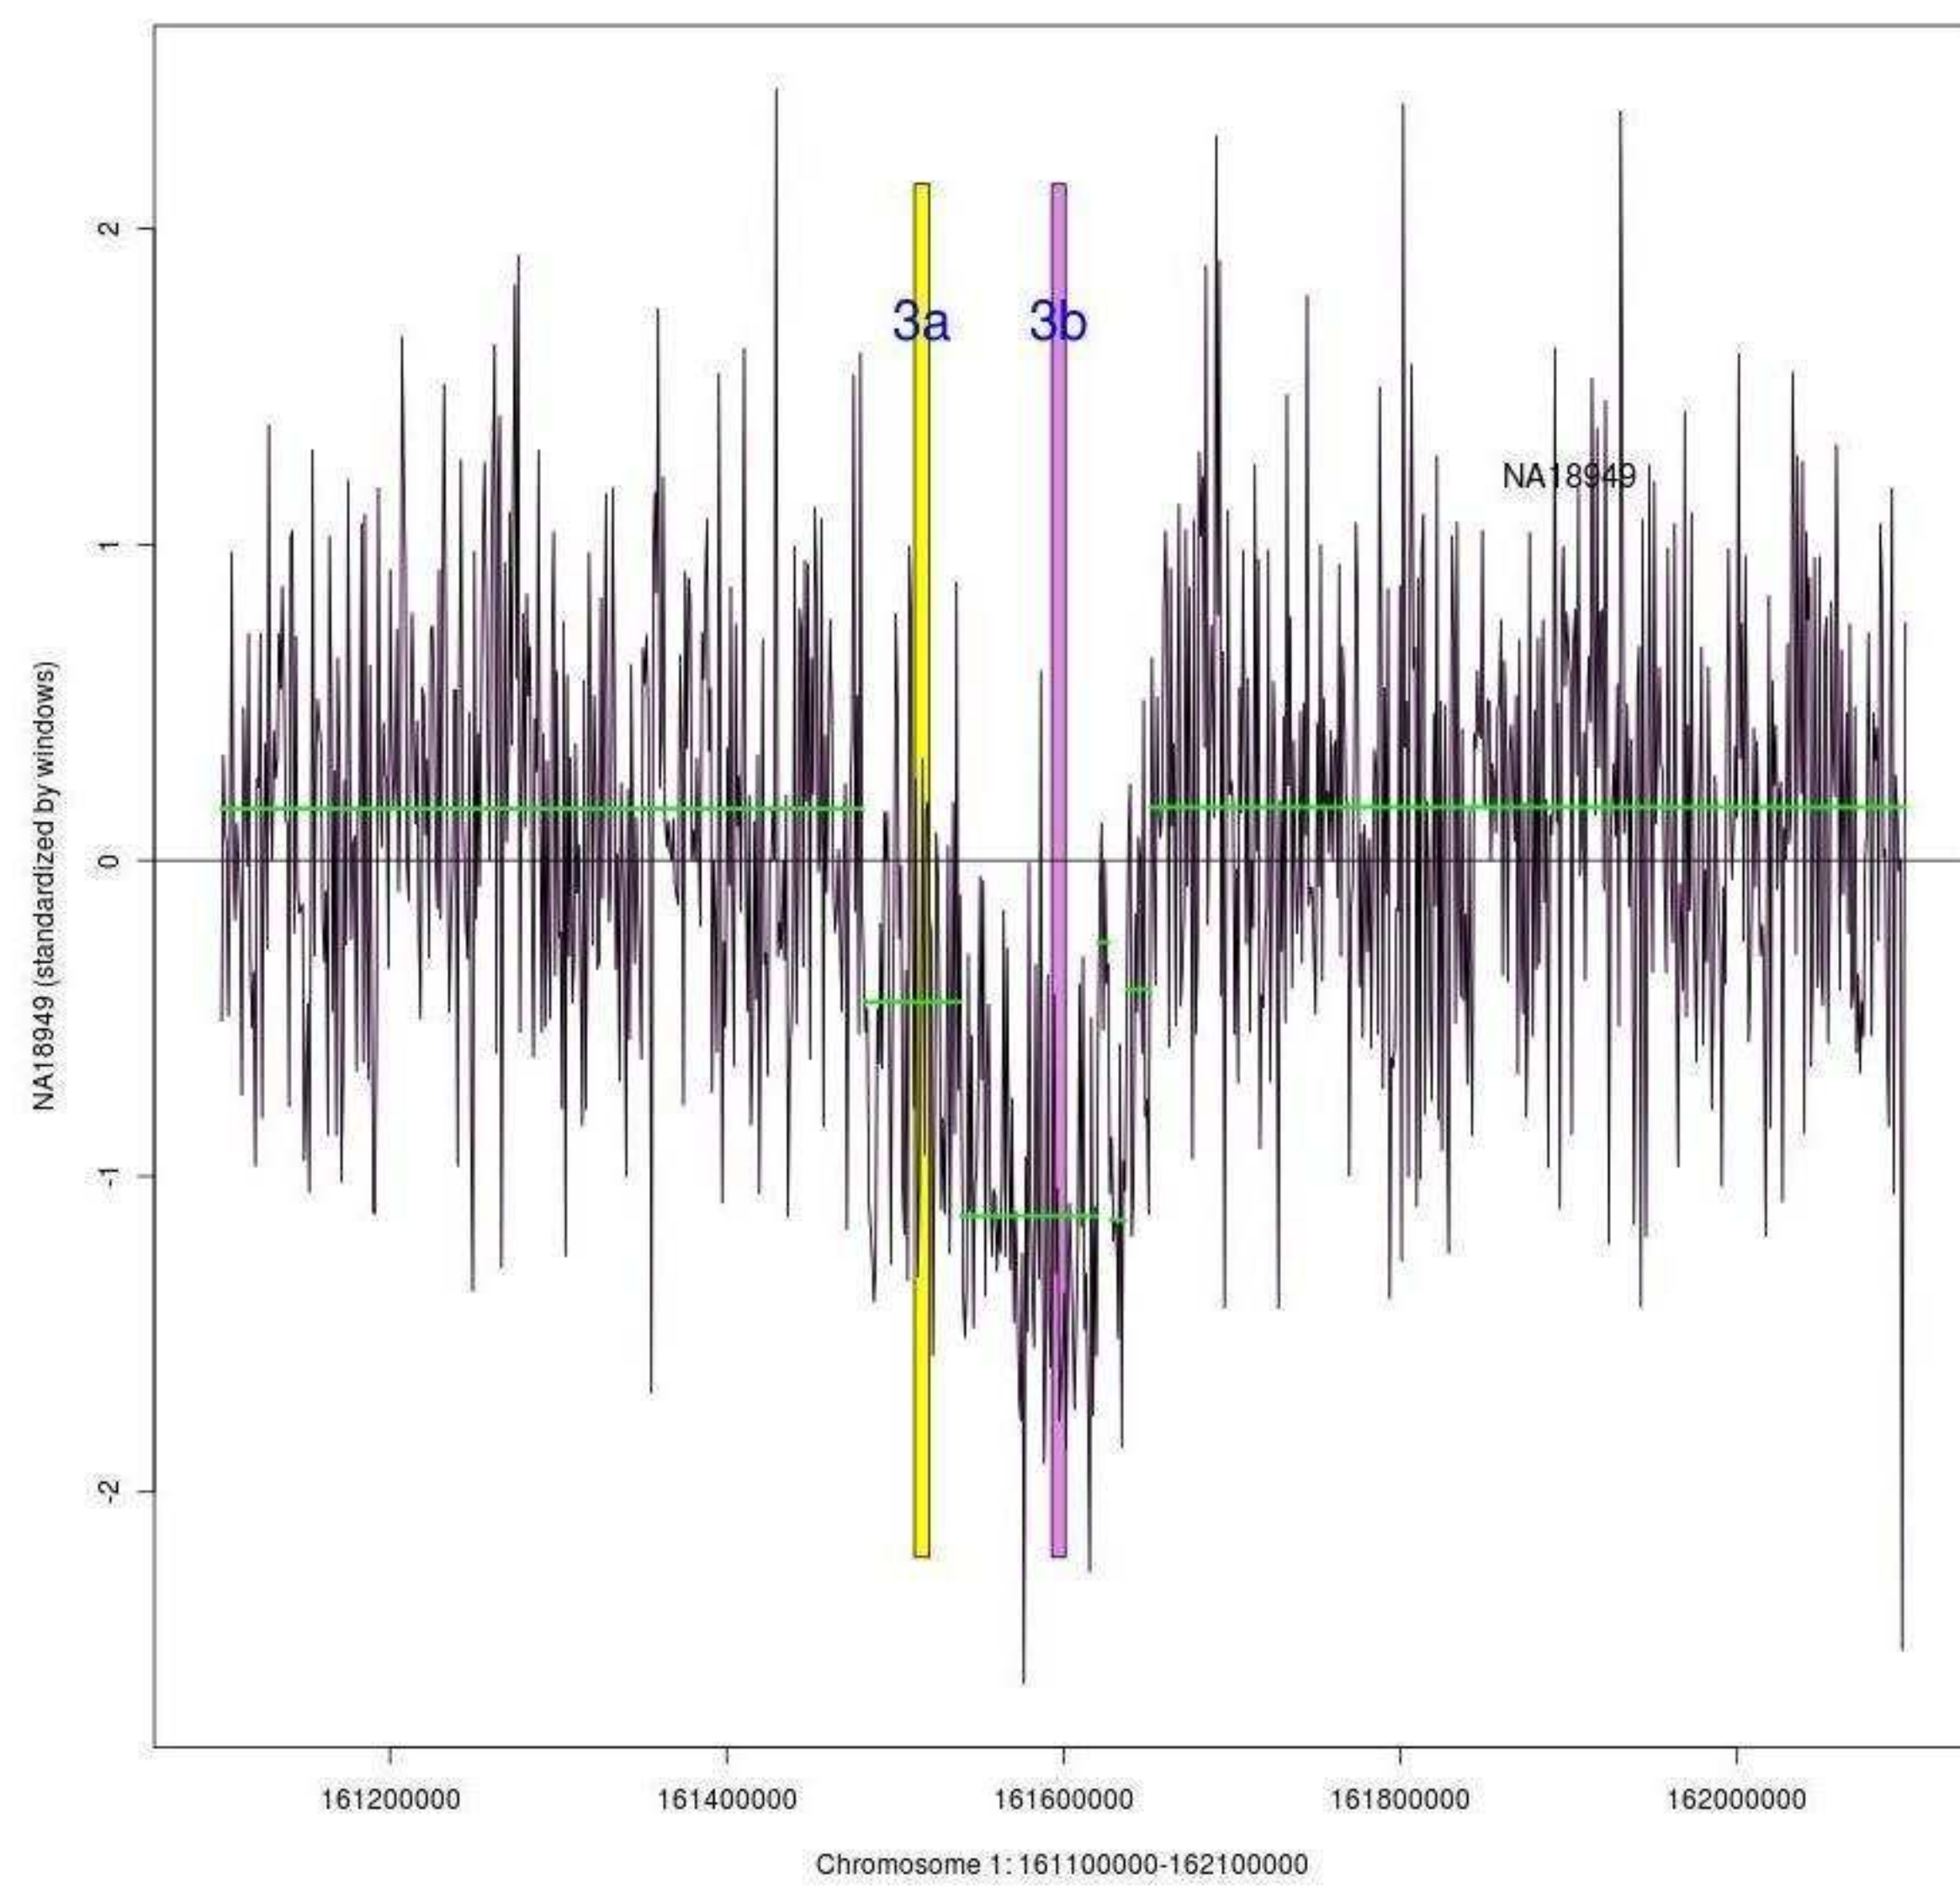

NA18956

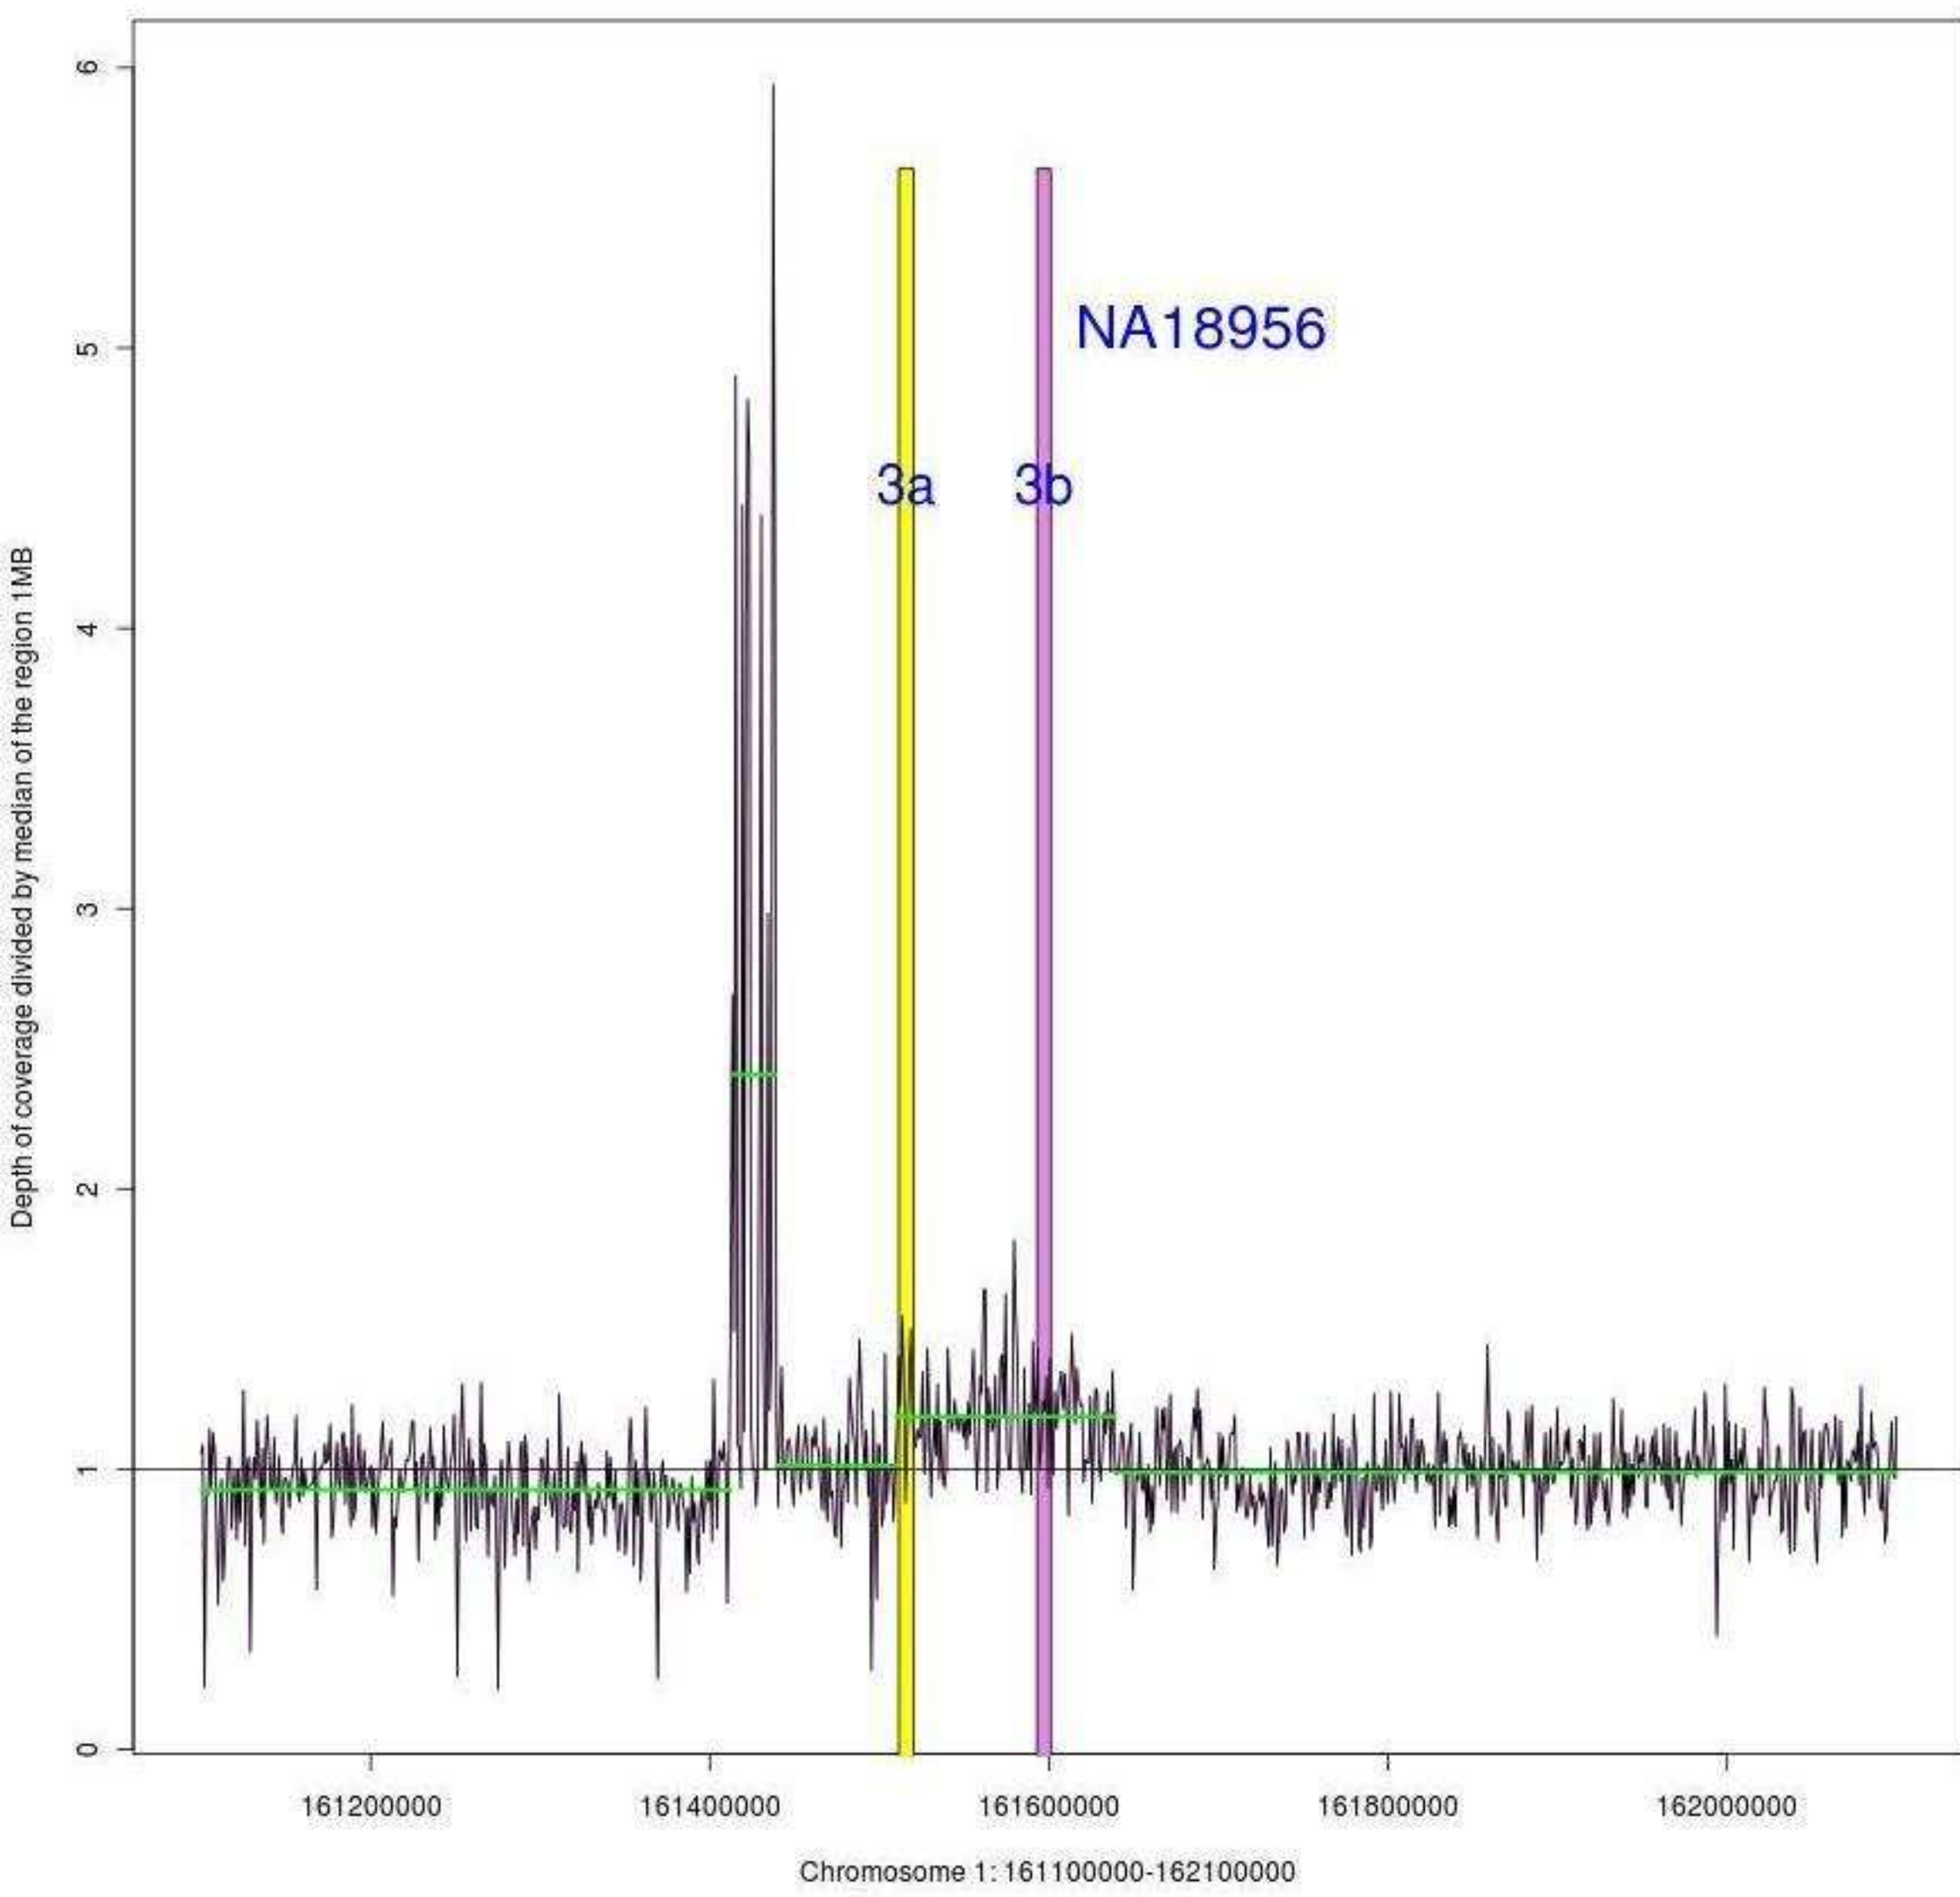

NA18956

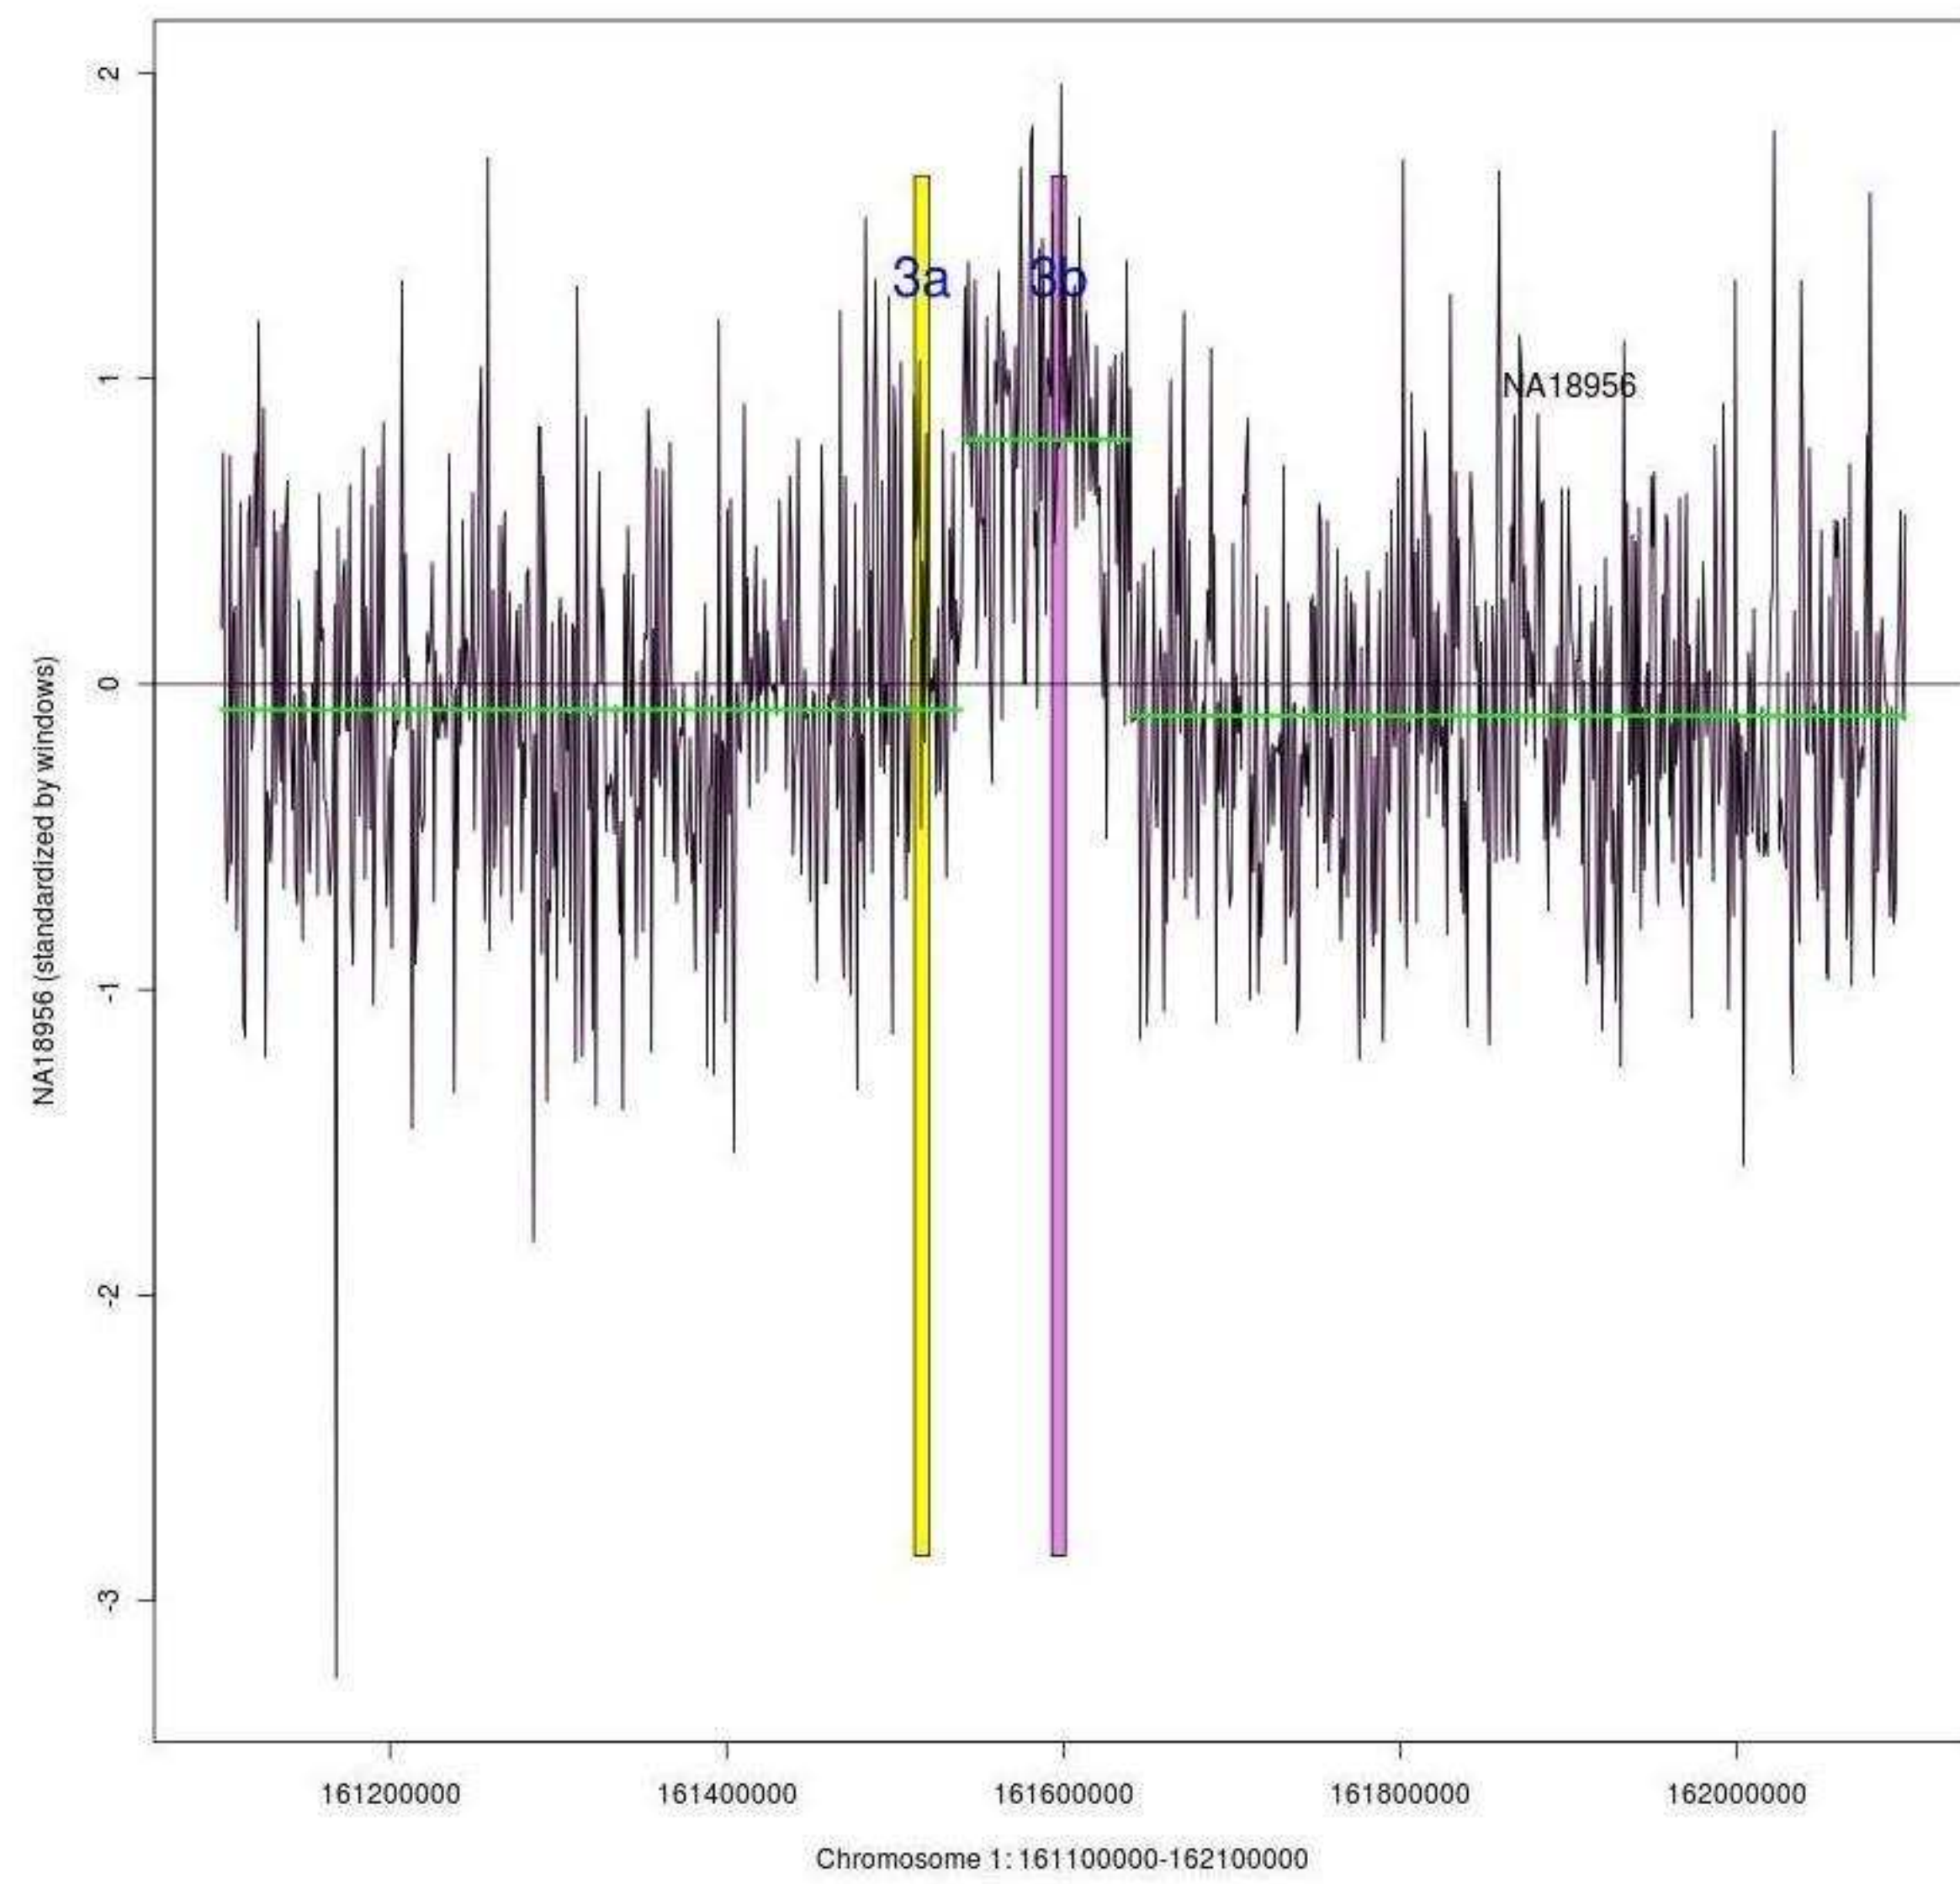

NA18960

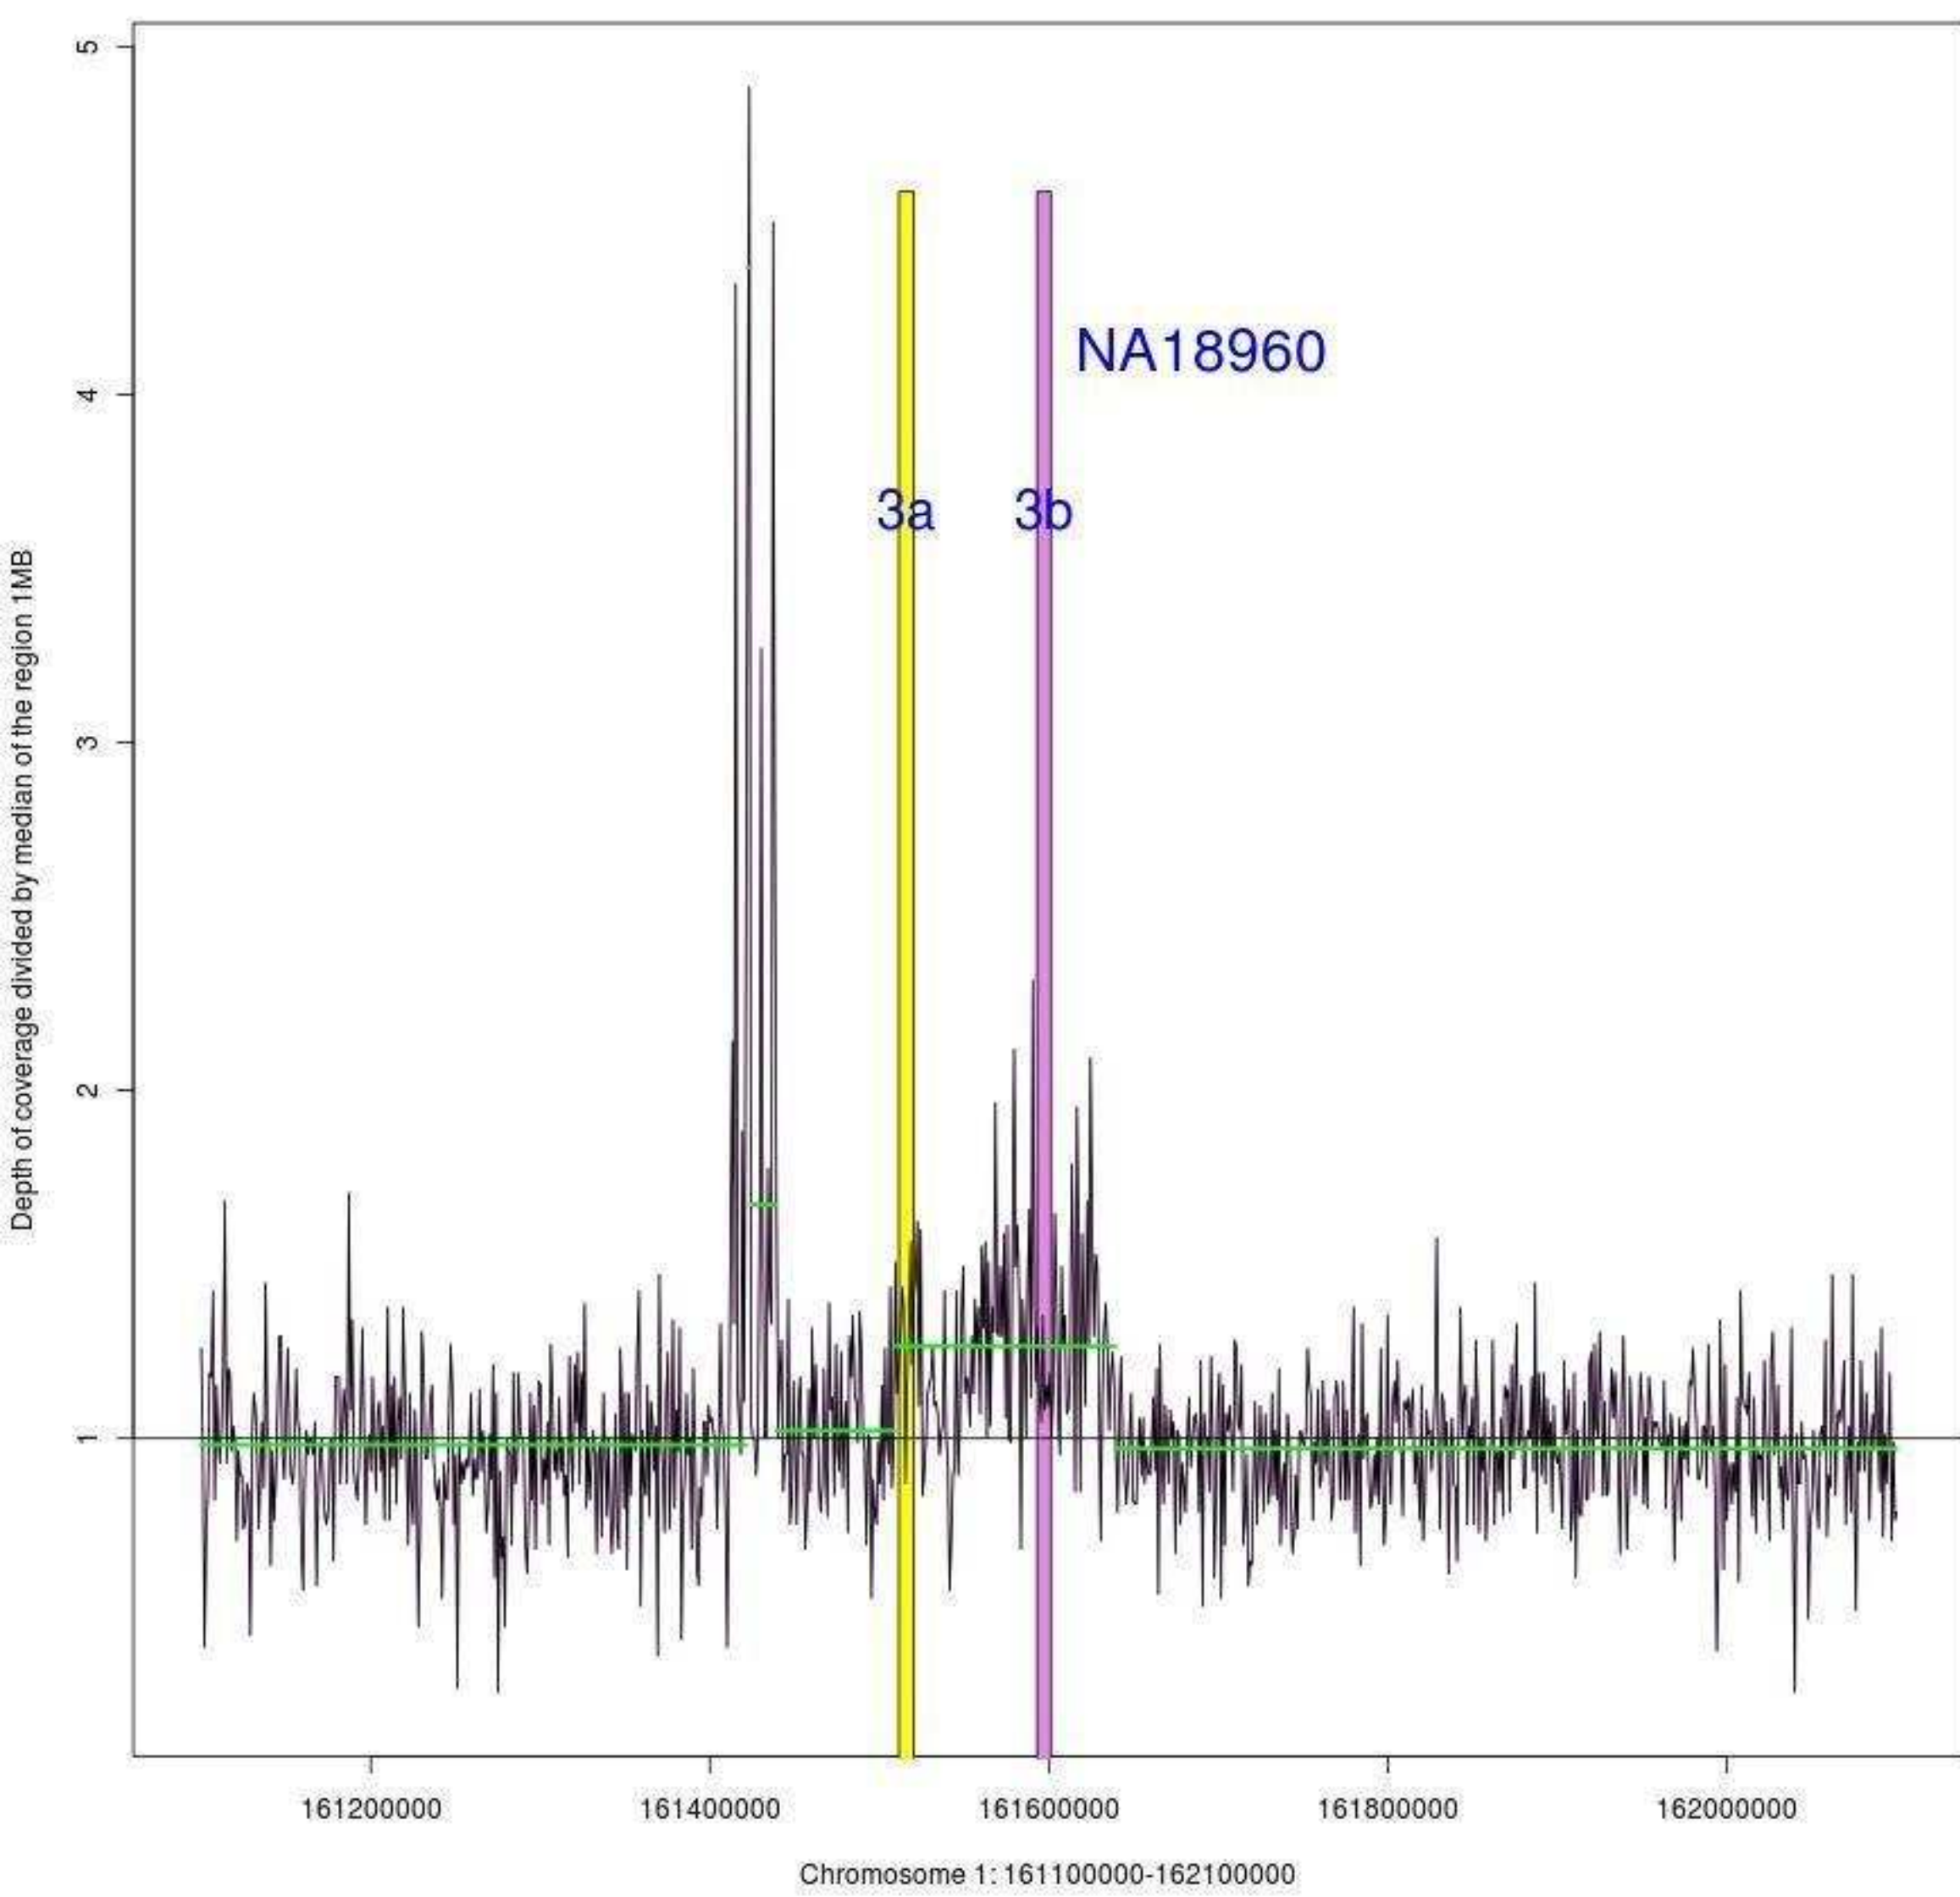

NA18960

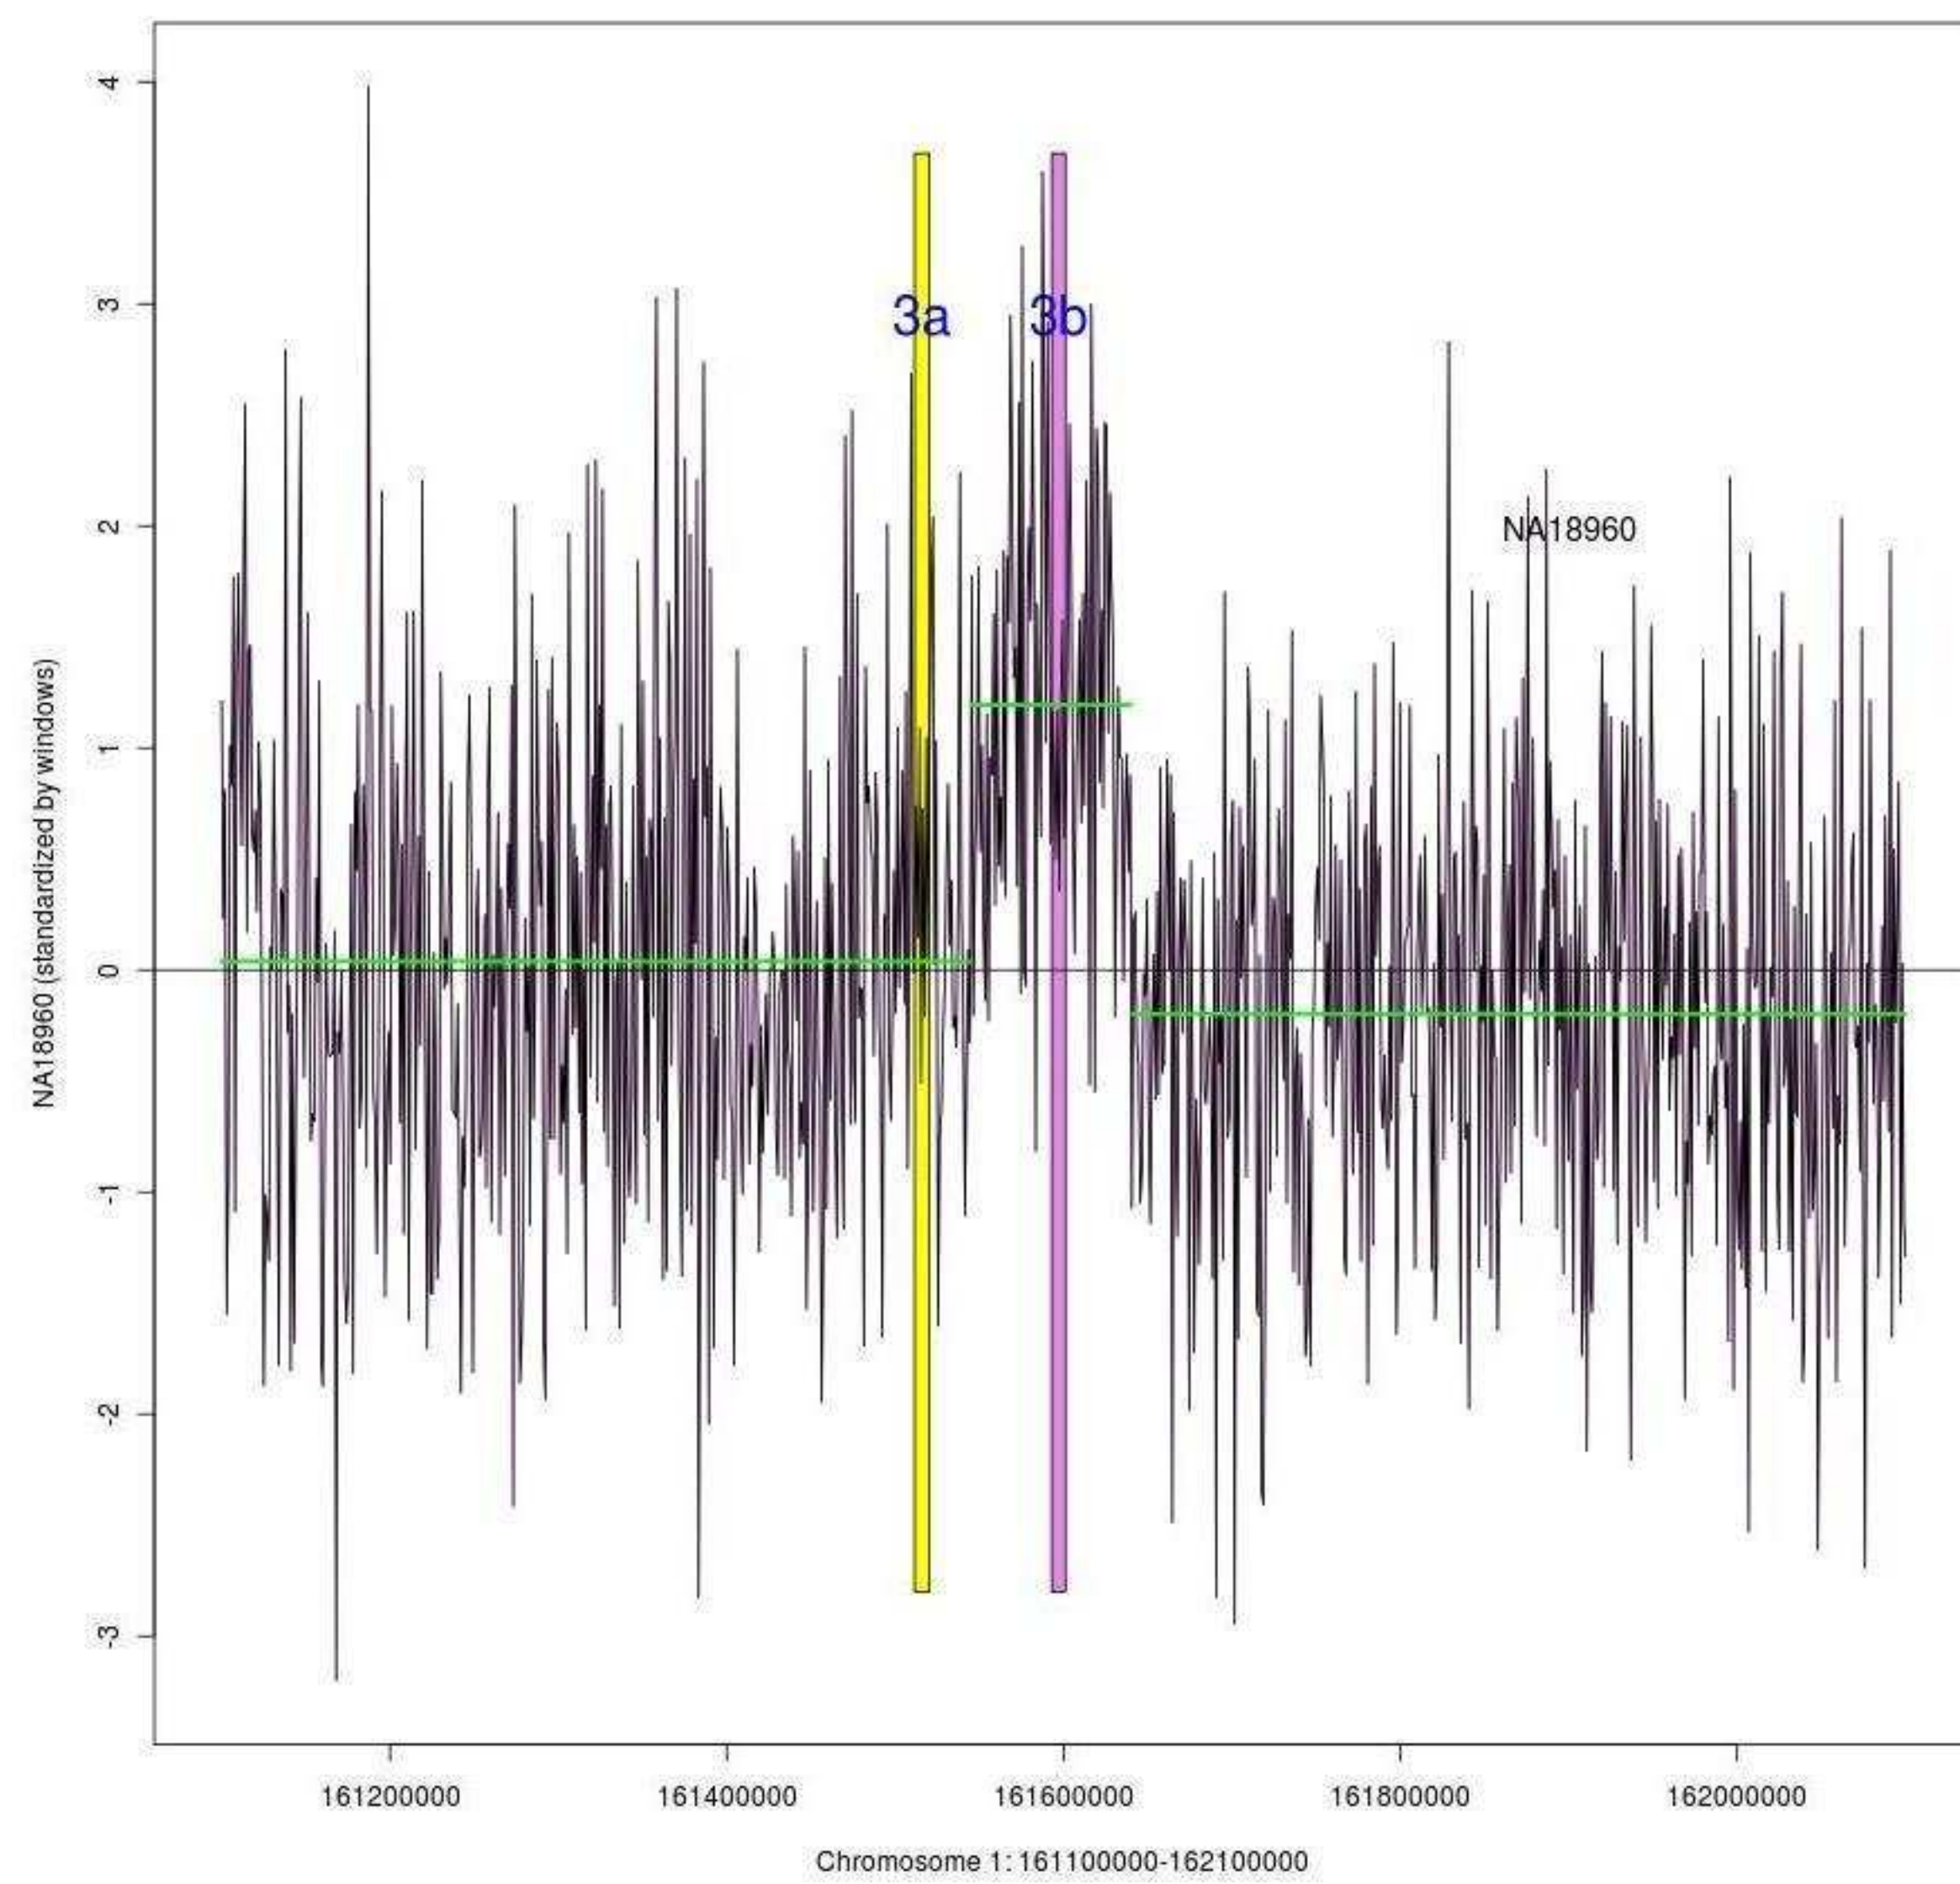



NA18971

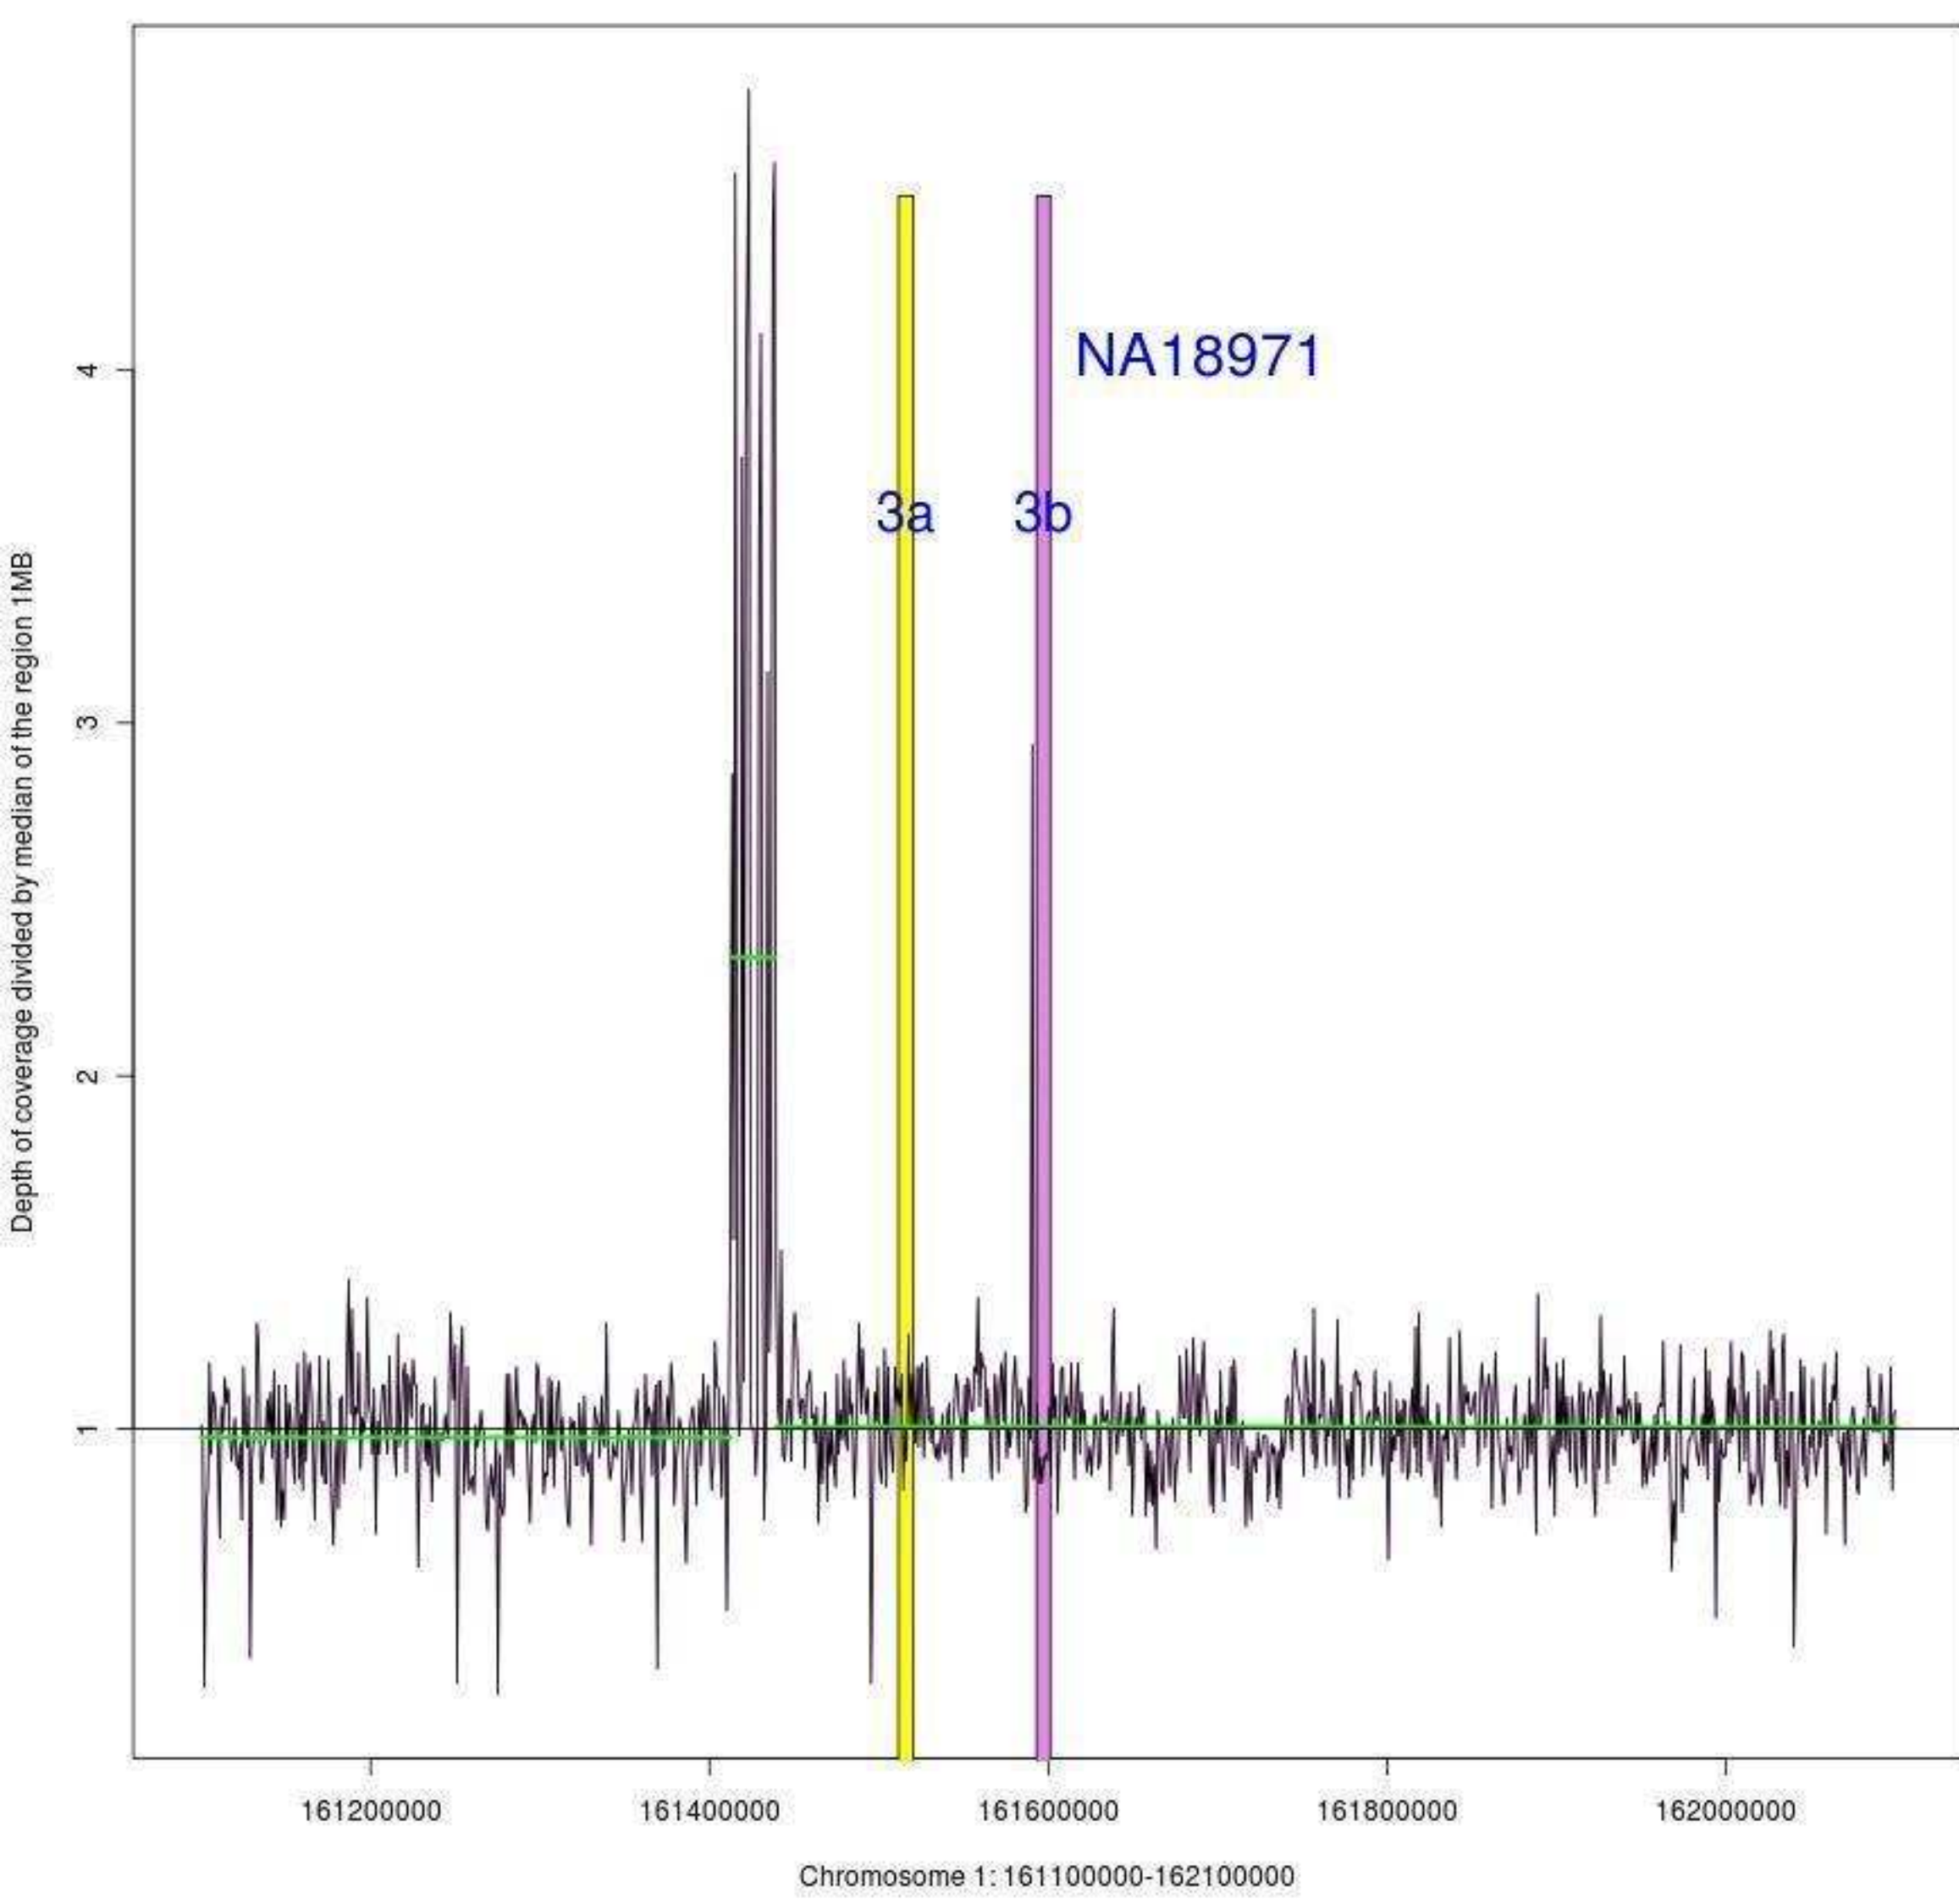

NA18971

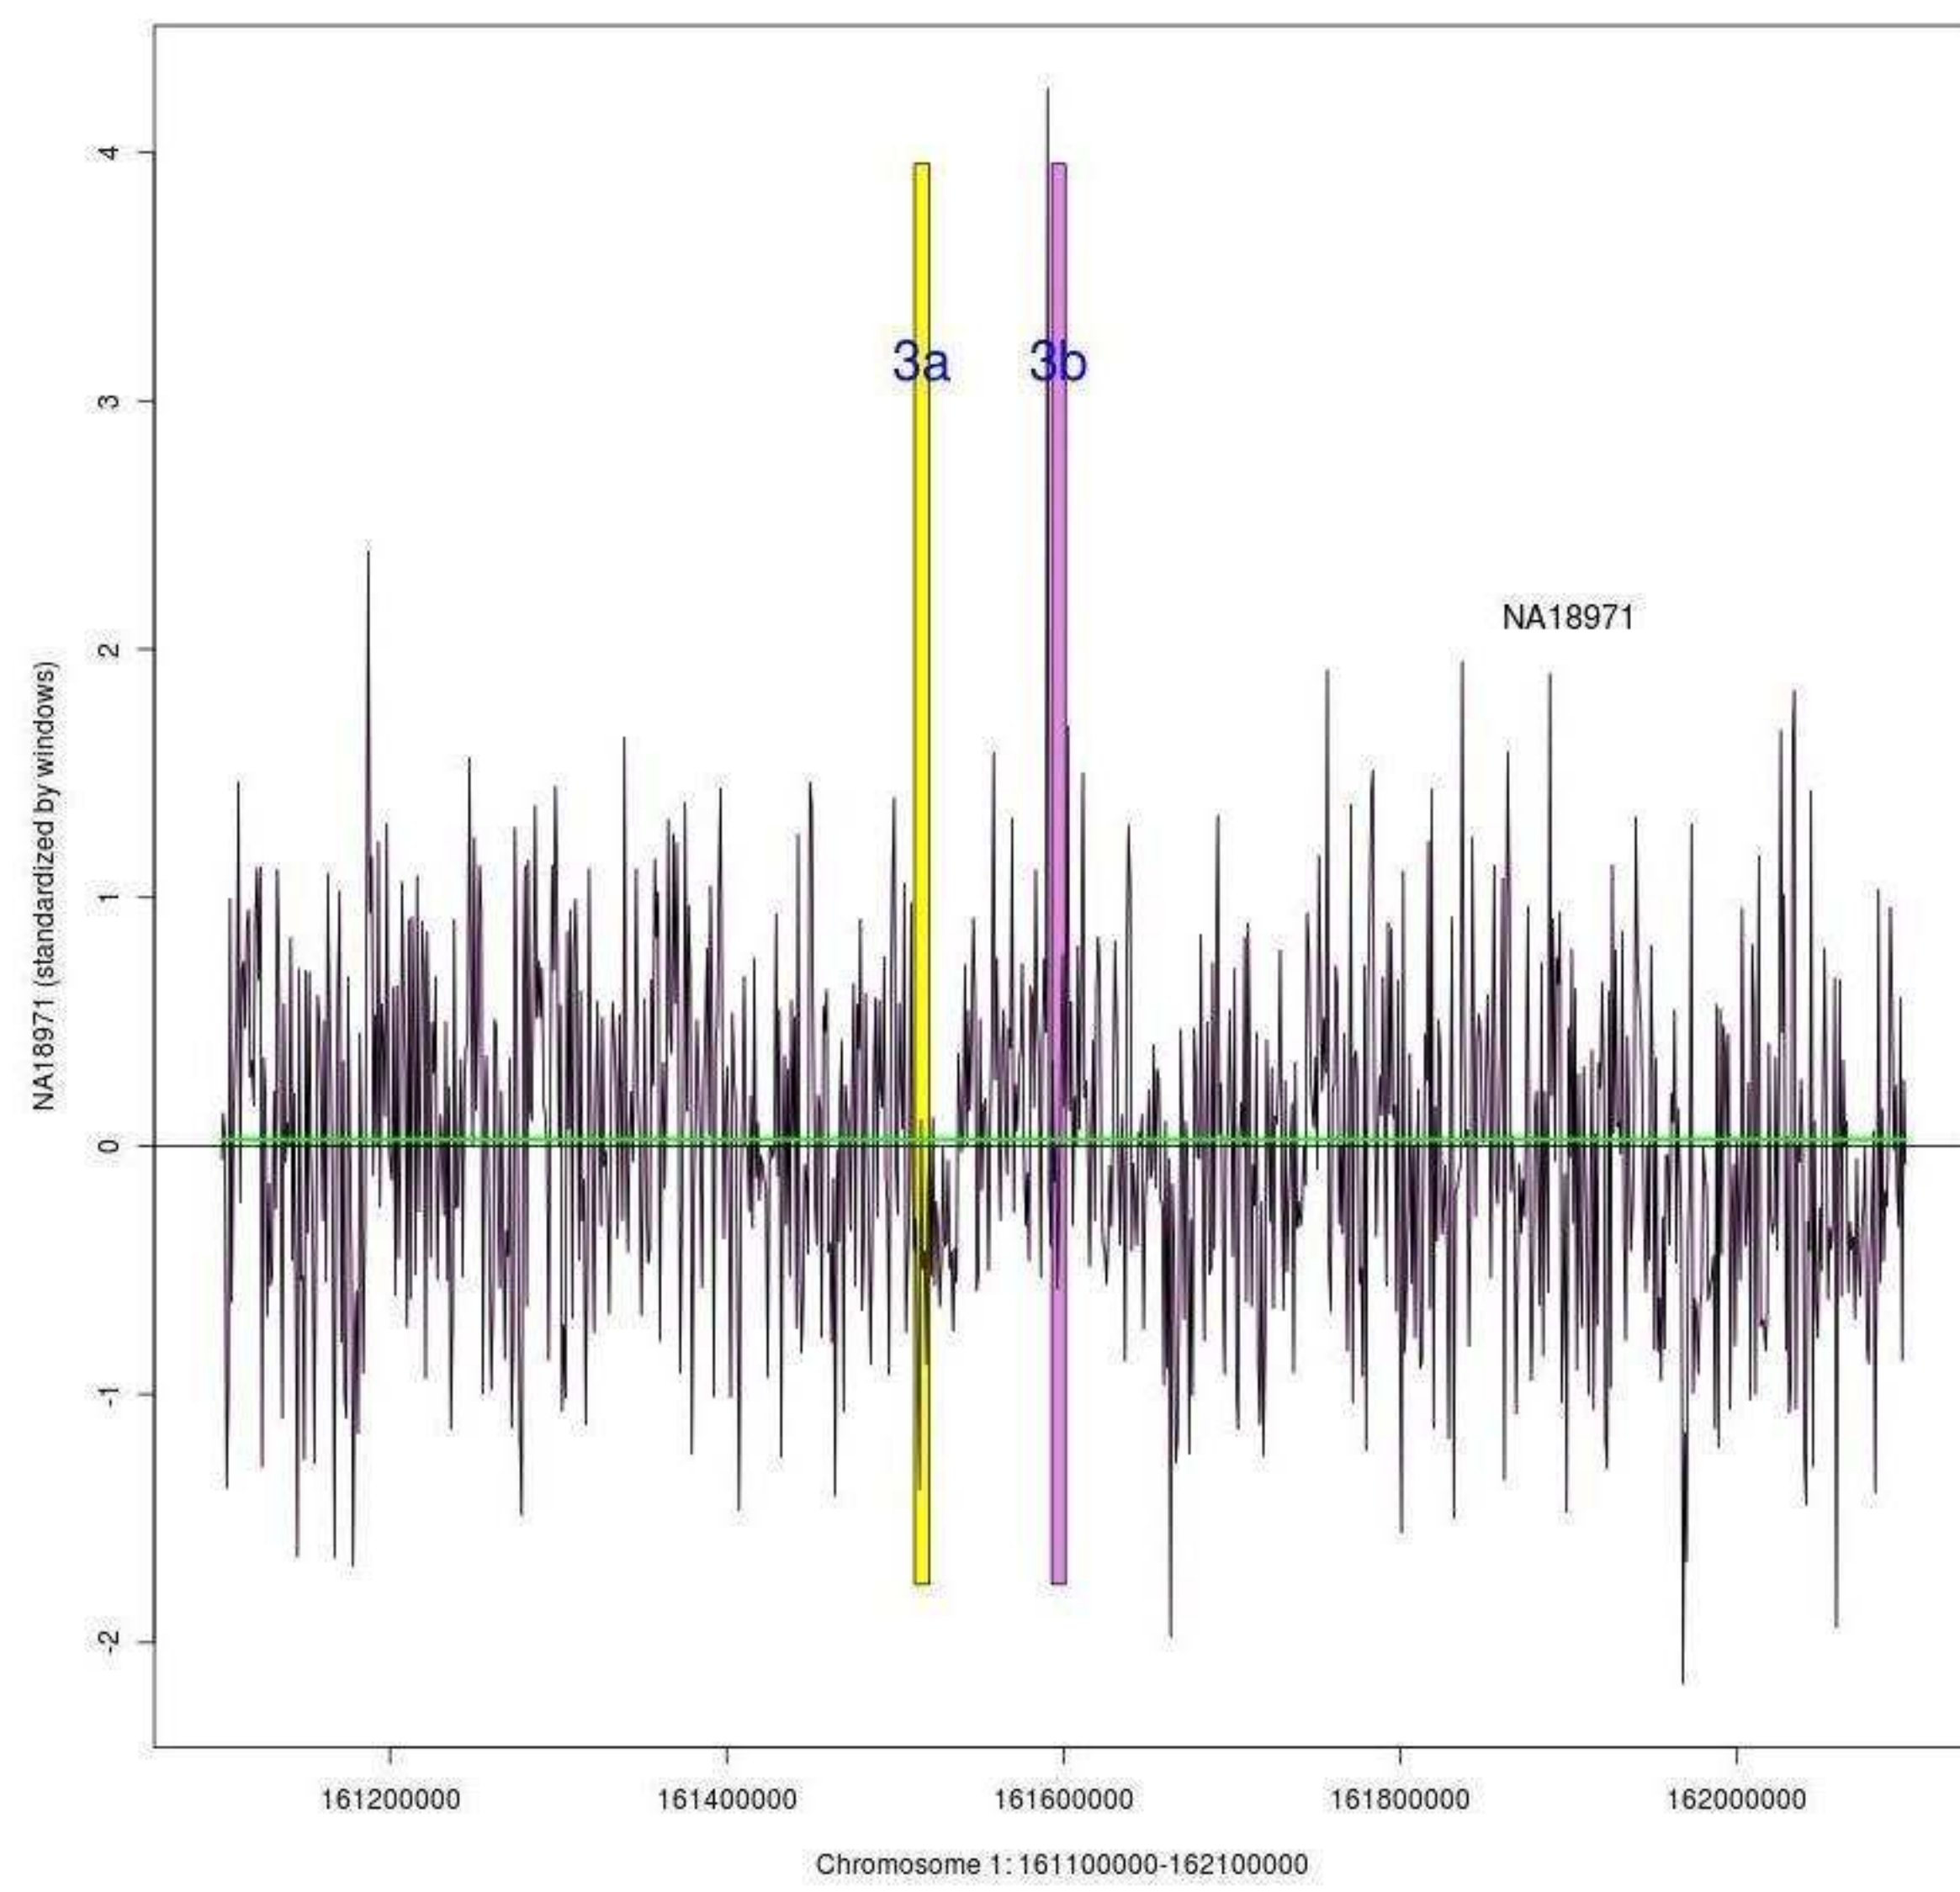

NA18974

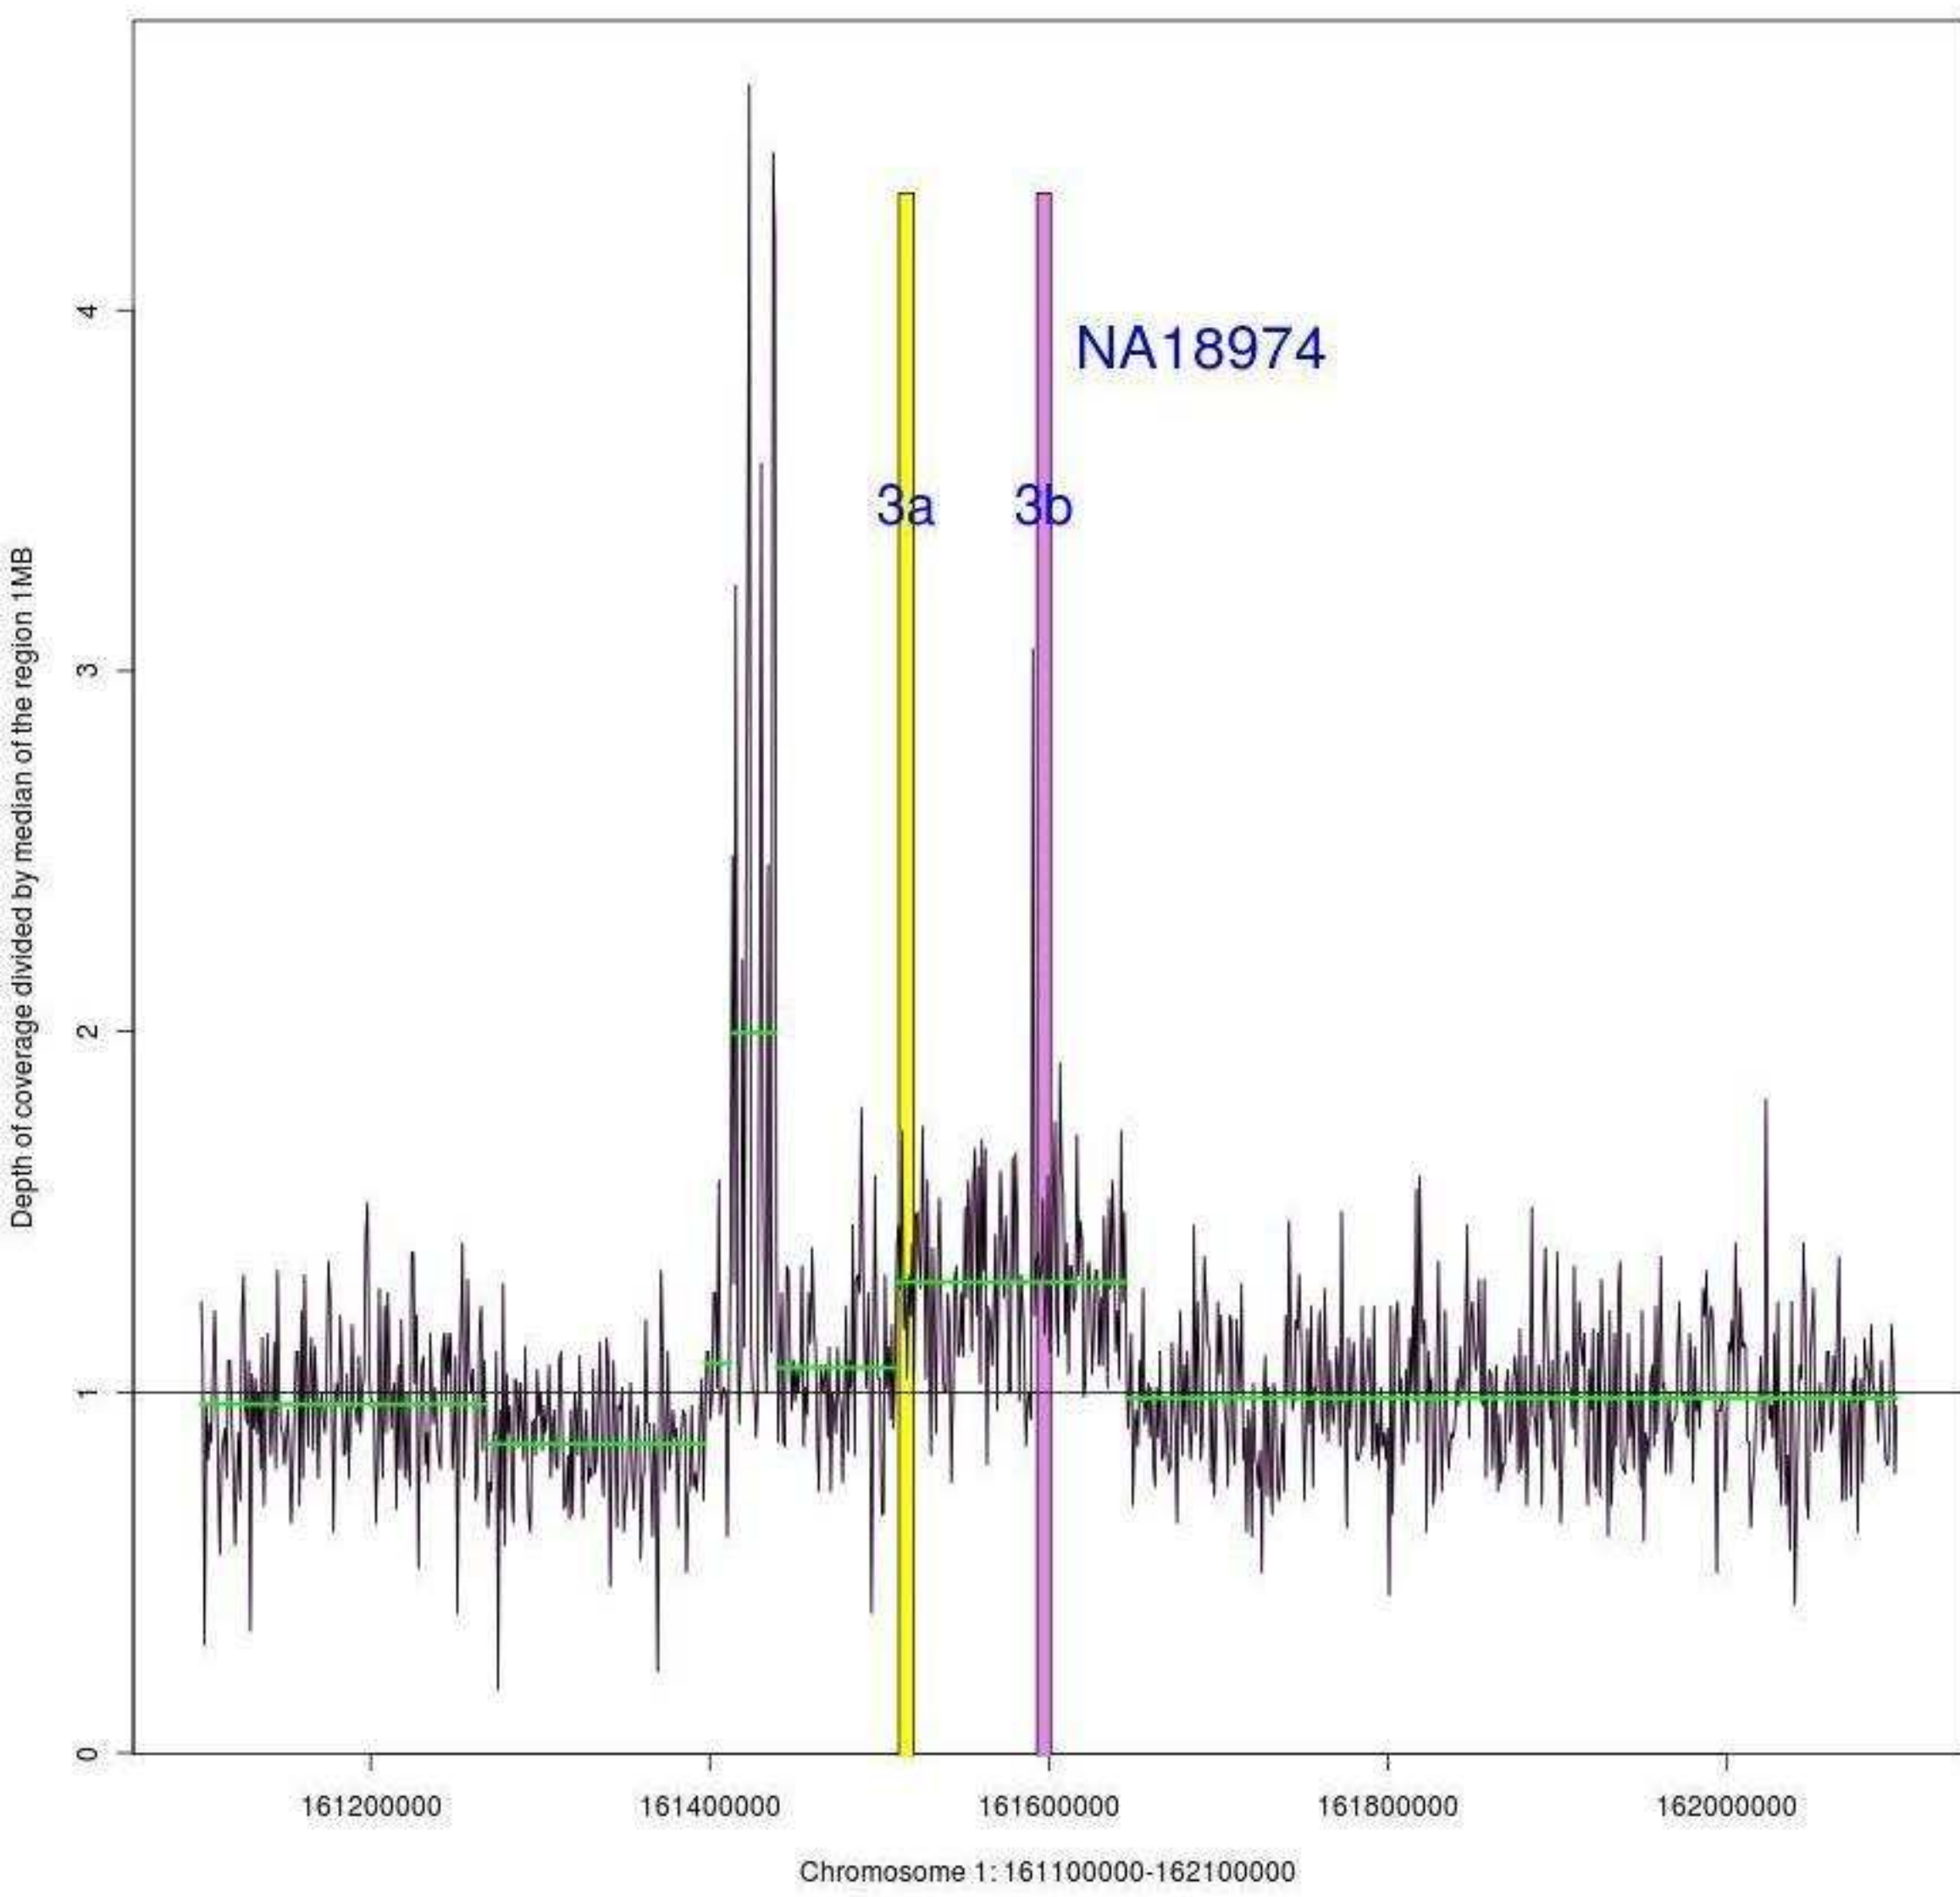

NA18974

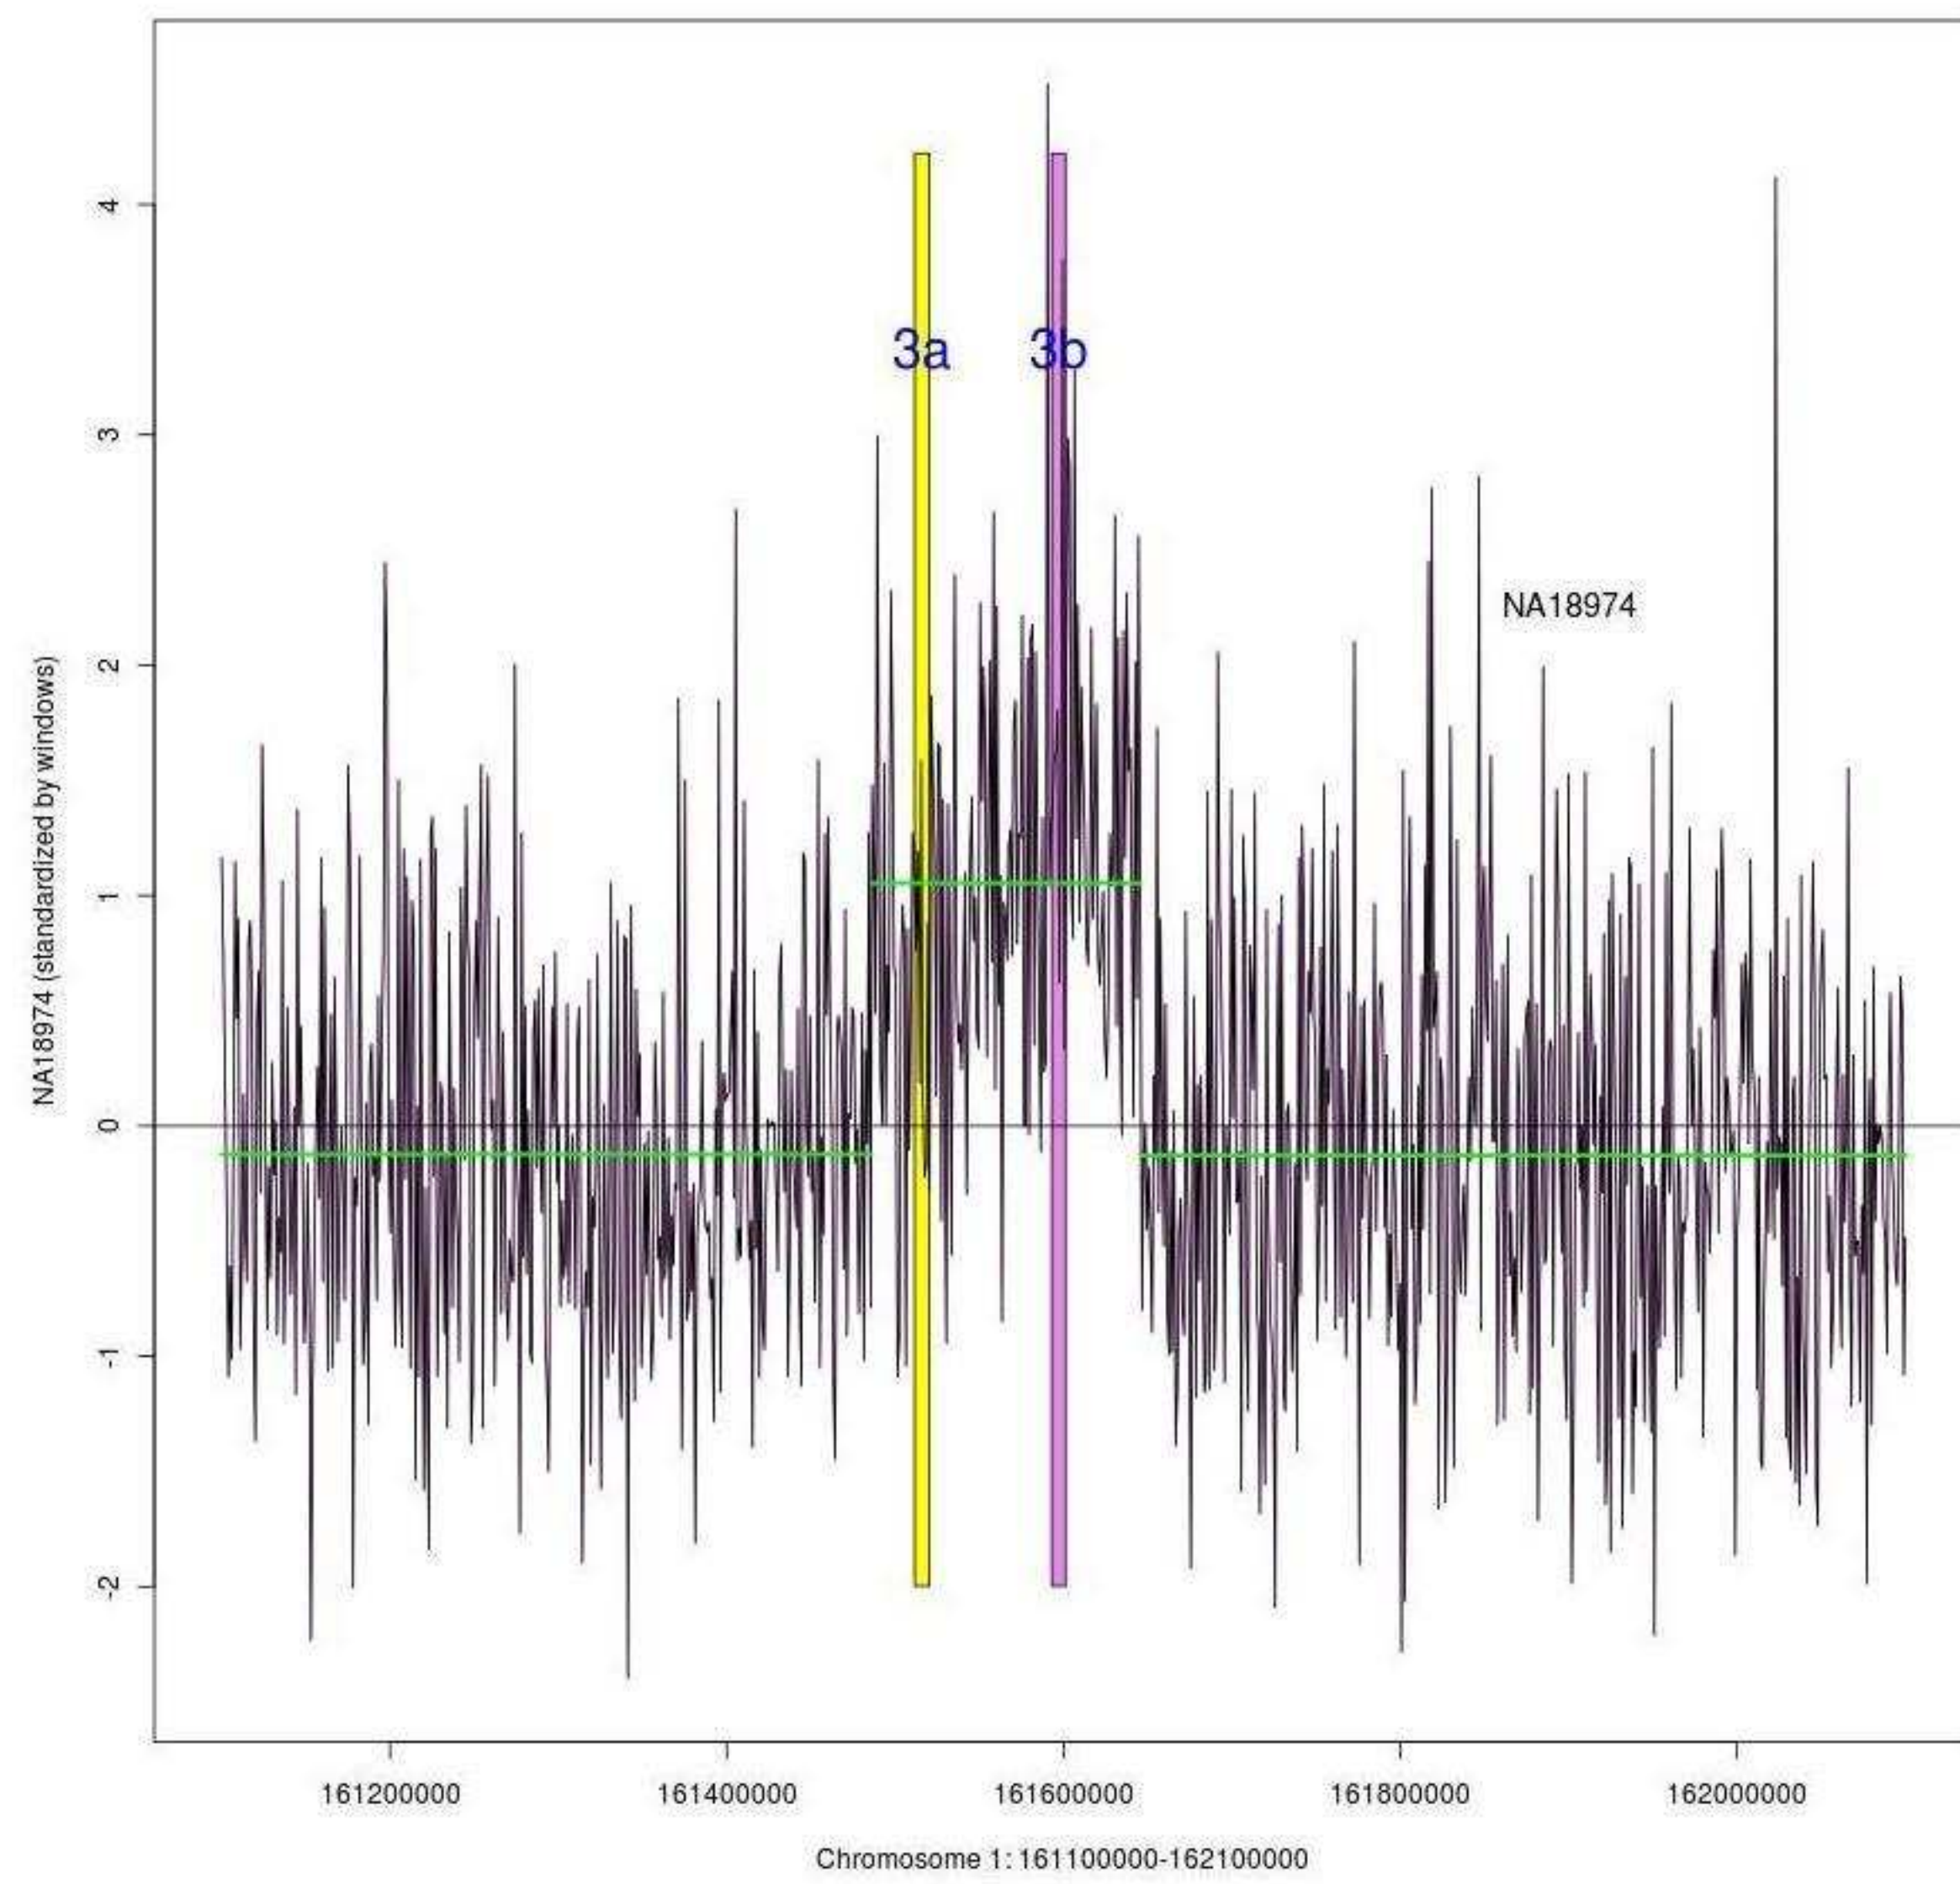

NA18975

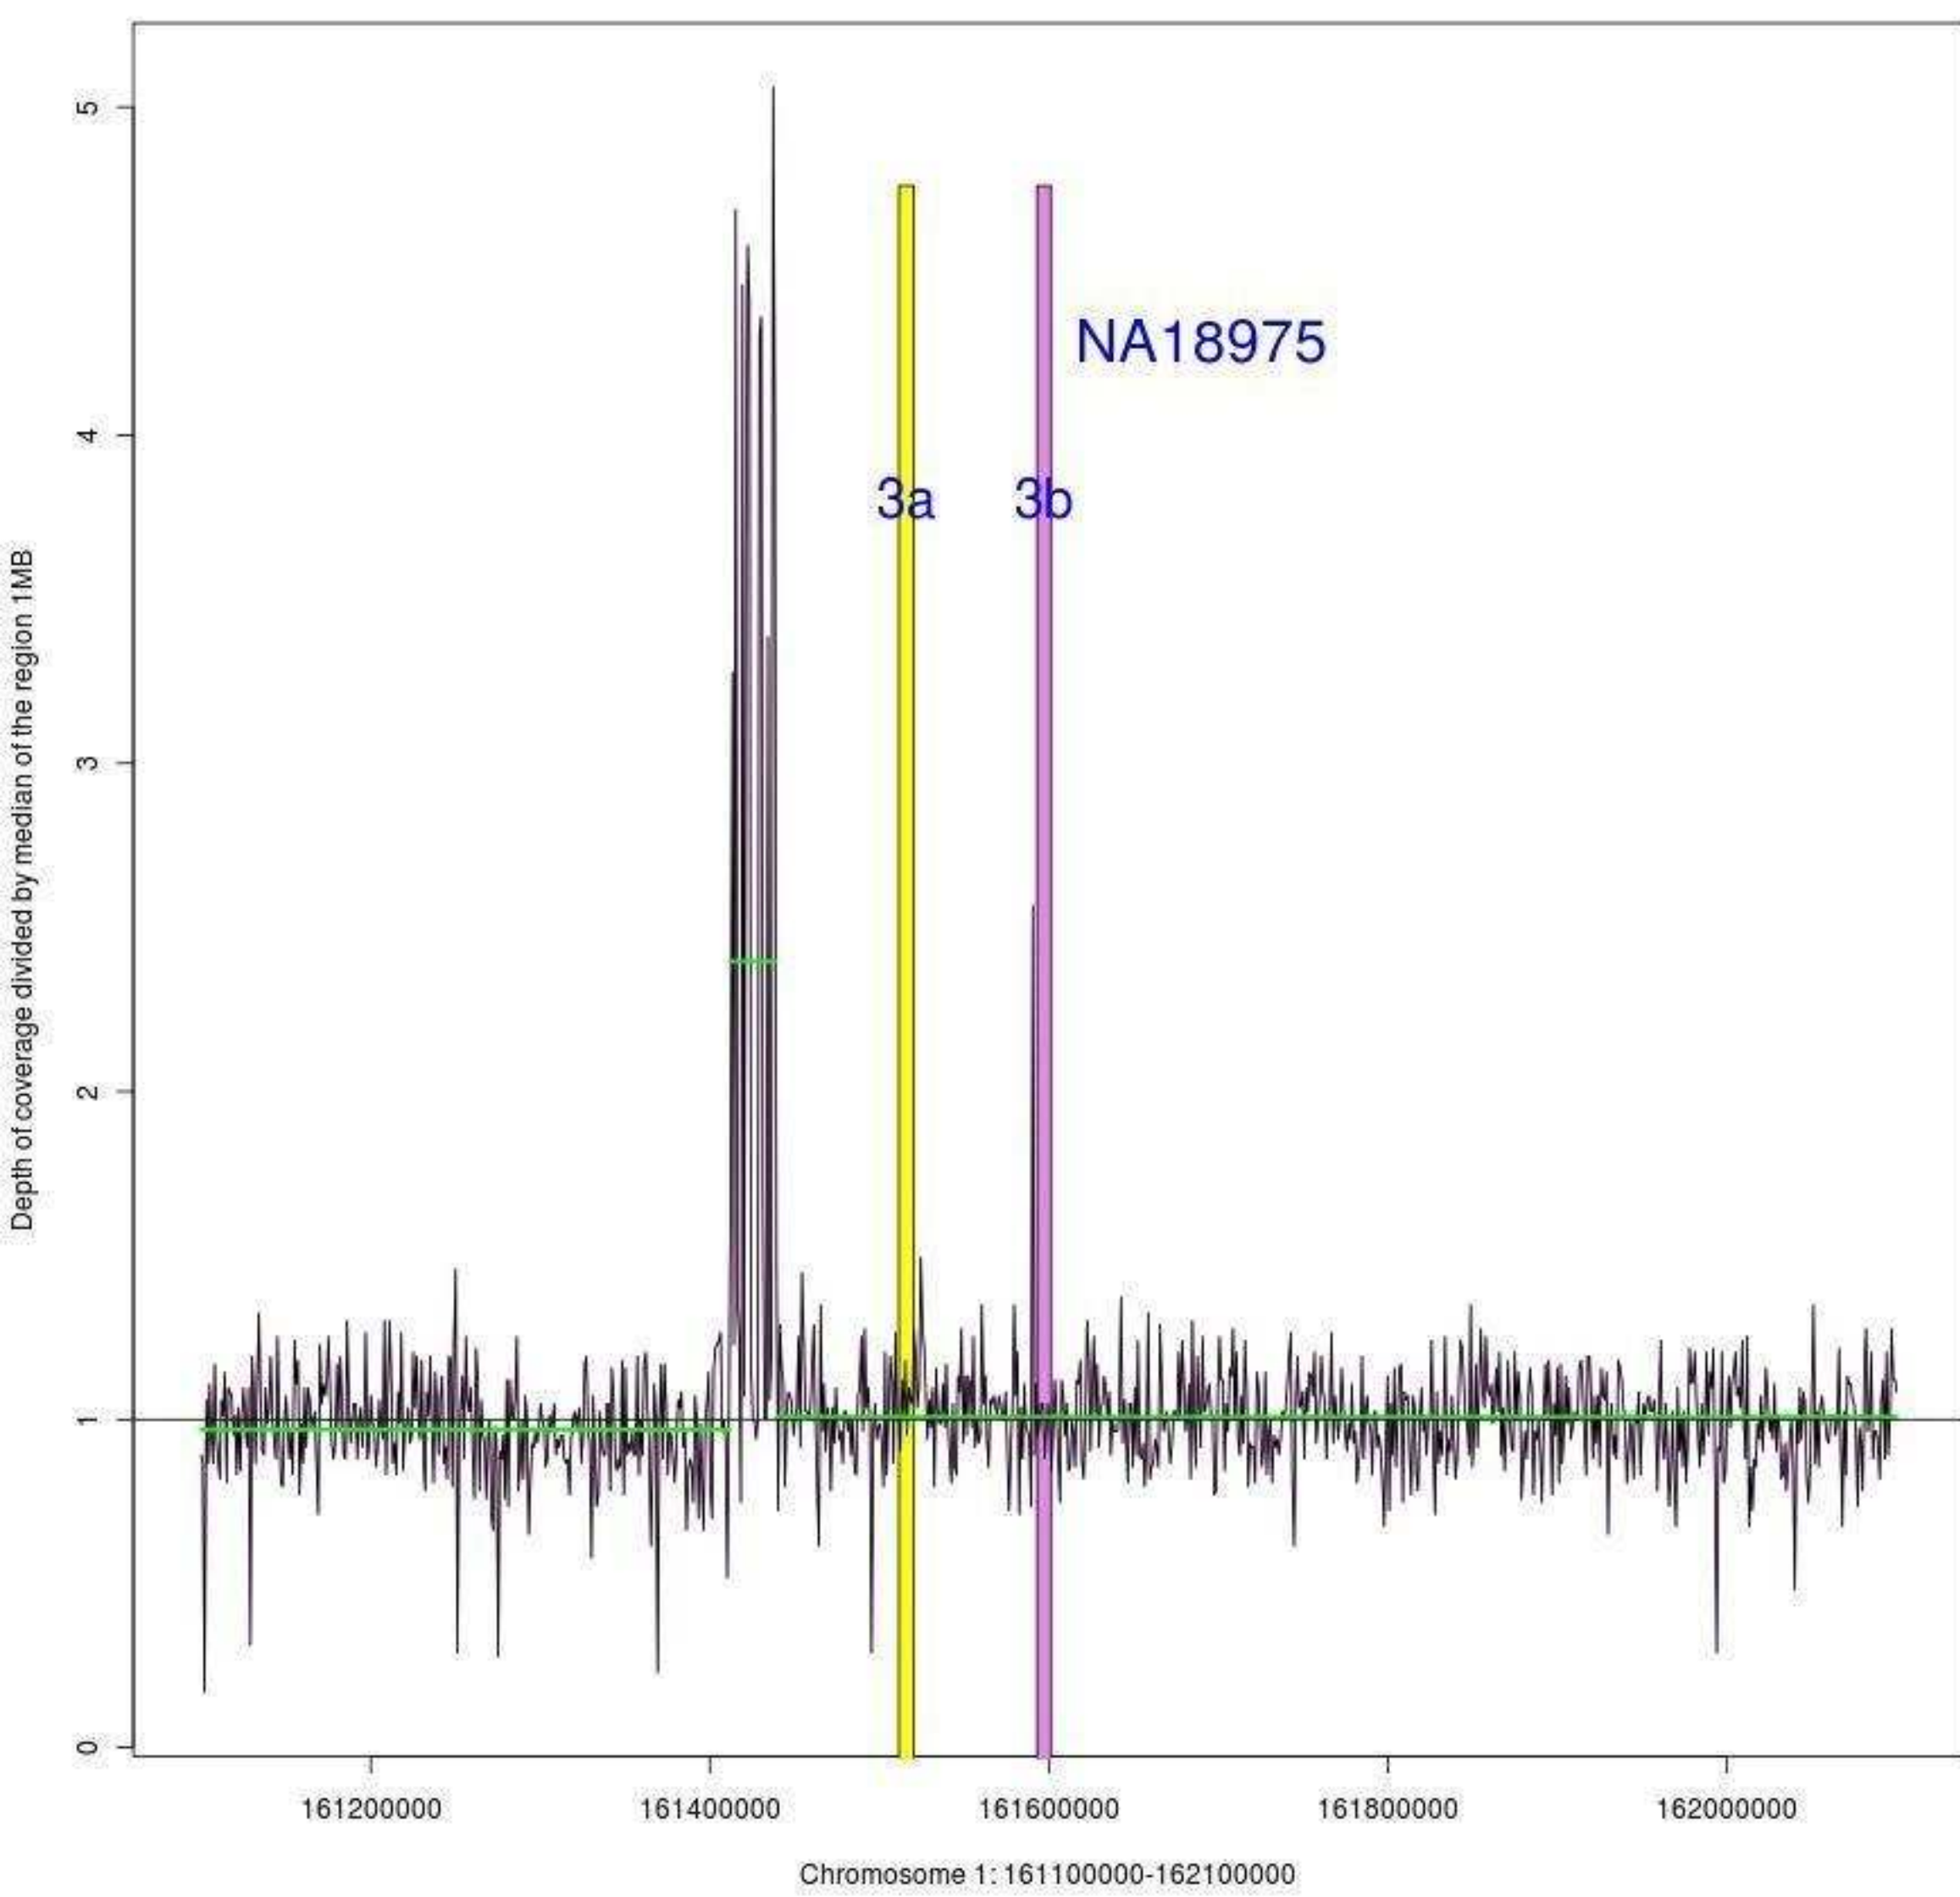

NA18975

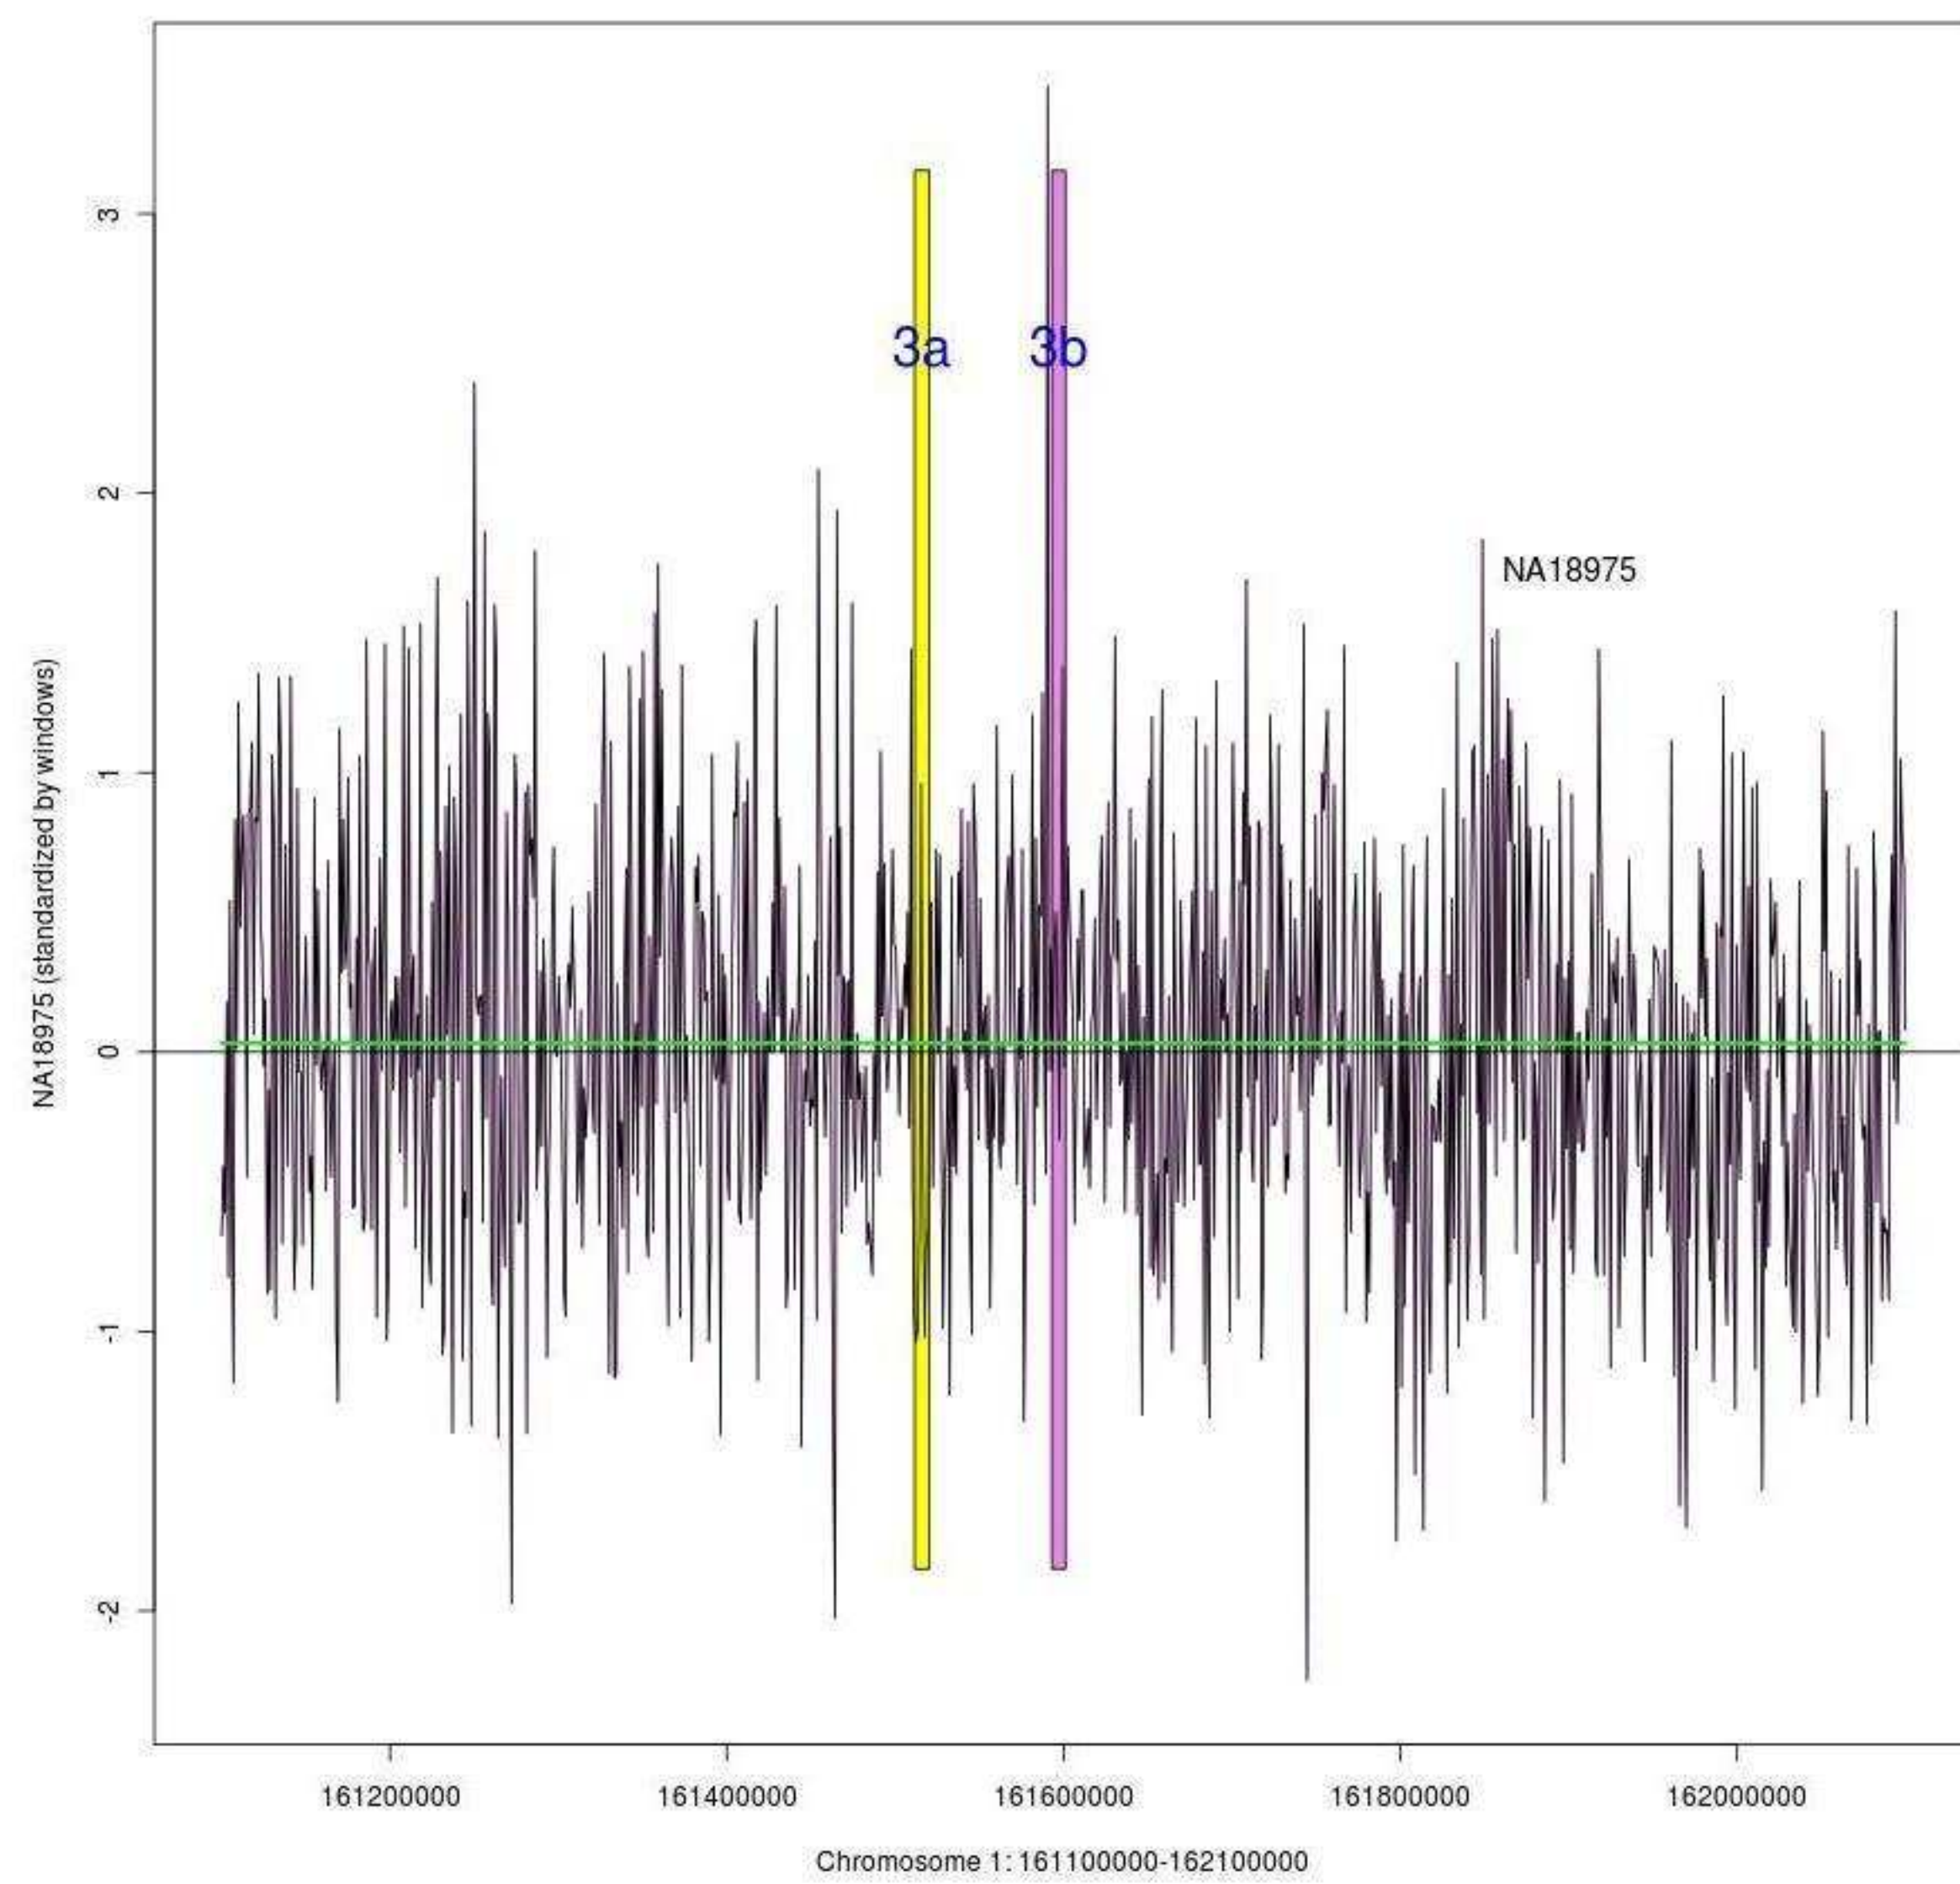



NA18976

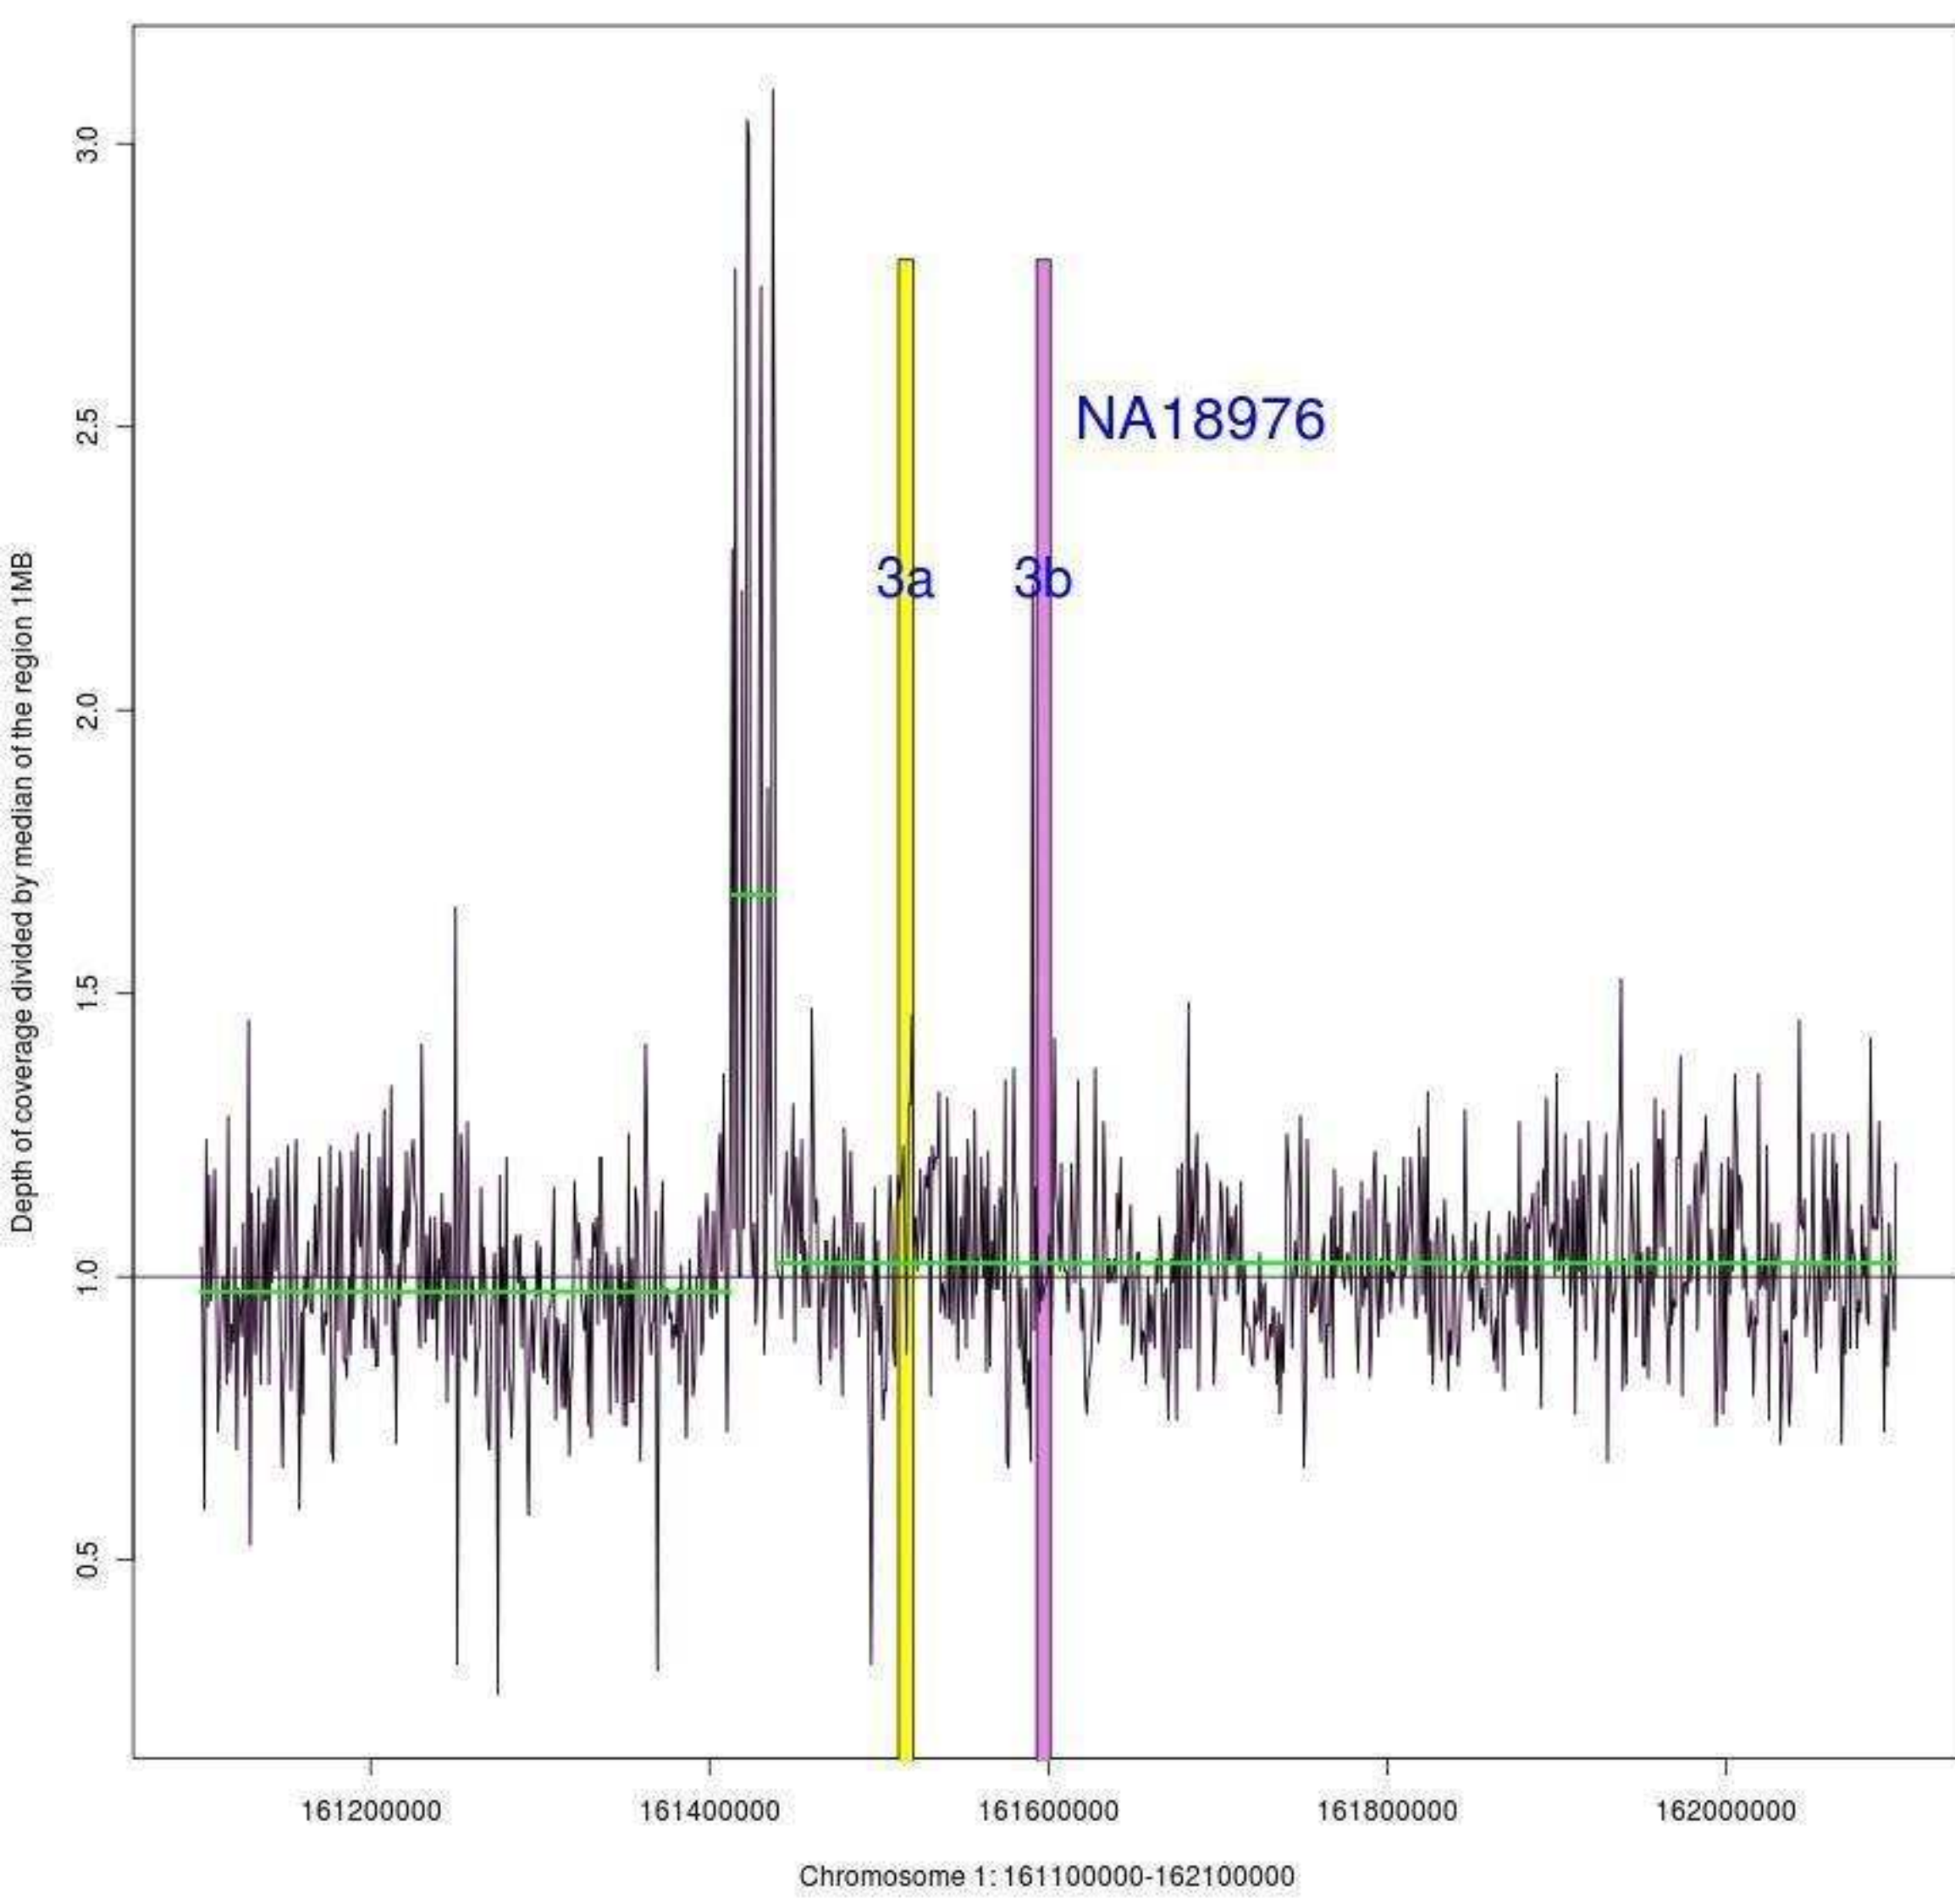

NA18976

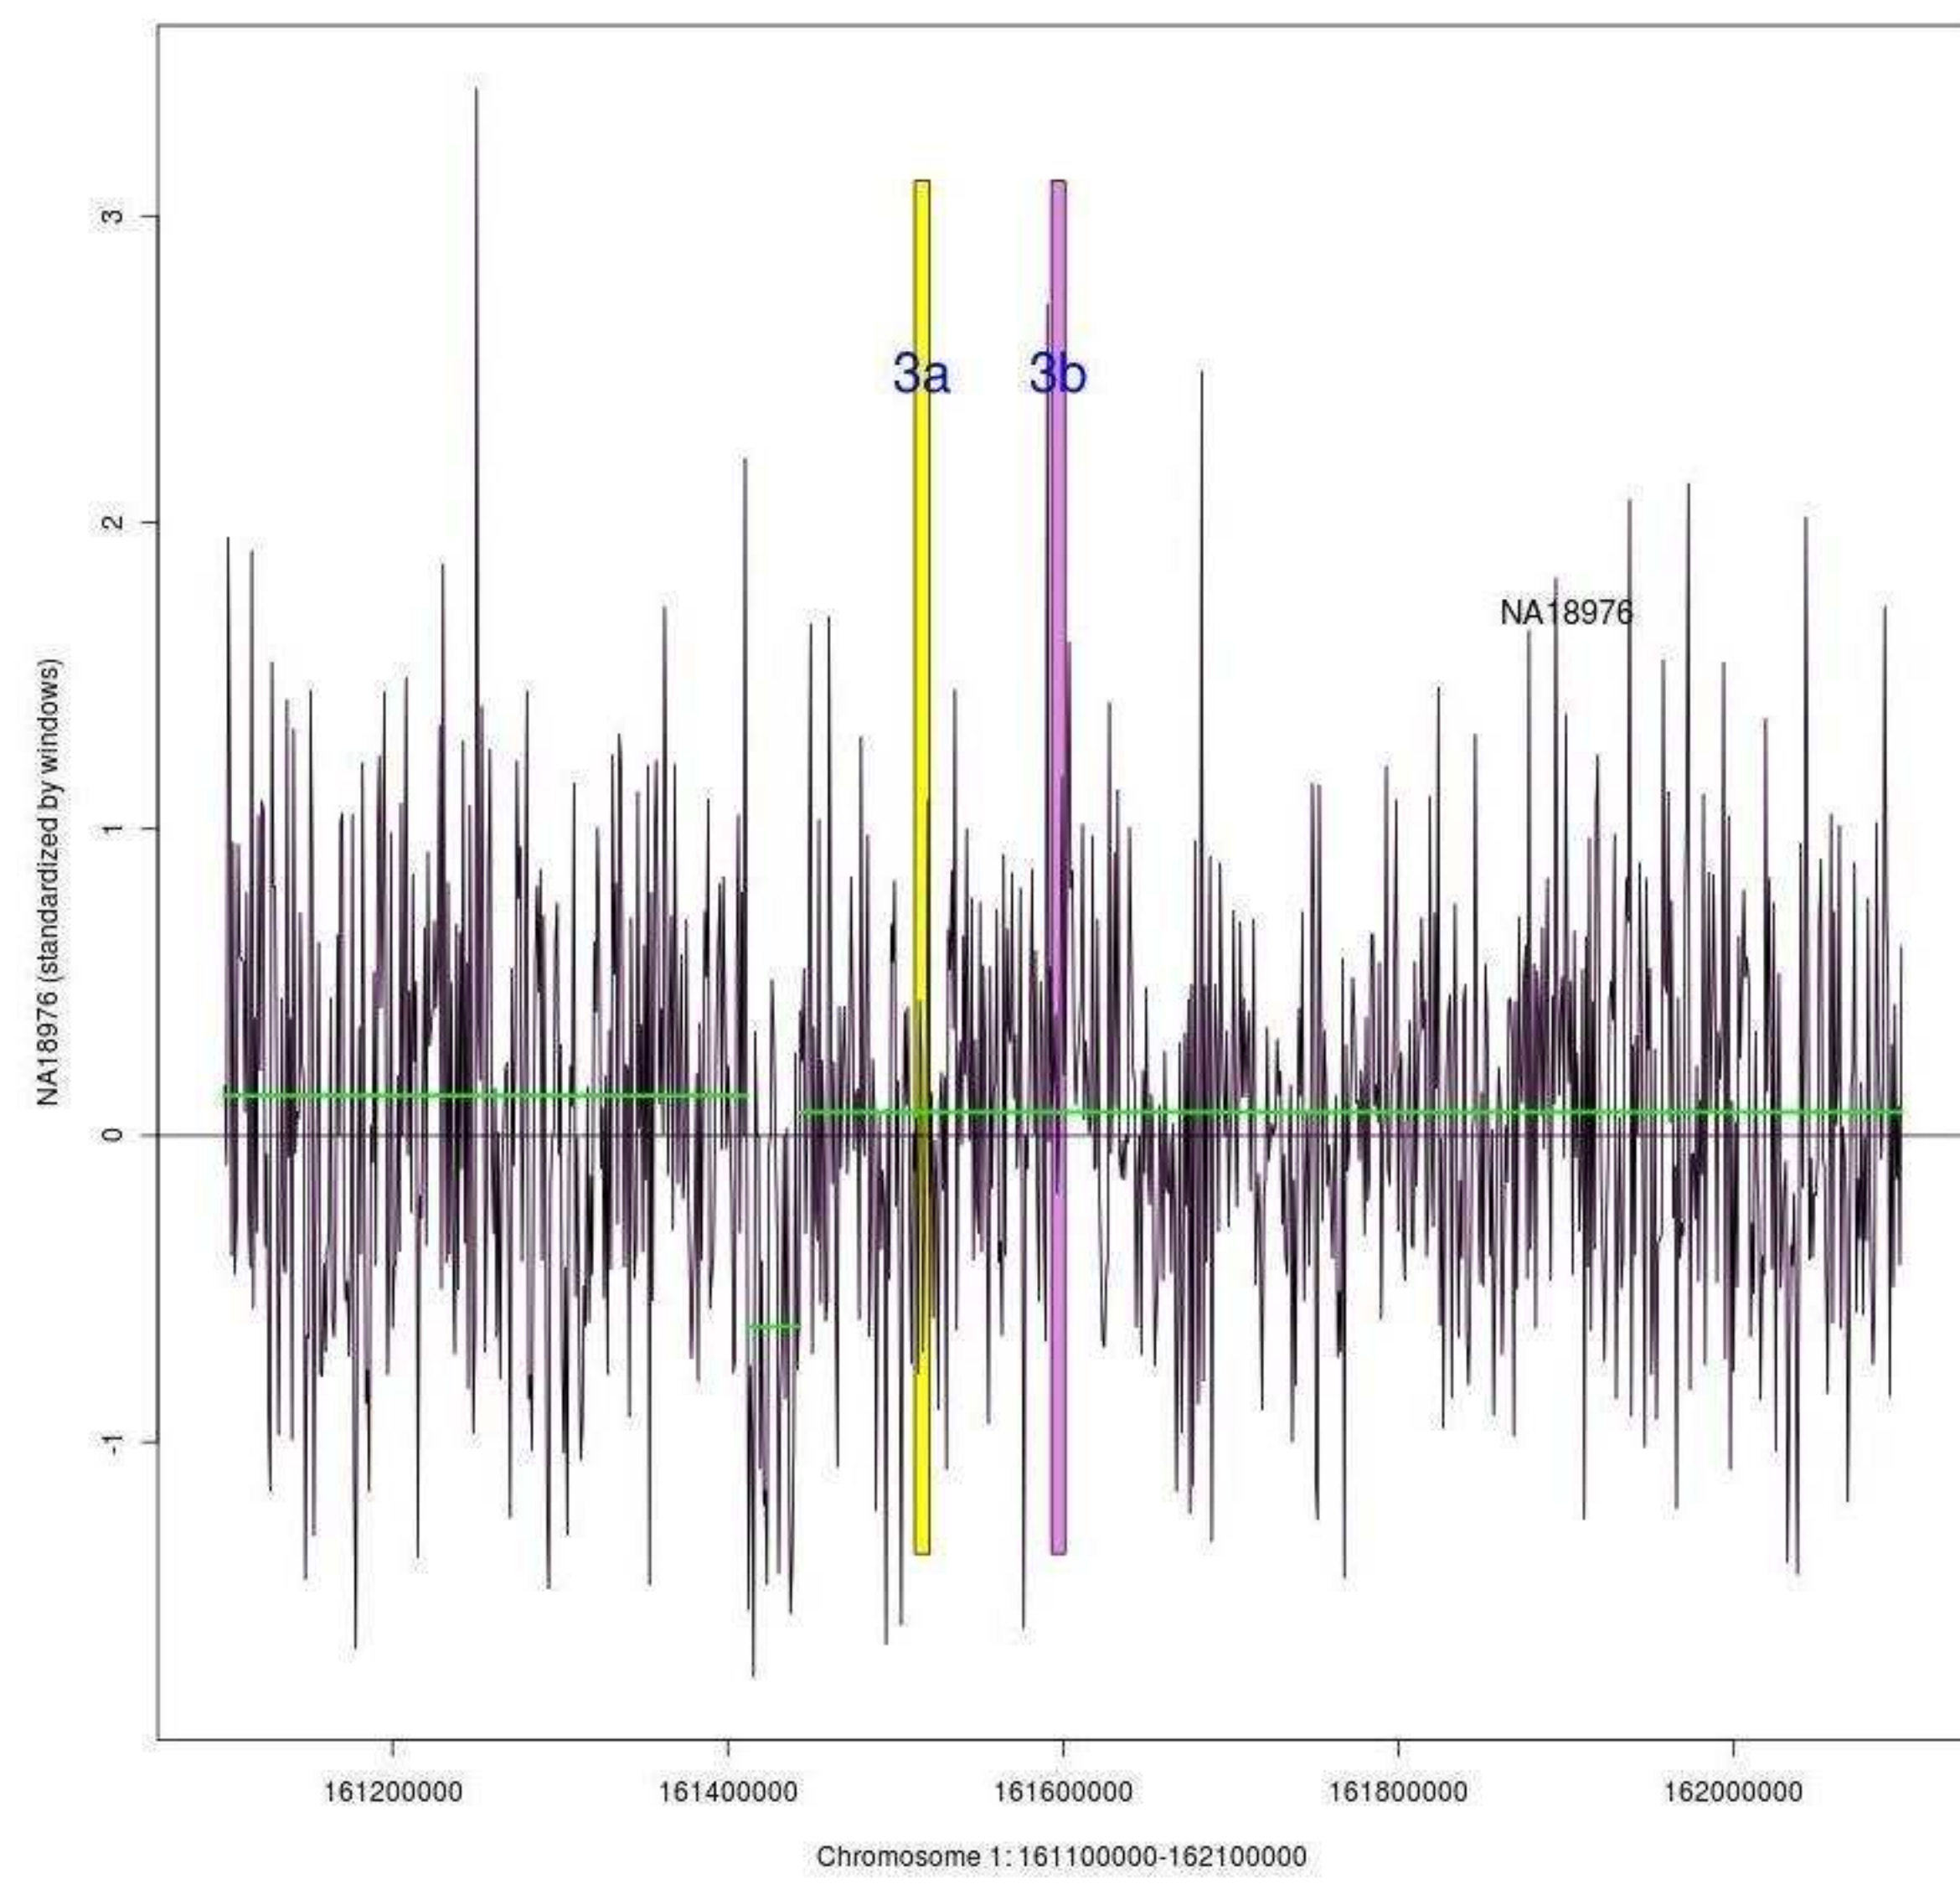

NA18981

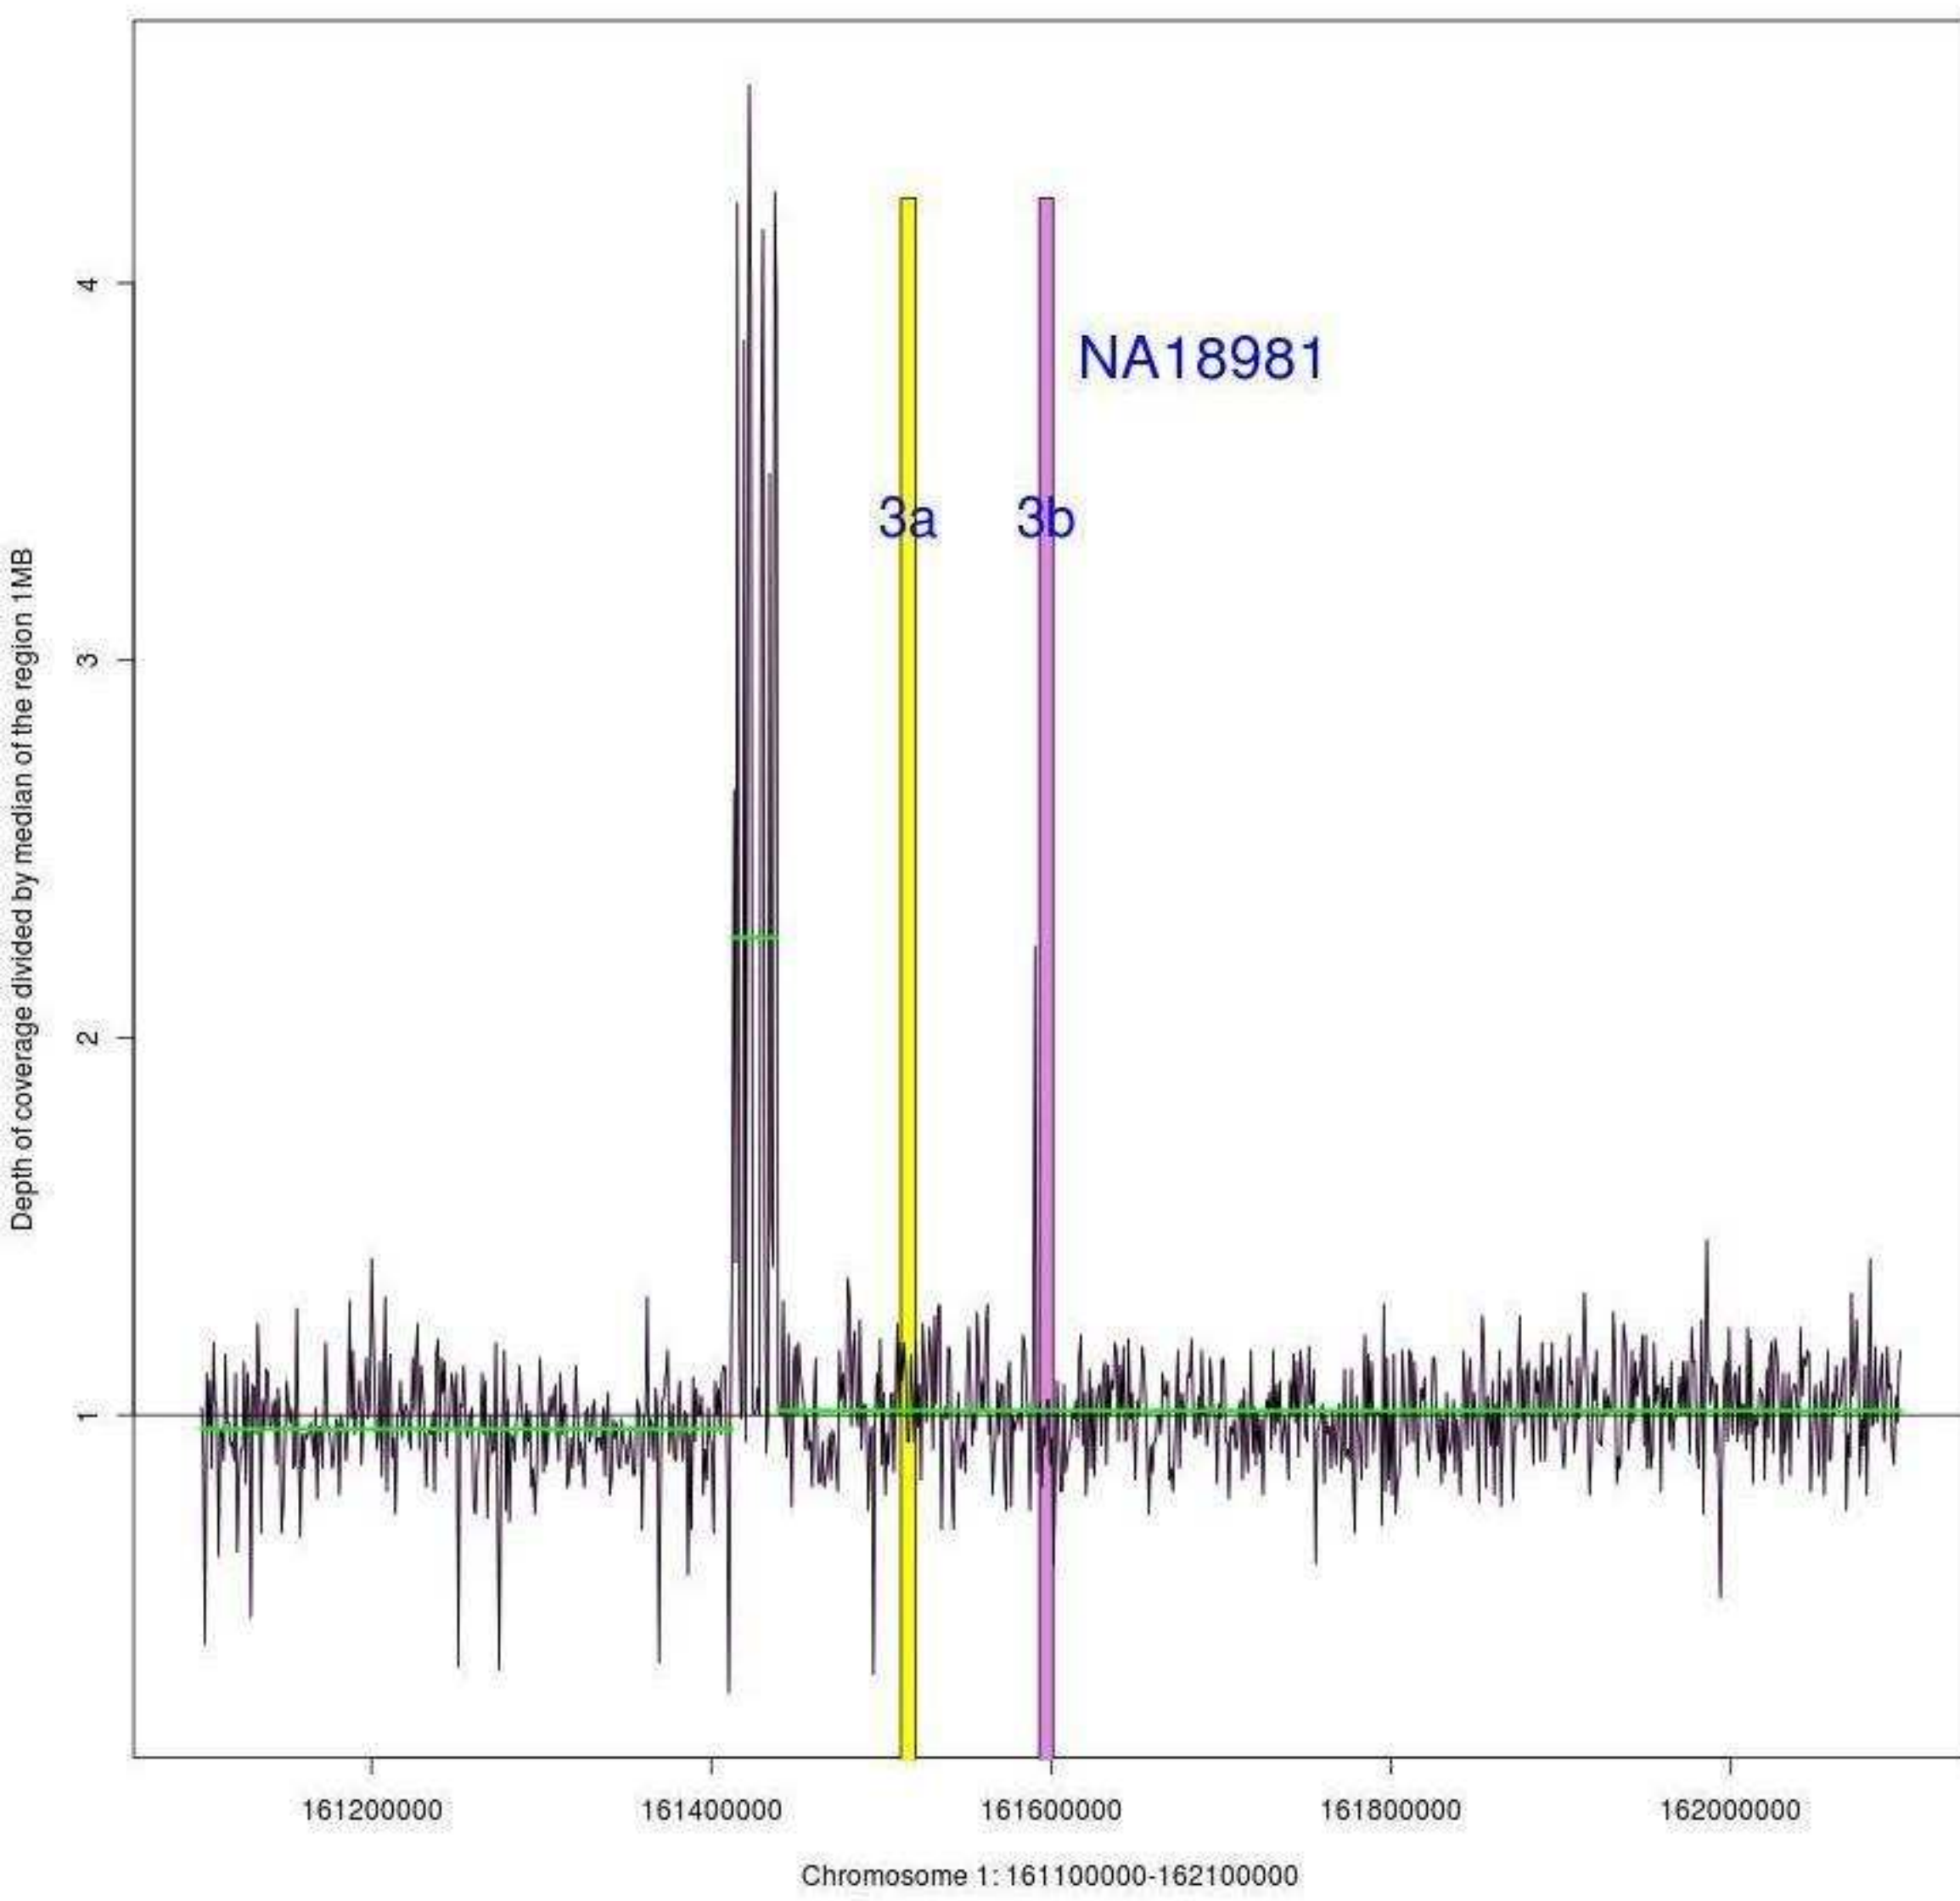

NA18981

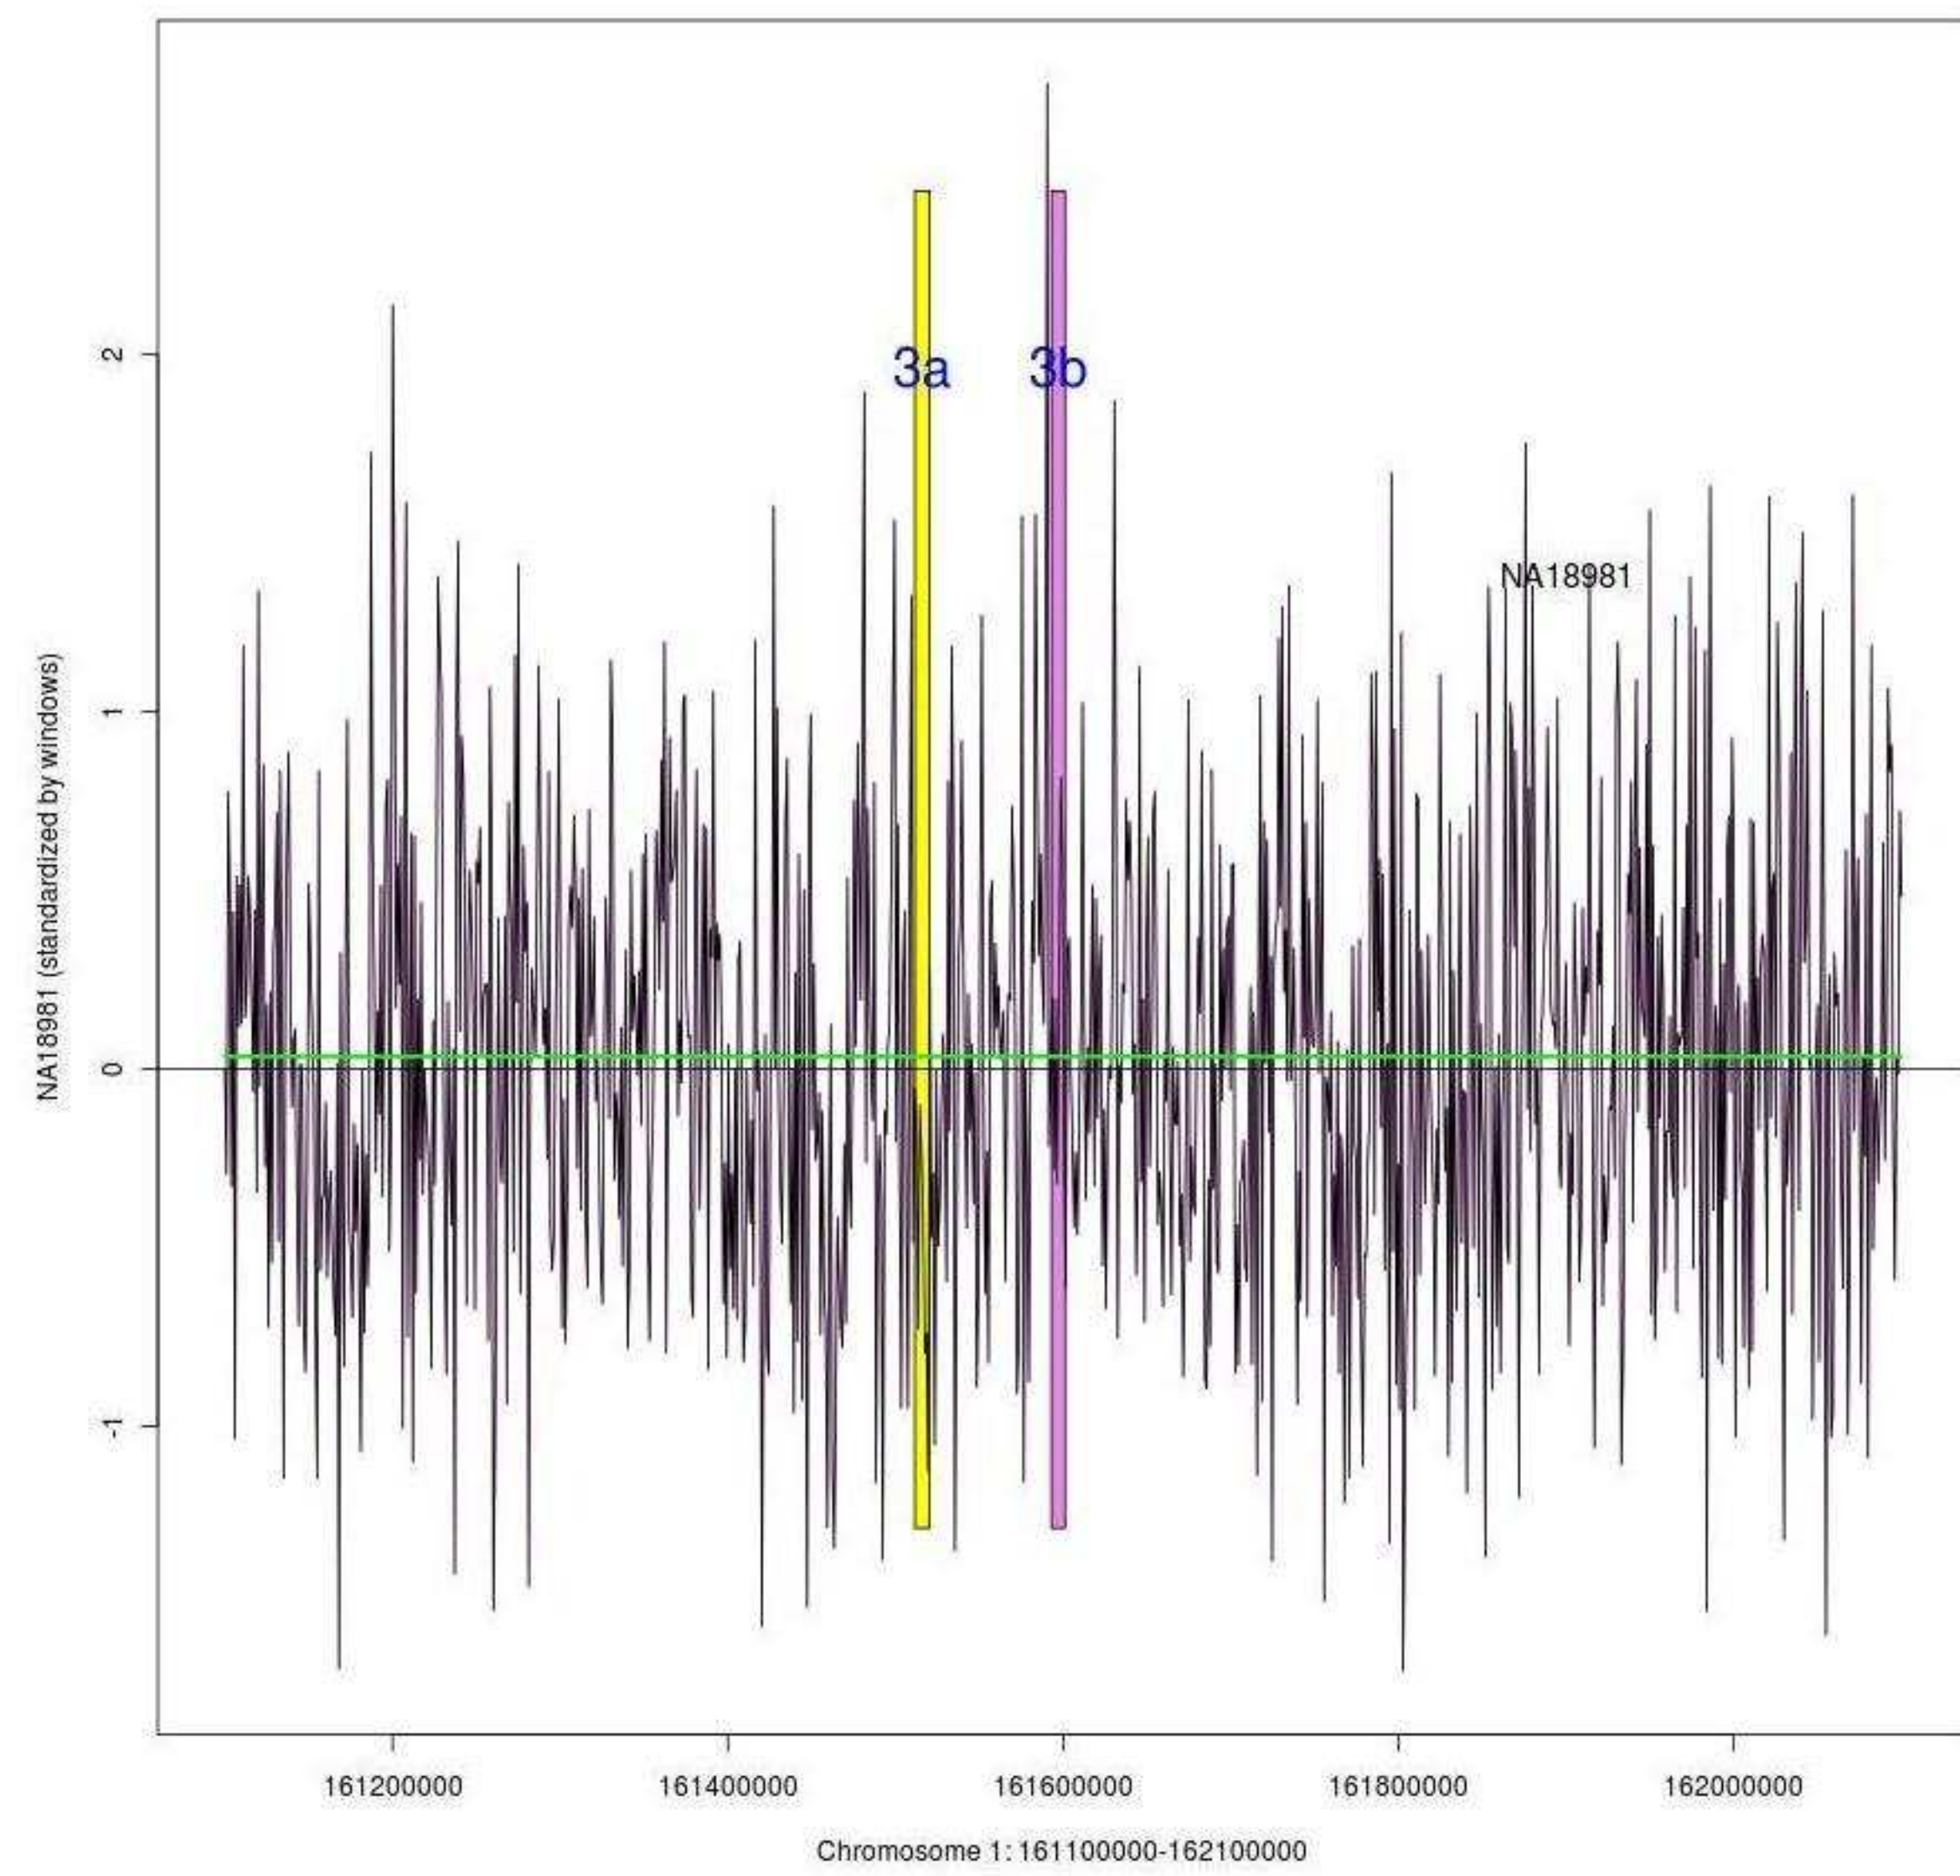

NA18987

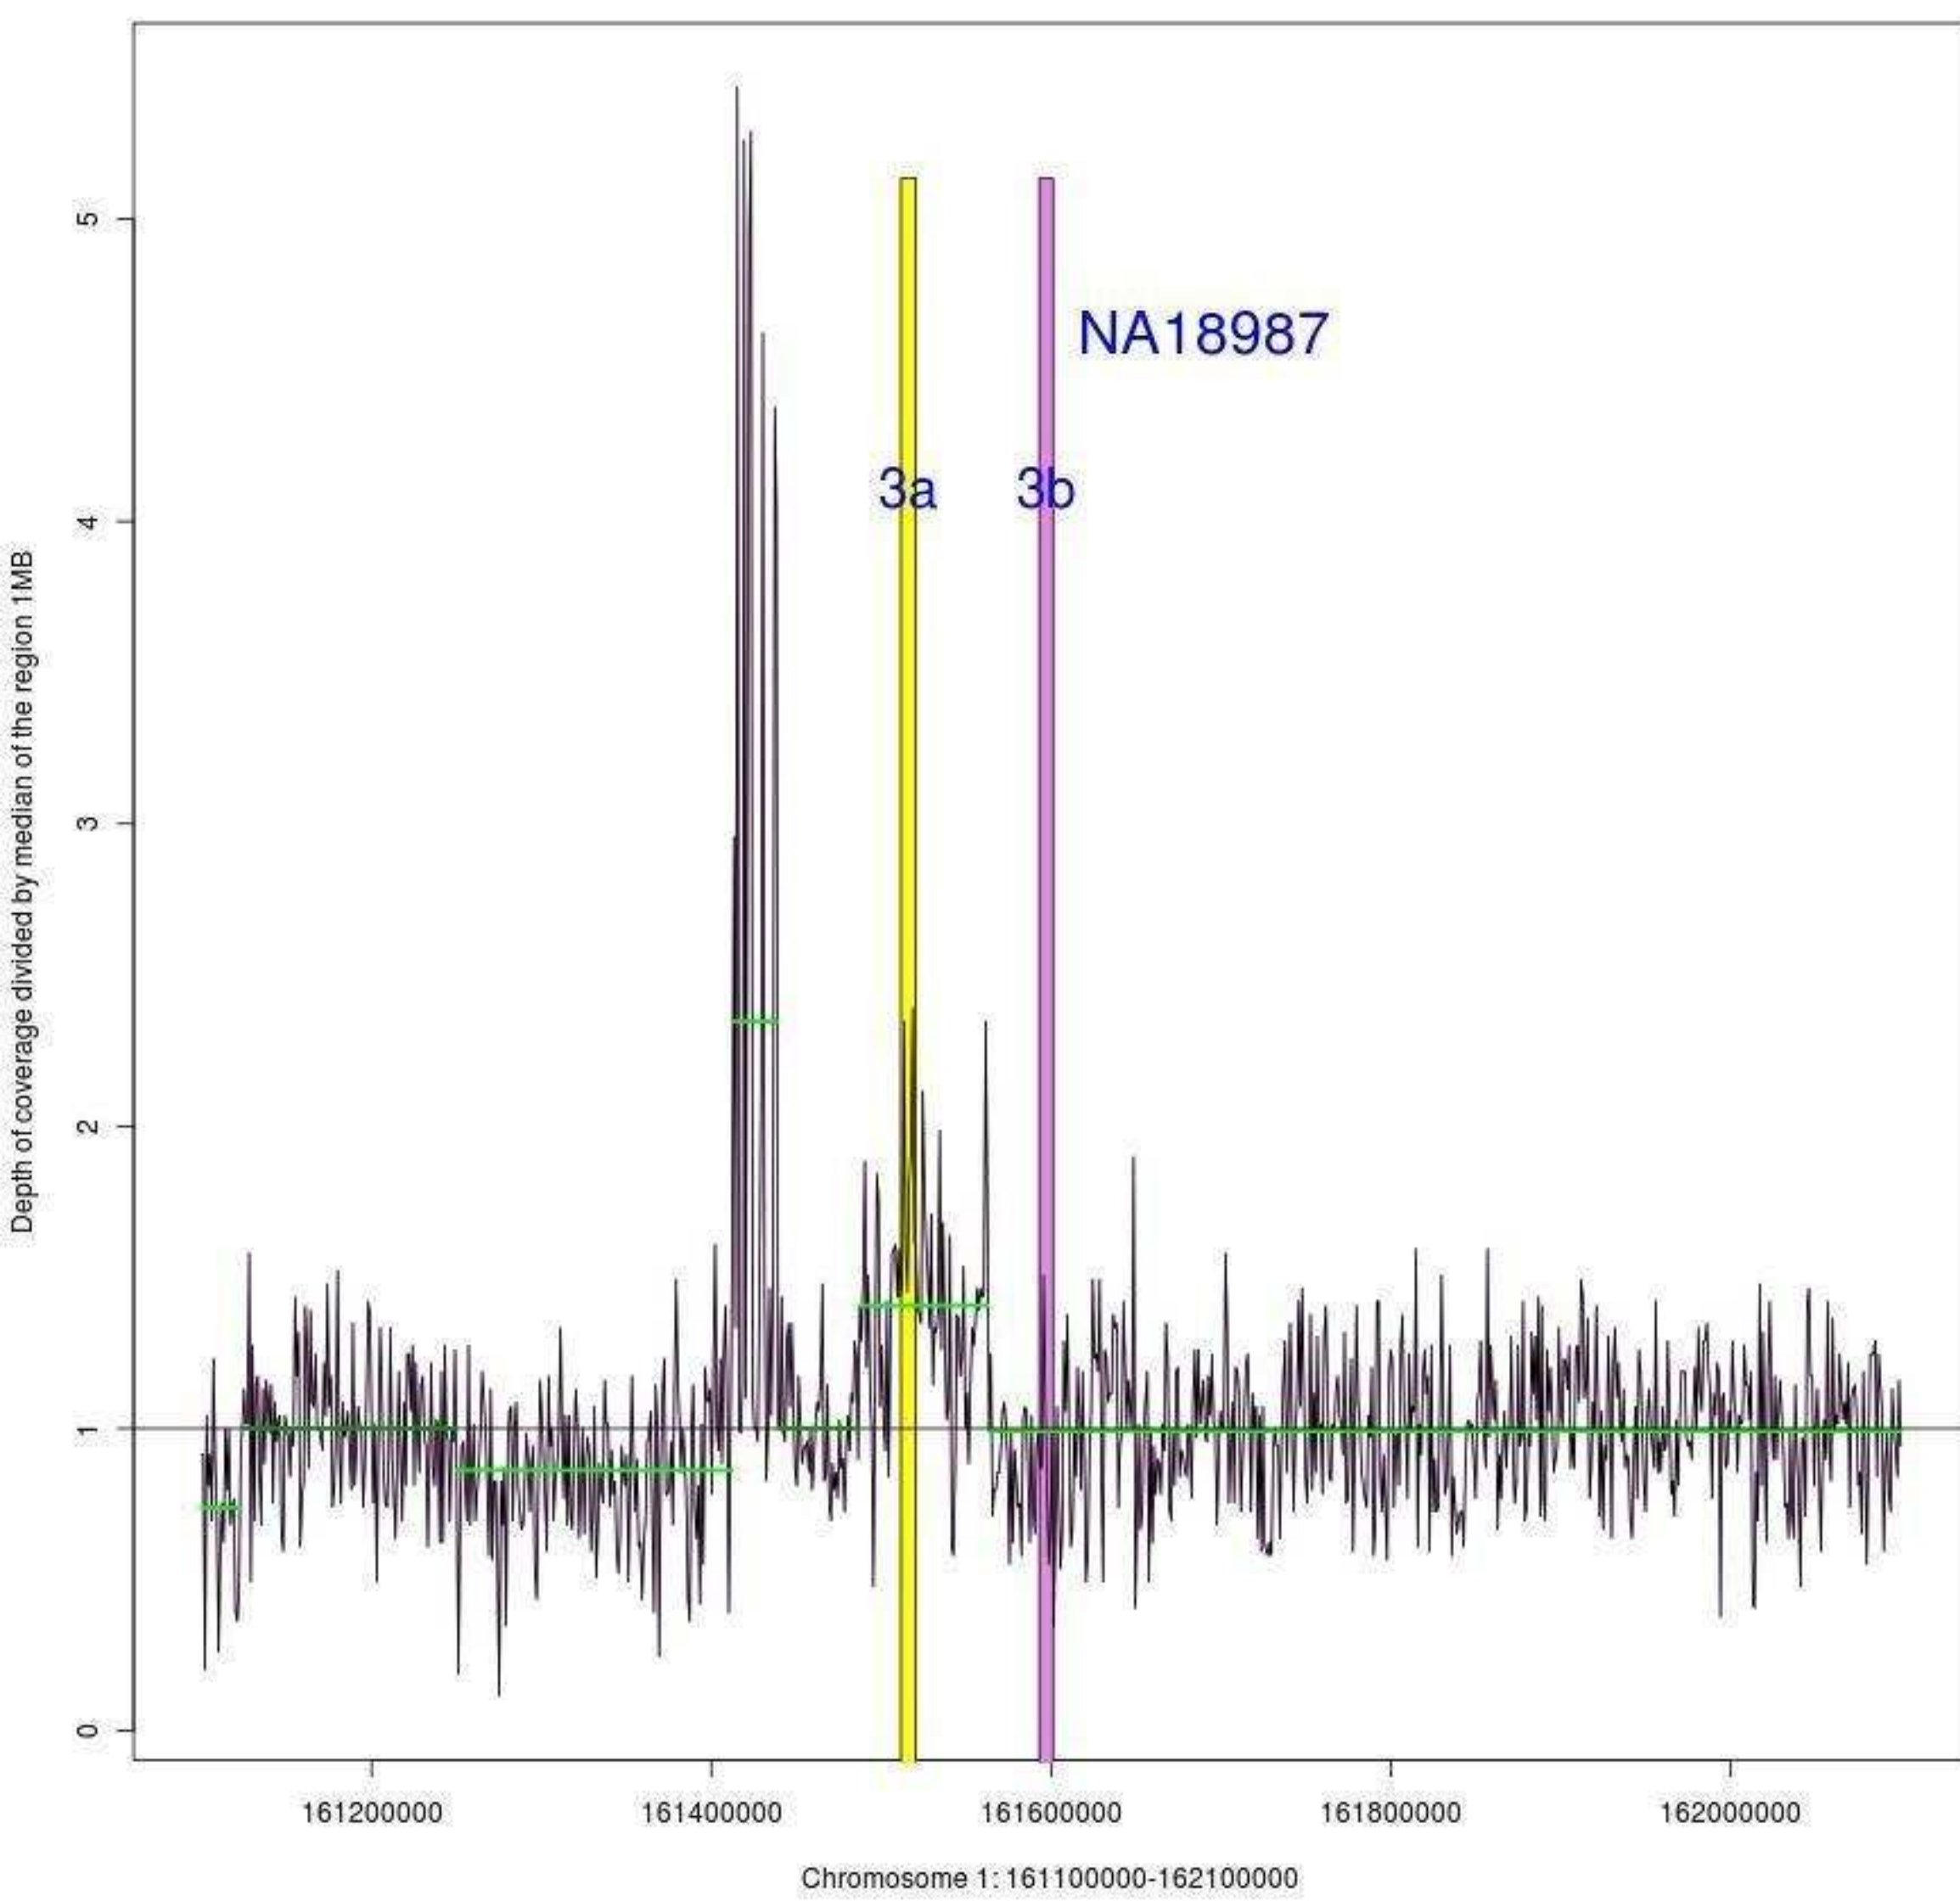

NA18987

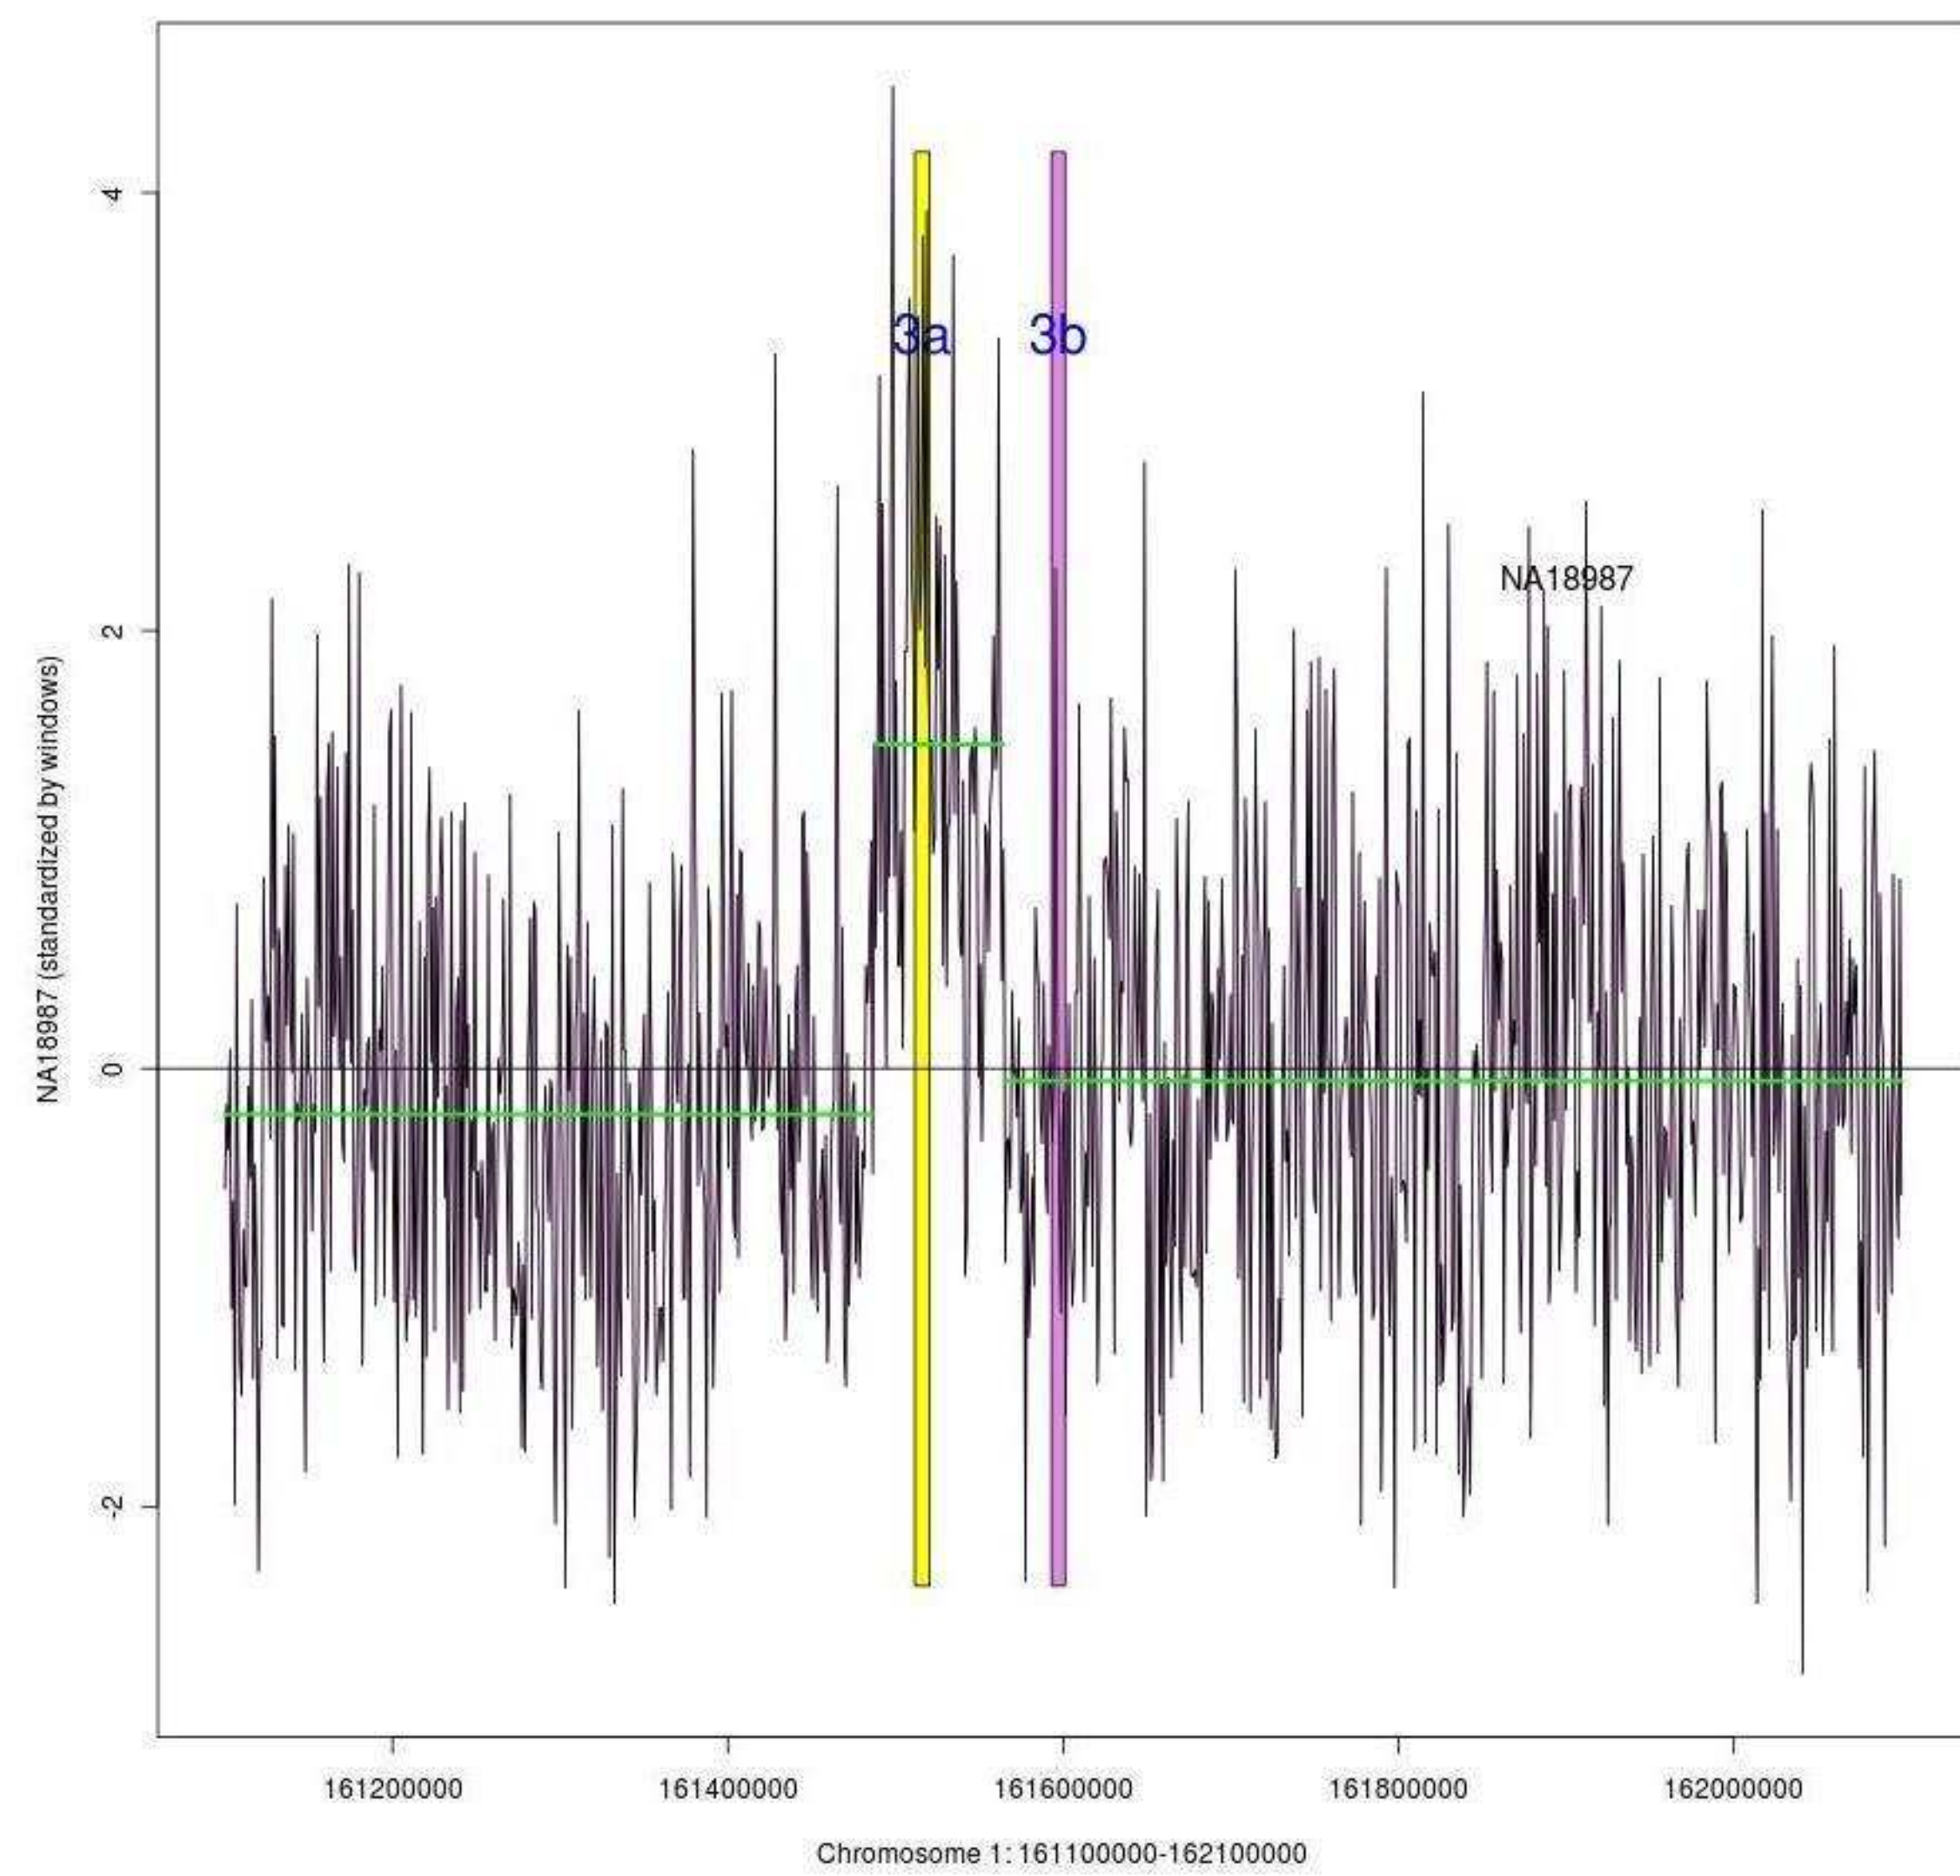



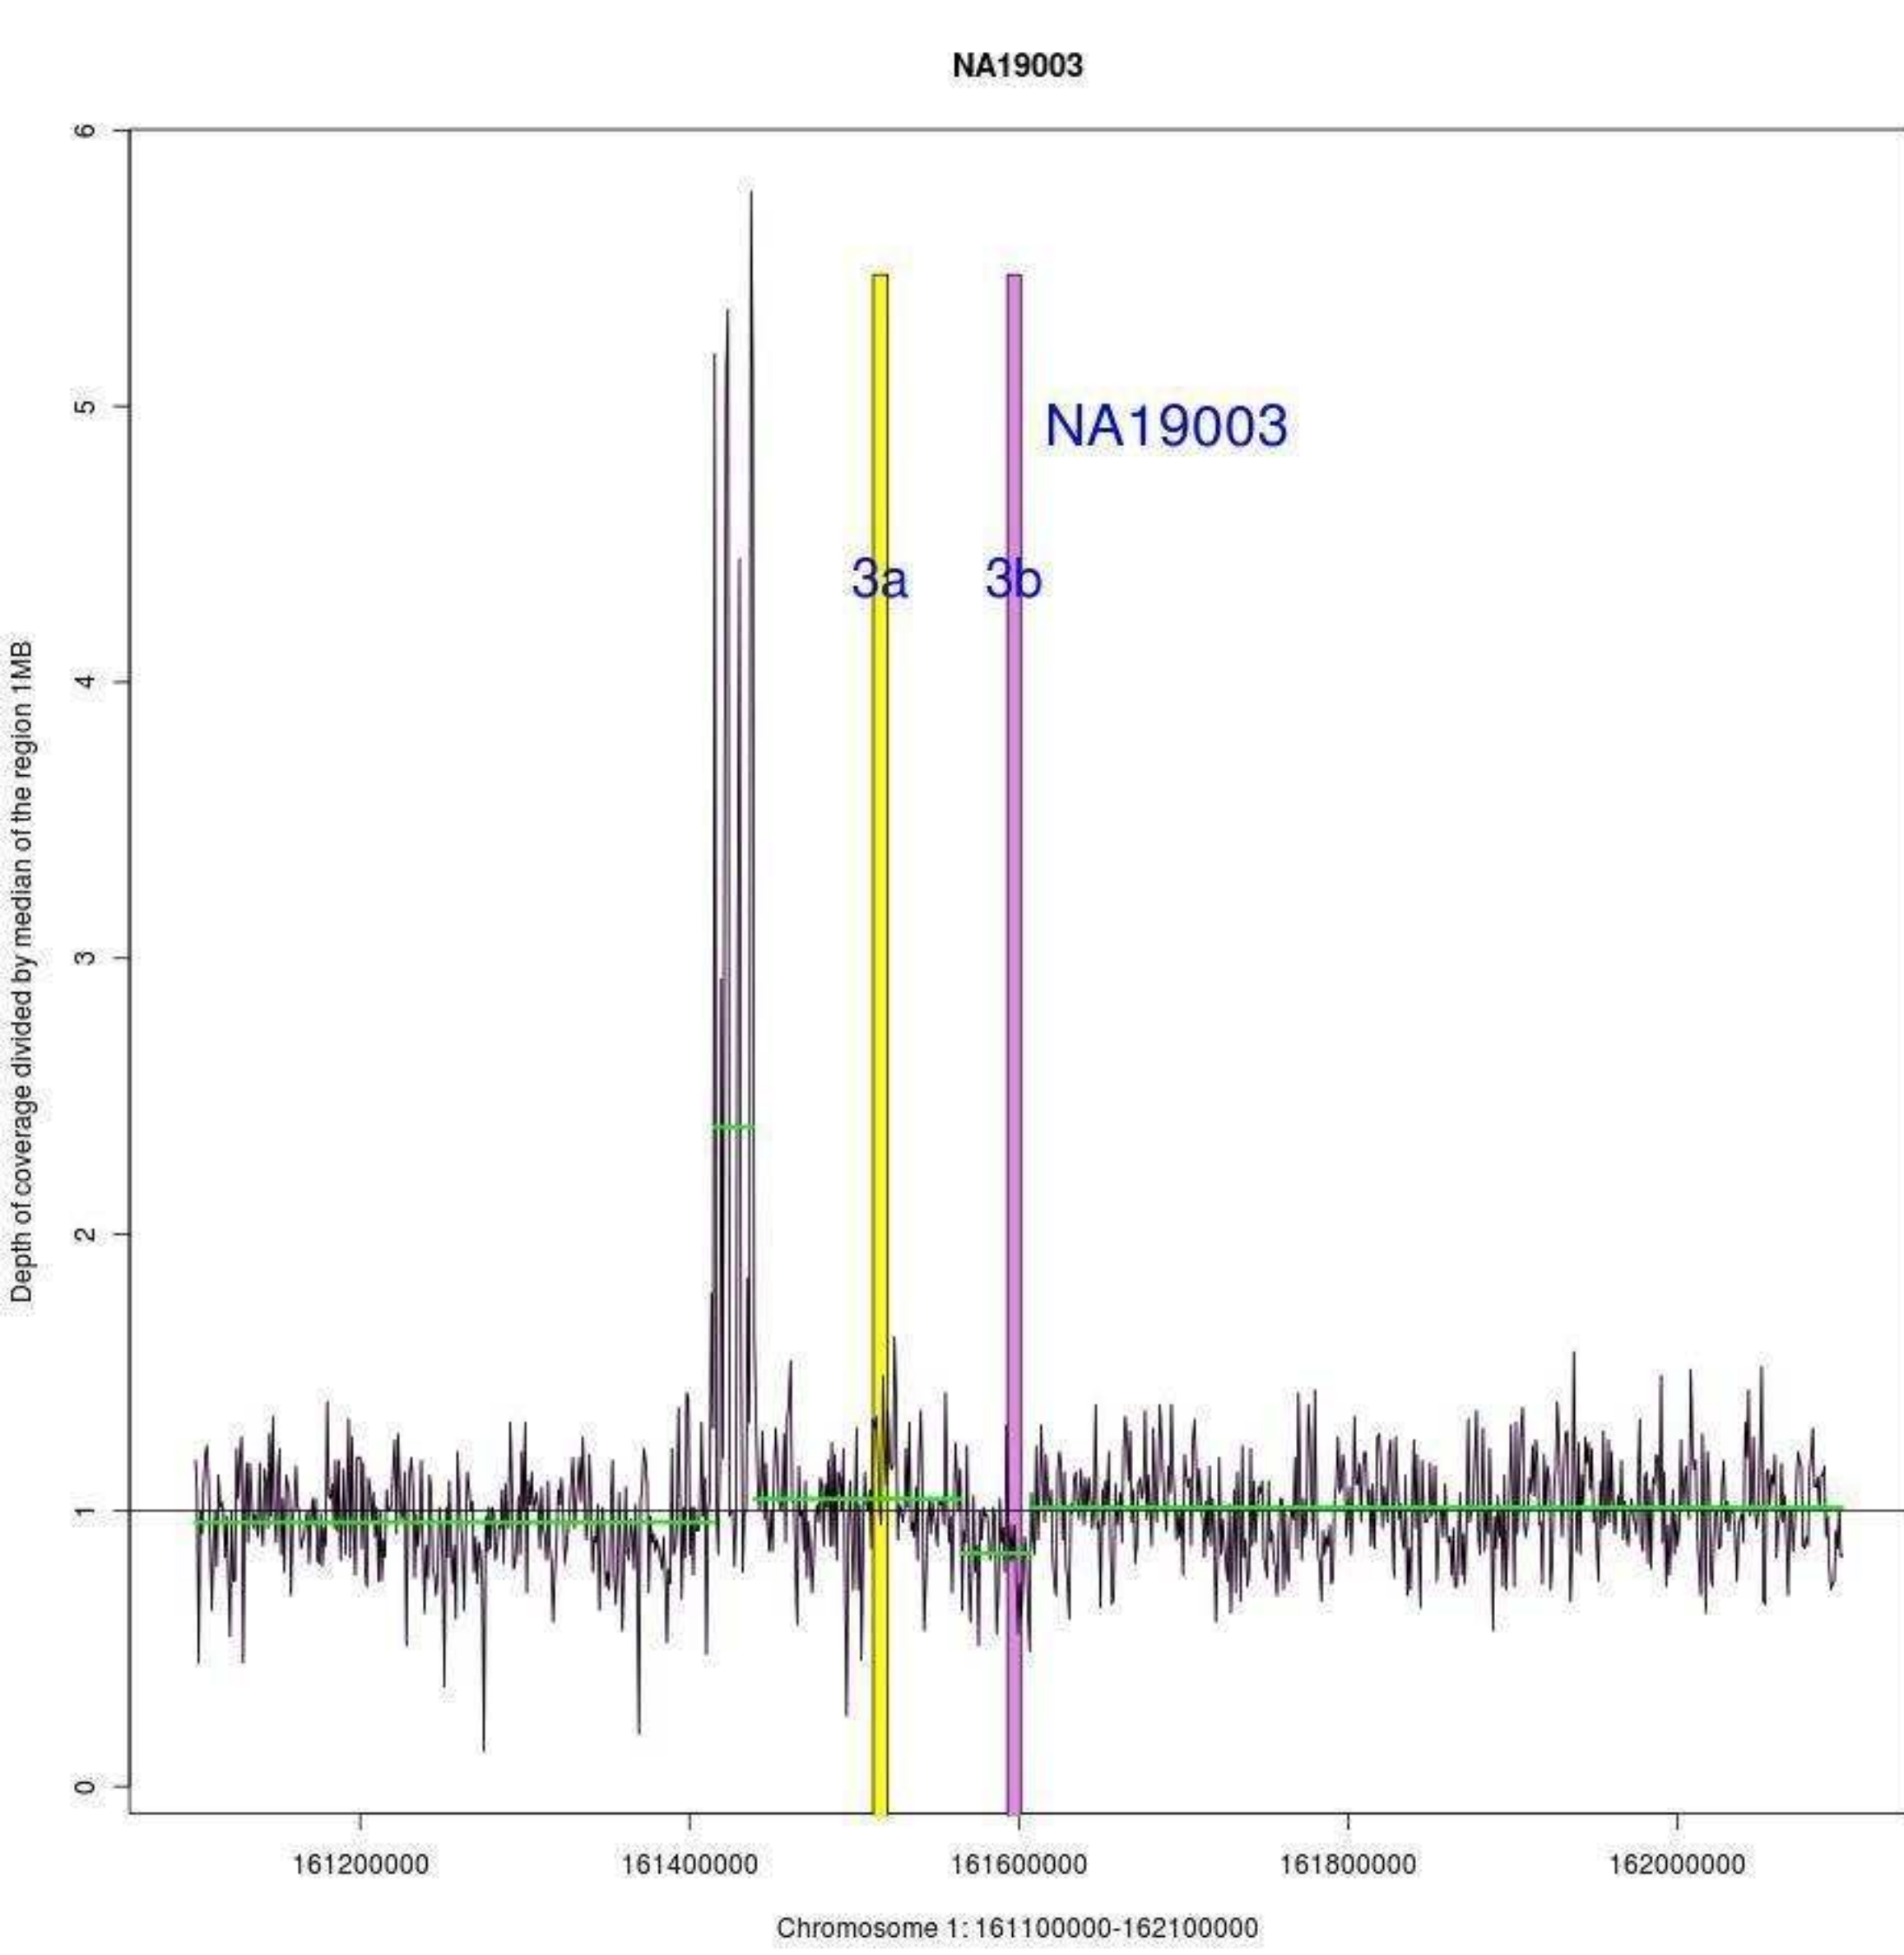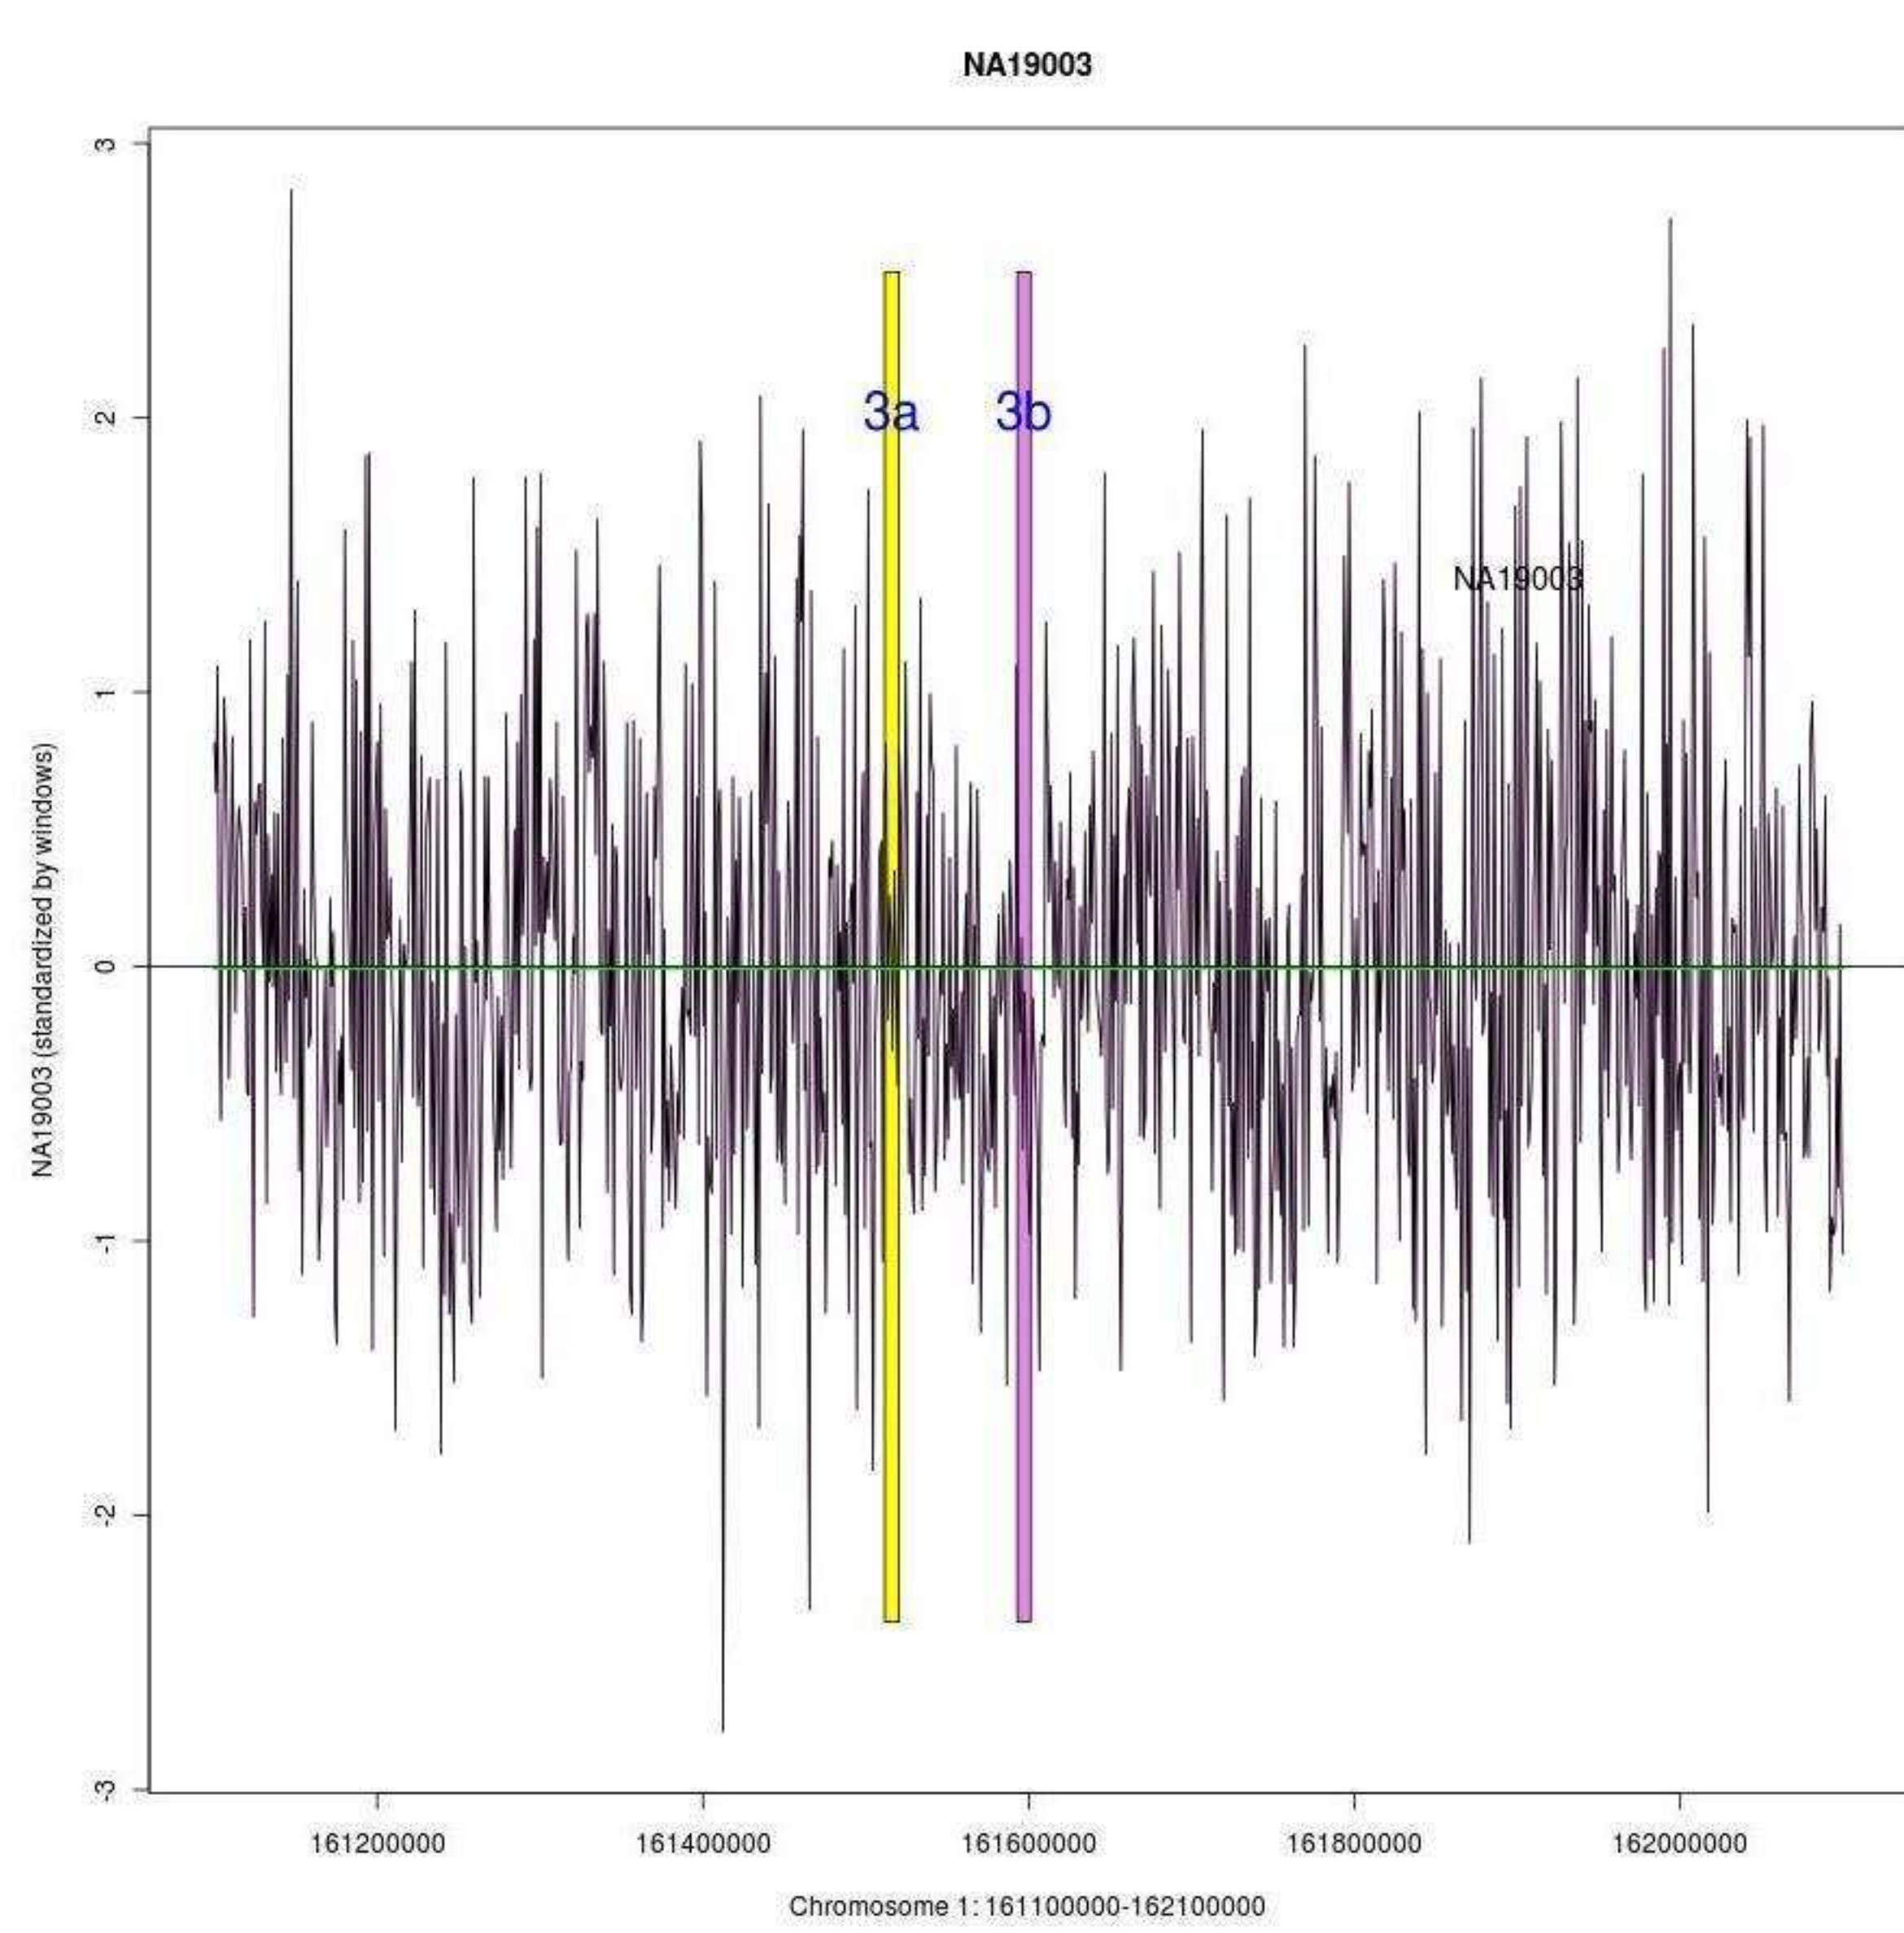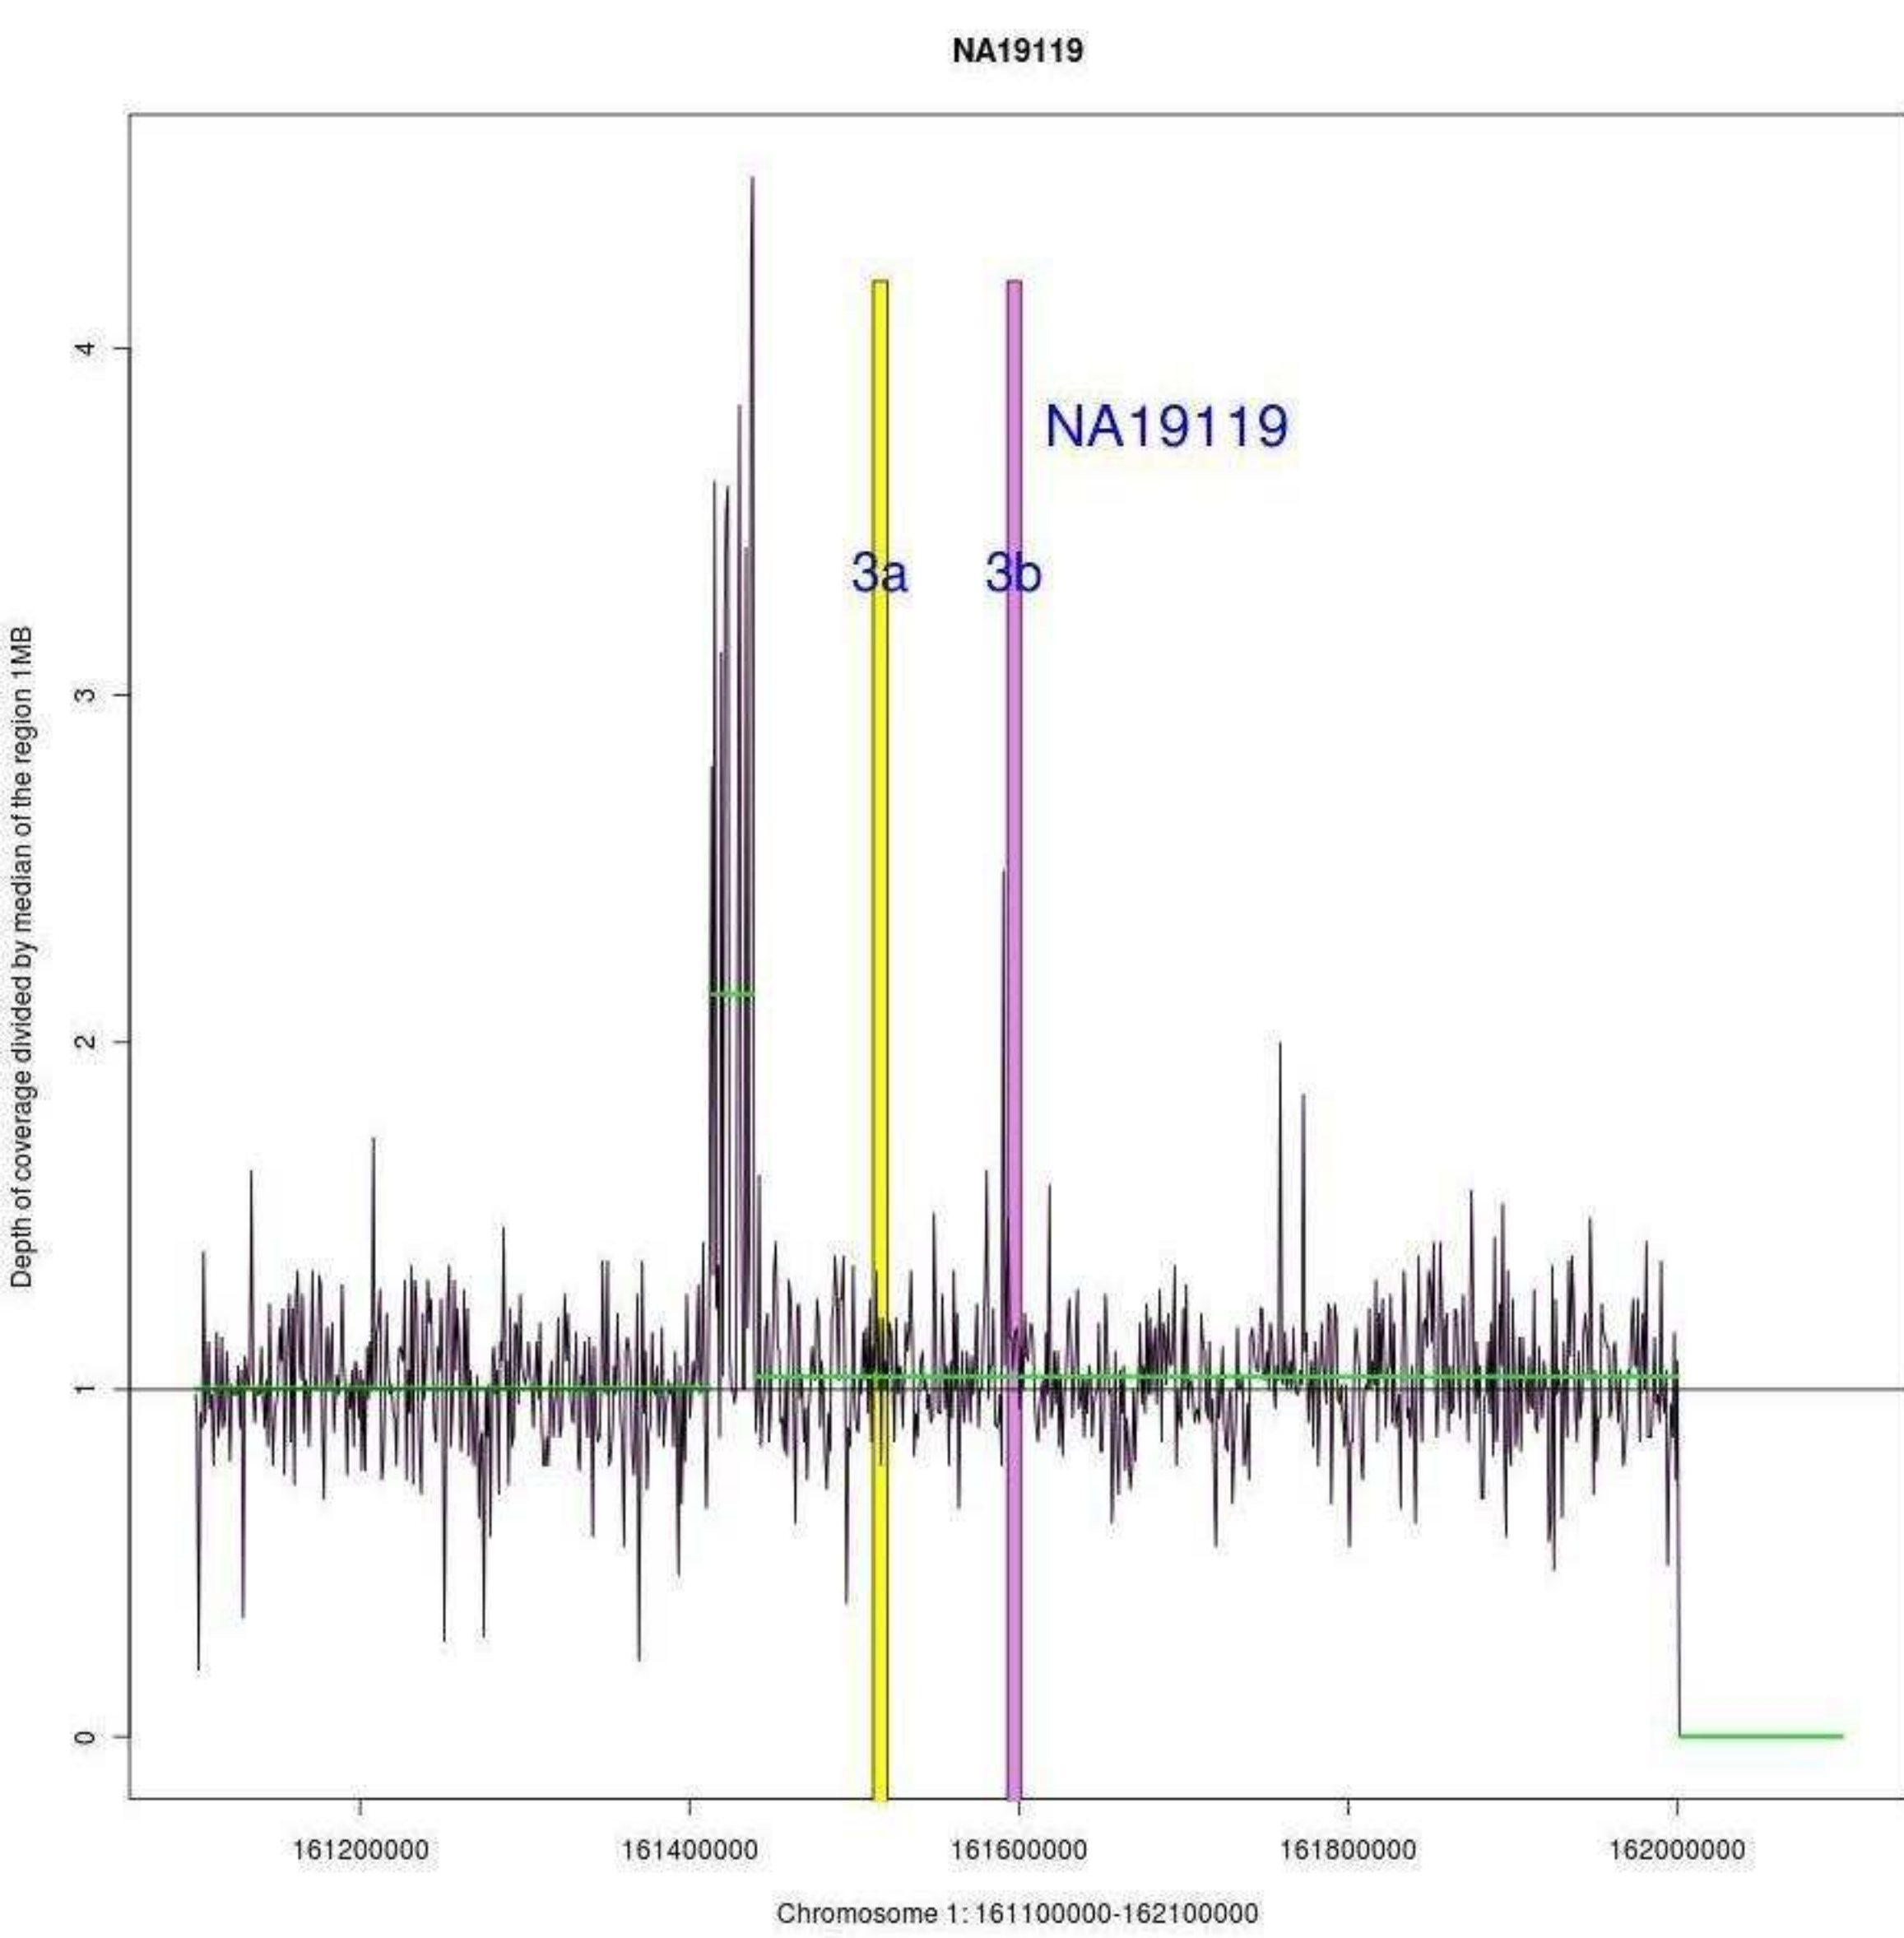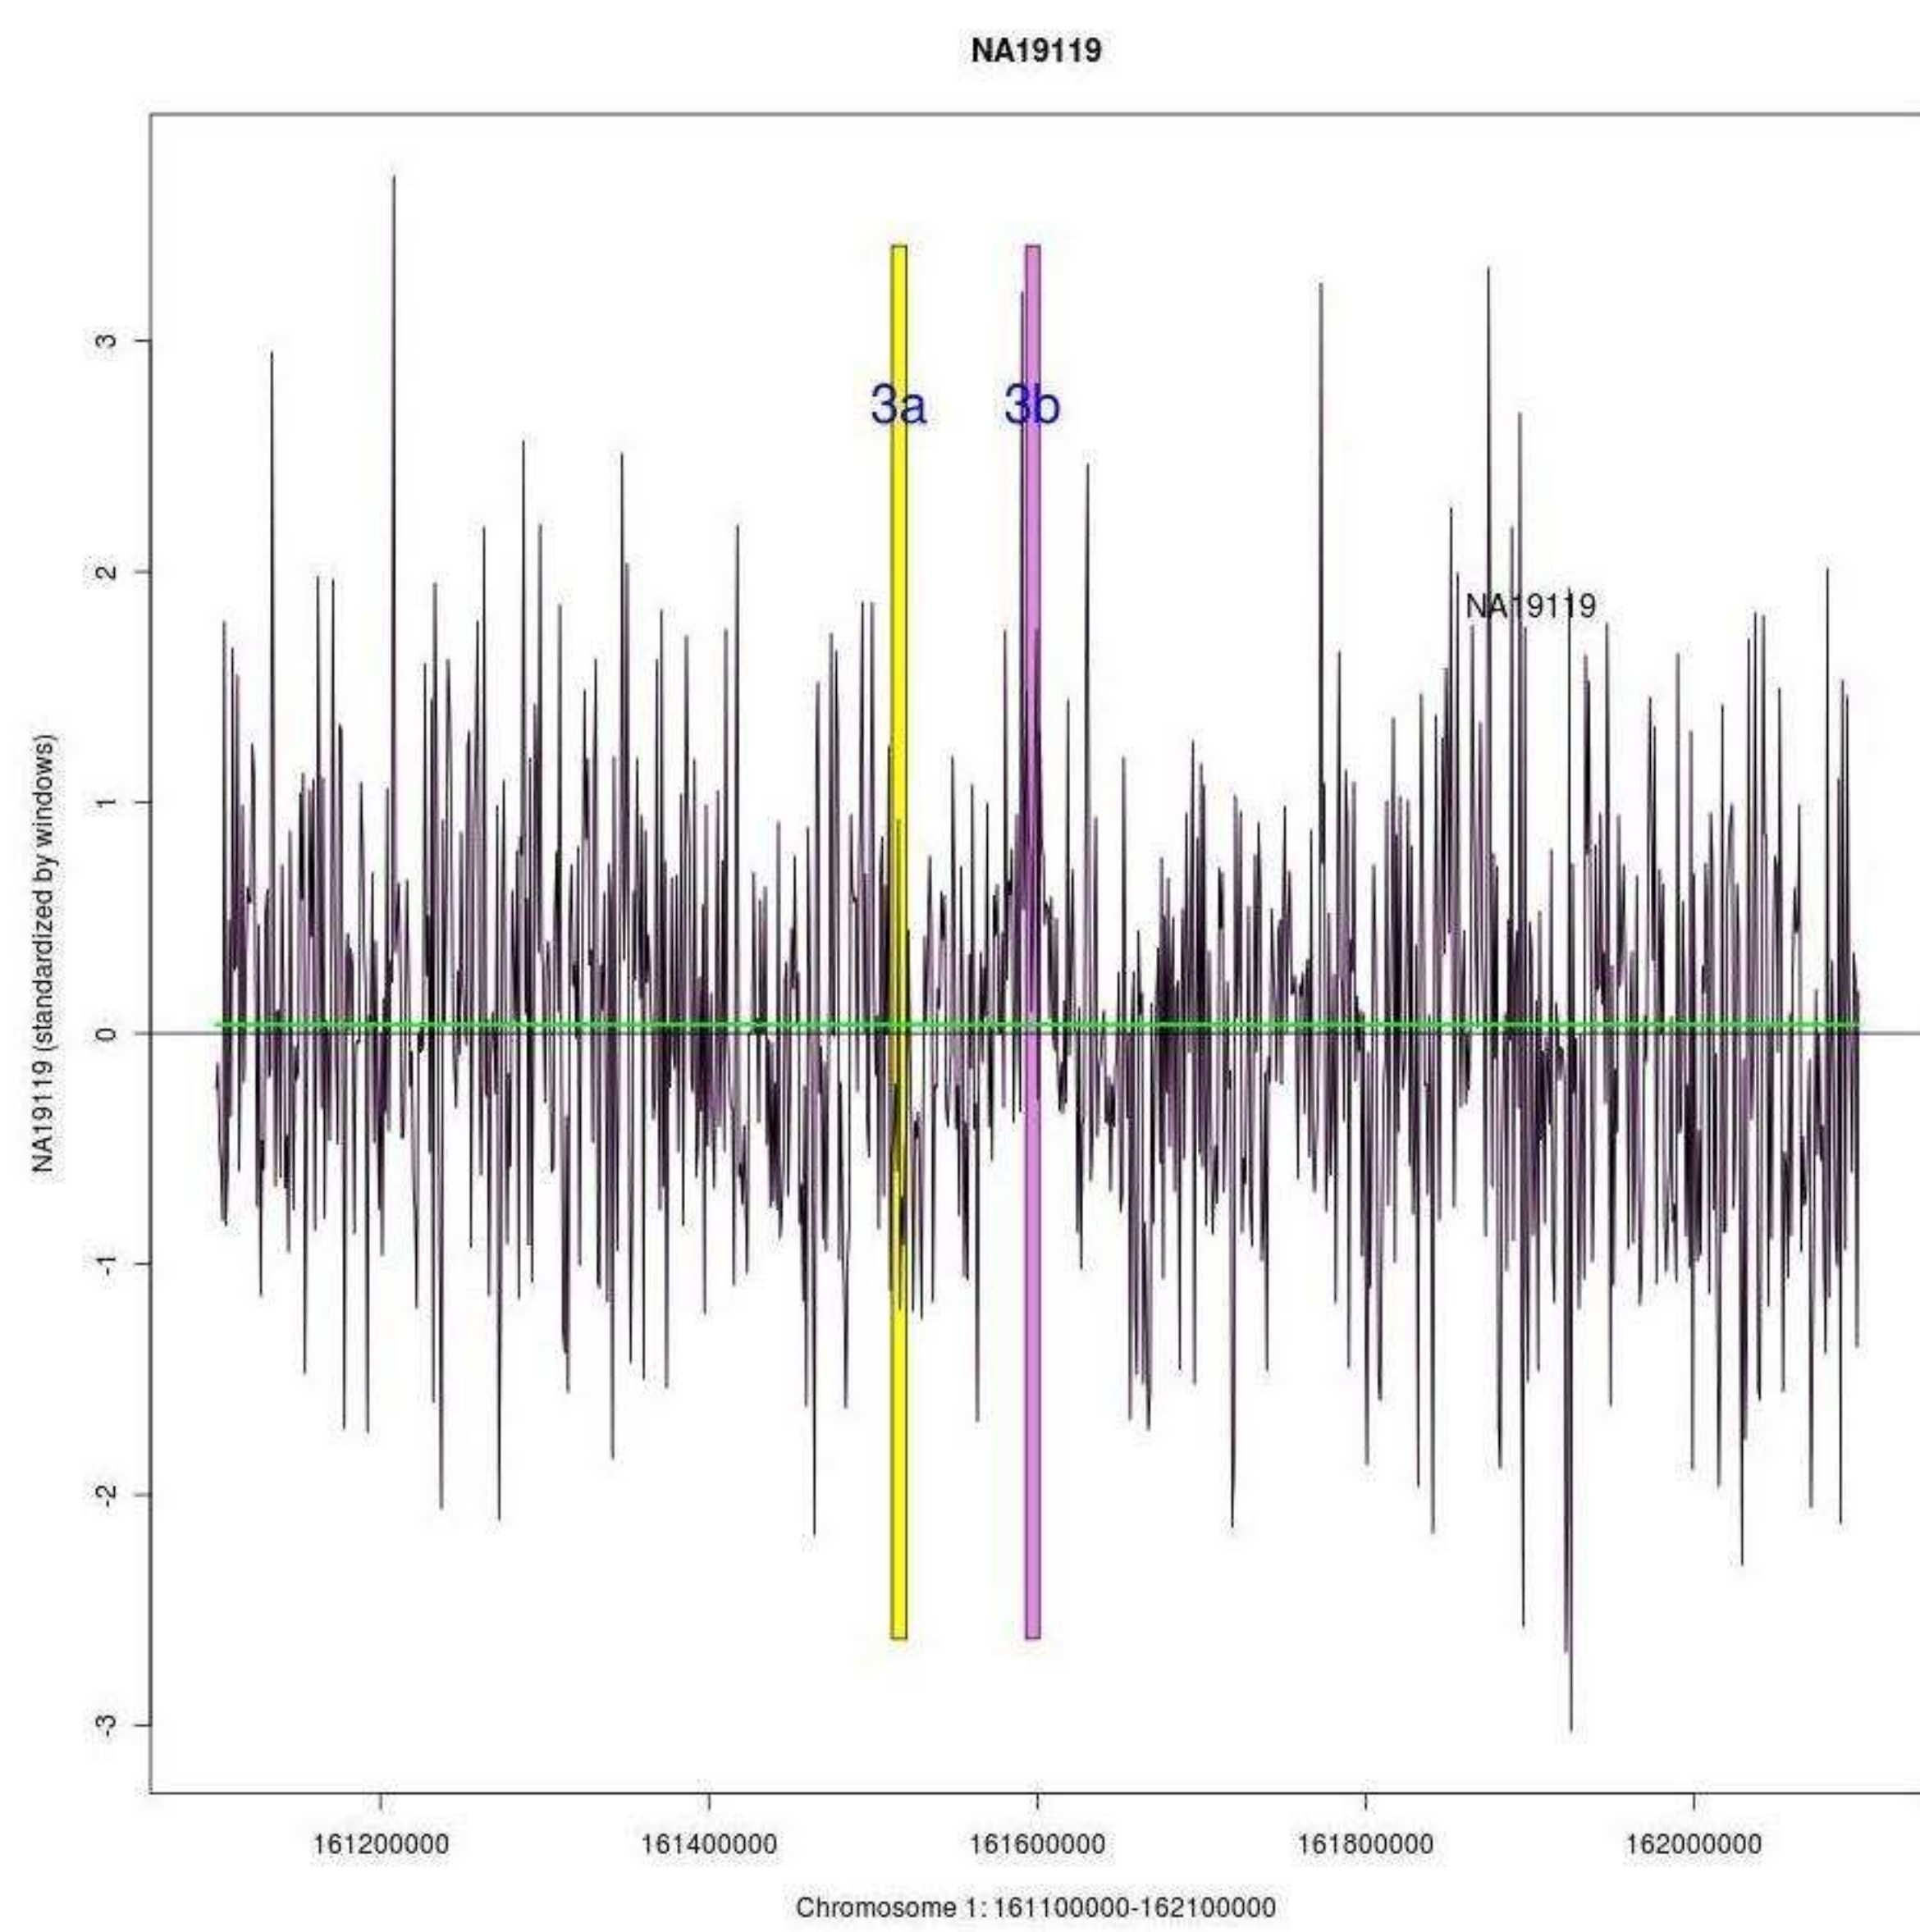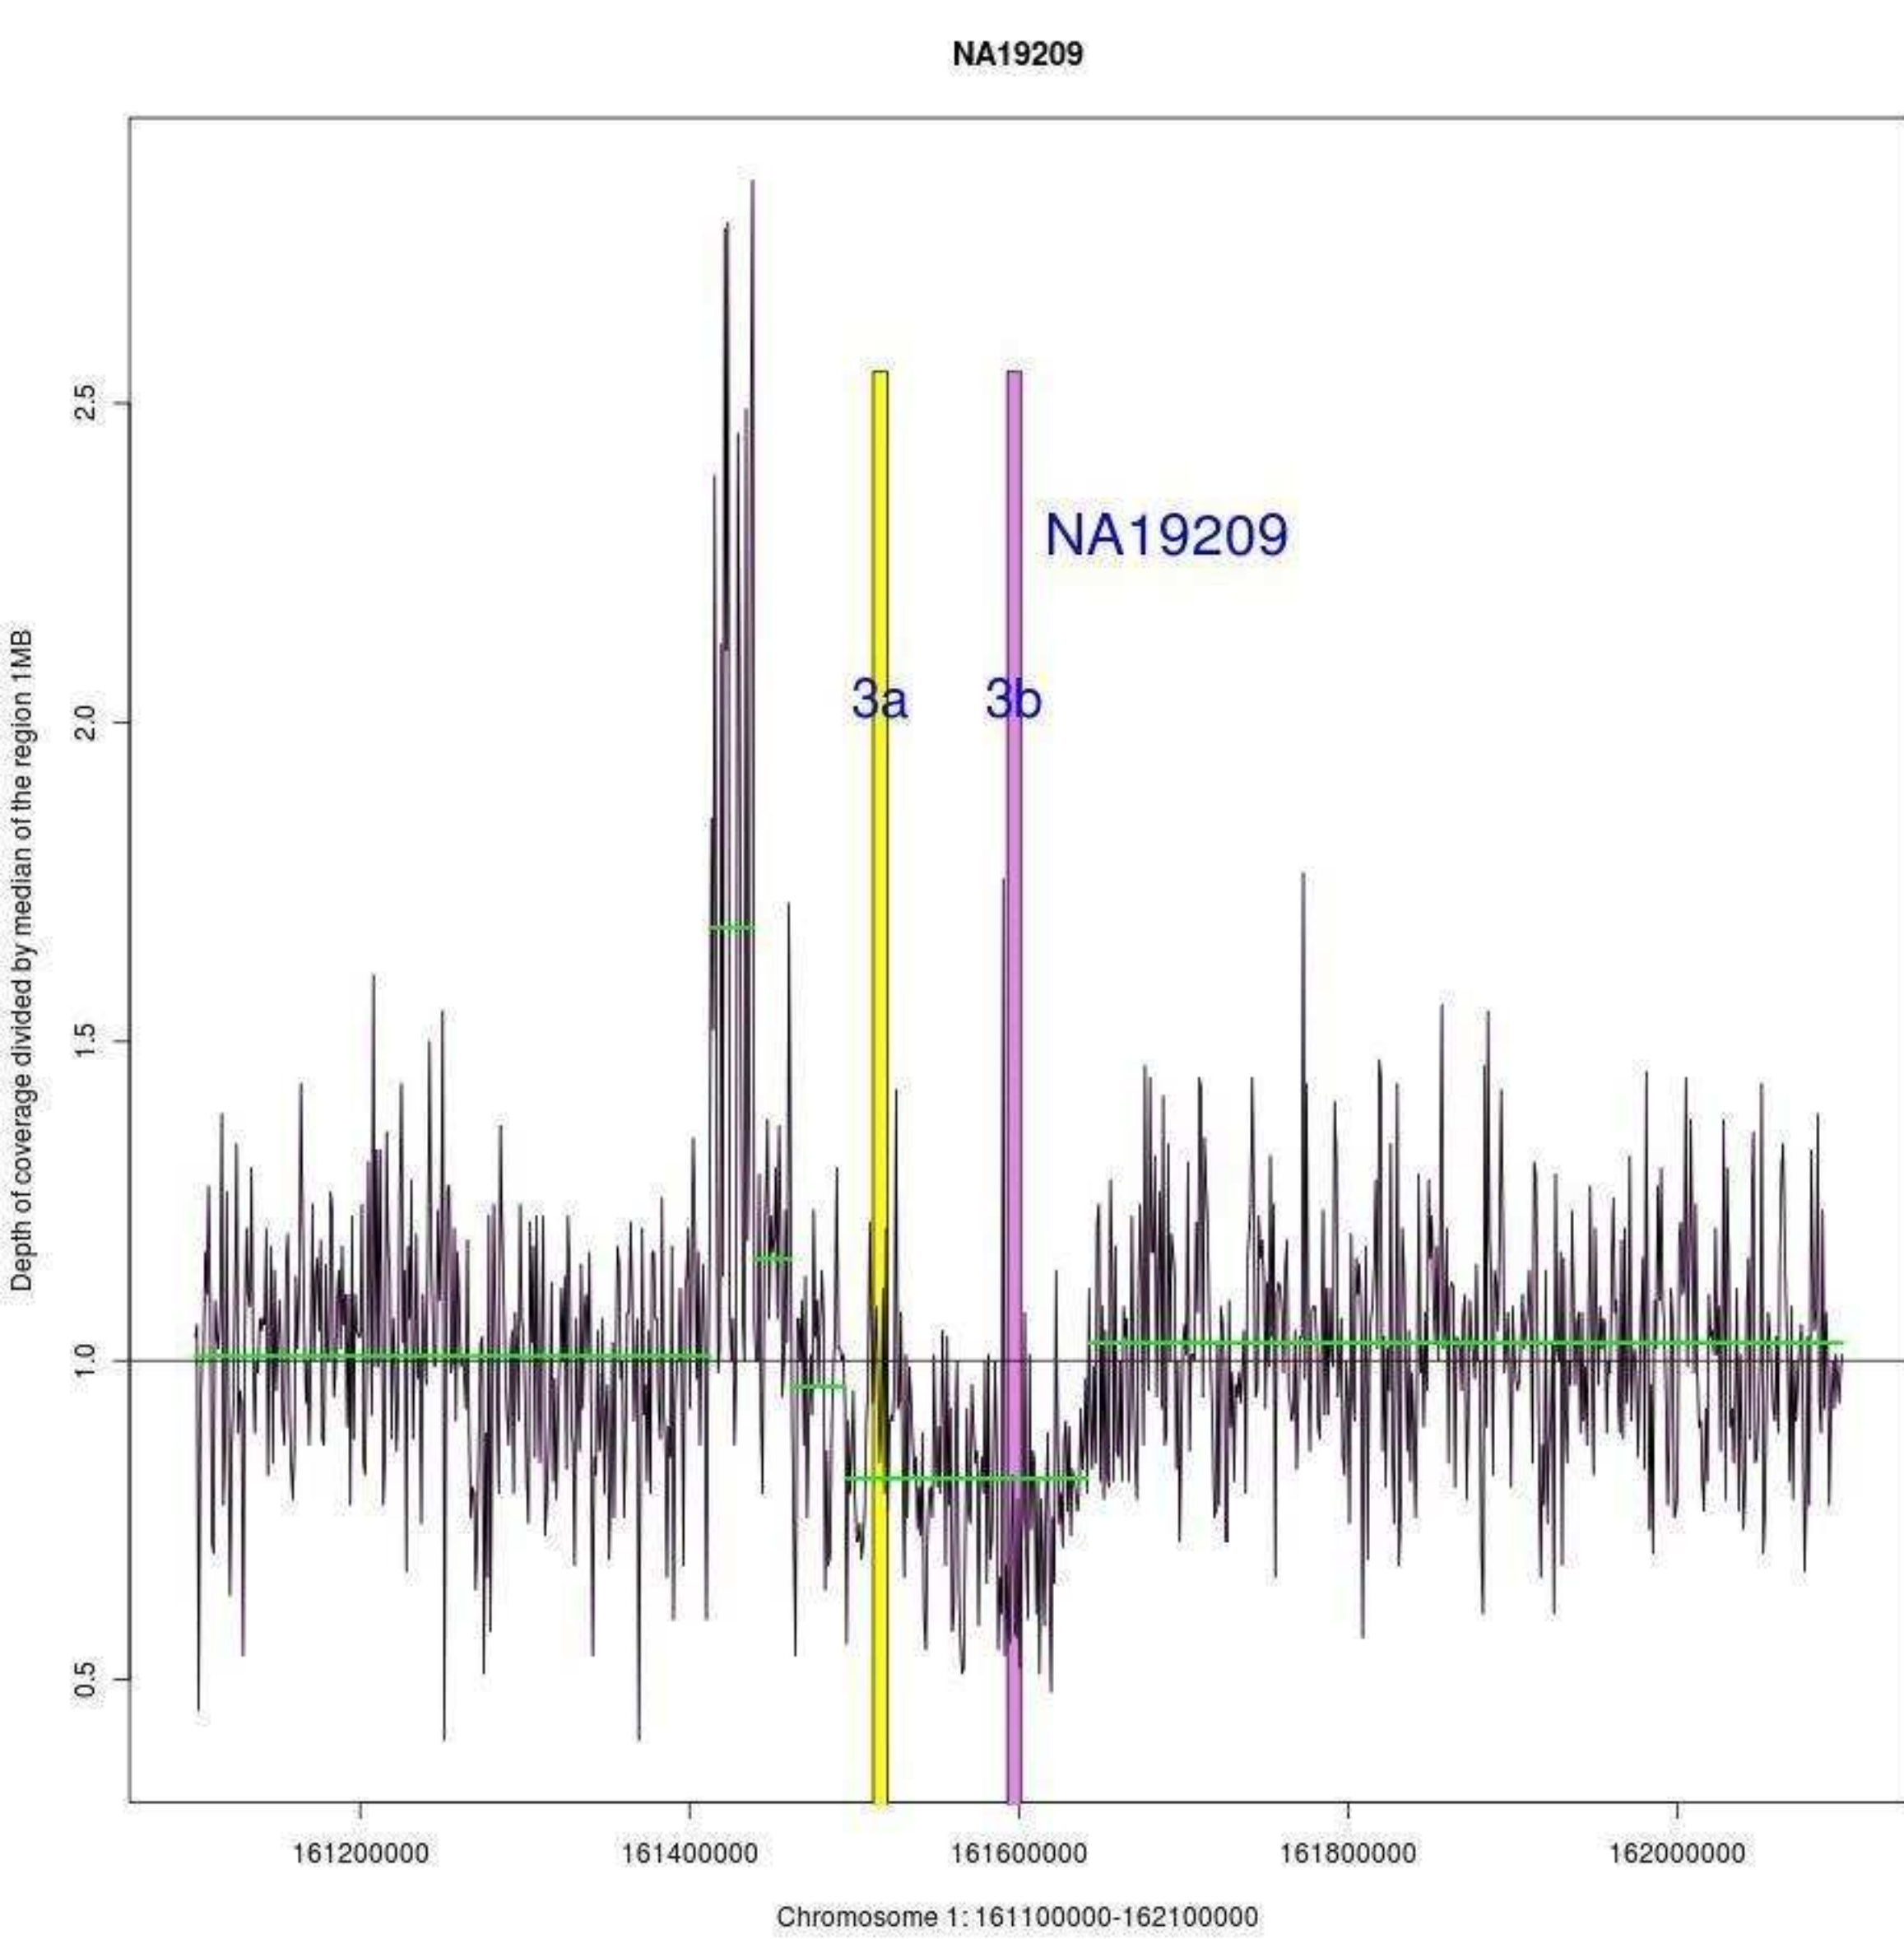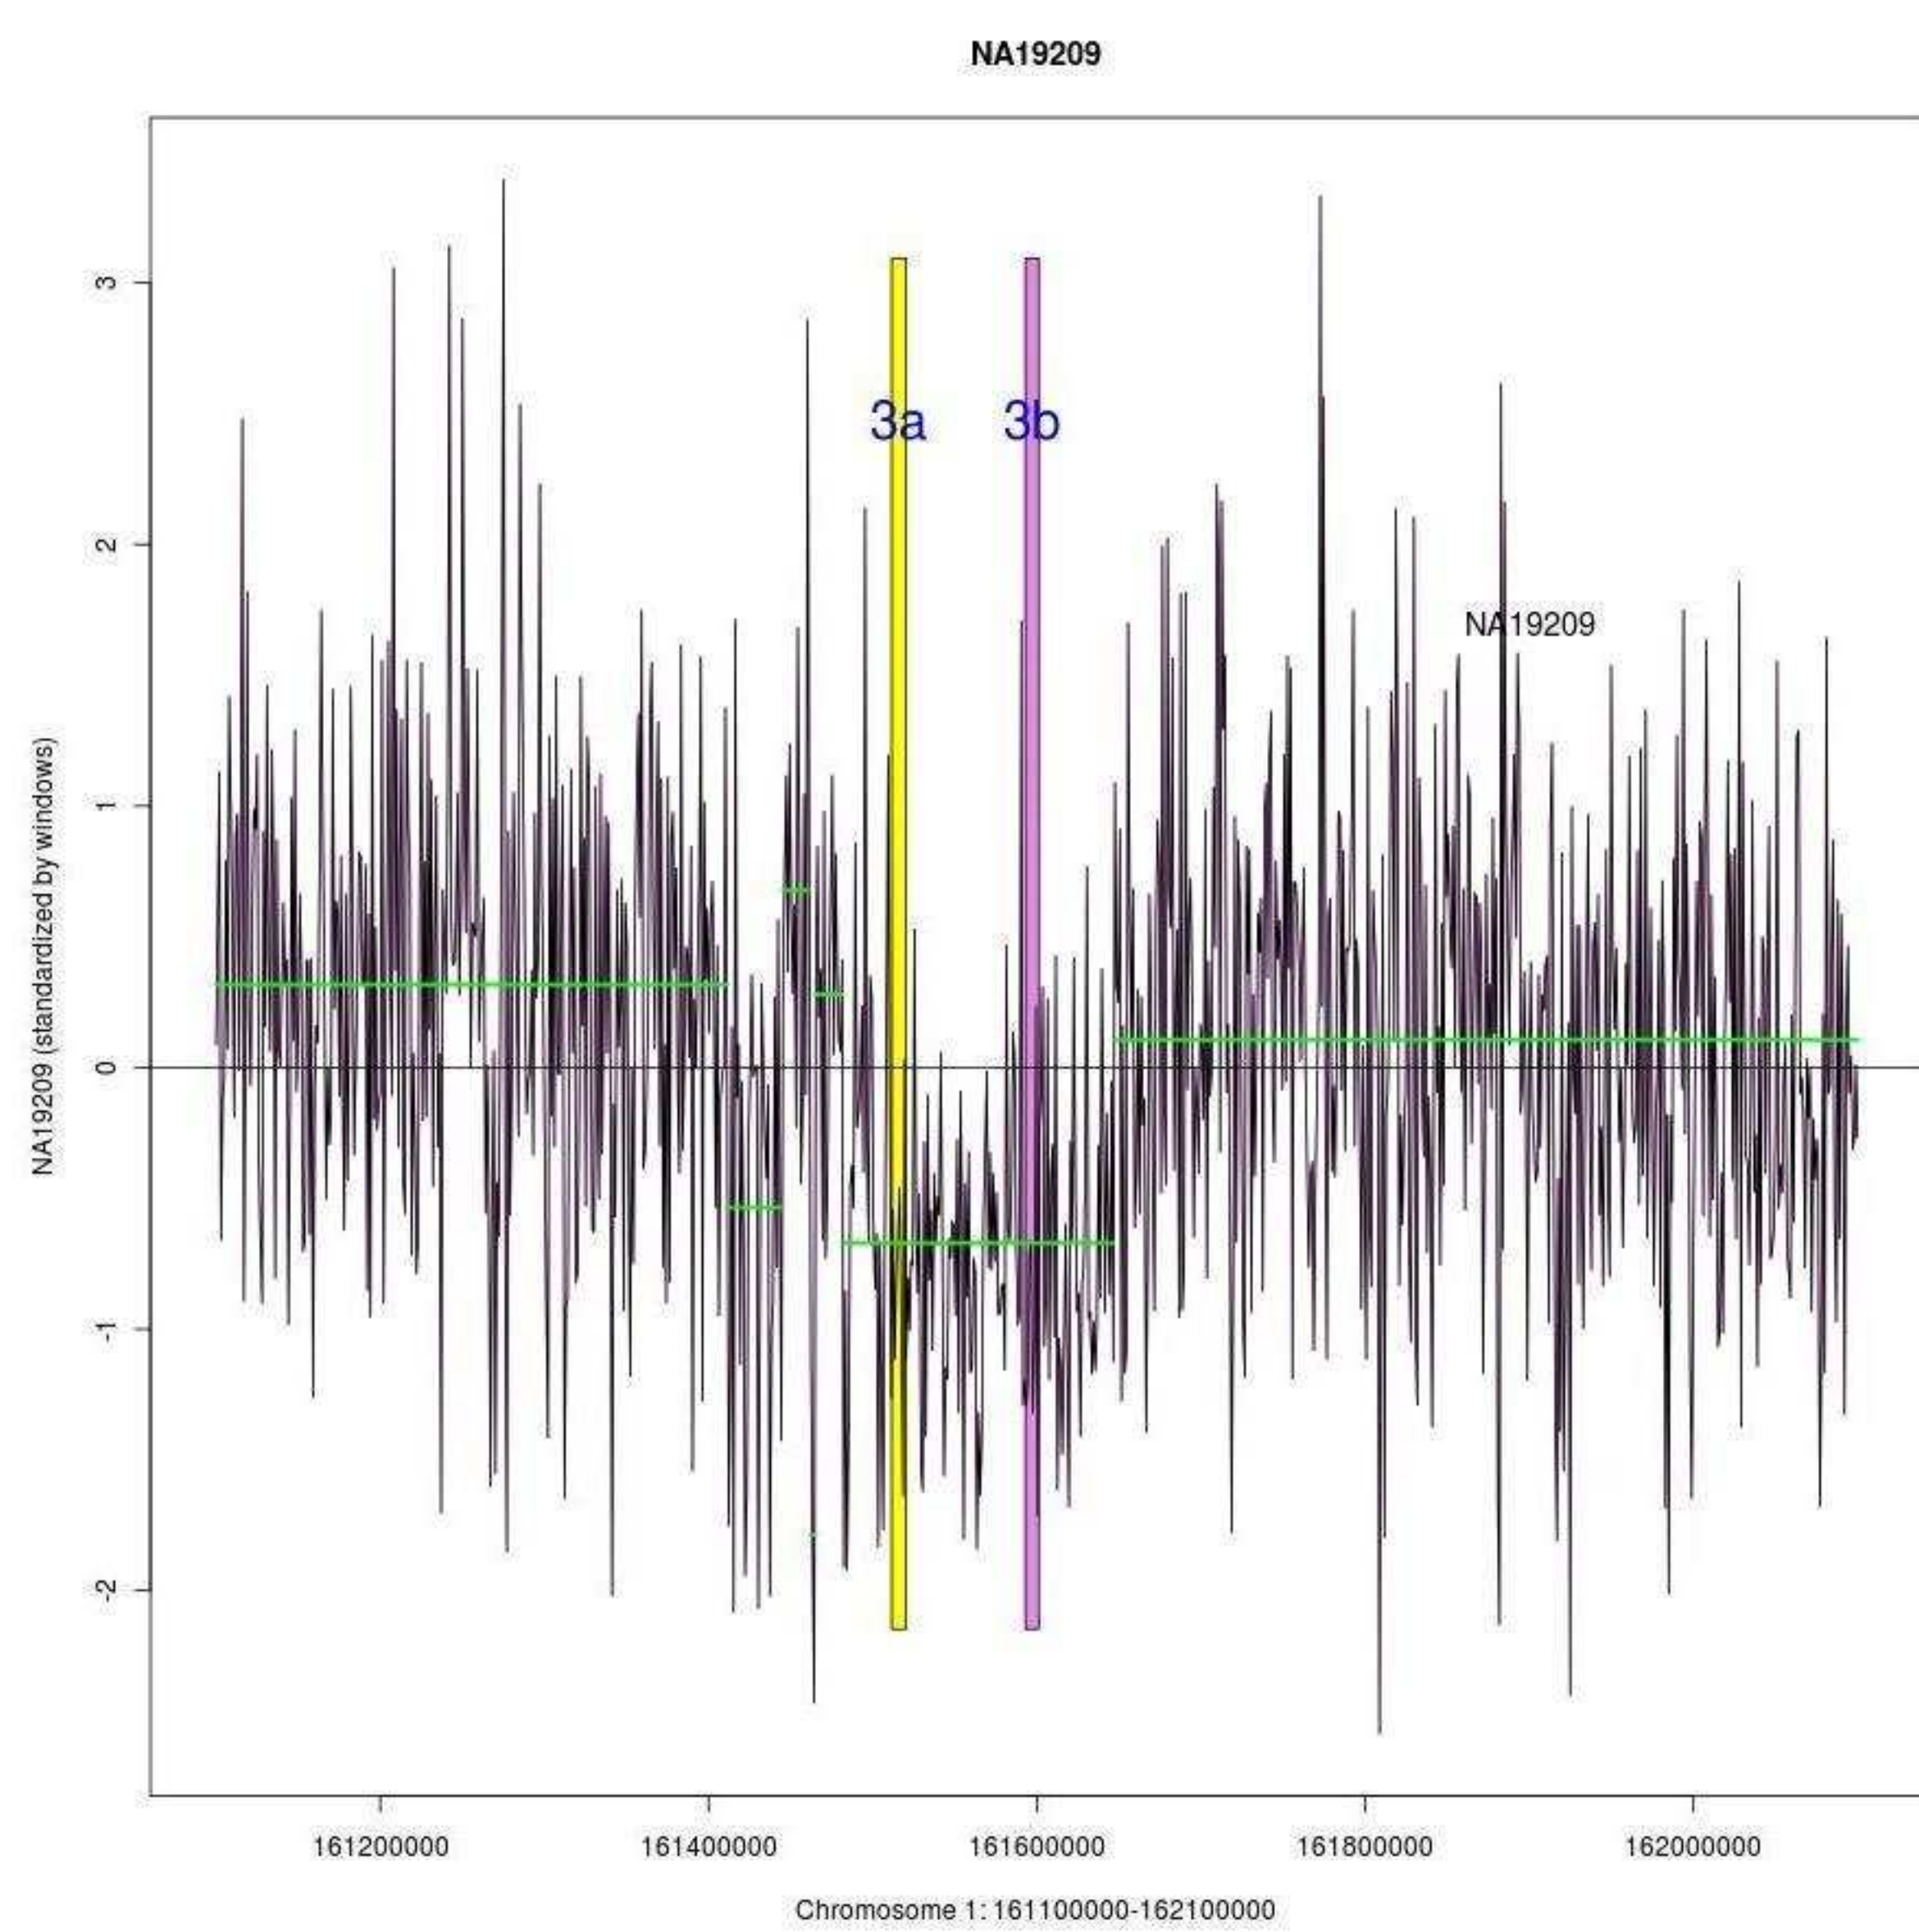

Supplement: pone.0063219.s004.pdf [file pone.0063219.s004.pdf]
