# Supplementary material for: CNVrd, a Read-Depth Algorithm for Assigning Copy-Number at the FCGR Locus: Population-Specific Tagging of Copy Number Variation at FCGR3B
Source: PubMed Central journal article supplement (PMC3640002; doi:10.1371/journal.pone.0063219), 2013-04-30

HG00475

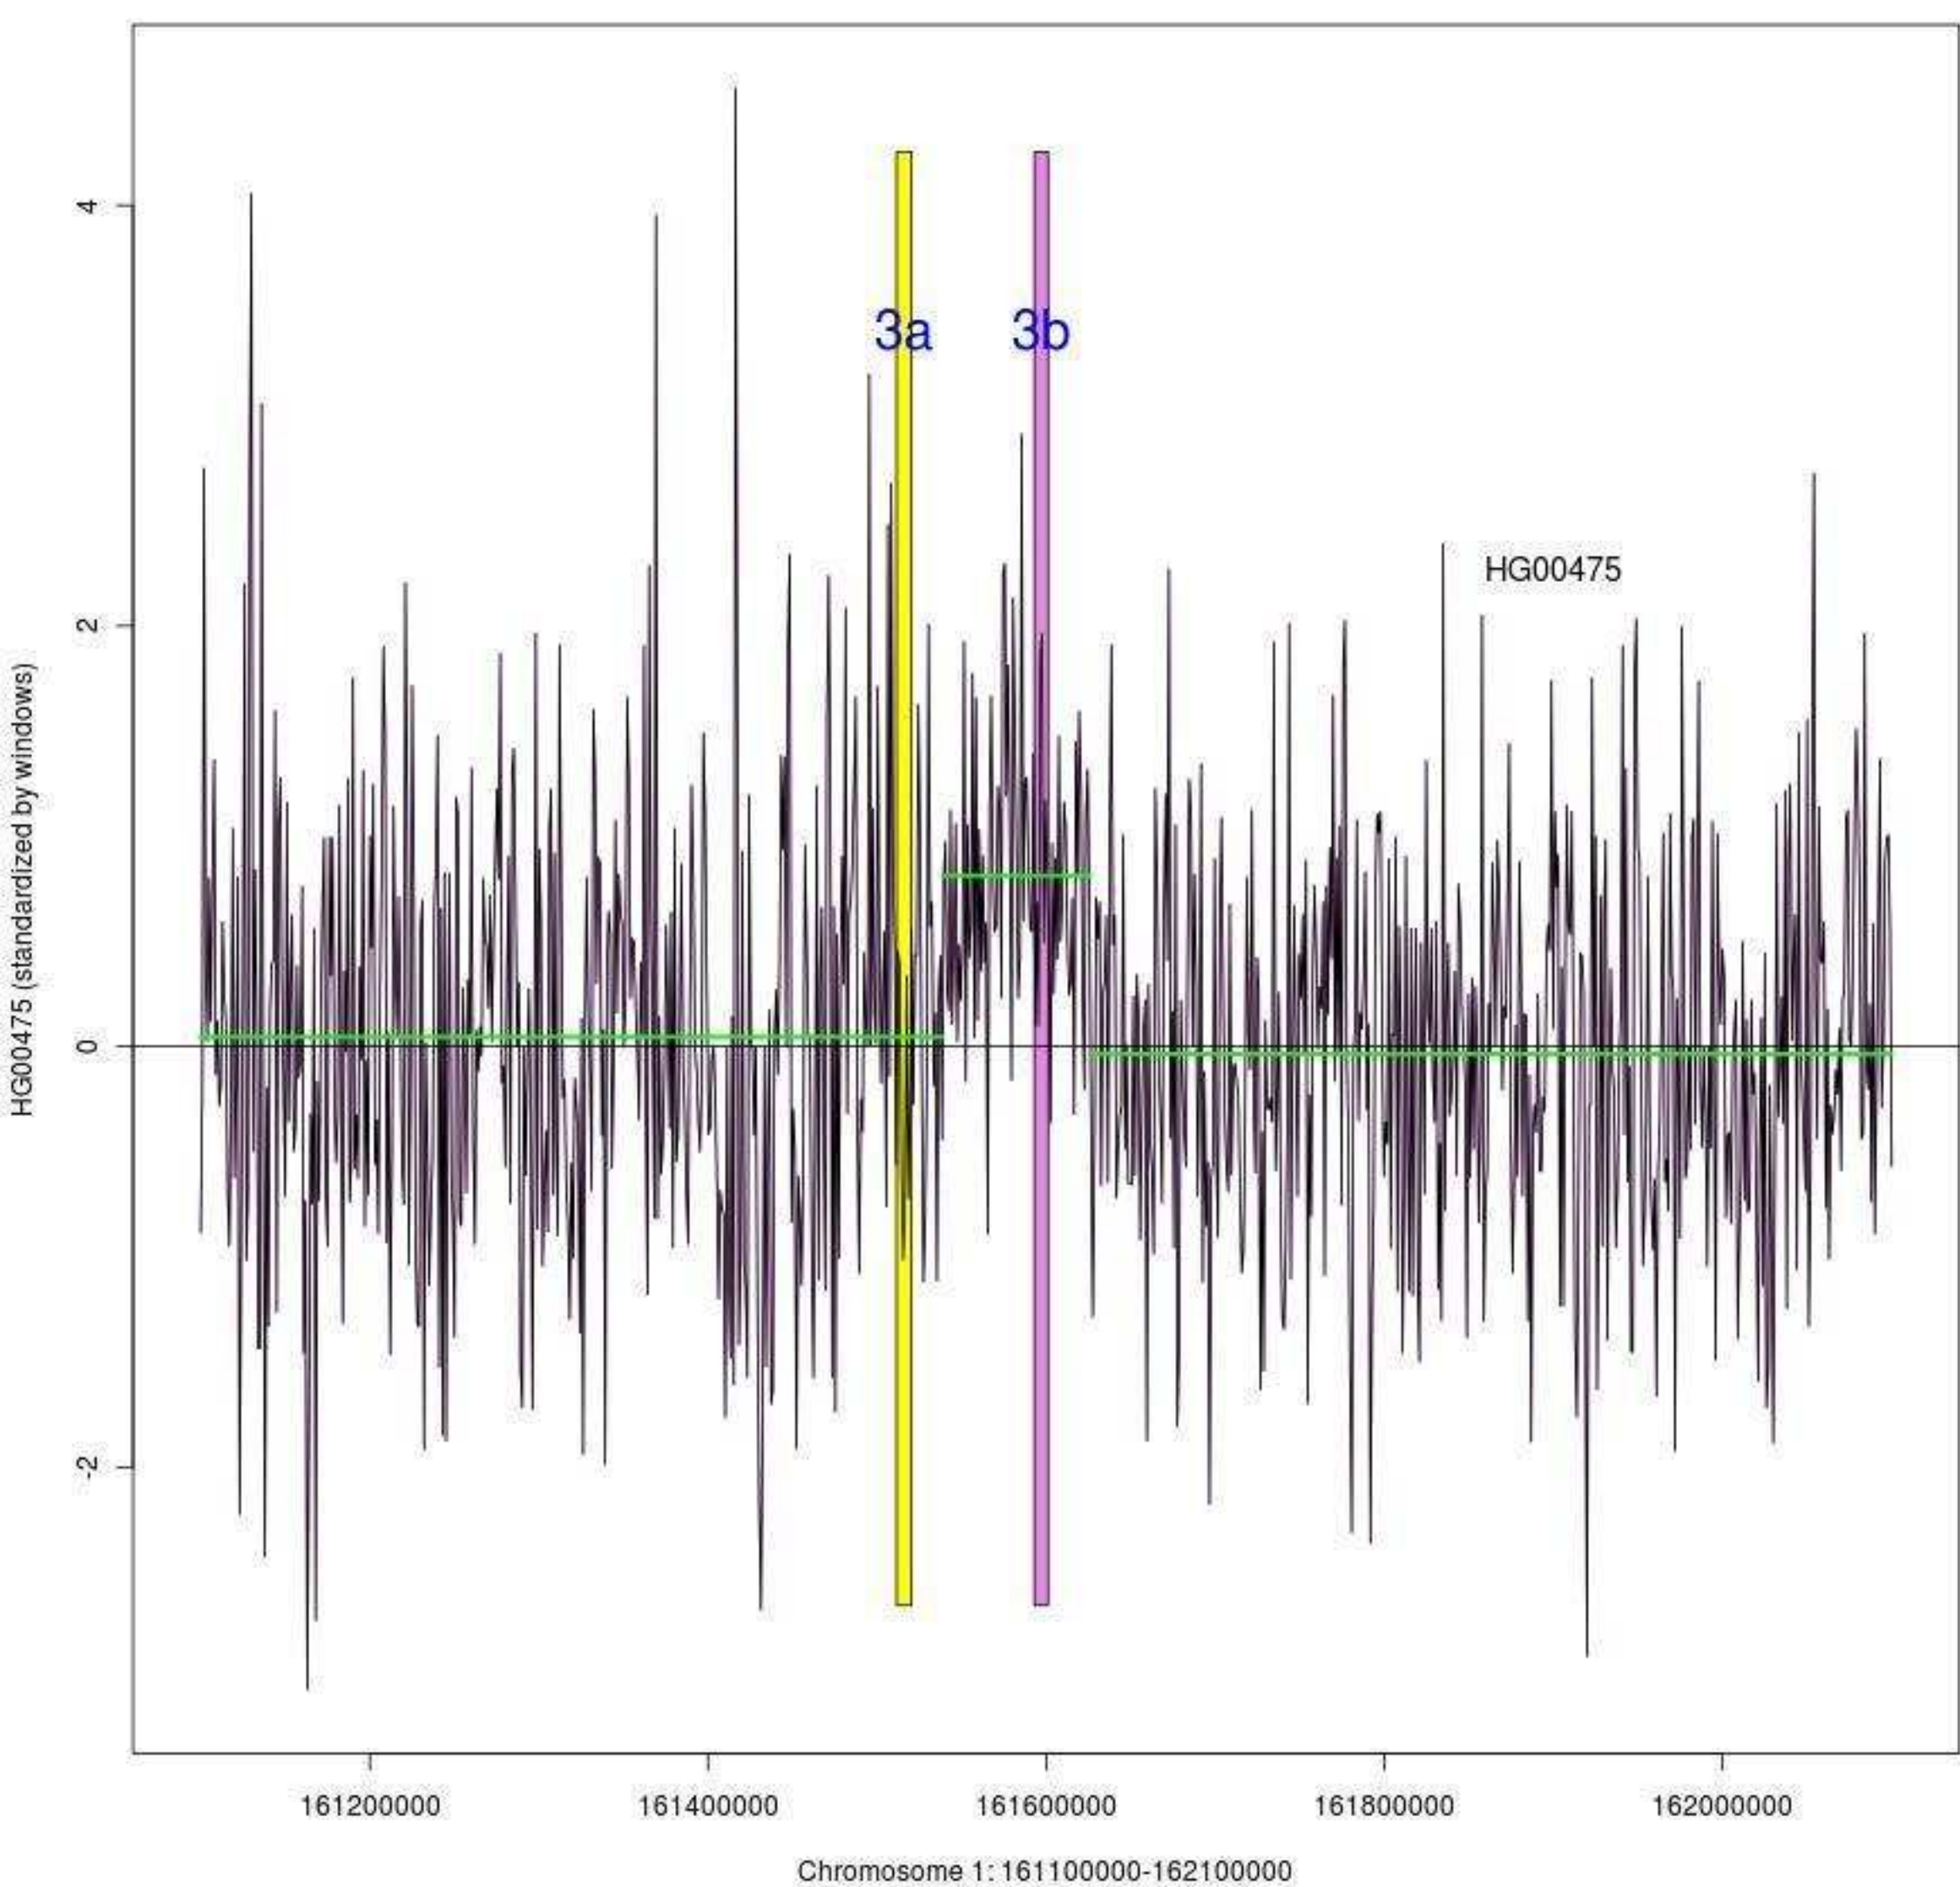

HG00537

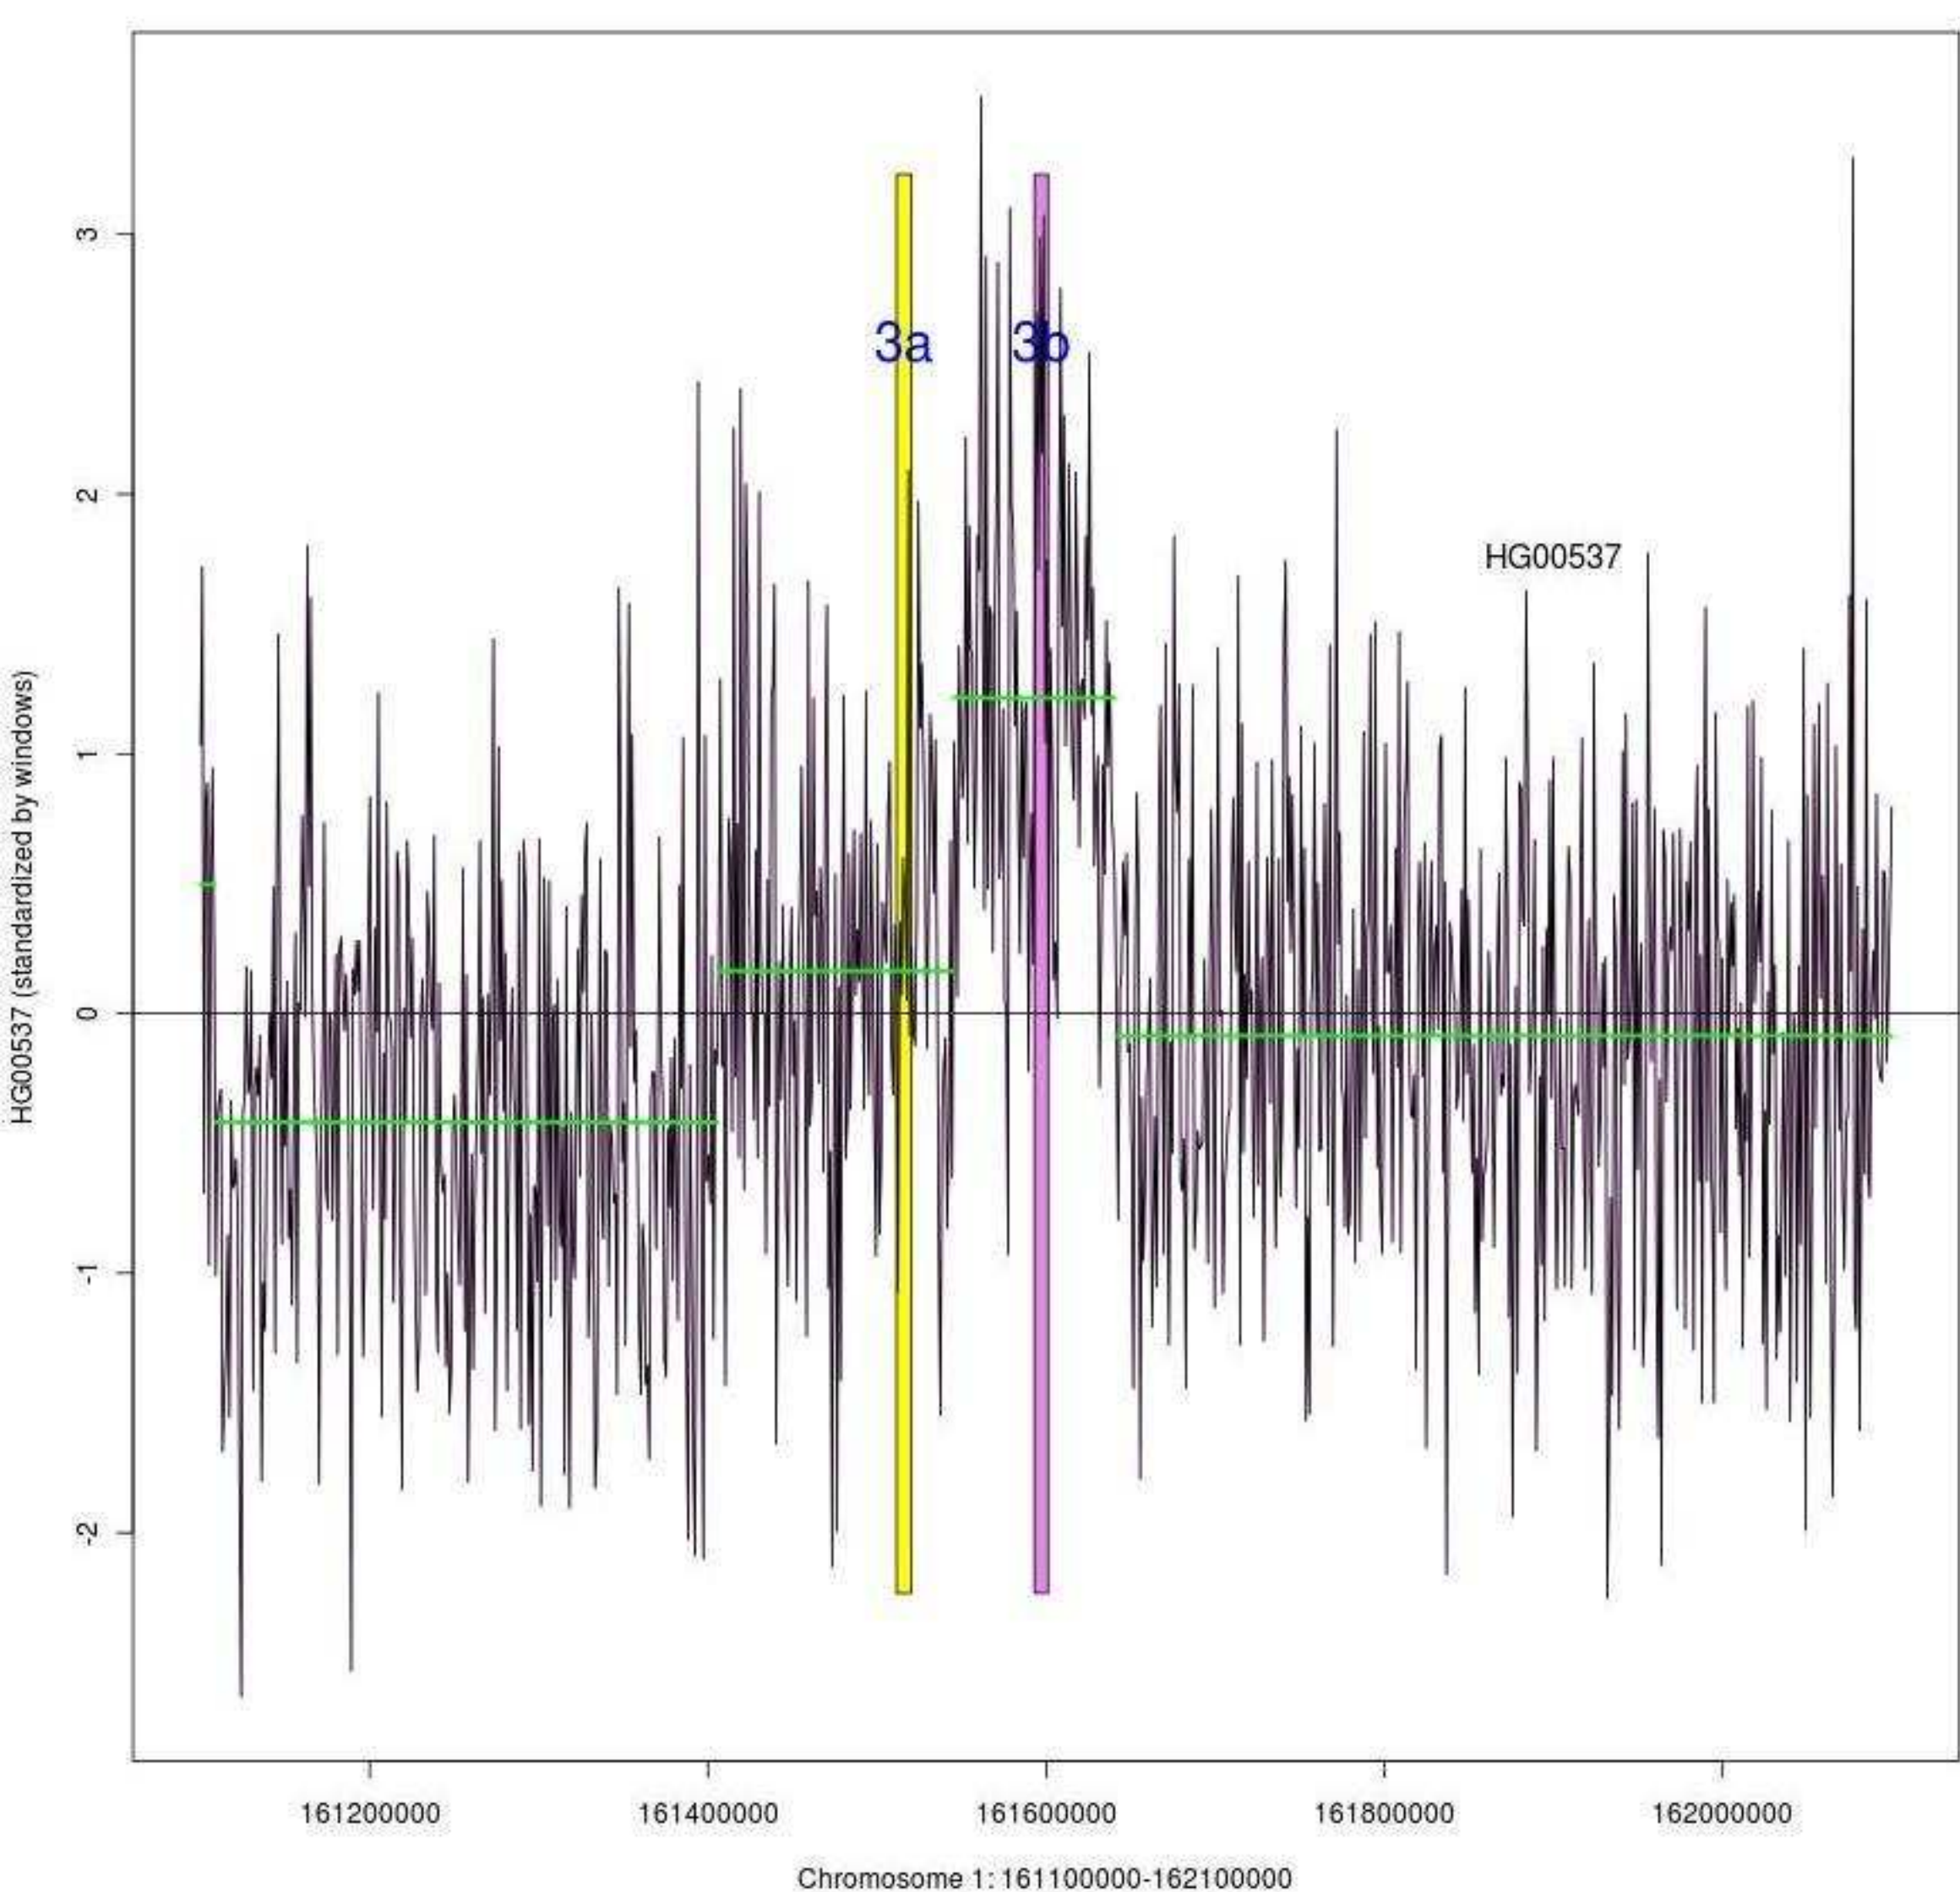

HG00542

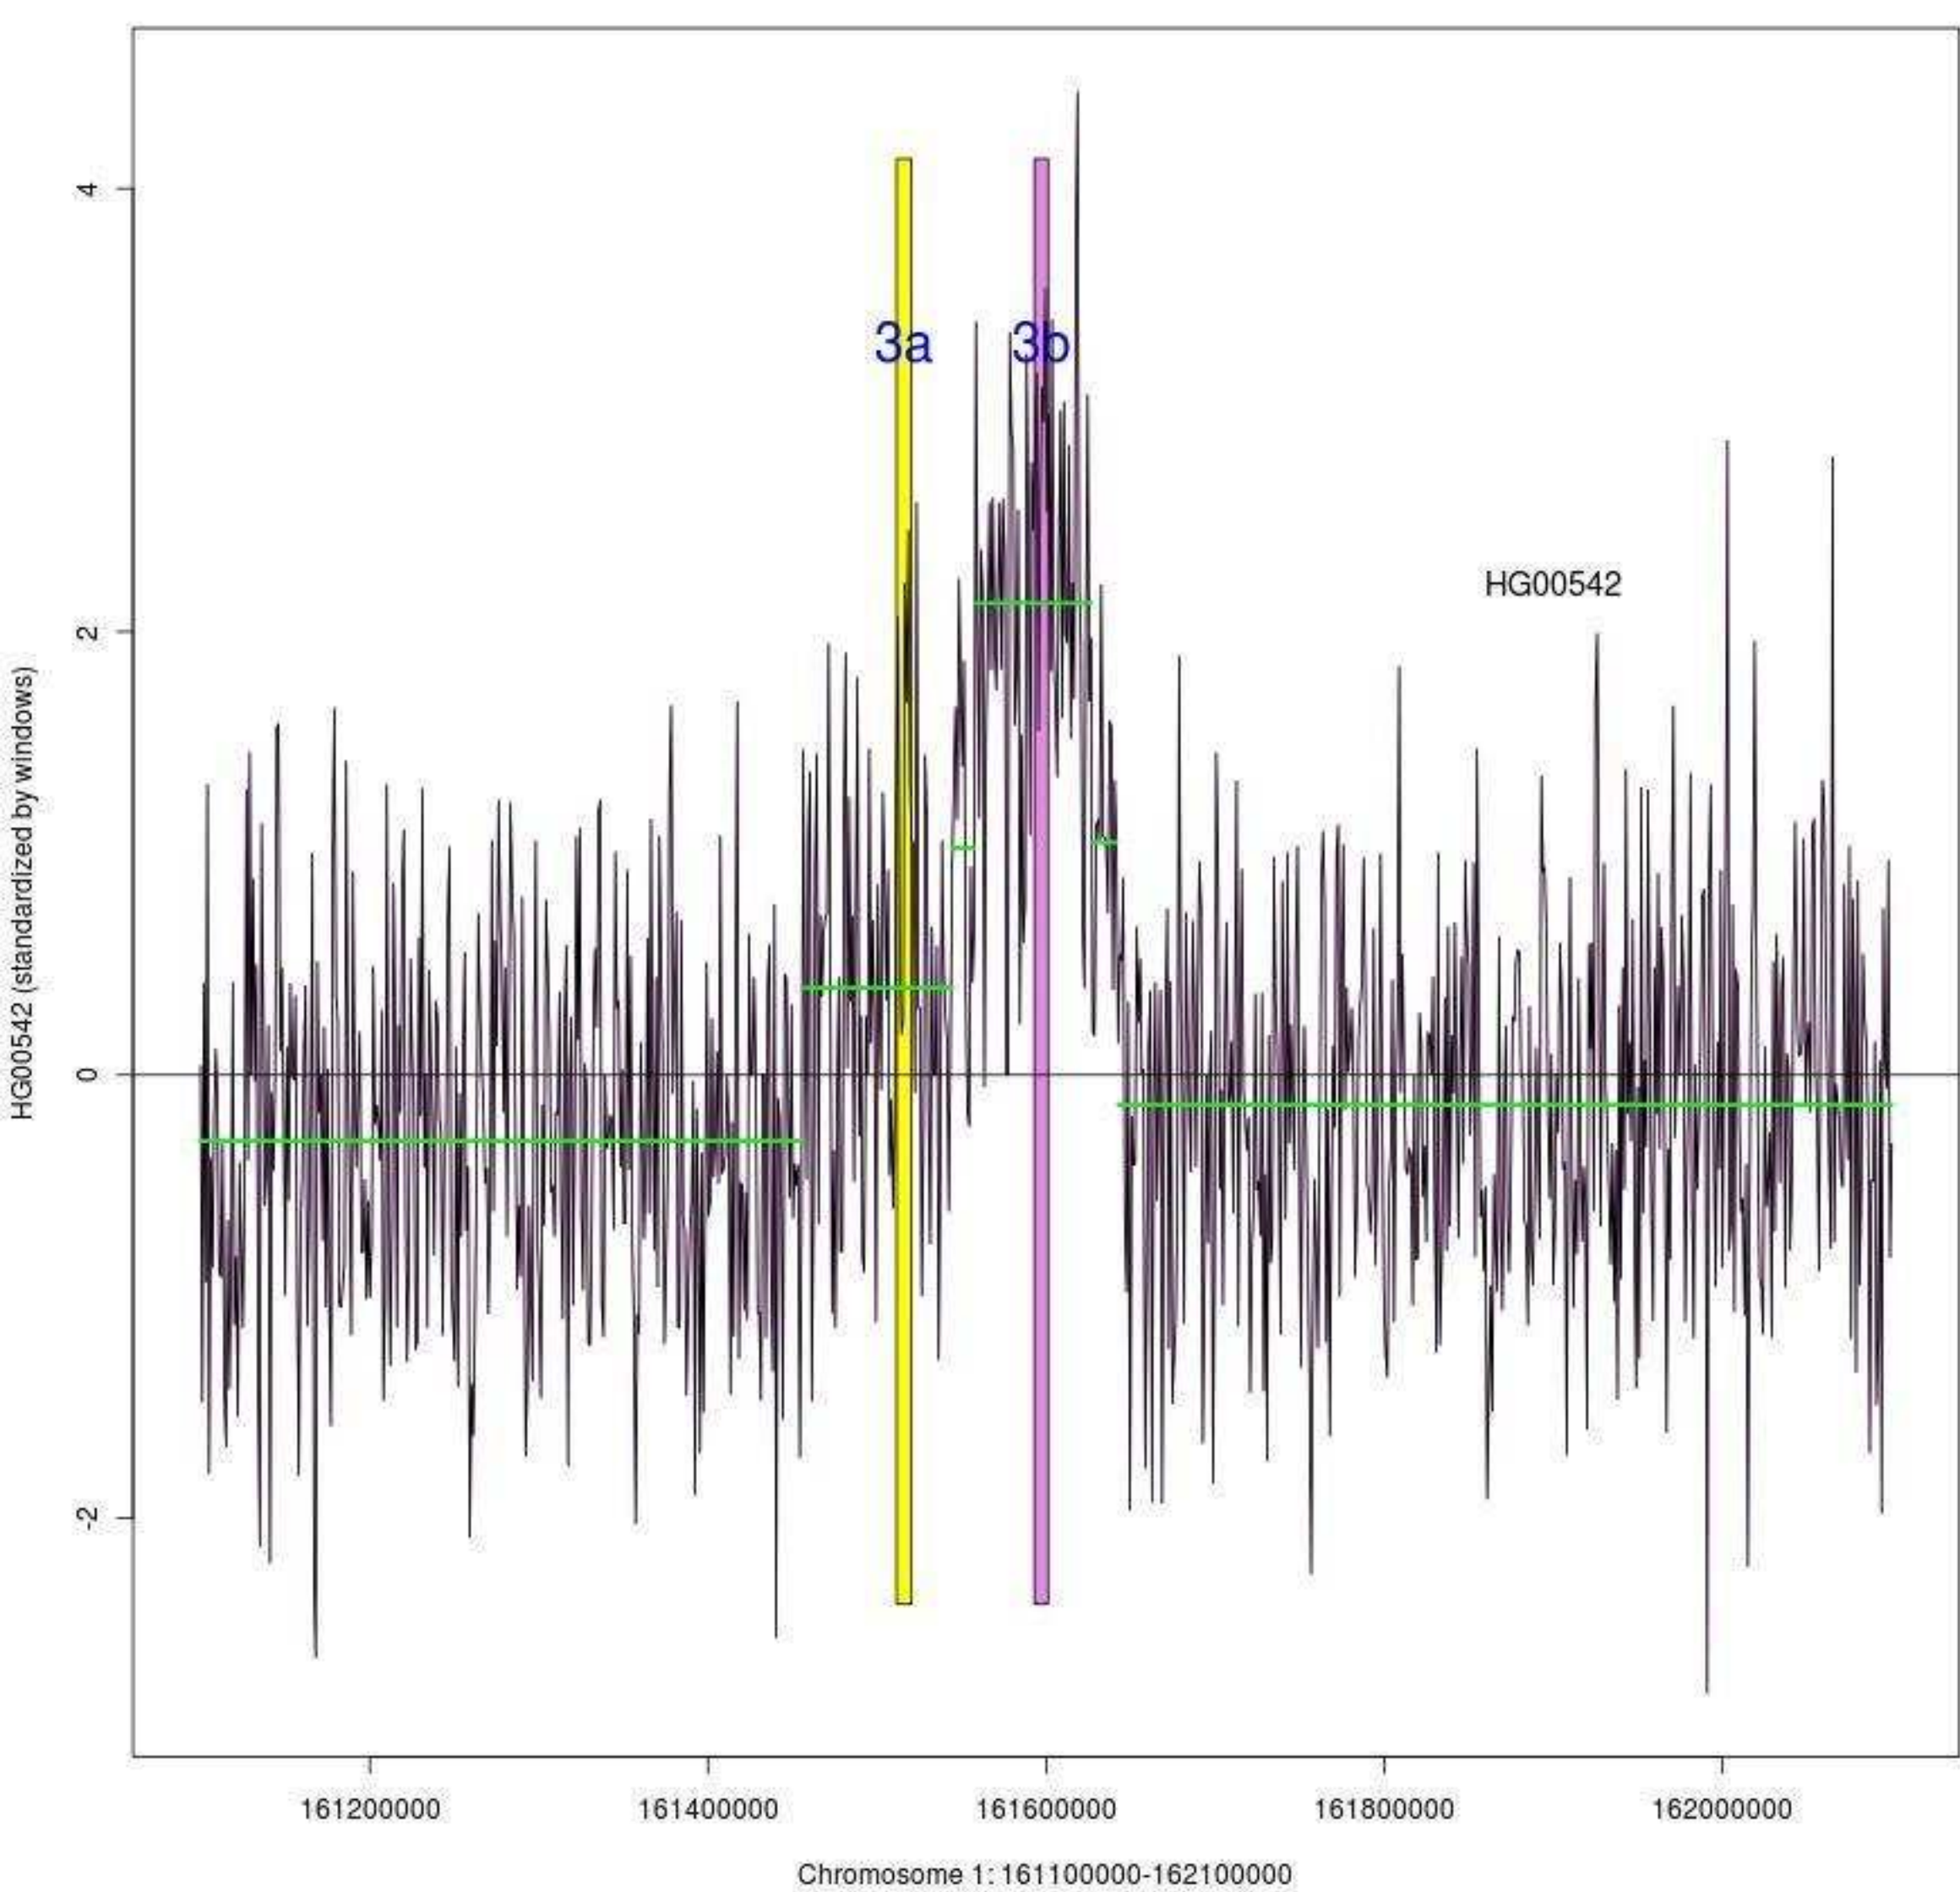



HG00613

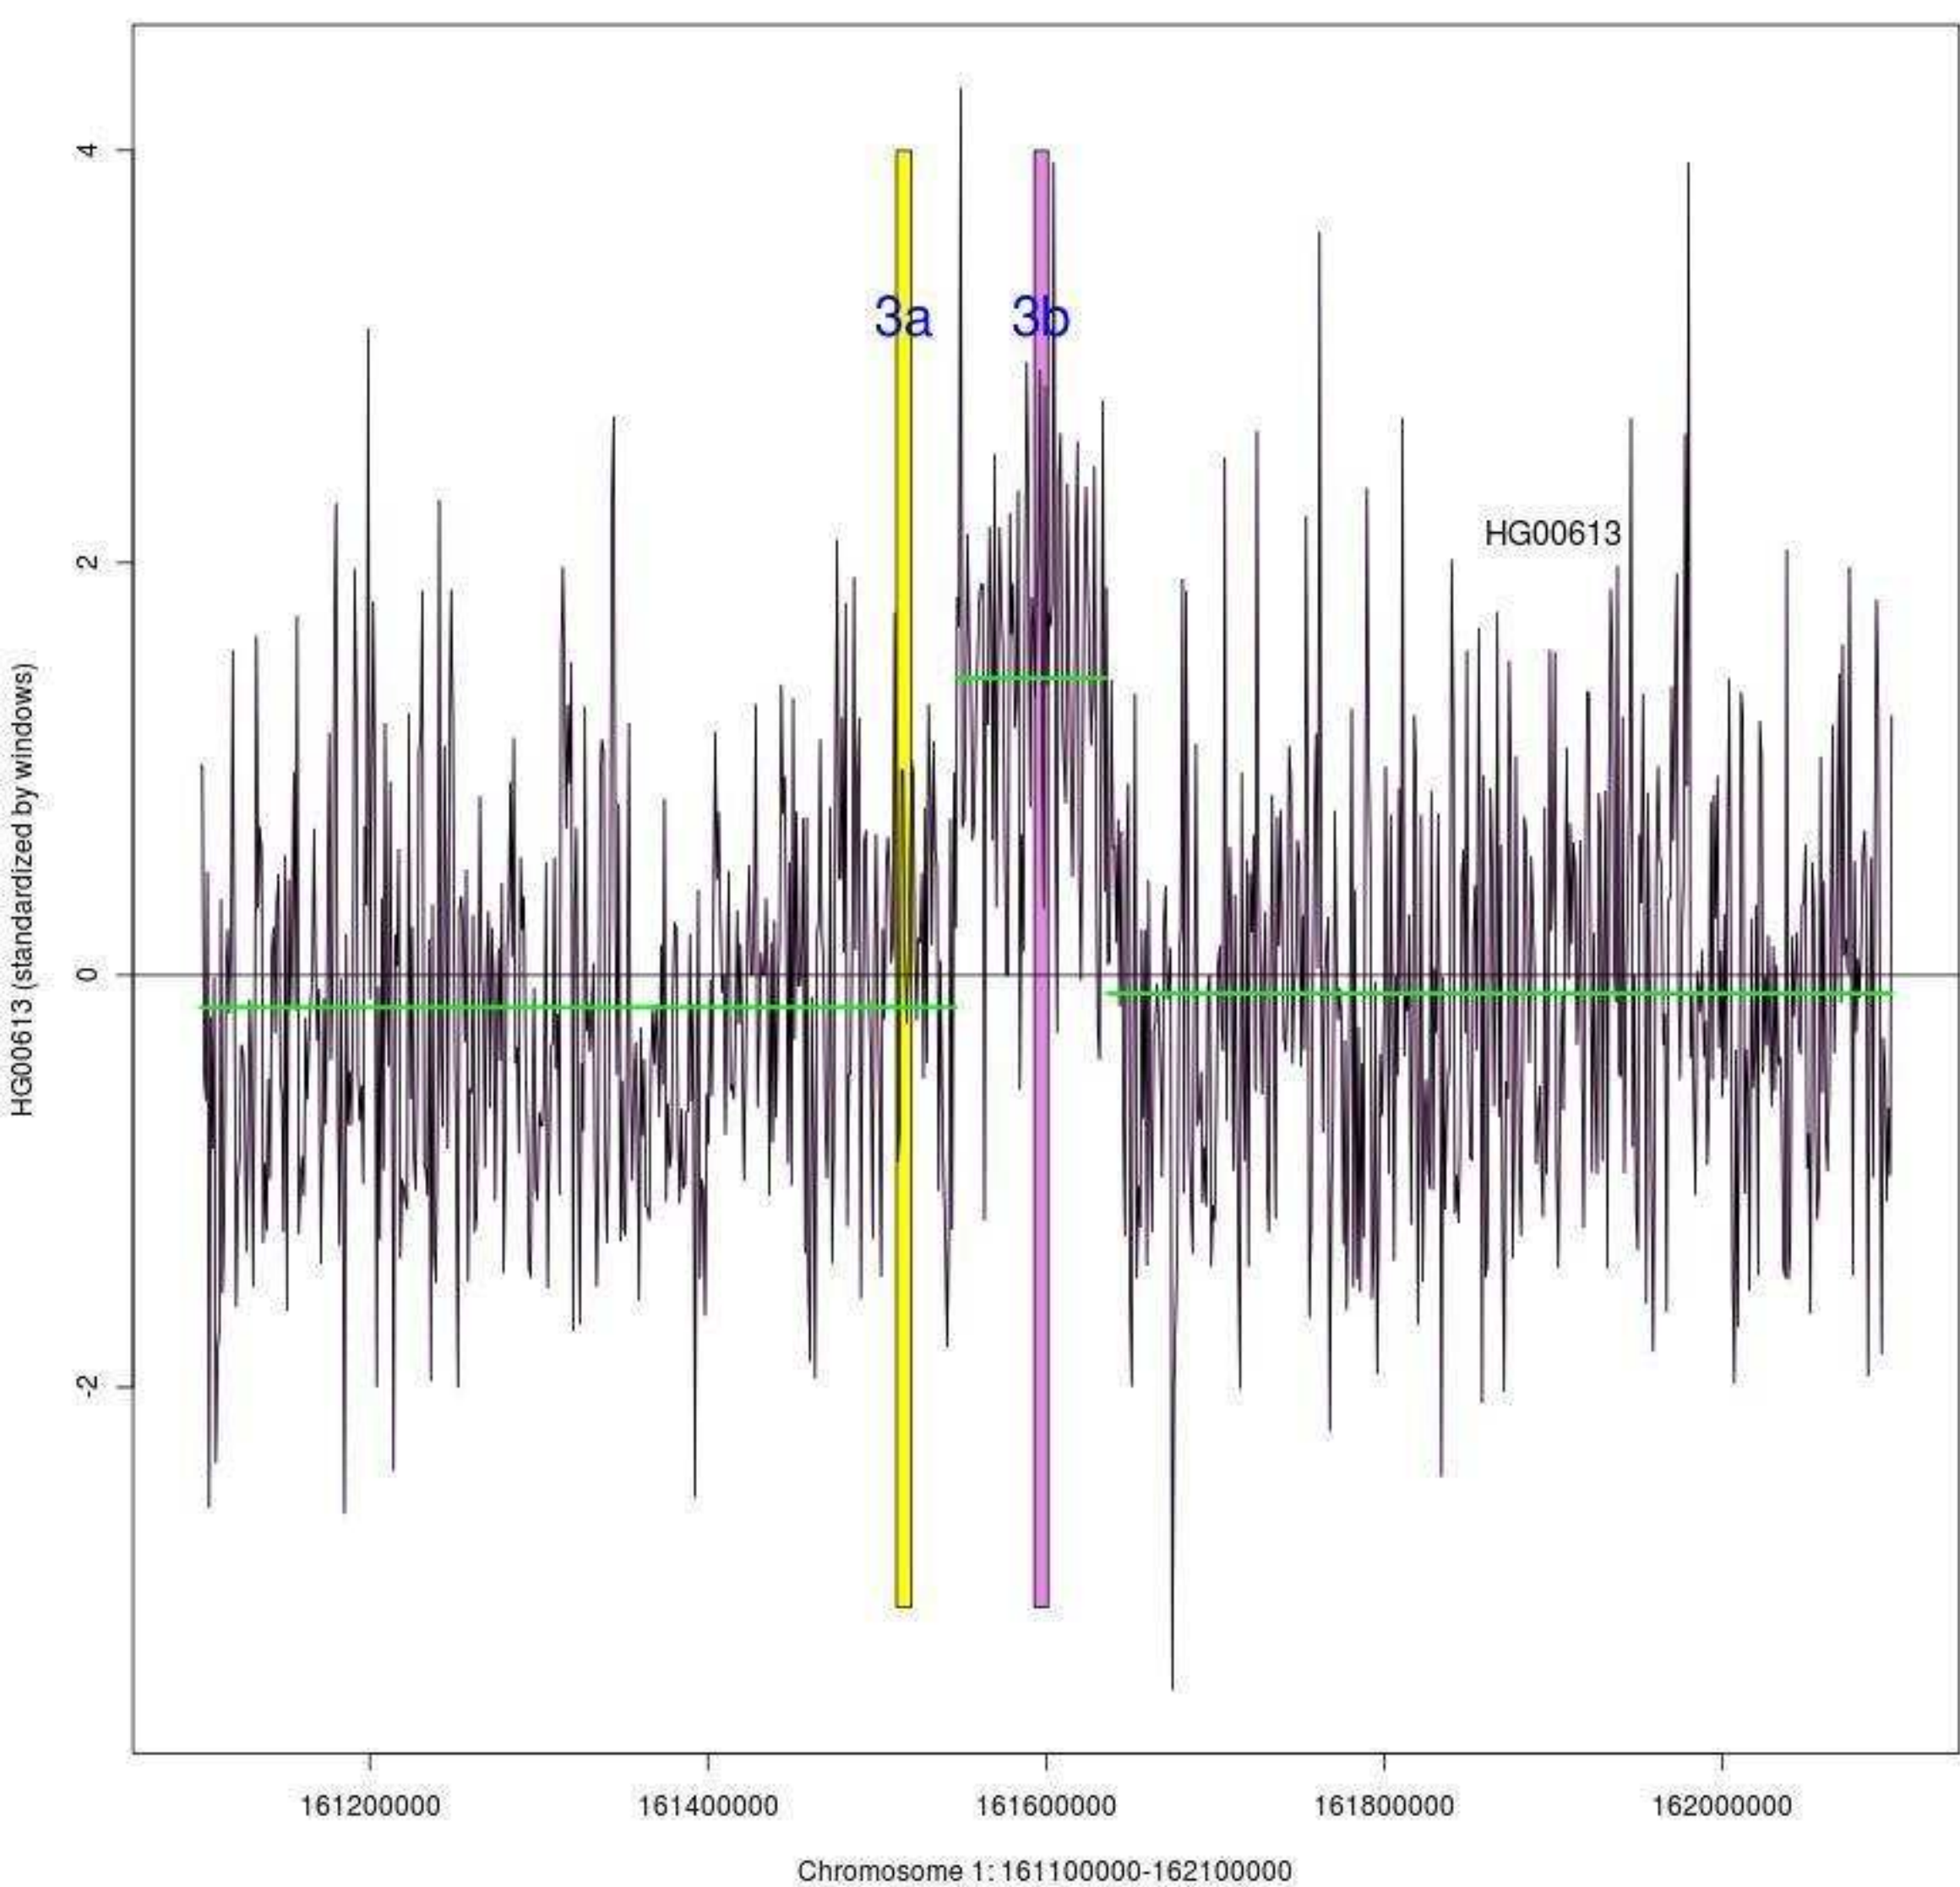

HG00614

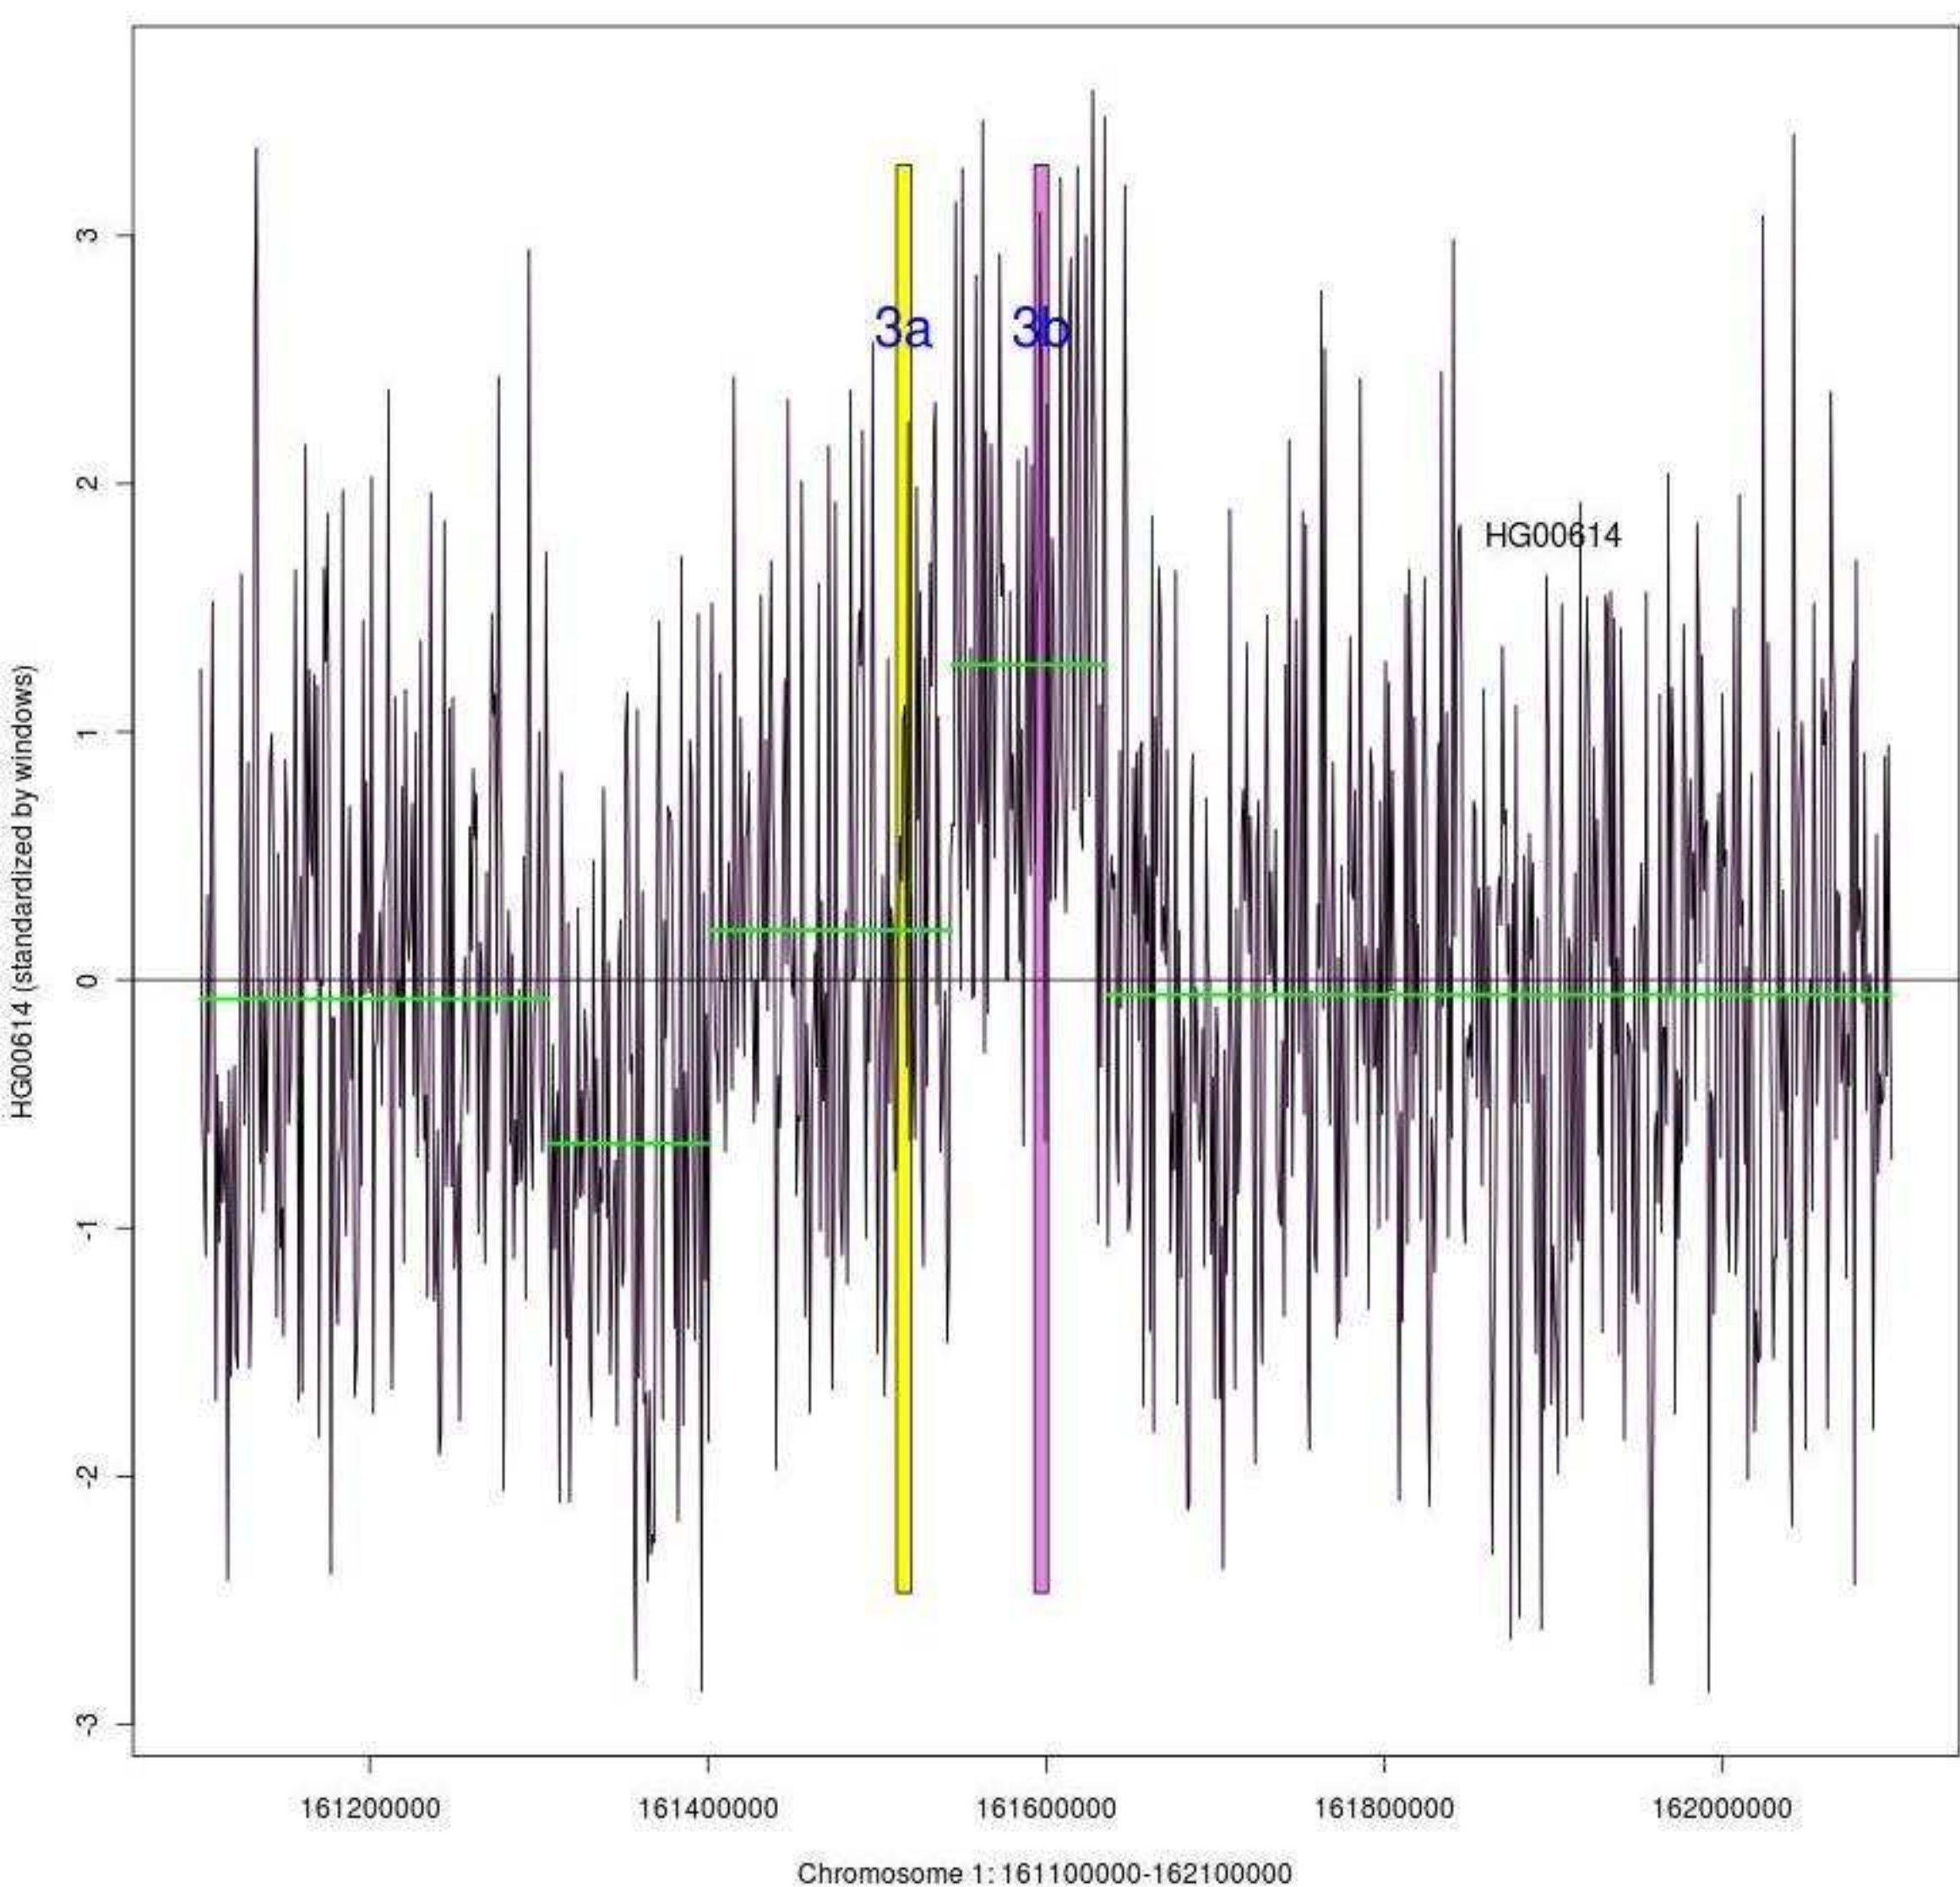

HG00619

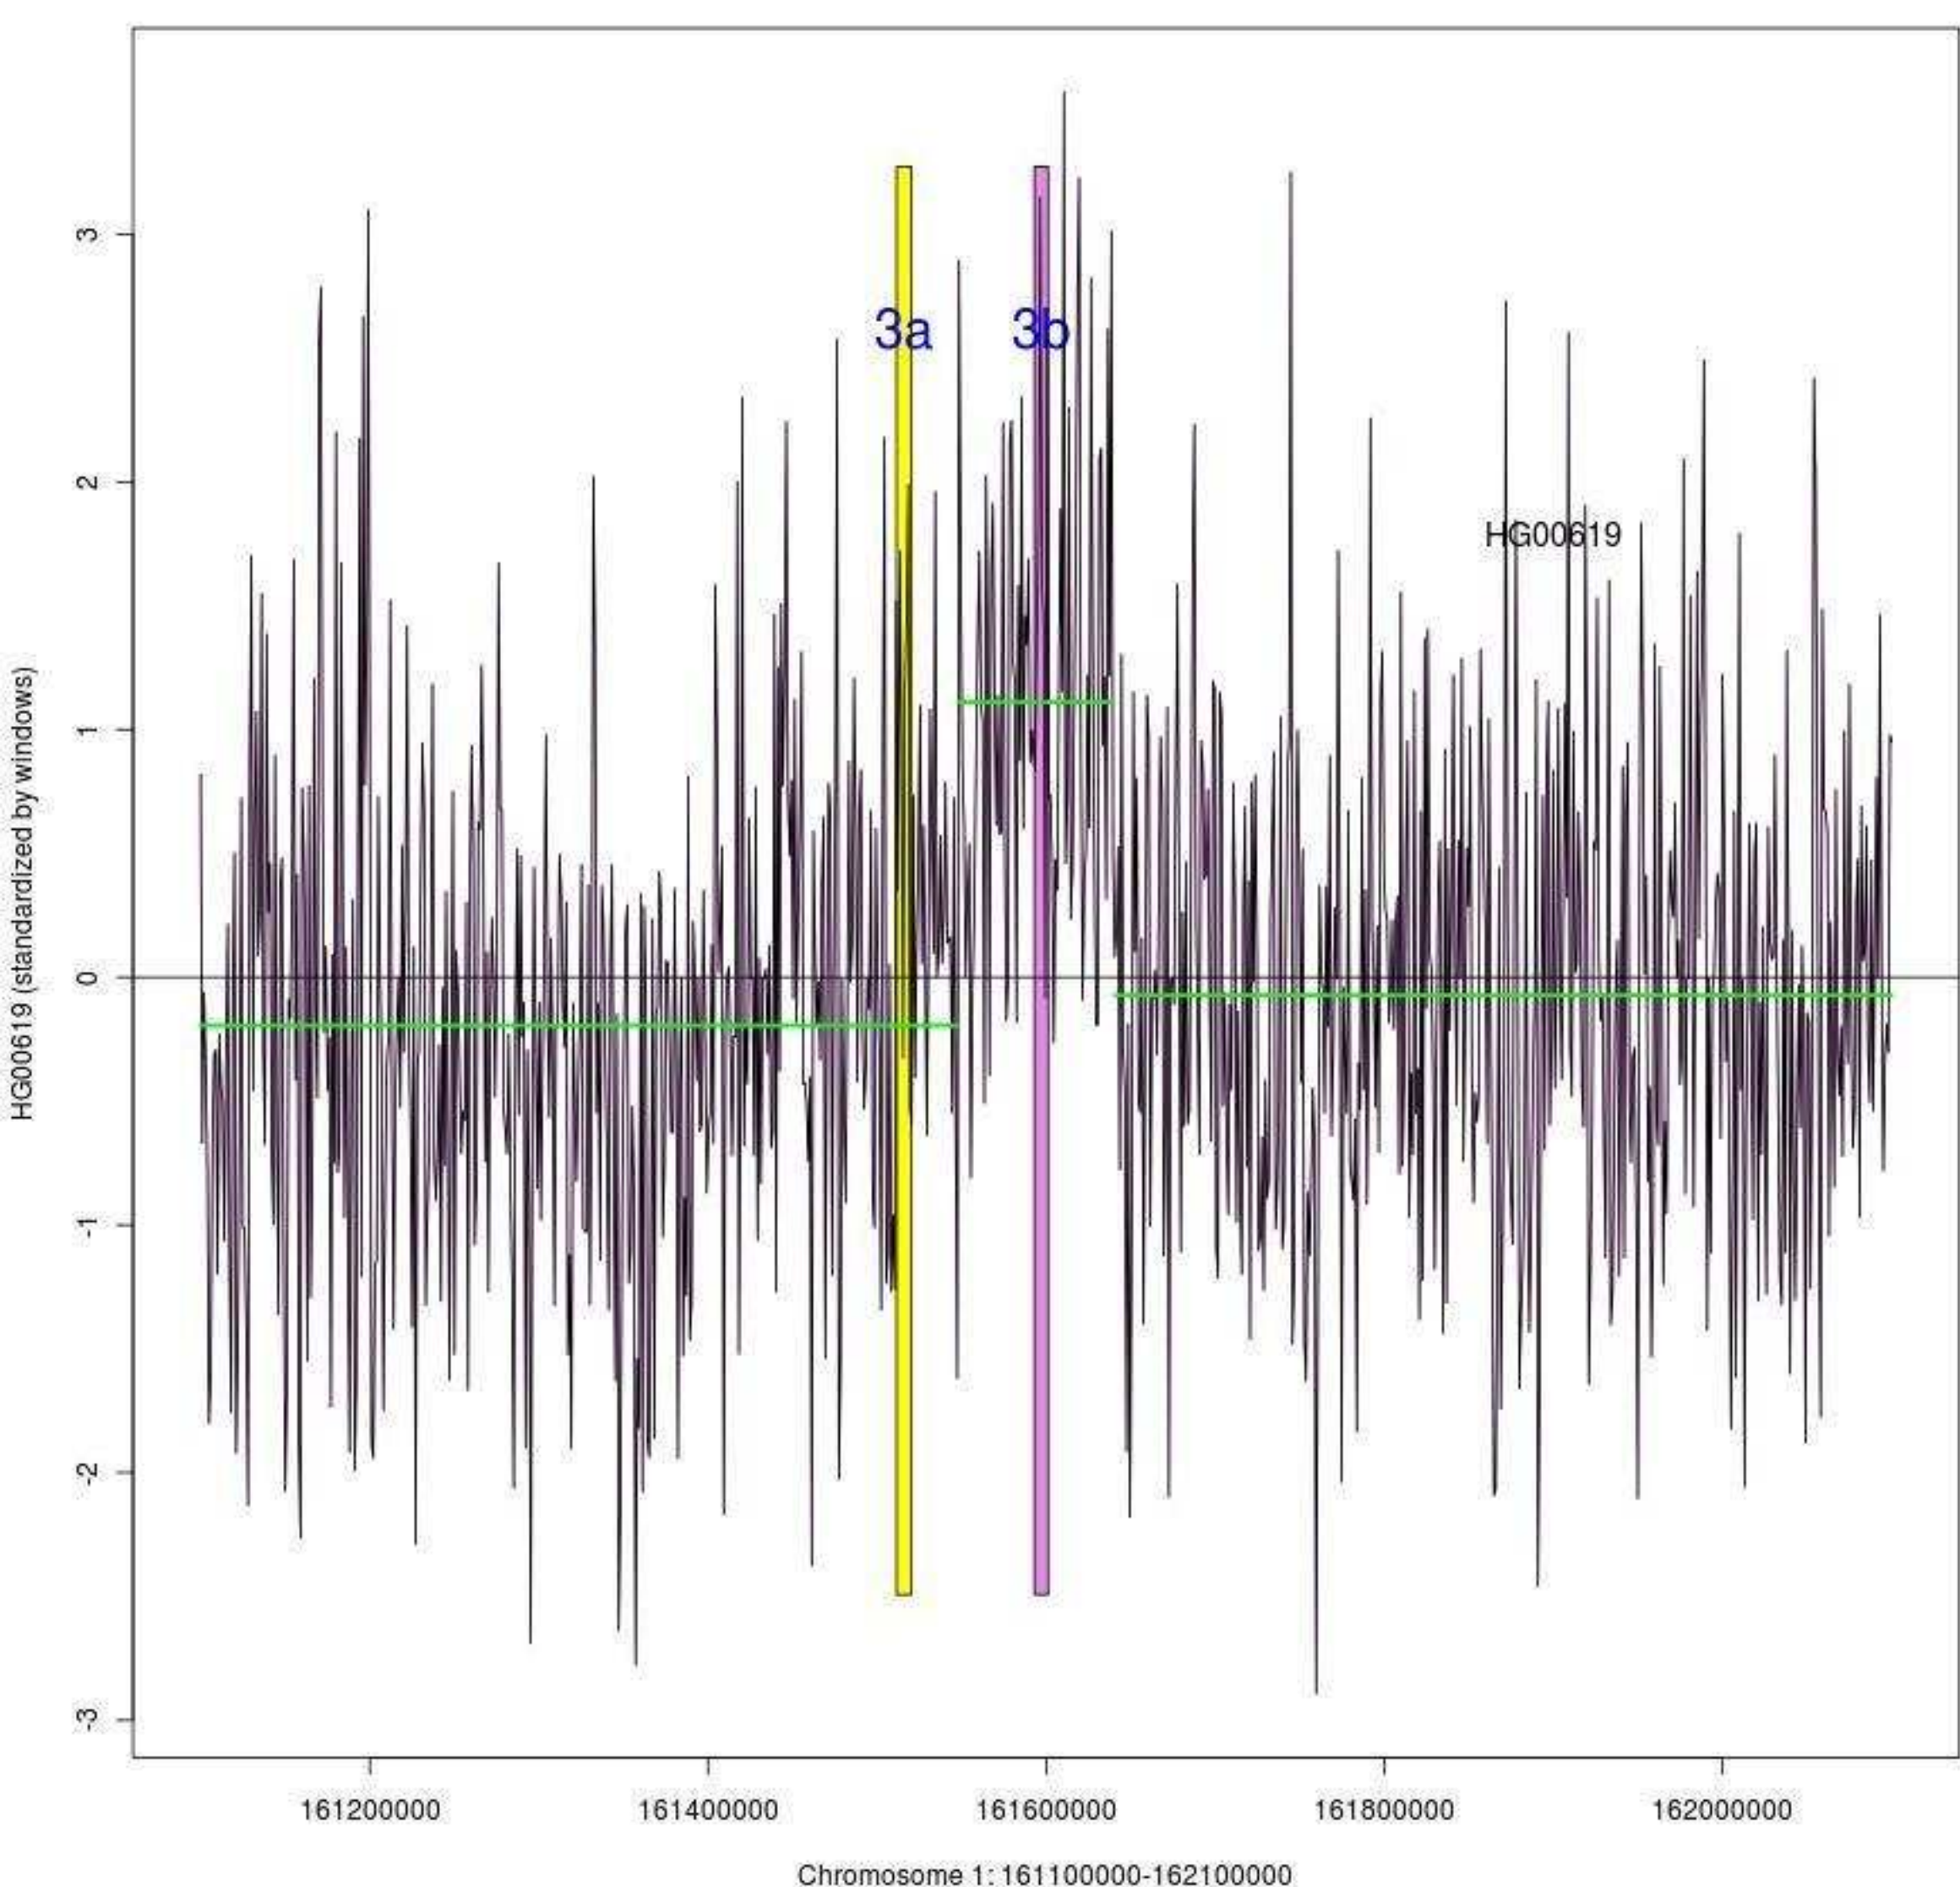



HG00650

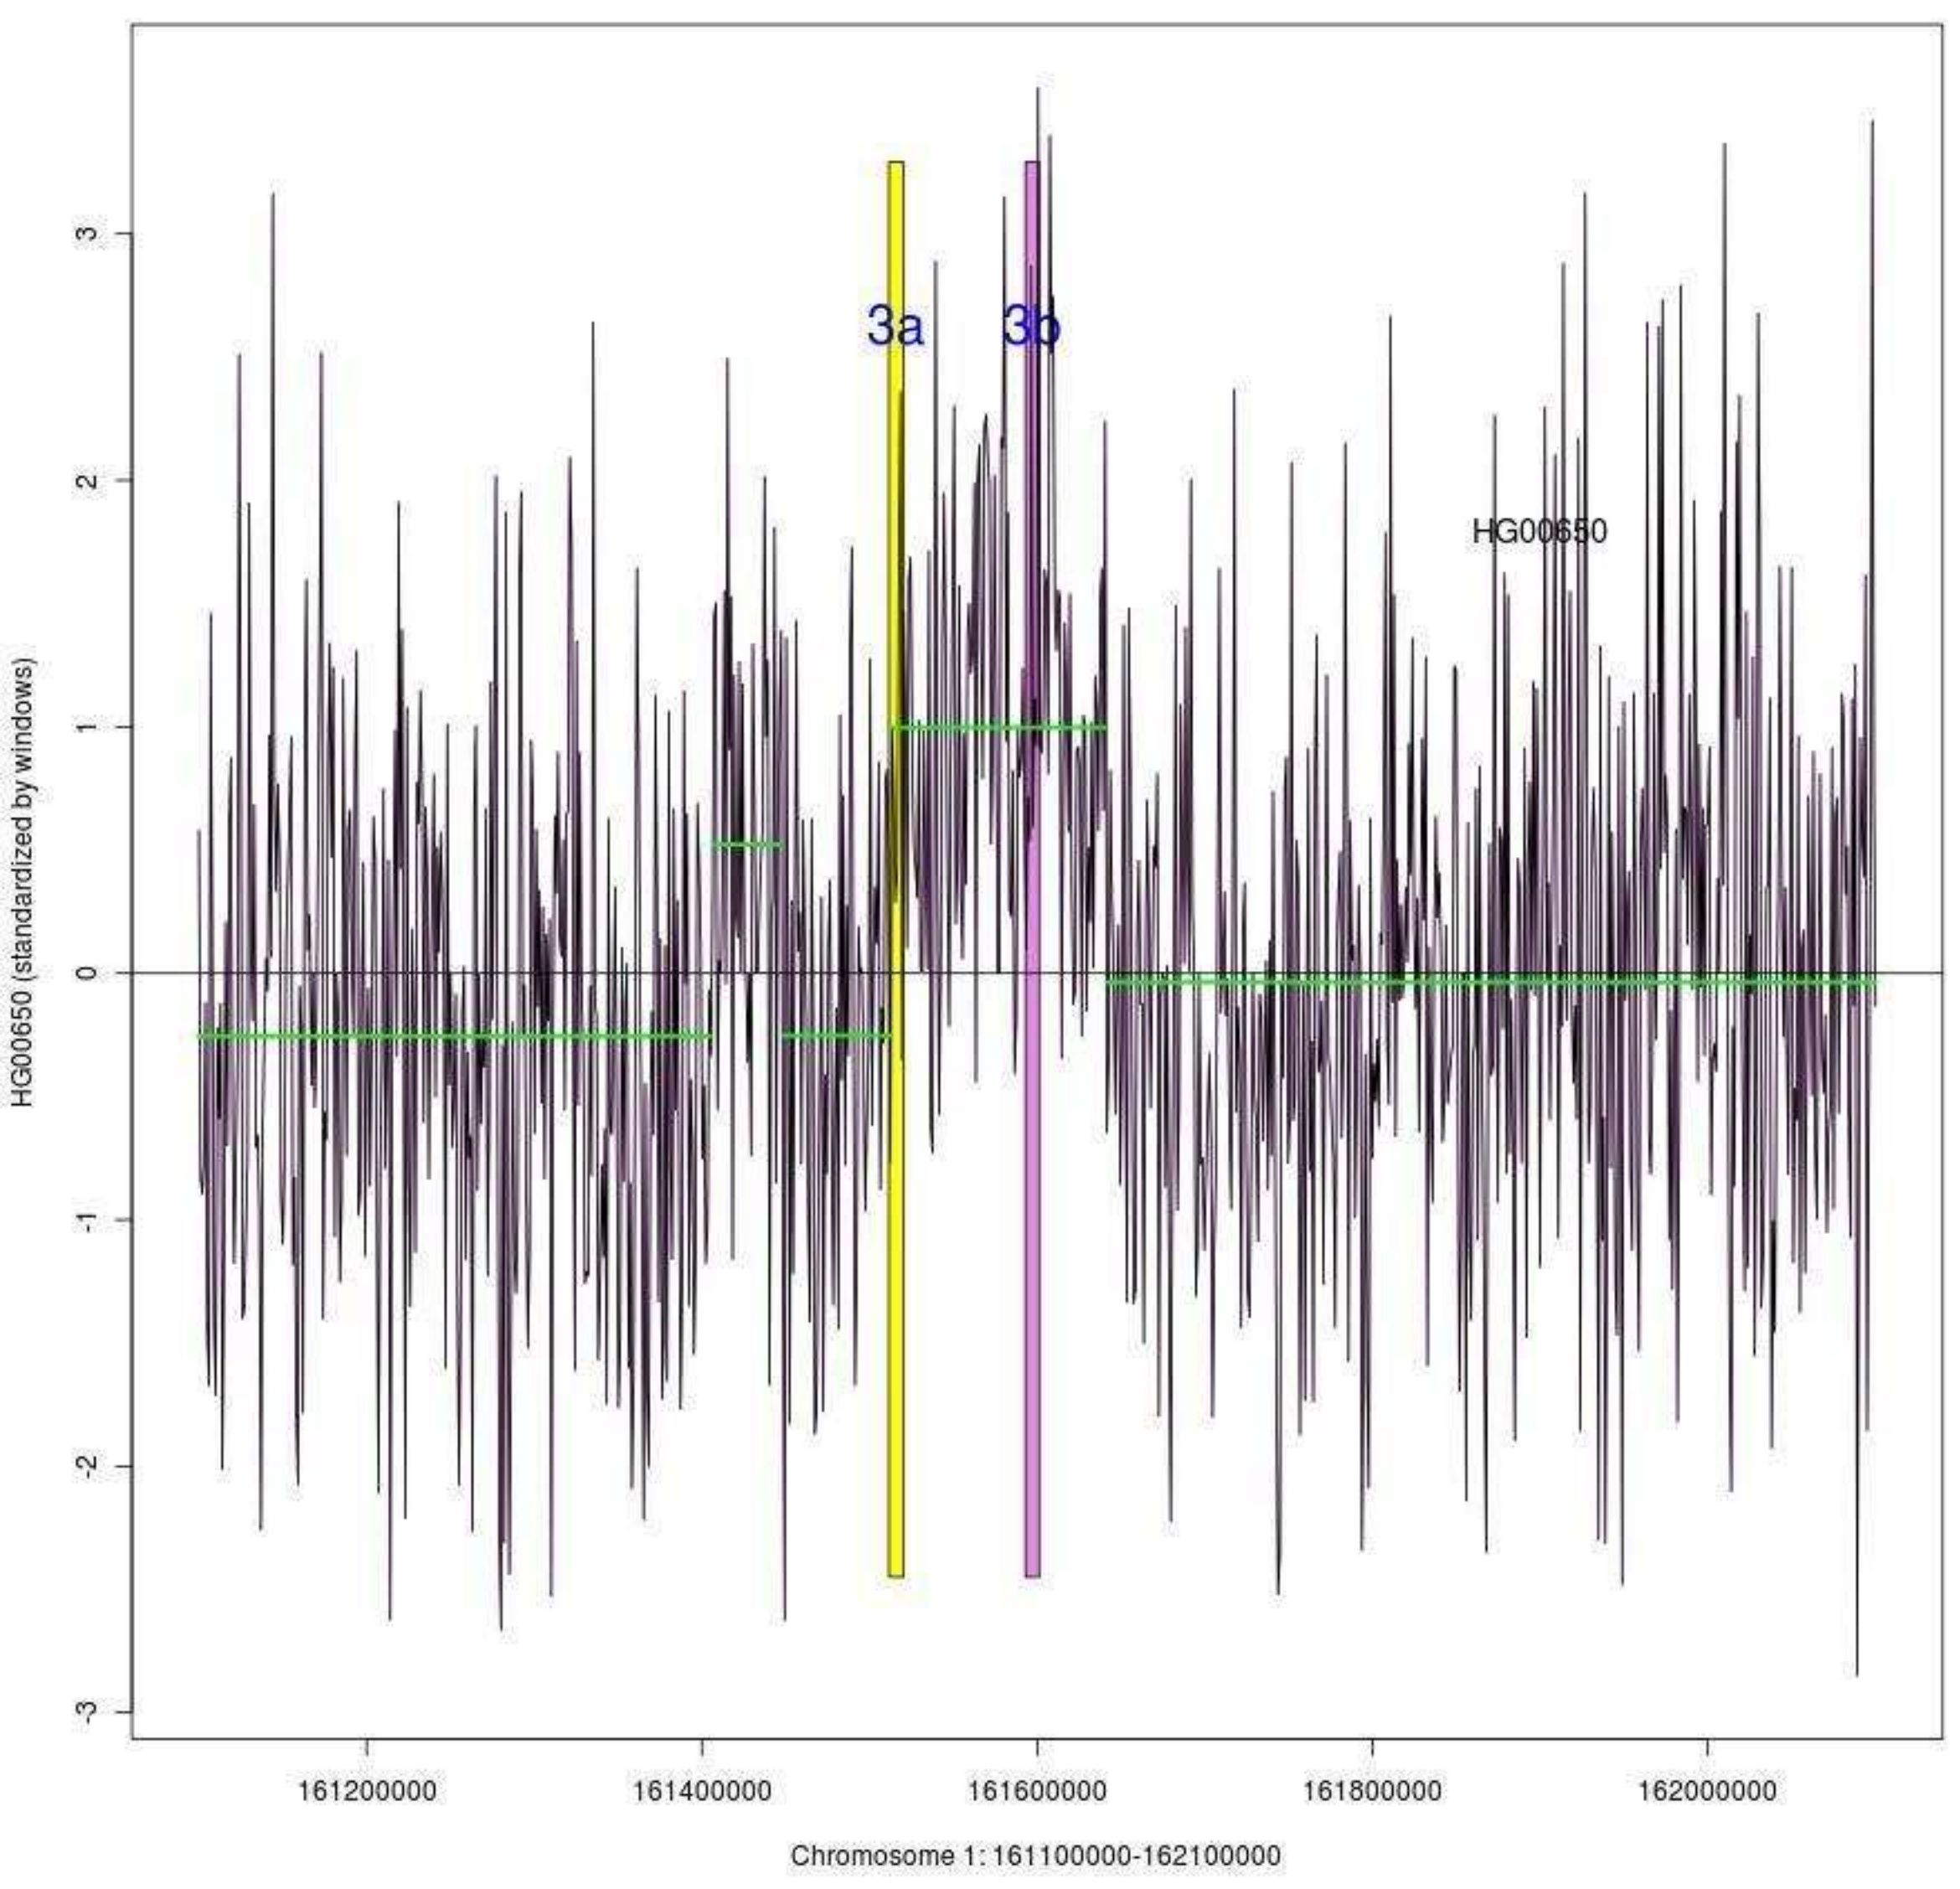

HG00654

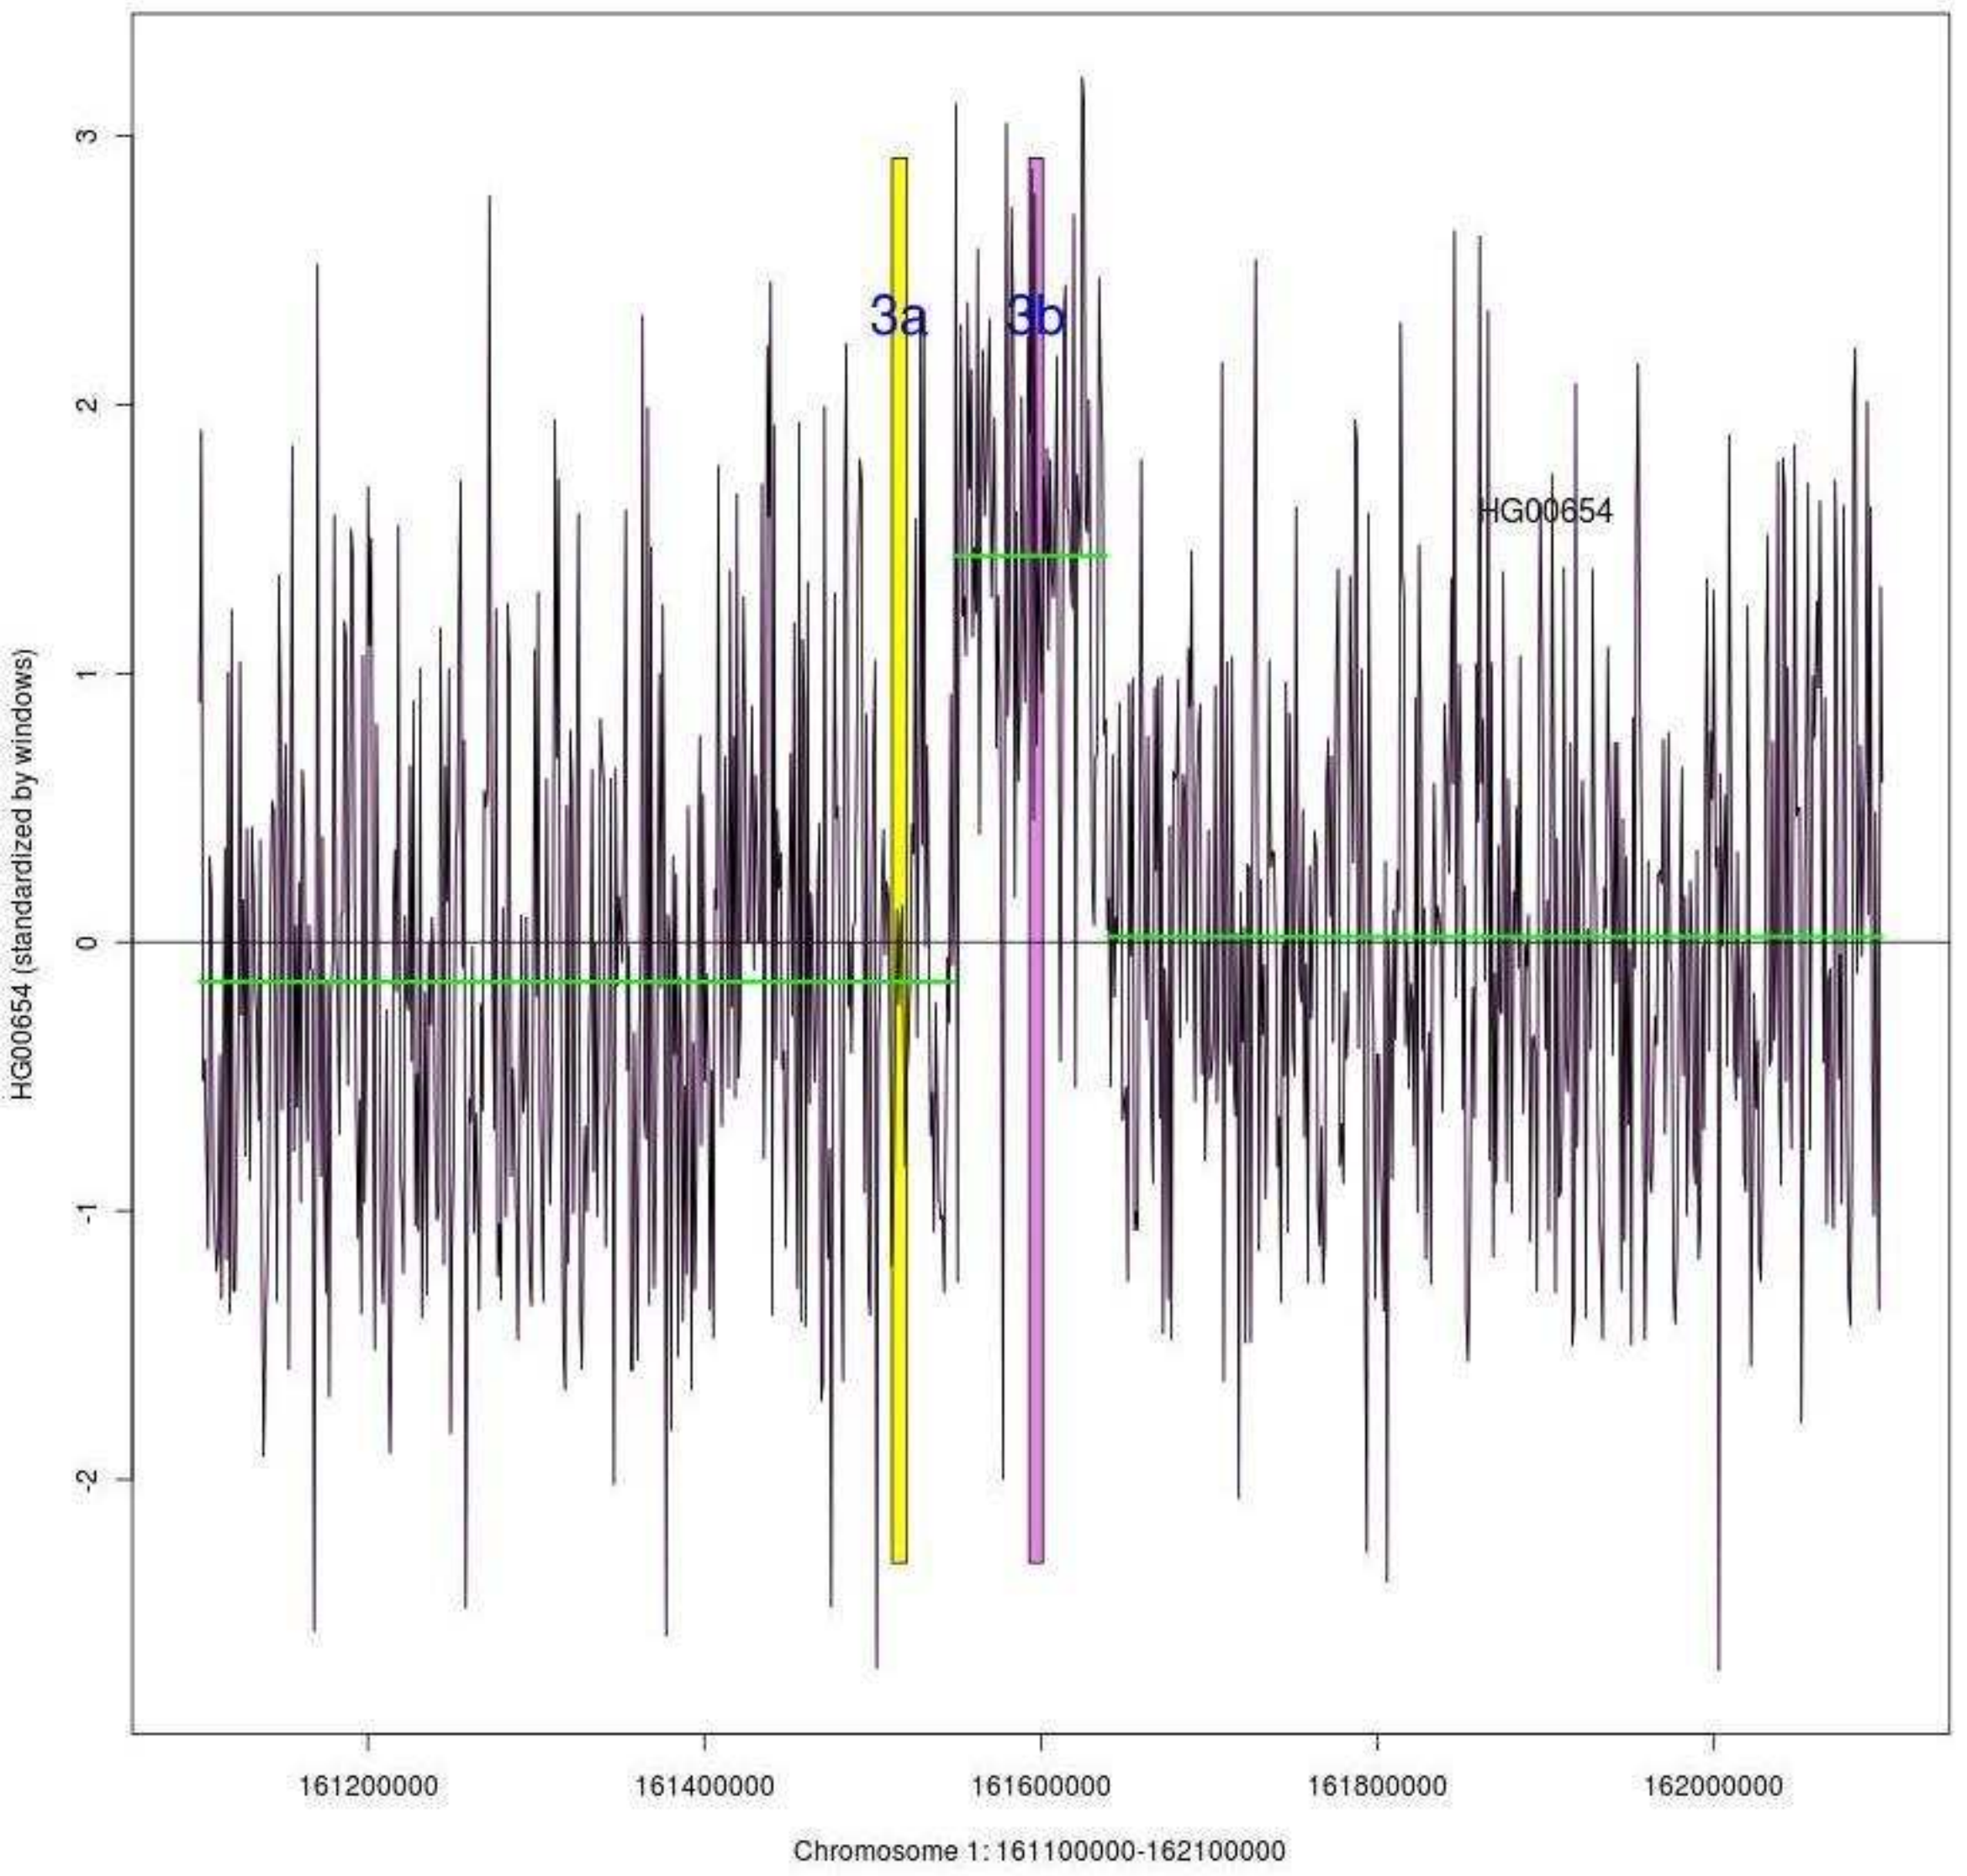

HG00704

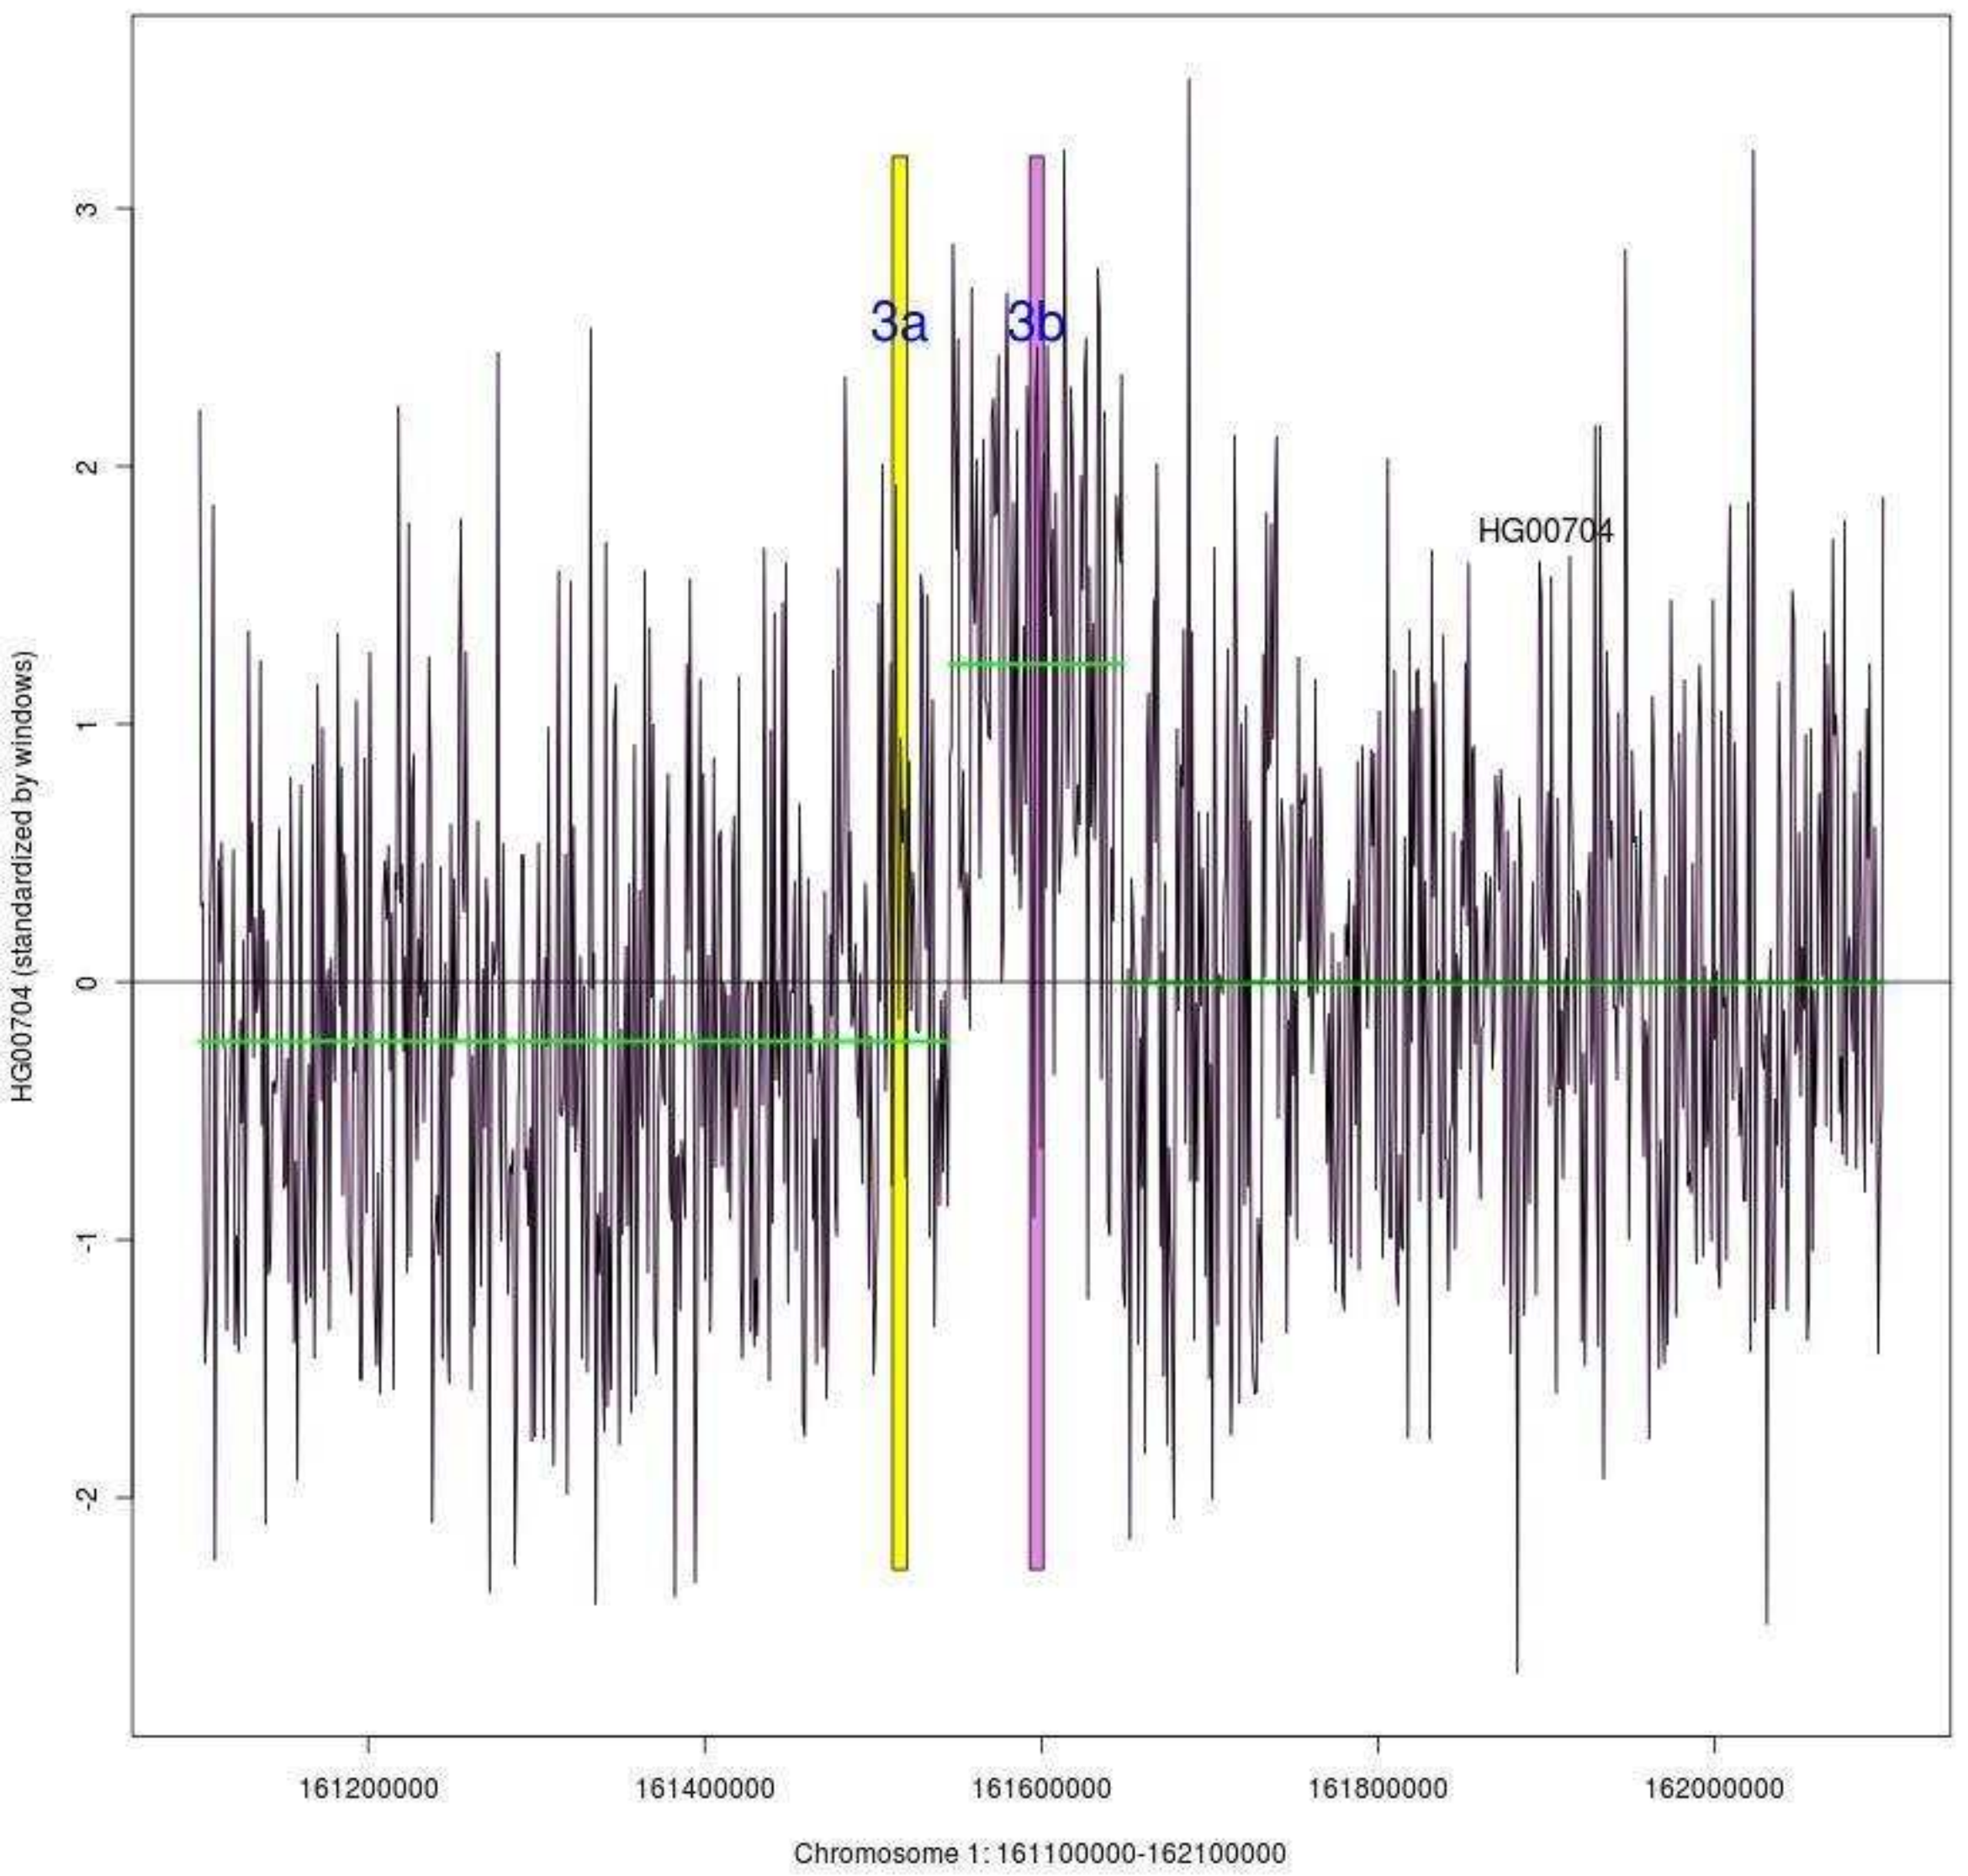



HG00705

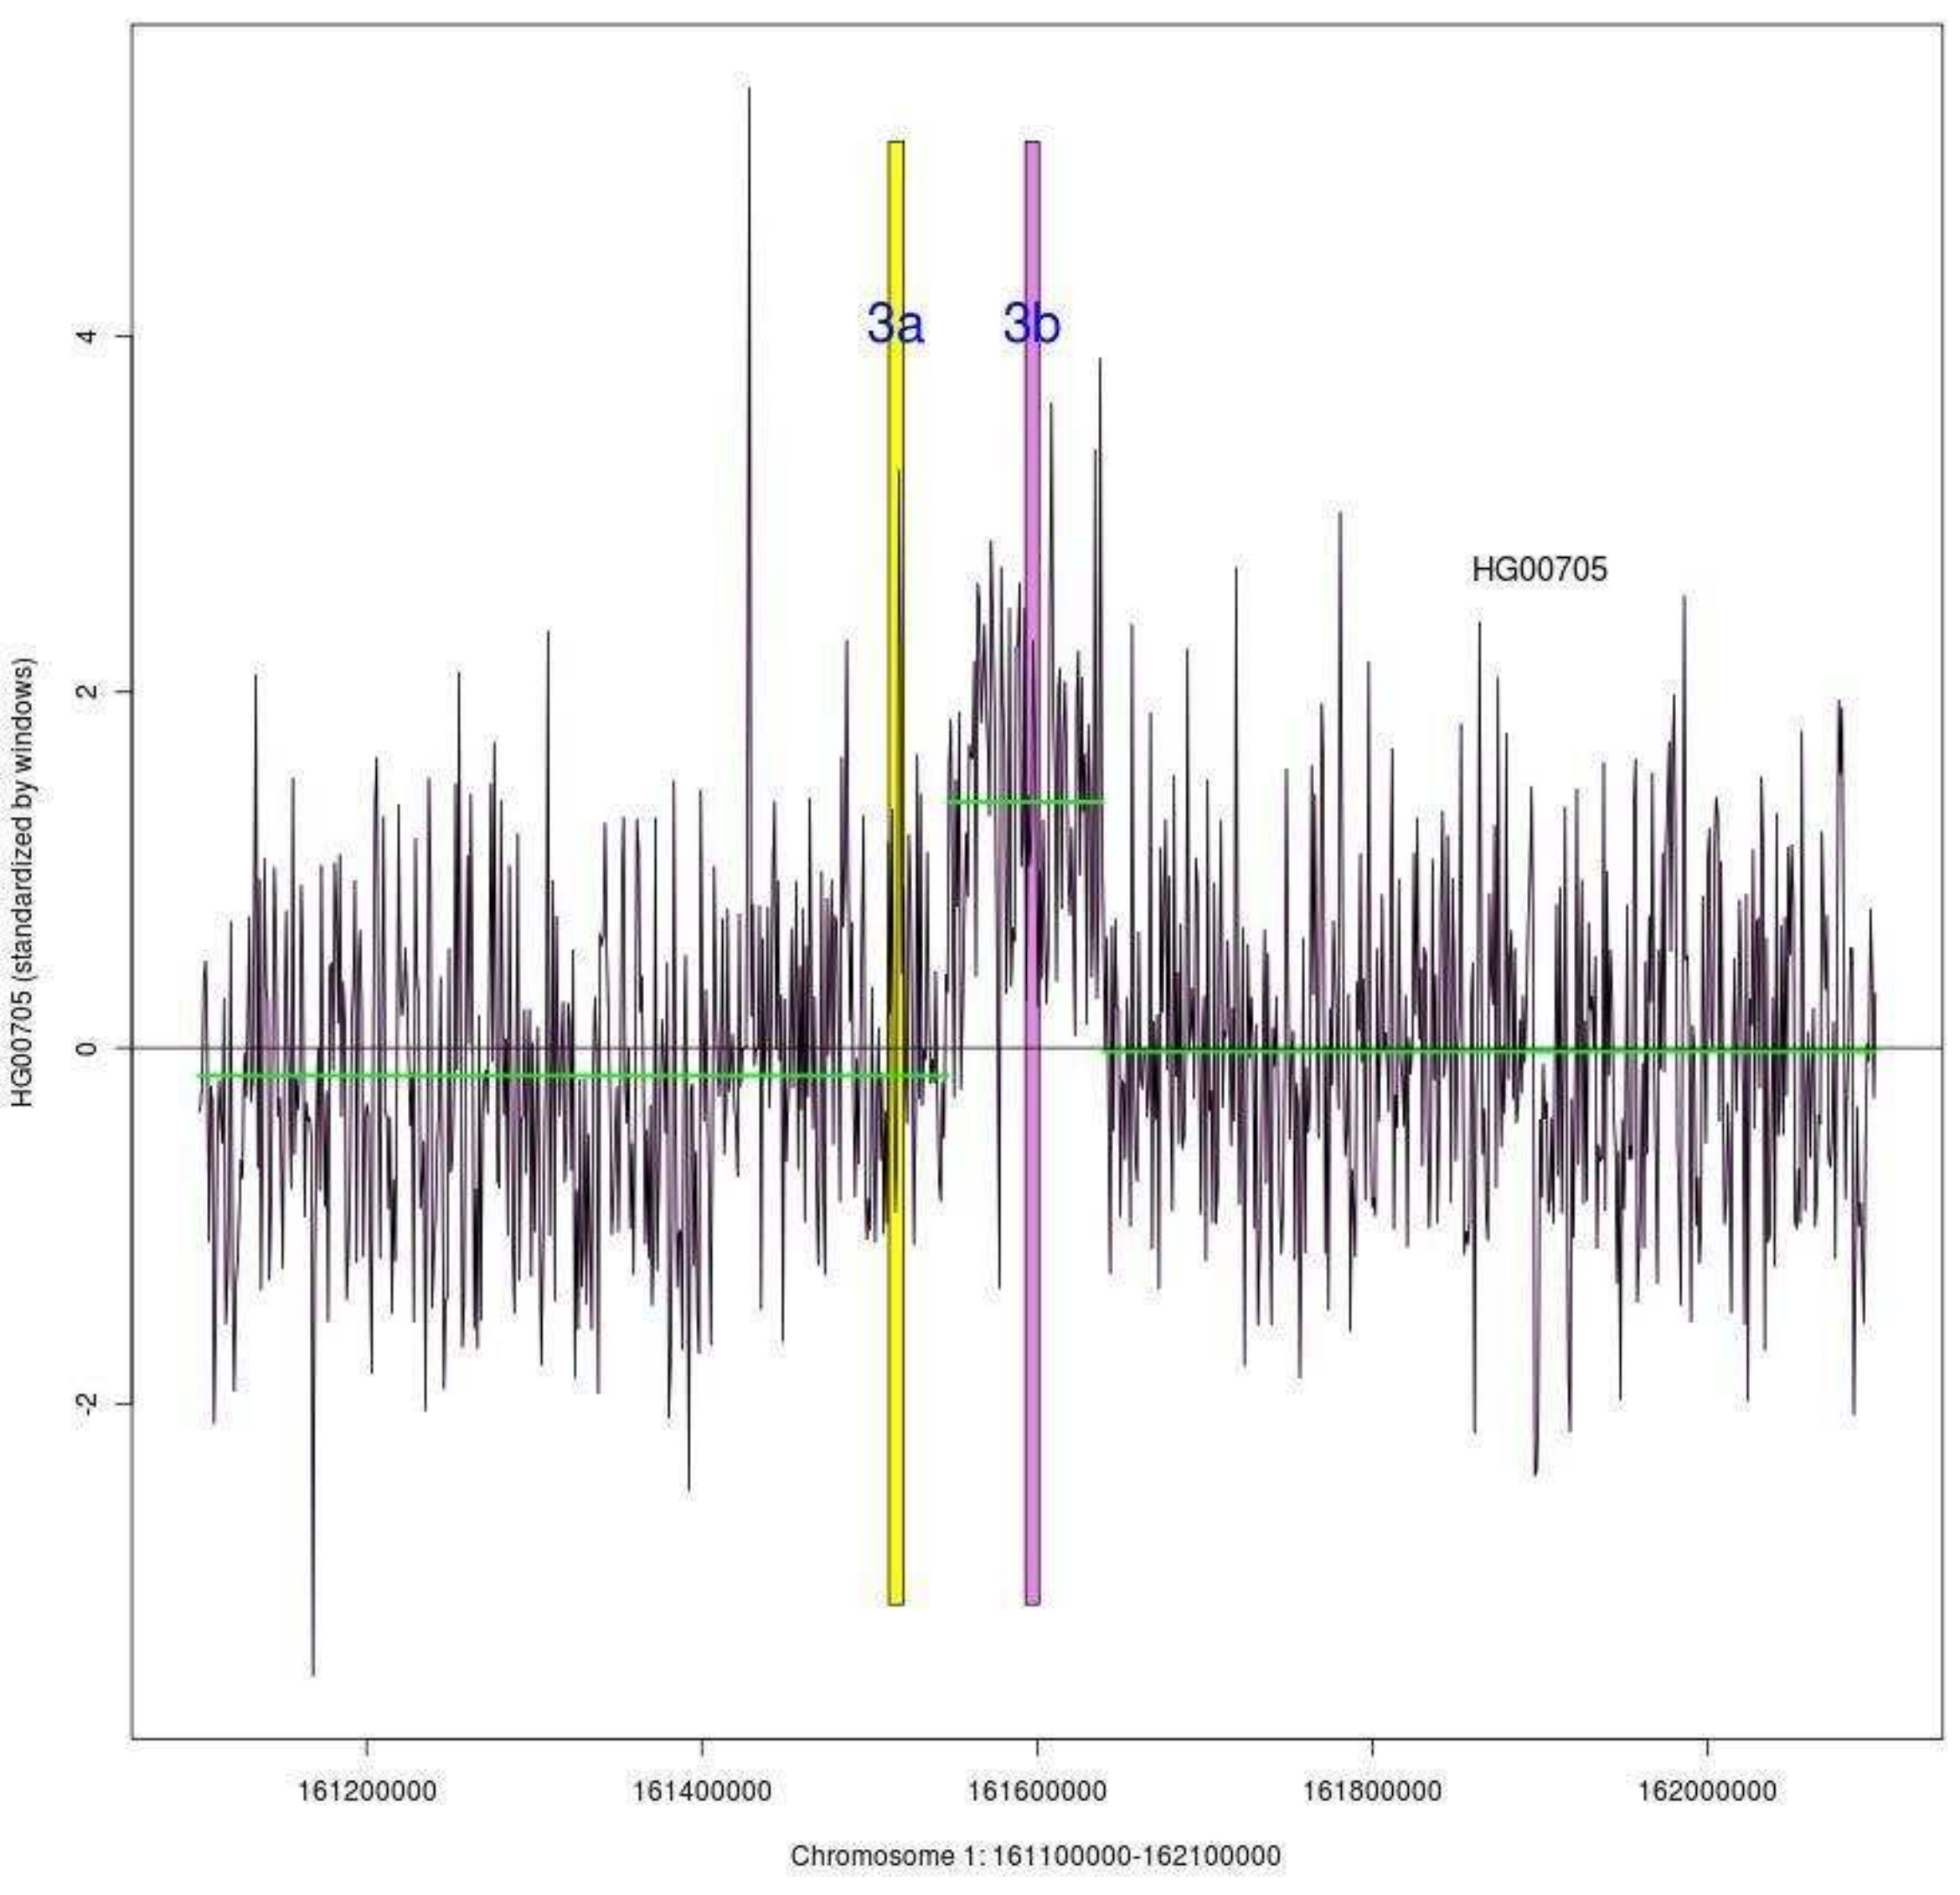

NA18526

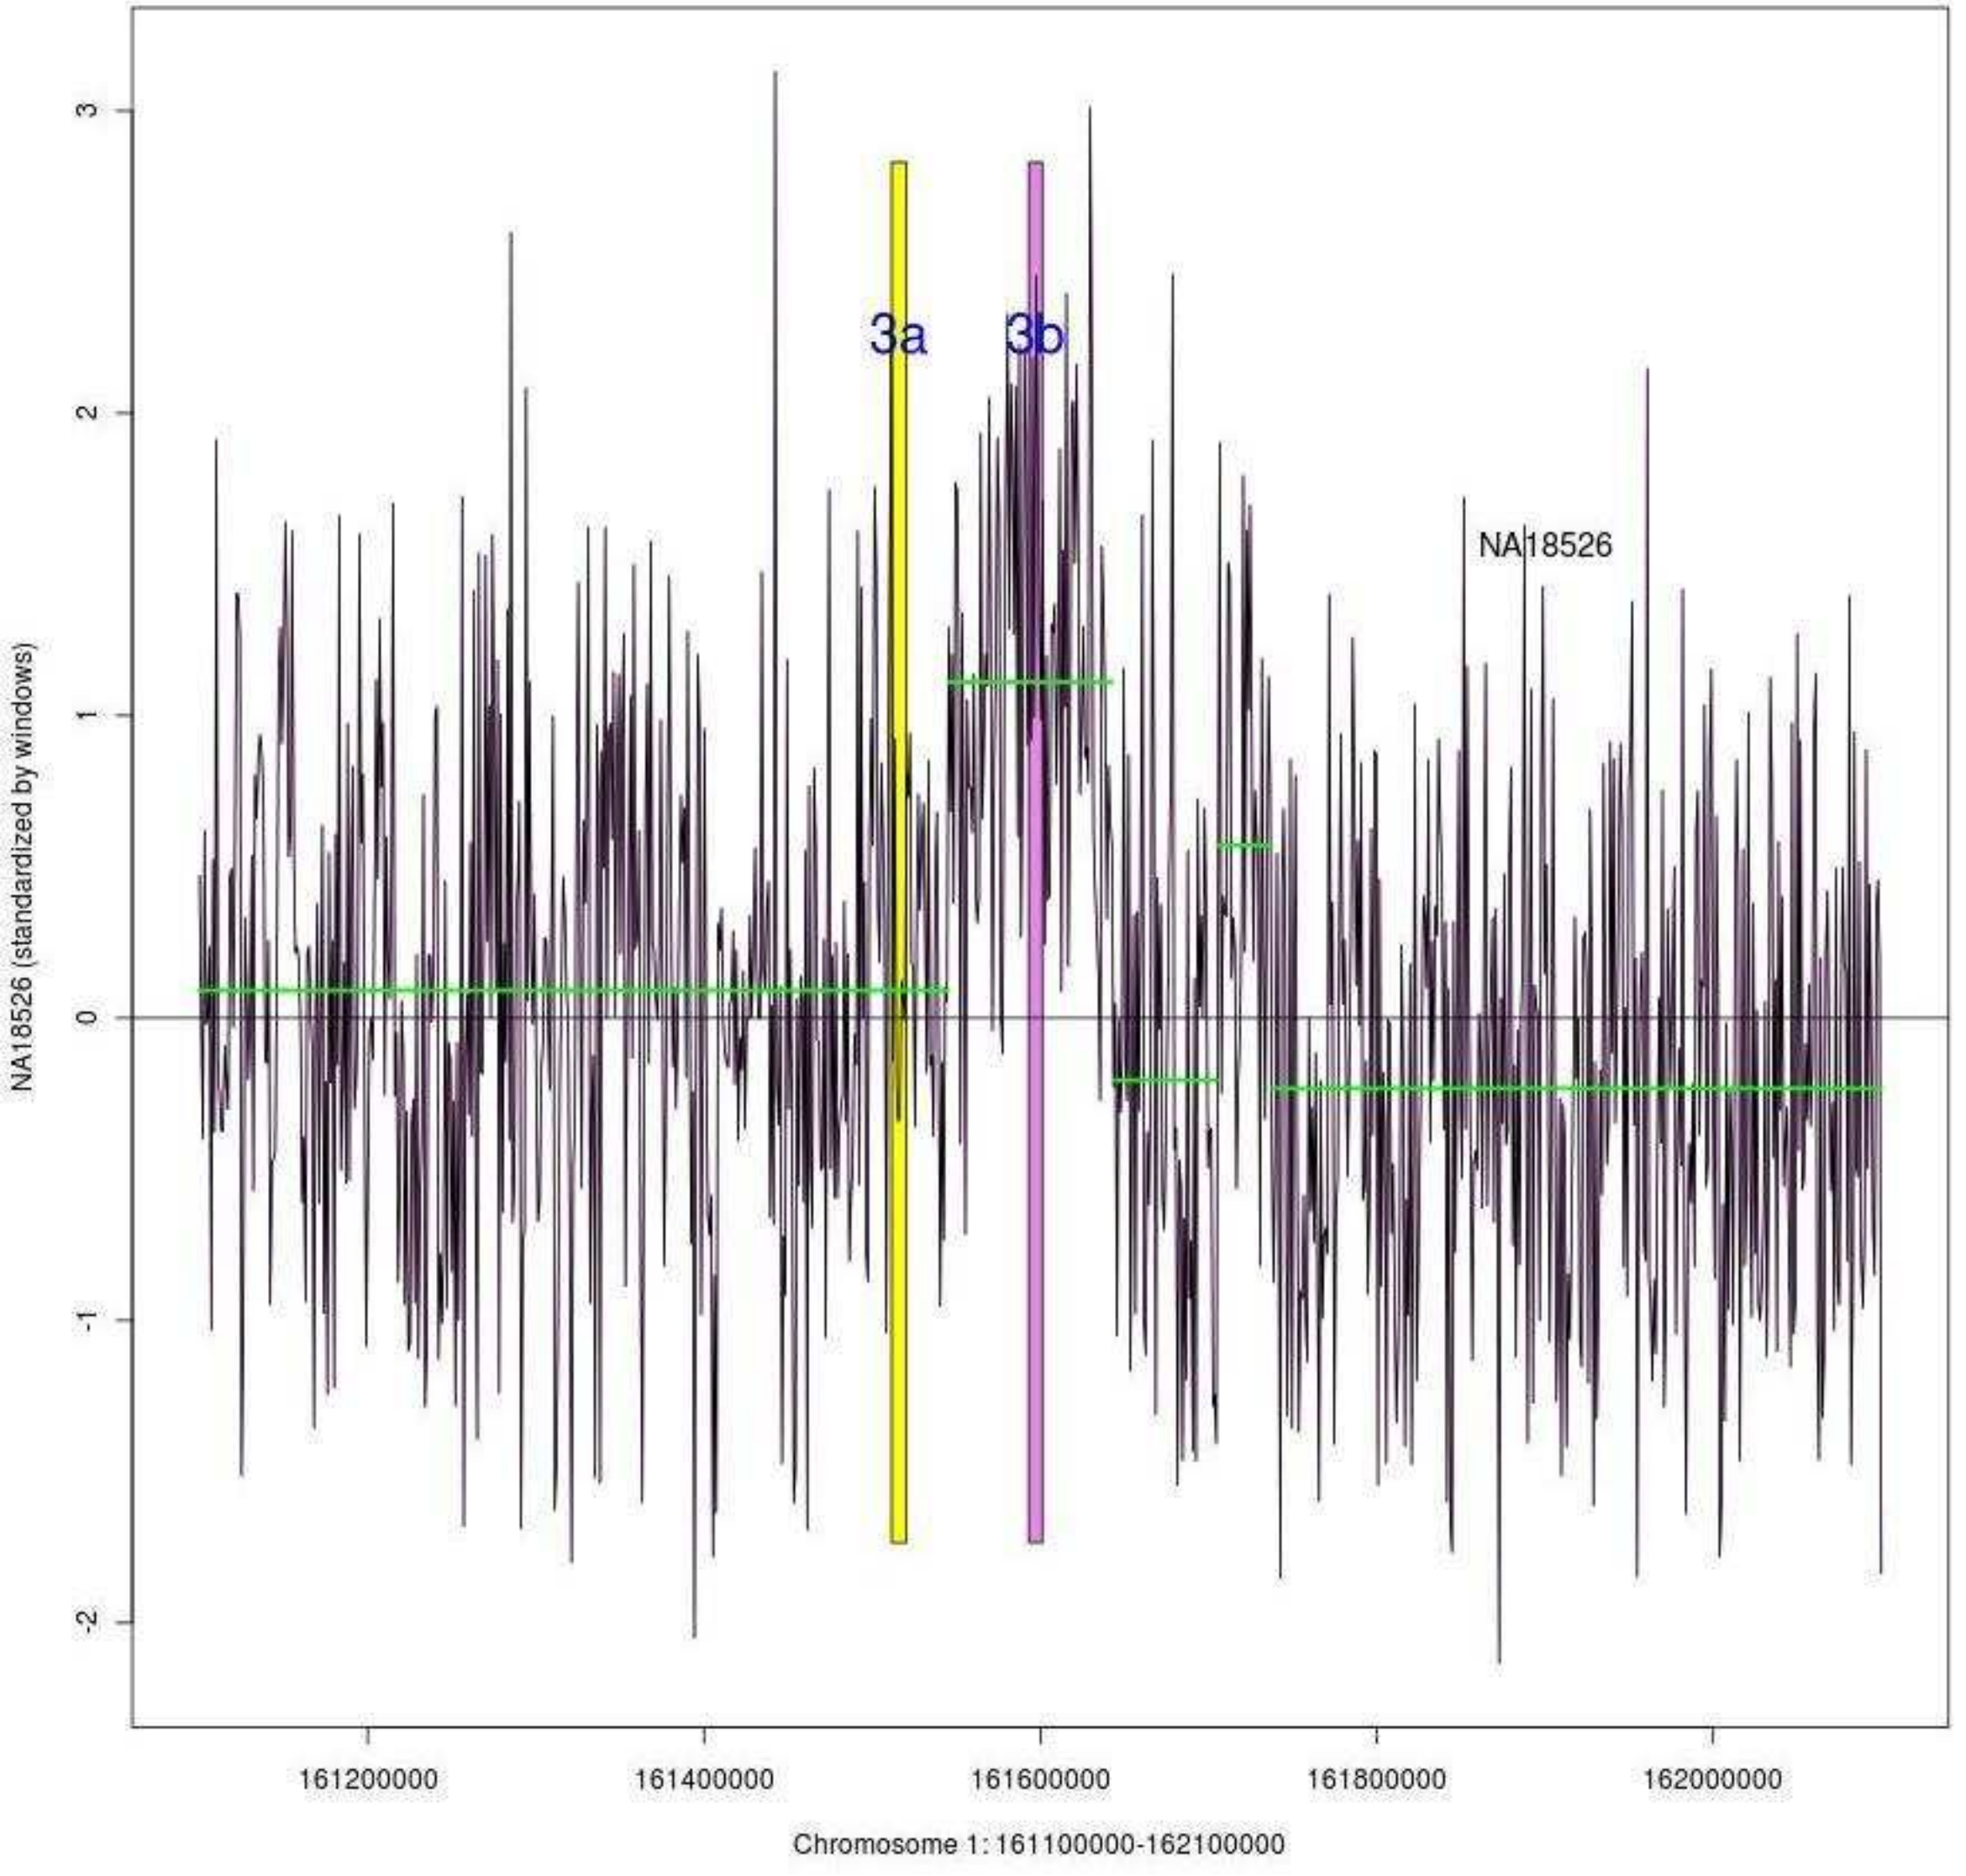

NA18545

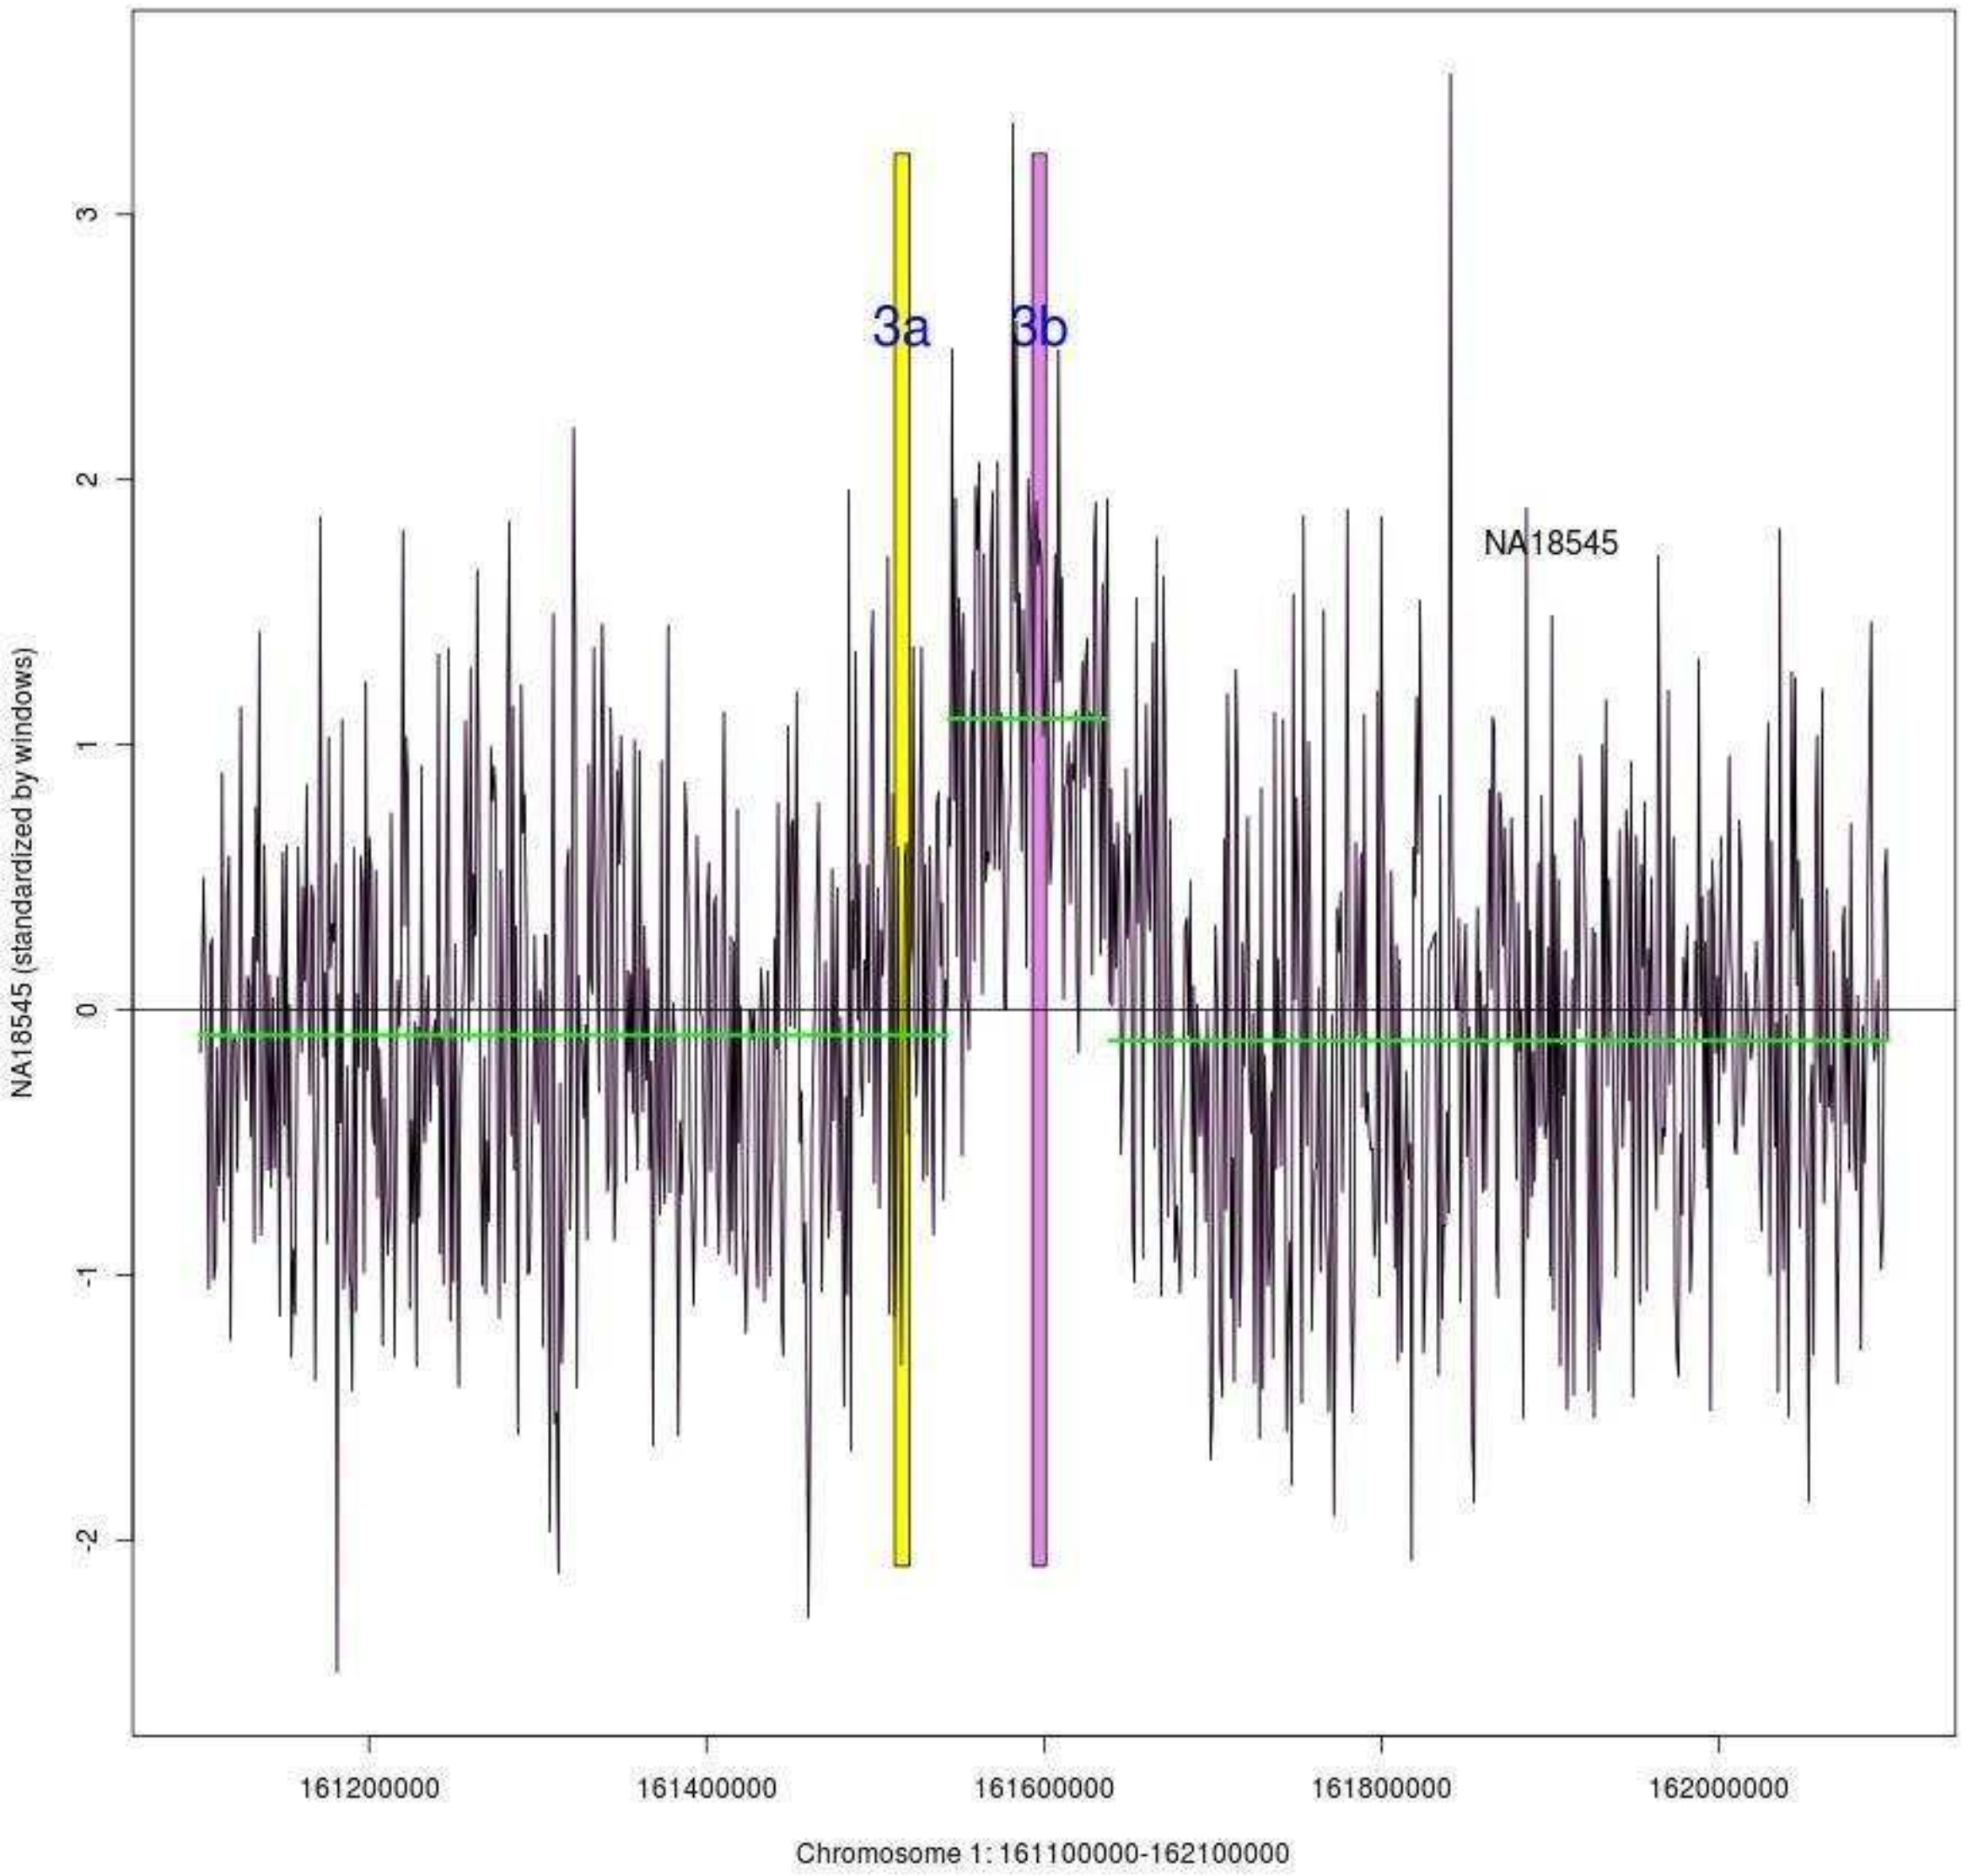



NA18571

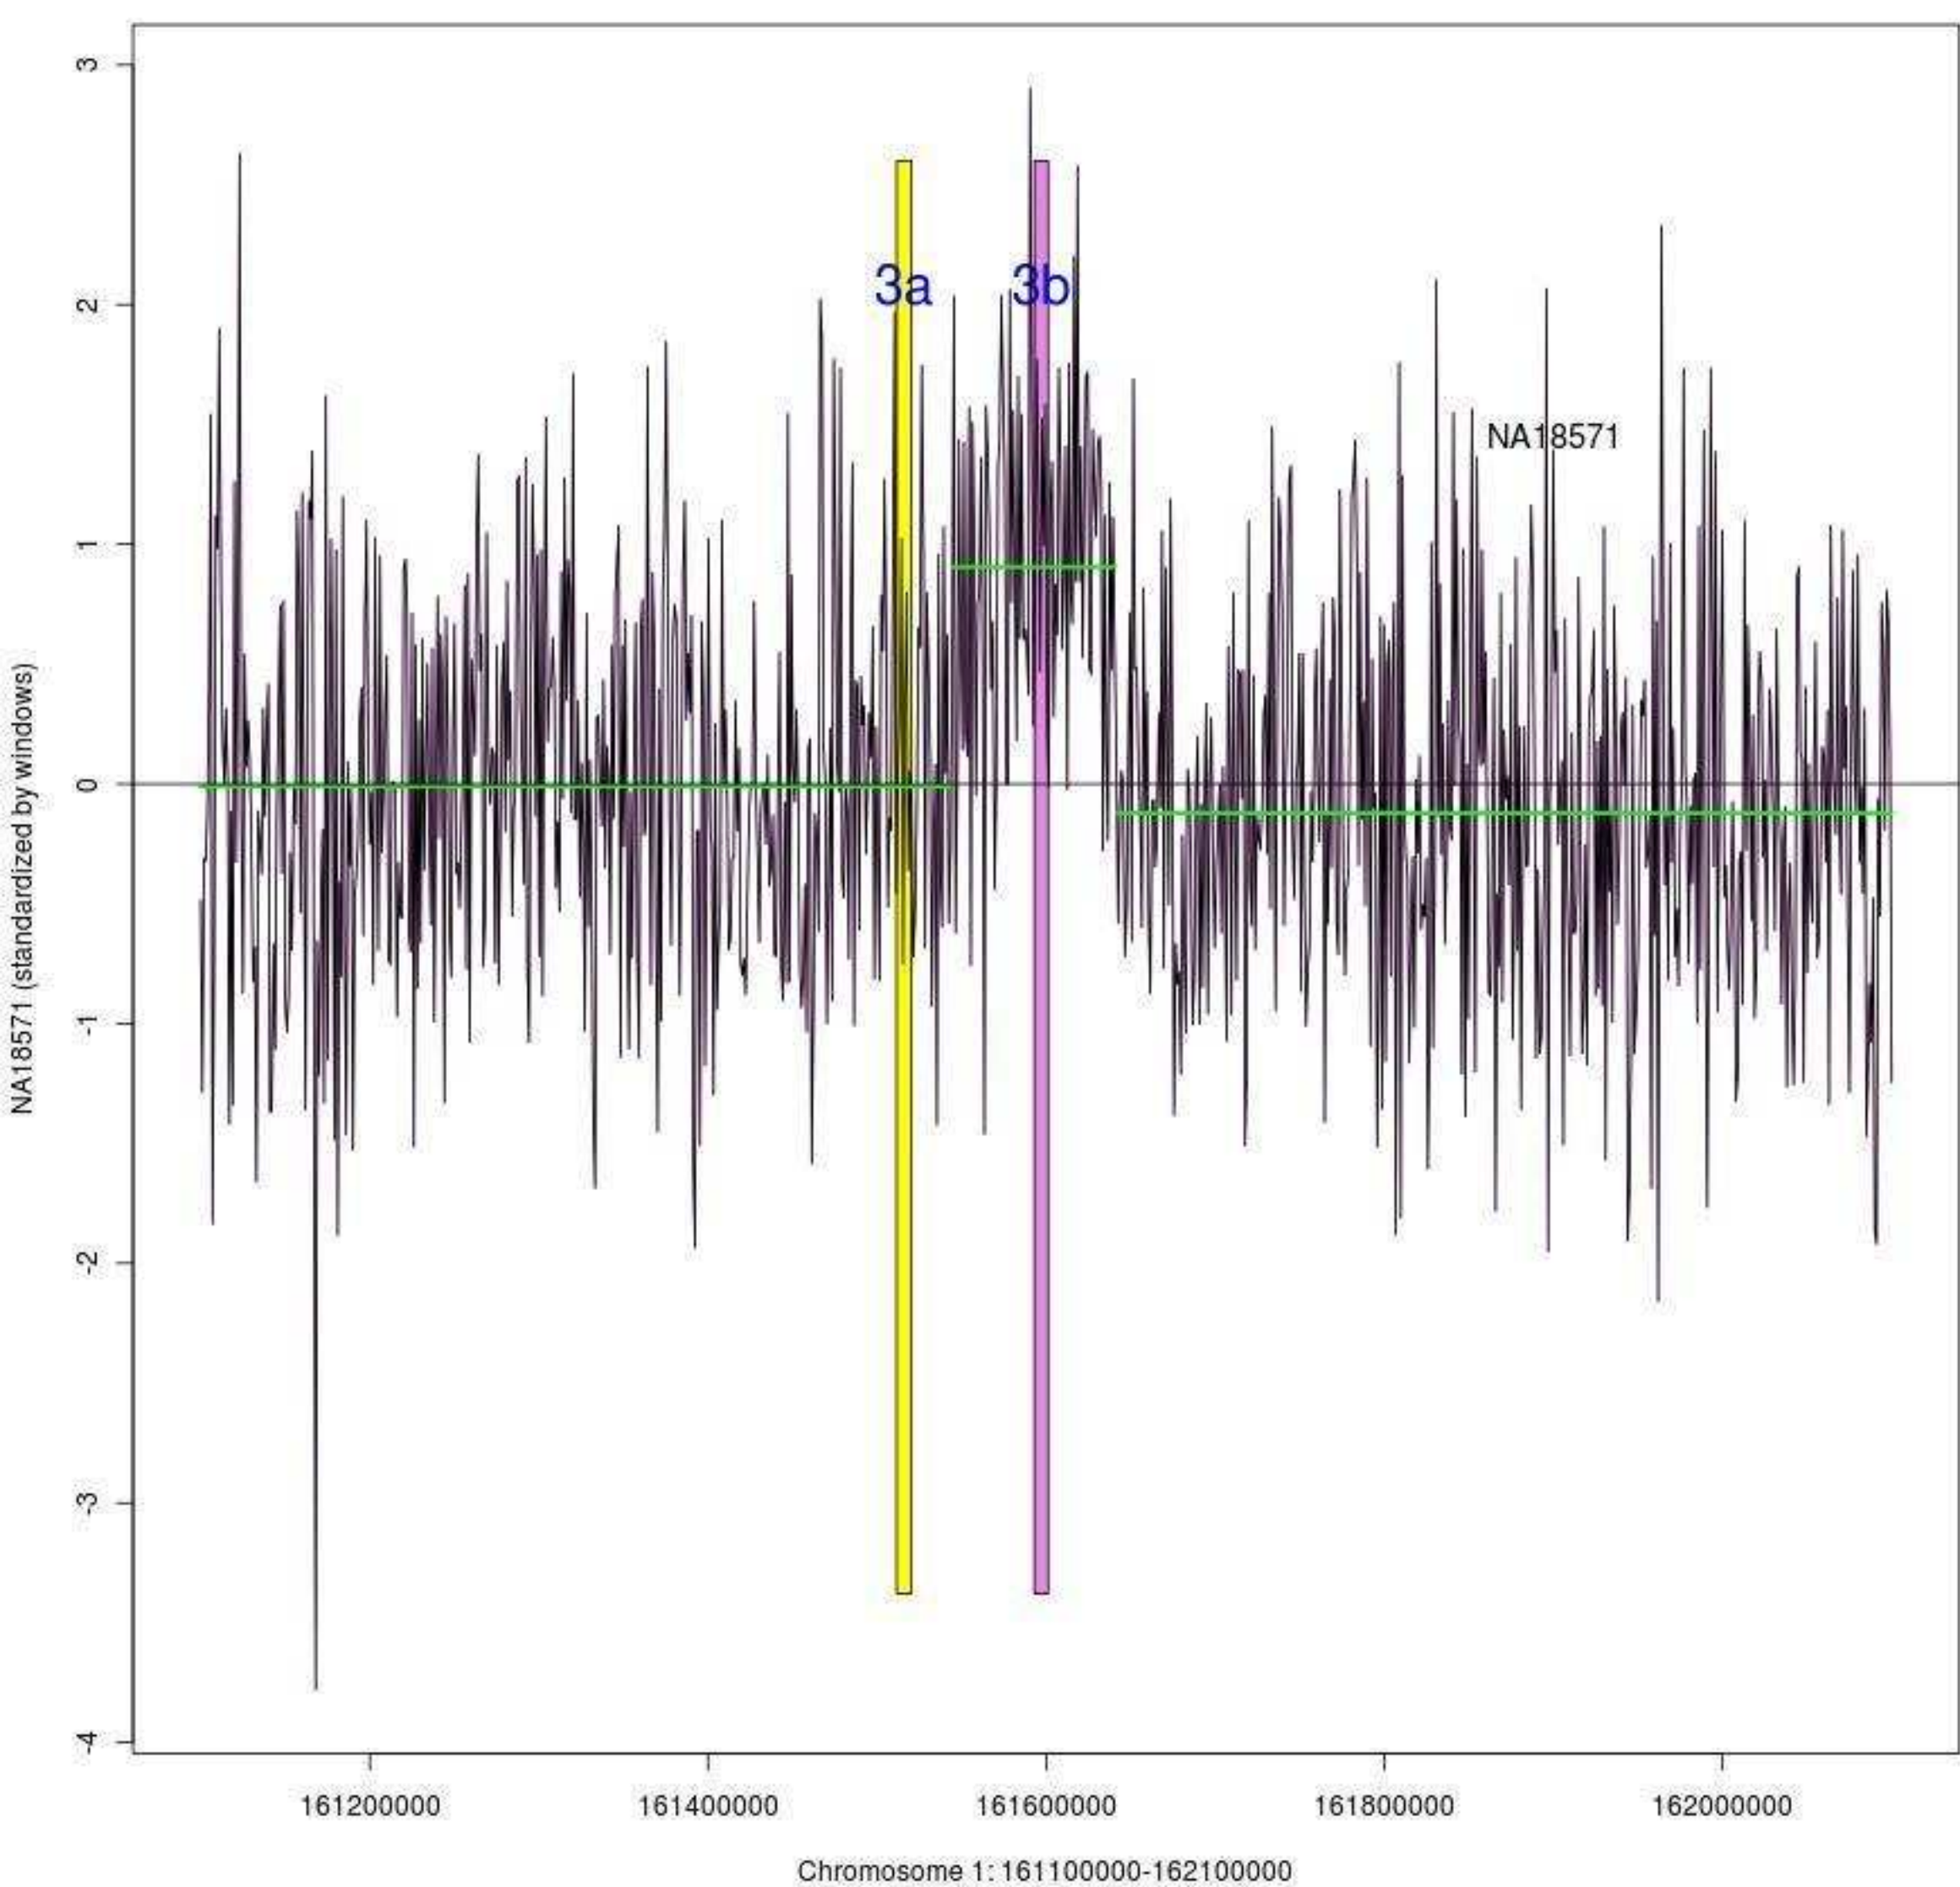

NA18602

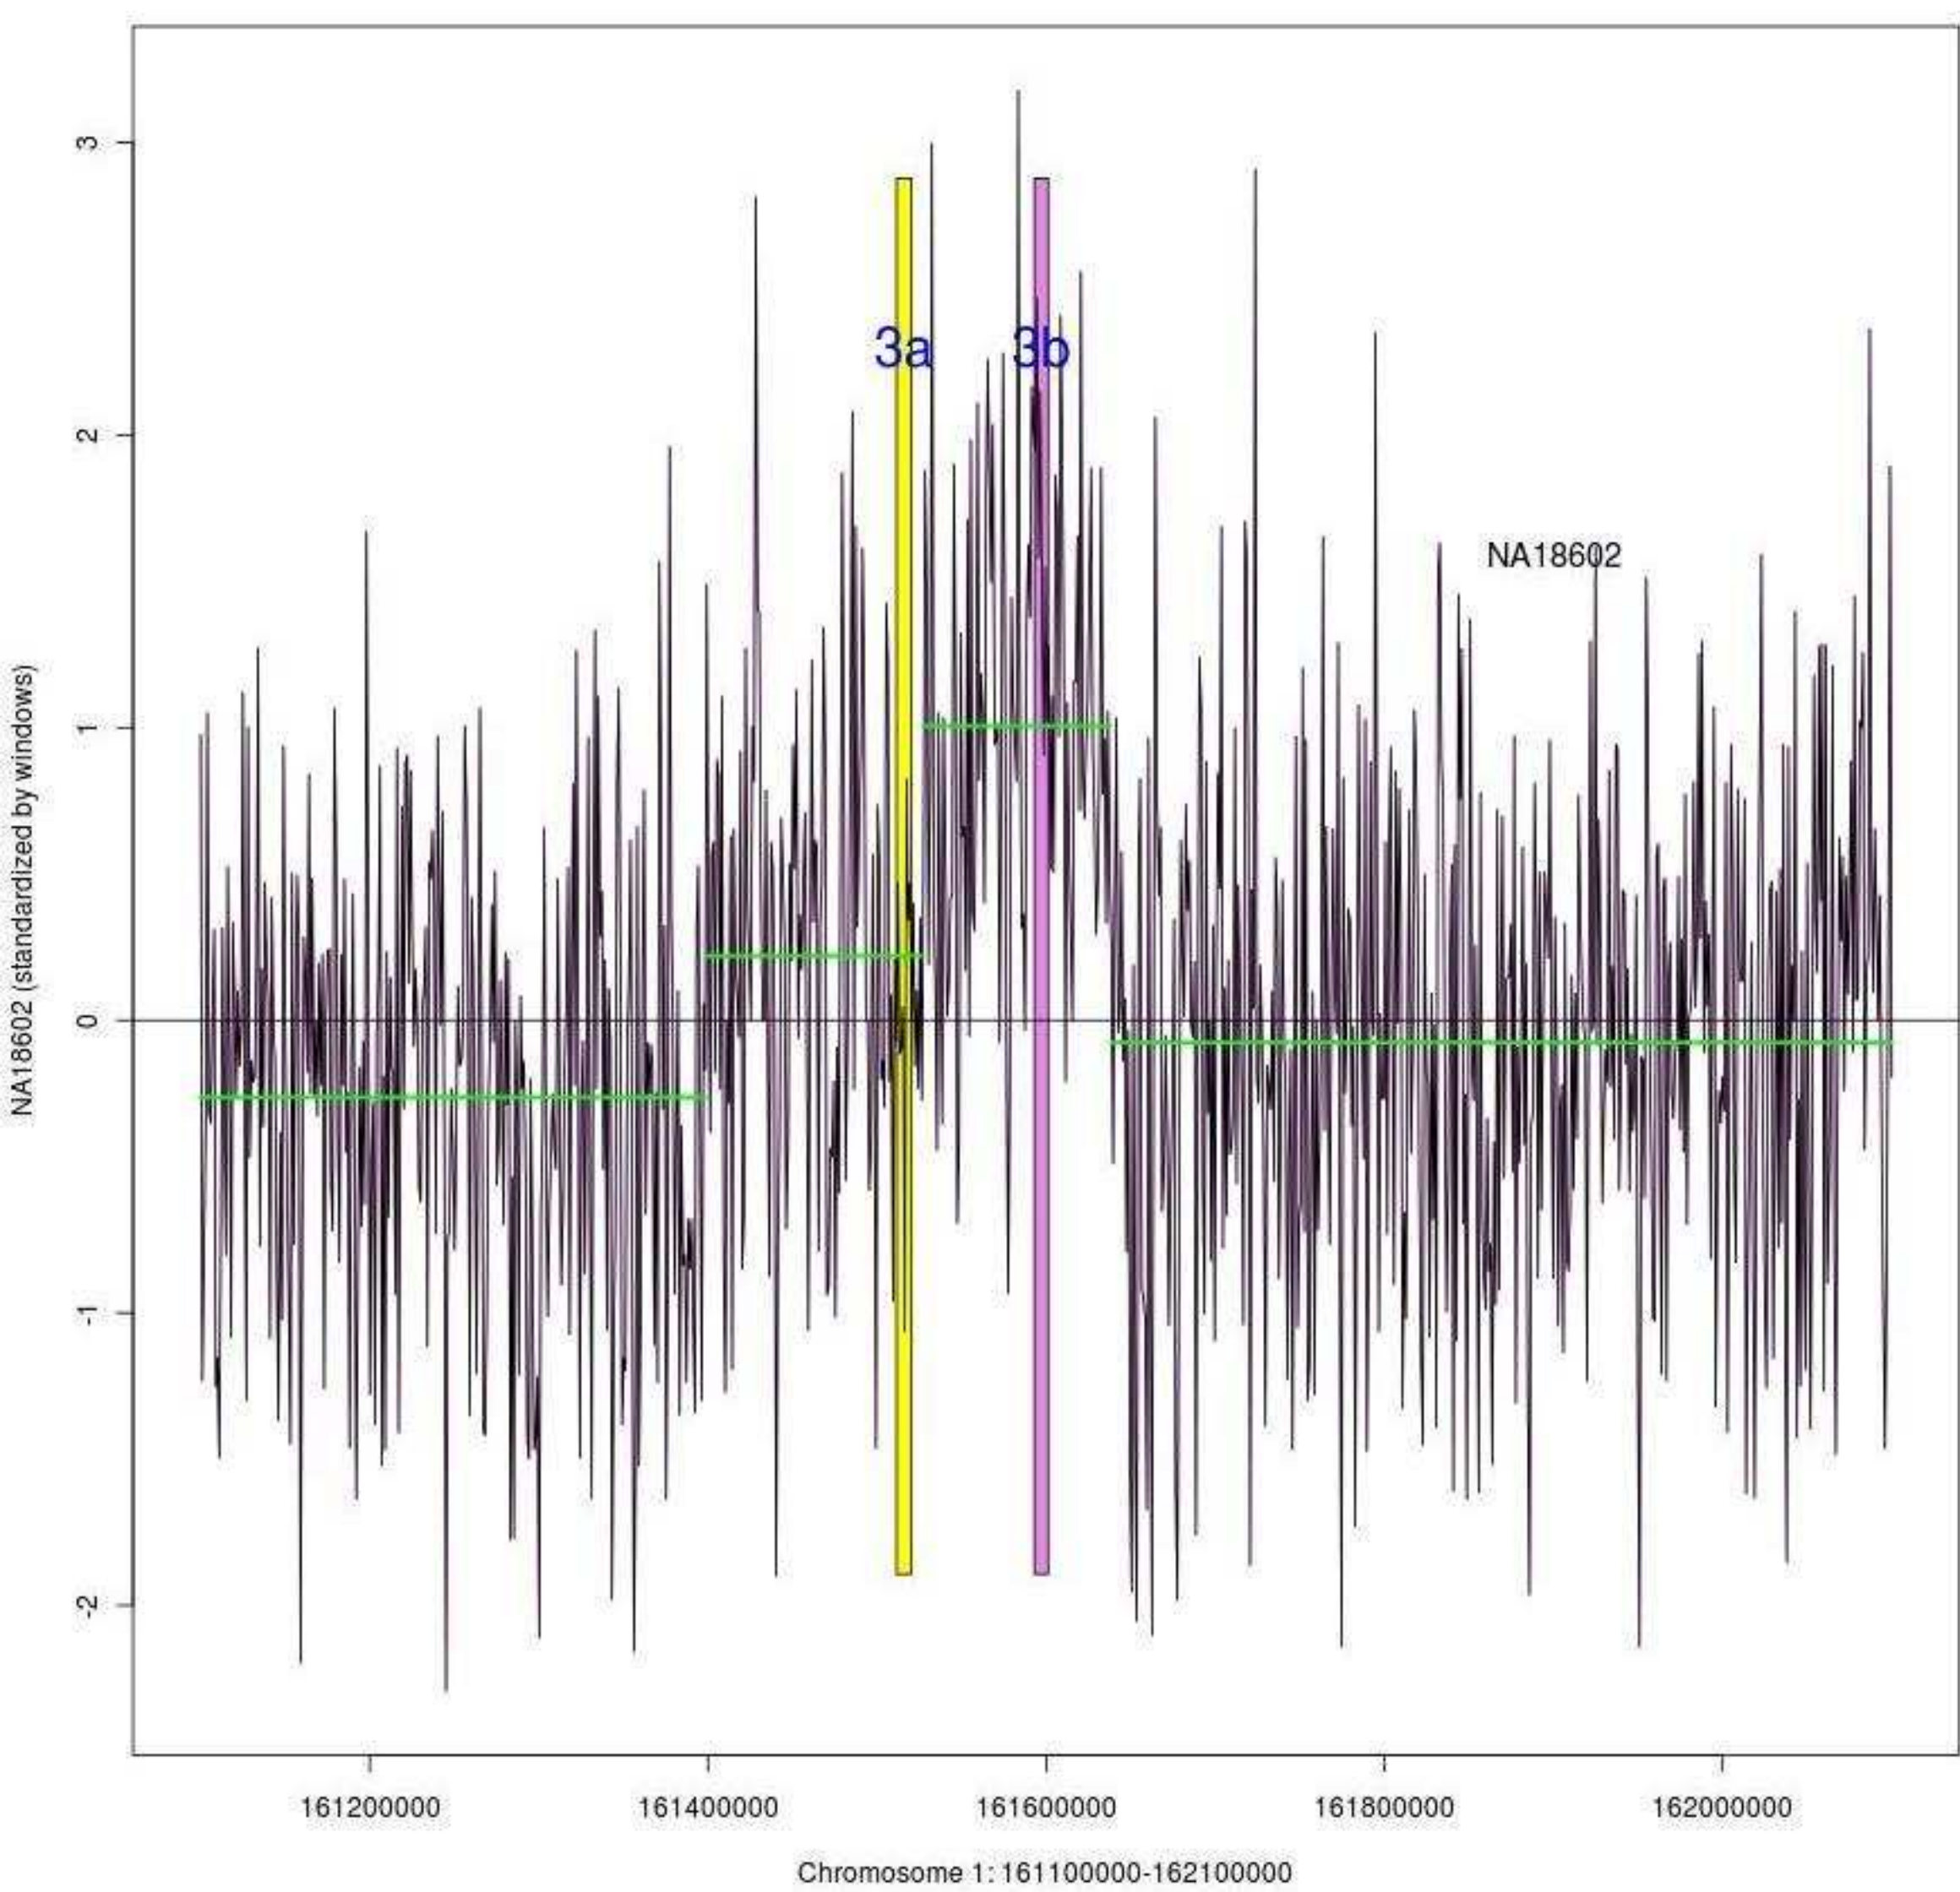

NA18618

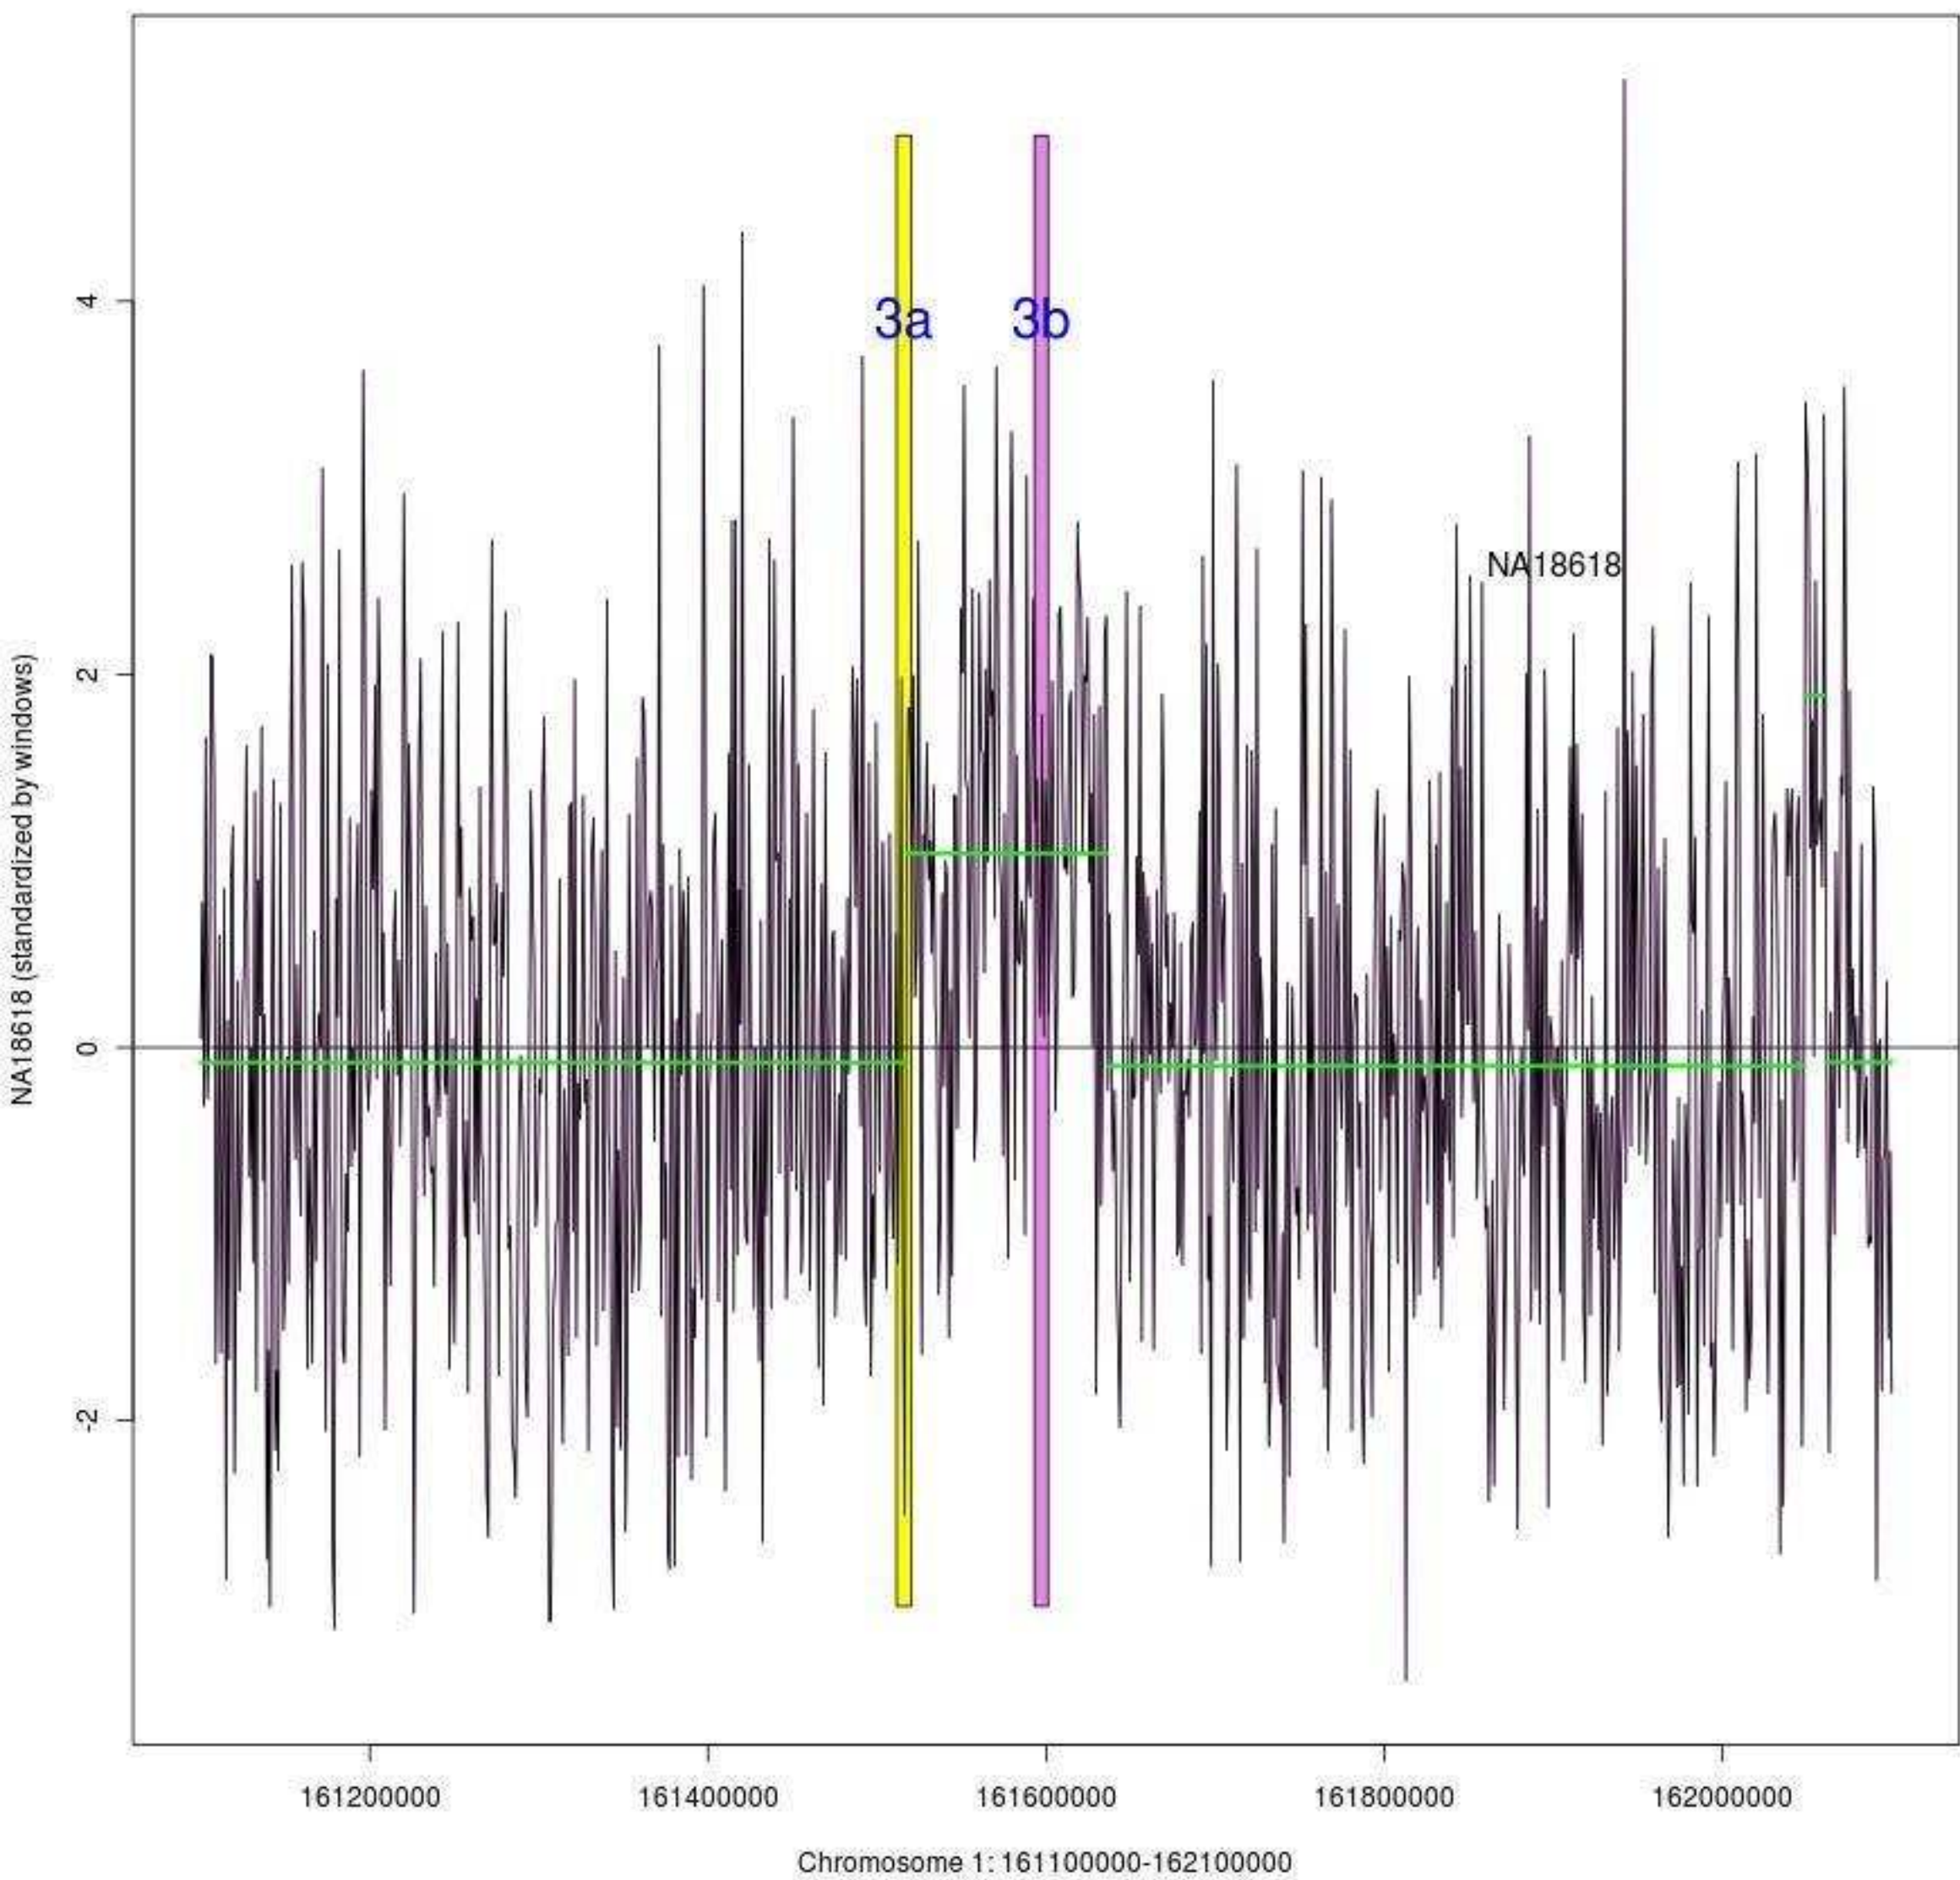



NA18634

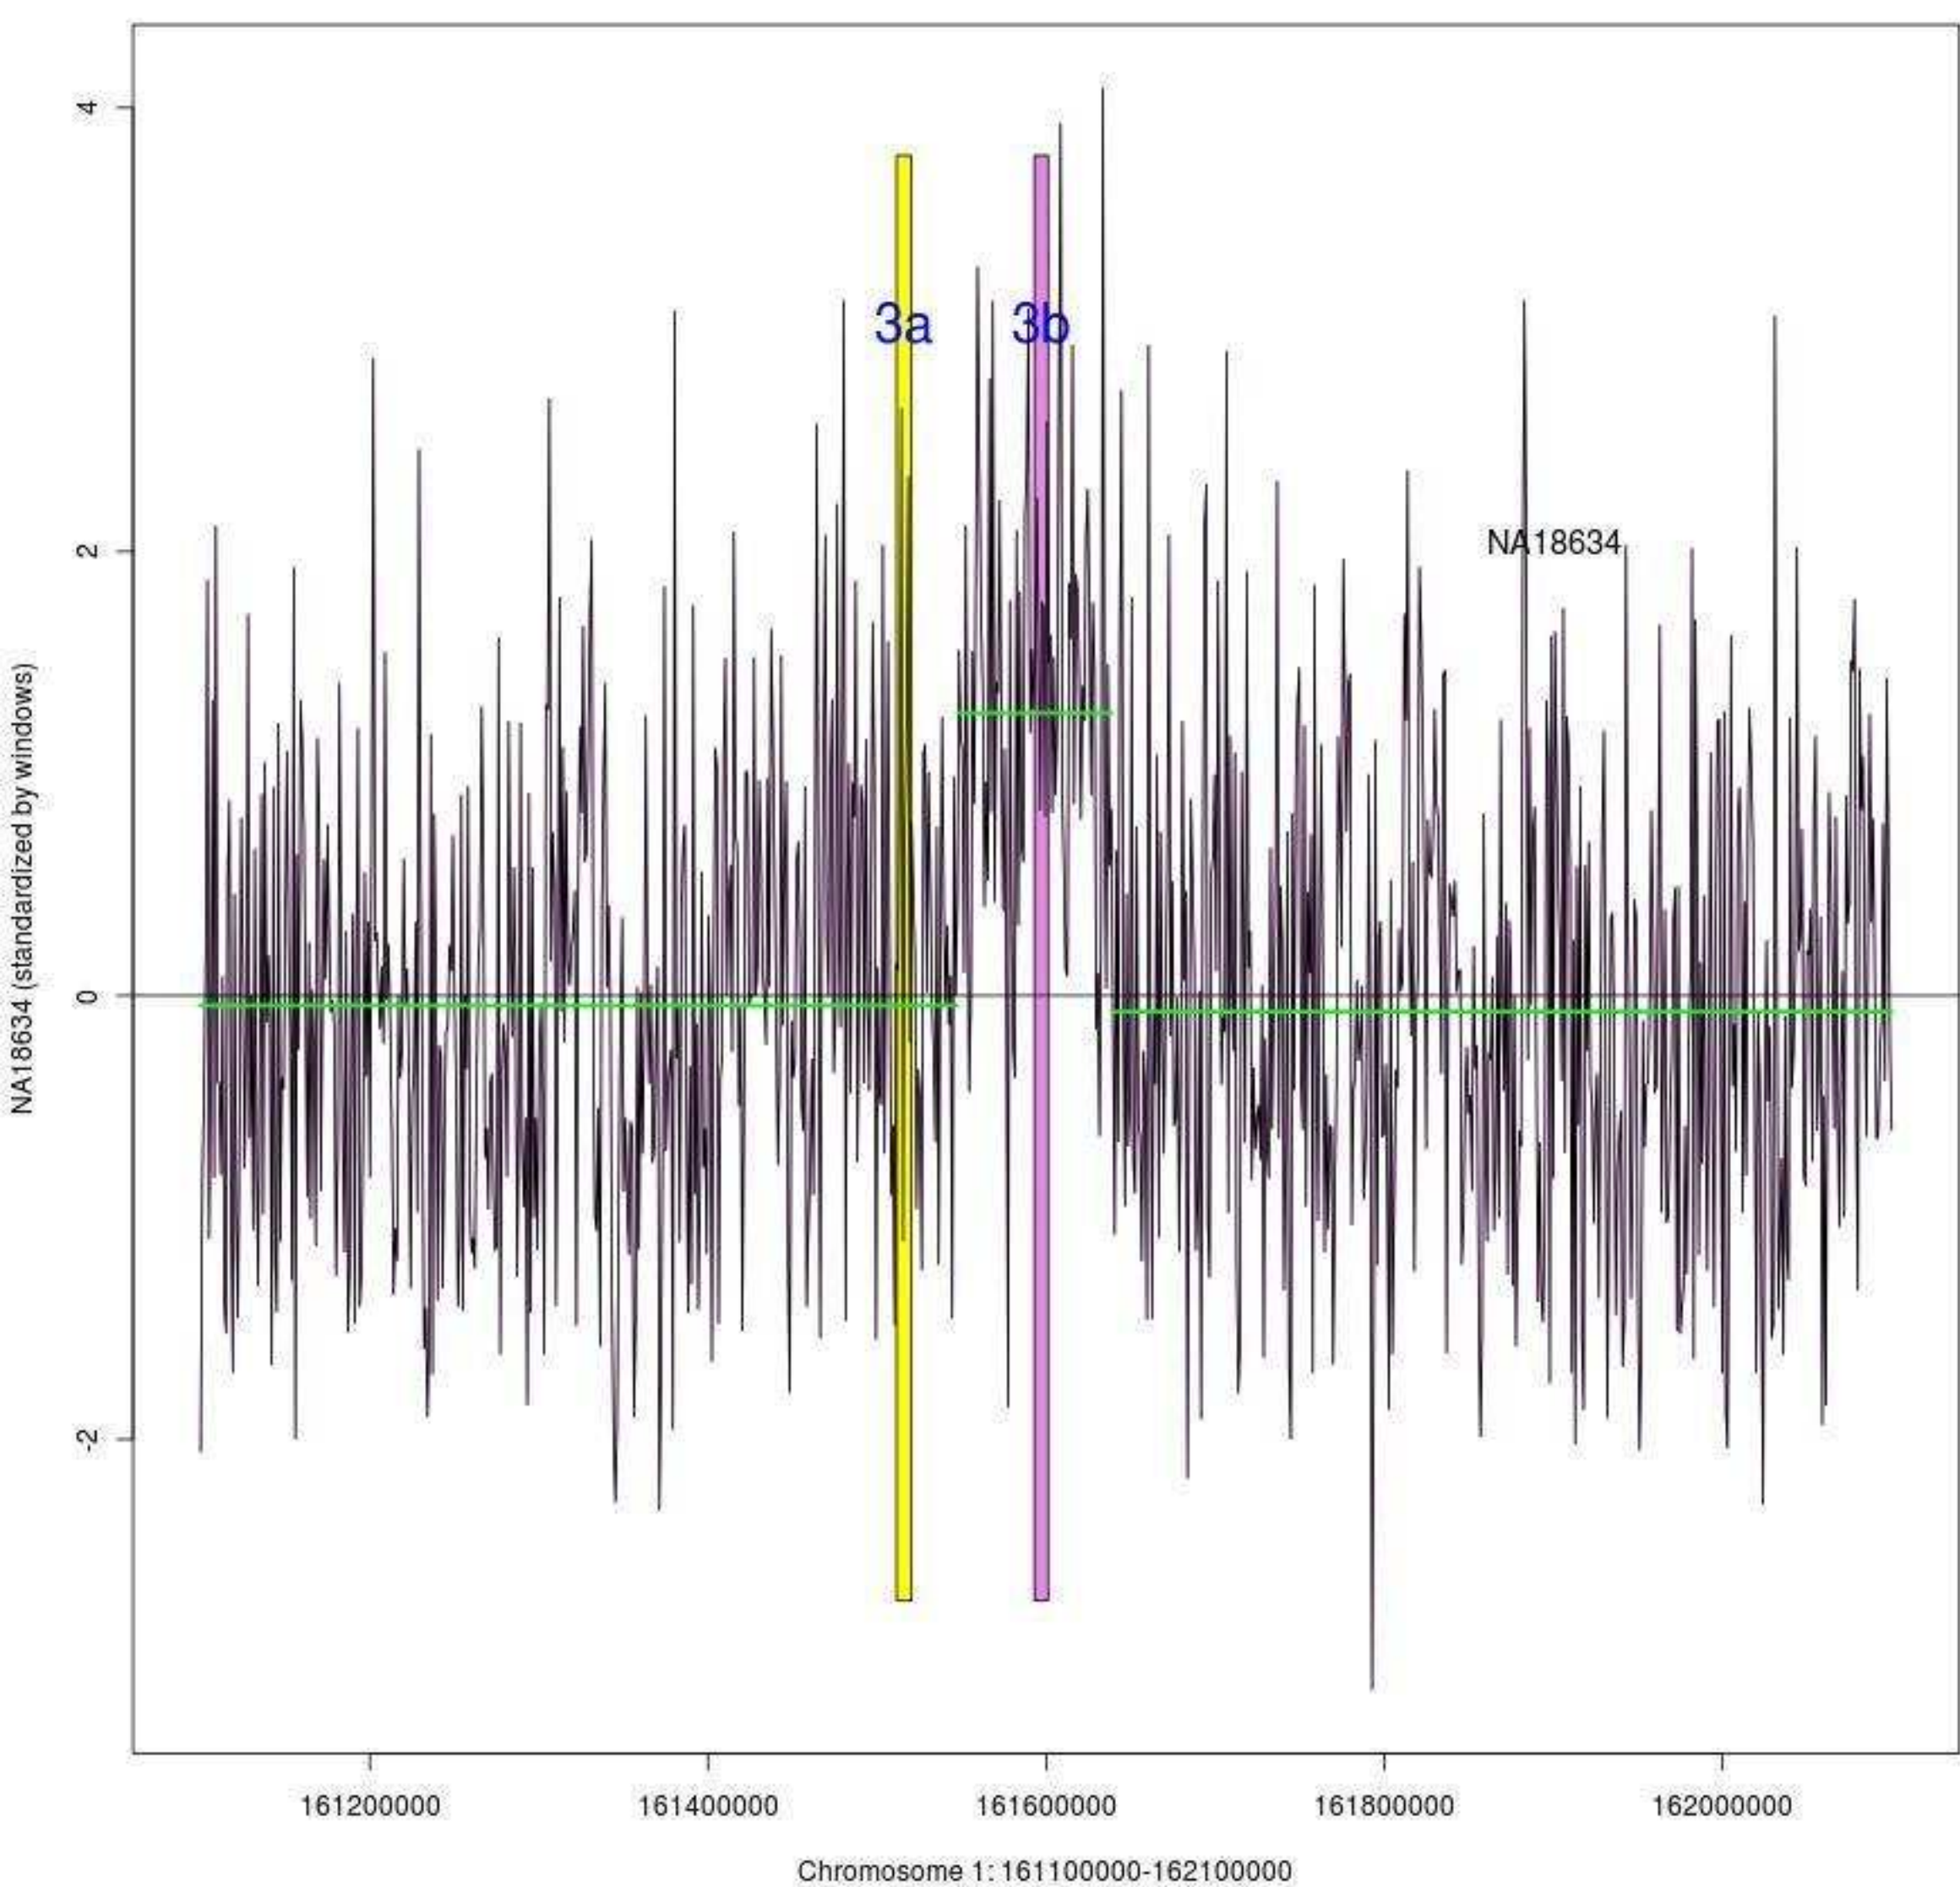

NA18952

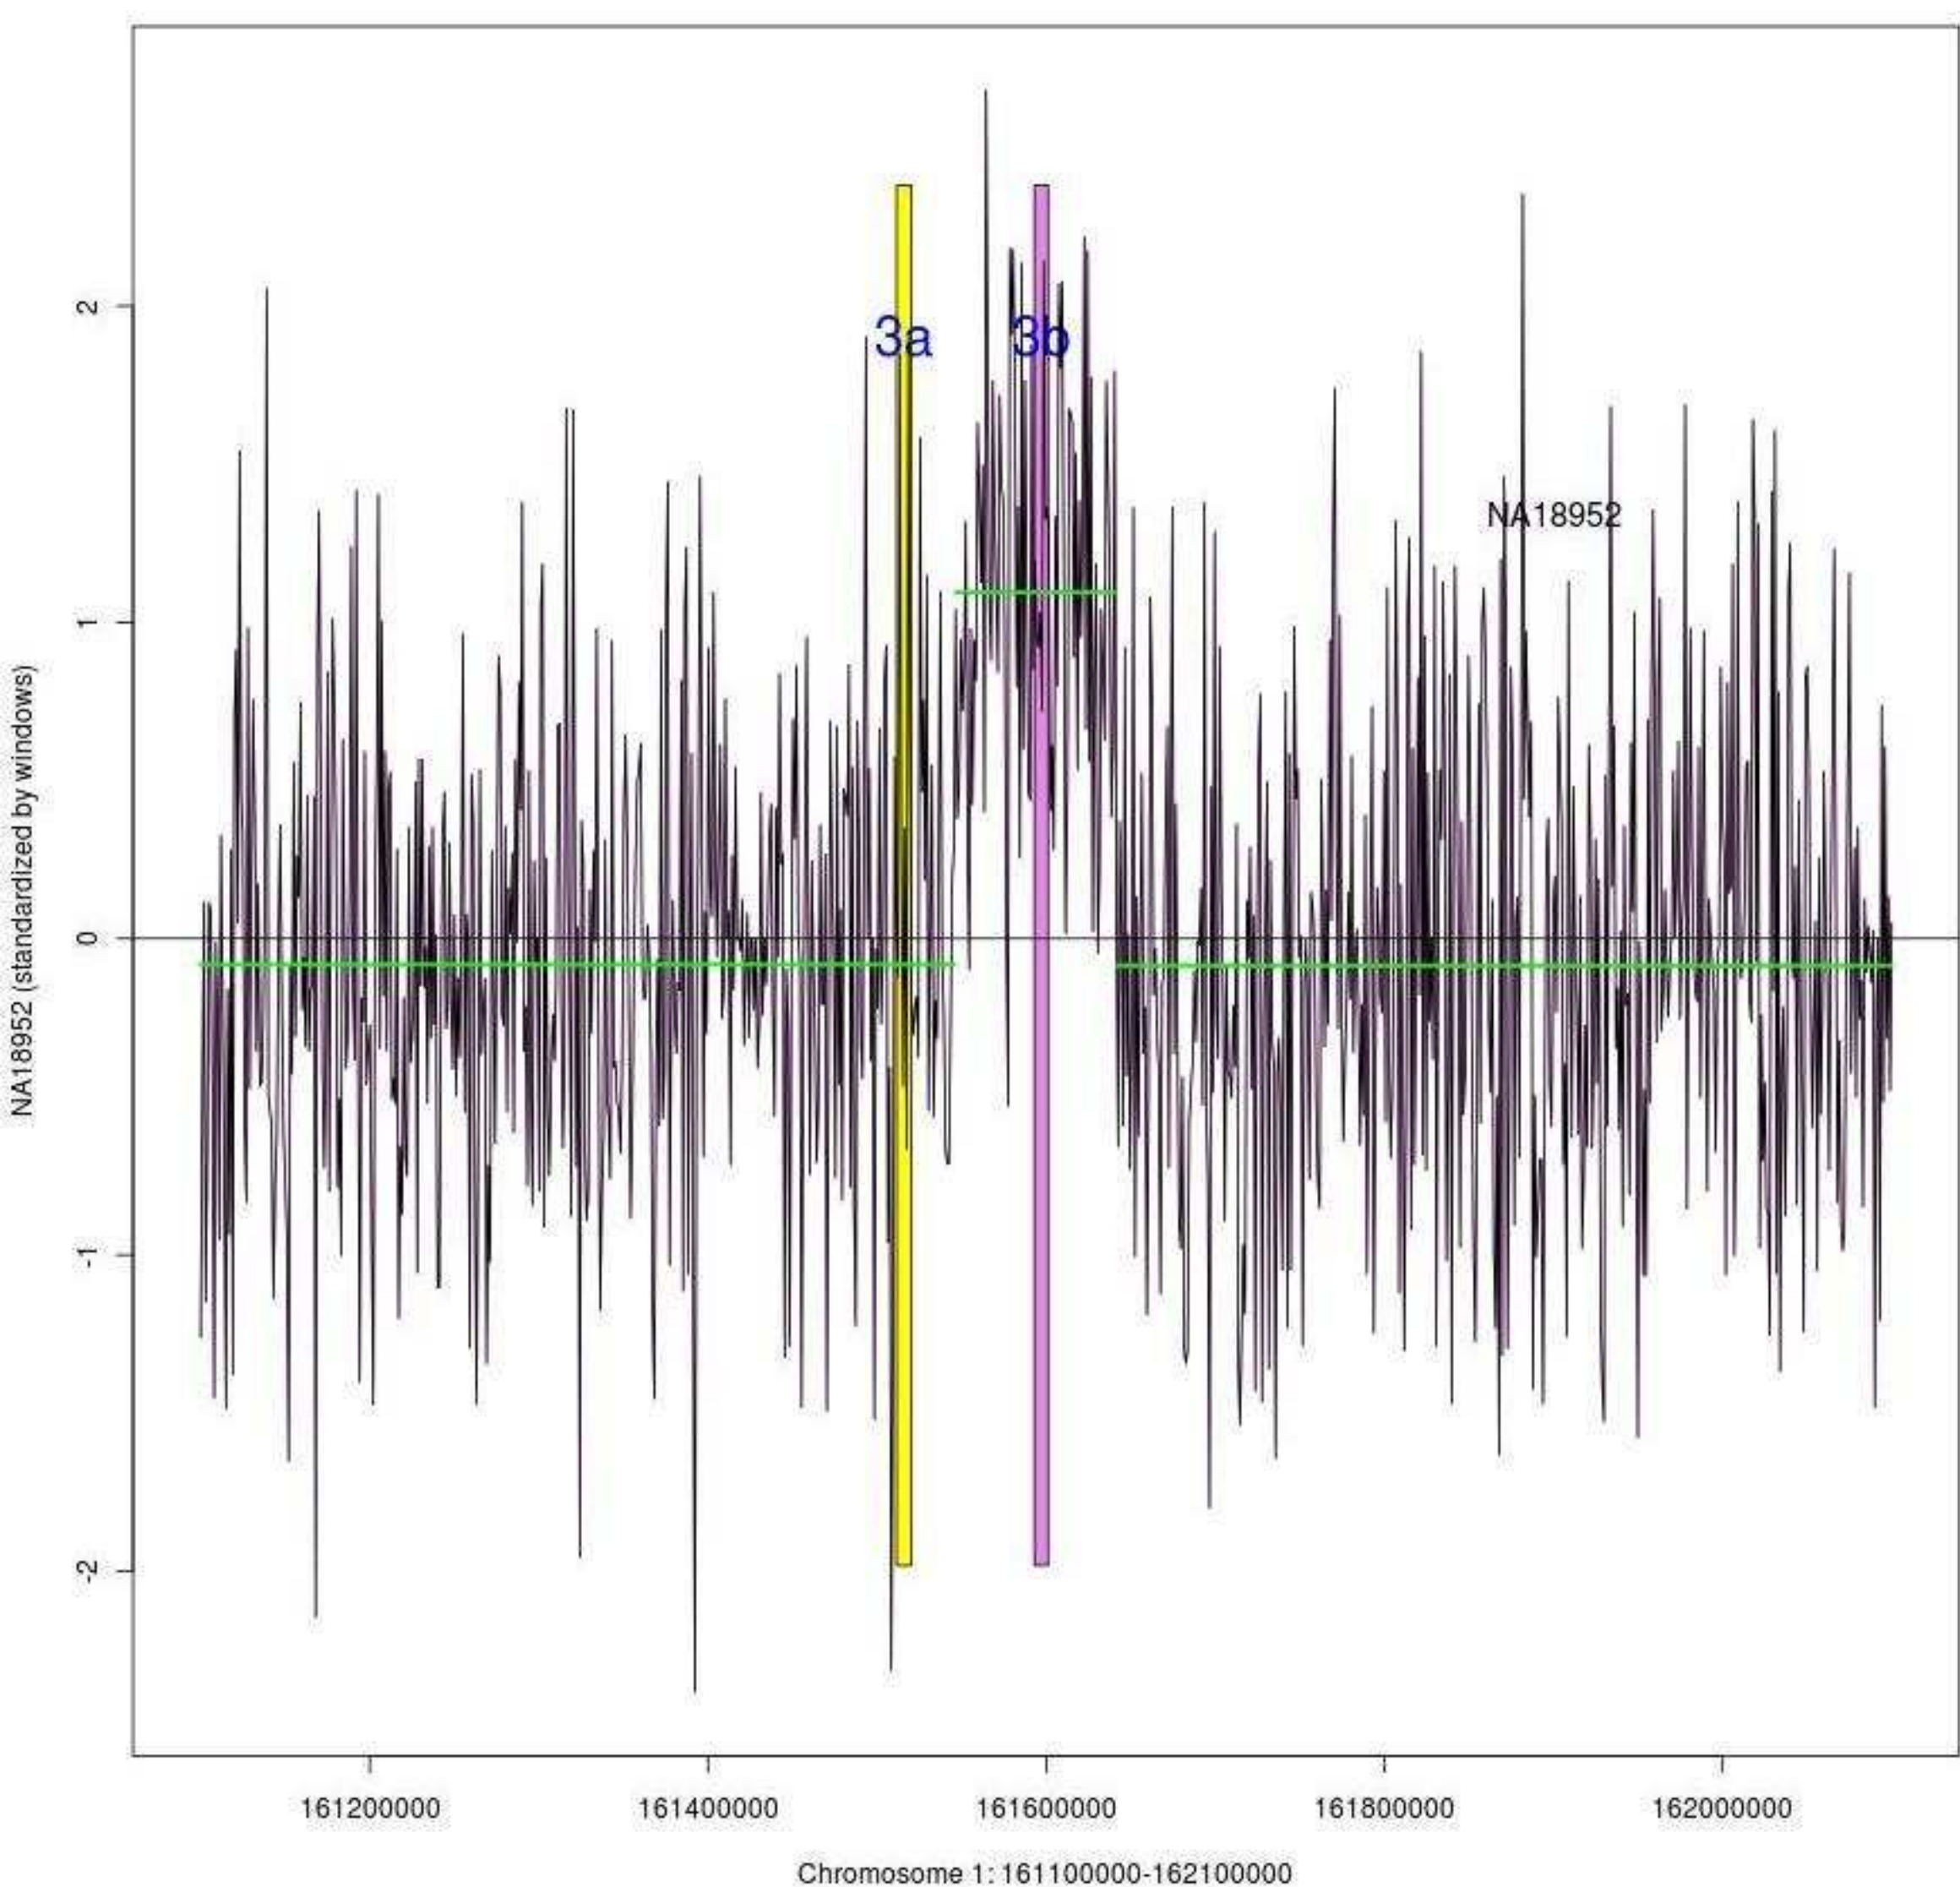

NA18956

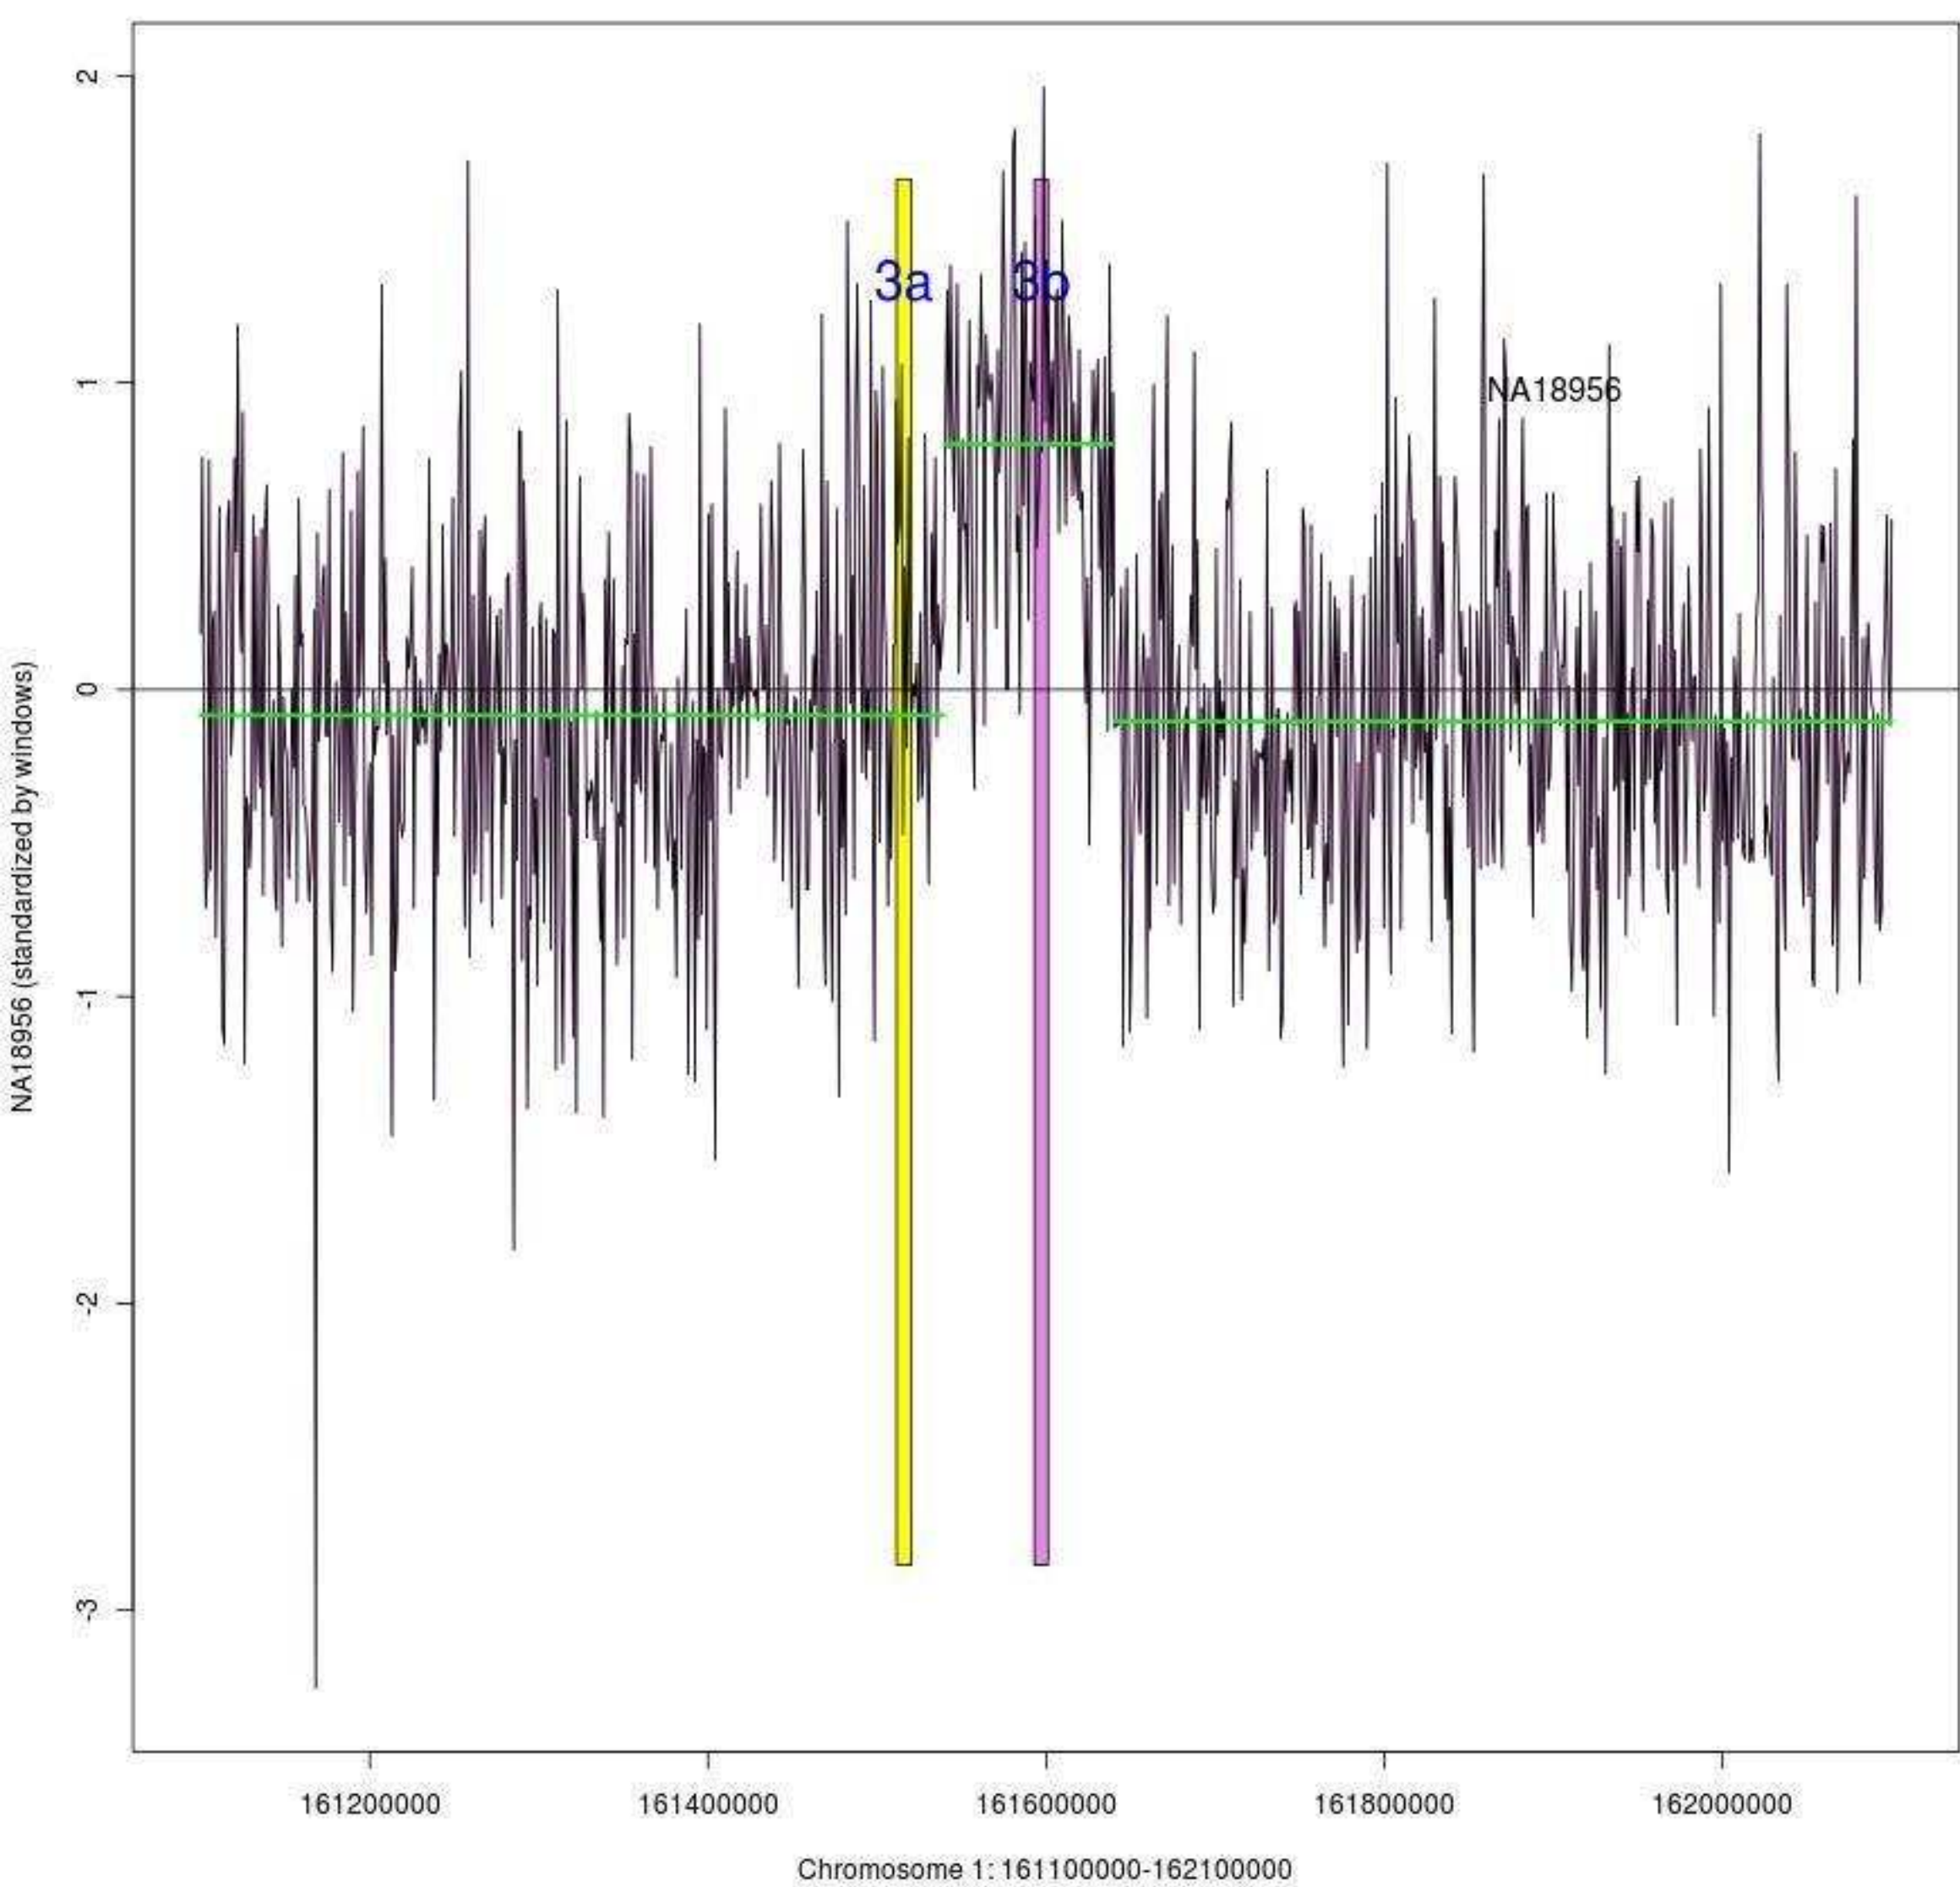



NA18977

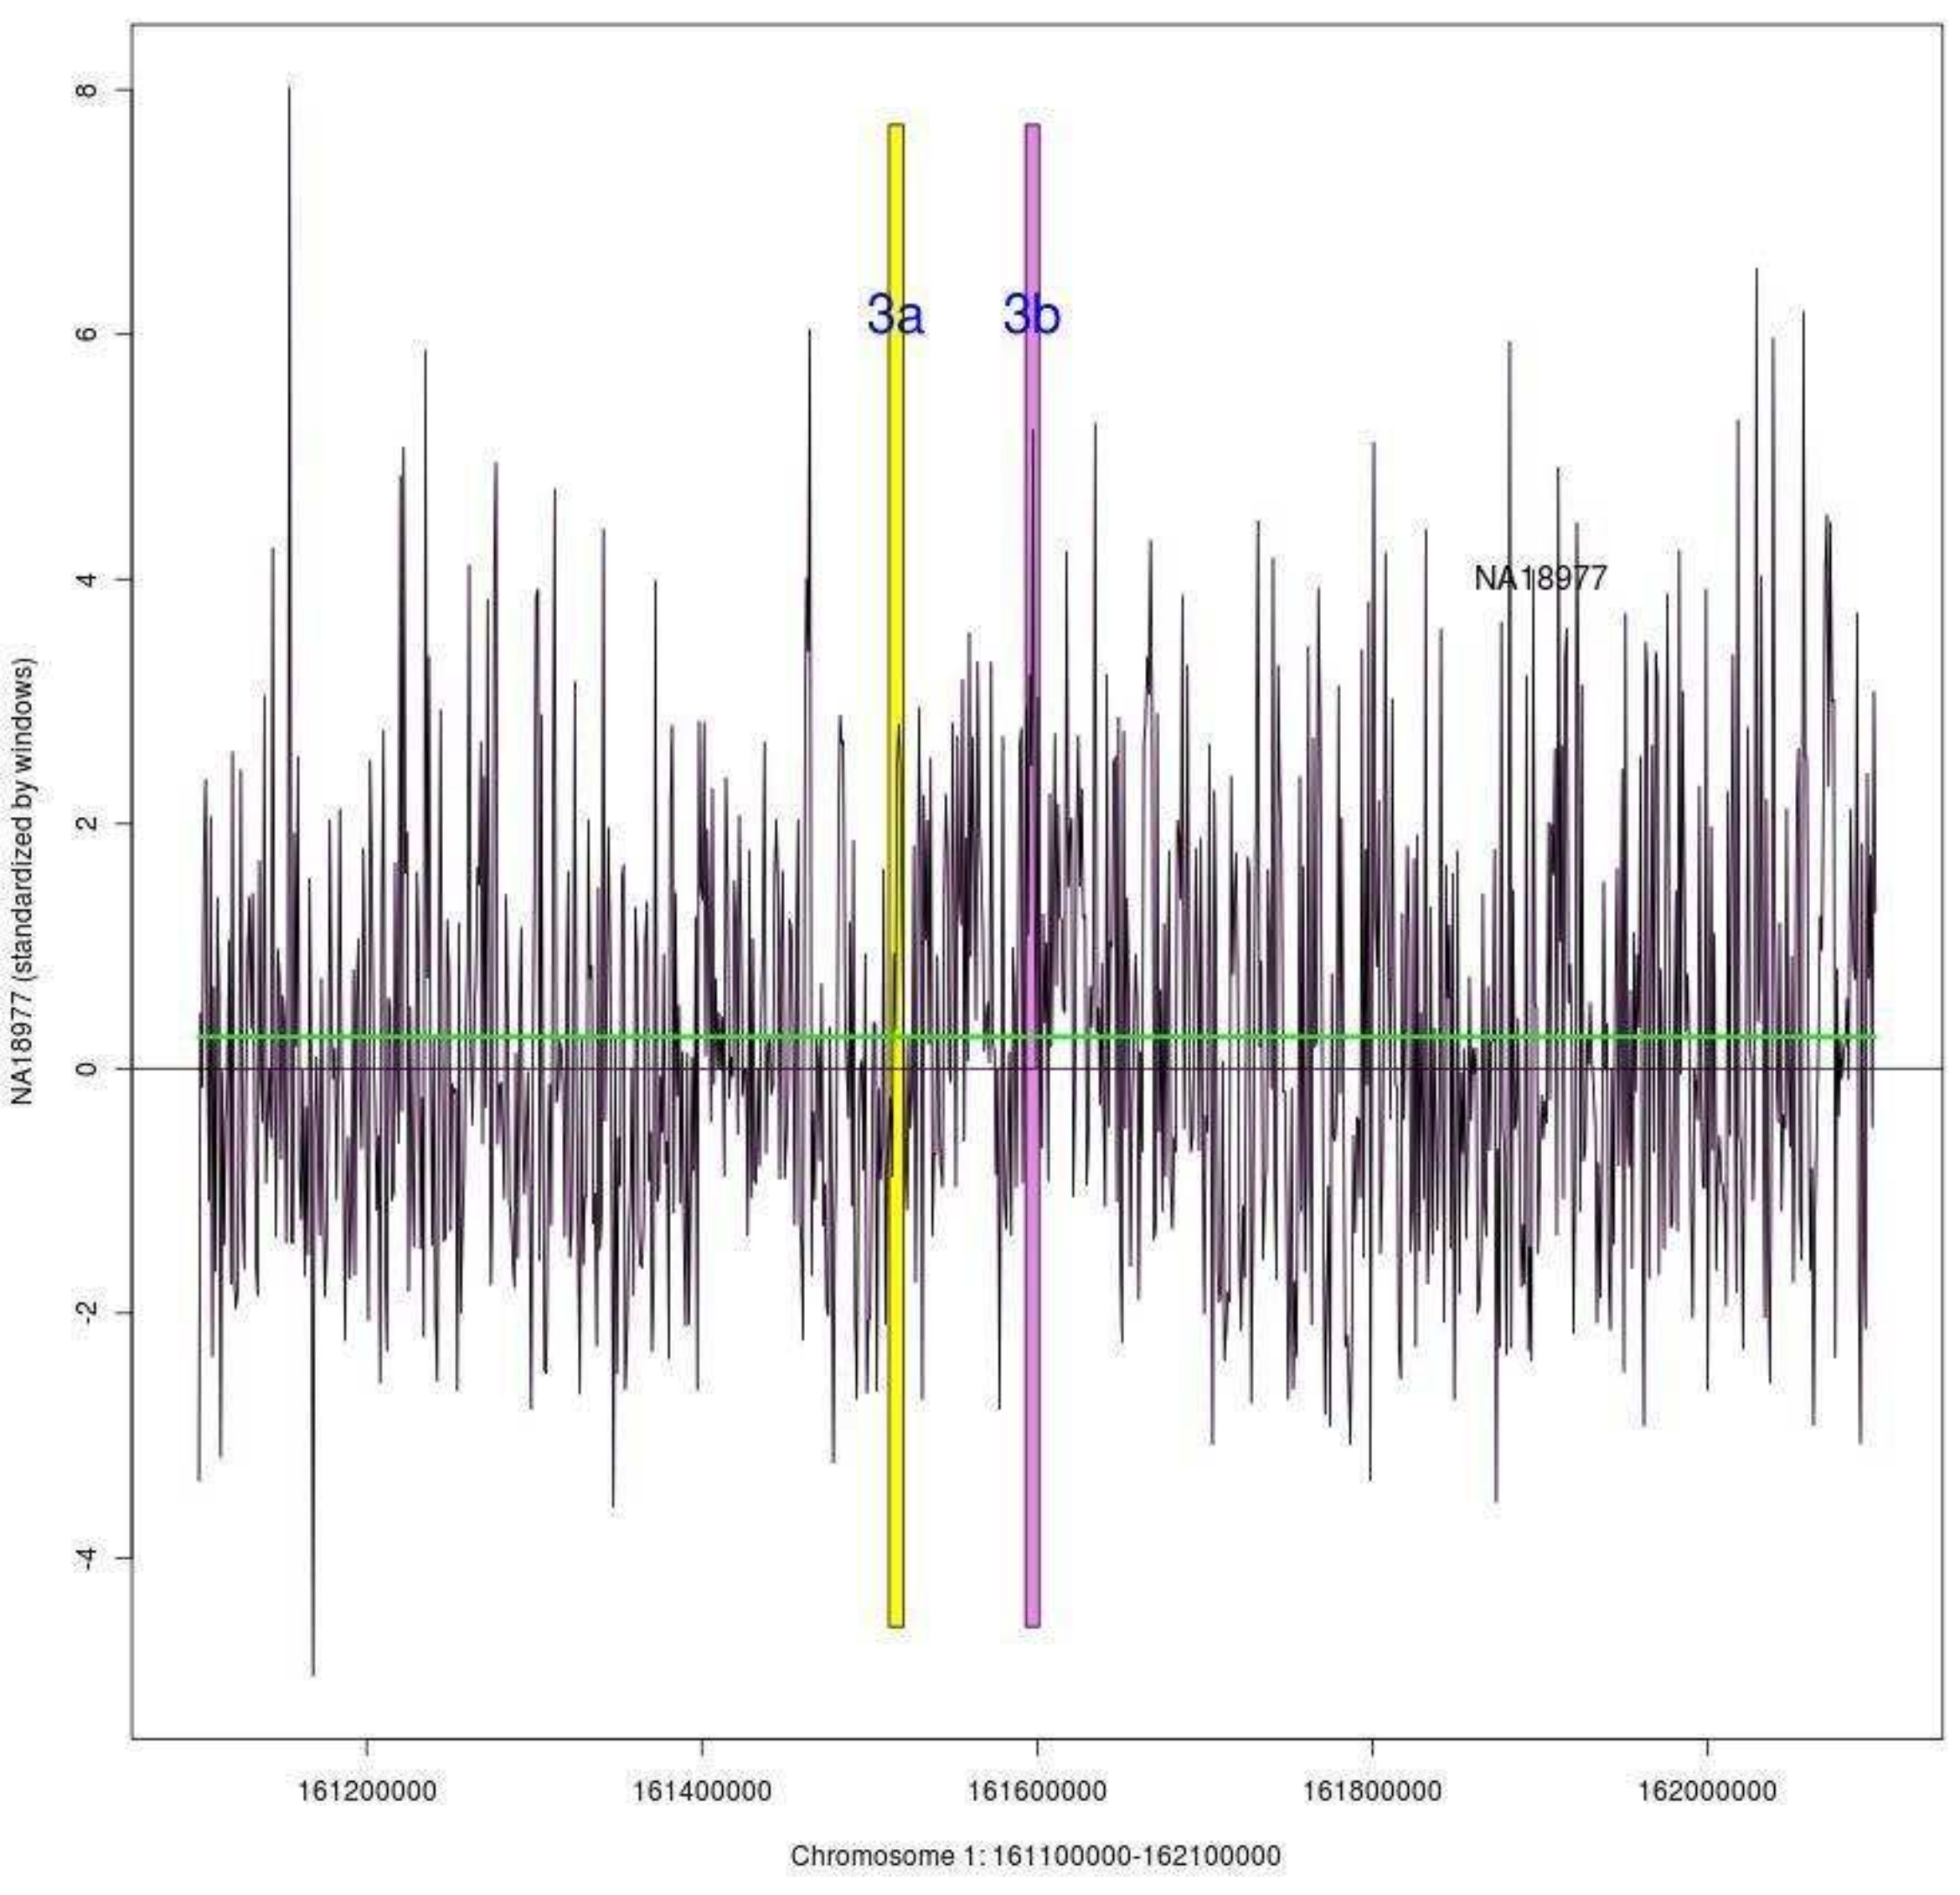

NA18999

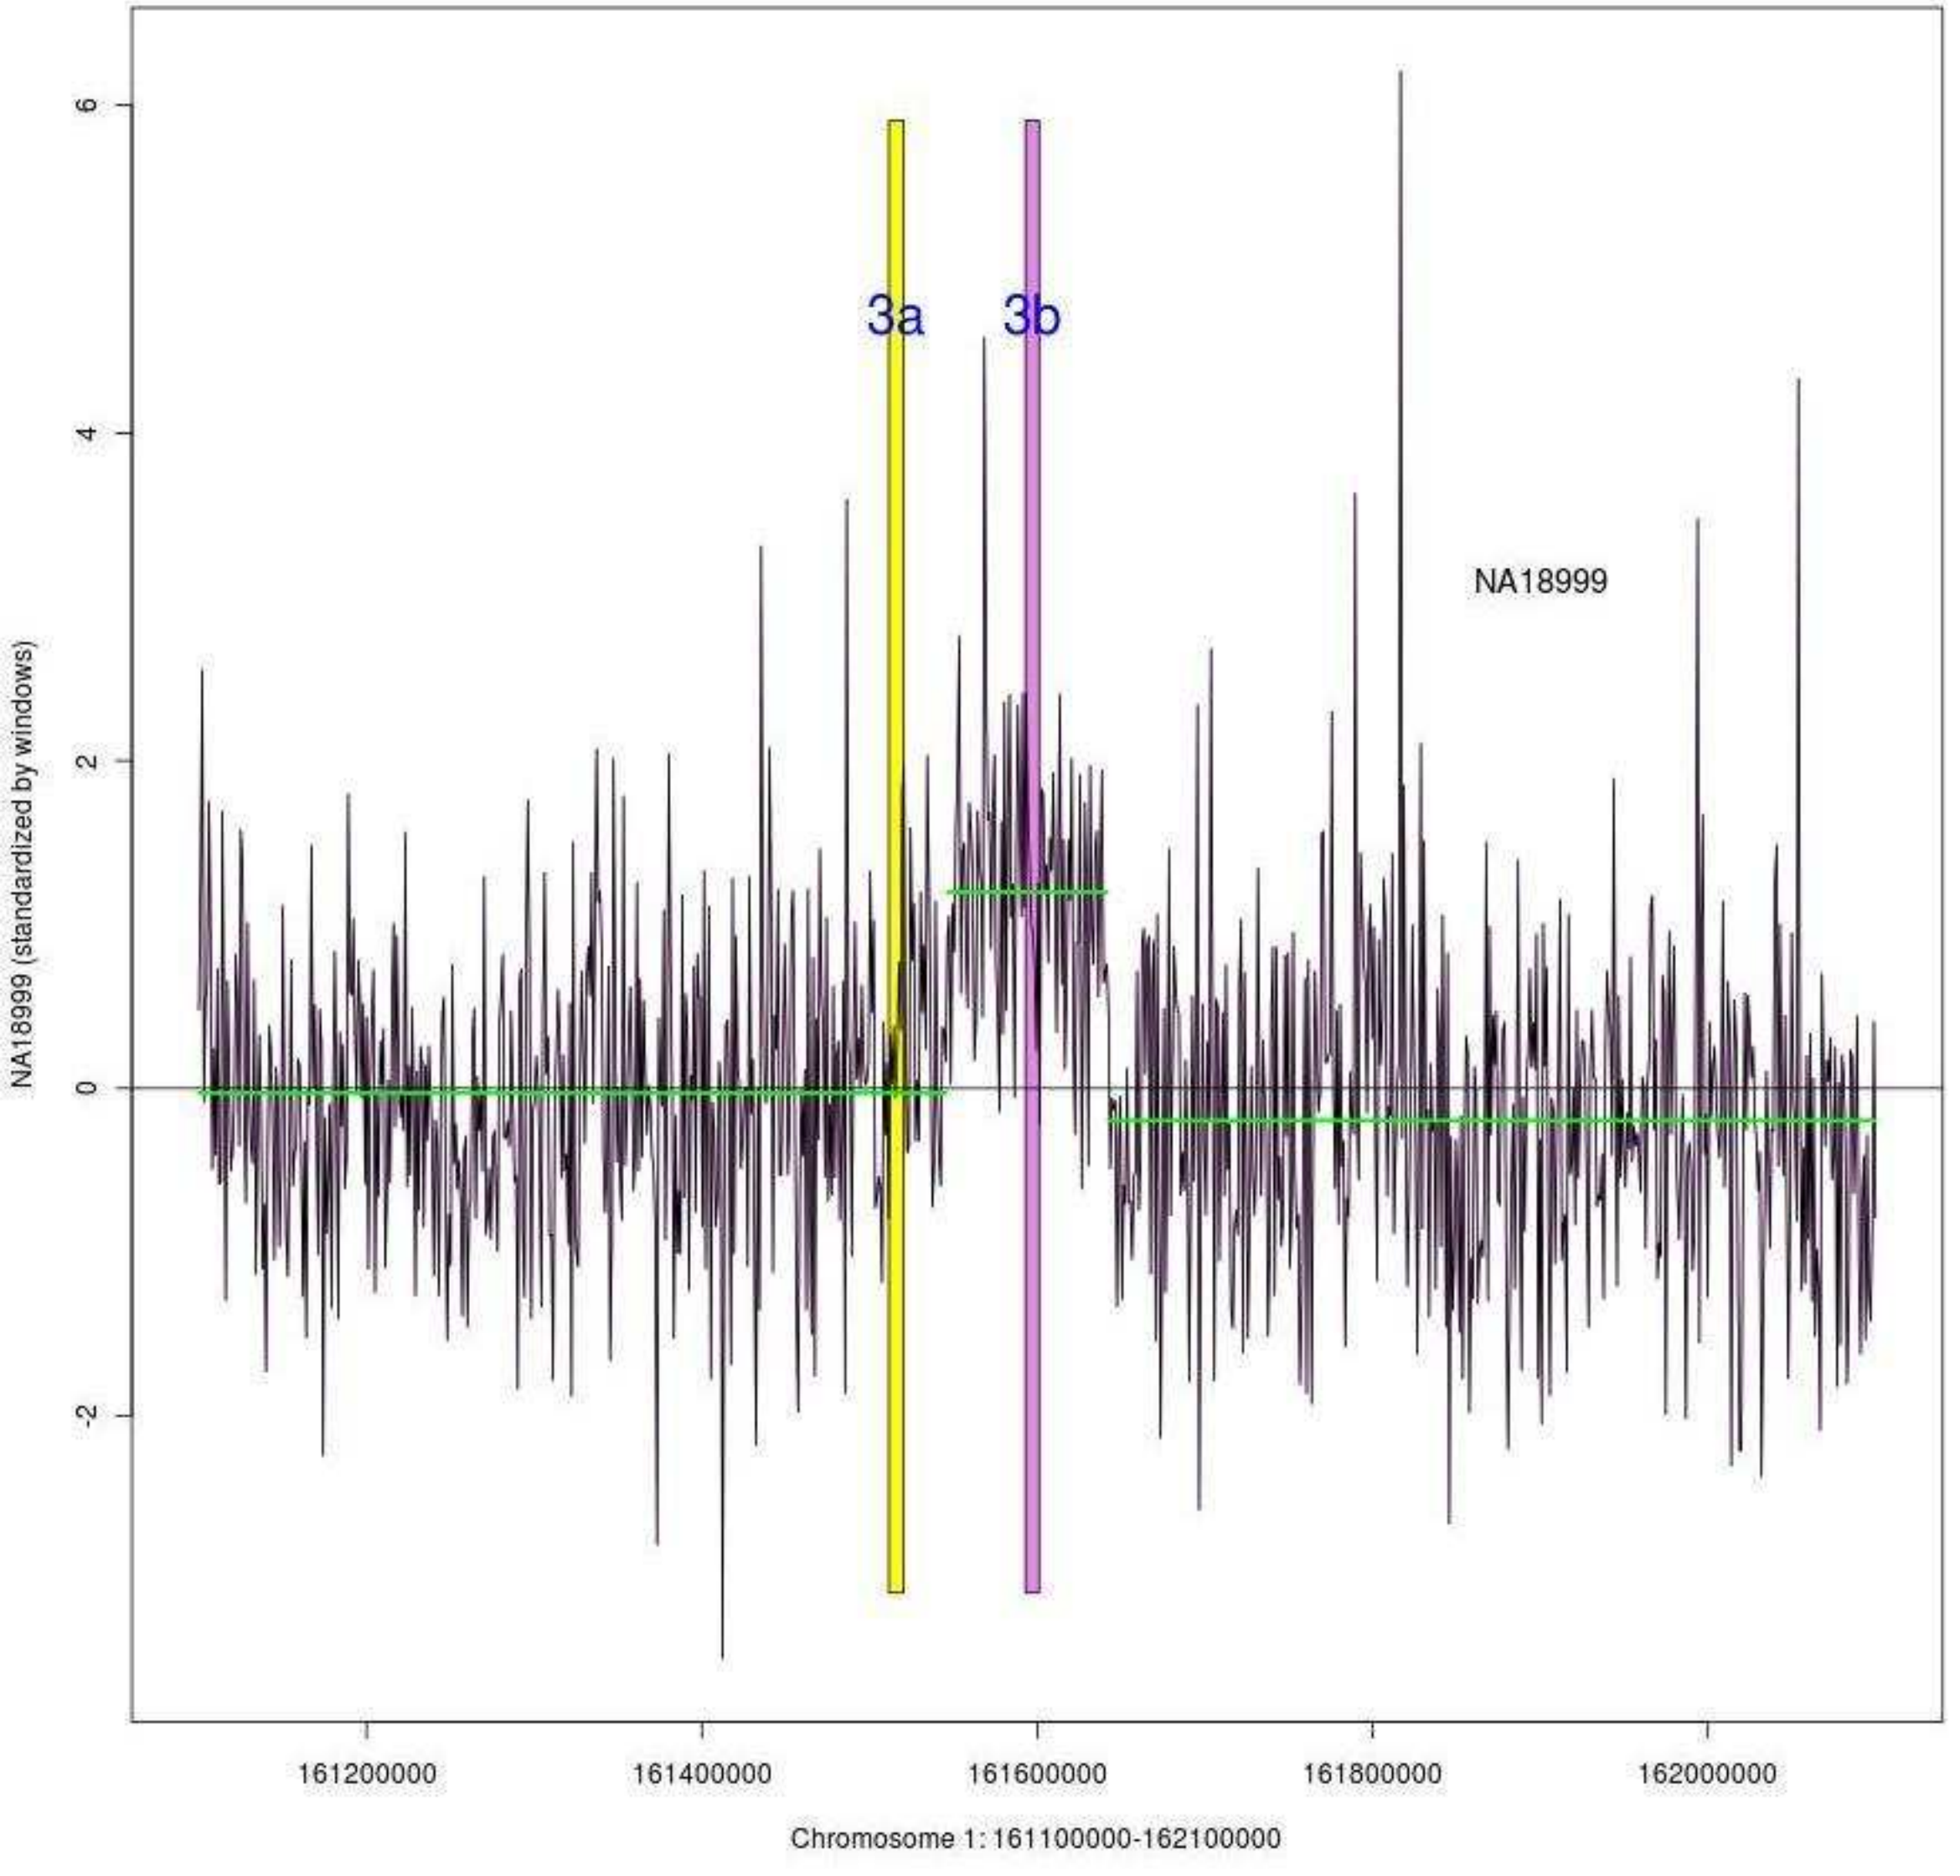

NA19651

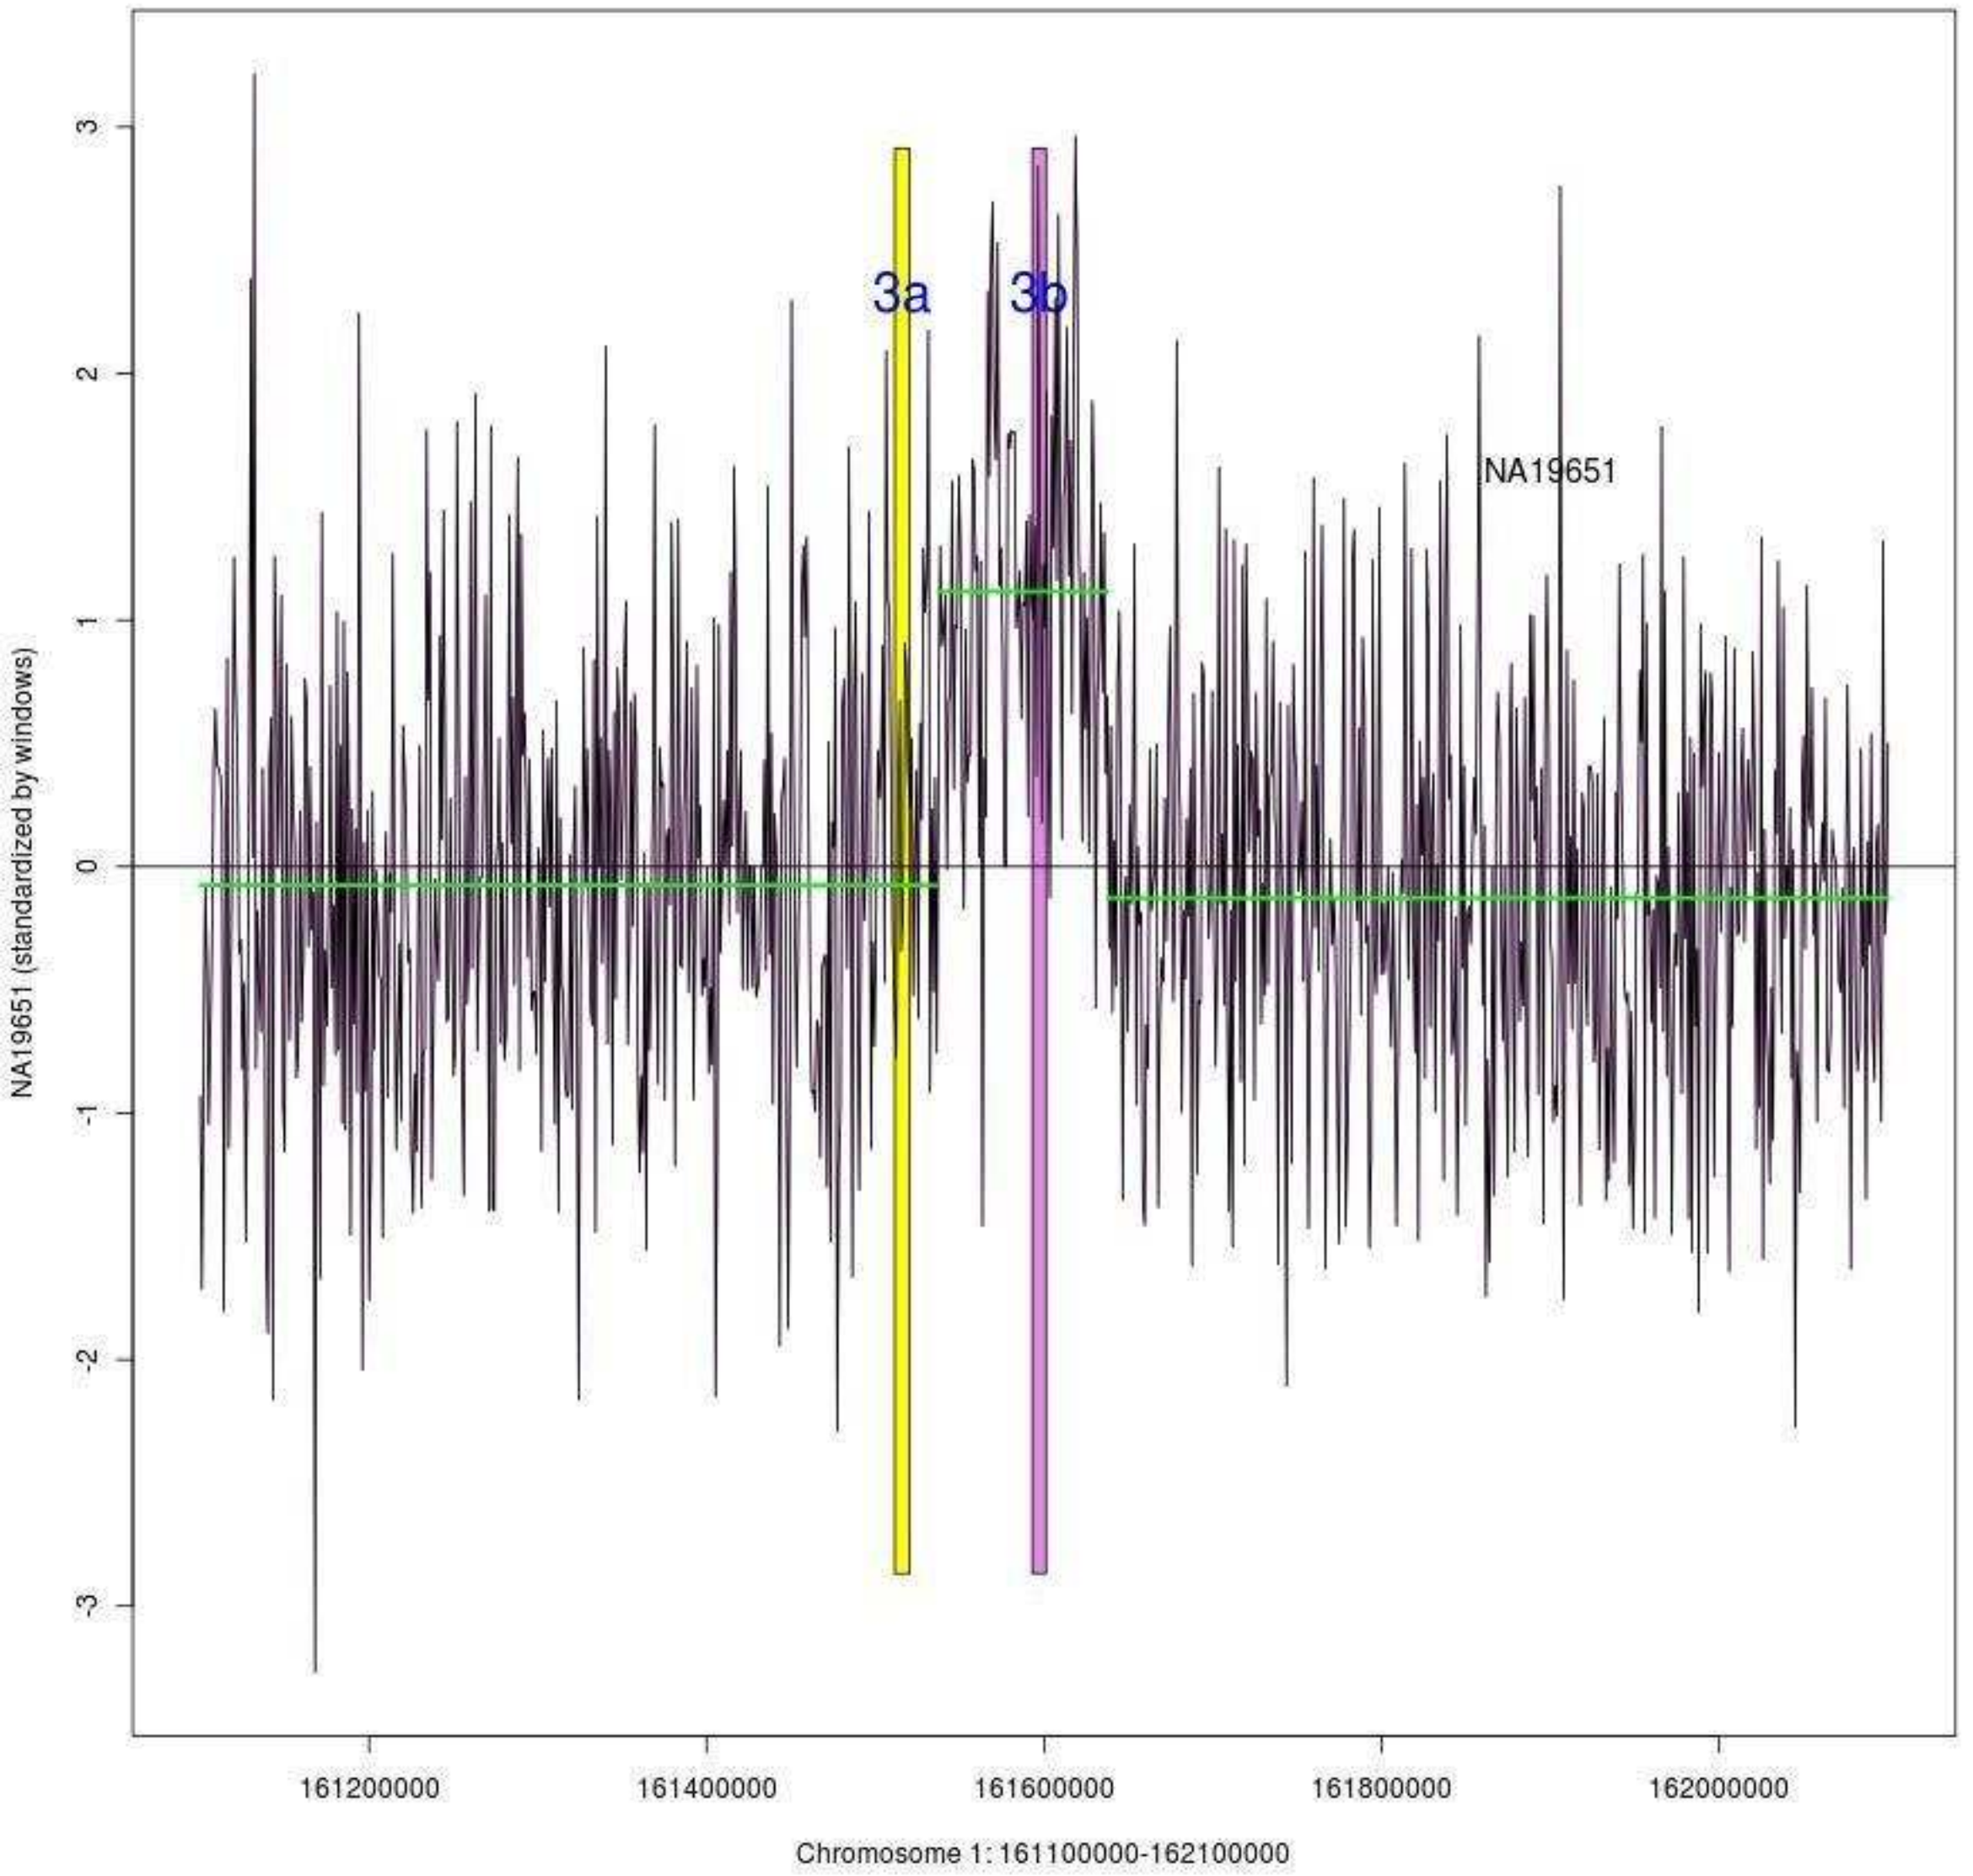



NA19717

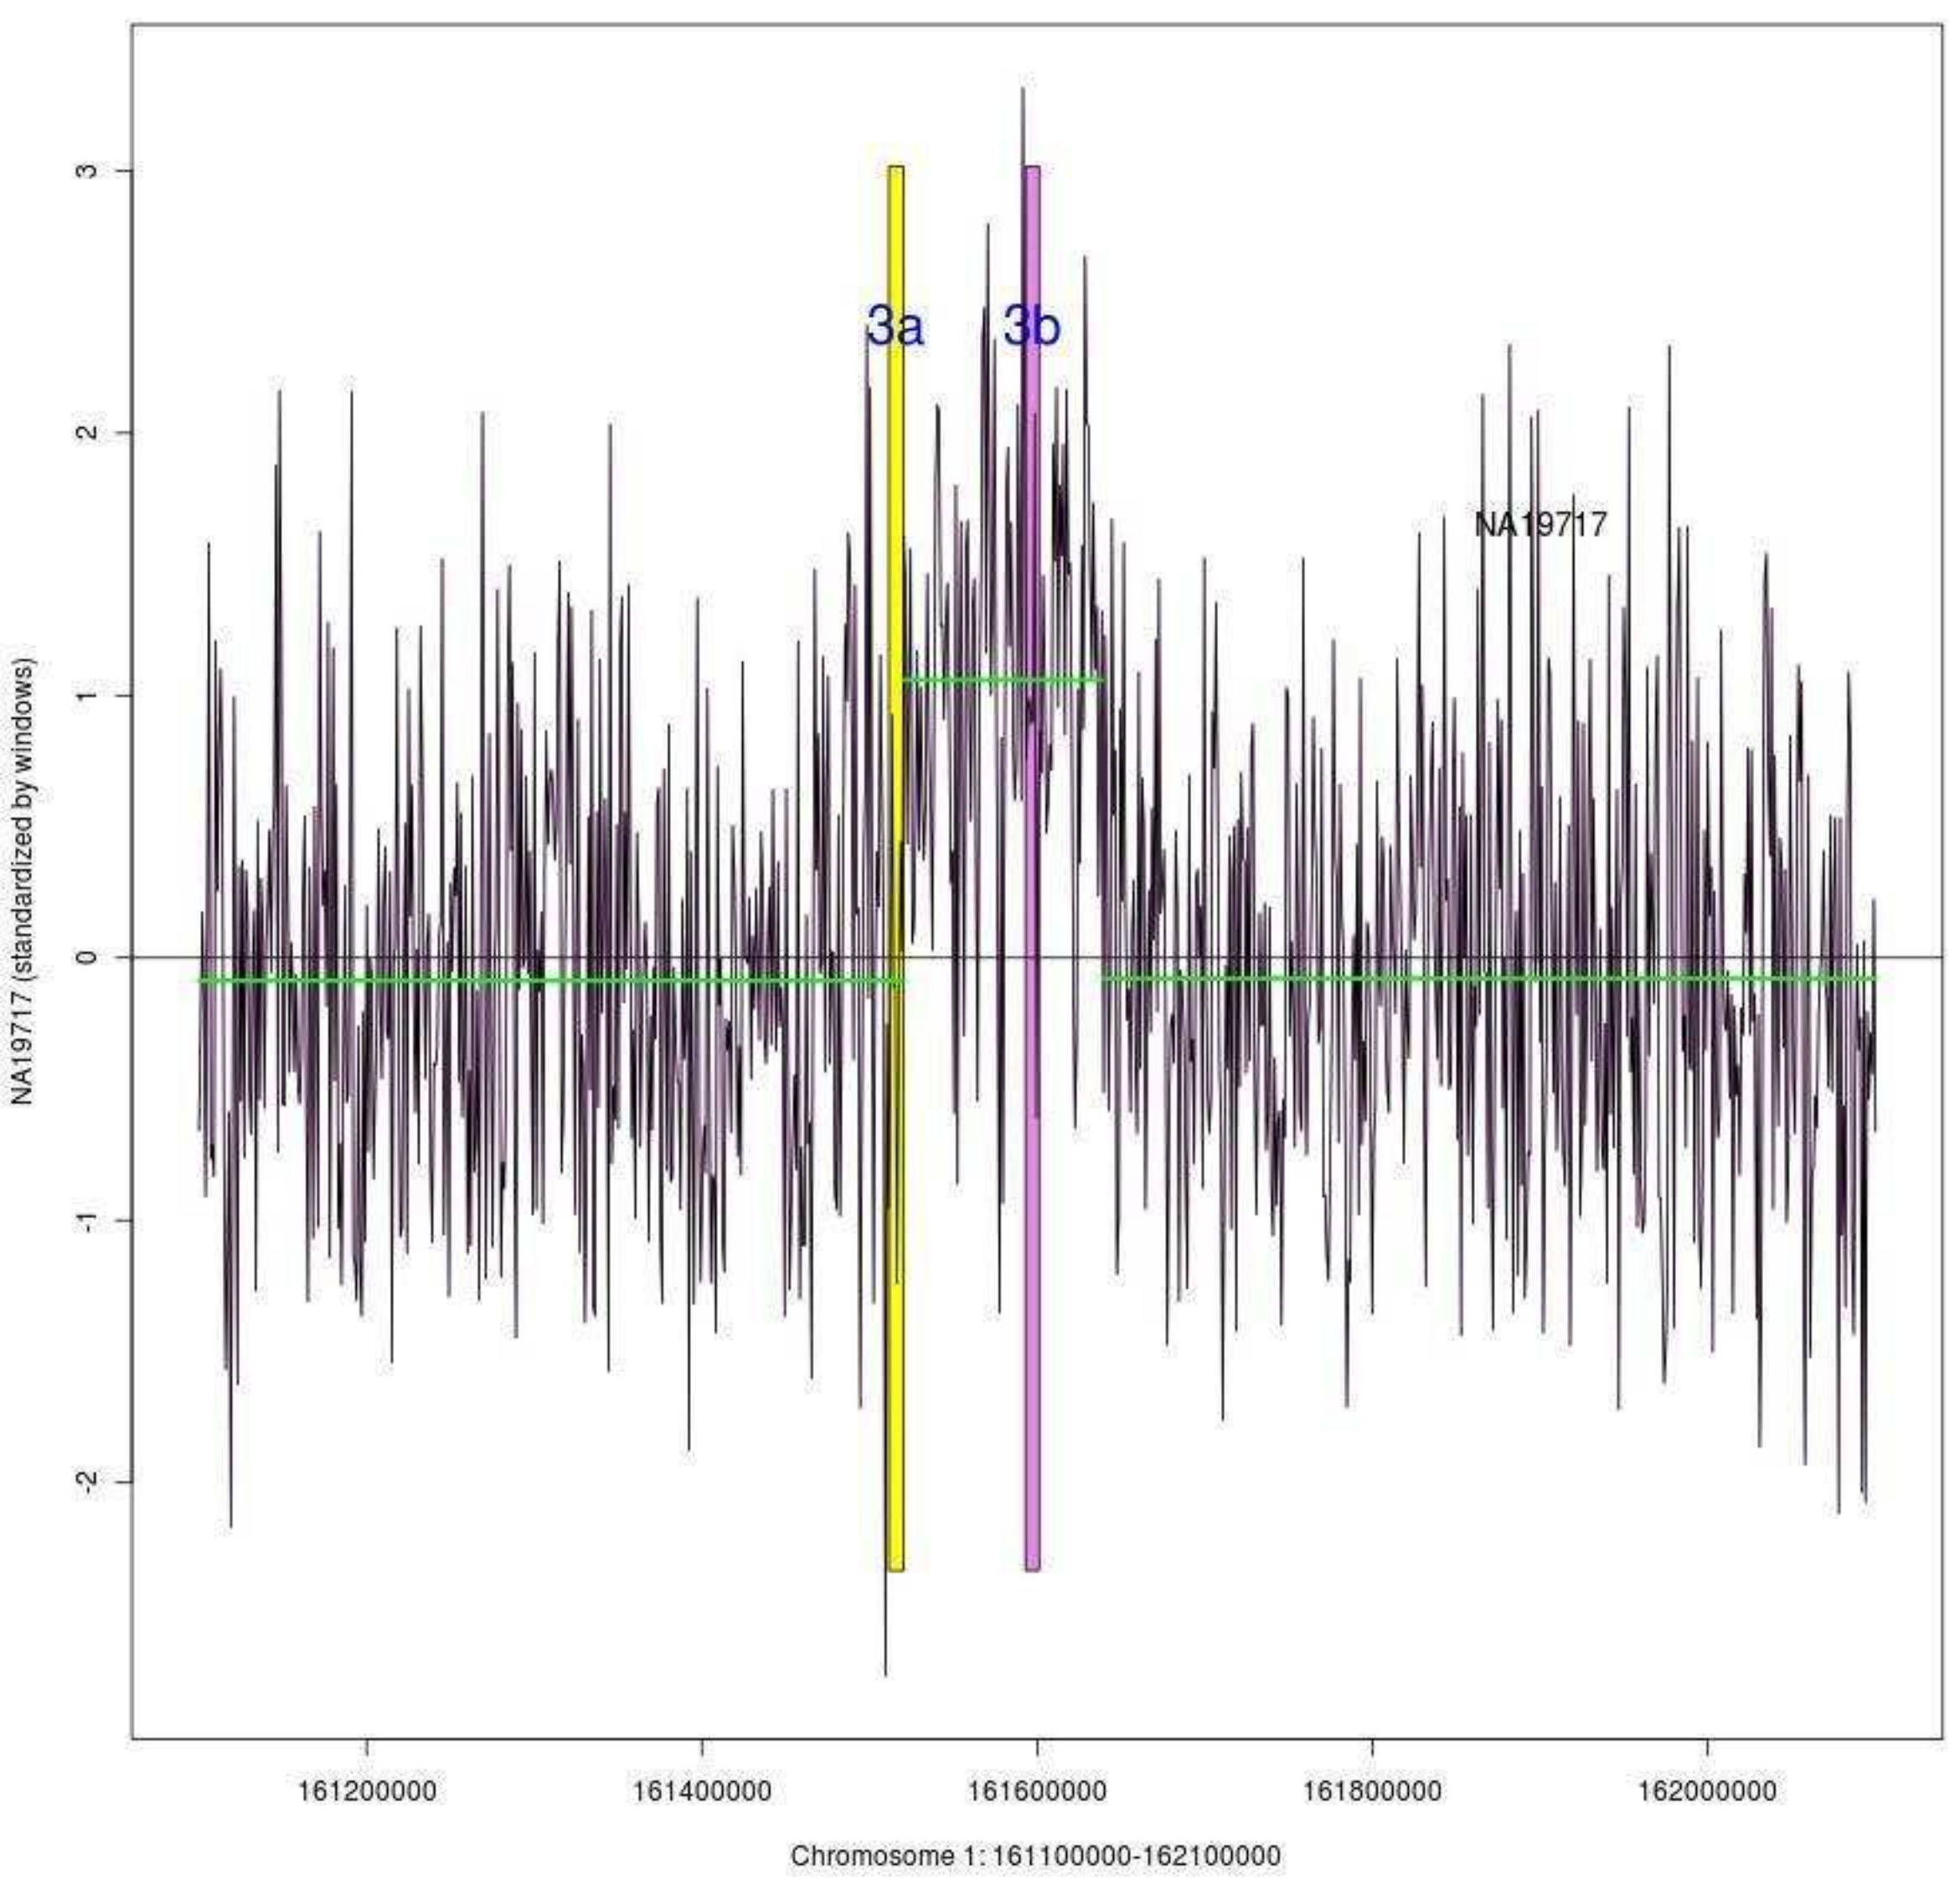

NA19731

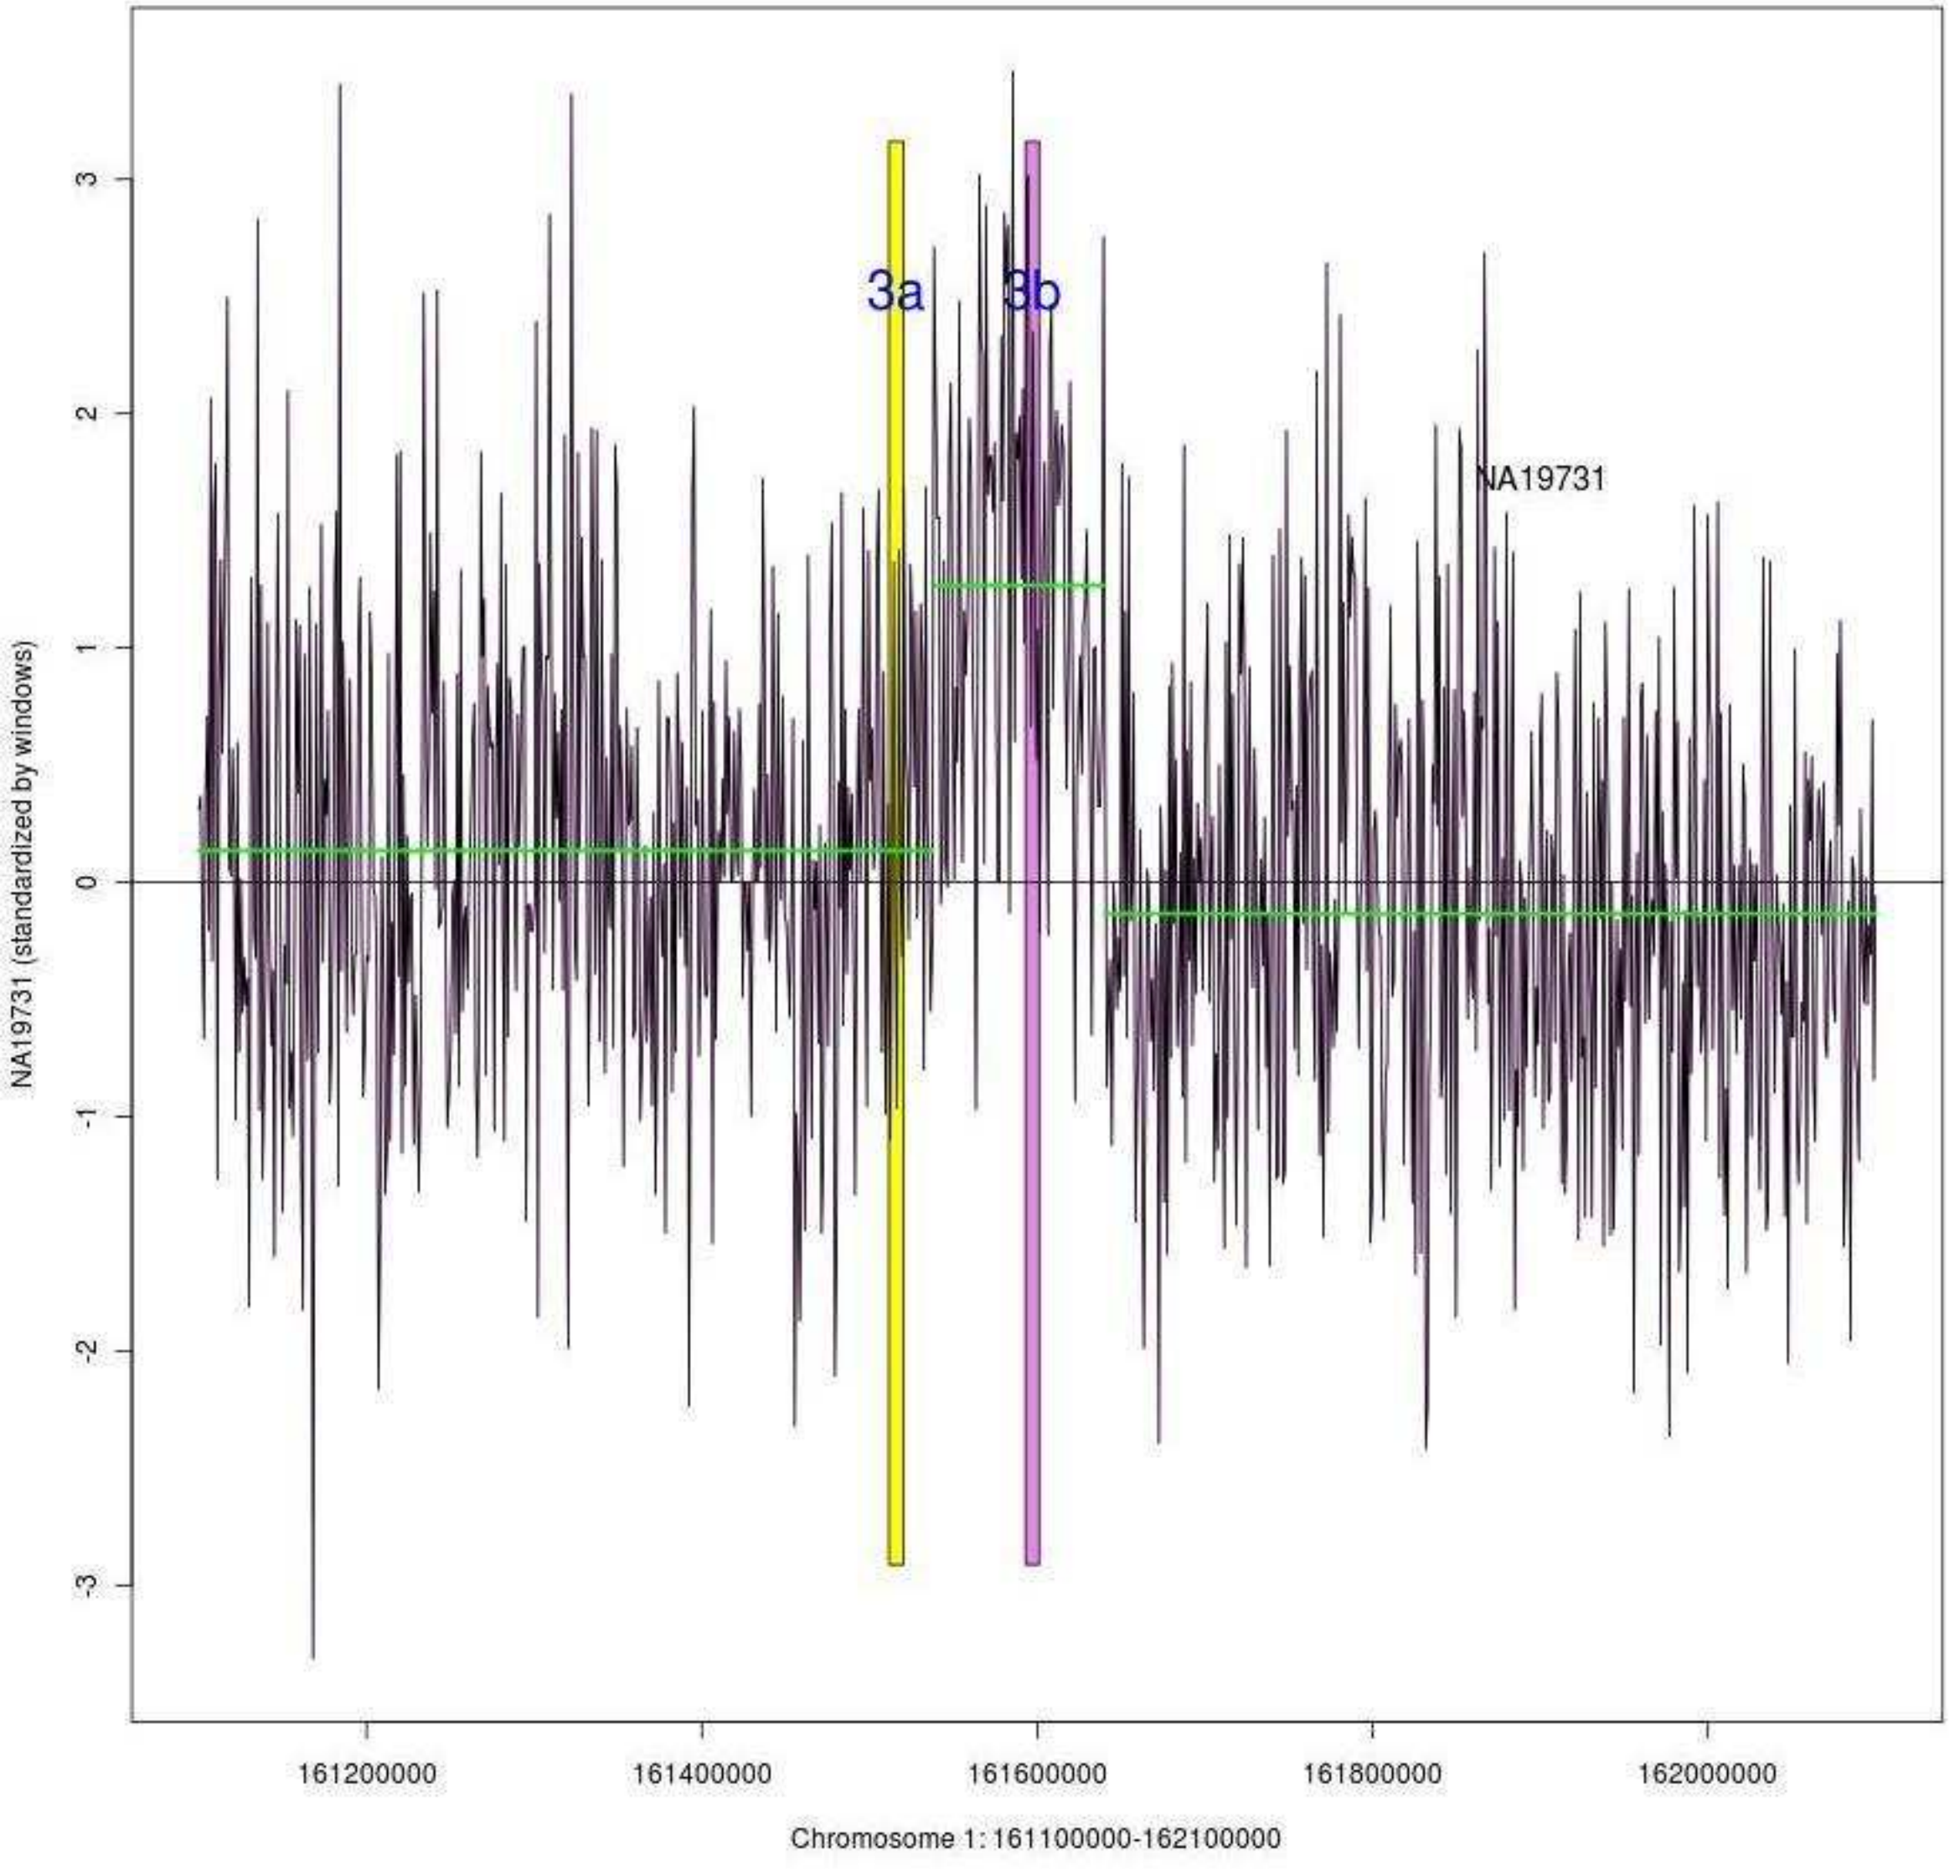

NA19749

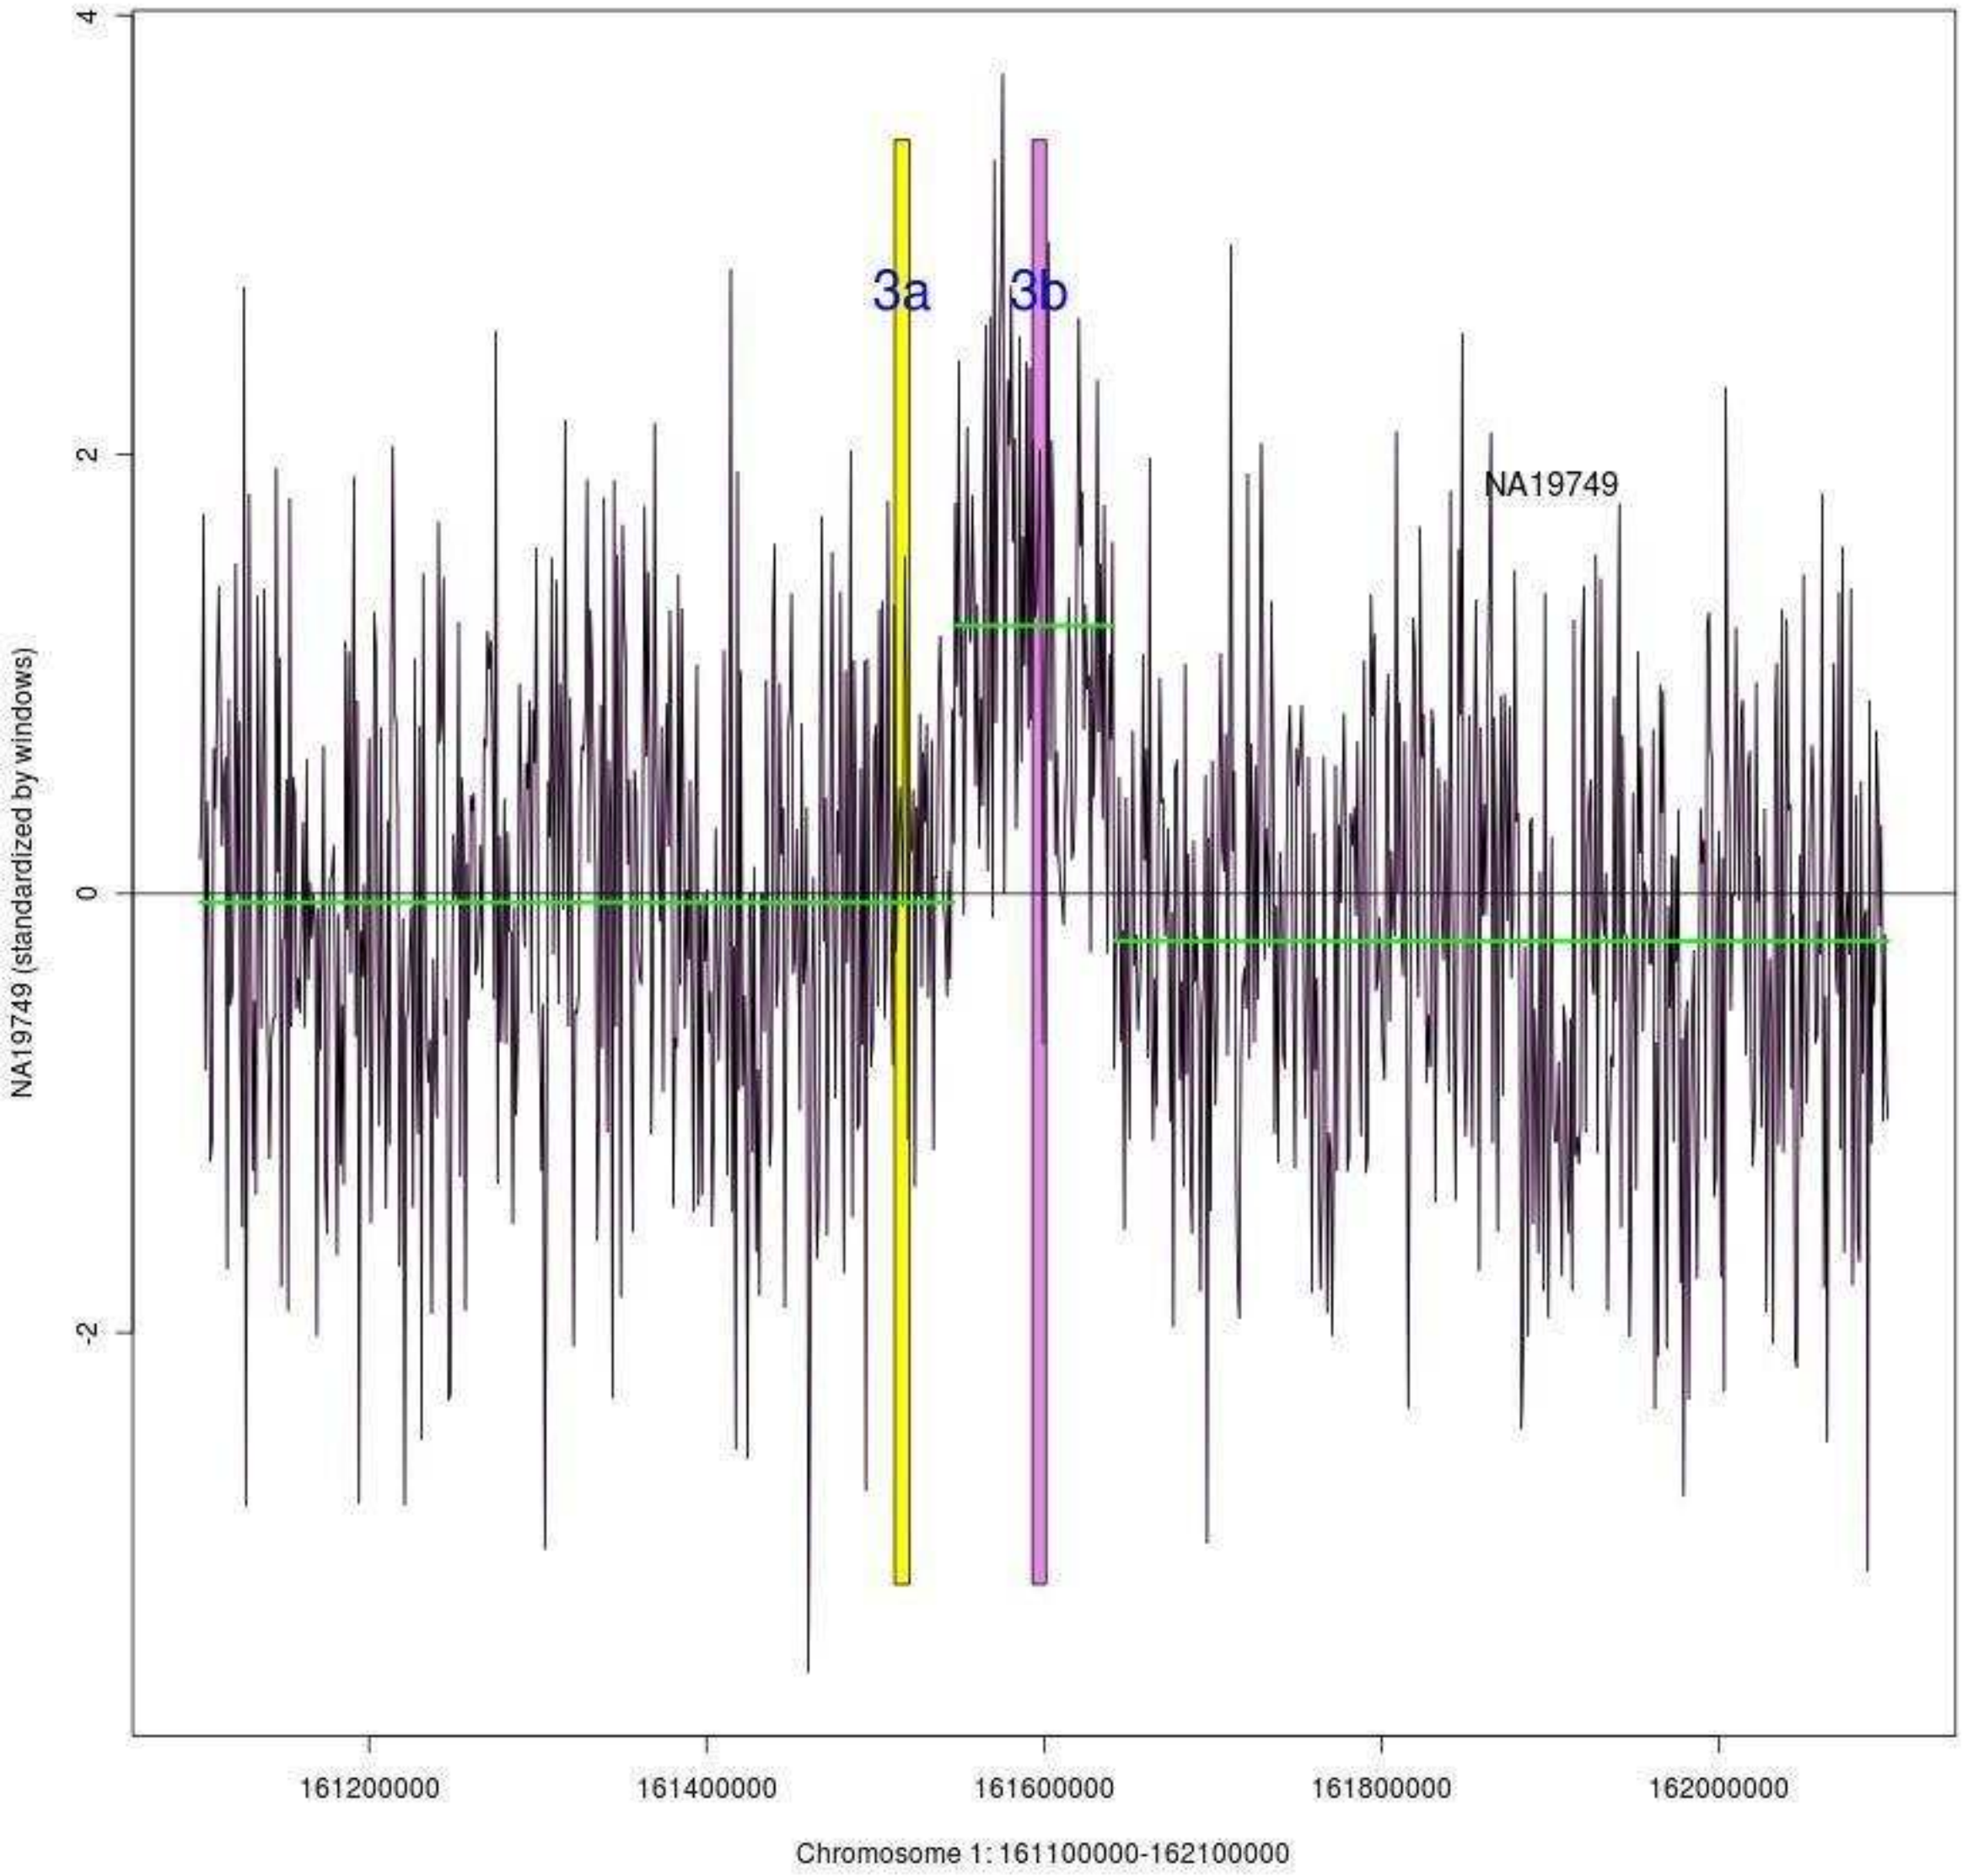



NA19756

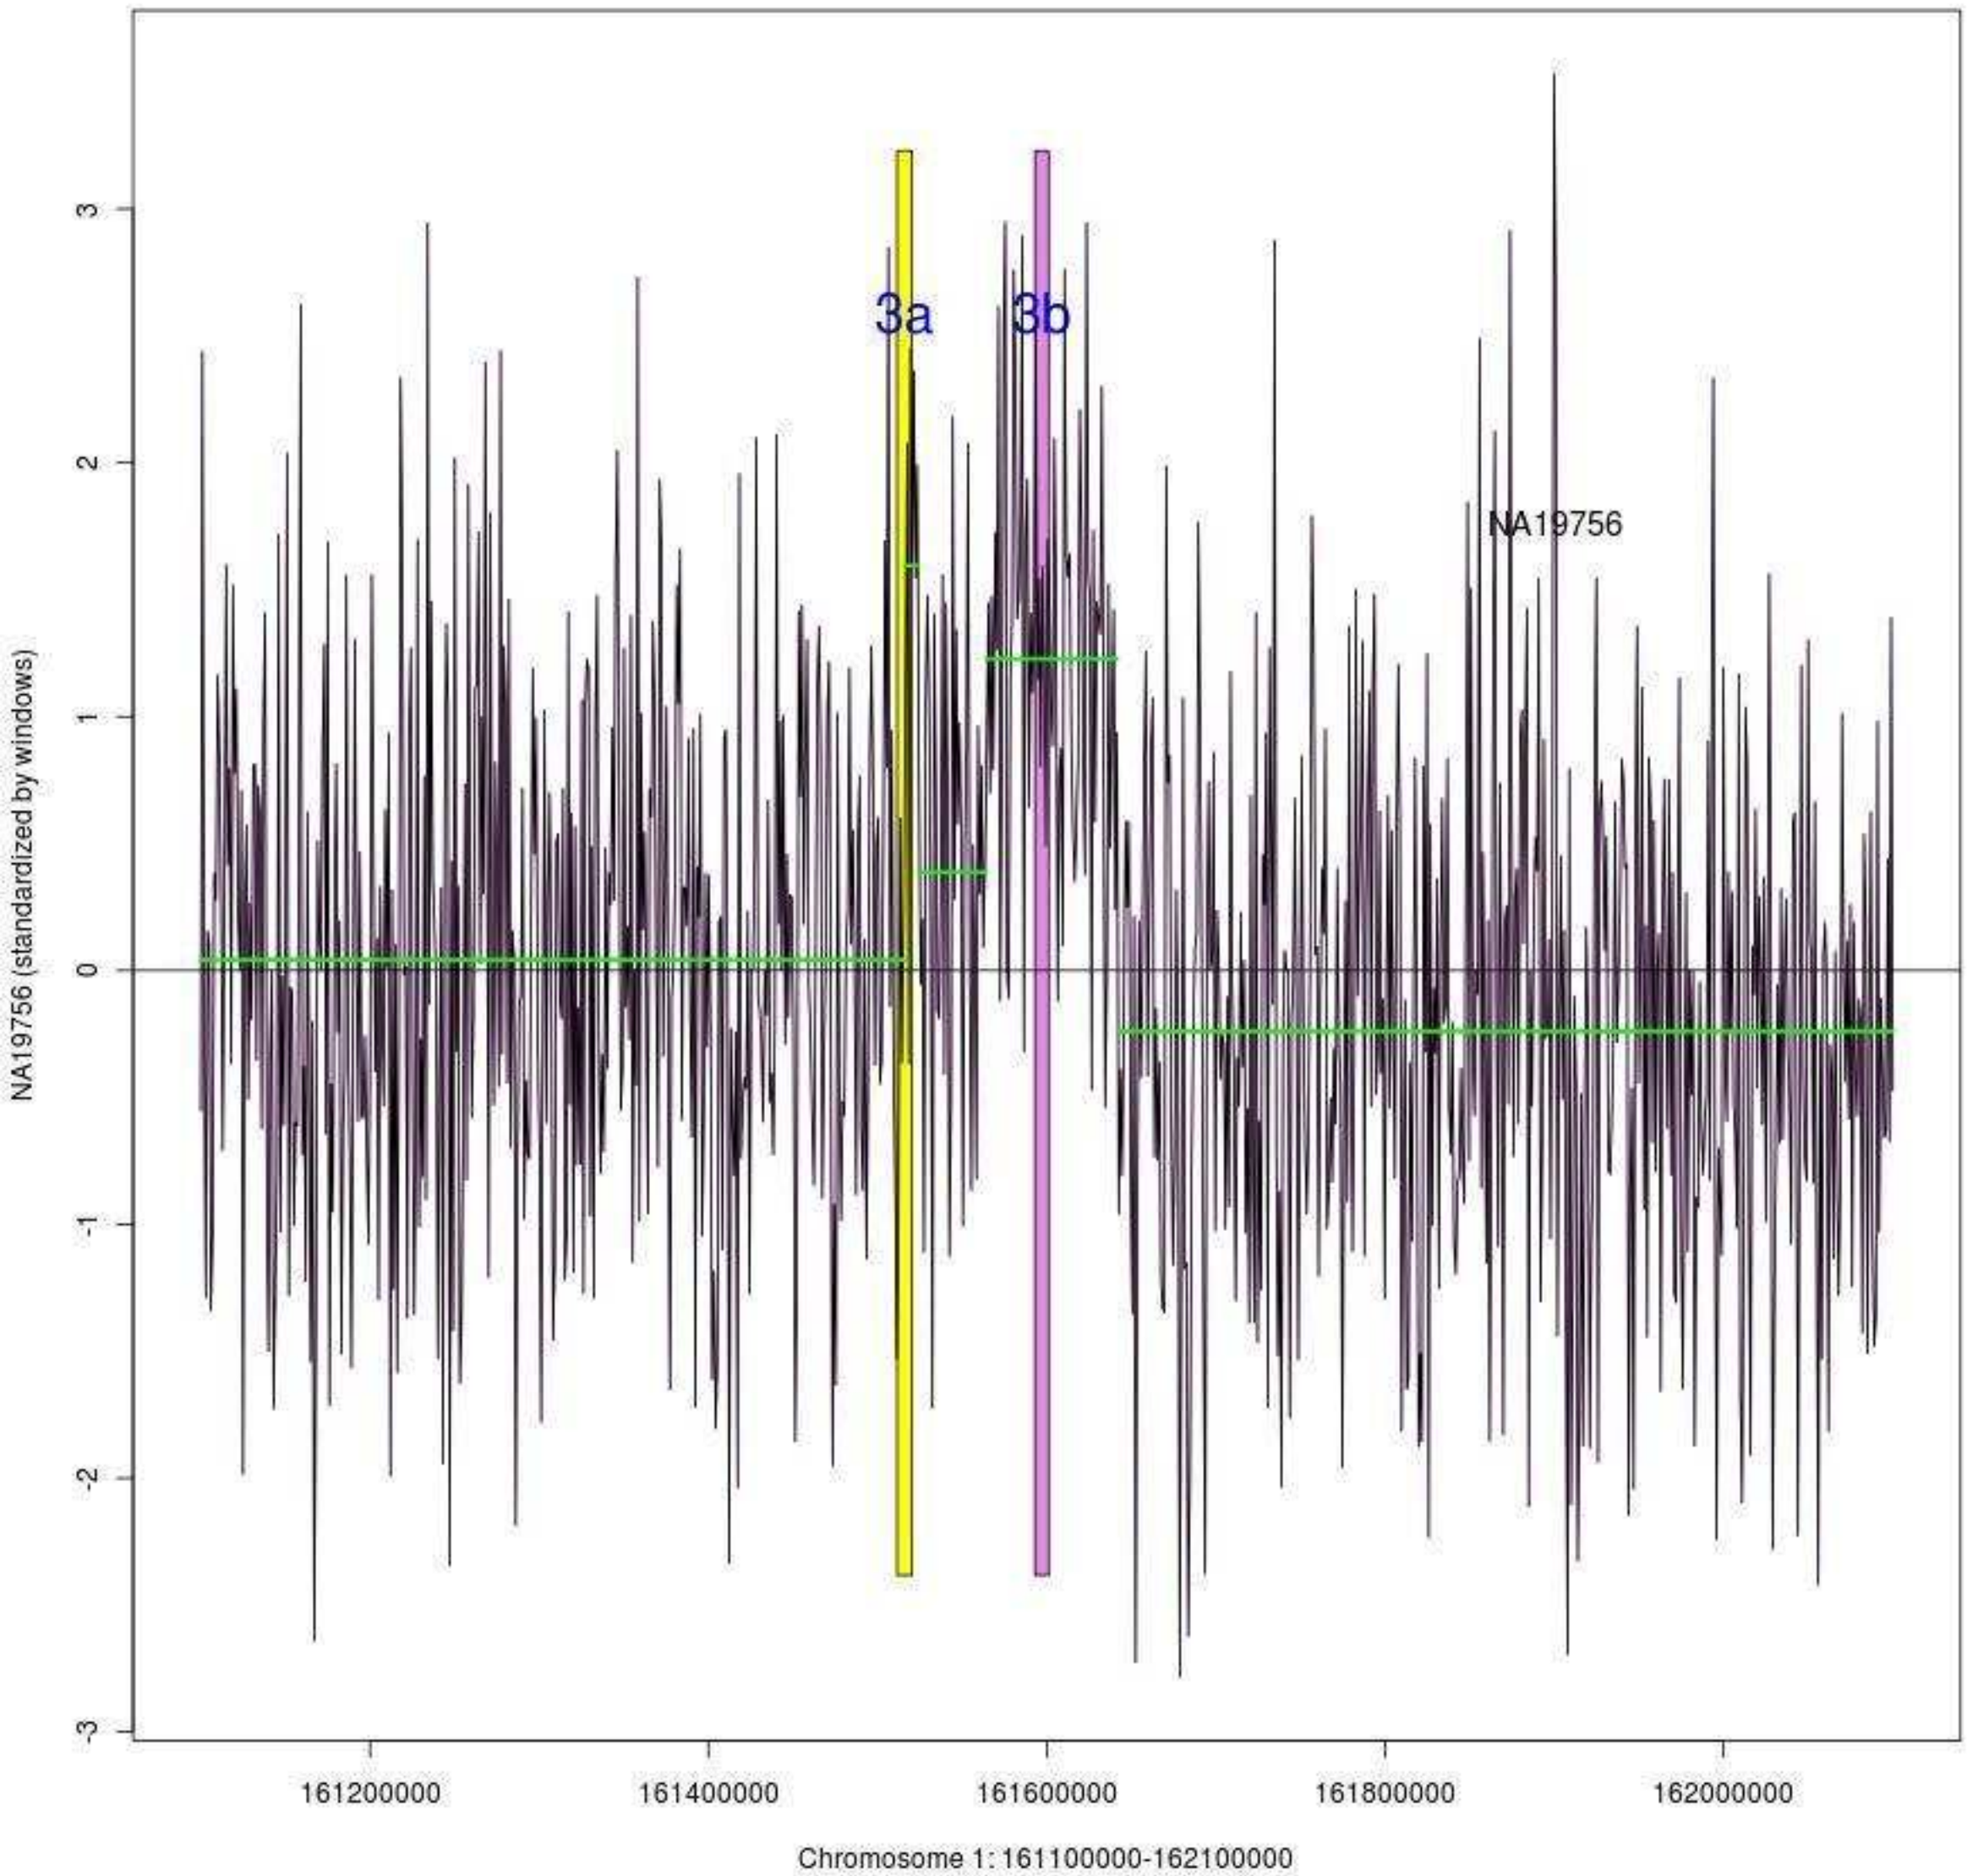

Supplement: pone.0063219.s006.pdf [file pone.0063219.s006.pdf]
