# Supplementary material for: CNVrd, a Read-Depth Algorithm for Assigning Copy-Number at the FCGR Locus: Population-Specific Tagging of Copy Number Variation at FCGR3B
Source: PubMed Central journal article supplement (PMC3640002; doi:10.1371/journal.pone.0063219), 2013-04-30

NA19651

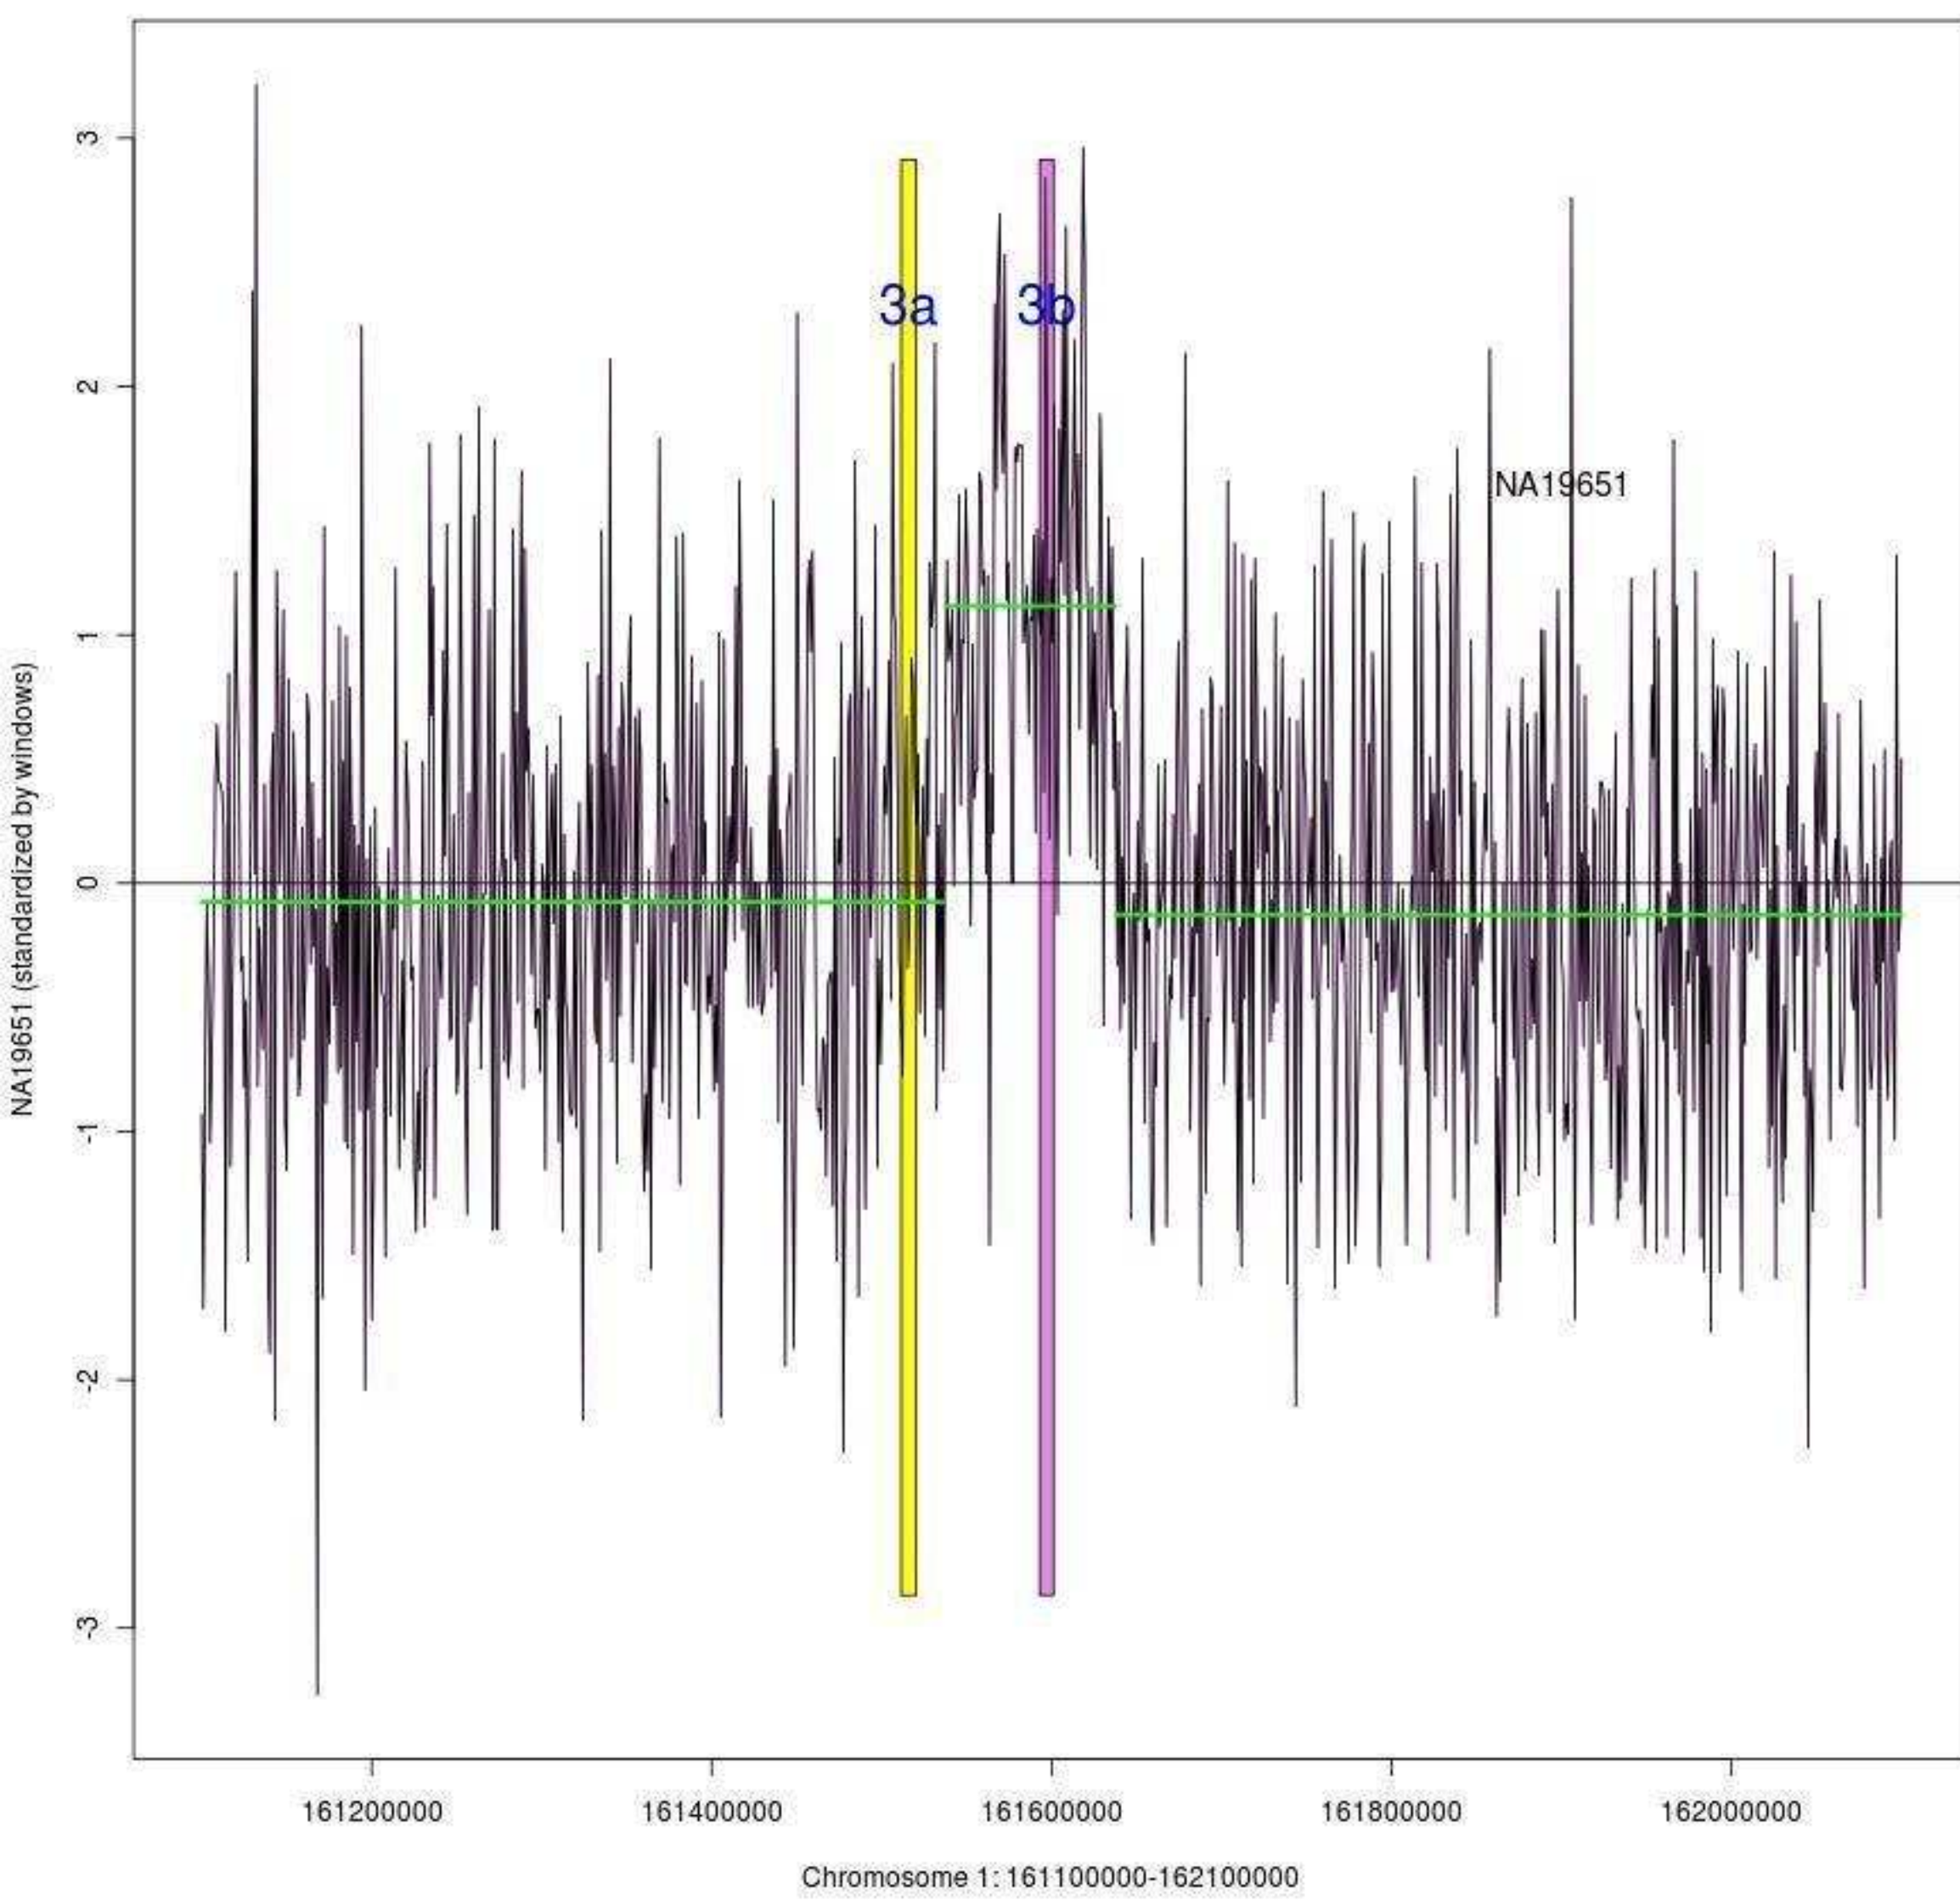

NA19652

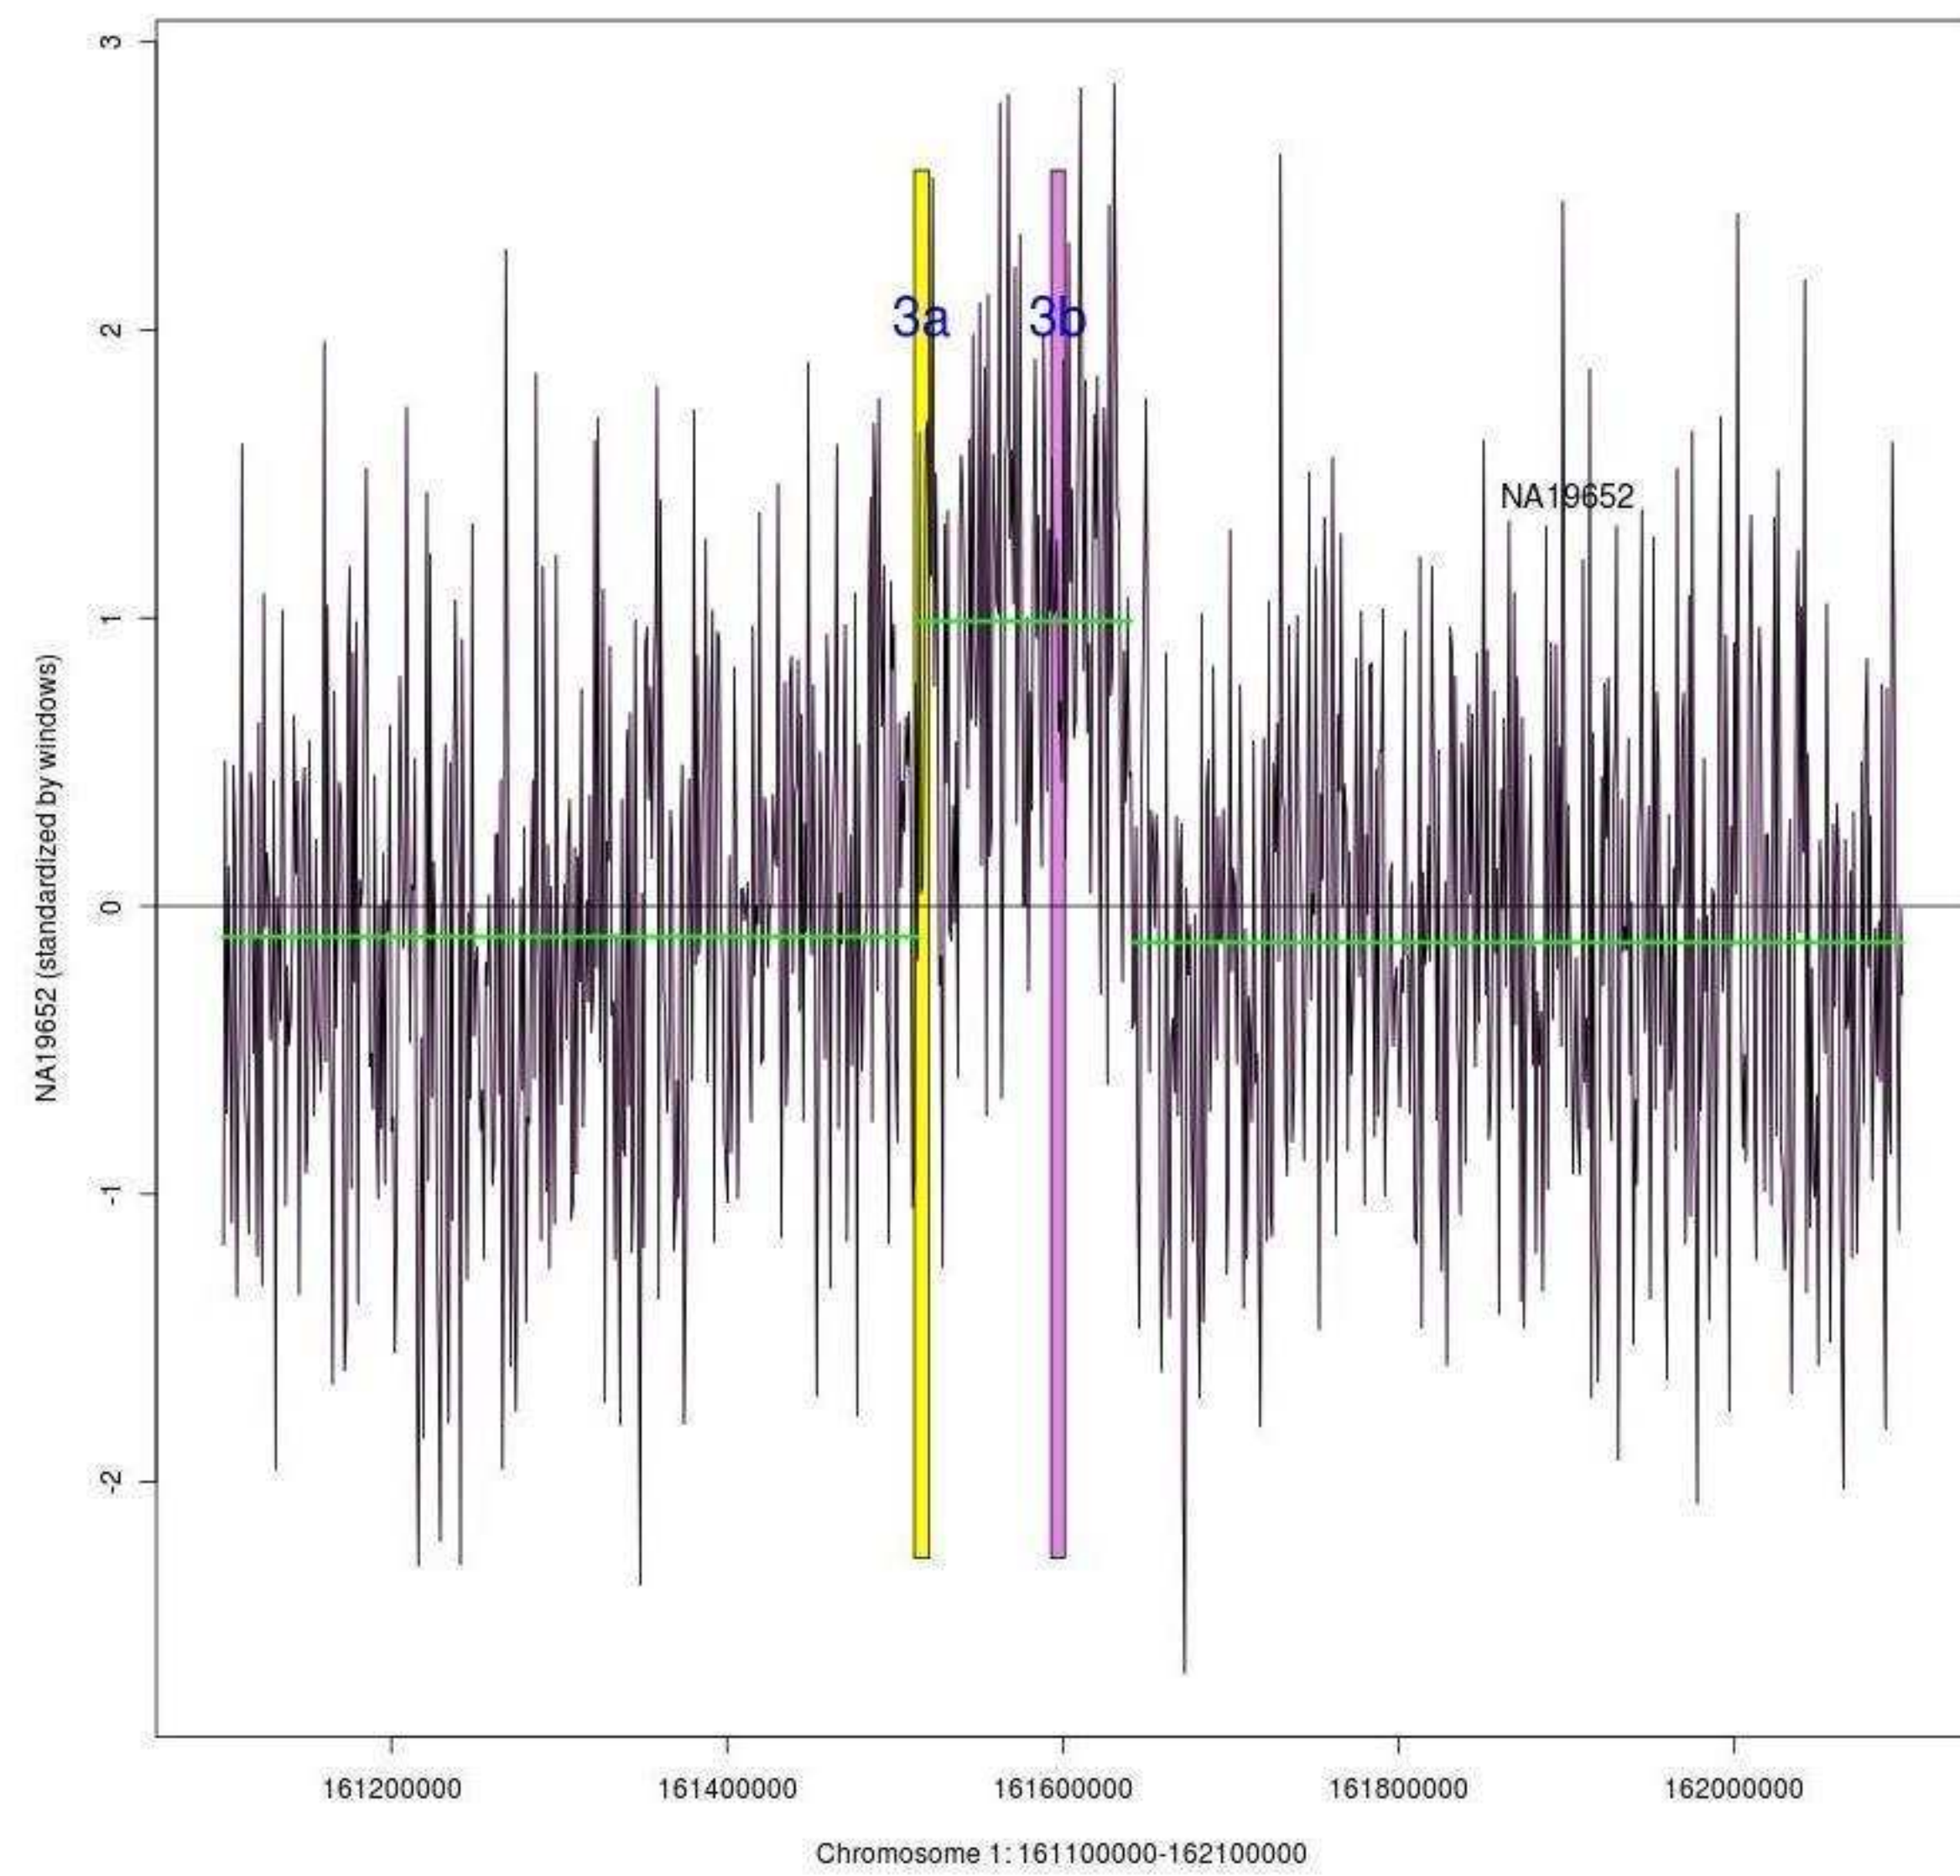

NA19657

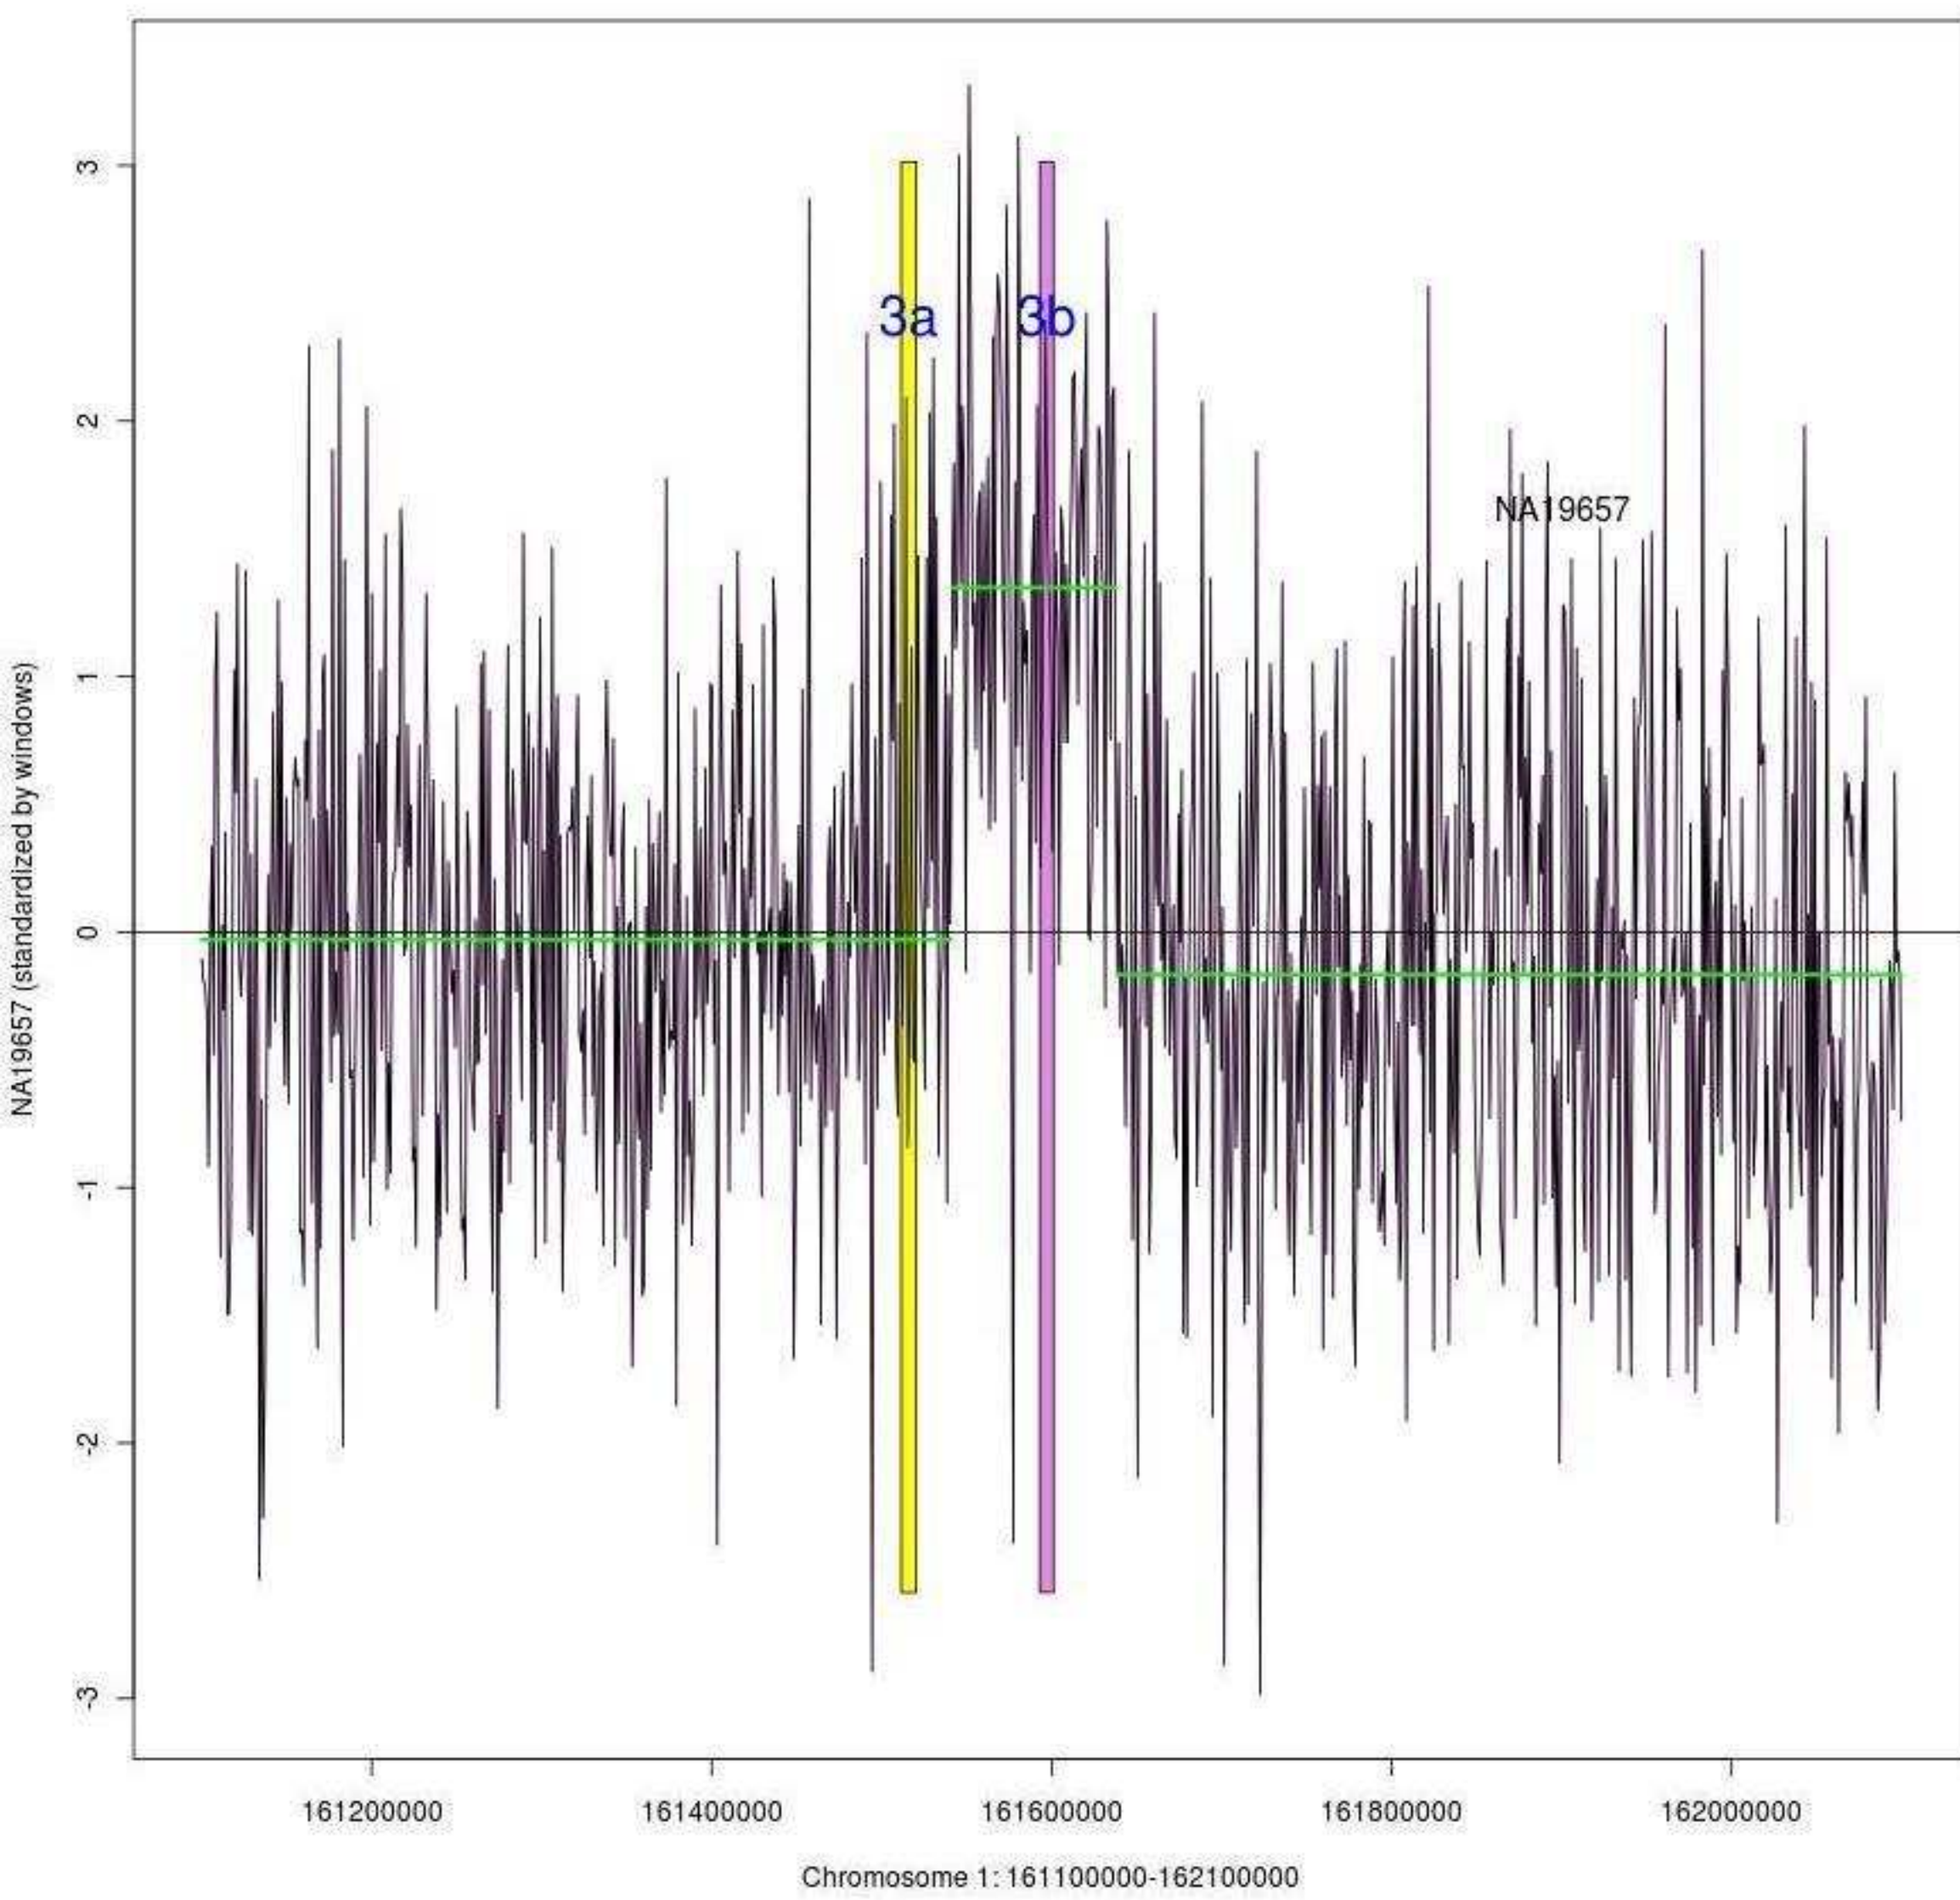

NA19681

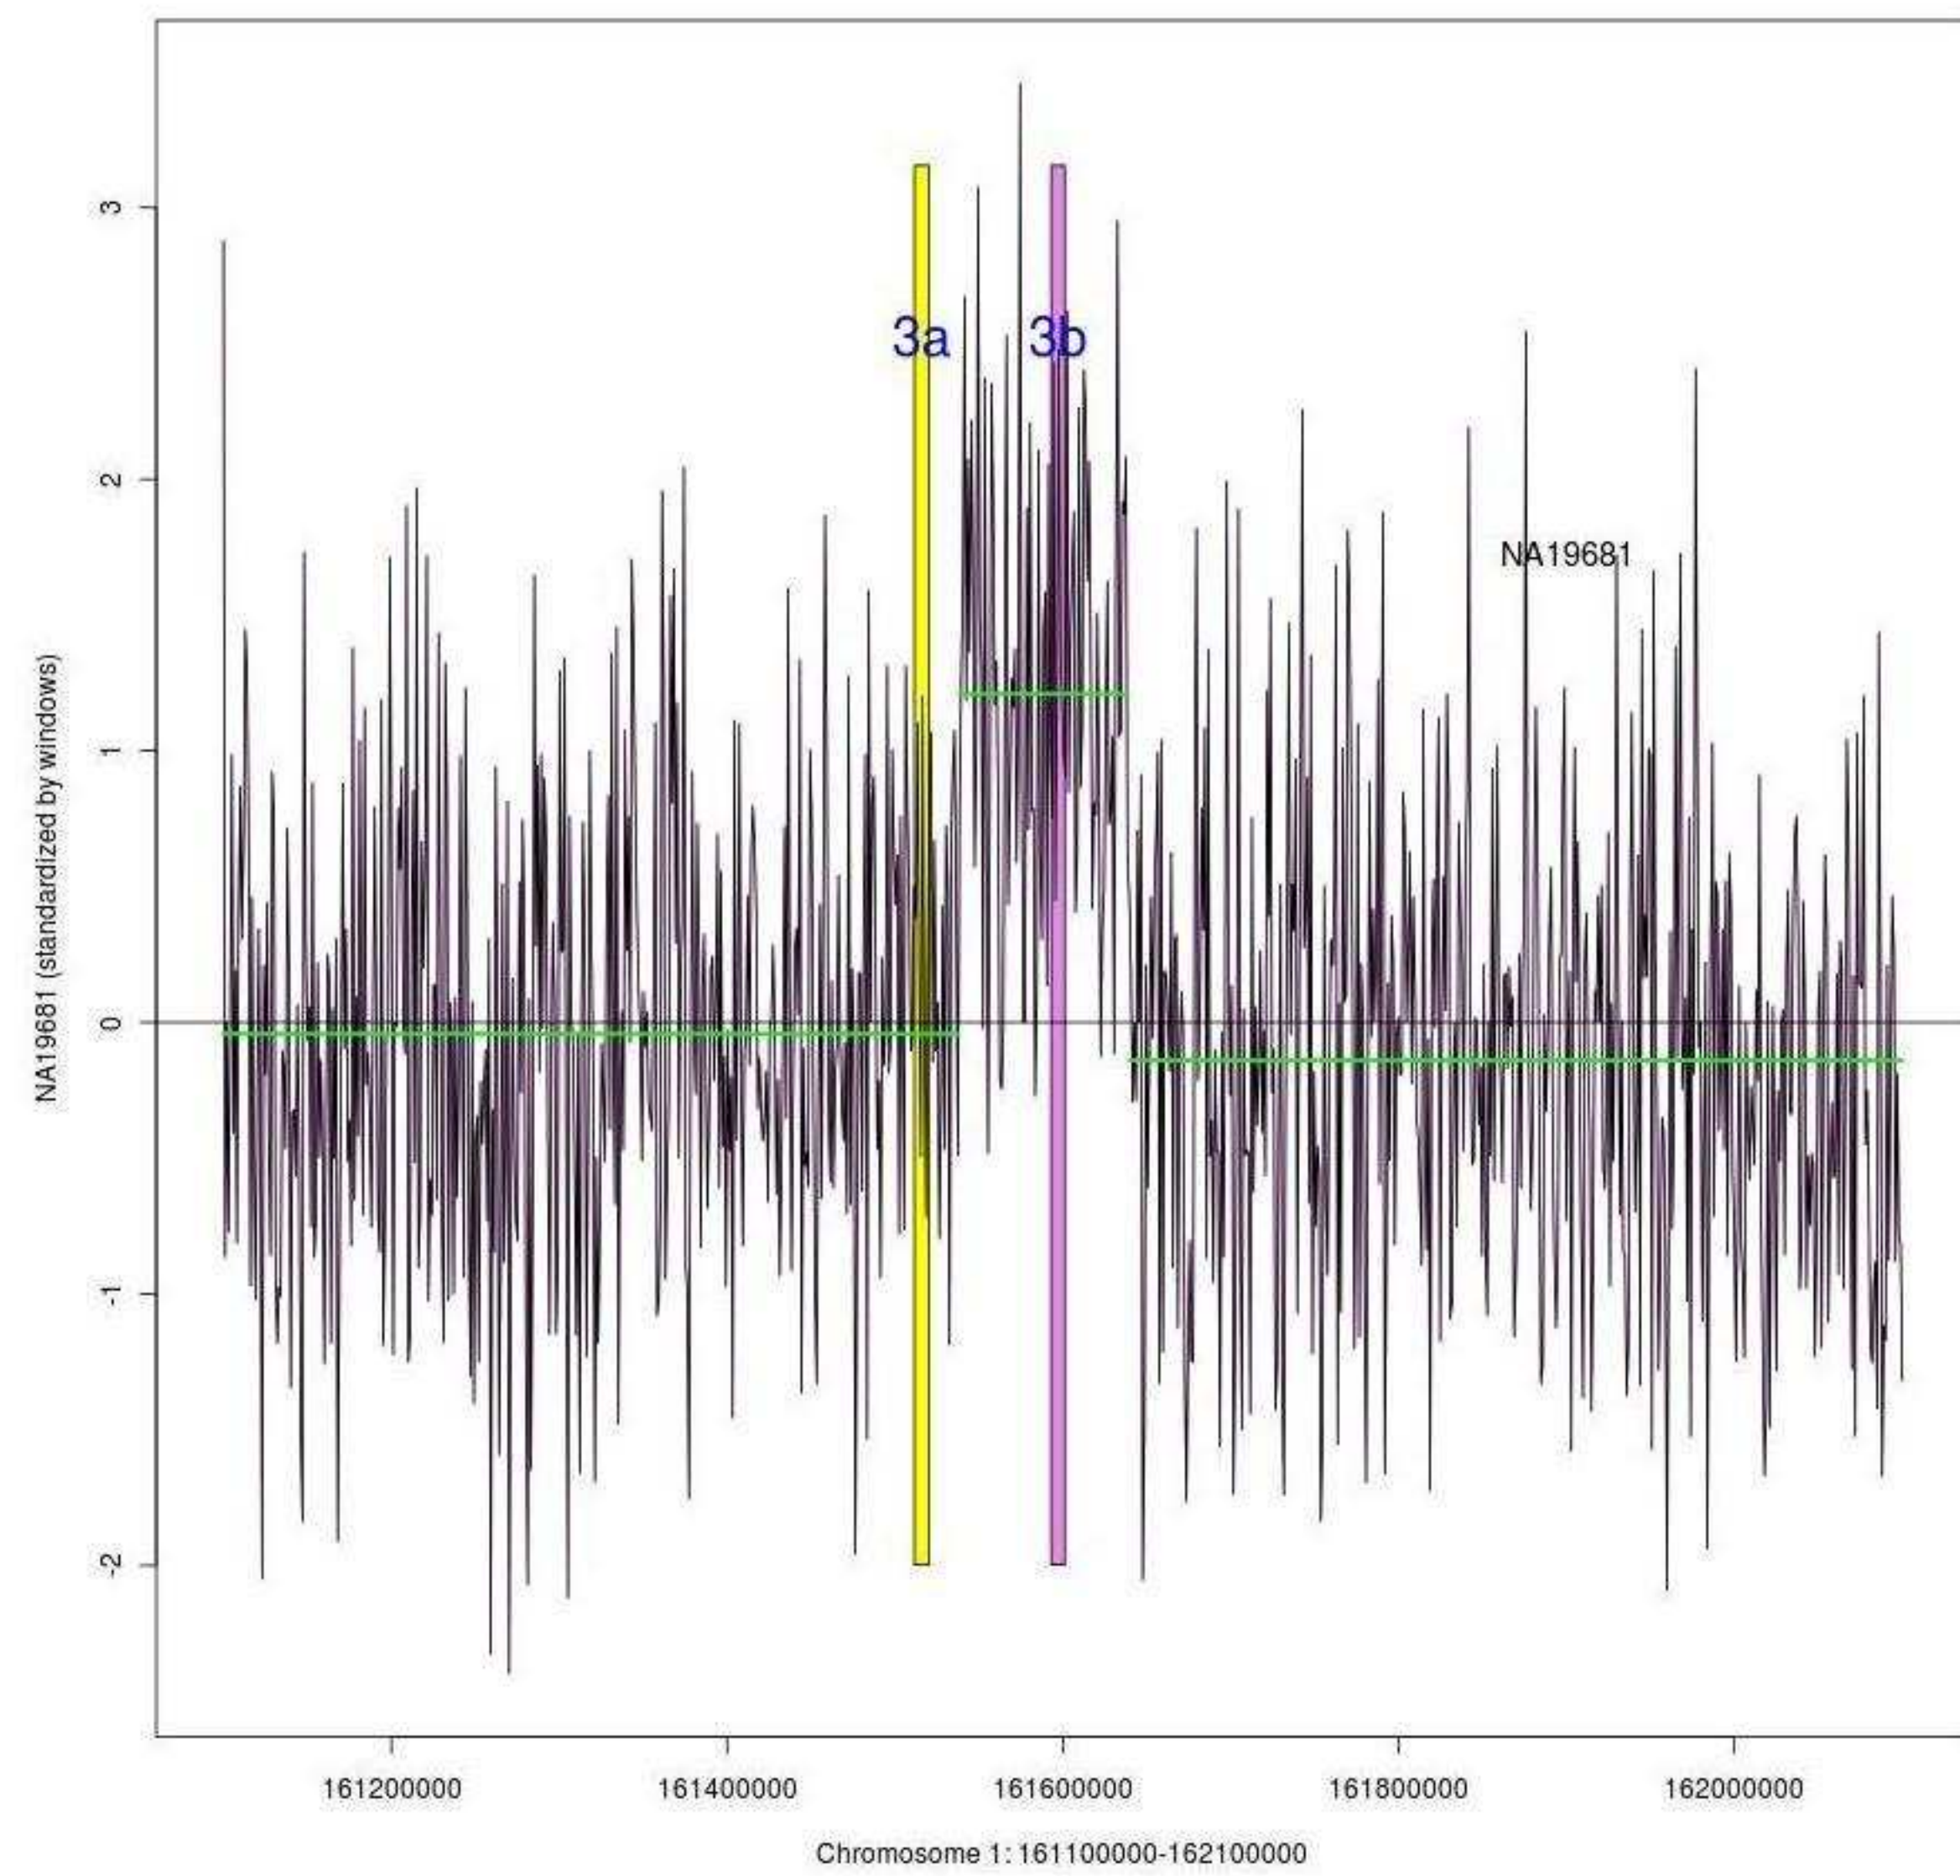



NA19717

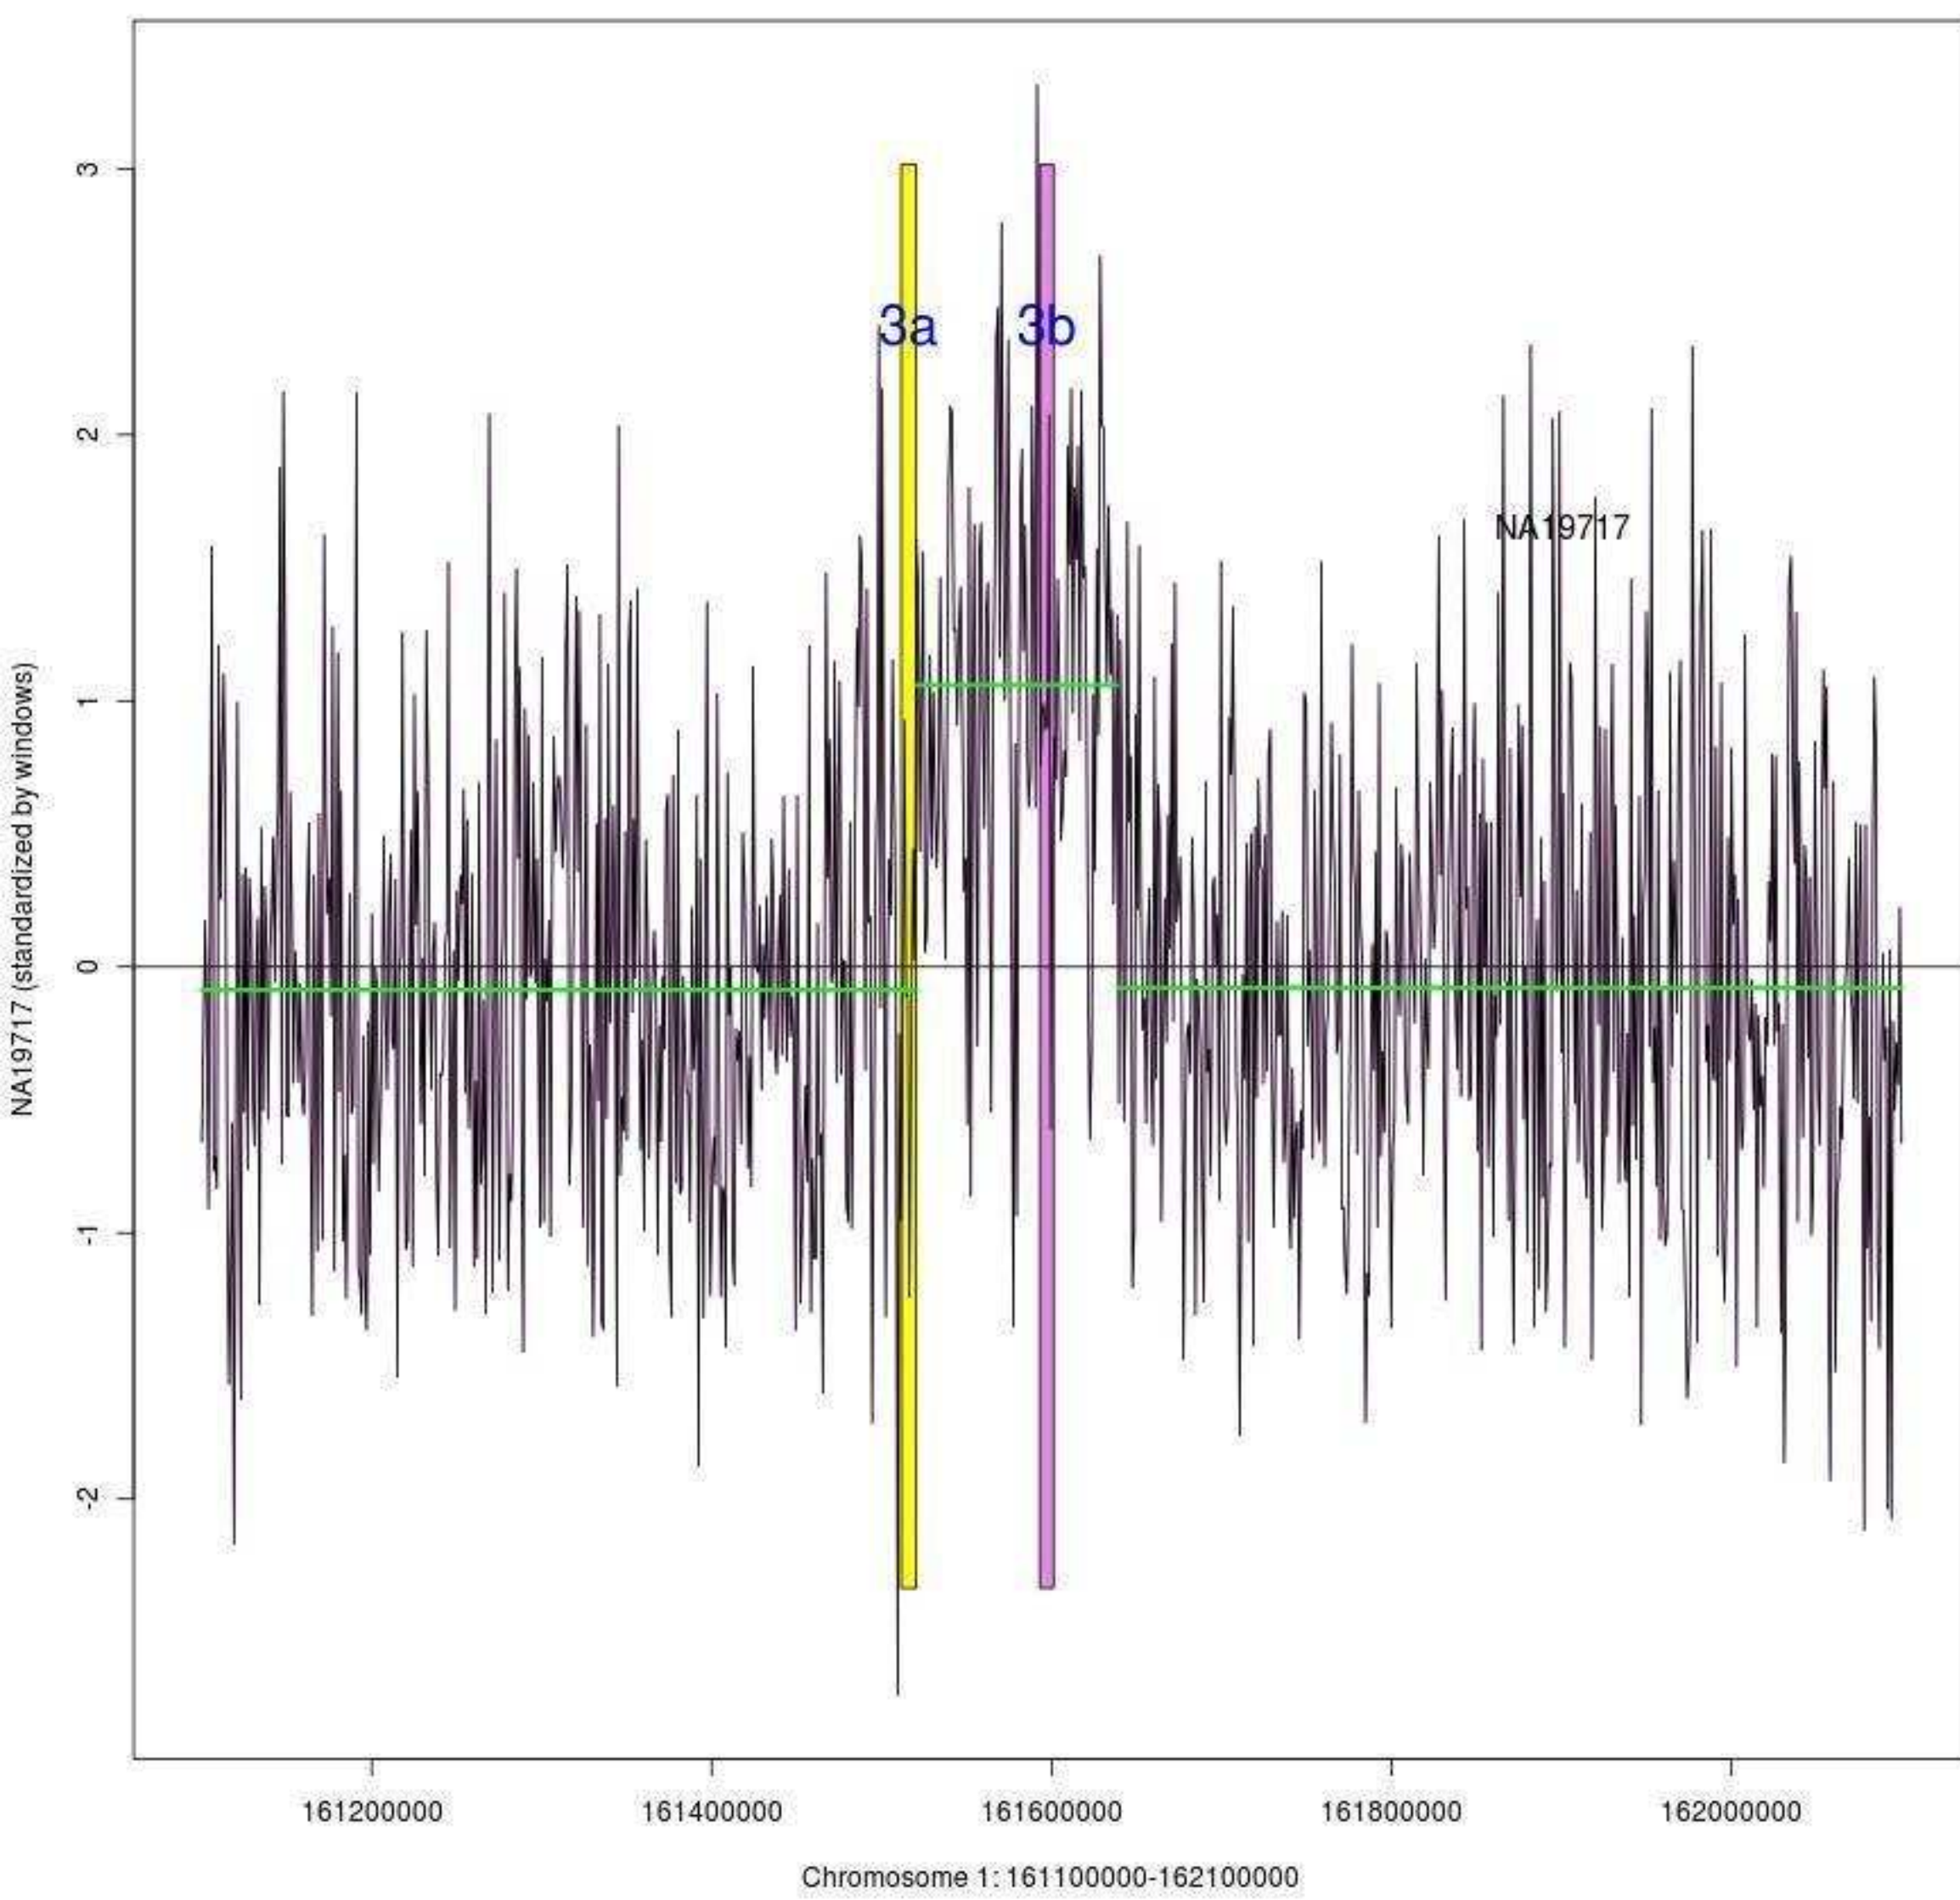

NA19719

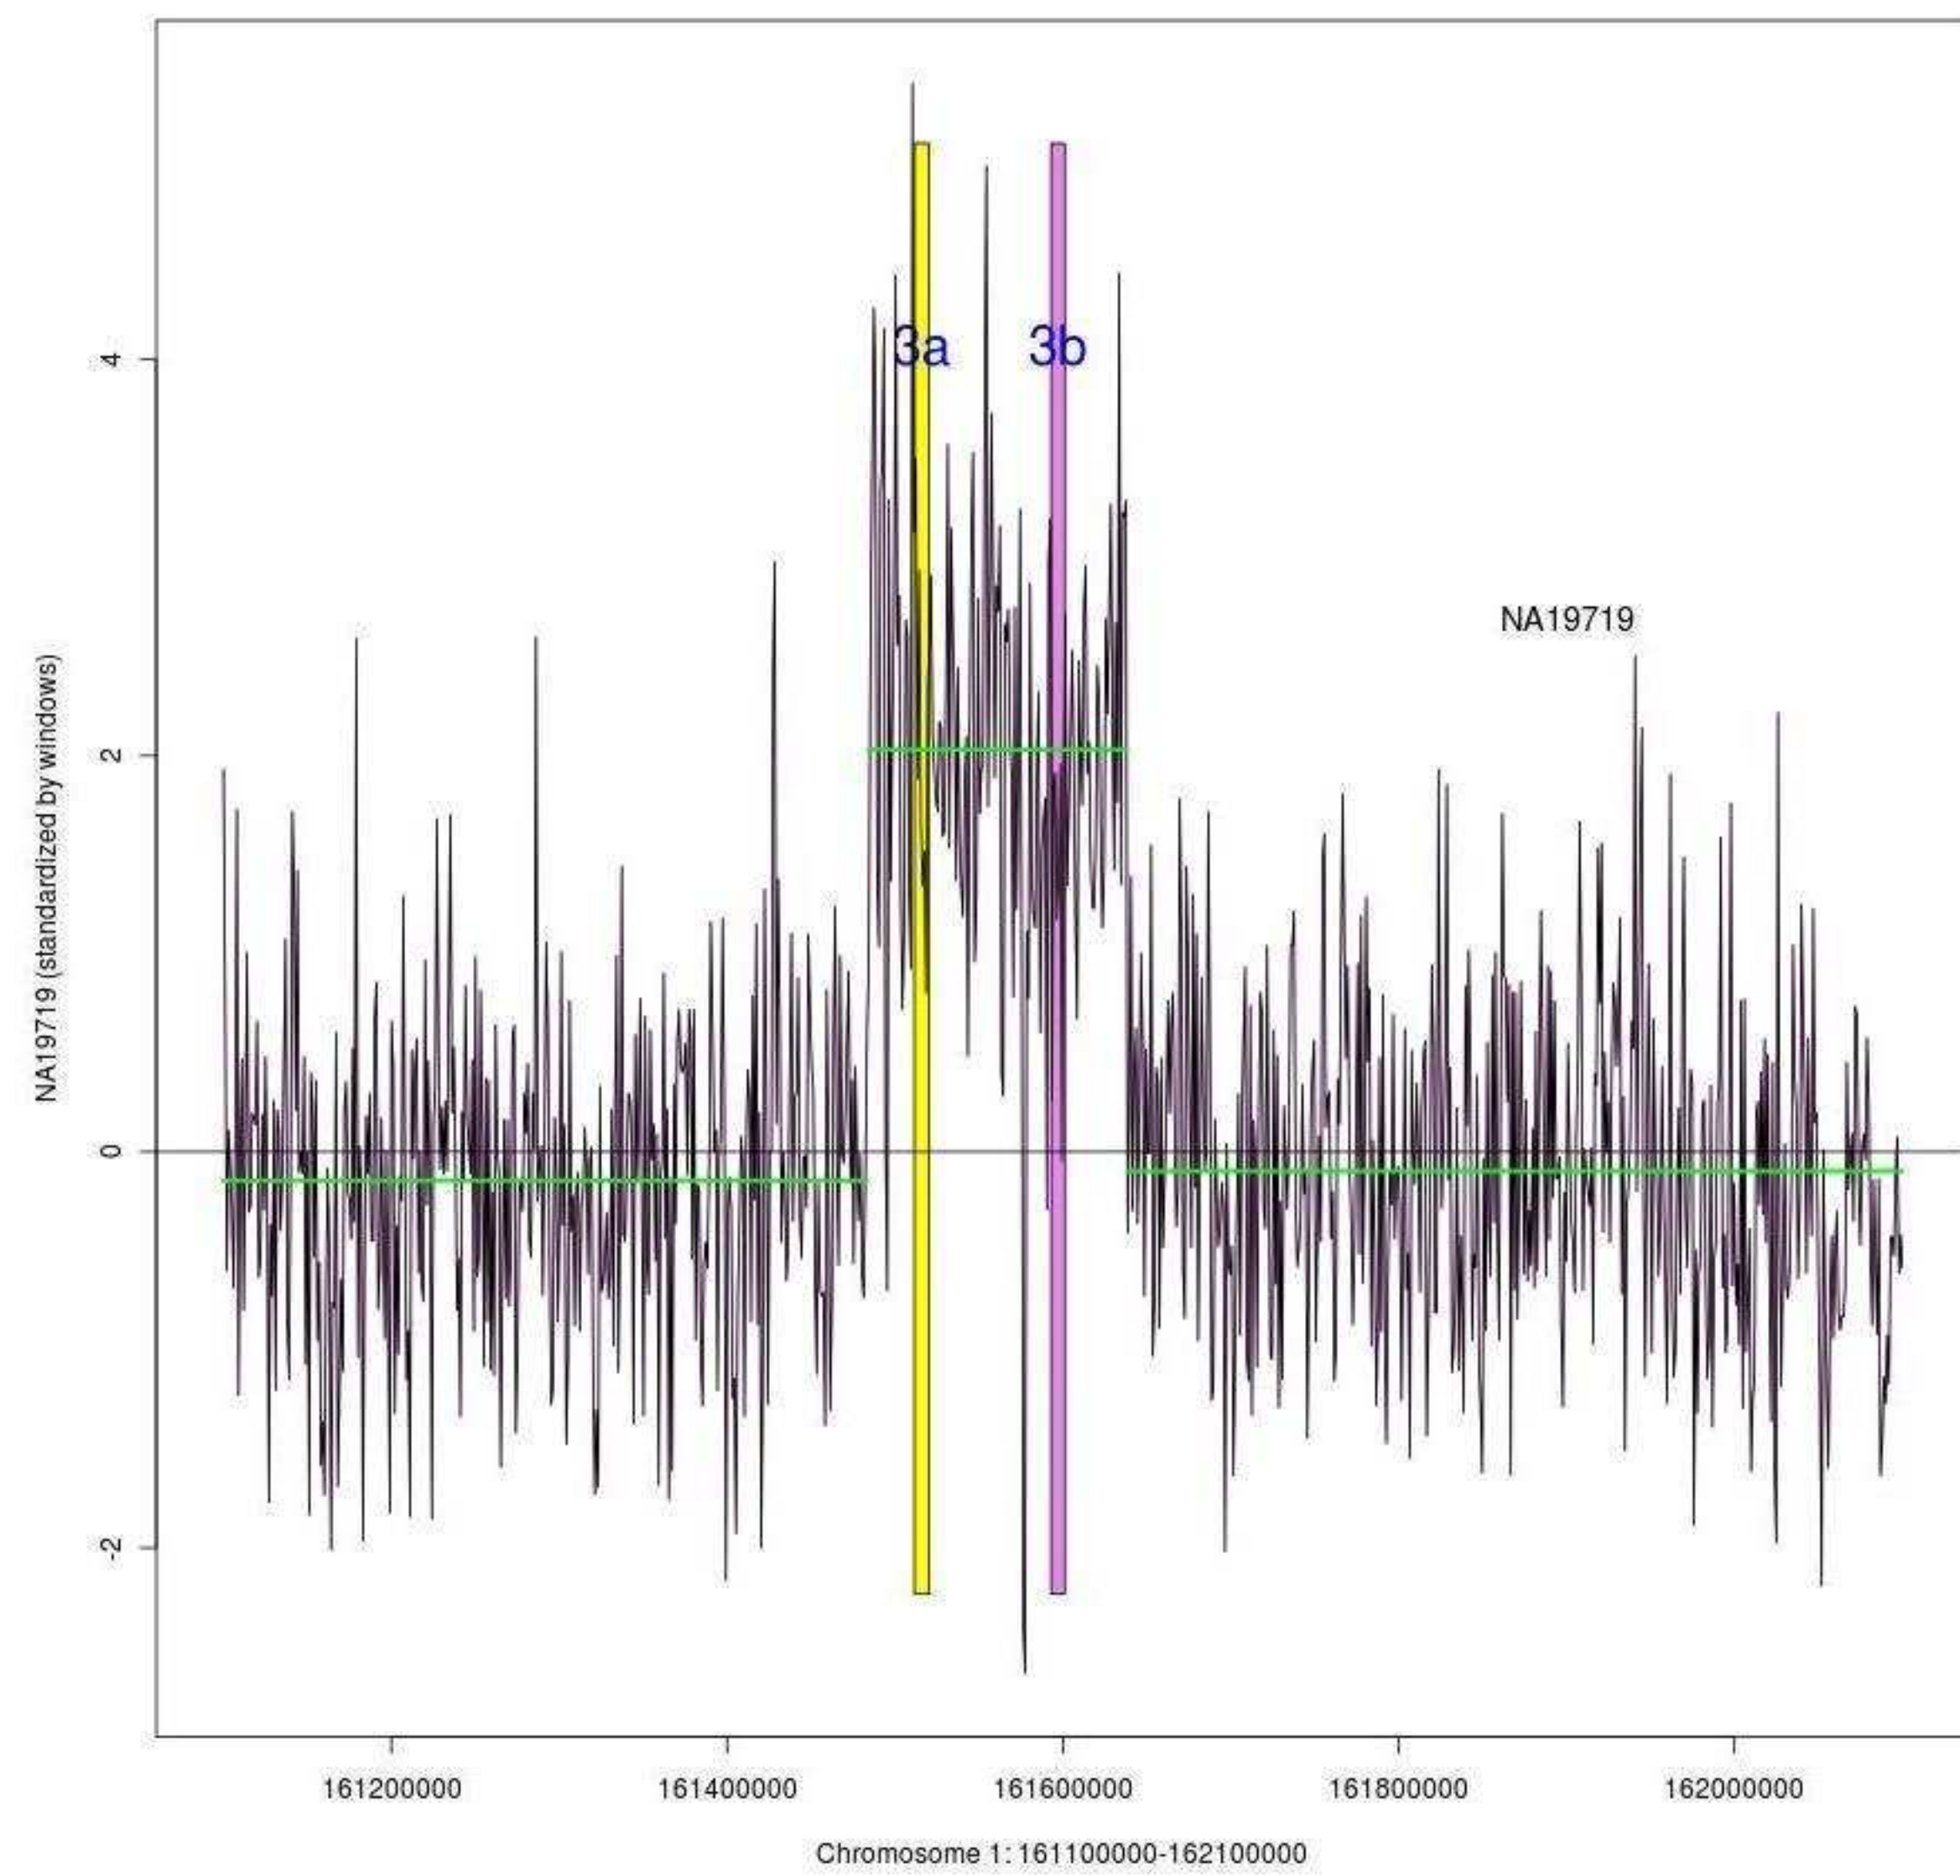

NA19728

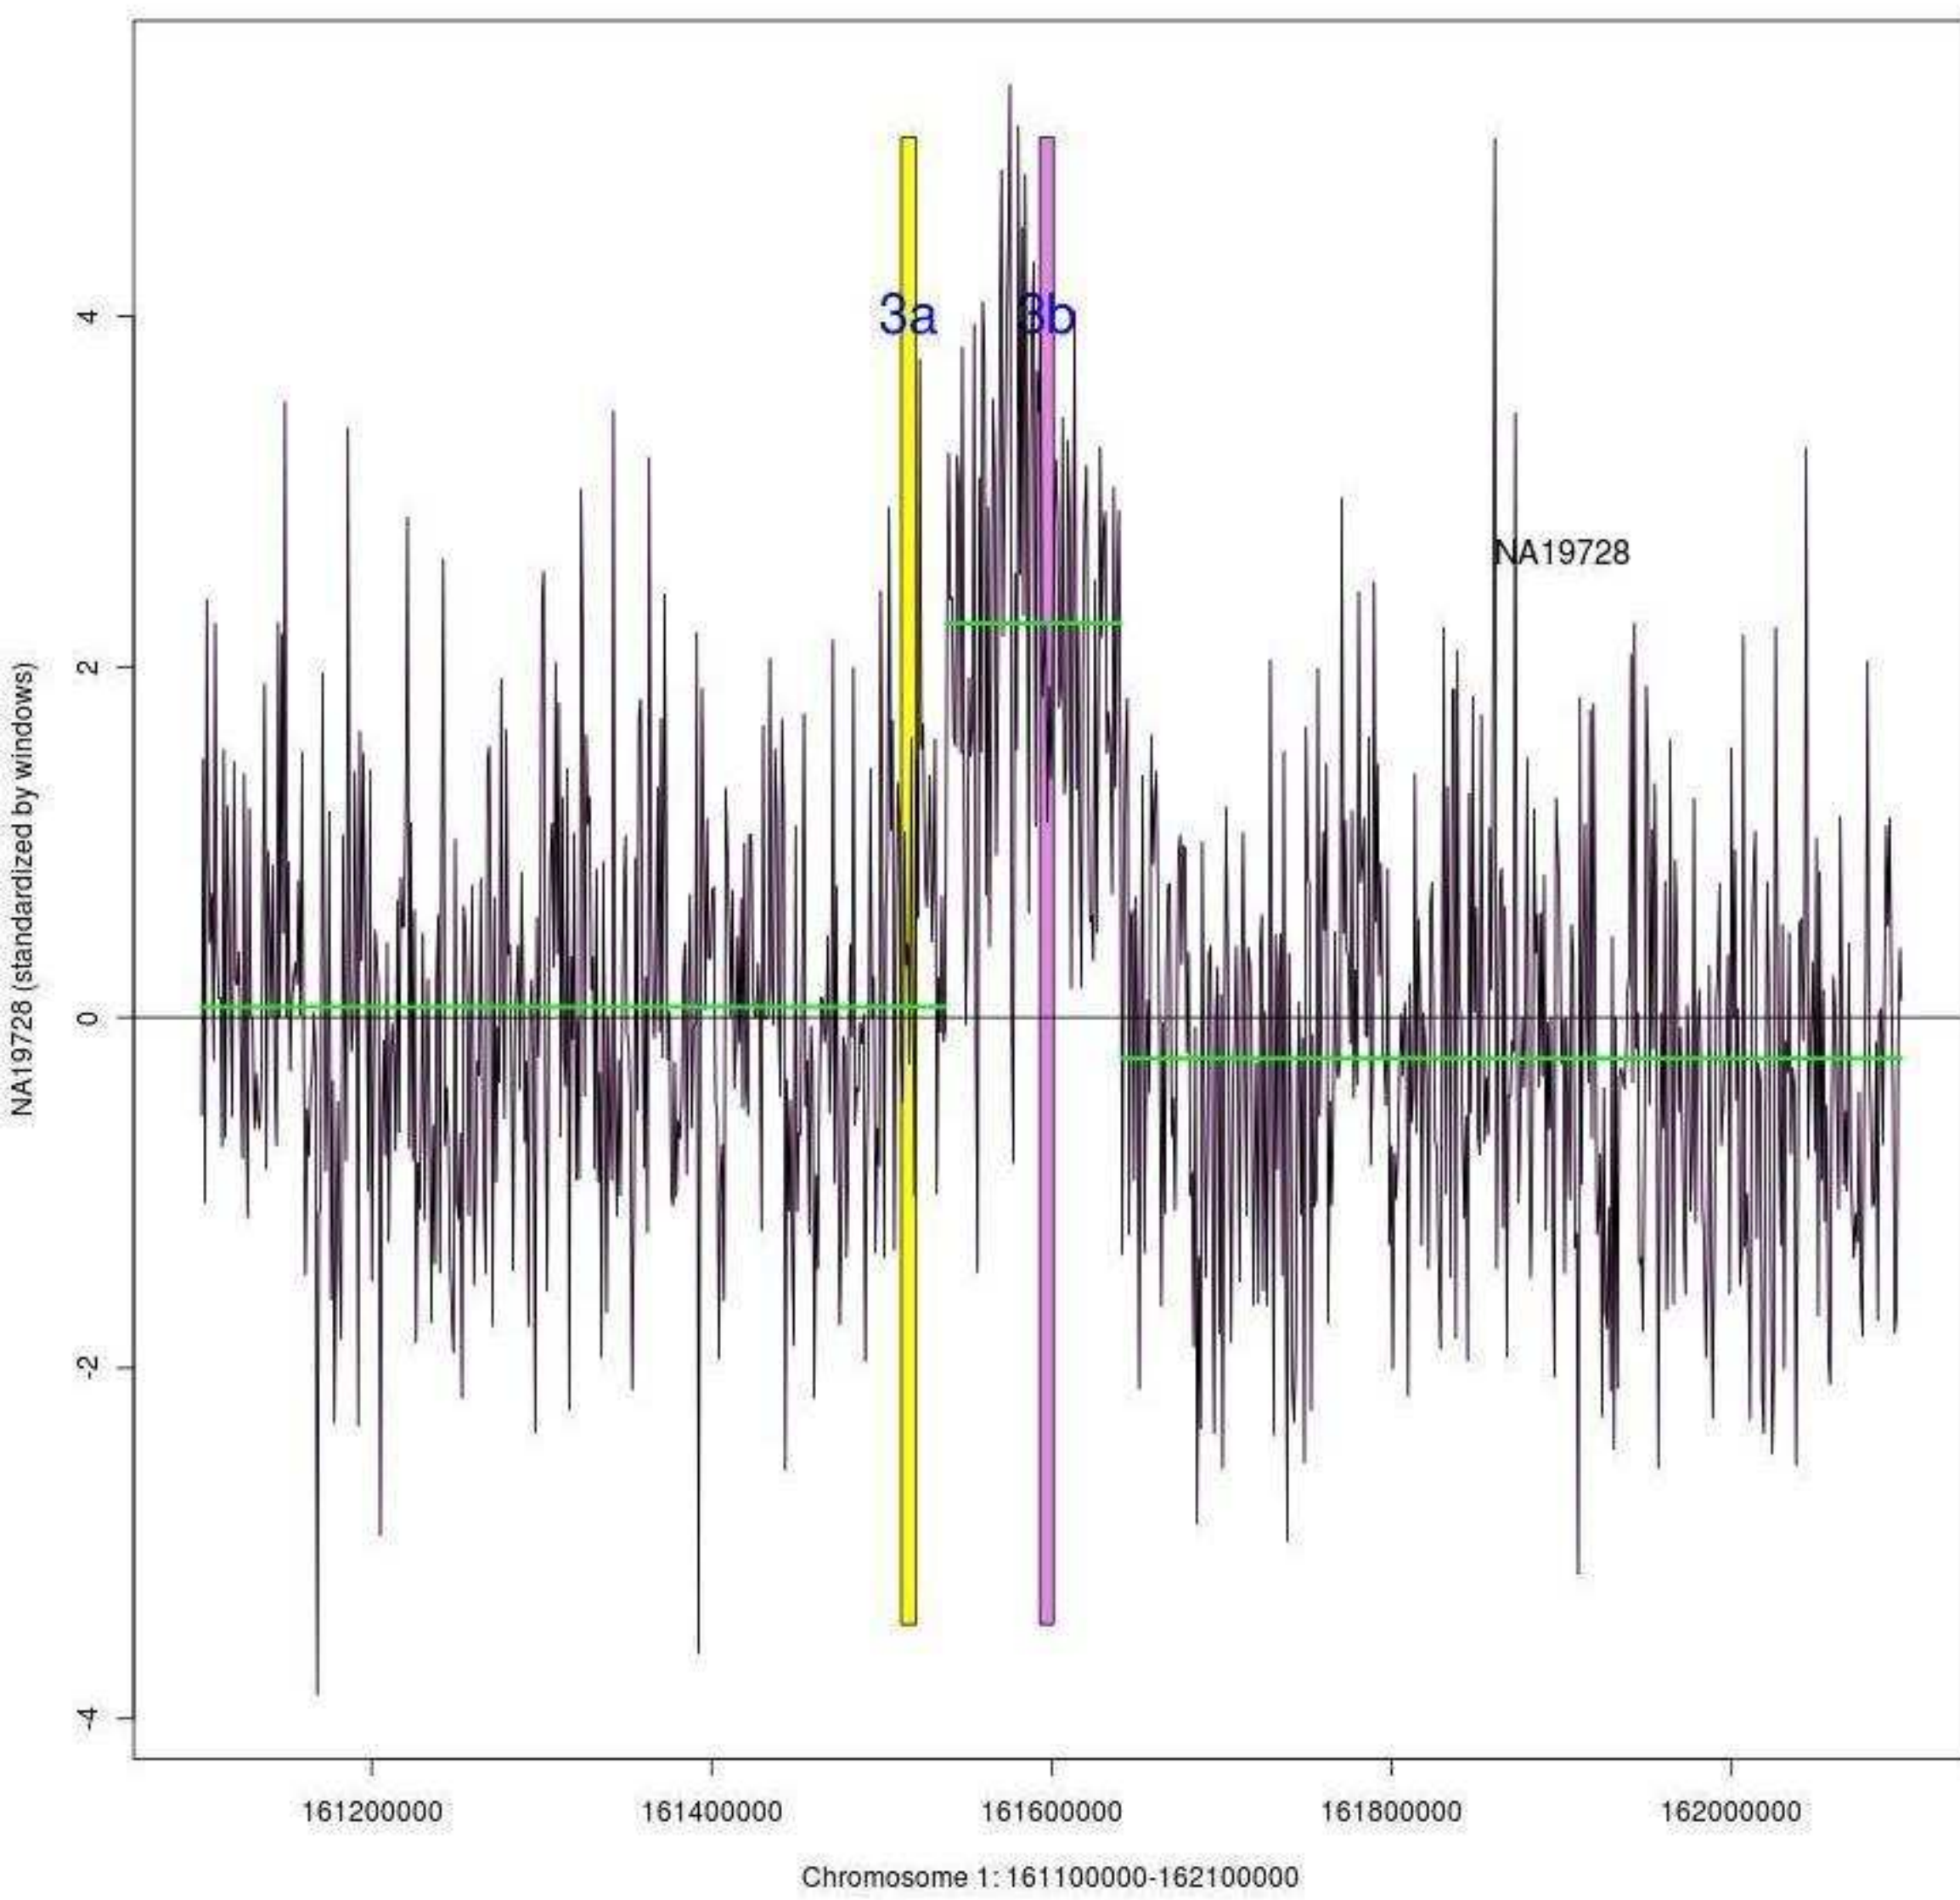

NA19731

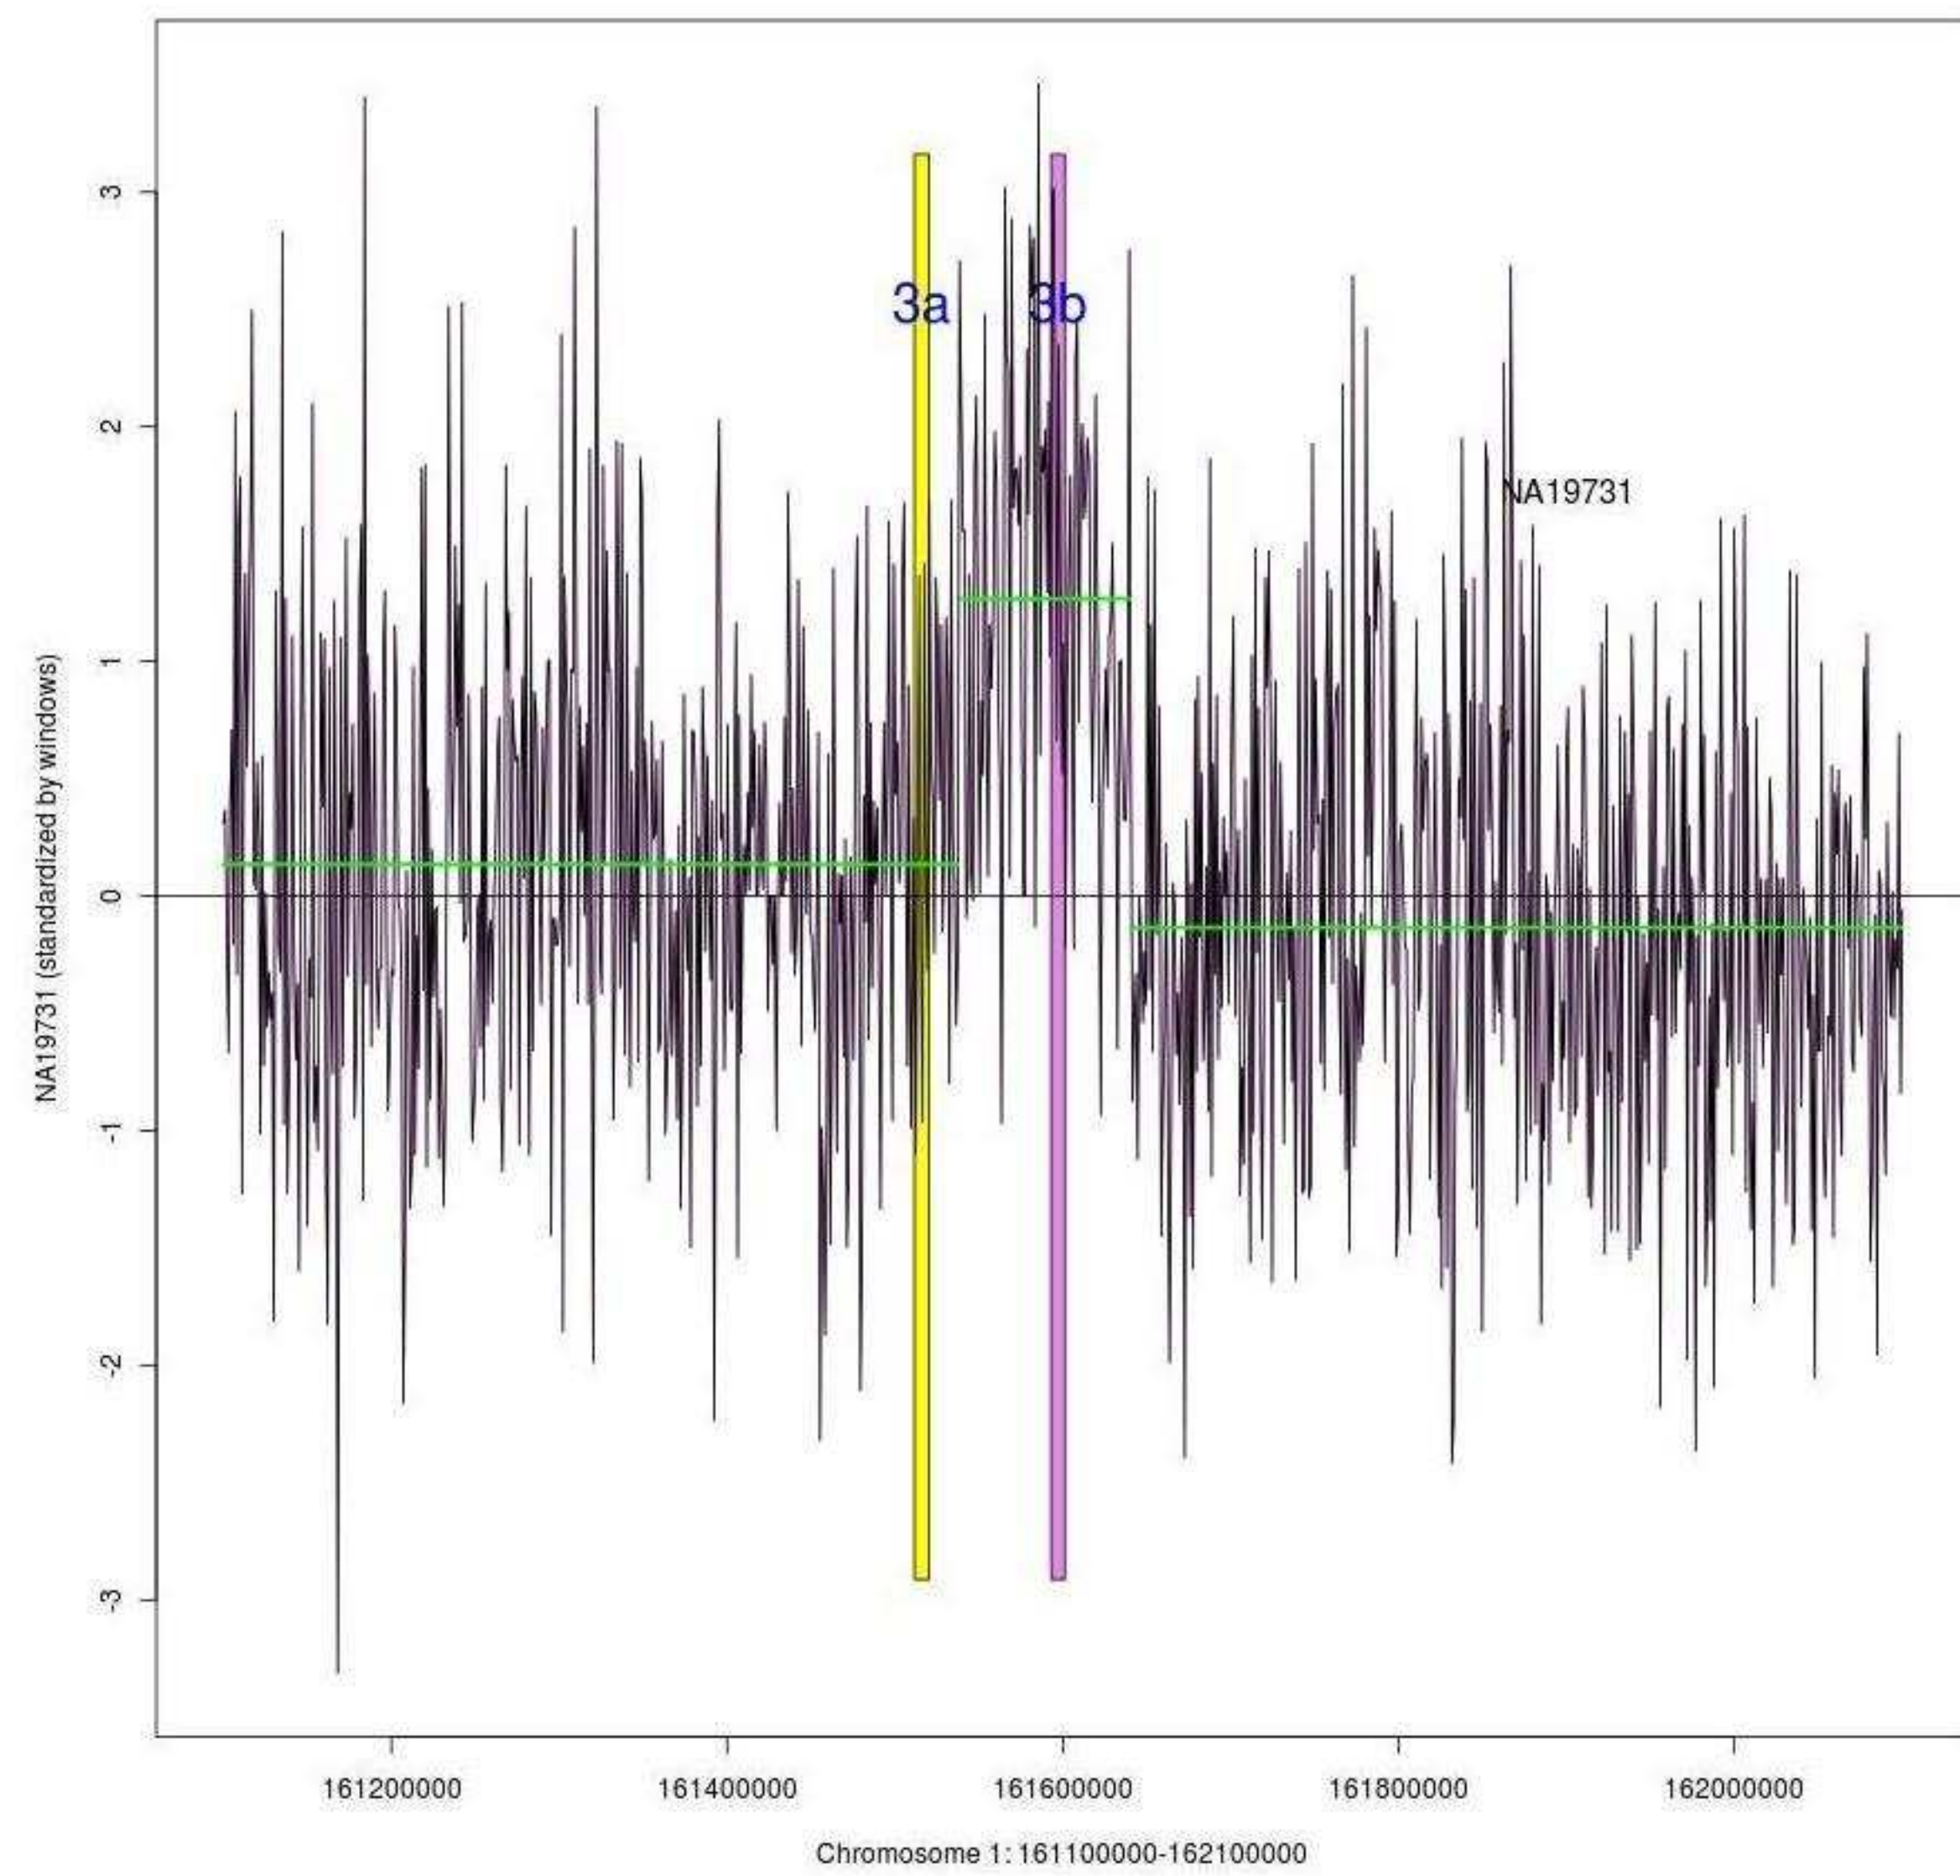



NA19732

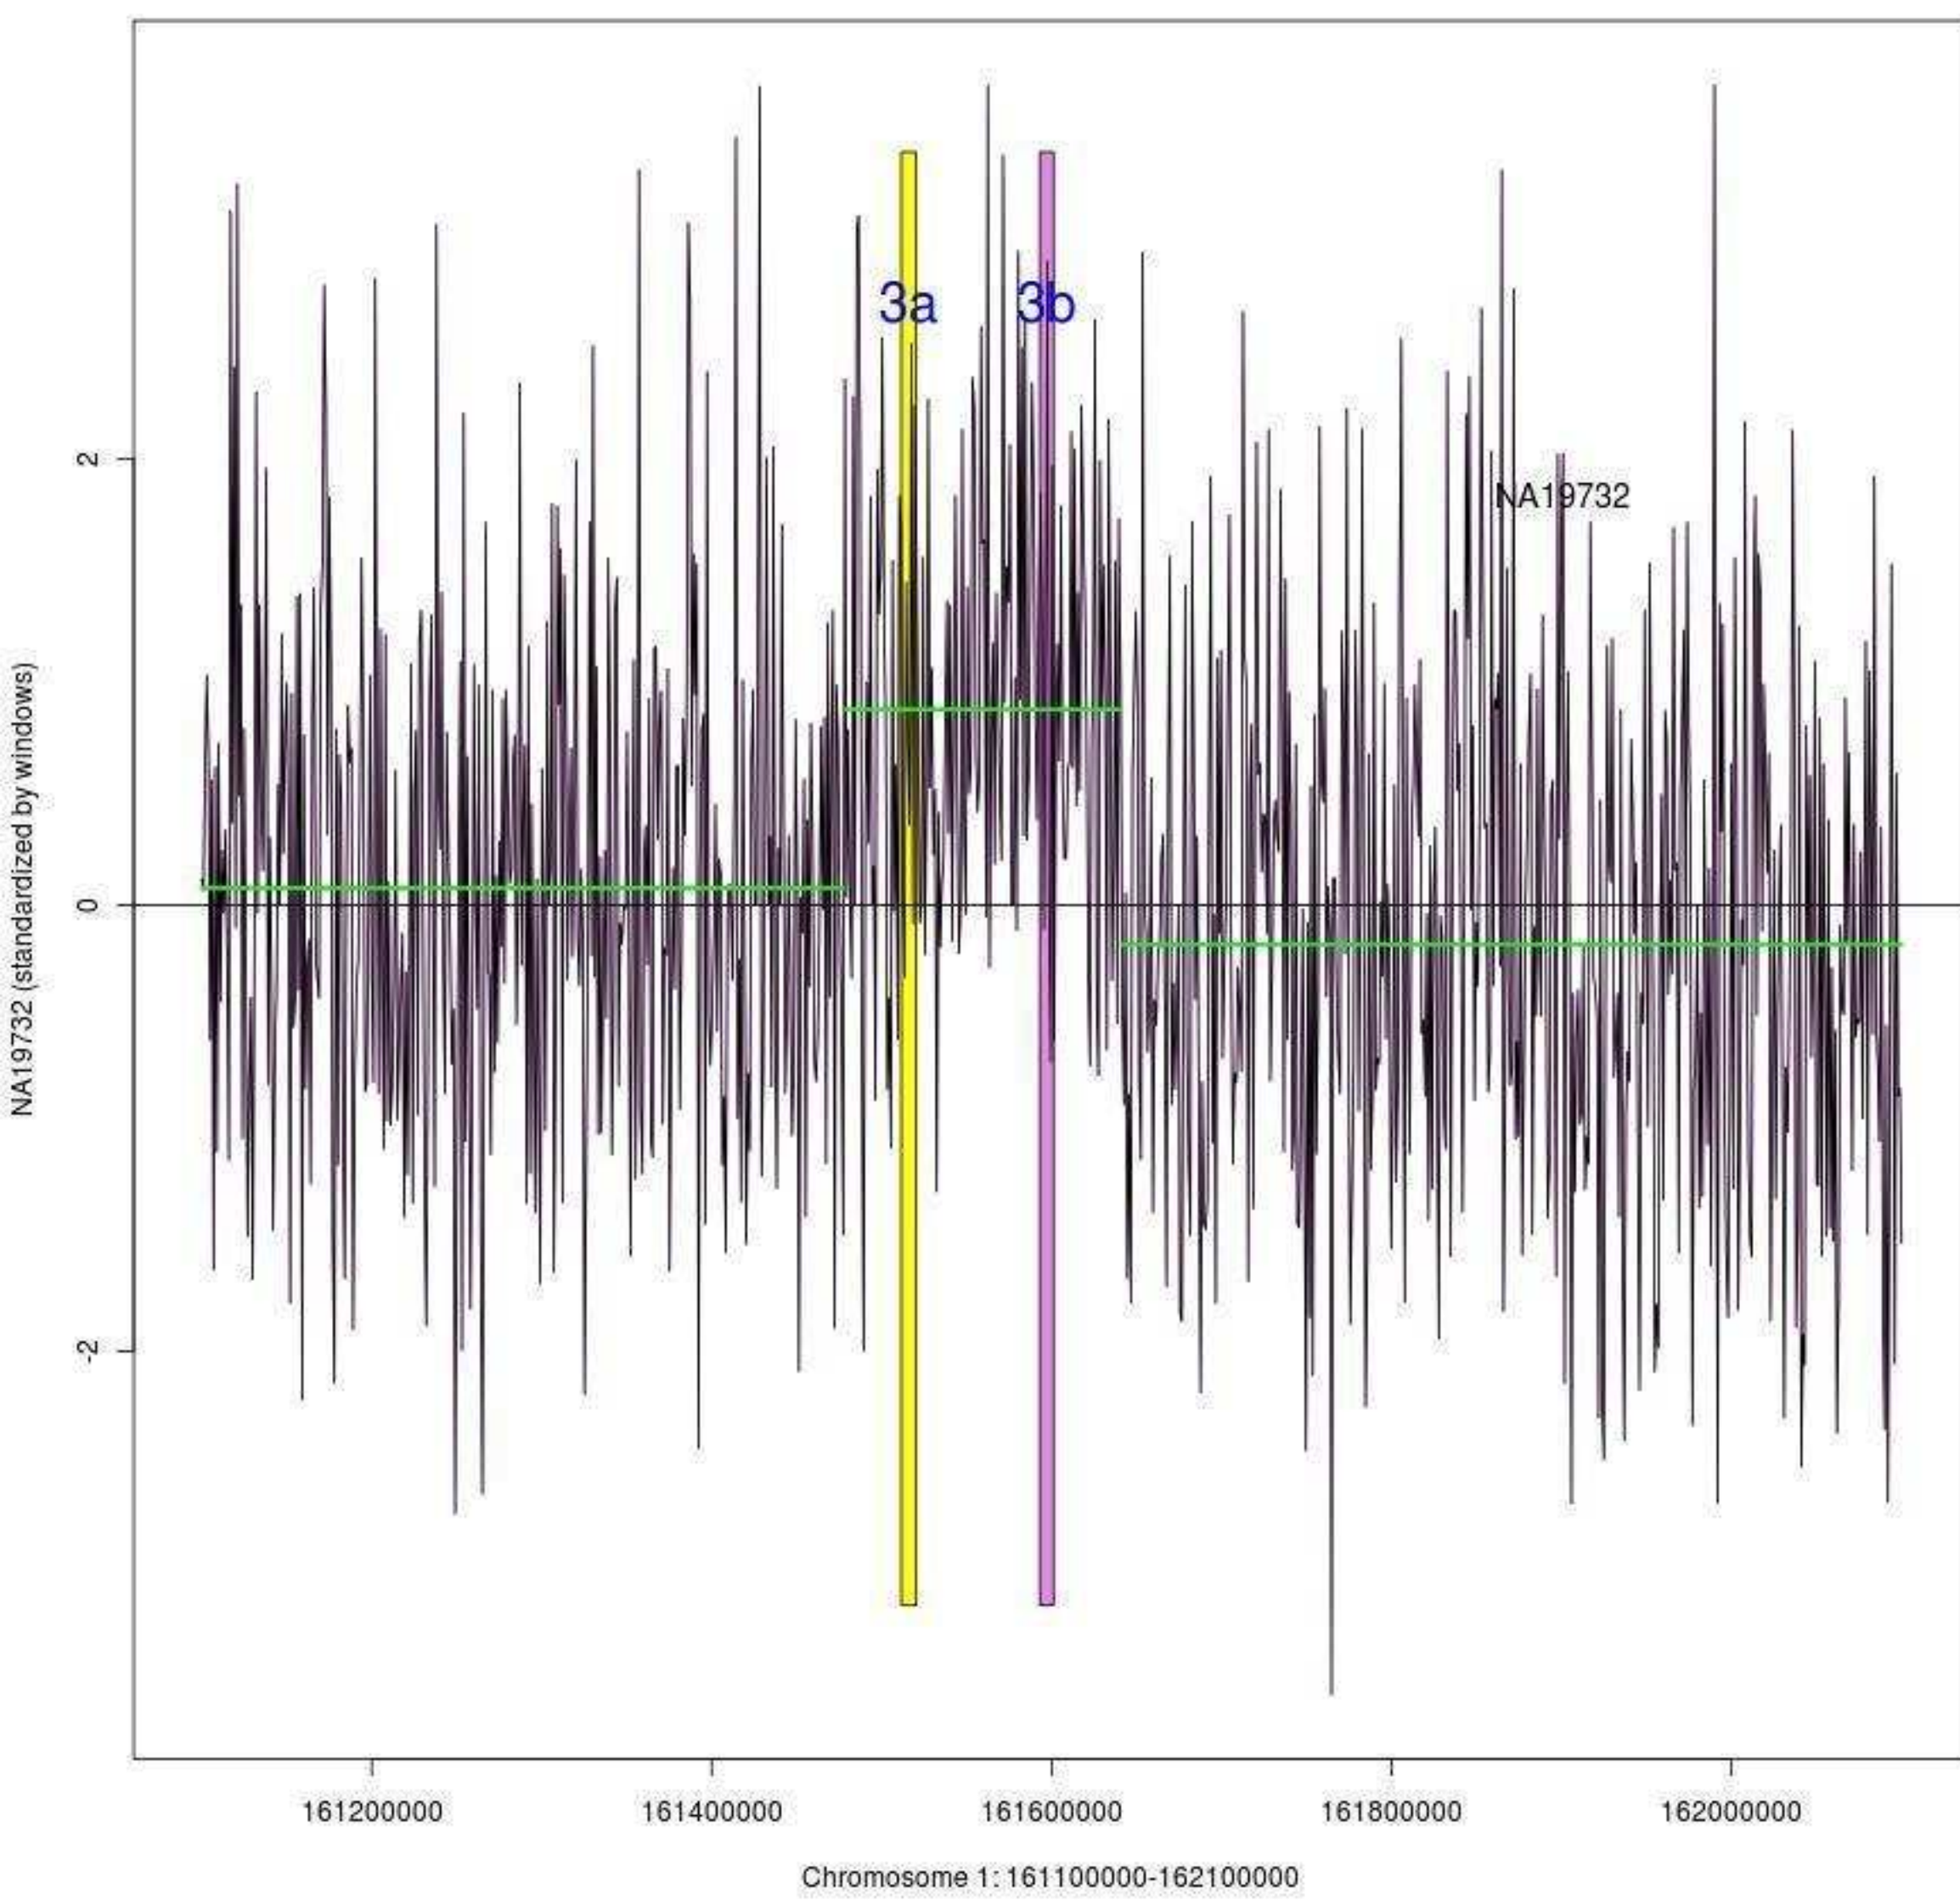

NA19749

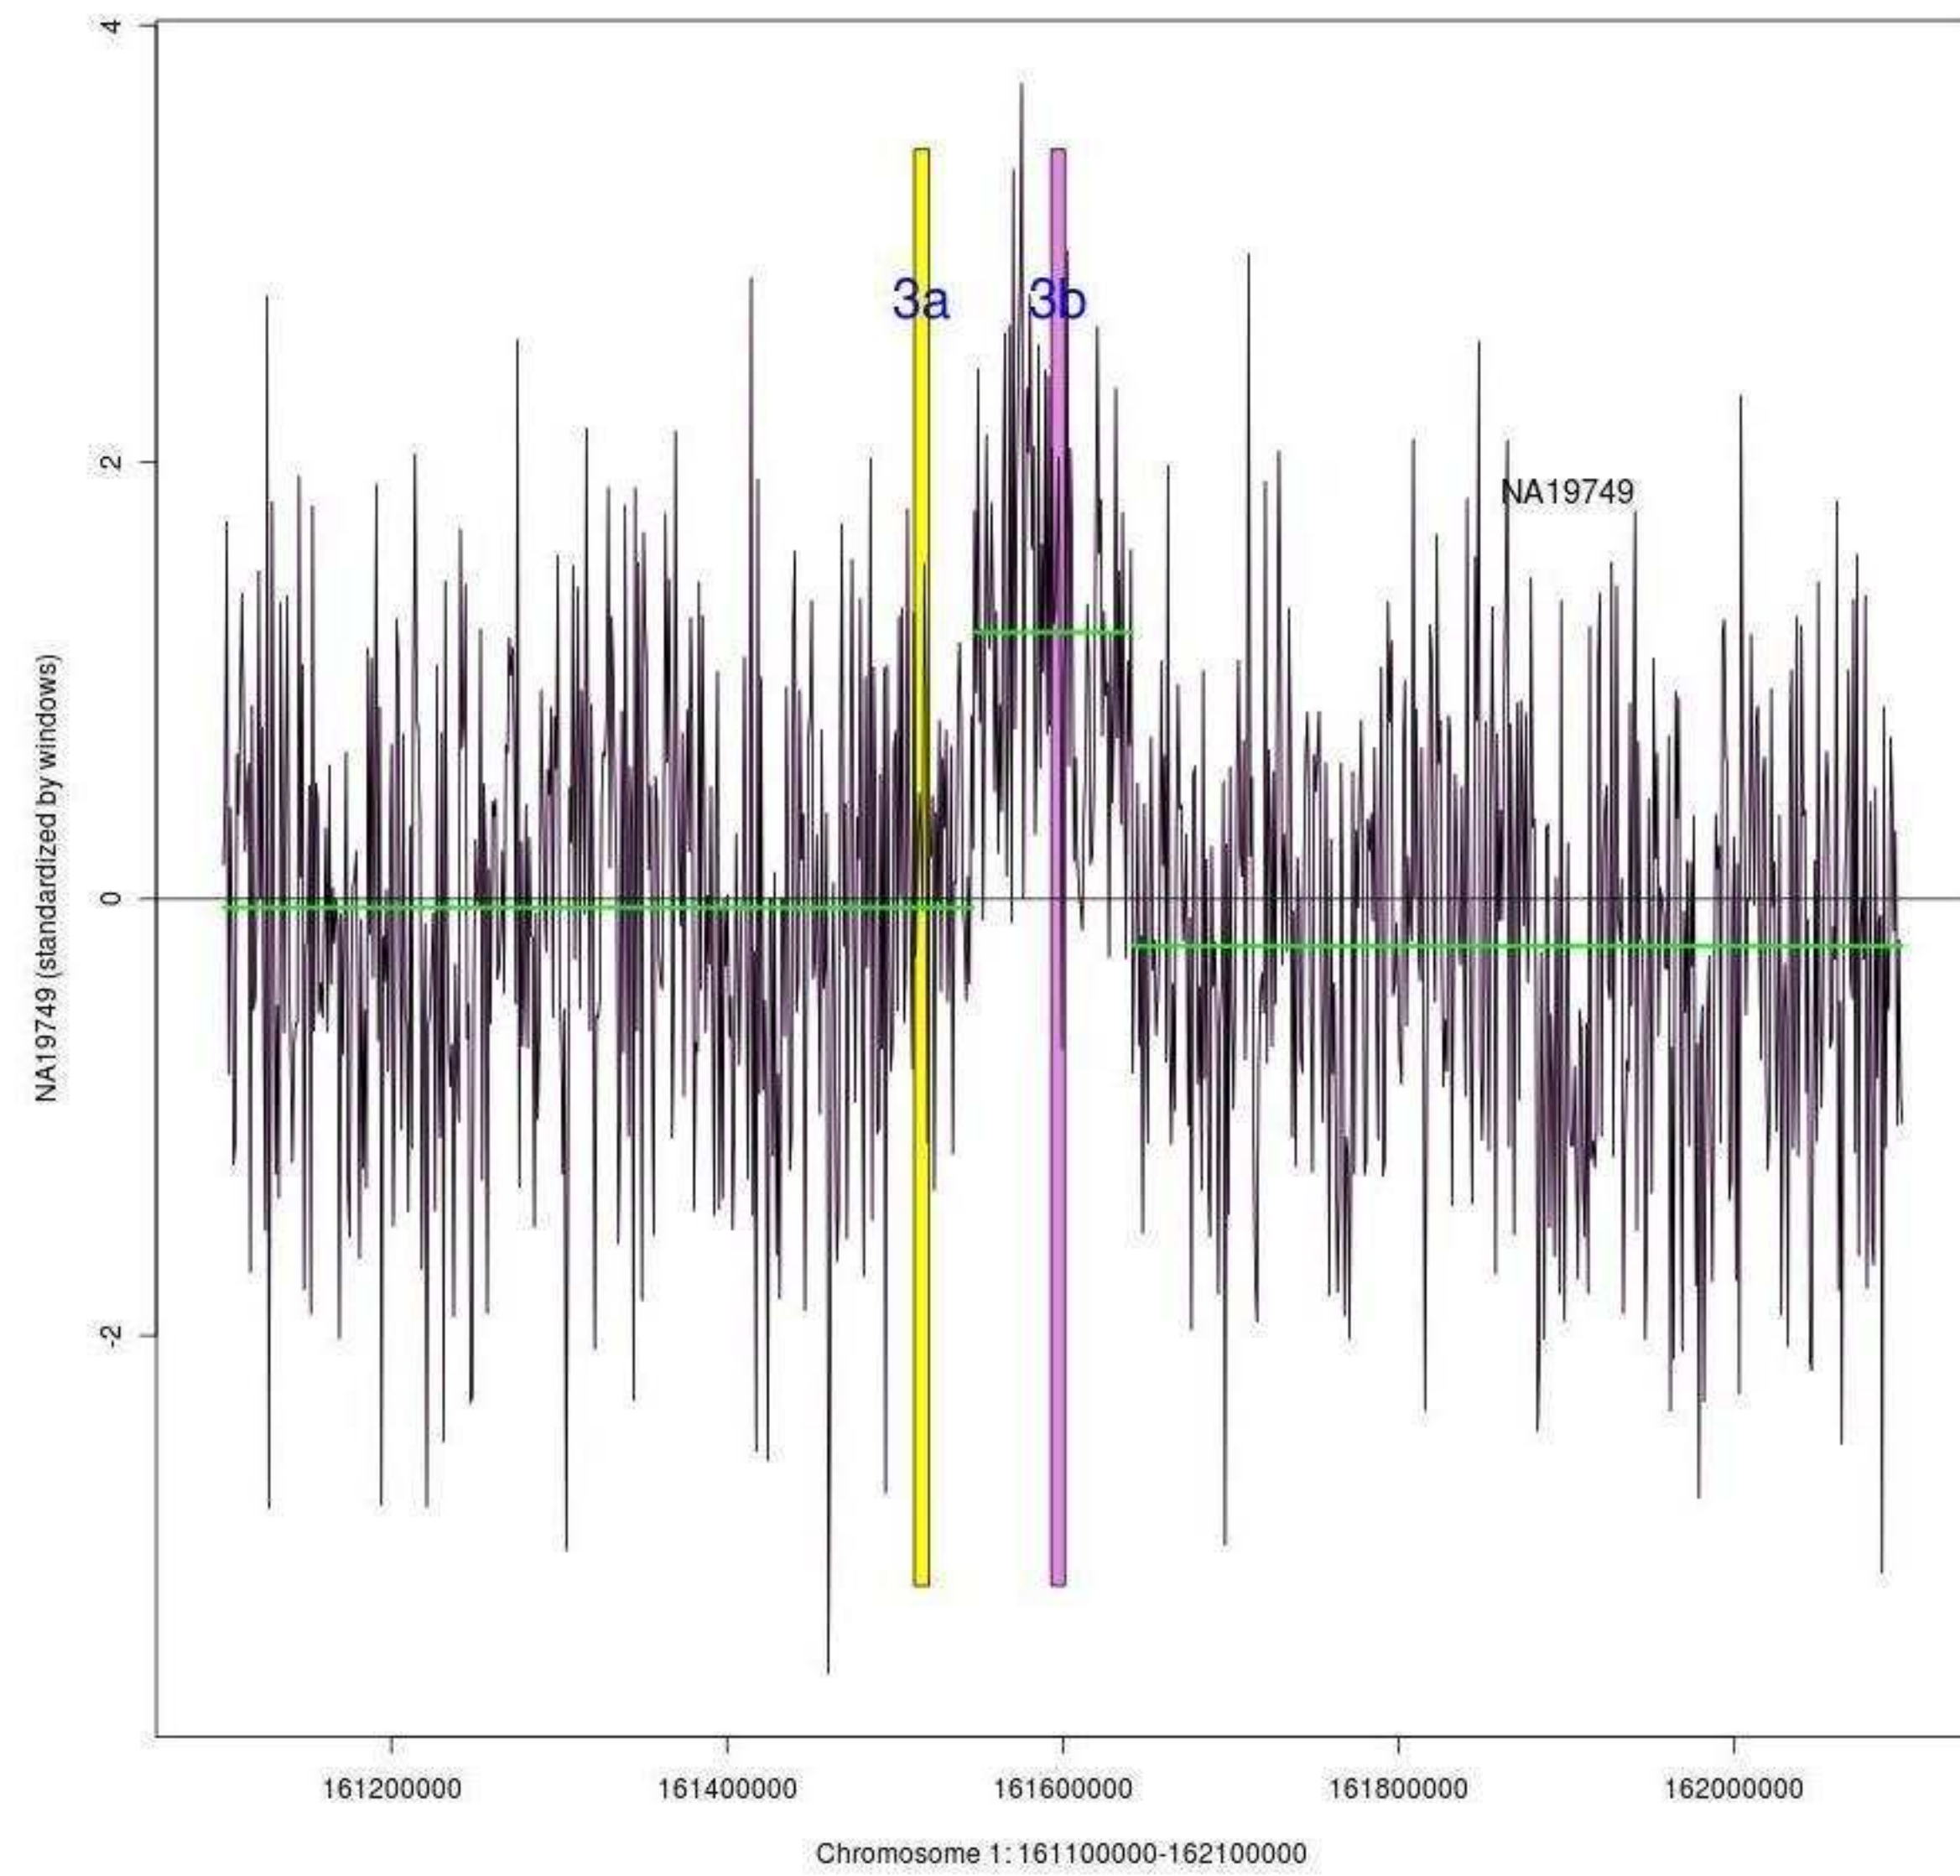

NA19756

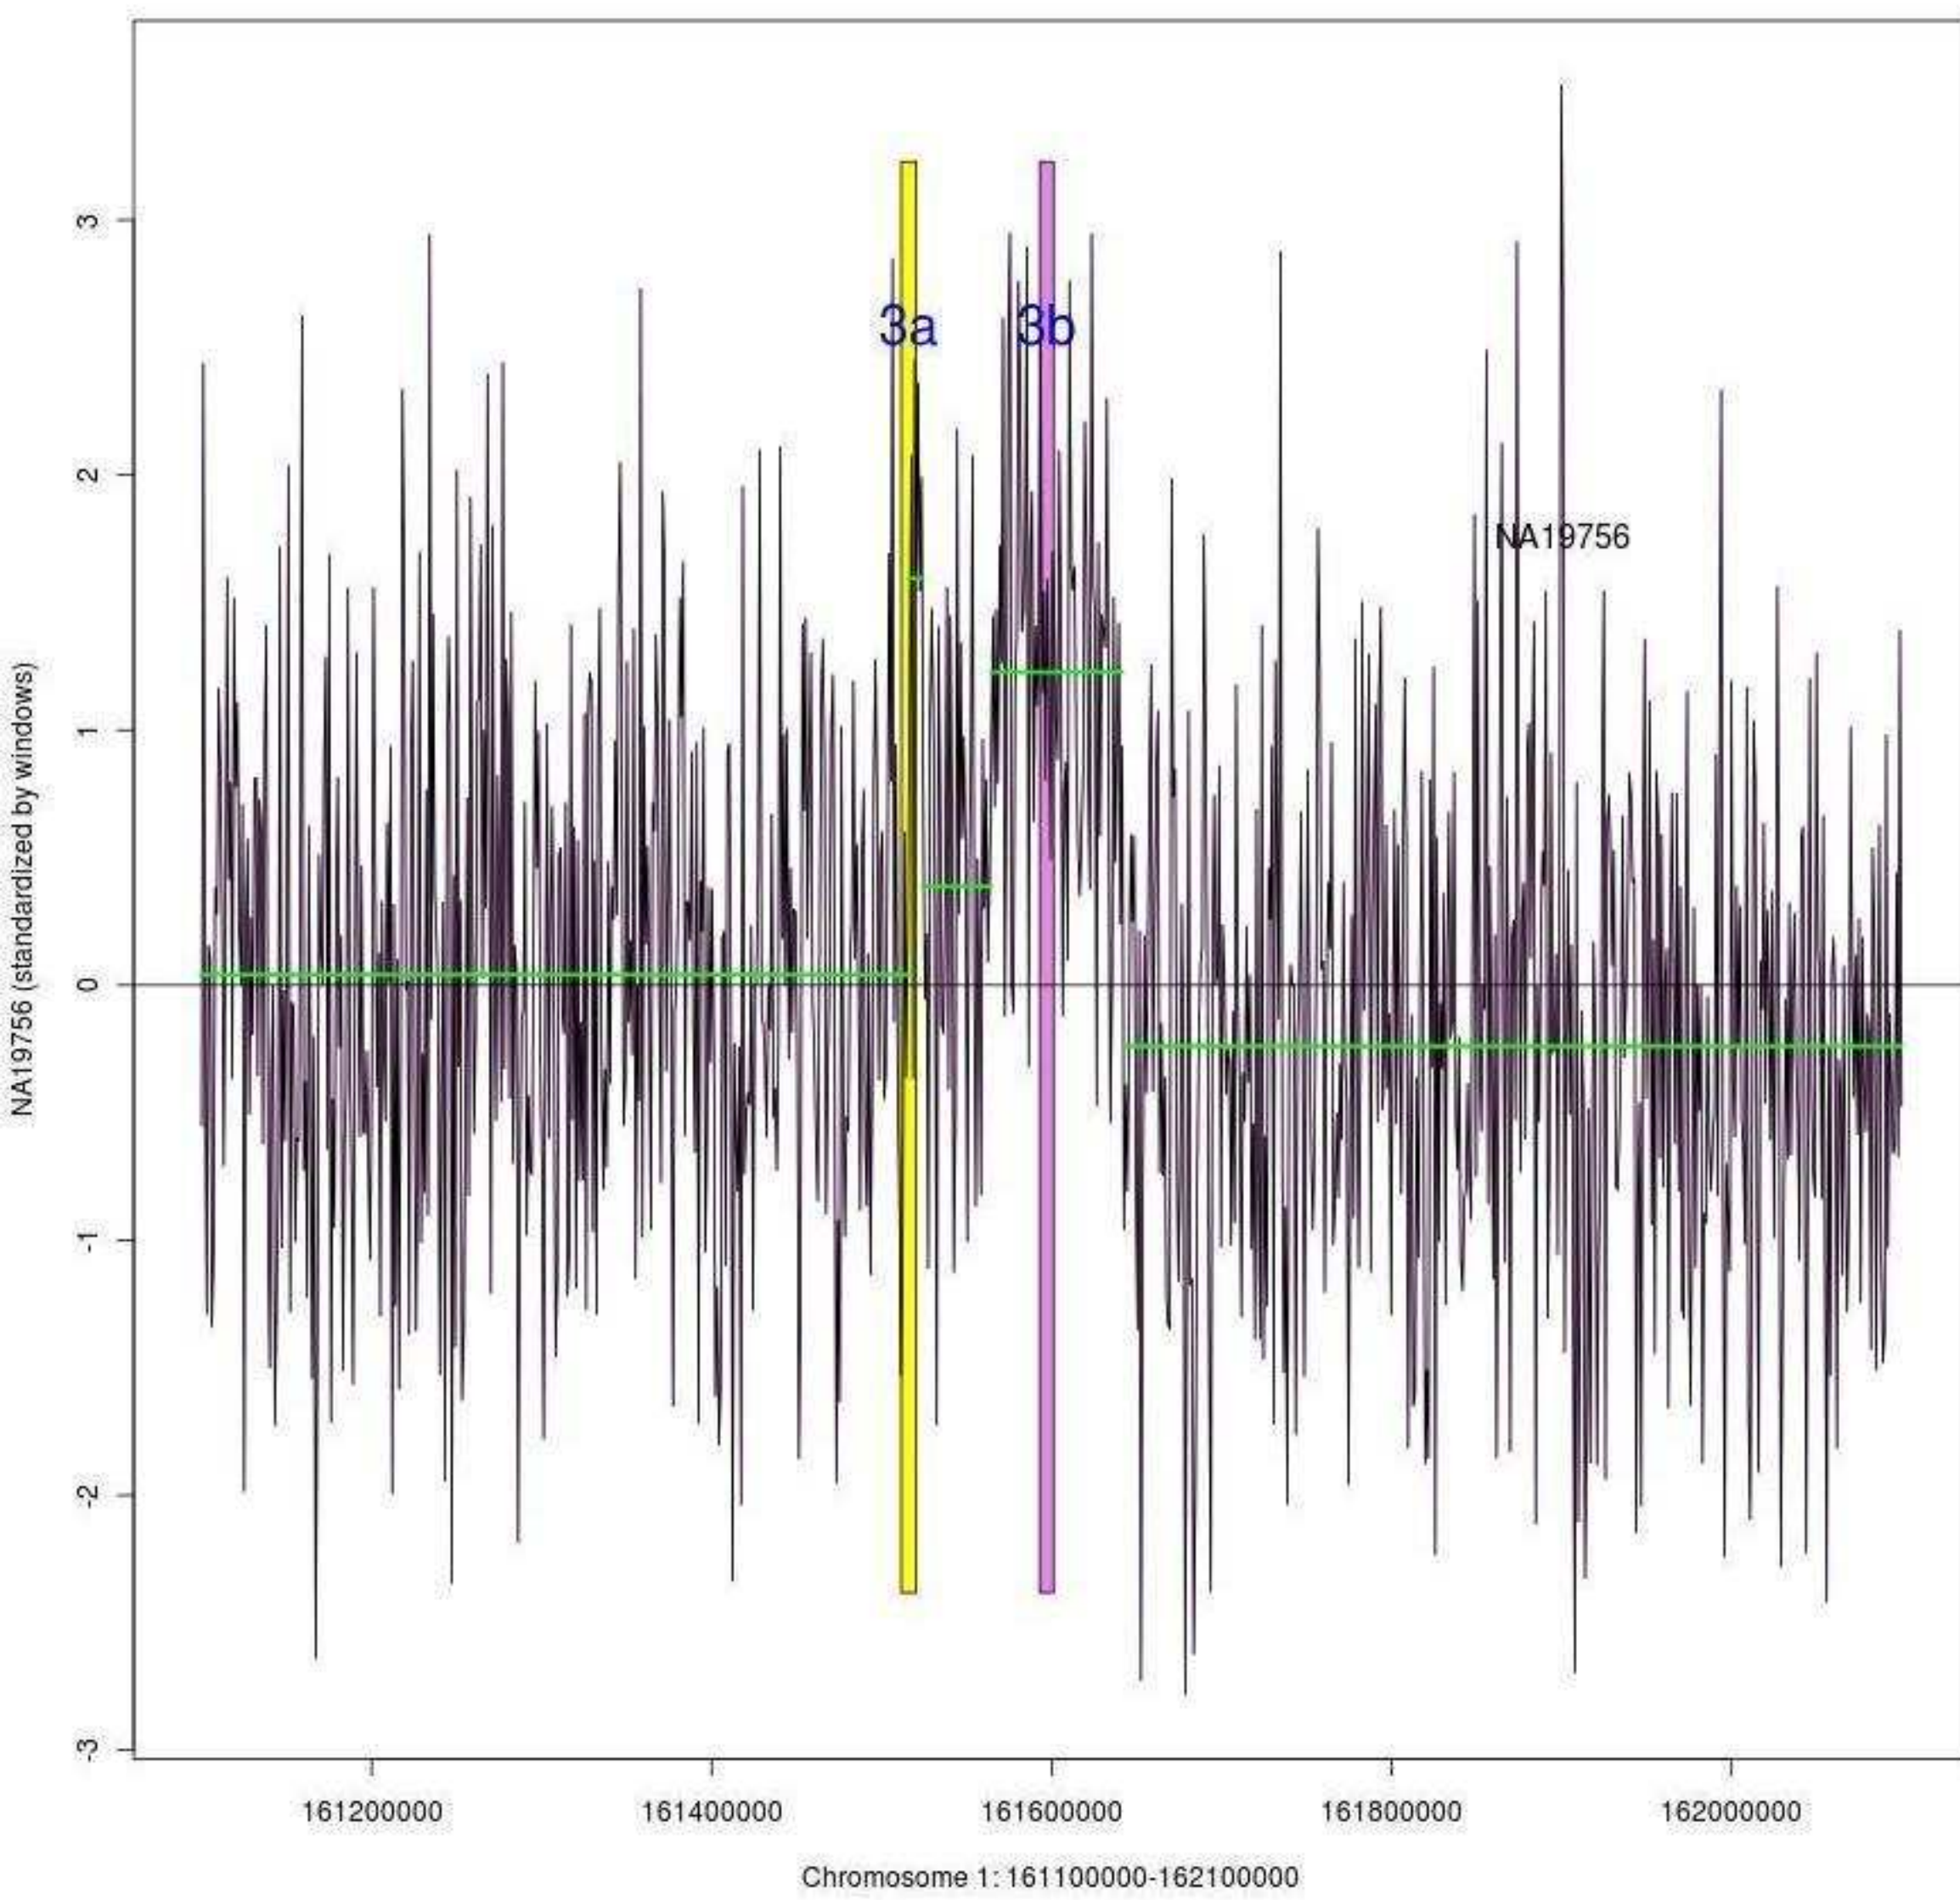

NA19758

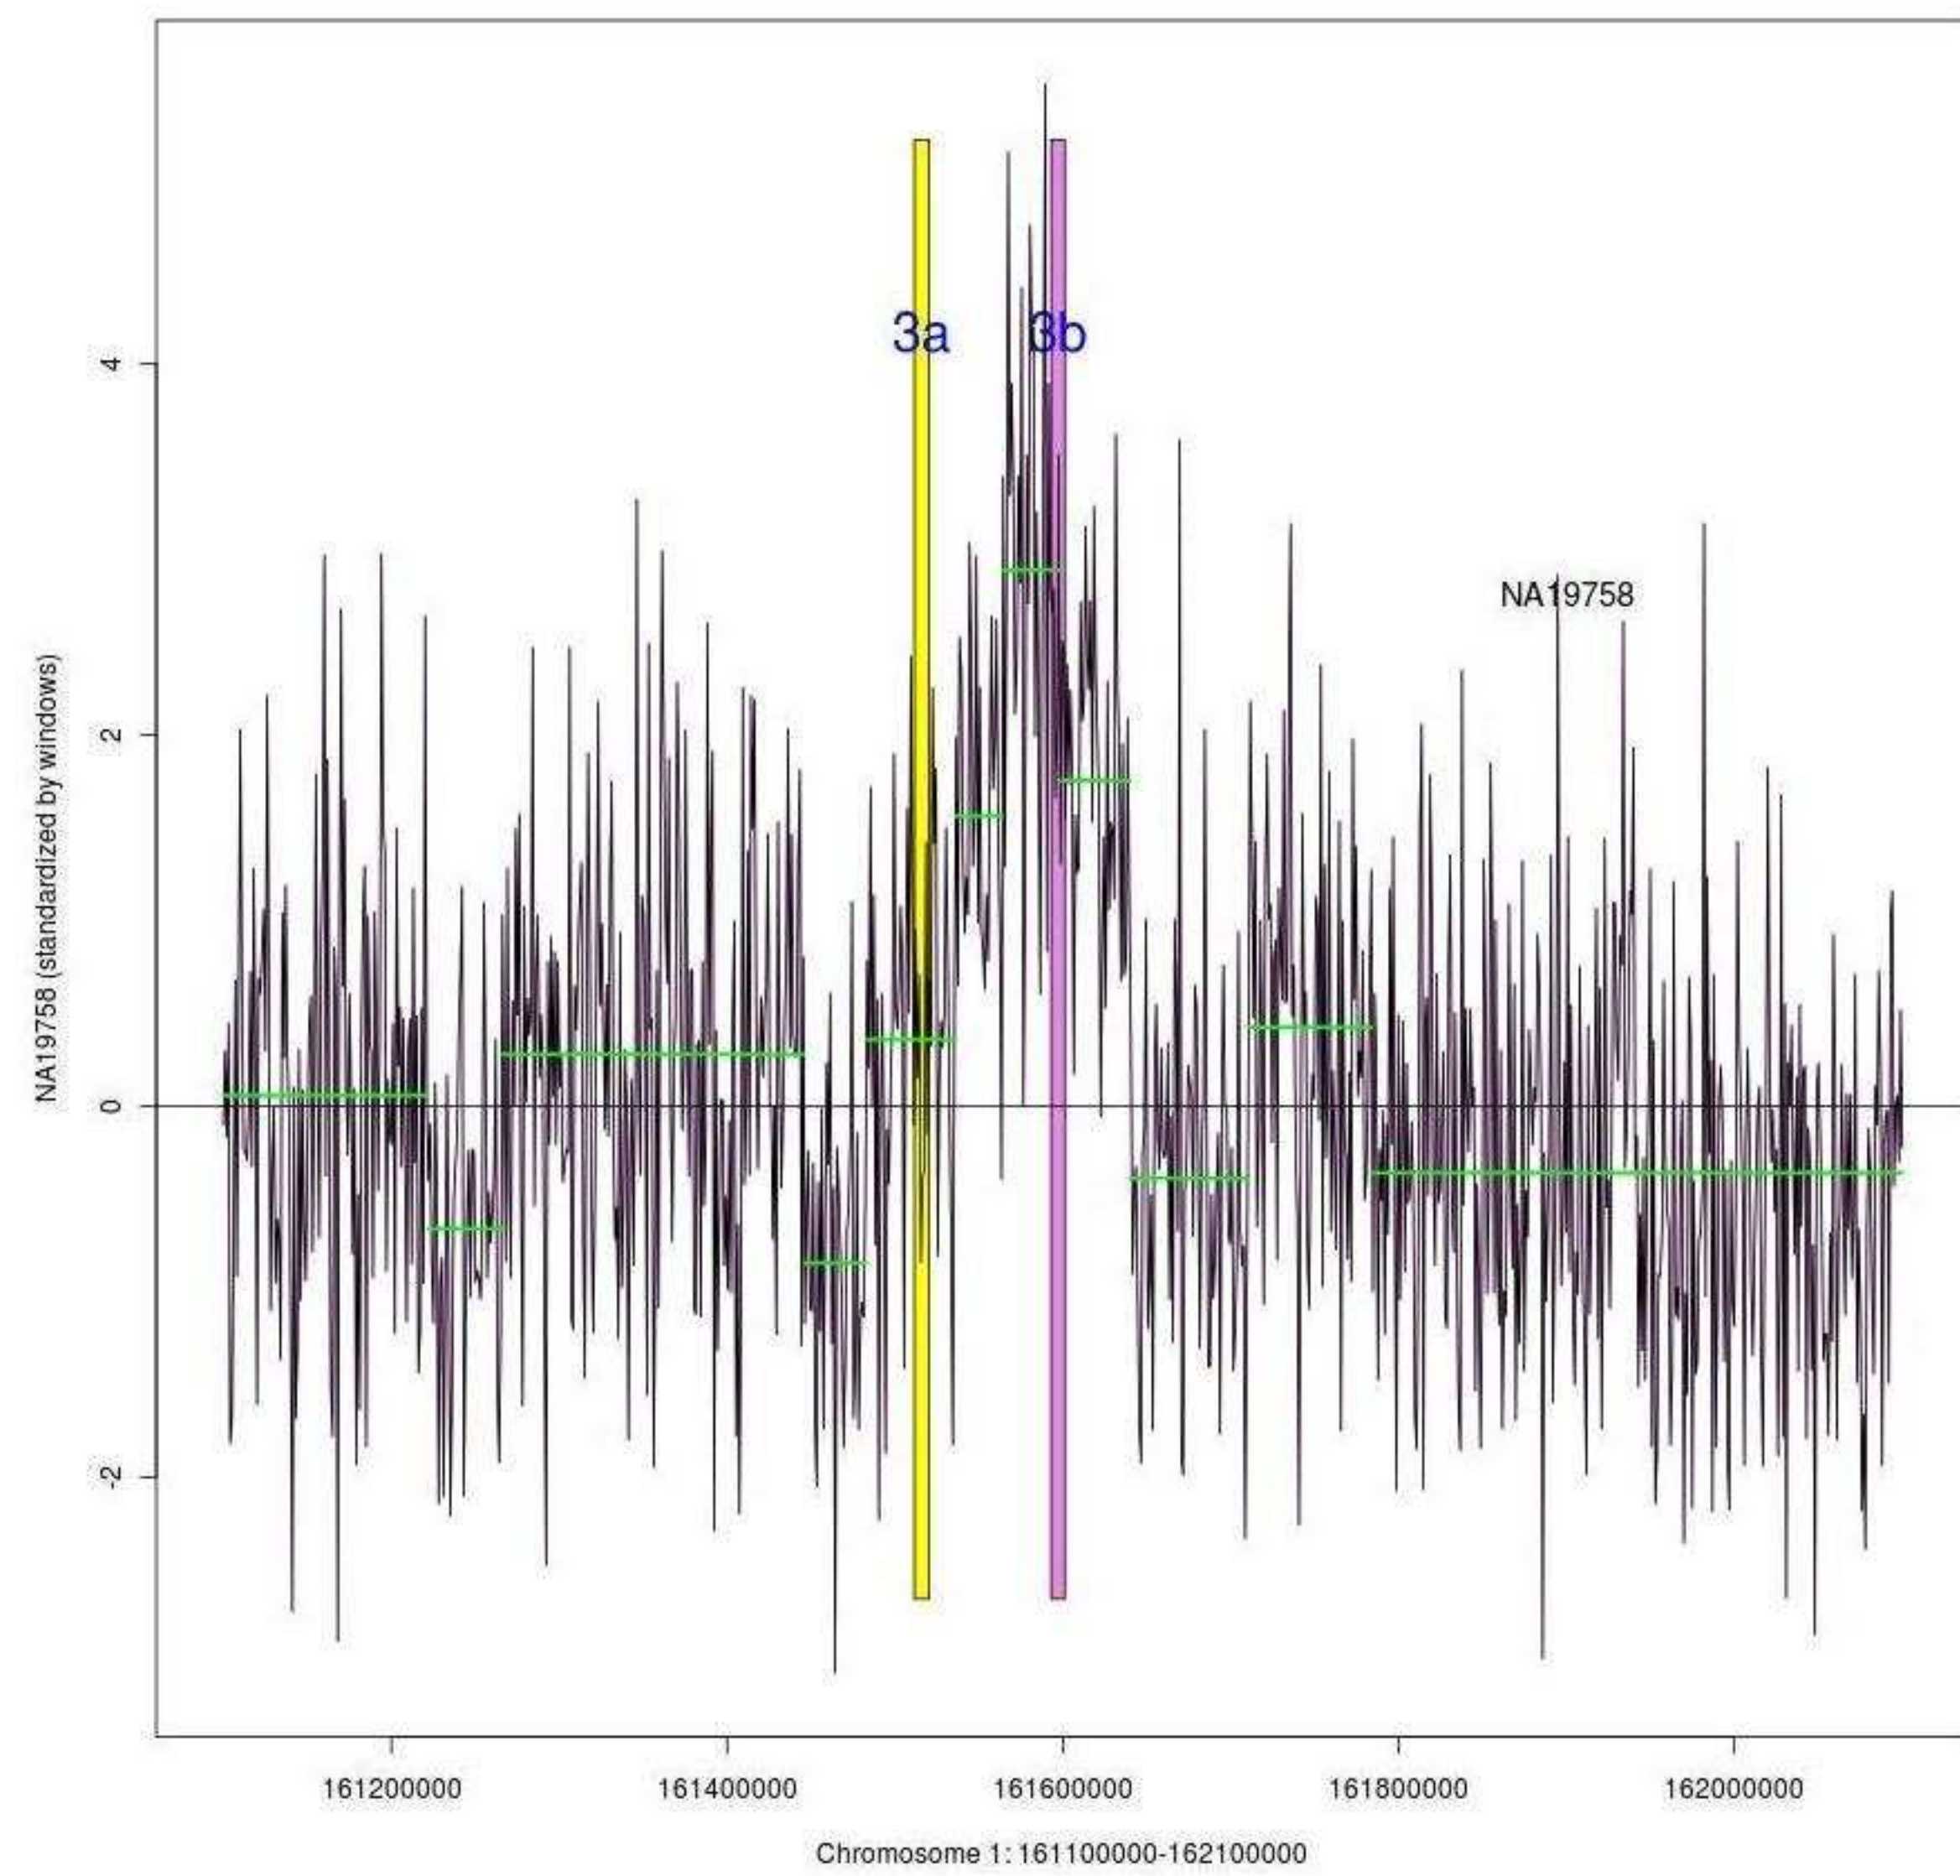



NA19762

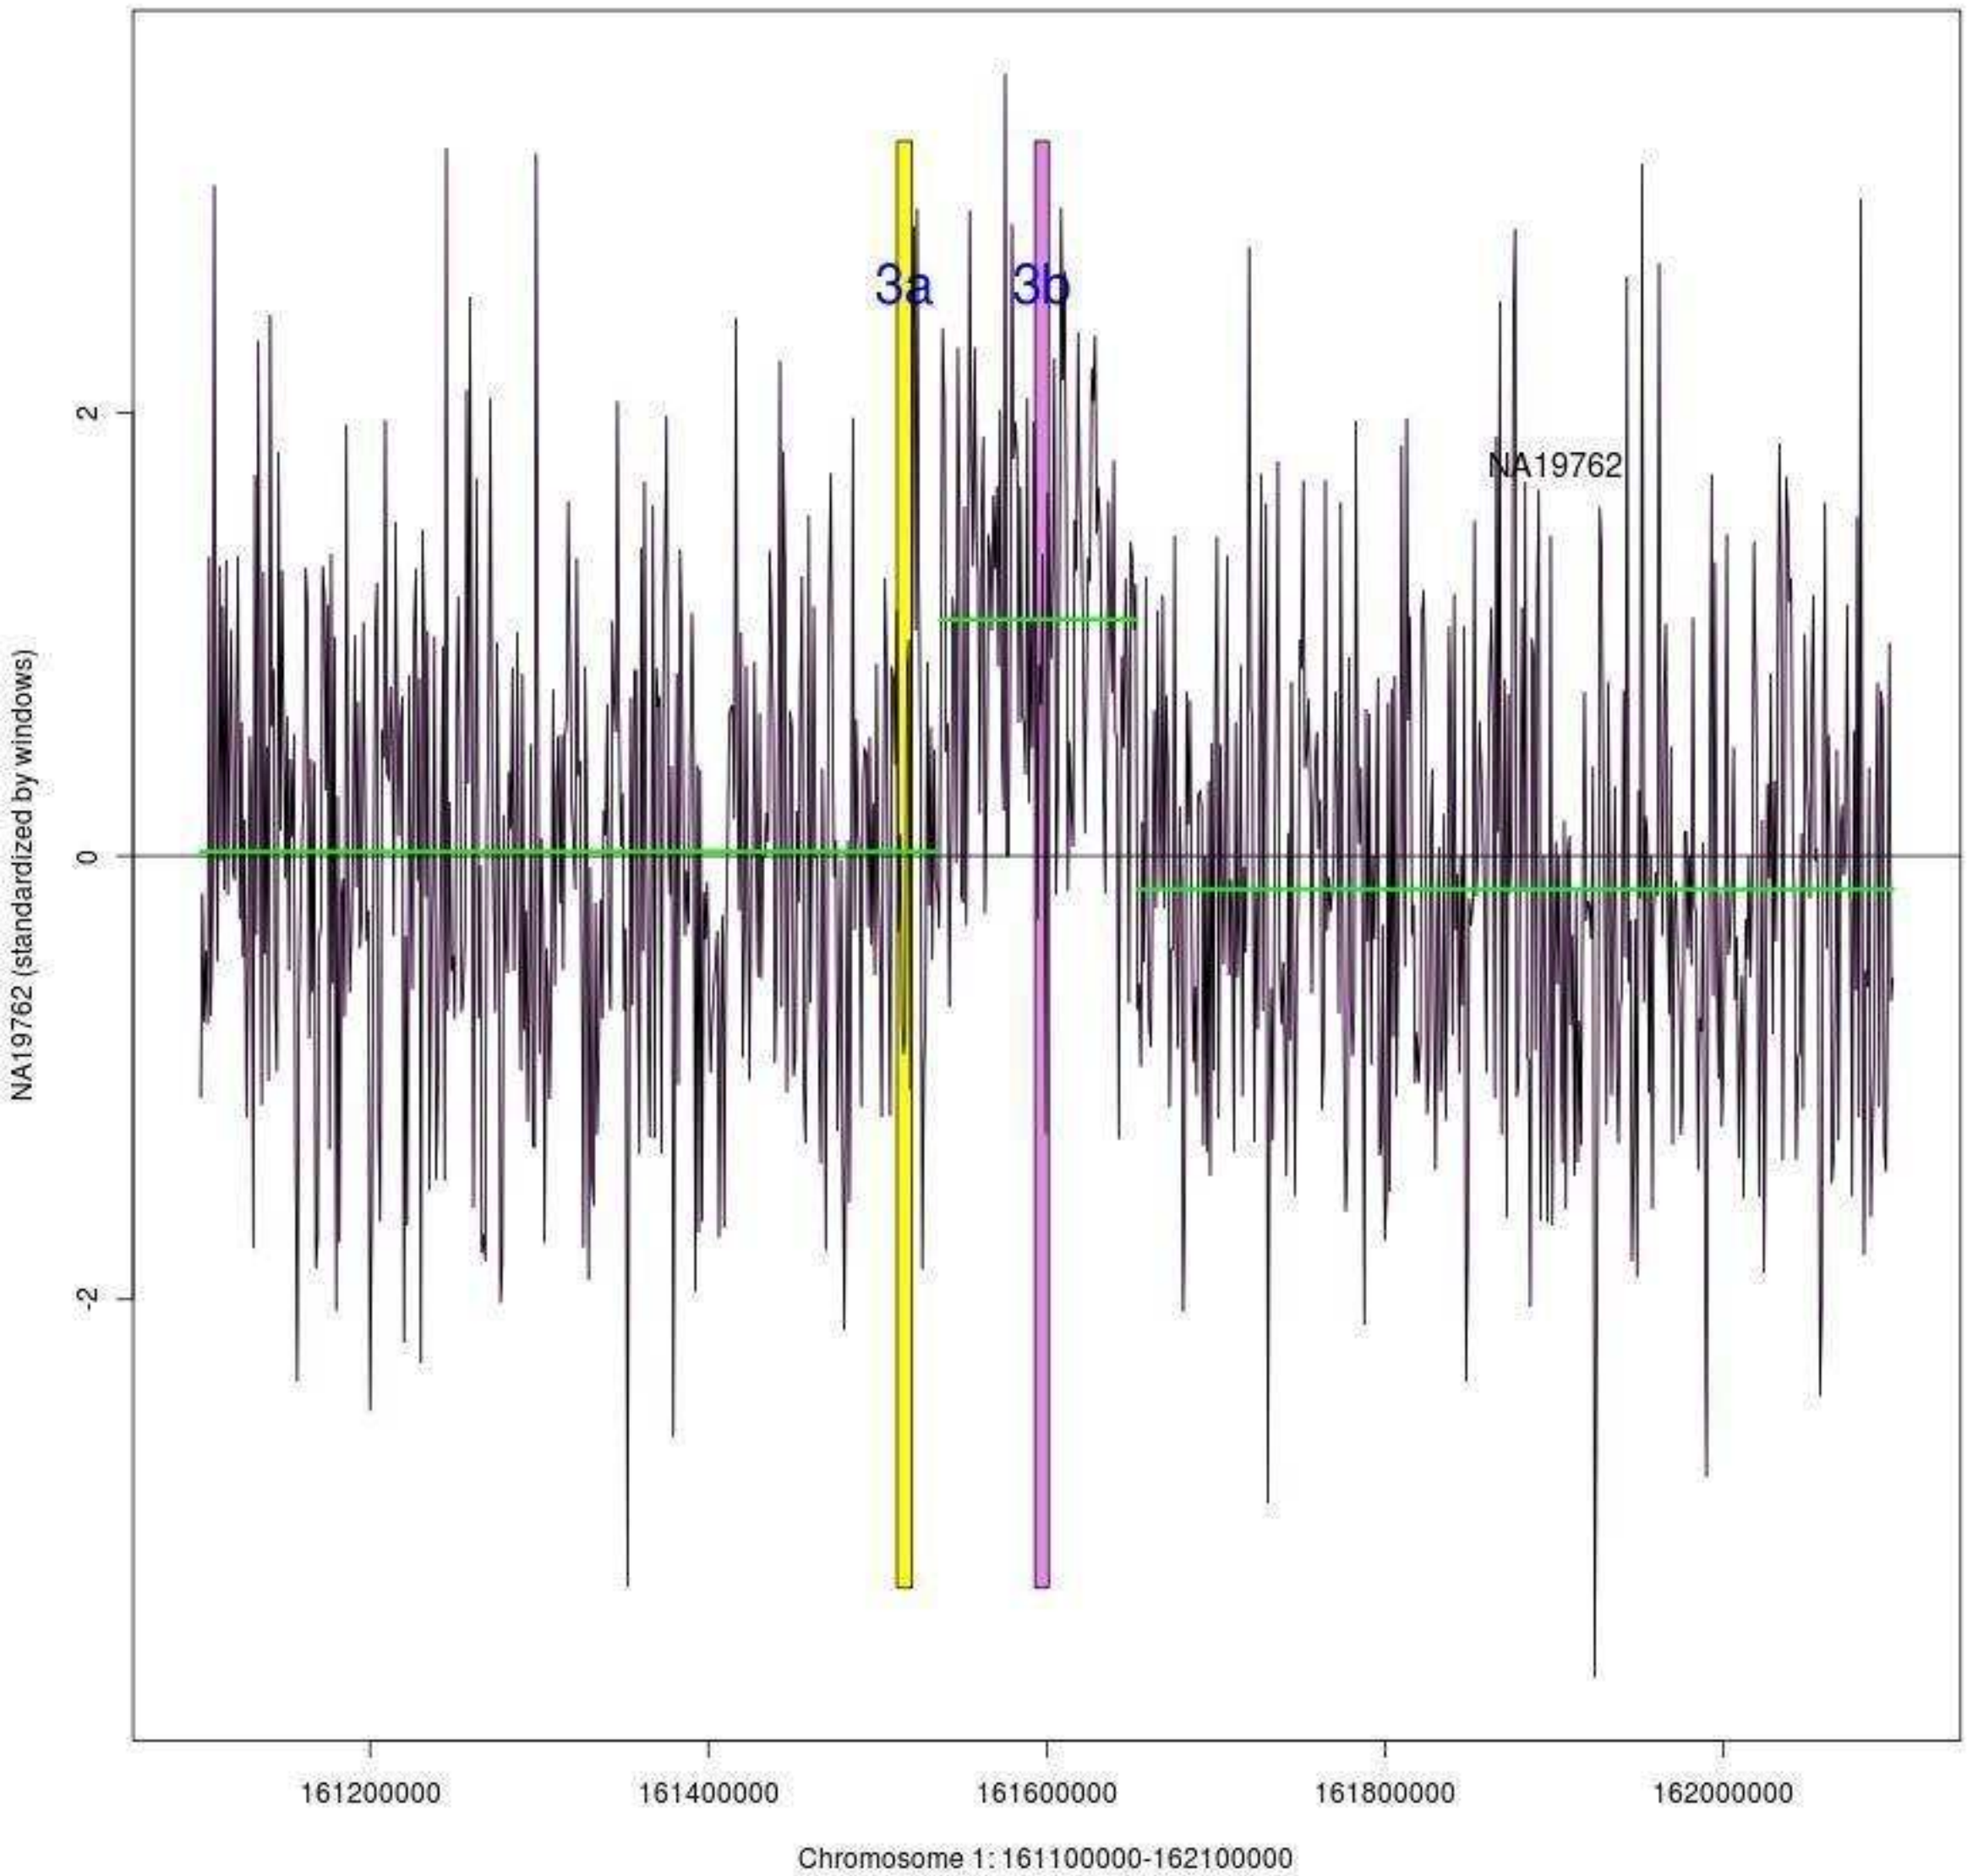

Supplement: pone.0063219.s005.pdf [file pone.0063219.s005.pdf]
