# Supplementary material for: CNVrd, a Read-Depth Algorithm for Assigning Copy-Number at the FCGR Locus: Population-Specific Tagging of Copy Number Variation at FCGR3B
Source: PubMed Central journal article supplement (PMC3640002; doi:10.1371/journal.pone.0063219), 2013-04-30

### FCGR2A

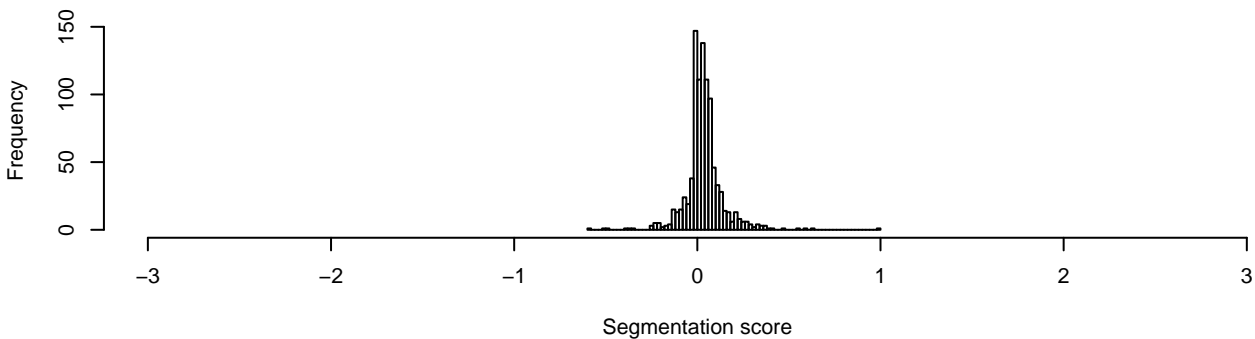

### FCGR2B

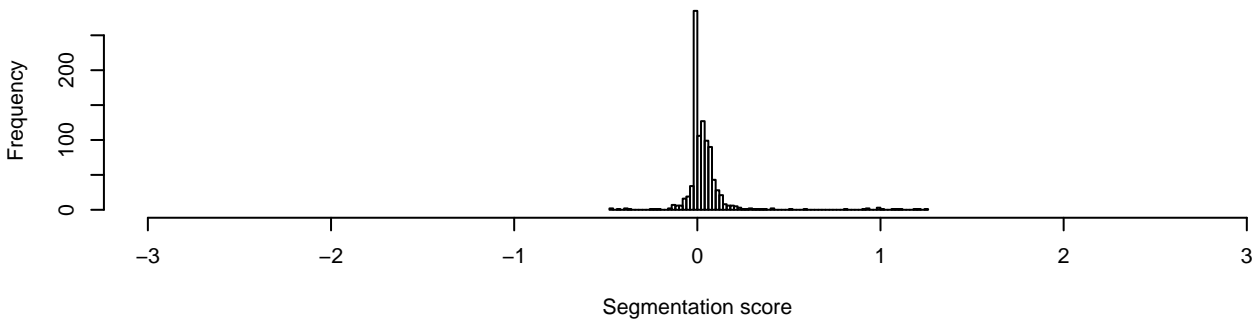

### FCGR2C

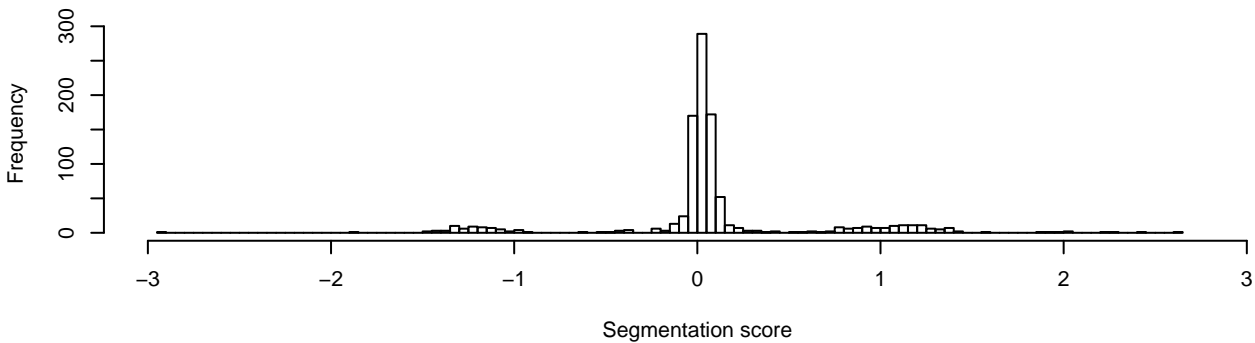

Supplement: pone.0063219.s007.pdf [file pone.0063219.s007.pdf]
